# Supplementary material for: Protein and Microbial Biomarkers in Sputum Discern Acute and Latent Tuberculosis in Investigation of Pastoral Ethiopian Cohort
Source: Front Cell Infect Microbiol. 2021 Jun 4;11:595554. doi: 10.3389/fcimb.2021.595554 (PMC8212885; doi:10.3389/fcimb.2021.595554)
Supplement: Supplementary file 1 [file DataSheet_1.xlsx]

## Sheet: A. Human proteins
Supplementary Datasheet 1. All protein identifications from LC-MS/MS analysis, with human and Mycobacterium tuberculosis protein IDs listed separately, and the MaxQuant data matrix for LFQ-quantified human proteins.
A. Human dataset. A high-resolution high-mass accuracy Q-Exactive mass spectrometer and Sequest-HT as the database search algorithm were used to identify proteins with at least 2 unique peptides per protein group.
Accession	Description	Σ# PSMs	Σ# Peptides	Σ# Proteins	Σ# Unique Peptides	ΣCoverage	MW [kDa]	calc. pI
P02788	Lactotransferrin OS=Homo sapiens GN=LTF PE=1 SV=6 - [TRFL_HUMAN]	207009	125	1	123	92.54	78.1319	8.11865
P02768	Serum albumin OS=Homo sapiens GN=ALB PE=1 SV=2 - [ALBU_HUMAN]	177256	126	1	126	95.07	69.3215	6.27783
P01876	Ig alpha-1 chain C region OS=Homo sapiens GN=IGHA1 PE=1 SV=2 - [IGHA1_HUMAN]	134847	61	1	28	98.87	37.6306	6.50732
Q9HC84	Mucin-5B OS=Homo sapiens GN=MUC5B PE=1 SV=3 - [MUC5B_HUMAN]	132808	172	2	162	33.77	595.96	6.63916
P04745	Alpha-amylase 1 OS=Homo sapiens GN=AMY1A PE=1 SV=2 - [AMY1_HUMAN]	132571	91	1	60	93.93	57.7309	6.93213
P01834	Ig kappa chain C region OS=Homo sapiens GN=IGKC PE=1 SV=1 - [IGKC_HUMAN]	112333	23	1	18	100	11.6017	5.87158
P61626	Lysozyme C OS=Homo sapiens GN=LYZ PE=1 SV=1 - [LYSC_HUMAN]	101958	32	1	32	85.81	16.5263	9.15869
P01857	Ig gamma-1 chain C region OS=Homo sapiens GN=IGHG1 PE=1 SV=1 - [IGHG1_HUMAN]	99680	43	1	18	78.79	36.0832	8.19189
Q8TDL5	BPI fold-containing family B member 1 OS=Homo sapiens GN=BPIFB1 PE=1 SV=1 - [BPIB1_HUMAN]	95496	75	3	73	91.94	52.4085	7.2251
P01877	Ig alpha-2 chain C region OS=Homo sapiens GN=IGHA2 PE=1 SV=3 - [IGHA2_HUMAN]	88751	44	1	9	92.35	36.503	6.1001
P13646	Keratin, type I cytoskeletal 13 OS=Homo sapiens GN=KRT13 PE=1 SV=4 - [K1C13_HUMAN]	77545	107	2	79	85.81	49.5574	4.95752
P05164	Myeloperoxidase OS=Homo sapiens GN=MPO PE=1 SV=1 - [PERM_HUMAN]	75716	65	2	58	64.3	83.8148	8.96826
P01833	Polymeric immunoglobulin receptor OS=Homo sapiens GN=PIGR PE=1 SV=4 - [PIGR_HUMAN]	62416	78	2	78	67.02	83.2317	5.74463
P59665	Neutrophil defensin 1 OS=Homo sapiens GN=DEFA1 PE=1 SV=1 - [DEF1_HUMAN]	56460	16	1	8	68.09	10.1942	6.99072
Q9UGM3	Deleted in malignant brain tumors 1 protein OS=Homo sapiens GN=DMBT1 PE=1 SV=2 - [DMBT1_HUMAN]	55611	83	2	82	55.37	260.569	5.43994
P02538	Keratin, type II cytoskeletal 6A OS=Homo sapiens GN=KRT6A PE=1 SV=3 - [K2C6A_HUMAN]	55120	114	1	11	80.85	60.0083	8.00146
P01860	Ig gamma-3 chain C region OS=Homo sapiens GN=IGHG3 PE=1 SV=2 - [IGHG3_HUMAN]	51898	31	1	9	76.66	41.2604	7.89893
P06702	Protein S100-A9 OS=Homo sapiens GN=S100A9 PE=1 SV=1 - [S10A9_HUMAN]	50217	26	3	26	100	13.2335	6.12549
P19013	Keratin, type II cytoskeletal 4 OS=Homo sapiens GN=KRT4 PE=1 SV=4 - [K2C4_HUMAN]	50082	119	1	96	88.2	57.2498	6.60986
P48668	Keratin, type II cytoskeletal 6C OS=Homo sapiens GN=KRT6C PE=1 SV=3 - [K2C6C_HUMAN]	49596	110	1	6	78.9	59.9883	8.00146
P05109	Protein S100-A8 OS=Homo sapiens GN=S100A8 PE=1 SV=1 - [S10A8_HUMAN]	49580	26	2	26	100	10.8276	7.03467
P59666	Neutrophil defensin 3 OS=Homo sapiens GN=DEFA3 PE=1 SV=1 - [DEF3_HUMAN]	45672	10	1	2	61.7	10.2382	5.98584
P01859	Ig gamma-2 chain C region OS=Homo sapiens GN=IGHG2 PE=1 SV=2 - [IGHG2_HUMAN]	43925	31	3	17	77.3	35.8778	7.59131
P04259	Keratin, type II cytoskeletal 6B OS=Homo sapiens GN=KRT6B PE=1 SV=5 - [K2C6B_HUMAN]	42955	106	1	3	78.9	60.0303	8.00146
P01861	Ig gamma-4 chain C region OS=Homo sapiens GN=IGHG4 PE=1 SV=1 - [IGHG4_HUMAN]	38128	20	1	10	67.58	35.9179	7.35693
P0CG05	Ig lambda-2 chain C regions OS=Homo sapiens GN=IGLC2 PE=1 SV=1 - [LAC2_HUMAN]	38121	17	4	6	96.23	11.2865	7.23975
P01009	Alpha-1-antitrypsin OS=Homo sapiens GN=SERPINA1 PE=1 SV=3 - [A1AT_HUMAN]	36716	49	1	48	69.62	46.707	5.59229
P13647	Keratin, type II cytoskeletal 5 OS=Homo sapiens GN=KRT5 PE=1 SV=3 - [K2C5_HUMAN]	34365	91	1	51	77.8	62.34	7.73779
B9A064	Immunoglobulin lambda-like polypeptide 5 OS=Homo sapiens GN=IGLL5 PE=2 SV=2 - [IGLL5_HUMAN]	32811	18	3	7	55.14	23.0486	8.83643
Q9Y6R7	IgGFc-binding protein OS=Homo sapiens GN=FCGBP PE=1 SV=3 - [FCGBP_HUMAN]	30404	135	1	135	54.34	571.639	5.33838
P12273	Prolactin-inducible protein OS=Homo sapiens GN=PIP PE=1 SV=1 - [PIP_HUMAN]	29537	16	1	16	77.4	16.5618	8.04541
P98088	Mucin-5AC OS=Homo sapiens GN=MUC5AC PE=1 SV=4 - [MUC5A_HUMAN]	28554	136	1	127	36.82	585.199	7.02002
P08311	Cathepsin G OS=Homo sapiens GN=CTSG PE=1 SV=2 - [CATG_HUMAN]	28332	27	1	27	65.49	28.8191	11.1948
P02787	Serotransferrin OS=Homo sapiens GN=TF PE=1 SV=3 - [TRFE_HUMAN]	25767	80	1	78	89.54	77.0136	7.12256
P04083	Annexin A1 OS=Homo sapiens GN=ANXA1 PE=1 SV=2 - [ANXA1_HUMAN]	25632	45	1	45	81.79	38.69	7.02002
P80188	Neutrophil gelatinase-associated lipocalin OS=Homo sapiens GN=LCN2 PE=1 SV=2 - [NGAL_HUMAN]	25414	21	1	21	84.85	22.5737	8.90967
P01037	Cystatin-SN OS=Homo sapiens GN=CST1 PE=1 SV=3 - [CYTN_HUMAN]	24312	15	1	10	65.96	16.3773	7.21045
P01871	Ig mu chain C region OS=Homo sapiens GN=IGHM PE=1 SV=3 - [IGHM_HUMAN]	24096	29	2	14	63.94	49.2755	6.771
P31025	Lipocalin-1 OS=Homo sapiens GN=LCN1 PE=1 SV=1 - [LCN1_HUMAN]	23564	33	1	30	81.25	19.2378	5.57959
Q9NP55	BPI fold-containing family A member 1 OS=Homo sapiens GN=BPIFA1 PE=1 SV=1 - [BPIA1_HUMAN]	22694	26	1	26	60.16	26.6959	5.75732
P08779	Keratin, type I cytoskeletal 16 OS=Homo sapiens GN=KRT16 PE=1 SV=4 - [K1C16_HUMAN]	22407	65	1	32	83.09	51.2362	5.04639
P01024	Complement C3 OS=Homo sapiens GN=C3 PE=1 SV=2 - [CO3_HUMAN]	21878	129	4	127	79.62	187.03	6.40479
P01036	Cystatin-S OS=Homo sapiens GN=CST4 PE=1 SV=3 - [CYTS_HUMAN]	21601	19	2	12	76.6	16.204	5.021
P60709	Actin, cytoplasmic 1 OS=Homo sapiens GN=ACTB PE=1 SV=1 - [ACTB_HUMAN]	21554	47	3	18	80.27	41.7097	5.47803
P00738	Haptoglobin OS=Homo sapiens GN=HP PE=1 SV=1 - [HPT_HUMAN]	20205	50	4	34	85.71	45.1766	6.58057
P08727	Keratin, type I cytoskeletal 19 OS=Homo sapiens GN=KRT19 PE=1 SV=4 - [K1C19_HUMAN]	19436	37	1	19	74.75	44.0791	5.13525
P01023	Alpha-2-macroglobulin OS=Homo sapiens GN=A2M PE=1 SV=3 - [A2MG_HUMAN]	19411	90	1	82	69.27	163.188	6.45557
P02533	Keratin, type I cytoskeletal 14 OS=Homo sapiens GN=KRT14 PE=1 SV=4 - [K1C14_HUMAN]	18888	65	1	18	82.84	51.5294	5.16064
P25311	Zinc-alpha-2-glycoprotein OS=Homo sapiens GN=AZGP1 PE=1 SV=2 - [ZA2G_HUMAN]	18617	34	1	34	67.11	34.2371	6.04932
P19012	Keratin, type I cytoskeletal 15 OS=Homo sapiens GN=KRT15 PE=1 SV=3 - [K1C15_HUMAN]	18561	39	1	14	61.18	49.1811	4.76709
P08246	Neutrophil elastase OS=Homo sapiens GN=ELANE PE=1 SV=1 - [ELNE_HUMAN]	15794	18	1	18	67.42	28.4998	9.34912
Q96DA0	Zymogen granule protein 16 homolog B OS=Homo sapiens GN=ZG16B PE=1 SV=3 - [ZG16B_HUMAN]	15663	25	1	25	66.83	22.7246	7.38623
P01591	Immunoglobulin J chain OS=Homo sapiens GN=JCHAIN PE=1 SV=4 - [IGJ_HUMAN]	15338	17	2	17	74.84	18.087	5.23682
Q8N4F0	BPI fold-containing family B member 2 OS=Homo sapiens GN=BPIFB2 PE=1 SV=2 - [BPIB2_HUMAN]	14447	29	3	29	48.47	49.1417	8.71924
P62805	Histone H4 OS=Homo sapiens GN=HIST1H4A PE=1 SV=2 - [H4_HUMAN]	14040	14	1	14	59.22	11.3604	11.356
P19961	Alpha-amylase 2B OS=Homo sapiens GN=AMY2B PE=1 SV=1 - [AMY2B_HUMAN]	13643	36	1	5	82.78	57.673	7.09326
P35908	Keratin, type II cytoskeletal 2 epidermal OS=Homo sapiens GN=KRT2 PE=1 SV=2 - [K22E_HUMAN]	13289	53	1	30	73.24	65.3932	8.00146
P68871	Hemoglobin subunit beta OS=Homo sapiens GN=HBB PE=1 SV=2 - [HBB_HUMAN]	12015	14	2	8	84.35	15.9883	7.28369
P30740	Leukocyte elastase inhibitor OS=Homo sapiens GN=SERPINB1 PE=1 SV=1 - [ILEU_HUMAN]	11917	28	1	27	63.85	42.7147	6.27783
P20160	Azurocidin OS=Homo sapiens GN=AZU1 PE=1 SV=3 - [CAP7_HUMAN]	11350	11	1	11	56.57	26.8687	9.49561
P03973	Antileukoproteinase OS=Homo sapiens GN=SLPI PE=1 SV=2 - [SLPI_HUMAN]	10645	20	1	20	75.76	14.3159	8.74854
P58876	Histone H2B type 1-D OS=Homo sapiens GN=HIST1H2BD PE=1 SV=2 - [H2B1D_HUMAN]	10639	17	9	2	80.16	13.9276	10.3159
P11684	Uteroglobin OS=Homo sapiens GN=SCGB1A1 PE=1 SV=1 - [UTER_HUMAN]	10539	12	1	12	71.43	9.98708	5.05908
P01011	Alpha-1-antichymotrypsin OS=Homo sapiens GN=SERPINA3 PE=1 SV=2 - [AACT_HUMAN]	10291	32	1	32	63.59	47.6205	5.51611
P13796	Plastin-2 OS=Homo sapiens GN=LCP1 PE=1 SV=6 - [PLSL_HUMAN]	10190	47	2	40	78.47	70.2439	5.42725
P13645	Keratin, type I cytoskeletal 10 OS=Homo sapiens GN=KRT10 PE=1 SV=6 - [K1C10_HUMAN]	9388	48	1	34	66.78	58.7917	5.21143
P09228	Cystatin-SA OS=Homo sapiens GN=CST2 PE=1 SV=1 - [CYTT_HUMAN]	9388	13	1	9	69.5	16.4342	4.93213
Q04695	Keratin, type I cytoskeletal 17 OS=Homo sapiens GN=KRT17 PE=1 SV=2 - [K1C17_HUMAN]	8998	47	1	20	84.26	48.076	5.021
P00739	Haptoglobin-related protein OS=Homo sapiens GN=HPR PE=2 SV=2 - [HPTR_HUMAN]	8857	22	4	4	48.85	39.0047	7.09326
Q6P5S2	Protein LEG1 homolog OS=Homo sapiens GN=LEG1 PE=1 SV=2 - [LEG1H_HUMAN]	8708	25	1	24	68.48	37.9016	6.15088
P01623	Ig kappa chain V-III region WOL OS=Homo sapiens PE=1 SV=1 - [KV305_HUMAN]	8621	11	1	2	77.06	11.7389	8.90967
P02675	Fibrinogen beta chain OS=Homo sapiens GN=FGB PE=1 SV=2 - [FIBB_HUMAN]	8487	49	2	49	73.52	55.8923	8.26514
Q01546	Keratin, type II cytoskeletal 2 oral OS=Homo sapiens GN=KRT76 PE=1 SV=2 - [K22O_HUMAN]	8345	60	1	30	68.5	65.8001	8.11865
P04264	Keratin, type II cytoskeletal 1 OS=Homo sapiens GN=KRT1 PE=1 SV=6 - [K2C1_HUMAN]	7919	61	1	44	70.65	65.999	8.11865
A0M8Q6	Ig lambda-7 chain C region OS=Homo sapiens GN=IGLC7 PE=4 SV=2 - [LAC7_HUMAN]	7871	7	1	3	81.13	11.2956	8.27979
P12429	Annexin A3 OS=Homo sapiens GN=ANXA3 PE=1 SV=3 - [ANXA3_HUMAN]	7501	34	1	34	80.19	36.3527	5.92236
P02679	Fibrinogen gamma chain OS=Homo sapiens GN=FGG PE=1 SV=3 - [FIBG_HUMAN]	7489	37	1	37	64.24	51.4789	5.61768
P12035	Keratin, type II cytoskeletal 3 OS=Homo sapiens GN=KRT3 PE=1 SV=3 - [K2C3_HUMAN]	7045	59	1	18	65.13	64.3776	6.48096
P00450	Ceruloplasmin OS=Homo sapiens GN=CP PE=1 SV=1 - [CERU_HUMAN]	6666	55	1	55	57.09	122.128	5.71924
Q96KK5	Histone H2A type 1-H OS=Homo sapiens GN=HIST1H2AH PE=1 SV=3 - [H2A1H_HUMAN]	6272	15	4	2	64.06	13.8978	10.8872
P23280	Carbonic anhydrase 6 OS=Homo sapiens GN=CA6 PE=1 SV=3 - [CAH6_HUMAN]	6261	29	1	29	79.22	35.3446	7.02002
P02790	Hemopexin OS=Homo sapiens GN=HPX PE=1 SV=2 - [HEMO_HUMAN]	6161	31	2	31	71.86	51.6433	7.02002
P11678	Eosinophil peroxidase OS=Homo sapiens GN=EPX PE=1 SV=2 - [PERE_HUMAN]	6147	49	1	42	55.52	80.9891	10.2866
P22079	Lactoperoxidase OS=Homo sapiens GN=LPO PE=1 SV=2 - [PERL_HUMAN]	6068	44	1	44	59.97	80.2369	8.6167
Q16777	Histone H2A type 2-C OS=Homo sapiens GN=HIST2H2AC PE=1 SV=4 - [H2A2C_HUMAN]	6047	14	2	2	63.57	13.9798	10.9019
P69905	Hemoglobin subunit alpha OS=Homo sapiens GN=HBA1 PE=1 SV=2 - [HBA_HUMAN]	5971	13	2	13	91.55	15.2479	8.67529
P14780	Matrix metalloproteinase-9 OS=Homo sapiens GN=MMP9 PE=1 SV=3 - [MMP9_HUMAN]	5344	39	3	39	60.11	78.4084	6.06201
P02763	Alpha-1-acid glycoprotein 1 OS=Homo sapiens GN=ORM1 PE=1 SV=1 - [A1AG1_HUMAN]	5296	15	1	11	48.26	23.4968	5.021
Q08188	Protein-glutamine gamma-glutamyltransferase E OS=Homo sapiens GN=TGM3 PE=1 SV=4 - [TGM3_HUMAN]	4964	44	1	44	67.68	76.5836	5.85889
P12814	Alpha-actinin-1 OS=Homo sapiens GN=ACTN1 PE=1 SV=2 - [ACTN1_HUMAN]	4944	58	1	36	72.31	102.993	5.41455
P80748	Ig lambda chain V-III region LOI OS=Homo sapiens PE=1 SV=1 - [LV302_HUMAN]	4906	7	1	4	52.25	11.9278	5.08447
P29401	Transketolase OS=Homo sapiens GN=TKT PE=1 SV=3 - [TKT_HUMAN]	4895	35	5	35	57.14	67.8347	7.66455
O43707	Alpha-actinin-4 OS=Homo sapiens GN=ACTN4 PE=1 SV=2 - [ACTN4_HUMAN]	4486	55	1	32	70.03	104.788	5.43994
P07355	Annexin A2 OS=Homo sapiens GN=ANXA2 PE=1 SV=2 - [ANXA2_HUMAN]	4404	36	2	36	82.6	38.5798	7.75244
P01780	Immunoglobulin heavy variable 3-7 OS=Homo sapiens GN=IGHV3-7 PE=1 SV=2 - [HV307_HUMAN]	4293	16	2	5	63.25	12.9344	6.56592
P06396	Gelsolin OS=Homo sapiens GN=GSN PE=1 SV=1 - [GELS_HUMAN]	4199	44	1	44	59.59	85.6442	6.27783
P04406	Glyceraldehyde-3-phosphate dehydrogenase OS=Homo sapiens GN=GAPDH PE=1 SV=3 - [G3P_HUMAN]	4172	31	1	30	90.45	36.0304	8.45557
P0C0L5	Complement C4-B OS=Homo sapiens GN=C4B PE=1 SV=2 - [CO4B_HUMAN]	4108	83	1	11	53.15	192.631	7.26904
P27105	Erythrocyte band 7 integral membrane protein OS=Homo sapiens GN=STOM PE=1 SV=3 - [STOM_HUMAN]	4058	20	2	20	70.83	31.7107	7.88428
Q08380	Galectin-3-binding protein OS=Homo sapiens GN=LGALS3BP PE=1 SV=1 - [LG3BP_HUMAN]	3947	23	1	23	47.69	65.2893	5.2749
P07737	Profilin-1 OS=Homo sapiens GN=PFN1 PE=1 SV=2 - [PROF1_HUMAN]	3798	12	1	12	73.57	15.0446	8.26514
Q16378	Proline-rich protein 4 OS=Homo sapiens GN=PRR4 PE=1 SV=3 - [PROL4_HUMAN]	3753	8	1	8	35.82	15.0876	7.06396
P24158	Myeloblastin OS=Homo sapiens GN=PRTN3 PE=1 SV=3 - [PRTN3_HUMAN]	3686	10	1	9	42.19	27.7893	8.35303
P02042	Hemoglobin subunit delta OS=Homo sapiens GN=HBD PE=1 SV=2 - [HBD_HUMAN]	3629	14	2	8	89.8	16.0453	8.04541
P63104	14-3-3 protein zeta/delta OS=Homo sapiens GN=YWHAZ PE=1 SV=1 - [1433Z_HUMAN]	3618	20	1	14	62.86	27.7277	4.79248
Q8N1N4	Keratin, type II cytoskeletal 78 OS=Homo sapiens GN=KRT78 PE=2 SV=2 - [K2C78_HUMAN]	3585	50	1	39	76.73	56.8305	6.02393
Q96DR5	BPI fold-containing family A member 2 OS=Homo sapiens GN=BPIFA2 PE=1 SV=2 - [BPIA2_HUMAN]	3578	20	1	20	63.05	26.9947	5.59229
P06733	Alpha-enolase OS=Homo sapiens GN=ENO1 PE=1 SV=2 - [ENOA_HUMAN]	3543	33	2	28	76.73	47.1393	7.38623
P11215	Integrin alpha-M OS=Homo sapiens GN=ITGAM PE=1 SV=2 - [ITAM_HUMAN]	3293	46	2	45	43.49	127.099	7.2251
P28676	Grancalcin OS=Homo sapiens GN=GCA PE=1 SV=2 - [GRAN_HUMAN]	3208	14	1	14	68.2	23.9945	5.21143
P01609	Ig kappa chain V-I region Scw OS=Homo sapiens PE=1 SV=1 - [KV117_HUMAN]	3167	6	3	2	44.44	11.7568	5.99854
P04080	Cystatin-B OS=Homo sapiens GN=CSTB PE=1 SV=2 - [CYTB_HUMAN]	3089	8	1	8	82.65	11.1326	7.56201
P12724	Eosinophil cationic protein OS=Homo sapiens GN=RNASE3 PE=1 SV=2 - [ECP_HUMAN]	3076	11	1	11	47.5	18.3733	10.0229
P02814	Submaxillary gland androgen-regulated protein 3B OS=Homo sapiens GN=SMR3B PE=1 SV=2 - [SMR3B_HUMAN]	3062	9	3	9	65.82	8.18226	9.56885
P20061	Transcobalamin-1 OS=Homo sapiens GN=TCN1 PE=1 SV=2 - [TCO1_HUMAN]	3037	15	1	15	41.34	48.176	5.03369
P04217	Alpha-1B-glycoprotein OS=Homo sapiens GN=A1BG PE=1 SV=4 - [A1BG_HUMAN]	2998	15	1	15	43.23	54.2195	5.85889
P17213	Bactericidal permeability-increasing protein OS=Homo sapiens GN=BPI PE=1 SV=4 - [BPI_HUMAN]	2958	26	1	26	62.22	53.8651	9.37842
P15924	Desmoplakin OS=Homo sapiens GN=DSP PE=1 SV=3 - [DESP_HUMAN]	2869	157	1	157	54.72	331.569	6.81494
P05155	Plasma protease C1 inhibitor OS=Homo sapiens GN=SERPING1 PE=1 SV=2 - [IC1_HUMAN]	2848	21	1	21	38.2	55.1194	6.55127
P08670	Vimentin OS=Homo sapiens GN=VIM PE=1 SV=4 - [VIME_HUMAN]	2832	48	3	42	74.89	53.6191	5.12256
P60174	Triosephosphate isomerase OS=Homo sapiens GN=TPI1 PE=1 SV=3 - [TPIS_HUMAN]	2817	20	4	20	79.37	30.7717	5.92236
P05107	Integrin beta-2 OS=Homo sapiens GN=ITGB2 PE=1 SV=2 - [ITB2_HUMAN]	2809	36	7	36	51.24	84.7261	6.94678
P07988	Pulmonary surfactant-associated protein B OS=Homo sapiens GN=SFTPB PE=1 SV=3 - [PSPB_HUMAN]	2796	14	1	14	40.16	42.0889	5.49072
Q9UBC9	Small proline-rich protein 3 OS=Homo sapiens GN=SPRR3 PE=1 SV=2 - [SPRR3_HUMAN]	2782	36	1	36	93.49	18.1422	8.57275
Q7Z794	Keratin, type II cytoskeletal 1b OS=Homo sapiens GN=KRT77 PE=2 SV=3 - [K2C1B_HUMAN]	2781	12	1	5	14.01	61.8635	5.98584
P02774	Vitamin D-binding protein OS=Homo sapiens GN=GC PE=1 SV=1 - [VTDB_HUMAN]	2767	33	1	33	75.53	52.929	5.5415
Q9NSB4	Keratin, type II cuticular Hb2 OS=Homo sapiens GN=KRT82 PE=3 SV=3 - [KRT82_HUMAN]	2741	3	1	2	3.7	56.6163	6.7417
Q9NSB2	Keratin, type II cuticular Hb4 OS=Homo sapiens GN=KRT84 PE=2 SV=2 - [KRT84_HUMAN]	2729	46	1	37	80.67	64.8015	7.56201
P0DMV9	Heat shock 70 kDa protein 1B OS=Homo sapiens GN=HSPA1B PE=1 SV=1 - [HS71B_HUMAN]	2655	39	4	21	74.41	70.009	5.65576
P0C0L4	Complement C4-A OS=Homo sapiens GN=C4A PE=1 SV=2 - [CO4A_HUMAN]	2643	77	1	5	50	192.664	7.07861
P18136	Ig kappa chain V-III region HIC OS=Homo sapiens PE=1 SV=2 - [KV313_HUMAN]	2639	13	2	2	79.07	14.0801	6.59521
P11142	Heat shock cognate 71 kDa protein OS=Homo sapiens GN=HSPA8 PE=1 SV=1 - [HSP7C_HUMAN]	2630	44	23	31	68.58	70.8542	5.51611
P04206	Ig kappa chain V-III region GOL OS=Homo sapiens PE=1 SV=1 - [KV307_HUMAN]	2611	7	1	3	69.72	11.823	9.24658
P35579	Myosin-9 OS=Homo sapiens GN=MYH9 PE=1 SV=4 - [MYH9_HUMAN]	2581	117	3	105	56.38	226.392	5.60498
P31949	Protein S100-A11 OS=Homo sapiens GN=S100A11 PE=1 SV=2 - [S10AB_HUMAN]	2574	9	1	9	86.67	11.7328	7.12256
P06744	Glucose-6-phosphate isomerase OS=Homo sapiens GN=GPI PE=1 SV=4 - [G6PI_HUMAN]	2553	31	5	31	61.83	63.1072	8.32373
P08758	Annexin A5 OS=Homo sapiens GN=ANXA5 PE=1 SV=2 - [ANXA5_HUMAN]	2530	23	1	23	75.63	35.9144	5.04639
P00751	Complement factor B OS=Homo sapiens GN=CFB PE=1 SV=2 - [CFAB_HUMAN]	2529	38	1	38	49.08	85.4785	7.06396
P62937	Peptidyl-prolyl cis-trans isomerase A OS=Homo sapiens GN=PPIA PE=1 SV=2 - [PPIA_HUMAN]	2507	12	6	12	78.79	18.0009	7.81104
P68371	Tubulin beta-4B chain OS=Homo sapiens GN=TUBB4B PE=1 SV=1 - [TBB4B_HUMAN]	2490	26	2	6	68.99	49.799	4.89404
A8K2U0	Alpha-2-macroglobulin-like protein 1 OS=Homo sapiens GN=A2ML1 PE=1 SV=3 - [A2ML1_HUMAN]	2476	52	1	51	42.43	161.004	5.73193
Q07654	Trefoil factor 3 OS=Homo sapiens GN=TFF3 PE=1 SV=1 - [TFF3_HUMAN]	2468	14	1	14	67.5	8.63508	5.92236
P04746	Pancreatic alpha-amylase OS=Homo sapiens GN=AMY2A PE=1 SV=2 - [AMYP_HUMAN]	2466	29	1	4	66.34	57.67	7.04932
P01622	Ig kappa chain V-III region Ti OS=Homo sapiens PE=1 SV=1 - [KV304_HUMAN]	2425	8	1	2	76.15	11.7809	8.49951
P01033	Metalloproteinase inhibitor 1 OS=Homo sapiens GN=TIMP1 PE=1 SV=1 - [TIMP1_HUMAN]	2420	8	1	8	57.49	23.1555	8.104
P15311	Ezrin OS=Homo sapiens GN=EZR PE=1 SV=4 - [EZRI_HUMAN]	2359	39	1	25	57.68	69.3697	6.26514
P08133	Annexin A6 OS=Homo sapiens GN=ANXA6 PE=1 SV=3 - [ANXA6_HUMAN]	2345	44	2	44	67.01	75.8256	5.60498
P04040	Catalase OS=Homo sapiens GN=CAT PE=1 SV=3 - [CATA_HUMAN]	2334	38	1	38	67.93	59.7188	7.38623
P22532	Small proline-rich protein 2D OS=Homo sapiens GN=SPRR2D PE=2 SV=2 - [SPR2D_HUMAN]	2297	6	1	3	79.17	7.89962	8.36768
P02671	Fibrinogen alpha chain OS=Homo sapiens GN=FGA PE=1 SV=2 - [FIBA_HUMAN]	2251	26	1	26	27.37	94.9144	6.01123
Q14508	WAP four-disulfide core domain protein 2 OS=Homo sapiens GN=WFDC2 PE=1 SV=2 - [WFDC2_HUMAN]	2188	6	1	6	45.16	12.9839	4.84326
P54108	Cysteine-rich secretory protein 3 OS=Homo sapiens GN=CRISP3 PE=1 SV=1 - [CRIS3_HUMAN]	2159	22	1	22	66.53	27.612	7.79639
P01764	Immunoglobulin heavy variable 3-23 OS=Homo sapiens GN=IGHV3-23 PE=1 SV=2 - [HV323_HUMAN]	2143	13	1	2	66.67	12.5742	8.27979
P01772	Immunoglobulin heavy variable 3-33 OS=Homo sapiens GN=IGHV3-33 PE=1 SV=2 - [HV333_HUMAN]	2141	9	4	4	62.39	13.0655	8.93896
Q86Y46	Keratin, type II cytoskeletal 73 OS=Homo sapiens GN=KRT73 PE=1 SV=1 - [K2C73_HUMAN]	2101	15	1	2	21.48	58.8867	7.2251
P31947	14-3-3 protein sigma OS=Homo sapiens GN=SFN PE=1 SV=1 - [1433S_HUMAN]	2099	21	1	16	79.44	27.7567	4.7417
Q9HD89	Resistin OS=Homo sapiens GN=RETN PE=1 SV=1 - [RETN_HUMAN]	2083	6	1	6	76.85	11.4115	6.85889
P68431	Histone H3.1 OS=Homo sapiens GN=HIST1H3A PE=1 SV=2 - [H31_HUMAN]	2080	11	5	2	62.5	15.3945	11.1216
P61769	Beta-2-microglobulin OS=Homo sapiens GN=B2M PE=1 SV=1 - [B2MG_HUMAN]	2058	10	1	10	78.15	13.7059	6.52197
P01613	Ig kappa chain V-I region Ni OS=Homo sapiens PE=1 SV=1 - [KV121_HUMAN]	2054	3	2	3	30.36	12.238	5.36377
P09211	Glutathione S-transferase P OS=Homo sapiens GN=GSTP1 PE=1 SV=2 - [GSTP1_HUMAN]	2010	14	2	14	89.52	23.341	5.64307
P07437	Tubulin beta chain OS=Homo sapiens GN=TUBB PE=1 SV=2 - [TBB5_HUMAN]	1984	25	2	5	72.97	49.639	4.89404
P01608	Ig kappa chain V-I region Roy OS=Homo sapiens PE=1 SV=1 - [KV116_HUMAN]	1951	6	3	4	61.11	11.7748	5.36377
Q8IUE6	Histone H2A type 2-B OS=Homo sapiens GN=HIST2H2AB PE=1 SV=3 - [H2A2B_HUMAN]	1930	9	1	3	70	13.9868	10.8872
Q562R1	Beta-actin-like protein 2 OS=Homo sapiens GN=ACTBL2 PE=1 SV=2 - [ACTBL_HUMAN]	1915	17	1	4	30.05	41.976	5.59229
P62987	Ubiquitin-60S ribosomal protein L40 OS=Homo sapiens GN=UBA52 PE=1 SV=2 - [RL40_HUMAN]	1890	7	4	7	46.09	14.719	9.83252
P01767	Immunoglobulin heavy variable 3-53 OS=Homo sapiens GN=IGHV3-53 PE=1 SV=2 - [HV353_HUMAN]	1889	8	4	2	50.86	12.7613	8.27979
P02647	Apolipoprotein A-I OS=Homo sapiens GN=APOA1 PE=1 SV=1 - [APOA1_HUMAN]	1871	35	1	35	81.27	30.7589	5.75732
P26038	Moesin OS=Homo sapiens GN=MSN PE=1 SV=3 - [MOES_HUMAN]	1869	46	1	34	62.39	67.7778	6.40479
P11021	78 kDa glucose-regulated protein OS=Homo sapiens GN=HSPA5 PE=1 SV=2 - [GRP78_HUMAN]	1863	36	2	33	51.99	72.2884	5.16064
P68104	Elongation factor 1-alpha 1 OS=Homo sapiens GN=EEF1A1 PE=1 SV=1 - [EF1A1_HUMAN]	1862	22	5	22	48.92	50.1091	9.01221
P28325	Cystatin-D OS=Homo sapiens GN=CST5 PE=1 SV=1 - [CYTD_HUMAN]	1845	10	31	10	71.83	16.0699	7.1665
O75594	Peptidoglycan recognition protein 1 OS=Homo sapiens GN=PGLYRP1 PE=1 SV=1 - [PGRP1_HUMAN]	1843	8	1	8	57.14	21.7167	8.5874
Q8IWL1	Pulmonary surfactant-associated protein A2 OS=Homo sapiens GN=SFTPA2 PE=1 SV=1 - [SFPA2_HUMAN]	1798	10	2	10	49.19	26.1656	5.17334
P01594	Ig kappa chain V-I region AU OS=Homo sapiens PE=1 SV=1 - [KV102_HUMAN]	1783	6	3	3	53.7	11.9318	5.32568
O00391	Sulfhydryl oxidase 1 OS=Homo sapiens GN=QSOX1 PE=1 SV=3 - [QSOX1_HUMAN]	1782	35	1	35	45.65	82.5255	8.92432
Q8TAX7	Mucin-7 OS=Homo sapiens GN=MUC7 PE=1 SV=2 - [MUC7_HUMAN]	1759	17	1	17	19.36	39.1347	8.77783
P14923	Junction plakoglobin OS=Homo sapiens GN=JUP PE=1 SV=3 - [PLAK_HUMAN]	1728	36	1	31	58.52	81.6927	6.13818
P13727	Bone marrow proteoglycan OS=Homo sapiens GN=PRG2 PE=1 SV=2 - [PRG2_HUMAN]	1707	9	1	9	39.19	25.1893	6.75635
P49913	Cathelicidin antimicrobial peptide OS=Homo sapiens GN=CAMP PE=1 SV=1 - [CAMP_HUMAN]	1701	13	1	13	55.29	19.2892	9.40771
P06331	Immunoglobulin heavy variable 4-34 OS=Homo sapiens GN=IGHV4-34 PE=1 SV=2 - [HV434_HUMAN]	1675	9	6	7	43.9	13.8061	9.33447
P07602	Prosaposin OS=Homo sapiens GN=PSAP PE=1 SV=2 - [SAP_HUMAN]	1667	19	1	19	43.89	58.0739	5.17334
P05787	Keratin, type II cytoskeletal 8 OS=Homo sapiens GN=KRT8 PE=1 SV=7 - [K2C8_HUMAN]	1648	33	1	16	45.96	53.6711	5.59229
Q01518	Adenylyl cyclase-associated protein 1 OS=Homo sapiens GN=CAP1 PE=1 SV=5 - [CAP1_HUMAN]	1643	26	2	26	60	51.8687	8.06006
P00338	L-lactate dehydrogenase A chain OS=Homo sapiens GN=LDHA PE=1 SV=2 - [LDHA_HUMAN]	1638	22	3	21	64.16	36.6654	8.26514
P37837	Transaldolase OS=Homo sapiens GN=TALDO1 PE=1 SV=2 - [TALDO_HUMAN]	1606	20	1	20	54.01	37.5165	6.81494
P25815	Protein S100-P OS=Homo sapiens GN=S100P PE=1 SV=2 - [S100P_HUMAN]	1585	9	1	9	86.32	10.3932	4.88135
P07339	Cathepsin D OS=Homo sapiens GN=CTSD PE=1 SV=1 - [CATD_HUMAN]	1569	17	1	17	43.2	44.5236	6.53662
P02751	Fibronectin OS=Homo sapiens GN=FN1 PE=1 SV=4 - [FINC_HUMAN]	1567	51	1	51	28.33	262.46	5.70654
P14618	Pyruvate kinase PKM OS=Homo sapiens GN=PKM PE=1 SV=4 - [KPYM_HUMAN]	1557	37	2	37	70.24	57.9	7.84033
P04792	Heat shock protein beta-1 OS=Homo sapiens GN=HSPB1 PE=1 SV=2 - [HSPB1_HUMAN]	1544	22	1	22	92.68	22.7685	6.40479
P01763	Immunoglobulin heavy variable 3-48 OS=Homo sapiens GN=IGHV3-48 PE=1 SV=2 - [HV348_HUMAN]	1533	13	2	2	52.14	12.8043	5.36377
O75556	Mammaglobin-B OS=Homo sapiens GN=SCGB2A1 PE=1 SV=1 - [SG2A1_HUMAN]	1508	6	1	6	70.53	10.8763	5.78271
O95678	Keratin, type II cytoskeletal 75 OS=Homo sapiens GN=KRT75 PE=1 SV=2 - [K2C75_HUMAN]	1505	21	1	5	29.95	59.524	7.73779
P22894	Neutrophil collagenase OS=Homo sapiens GN=MMP8 PE=1 SV=1 - [MMP8_HUMAN]	1493	16	1	16	42.18	53.3785	6.87354
P02749	Beta-2-glycoprotein 1 OS=Homo sapiens GN=APOH PE=1 SV=3 - [APOH_HUMAN]	1490	14	1	14	54.2	38.2727	7.97217
P16104	Histone H2AX OS=Homo sapiens GN=H2AFX PE=1 SV=2 - [H2AX_HUMAN]	1486	8	1	2	63.64	15.1354	10.7407
P07237	Protein disulfide-isomerase OS=Homo sapiens GN=P4HB PE=1 SV=3 - [PDIA1_HUMAN]	1456	38	1	38	72.64	57.0807	4.86865
P19652	Alpha-1-acid glycoprotein 2 OS=Homo sapiens GN=ORM2 PE=1 SV=2 - [A1AG2_HUMAN]	1451	12	1	8	46.77	23.5876	5.10986
P01034	Cystatin-C OS=Homo sapiens GN=CST3 PE=1 SV=1 - [CYTC_HUMAN]	1430	10	1	10	63.7	15.7891	8.74854
P04207	Ig kappa chain V-III region CLL OS=Homo sapiens PE=4 SV=2 - [KV308_HUMAN]	1425	6	1	4	39.53	14.2662	8.51416
P01607	Ig kappa chain V-I region Rei OS=Homo sapiens PE=1 SV=1 - [KV115_HUMAN]	1422	4	3	3	53.7	11.8948	6.50732
P46940	Ras GTPase-activating-like protein IQGAP1 OS=Homo sapiens GN=IQGAP1 PE=1 SV=1 - [IQGA1_HUMAN]	1394	45	2	44	35	189.134	6.48096
P35321	Cornifin-A OS=Homo sapiens GN=SPRR1A PE=1 SV=2 - [SPR1A_HUMAN]	1375	9	1	3	87.64	9.87088	8.48486
P01762	Immunoglobulin heavy variable 3-11 OS=Homo sapiens GN=IGHV3-11 PE=1 SV=2 - [HV311_HUMAN]	1349	10	1	3	41.88	12.9004	8.60205
Q71U36	Tubulin alpha-1A chain OS=Homo sapiens GN=TUBA1A PE=1 SV=1 - [TBA1A_HUMAN]	1328	21	4	2	54.77	50.1036	5.05908
Q06830	Peroxiredoxin-1 OS=Homo sapiens GN=PRDX1 PE=1 SV=1 - [PRDX1_HUMAN]	1327	16	1	12	66.83	22.0963	8.1333
P06309	Ig kappa chain V-II region GM607 (Fragment) OS=Homo sapiens PE=4 SV=1 - [KV205_HUMAN]	1325	7	3	3	47.86	12.6563	7.12256
P31146	Coronin-1A OS=Homo sapiens GN=CORO1A PE=1 SV=4 - [COR1A_HUMAN]	1324	28	1	28	58.79	50.9938	6.68311
P43490	Nicotinamide phosphoribosyltransferase OS=Homo sapiens GN=NAMPT PE=1 SV=1 - [NAMPT_HUMAN]	1321	20	4	20	45.01	55.4866	7.15186
P62158	Calmodulin OS=Homo sapiens GN=CALM1 PE=1 SV=2 - [CALM_HUMAN]	1294	7	2	5	50.34	16.8268	4.22119
P04208	Ig lambda chain V-I region WAH OS=Homo sapiens PE=1 SV=1 - [LV106_HUMAN]	1279	5	2	2	37.61	11.7177	6.53662
P06310	Ig kappa chain V-II region RPMI 6410 OS=Homo sapiens PE=4 SV=1 - [KV206_HUMAN]	1277	7	1	5	60.9	14.6974	9.24658
P04839	Cytochrome b-245 heavy chain OS=Homo sapiens GN=CYBB PE=1 SV=2 - [CY24B_HUMAN]	1250	19	2	17	39.82	65.2936	8.63135
P21333	Filamin-A OS=Homo sapiens GN=FLNA PE=1 SV=4 - [FLNA_HUMAN]	1248	58	1	56	29.39	280.564	6.06201
P01717	Ig lambda chain V-IV region Hil OS=Homo sapiens PE=1 SV=1 - [LV403_HUMAN]	1245	6	1	5	55.14	11.5096	6.50732
P50395	Rab GDP dissociation inhibitor beta OS=Homo sapiens GN=GDI2 PE=1 SV=2 - [GDIB_HUMAN]	1207	21	1	16	52.81	50.6309	6.46826
P02750	Leucine-rich alpha-2-glycoprotein OS=Homo sapiens GN=LRG1 PE=1 SV=2 - [A2GL_HUMAN]	1186	14	1	14	51.87	38.1541	6.94678
Q96QR1	Secretoglobin family 3A member 1 OS=Homo sapiens GN=SCGB3A1 PE=1 SV=2 - [SG3A1_HUMAN]	1151	3	1	3	31.73	10.0936	8.32373
Q9HDC9	Adipocyte plasma membrane-associated protein OS=Homo sapiens GN=APMAP PE=1 SV=2 - [APMAP_HUMAN]	1139	17	7	16	39.9	46.4509	6.16357
P10599	Thioredoxin OS=Homo sapiens GN=TXN PE=1 SV=3 - [THIO_HUMAN]	1137	11	1	11	87.62	11.7297	4.91943
P01008	Antithrombin-III OS=Homo sapiens GN=SERPINC1 PE=1 SV=1 - [ANT3_HUMAN]	1137	29	1	29	60.13	52.5689	6.7124
P17066	Heat shock 70 kDa protein 6 OS=Homo sapiens GN=HSPA6 PE=1 SV=2 - [HSP76_HUMAN]	1129	17	4	3	28.46	70.9842	6.13818
P31151	Protein S100-A7 OS=Homo sapiens GN=S100A7 PE=1 SV=4 - [S10A7_HUMAN]	1127	10	2	10	68.32	11.4636	6.771
P04075	Fructose-bisphosphate aldolase A OS=Homo sapiens GN=ALDOA PE=1 SV=2 - [ALDOA_HUMAN]	1126	26	2	22	79.67	39.3953	8.08936
P10909	Clusterin OS=Homo sapiens GN=CLU PE=1 SV=1 - [CLUS_HUMAN]	1122	23	1	23	45.66	52.461	6.26514
P22528	Cornifin-B OS=Homo sapiens GN=SPRR1B PE=1 SV=2 - [SPR1B_HUMAN]	1116	10	1	4	71.91	9.88093	8.48486
P80511	Protein S100-A12 OS=Homo sapiens GN=S100A12 PE=1 SV=2 - [S10AC_HUMAN]	1106	14	1	14	96.74	10.5685	6.25244
P08603	Complement factor H OS=Homo sapiens GN=CFH PE=1 SV=4 - [CFAH_HUMAN]	1104	43	1	41	48.9	139.005	6.60986
P06870	Kallikrein-1 OS=Homo sapiens GN=KLK1 PE=1 SV=2 - [KLK1_HUMAN]	1103	9	1	9	46.18	28.8709	4.83057
P04220	Ig mu heavy chain disease protein OS=Homo sapiens PE=1 SV=1 - [MUCB_HUMAN]	1082	16	1	4	51.66	43.0303	5.23682
P35527	Keratin, type I cytoskeletal 9 OS=Homo sapiens GN=KRT9 PE=1 SV=3 - [K1C9_HUMAN]	1075	27	1	26	58.27	62.0268	5.23682
P68366	Tubulin alpha-4A chain OS=Homo sapiens GN=TUBA4A PE=1 SV=1 - [TBA4A_HUMAN]	1066	19	3	5	49.78	49.8924	5.05908
P52209	6-phosphogluconate dehydrogenase, decarboxylating OS=Homo sapiens GN=PGD PE=1 SV=3 - [6PGD_HUMAN]	1063	27	1	26	64.8	53.106	7.2251
P04114	Apolipoprotein B-100 OS=Homo sapiens GN=APOB PE=1 SV=2 - [APOB_HUMAN]	1051	93	2	93	23.54	515.283	7.04932
P13929	Beta-enolase OS=Homo sapiens GN=ENO3 PE=1 SV=5 - [ENOB_HUMAN]	1050	7	2	2	19.82	46.9573	7.7085
P07900	Heat shock protein HSP 90-alpha OS=Homo sapiens GN=HSP90AA1 PE=1 SV=5 - [HS90A_HUMAN]	1042	29	3	18	43.03	84.6067	5.021
Q14CN4	Keratin, type II cytoskeletal 72 OS=Homo sapiens GN=KRT72 PE=1 SV=2 - [K2C72_HUMAN]	1035	15	1	3	16.05	55.8424	6.88818
P29508	Serpin B3 OS=Homo sapiens GN=SERPINB3 PE=1 SV=2 - [SPB3_HUMAN]	1025	26	1	15	69.23	44.5365	6.81494
Q9UBG3	Cornulin OS=Homo sapiens GN=CRNN PE=1 SV=1 - [CRNN_HUMAN]	1015	28	1	28	69.9	53.5016	6.1001
P31946	14-3-3 protein beta/alpha OS=Homo sapiens GN=YWHAB PE=1 SV=3 - [1433B_HUMAN]	1008	17	1	9	63.01	28.0648	4.83057
P40926	Malate dehydrogenase, mitochondrial OS=Homo sapiens GN=MDH2 PE=1 SV=3 - [MDHM_HUMAN]	1003	17	1	17	63.61	35.4807	8.67529
P01714	Ig lambda chain V-III region SH OS=Homo sapiens PE=1 SV=1 - [LV301_HUMAN]	993	5	2	3	40.74	11.3856	6.52197
O75131	Copine-3 OS=Homo sapiens GN=CPNE3 PE=1 SV=1 - [CPNE3_HUMAN]	957	22	7	21	40.41	60.0921	5.84619
P04433	Ig kappa chain V-III region VG (Fragment) OS=Homo sapiens PE=1 SV=1 - [KV309_HUMAN]	951	8	2	4	73.91	12.5673	4.95752
P50995	Annexin A11 OS=Homo sapiens GN=ANXA11 PE=1 SV=1 - [ANX11_HUMAN]	933	23	1	23	44.16	54.3551	7.6499
P04211	Ig lambda chain V region 4A OS=Homo sapiens PE=4 SV=1 - [LV001_HUMAN]	927	4	3	3	27.35	12.372	7.03467
P36222	Chitinase-3-like protein 1 OS=Homo sapiens GN=CHI3L1 PE=1 SV=2 - [CH3L1_HUMAN]	926	16	1	16	49.61	42.5984	8.45557
P15153	Ras-related C3 botulinum toxin substrate 2 OS=Homo sapiens GN=RAC2 PE=1 SV=1 - [RAC2_HUMAN]	906	11	2	5	47.4	21.4151	7.60596
P08238	Heat shock protein HSP 90-beta OS=Homo sapiens GN=HSP90AB1 PE=1 SV=4 - [HS90B_HUMAN]	905	27	5	14	42.4	83.2121	5.03369
P01834	Immunoglobulin kappa constant OS=Homo sapiens GN=IGKC PE=1 SV=2 - [IGKC_HUMAN]	891	7	1	2	80.37	11.7578	6.52197
P0DOX5	Immunoglobulin gamma-1 heavy chain OS=Homo sapiens PE=1 SV=1 - [IGG1_HUMAN]	890	17	2	3	43.65	49.2992	8.71924
P37802	Transgelin-2 OS=Homo sapiens GN=TAGLN2 PE=1 SV=3 - [TAGL2_HUMAN]	885	14	1	14	67.34	22.3772	8.25049
Q7RTS7	Keratin, type II cytoskeletal 74 OS=Homo sapiens GN=KRT74 PE=1 SV=2 - [K2C74_HUMAN]	866	12	1	3	17.96	57.8296	7.7085
P0C0S5	Histone H2A.Z OS=Homo sapiens GN=H2AFZ PE=1 SV=2 - [H2AZ_HUMAN]	860	5	2	3	53.91	13.5446	10.5796
P04179	Superoxide dismutase [Mn], mitochondrial OS=Homo sapiens GN=SOD2 PE=1 SV=2 - [SODM_HUMAN]	829	10	24	10	43.24	24.7066	8.25049
P04004	Vitronectin OS=Homo sapiens GN=VTN PE=1 SV=1 - [VTNC_HUMAN]	828	10	1	10	25.73	54.2712	5.79541
P62258	14-3-3 protein epsilon OS=Homo sapiens GN=YWHAE PE=1 SV=1 - [1433E_HUMAN]	828	10	1	7	38.82	29.1554	4.7417
P30101	Protein disulfide-isomerase A3 OS=Homo sapiens GN=PDIA3 PE=1 SV=4 - [PDIA3_HUMAN]	822	22	1	22	46.14	56.7468	6.354
P36955	Pigment epithelium-derived factor OS=Homo sapiens GN=SERPINF1 PE=1 SV=4 - [PEDF_HUMAN]	810	20	1	20	50	46.2833	6.37939
P06312	Immunoglobulin kappa variable 4-1 OS=Homo sapiens GN=IGKV4-1 PE=1 SV=1 - [KV401_HUMAN]	806	7	4	6	51.24	13.3716	5.24951
O76013	Keratin, type I cuticular Ha6 OS=Homo sapiens GN=KRT36 PE=2 SV=1 - [KRT36_HUMAN]	803	31	2	27	70.45	52.214	4.94482
P09525	Annexin A4 OS=Homo sapiens GN=ANXA4 PE=1 SV=4 - [ANXA4_HUMAN]	792	17	1	17	52.35	35.8601	6.12549
P05141	ADP/ATP translocase 2 OS=Homo sapiens GN=SLC25A5 PE=1 SV=7 - [ADT2_HUMAN]	790	13	1	4	35.57	32.8312	9.68604
P04434	Ig kappa chain V-III region VH (Fragment) OS=Homo sapiens PE=4 SV=1 - [KV310_HUMAN]	787	4	1	2	42.24	12.7494	5.93506
P10153	Non-secretory ribonuclease OS=Homo sapiens GN=RNASE2 PE=1 SV=2 - [RNAS2_HUMAN]	768	5	1	5	21.74	18.3421	8.73389
Q6P4A8	Phospholipase B-like 1 OS=Homo sapiens GN=PLBD1 PE=1 SV=2 - [PLBL1_HUMAN]	765	18	1	18	34	63.2142	9.05615
P01880	Ig delta chain C region OS=Homo sapiens GN=IGHD PE=1 SV=2 - [IGHD_HUMAN]	764	13	1	10	50.78	42.2272	7.92822
P27348	14-3-3 protein theta OS=Homo sapiens GN=YWHAQ PE=1 SV=1 - [1433T_HUMAN]	763	12	1	5	43.67	27.7468	4.77979
P31997	Carcinoembryonic antigen-related cell adhesion molecule 8 OS=Homo sapiens GN=CEACAM8 PE=1 SV=2 - [CEAM8_HUMAN]	755	6	1	5	23.78	38.1301	7.38623
P06576	ATP synthase subunit beta, mitochondrial OS=Homo sapiens GN=ATP5B PE=1 SV=3 - [ATPB_HUMAN]	751	18	12	17	51.23	56.5246	5.40186
P22735	Protein-glutamine gamma-glutamyltransferase K OS=Homo sapiens GN=TGM1 PE=1 SV=4 - [TGM1_HUMAN]	751	22	1	22	33.17	89.7303	6.03662
P06703	Protein S100-A6 OS=Homo sapiens GN=S100A6 PE=1 SV=1 - [S10A6_HUMAN]	748	8	2	8	73.33	10.1733	5.47803
P0DOX2	Immunoglobulin alpha-2 heavy chain OS=Homo sapiens PE=1 SV=1 - [IGA2_HUMAN]	747	11	1	4	32.97	48.9042	6.81494
P18206	Vinculin OS=Homo sapiens GN=VCL PE=1 SV=4 - [VINC_HUMAN]	738	33	1	33	31.92	123.722	5.65576
P13639	Elongation factor 2 OS=Homo sapiens GN=EEF2 PE=1 SV=4 - [EF2_HUMAN]	728	31	1	30	42.77	95.277	6.82959
P05783	Keratin, type I cytoskeletal 18 OS=Homo sapiens GN=KRT18 PE=1 SV=2 - [K1C18_HUMAN]	728	8	1	6	18.84	48.0285	5.45264
P26447	Protein S100-A4 OS=Homo sapiens GN=S100A4 PE=1 SV=1 - [S10A4_HUMAN]	721	7	1	7	45.54	11.7207	6.11279
P08729	Keratin, type II cytoskeletal 7 OS=Homo sapiens GN=KRT7 PE=1 SV=5 - [K2C7_HUMAN]	721	14	1	4	19.62	51.3543	5.47803
P60660	Myosin light polypeptide 6 OS=Homo sapiens GN=MYL6 PE=1 SV=2 - [MYL6_HUMAN]	710	8	2	7	58.28	16.9191	4.65283
P0DOX7	Immunoglobulin kappa light chain OS=Homo sapiens PE=1 SV=1 - [IGK_HUMAN]	707	8	2	3	53.74	23.3644	7.1665
P27797	Calreticulin OS=Homo sapiens GN=CALR PE=1 SV=1 - [CALR_HUMAN]	664	21	1	21	60.43	48.1118	4.43701
P01040	Cystatin-A OS=Homo sapiens GN=CSTA PE=1 SV=1 - [CYTA_HUMAN]	661	9	1	9	94.9	10.9997	5.50342
P17931	Galectin-3 OS=Homo sapiens GN=LGALS3 PE=1 SV=5 - [LEG3_HUMAN]	659	9	1	9	34.4	26.1361	8.55811
Q13835	Plakophilin-1 OS=Homo sapiens GN=PKP1 PE=1 SV=2 - [PKP1_HUMAN]	657	32	1	32	53.01	82.8078	9.12939
P04003	C4b-binding protein alpha chain OS=Homo sapiens GN=C4BPA PE=1 SV=2 - [C4BPA_HUMAN]	648	23	1	23	47.24	66.9894	7.29834
O00299	Chloride intracellular channel protein 1 OS=Homo sapiens GN=CLIC1 PE=1 SV=4 - [CLIC1_HUMAN]	647	11	1	11	40.66	26.9057	5.17334
P00915	Carbonic anhydrase 1 OS=Homo sapiens GN=CA1 PE=1 SV=2 - [CAH1_HUMAN]	641	7	1	7	36.4	28.8524	7.12256
Q14651	Plastin-1 OS=Homo sapiens GN=PLS1 PE=1 SV=2 - [PLSI_HUMAN]	640	8	1	2	11.76	70.2093	5.41455
P04350	Tubulin beta-4A chain OS=Homo sapiens GN=TUBB4A PE=1 SV=2 - [TBB4A_HUMAN]	637	15	2	2	40.09	49.5539	4.88135
P02748	Complement component C9 OS=Homo sapiens GN=C9 PE=1 SV=2 - [CO9_HUMAN]	622	13	1	13	30.05	63.1327	5.59229
Q01469	Fatty acid-binding protein, epidermal OS=Homo sapiens GN=FABP5 PE=1 SV=3 - [FABP5_HUMAN]	614	11	2	11	70.37	15.1546	7.00537
P61026	Ras-related protein Rab-10 OS=Homo sapiens GN=RAB10 PE=1 SV=1 - [RAB10_HUMAN]	613	7	15	5	37.5	22.5266	8.38232
O60635	Tetraspanin-1 OS=Homo sapiens GN=TSPAN1 PE=1 SV=2 - [TSN1_HUMAN]	605	3	1	3	10.79	26.2832	5.24951
Q9HCY8	Protein S100-A14 OS=Homo sapiens GN=S100A14 PE=1 SV=1 - [S10AE_HUMAN]	602	10	2	10	93.27	11.6548	5.23682
O60437	Periplakin OS=Homo sapiens GN=PPL PE=1 SV=4 - [PEPL_HUMAN]	601	57	1	57	32.92	204.623	5.60498
Q6UX06	Olfactomedin-4 OS=Homo sapiens GN=OLFM4 PE=1 SV=1 - [OLFM4_HUMAN]	590	15	1	15	40	57.2438	5.69385
P07098	Gastric triacylglycerol lipase OS=Homo sapiens GN=LIPF PE=1 SV=1 - [LIPG_HUMAN]	590	8	1	8	17.84	45.2087	7.32764
P61981	14-3-3 protein gamma OS=Homo sapiens GN=YWHAG PE=1 SV=2 - [1433G_HUMAN]	587	11	1	5	45.34	28.2849	4.89404
P41218	Myeloid cell nuclear differentiation antigen OS=Homo sapiens GN=MNDA PE=1 SV=1 - [MNDA_HUMAN]	583	22	1	22	48.16	45.8072	9.75928
P01766	Immunoglobulin heavy variable 3-13 OS=Homo sapiens GN=IGHV3-13 PE=1 SV=2 - [HV313_HUMAN]	582	8	1	3	61.21	12.4982	7.07861
P01621	Ig kappa chain V-III region NG9 (Fragment) OS=Homo sapiens PE=2 SV=1 - [KV303_HUMAN]	577	9	1	4	72	10.7223	6.52197
P40199	Carcinoembryonic antigen-related cell adhesion molecule 6 OS=Homo sapiens GN=CEACAM6 PE=1 SV=3 - [CEAM6_HUMAN]	564	7	1	5	24.71	37.1717	5.8208
P27824	Calnexin OS=Homo sapiens GN=CANX PE=1 SV=2 - [CALX_HUMAN]	562	16	1	16	29.22	67.5259	4.60205
P59827	BPI fold-containing family B member 4 OS=Homo sapiens GN=BPIFB4 PE=2 SV=2 - [BPIB4_HUMAN]	561	10	1	10	24.59	65.0135	5.10986
P52566	Rho GDP-dissociation inhibitor 2 OS=Homo sapiens GN=ARHGDIB PE=1 SV=3 - [GDIR2_HUMAN]	559	10	1	10	49.25	22.9736	5.21143
Q13885	Tubulin beta-2A chain OS=Homo sapiens GN=TUBB2A PE=1 SV=1 - [TBB2A_HUMAN]	553	21	3	2	57.08	49.875	4.89404
P11413	Glucose-6-phosphate 1-dehydrogenase OS=Homo sapiens GN=G6PD PE=1 SV=4 - [G6PD_HUMAN]	550	24	2	24	52.62	59.219	6.84424
Q9H0U4	Ras-related protein Rab-1B OS=Homo sapiens GN=RAB1B PE=1 SV=1 - [RAB1B_HUMAN]	534	5	17	3	26.87	22.1572	5.73193
Q04917	14-3-3 protein eta OS=Homo sapiens GN=YWHAH PE=1 SV=4 - [1433F_HUMAN]	530	9	1	4	35.77	28.201	4.84326
P04899	Guanine nucleotide-binding protein G(i) subunit alpha-2 OS=Homo sapiens GN=GNAI2 PE=1 SV=3 - [GNAI2_HUMAN]	528	13	5	9	47.89	40.4251	5.5415
P07384	Calpain-1 catalytic subunit OS=Homo sapiens GN=CAPN1 PE=1 SV=1 - [CAN1_HUMAN]	523	22	1	22	35.85	81.8382	5.66846
Q8WXI7	Mucin-16 OS=Homo sapiens GN=MUC16 PE=1 SV=3 - [MUC16_HUMAN]	520	25	1	24	3.96	1518.24	5.26221
P40121	Macrophage-capping protein OS=Homo sapiens GN=CAPG PE=1 SV=2 - [CAPG_HUMAN]	518	13	1	13	49.43	38.4745	6.18896
P30044	Peroxiredoxin-5, mitochondrial OS=Homo sapiens GN=PRDX5 PE=1 SV=4 - [PRDX5_HUMAN]	516	11	1	11	56.07	22.0725	8.70459
P28799	Granulins OS=Homo sapiens GN=GRN PE=1 SV=2 - [GRN_HUMAN]	511	15	1	15	29.68	63.4998	6.82959
P30041	Peroxiredoxin-6 OS=Homo sapiens GN=PRDX6 PE=1 SV=3 - [PRDX6_HUMAN]	503	6	1	6	29.46	25.0192	6.37939
P00747	Plasminogen OS=Homo sapiens GN=PLG PE=1 SV=2 - [PLMN_HUMAN]	498	26	3	26	43.83	90.5102	7.23975
Q9Y277	Voltage-dependent anion-selective channel protein 3 OS=Homo sapiens GN=VDAC3 PE=1 SV=1 - [VDAC3_HUMAN]	496	7	1	6	28.98	30.6393	8.66064
Q02817	Mucin-2 OS=Homo sapiens GN=MUC2 PE=1 SV=2 - [MUC2_HUMAN]	495	35	1	34	8.77	539.958	5.79541
P15814	Immunoglobulin lambda-like polypeptide 1 OS=Homo sapiens GN=IGLL1 PE=1 SV=1 - [IGLL1_HUMAN]	492	4	1	2	24.41	22.9486	10.0669
P01742	Immunoglobulin heavy variable 1-69 OS=Homo sapiens GN=IGHV1-69 PE=1 SV=2 - [HV169_HUMAN]	490	9	1	4	76.07	12.6513	9.17334
P00558	Phosphoglycerate kinase 1 OS=Homo sapiens GN=PGK1 PE=1 SV=3 - [PGK1_HUMAN]	489	18	2	18	48.2	44.5861	8.104
P09210	Glutathione S-transferase A2 OS=Homo sapiens GN=GSTA2 PE=1 SV=4 - [GSTA2_HUMAN]	488	9	4	9	27.03	25.6476	8.5874
P01602	Immunoglobulin kappa variable 1-5 OS=Homo sapiens GN=IGKV1-5 PE=1 SV=2 - [KV110_HUMAN]	484	8	2	6	49.57	12.7734	8.27979
P25705	ATP synthase subunit alpha, mitochondrial OS=Homo sapiens GN=ATP5A1 PE=1 SV=1 - [ATPA_HUMAN]	482	20	22	18	41.23	59.7136	9.12939
P48595	Serpin B10 OS=Homo sapiens GN=SERPINB10 PE=1 SV=1 - [SPB10_HUMAN]	475	17	1	17	49.37	45.3739	6.16357
P02765	Alpha-2-HS-glycoprotein OS=Homo sapiens GN=AHSG PE=1 SV=1 - [FETUA_HUMAN]	467	11	1	10	45.5	39.2997	5.71924
Q15323	Keratin, type I cuticular Ha1 OS=Homo sapiens GN=KRT31 PE=1 SV=3 - [K1H1_HUMAN]	464	10	4	4	28.13	47.2071	4.88135
P43353	Aldehyde dehydrogenase family 3 member B1 OS=Homo sapiens GN=ALDH3B1 PE=1 SV=1 - [AL3B1_HUMAN]	442	12	3	11	24.79	51.8066	7.62061
P45880	Voltage-dependent anion-selective channel protein 2 OS=Homo sapiens GN=VDAC2 PE=1 SV=2 - [VDAC2_HUMAN]	438	11	1	11	41.16	31.5465	7.56201
P21796	Voltage-dependent anion-selective channel protein 1 OS=Homo sapiens GN=VDAC1 PE=1 SV=2 - [VDAC1_HUMAN]	438	8	1	7	30.39	30.7536	8.54346
P13797	Plastin-3 OS=Homo sapiens GN=PLS3 PE=1 SV=4 - [PLST_HUMAN]	436	20	1	14	35.87	70.7662	5.60498
P18669	Phosphoglycerate mutase 1 OS=Homo sapiens GN=PGAM1 PE=1 SV=2 - [PGAM1_HUMAN]	422	16	3	16	79.13	28.7858	7.18115
P30838	Aldehyde dehydrogenase, dimeric NADP-preferring OS=Homo sapiens GN=ALDH3A1 PE=1 SV=3 - [AL3A1_HUMAN]	422	14	2	13	40.4	50.3628	6.53662
Q6ZN66	Guanylate-binding protein 6 OS=Homo sapiens GN=GBP6 PE=2 SV=1 - [GBP6_HUMAN]	422	26	1	26	56.08	72.3809	6.3667
P12882	Myosin-1 OS=Homo sapiens GN=MYH1 PE=1 SV=3 - [MYH1_HUMAN]	422	36	1	3	20.06	223.006	5.74463
P02792	Ferritin light chain OS=Homo sapiens GN=FTL PE=1 SV=2 - [FRIL_HUMAN]	419	9	1	9	51.43	20.0071	5.78271
P47756	F-actin-capping protein subunit beta OS=Homo sapiens GN=CAPZB PE=1 SV=4 - [CAPZB_HUMAN]	415	10	1	10	45.85	31.3308	5.59229
Q13231	Chitotriosidase-1 OS=Homo sapiens GN=CHIT1 PE=1 SV=1 - [CHIT1_HUMAN]	415	15	1	15	40.34	51.6484	6.96143
P23284	Peptidyl-prolyl cis-trans isomerase B OS=Homo sapiens GN=PPIB PE=1 SV=2 - [PPIB_HUMAN]	413	14	1	14	57.87	23.7275	9.40771
P12236	ADP/ATP translocase 3 OS=Homo sapiens GN=SLC25A6 PE=1 SV=4 - [ADT3_HUMAN]	413	11	2	2	37.58	32.8452	9.74463
P01611	Ig kappa chain V-I region Wes OS=Homo sapiens PE=1 SV=1 - [KV119_HUMAN]	410	5	1	5	50.93	11.6007	7.28369
P07195	L-lactate dehydrogenase B chain OS=Homo sapiens GN=LDHB PE=1 SV=2 - [LDHB_HUMAN]	409	14	1	13	49.7	36.6151	6.04932
P00390	Glutathione reductase, mitochondrial OS=Homo sapiens GN=GSR PE=1 SV=2 - [GSHR_HUMAN]	408	10	1	10	25.29	56.221	8.49951
P13987	CD59 glycoprotein OS=Homo sapiens GN=CD59 PE=1 SV=1 - [CD59_HUMAN]	405	6	1	6	36.72	14.1678	6.48096
Q13421	Mesothelin OS=Homo sapiens GN=MSLN PE=1 SV=2 - [MSLN_HUMAN]	404	20	1	20	36.51	68.9422	6.37939
P01605	Ig kappa chain V-I region Lay OS=Homo sapiens PE=1 SV=1 - [KV113_HUMAN]	403	4	1	3	41.67	11.8268	7.95752
Q09666	Neuroblast differentiation-associated protein AHNAK OS=Homo sapiens GN=AHNAK PE=1 SV=2 - [AHNK_HUMAN]	402	56	1	54	29.1	628.699	6.15088
P48594	Serpin B4 OS=Homo sapiens GN=SERPINB4 PE=1 SV=2 - [SPB4_HUMAN]	400	16	1	6	40.26	44.8255	6.21436
P0DJD8	Pepsin A-3 OS=Homo sapiens GN=PGA3 PE=1 SV=1 - [PEPA3_HUMAN]	400	4	3	4	8.51	41.9496	4.41162
Q96RM1	Small proline-rich protein 2F OS=Homo sapiens GN=SPRR2F PE=3 SV=1 - [SPR2F_HUMAN]	389	4	1	2	61.11	7.79954	8.30908
O43490	Prominin-1 OS=Homo sapiens GN=PROM1 PE=1 SV=1 - [PROM1_HUMAN]	386	21	1	21	33.18	97.1401	7.26904
Q99102	Mucin-4 OS=Homo sapiens GN=MUC4 PE=1 SV=4 - [MUC4_HUMAN]	376	17	1	17	12.45	231.373	6.26514
Q9GZZ8	Extracellular glycoprotein lacritin OS=Homo sapiens GN=LACRT PE=1 SV=1 - [LACRT_HUMAN]	375	7	1	7	37.68	14.2373	5.50342
Q10588	ADP-ribosyl cyclase/cyclic ADP-ribose hydrolase 2 OS=Homo sapiens GN=BST1 PE=1 SV=2 - [BST1_HUMAN]	373	11	1	11	34.91	35.7011	7.79639
P52790	Hexokinase-3 OS=Homo sapiens GN=HK3 PE=1 SV=2 - [HXK3_HUMAN]	371	23	1	22	32.18	98.9621	5.40186
P40925	Malate dehydrogenase, cytoplasmic OS=Homo sapiens GN=MDH1 PE=1 SV=4 - [MDHC_HUMAN]	371	14	1	14	60.18	36.403	7.35693
P01019	Angiotensinogen OS=Homo sapiens GN=AGT PE=1 SV=1 - [ANGT_HUMAN]	371	10	1	10	28.04	53.1205	6.31592
P15941	Mucin-1 OS=Homo sapiens GN=MUC1 PE=1 SV=3 - [MUC1_HUMAN]	370	5	1	5	5.1	122.029	7.47412
Q2M2I5	Keratin, type I cytoskeletal 24 OS=Homo sapiens GN=KRT24 PE=1 SV=1 - [K1C24_HUMAN]	368	17	1	13	33.14	55.0534	4.95752
Q9Y623	Myosin-4 OS=Homo sapiens GN=MYH4 PE=1 SV=2 - [MYH4_HUMAN]	365	30	1	3	17.79	222.932	5.84619
P02766	Transthyretin OS=Homo sapiens GN=TTR PE=1 SV=1 - [TTHY_HUMAN]	361	7	1	7	49.66	15.877	5.75732
P23528	Cofilin-1 OS=Homo sapiens GN=CFL1 PE=1 SV=3 - [COF1_HUMAN]	360	10	2	9	56.63	18.4907	8.08936
Q9UKX2	Myosin-2 OS=Homo sapiens GN=MYH2 PE=1 SV=1 - [MYH2_HUMAN]	355	35	1	6	19.01	222.906	5.8208
P0DOX6	Immunoglobulin mu heavy chain OS=Homo sapiens PE=1 SV=1 - [IGM_HUMAN]	353	14	3	3	28.47	63.4462	7.86963
P04196	Histidine-rich glycoprotein OS=Homo sapiens GN=HRG PE=1 SV=1 - [HRG_HUMAN]	350	12	1	12	27.81	59.5409	7.50342
Q5VSP4	Putative lipocalin 1-like protein 1 OS=Homo sapiens GN=LCN1P1 PE=5 SV=1 - [LC1L1_HUMAN]	349	5	1	2	37.04	17.907	4.99561
O43451	Maltase-glucoamylase, intestinal OS=Homo sapiens GN=MGAM PE=1 SV=5 - [MGA_HUMAN]	348	14	1	13	9.85	209.72	5.50342
Q9UBX7	Kallikrein-11 OS=Homo sapiens GN=KLK11 PE=1 SV=2 - [KLK11_HUMAN]	347	7	1	7	35.11	31.0388	8.93896
Q14624	Inter-alpha-trypsin inhibitor heavy chain H4 OS=Homo sapiens GN=ITIH4 PE=1 SV=4 - [ITIH4_HUMAN]	347	21	1	21	31.51	103.293	6.97607
P27482	Calmodulin-like protein 3 OS=Homo sapiens GN=CALML3 PE=1 SV=2 - [CALL3_HUMAN]	346	9	2	7	59.73	16.88	4.42432
Q96HE7	ERO1-like protein alpha OS=Homo sapiens GN=ERO1A PE=1 SV=2 - [ERO1A_HUMAN]	345	17	2	17	40.38	54.3581	5.68115
Q8N6Q3	CD177 antigen OS=Homo sapiens GN=CD177 PE=1 SV=2 - [CD177_HUMAN]	344	11	1	11	29.75	46.3325	6.29053
P01701	Immunoglobulin lambda variable 1-51 OS=Homo sapiens GN=IGLV1-51 PE=1 SV=2 - [LV151_HUMAN]	342	7	2	6	42.74	12.241	7.03467
P34931	Heat shock 70 kDa protein 1-like OS=Homo sapiens GN=HSPA1L PE=1 SV=2 - [HS71L_HUMAN]	340	14	1	3	23.24	70.3313	6.02393
P32119	Peroxiredoxin-2 OS=Homo sapiens GN=PRDX2 PE=1 SV=5 - [PRDX2_HUMAN]	340	12	1	11	42.42	21.8782	5.97314
Q15084	Protein disulfide-isomerase A6 OS=Homo sapiens GN=PDIA6 PE=1 SV=1 - [PDIA6_HUMAN]	339	11	1	11	29.32	48.0913	5.08447
P52907	F-actin-capping protein subunit alpha-1 OS=Homo sapiens GN=CAPZA1 PE=1 SV=3 - [CAZA1_HUMAN]	337	7	1	5	32.52	32.9023	5.69385
P48735	Isocitrate dehydrogenase [NADP], mitochondrial OS=Homo sapiens GN=IDH2 PE=1 SV=2 - [IDHP_HUMAN]	337	16	1	15	39.38	50.8769	8.68994
O43866	CD5 antigen-like OS=Homo sapiens GN=CD5L PE=1 SV=1 - [CD5L_HUMAN]	336	12	1	12	32.85	38.0629	5.46533
Q6MZM9	Proline-rich protein 27 OS=Homo sapiens GN=PRR27 PE=2 SV=1 - [PRR27_HUMAN]	334	3	1	3	23.29	22.7055	4.86865
P19105	Myosin regulatory light chain 12A OS=Homo sapiens GN=MYL12A PE=1 SV=2 - [ML12A_HUMAN]	332	8	3	8	62.57	19.7815	4.80518
P47929	Galectin-7 OS=Homo sapiens GN=LGALS7 PE=1 SV=2 - [LEG7_HUMAN]	330	8	1	8	77.94	15.0658	7.62061
P02545	Prelamin-A/C OS=Homo sapiens GN=LMNA PE=1 SV=1 - [LMNA_HUMAN]	329	29	1	29	42.17	74.0947	7.02002
Q92817	Envoplakin OS=Homo sapiens GN=EVPL PE=1 SV=3 - [EVPL_HUMAN]	324	51	1	51	31.48	231.463	6.96143
Q96C19	EF-hand domain-containing protein D2 OS=Homo sapiens GN=EFHD2 PE=1 SV=1 - [EFHD2_HUMAN]	322	7	2	7	29.17	26.6805	5.19873
P20742	Pregnancy zone protein OS=Homo sapiens GN=PZP PE=1 SV=4 - [PZP_HUMAN]	317	17	1	9	14.71	163.76	6.37939
Q9Y490	Talin-1 OS=Homo sapiens GN=TLN1 PE=1 SV=3 - [TLN1_HUMAN]	312	28	1	26	17	269.599	6.07471
O75083	WD repeat-containing protein 1 OS=Homo sapiens GN=WDR1 PE=1 SV=4 - [WDR1_HUMAN]	311	14	1	14	27.23	66.1519	6.65381
P14625	Endoplasmin OS=Homo sapiens GN=HSP90B1 PE=1 SV=1 - [ENPL_HUMAN]	310	17	2	15	22.67	92.4113	4.84326
P02794	Ferritin heavy chain OS=Homo sapiens GN=FTH1 PE=1 SV=2 - [FRIH_HUMAN]	309	11	3	11	63.39	21.2123	5.5542
O15335	Chondroadherin OS=Homo sapiens GN=CHAD PE=2 SV=2 - [CHAD_HUMAN]	308	10	1	10	42.62	40.4503	9.39307
P12883	Myosin-7 OS=Homo sapiens GN=MYH7 PE=1 SV=5 - [MYH7_HUMAN]	305	37	1	7	18.66	222.959	5.79541
O75367	Core histone macro-H2A.1 OS=Homo sapiens GN=H2AFY PE=1 SV=4 - [H2AY_HUMAN]	304	7	1	6	29.57	39.5925	9.78857
P21926	CD9 antigen OS=Homo sapiens GN=CD9 PE=1 SV=4 - [CD9_HUMAN]	303	3	1	3	20.61	25.399	7.15186
Q9UM07	Protein-arginine deiminase type-4 OS=Homo sapiens GN=PADI4 PE=1 SV=2 - [PADI4_HUMAN]	300	13	4	12	22.02	74.0314	6.58057
P20292	Arachidonate 5-lipoxygenase-activating protein OS=Homo sapiens GN=ALOX5AP PE=1 SV=2 - [AL5AP_HUMAN]	299	4	1	4	25.47	18.1454	8.44092
P80303	Nucleobindin-2 OS=Homo sapiens GN=NUCB2 PE=1 SV=2 - [NUCB2_HUMAN]	297	13	1	12	34.52	50.1643	5.12256
P08962	CD63 antigen OS=Homo sapiens GN=CD63 PE=1 SV=2 - [CD63_HUMAN]	296	4	1	4	12.61	25.6191	7.81104
Q96S97	Myeloid-associated differentiation marker OS=Homo sapiens GN=MYADM PE=1 SV=2 - [MYADM_HUMAN]	296	2	1	2	8.7	35.2503	8.14795
P13498	Cytochrome b-245 light chain OS=Homo sapiens GN=CYBA PE=1 SV=3 - [CY24A_HUMAN]	295	6	1	6	29.74	20.9991	9.53955
P61916	Epididymal secretory protein E1 OS=Homo sapiens GN=NPC2 PE=1 SV=1 - [NPC2_HUMAN]	291	8	1	8	45.03	16.5595	7.6499
P78417	Glutathione S-transferase omega-1 OS=Homo sapiens GN=GSTO1 PE=1 SV=2 - [GSTO1_HUMAN]	289	11	1	11	42.74	27.548	6.59521
P09960	Leukotriene A-4 hydrolase OS=Homo sapiens GN=LTA4H PE=1 SV=2 - [LKHA4_HUMAN]	288	19	1	19	39.77	69.2412	6.17627
Q3SY84	Keratin, type II cytoskeletal 71 OS=Homo sapiens GN=KRT71 PE=1 SV=3 - [K2C71_HUMAN]	288	10	1	3	16.44	57.256	6.60986
P06748	Nucleophosmin OS=Homo sapiens GN=NPM1 PE=1 SV=2 - [NPM_HUMAN]	287	4	1	3	20.07	32.5548	4.77979
Q96PL1	Secretoglobin family 3A member 2 OS=Homo sapiens GN=SCGB3A2 PE=2 SV=1 - [SG3A2_HUMAN]	287	8	1	8	67.74	10.1547	7.28369
P35609	Alpha-actinin-2 OS=Homo sapiens GN=ACTN2 PE=1 SV=1 - [ACTN2_HUMAN]	286	25	1	9	29.31	103.788	5.45264
Q14444	Caprin-1 OS=Homo sapiens GN=CAPRIN1 PE=1 SV=2 - [CAPR1_HUMAN]	286	2	1	2	7.33	78.318	5.24951
Q8IX19	Mast cell-expressed membrane protein 1 OS=Homo sapiens GN=MCEMP1 PE=1 SV=1 - [MCEM1_HUMAN]	282	4	4	4	18.18	21.215	8.86572
P05089	Arginase-1 OS=Homo sapiens GN=ARG1 PE=1 SV=2 - [ARGI1_HUMAN]	282	8	1	8	33.23	34.7133	7.21045
P13473	Lysosome-associated membrane glycoprotein 2 OS=Homo sapiens GN=LAMP2 PE=1 SV=2 - [LAMP2_HUMAN]	276	4	1	4	8.78	44.9323	5.63037
P32926	Desmoglein-3 OS=Homo sapiens GN=DSG3 PE=1 SV=2 - [DSG3_HUMAN]	274	17	1	17	22.82	107.465	4.99561
P06737	Glycogen phosphorylase, liver form OS=Homo sapiens GN=PYGL PE=1 SV=4 - [PYGL_HUMAN]	273	27	1	24	36.72	97.087	7.1665
P55058	Phospholipid transfer protein OS=Homo sapiens GN=PLTP PE=1 SV=1 - [PLTP_HUMAN]	272	11	1	11	23.94	54.7045	7.00537
P01042	Kininogen-1 OS=Homo sapiens GN=KNG1 PE=1 SV=2 - [KNG1_HUMAN]	271	18	1	18	26.55	71.9122	6.81494
P51149	Ras-related protein Rab-7a OS=Homo sapiens GN=RAB7A PE=1 SV=1 - [RAB7A_HUMAN]	265	8	1	8	41.06	23.4748	6.69775
P01703	Ig lambda chain V-I region NEWM OS=Homo sapiens PE=1 SV=1 - [LV105_HUMAN]	265	3	1	2	33.98	10.8975	9.29053
P02741	C-reactive protein OS=Homo sapiens GN=CRP PE=1 SV=1 - [CRP_HUMAN]	264	5	1	5	22.32	25.0227	5.63037
P07477	Trypsin-1 OS=Homo sapiens GN=PRSS1 PE=1 SV=1 - [TRY1_HUMAN]	263	3	4	2	15.38	26.5411	6.50732
P08697	Alpha-2-antiplasmin OS=Homo sapiens GN=SERPINF2 PE=1 SV=3 - [A2AP_HUMAN]	262	9	1	9	29.94	54.5311	6.29053
P07108	Acyl-CoA-binding protein OS=Homo sapiens GN=DBI PE=1 SV=2 - [ACBP_HUMAN]	260	8	1	8	75.86	10.038	6.56592
P01599	Immunoglobulin kappa variable 1-17 OS=Homo sapiens GN=IGKV1-17 PE=1 SV=2 - [KV107_HUMAN]	260	9	5	4	52.99	12.7704	8.67529
Q86T26	Transmembrane protease serine 11B OS=Homo sapiens GN=TMPRSS11B PE=2 SV=3 - [TM11B_HUMAN]	257	12	3	12	26.92	46.3072	8.85107
Q16851	UTP--glucose-1-phosphate uridylyltransferase OS=Homo sapiens GN=UGP2 PE=1 SV=5 - [UGPA_HUMAN]	256	12	1	12	28.15	56.9047	8.14795
P41439	Folate receptor gamma OS=Homo sapiens GN=FOLR3 PE=1 SV=1 - [FOLR3_HUMAN]	256	13	2	13	51.44	27.6199	7.82568
O00584	Ribonuclease T2 OS=Homo sapiens GN=RNASET2 PE=1 SV=2 - [RNT2_HUMAN]	255	7	1	7	31.25	29.4618	7.07861
P13533	Myosin-6 OS=Homo sapiens GN=MYH6 PE=1 SV=5 - [MYH6_HUMAN]	253	31	1	3	16.97	223.596	5.73193
P04430	Ig kappa chain V-I region BAN OS=Homo sapiens PE=1 SV=1 - [KV122_HUMAN]	251	2	1	2	16.67	11.8328	8.44092
P23083	Immunoglobulin heavy variable 1-2 OS=Homo sapiens GN=IGHV1-2 PE=1 SV=2 - [HV102_HUMAN]	251	8	2	4	48.72	13.0763	9.12939
P06753	Tropomyosin alpha-3 chain OS=Homo sapiens GN=TPM3 PE=1 SV=2 - [TPM3_HUMAN]	250	15	1	5	42.11	32.9298	4.71631
P35241	Radixin OS=Homo sapiens GN=RDX PE=1 SV=1 - [RADI_HUMAN]	250	12	1	2	16.81	68.5214	6.3667
P05090	Apolipoprotein D OS=Homo sapiens GN=APOD PE=1 SV=1 - [APOD_HUMAN]	250	9	1	9	37.04	21.2618	5.14795
Q9ULZ3	Apoptosis-associated speck-like protein containing a CARD OS=Homo sapiens GN=PYCARD PE=1 SV=2 - [ASC_HUMAN]	250	8	2	8	42.05	21.6133	6.34131
Q13162	Peroxiredoxin-4 OS=Homo sapiens GN=PRDX4 PE=1 SV=1 - [PRDX4_HUMAN]	248	8	1	5	33.95	30.5208	6.29053
Q05315	Galectin-10 OS=Homo sapiens GN=CLC PE=1 SV=3 - [LEG10_HUMAN]	248	6	2	6	35.21	16.4422	7.37158
P02743	Serum amyloid P-component OS=Homo sapiens GN=APCS PE=1 SV=2 - [SAMP_HUMAN]	247	9	1	9	36.32	25.3711	6.53662
Q9Y6N5	Sulfide:quinone oxidoreductase, mitochondrial OS=Homo sapiens GN=SQRDL PE=1 SV=1 - [SQRD_HUMAN]	246	16	1	16	38.67	49.9289	9.11475
Q00325	Phosphate carrier protein, mitochondrial OS=Homo sapiens GN=SLC25A3 PE=1 SV=2 - [MPCP_HUMAN]	244	9	1	9	23.48	40.0687	9.37842
P00491	Purine nucleoside phosphorylase OS=Homo sapiens GN=PNP PE=1 SV=2 - [PNPH_HUMAN]	244	15	1	15	57.79	32.0972	6.94678
P69891	Hemoglobin subunit gamma-1 OS=Homo sapiens GN=HBG1 PE=1 SV=2 - [HBG1_HUMAN]	244	7	3	6	57.82	16.1303	7.1958
Q00610	Clathrin heavy chain 1 OS=Homo sapiens GN=CLTC PE=1 SV=5 - [CLH1_HUMAN]	243	32	2	32	22.93	191.493	5.69385
P26641	Elongation factor 1-gamma OS=Homo sapiens GN=EEF1G PE=1 SV=3 - [EF1G_HUMAN]	242	13	1	13	40.5	50.0871	6.66846
P22392	Nucleoside diphosphate kinase B OS=Homo sapiens GN=NME2 PE=1 SV=1 - [NDKB_HUMAN]	240	10	2	5	71.05	17.2869	8.41162
O95968	Secretoglobin family 1D member 1 OS=Homo sapiens GN=SCGB1D1 PE=1 SV=1 - [SG1D1_HUMAN]	240	6	1	6	24.44	9.89138	9.24658
P20700	Lamin-B1 OS=Homo sapiens GN=LMNB1 PE=1 SV=2 - [LMNB1_HUMAN]	239	15	2	15	28.5	66.3676	5.16064
P13164	Interferon-induced transmembrane protein 1 OS=Homo sapiens GN=IFITM1 PE=1 SV=3 - [IFM1_HUMAN]	237	3	3	3	30.4	13.9553	7.92822
P01903	HLA class II histocompatibility antigen, DR alpha chain OS=Homo sapiens GN=HLA-DRA PE=1 SV=1 - [DRA_HUMAN]	236	8	1	7	32.68	28.5887	4.99561
O75368	SH3 domain-binding glutamic acid-rich-like protein OS=Homo sapiens GN=SH3BGRL PE=1 SV=1 - [SH3L1_HUMAN]	234	7	1	7	62.28	12.7664	5.24951
P11279	Lysosome-associated membrane glycoprotein 1 OS=Homo sapiens GN=LAMP1 PE=1 SV=3 - [LAMP1_HUMAN]	234	6	1	6	13.43	44.8538	8.74854
P02747	Complement C1q subcomponent subunit C OS=Homo sapiens GN=C1QC PE=1 SV=3 - [C1QC_HUMAN]	229	5	1	5	25.31	25.7571	8.41162
Q14344	Guanine nucleotide-binding protein subunit alpha-13 OS=Homo sapiens GN=GNA13 PE=1 SV=2 - [GNA13_HUMAN]	227	4	2	3	11.94	44.0217	8.00146
Q15365	Poly(rC)-binding protein 1 OS=Homo sapiens GN=PCBP1 PE=1 SV=2 - [PCBP1_HUMAN]	226	6	1	6	25.84	37.4739	7.09326
Q6DRA6	Putative histone H2B type 2-D OS=Homo sapiens GN=HIST2H2BD PE=5 SV=3 - [H2B2D_HUMAN]	226	6	2	3	27.44	18.0065	10.5796
Q96TA1	Niban-like protein 1 OS=Homo sapiens GN=FAM129B PE=1 SV=3 - [NIBL1_HUMAN]	224	13	1	13	22.79	84.0847	6.18896
P07951	Tropomyosin beta chain OS=Homo sapiens GN=TPM2 PE=1 SV=1 - [TPM2_HUMAN]	224	11	1	3	30.63	32.8306	4.70361
P15144	Aminopeptidase N OS=Homo sapiens GN=ANPEP PE=1 SV=4 - [AMPN_HUMAN]	223	22	1	22	28.44	109.471	5.47803
P27695	DNA-(apurinic or apyrimidinic site) lyase OS=Homo sapiens GN=APEX1 PE=1 SV=2 - [APEX1_HUMAN]	220	7	1	7	31.13	35.5322	8.11865
Q6UWW0	Lipocalin-15 OS=Homo sapiens GN=LCN15 PE=1 SV=1 - [LCN15_HUMAN]	219	8	1	8	41.85	20.4411	4.94482
Q9UIV8	Serpin B13 OS=Homo sapiens GN=SERPINB13 PE=1 SV=2 - [SPB13_HUMAN]	218	14	1	13	36.32	44.2482	5.70654
Q15080	Neutrophil cytosol factor 4 OS=Homo sapiens GN=NCF4 PE=1 SV=2 - [NCF4_HUMAN]	218	9	1	9	31.56	39.0073	6.82959
P61586	Transforming protein RhoA OS=Homo sapiens GN=RHOA PE=1 SV=1 - [RHOA_HUMAN]	217	9	4	9	50.26	21.7541	6.1001
P01031	Complement C5 OS=Homo sapiens GN=C5 PE=1 SV=4 - [CO5_HUMAN]	217	27	1	26	17.9	188.186	6.52197
P09493	Tropomyosin alpha-1 chain OS=Homo sapiens GN=TPM1 PE=1 SV=2 - [TPM1_HUMAN]	213	13	1	4	38.73	32.6887	4.7417
P60903	Protein S100-A10 OS=Homo sapiens GN=S100A10 PE=1 SV=2 - [S10AA_HUMAN]	212	3	1	3	27.84	11.1955	7.37158
P18510	Interleukin-1 receptor antagonist protein OS=Homo sapiens GN=IL1RN PE=1 SV=1 - [IL1RA_HUMAN]	212	6	1	6	38.42	20.042	6.18896
P05546	Heparin cofactor 2 OS=Homo sapiens GN=SERPIND1 PE=1 SV=3 - [HEP2_HUMAN]	209	11	1	11	22.44	57.0342	6.90283
P01705	Ig lambda chain V-II region NEI OS=Homo sapiens PE=1 SV=1 - [LV202_HUMAN]	208	3	1	3	20.72	11.5836	8.63135
P13688	Carcinoembryonic antigen-related cell adhesion molecule 1 OS=Homo sapiens GN=CEACAM1 PE=1 SV=2 - [CEAM1_HUMAN]	206	4	1	3	11.98	57.5247	5.97314
Q13510	Acid ceramidase OS=Homo sapiens GN=ASAH1 PE=1 SV=5 - [ASAH1_HUMAN]	205	15	1	15	41.27	44.6308	7.62061
P62834	Ras-related protein Rap-1A OS=Homo sapiens GN=RAP1A PE=1 SV=1 - [RAP1A_HUMAN]	203	7	1	4	40.76	20.9737	6.66846
P15531	Nucleoside diphosphate kinase A OS=Homo sapiens GN=NME1 PE=1 SV=1 - [NDKA_HUMAN]	202	7	1	2	50	17.1377	6.18896
P61158	Actin-related protein 3 OS=Homo sapiens GN=ACTR3 PE=1 SV=3 - [ARP3_HUMAN]	199	13	3	13	34.45	47.341	5.88428
P55072	Transitional endoplasmic reticulum ATPase OS=Homo sapiens GN=VCP PE=1 SV=4 - [TERA_HUMAN]	197	12	4	11	18.61	89.2657	5.26221
Q86UX7	Fermitin family homolog 3 OS=Homo sapiens GN=FERMT3 PE=1 SV=1 - [URP2_HUMAN]	197	15	1	15	26.24	75.905	6.97607
Q8WZ42	Titin OS=Homo sapiens GN=TTN PE=1 SV=4 - [TITIN_HUMAN]	196	66	14	66	2.21	3813.65	6.354
P0CG39	POTE ankyrin domain family member J OS=Homo sapiens GN=POTEJ PE=3 SV=1 - [POTEJ_HUMAN]	193	8	1	2	9.73	117.315	5.97314
P50552	Vasodilator-stimulated phosphoprotein OS=Homo sapiens GN=VASP PE=1 SV=3 - [VASP_HUMAN]	192	6	1	6	19.21	39.8051	8.93896
P63244	Receptor of activated protein C kinase 1 OS=Homo sapiens GN=RACK1 PE=1 SV=3 - [RACK1_HUMAN]	191	8	1	8	25.24	35.0546	7.69385
Q96FQ6	Protein S100-A16 OS=Homo sapiens GN=S100A16 PE=1 SV=1 - [S10AG_HUMAN]	191	5	1	5	64.08	11.794	6.78564
Q9UKR3	Kallikrein-13 OS=Homo sapiens GN=KLK13 PE=2 SV=1 - [KLK13_HUMAN]	190	7	1	7	27.44	30.5505	8.45557
Q7Z406	Myosin-14 OS=Homo sapiens GN=MYH14 PE=1 SV=2 - [MYH14_HUMAN]	189	14	3	5	6.97	227.732	5.60498
P35754	Glutaredoxin-1 OS=Homo sapiens GN=GLRX PE=1 SV=2 - [GLRX1_HUMAN]	189	4	1	4	50.94	11.7682	8.08936
P05387	60S acidic ribosomal protein P2 OS=Homo sapiens GN=RPLP2 PE=1 SV=1 - [RLA2_HUMAN]	188	5	1	5	76.52	11.6578	4.53857
P36952	Serpin B5 OS=Homo sapiens GN=SERPINB5 PE=1 SV=2 - [SPB5_HUMAN]	187	10	1	10	33.33	42.0734	6.04932
Q02487	Desmocollin-2 OS=Homo sapiens GN=DSC2 PE=1 SV=1 - [DSC2_HUMAN]	184	10	2	10	16.65	99.8987	5.33838
Q16610	Extracellular matrix protein 1 OS=Homo sapiens GN=ECM1 PE=1 SV=2 - [ECM1_HUMAN]	184	19	1	19	46.85	60.6353	6.7124
P07948	Tyrosine-protein kinase Lyn OS=Homo sapiens GN=LYN PE=1 SV=3 - [LYN_HUMAN]	183	11	22	8	26.76	58.5368	7.10791
Q96FN4	Copine-2 OS=Homo sapiens GN=CPNE2 PE=1 SV=3 - [CPNE2_HUMAN]	182	6	7	5	17.34	61.1506	6.07471
P02760	Protein AMBP OS=Homo sapiens GN=AMBP PE=1 SV=1 - [AMBP_HUMAN]	179	7	1	7	25.28	38.974	6.25244
P13489	Ribonuclease inhibitor OS=Homo sapiens GN=RNH1 PE=1 SV=2 - [RINI_HUMAN]	178	7	1	7	24.95	49.9411	4.81787
P02746	Complement C1q subcomponent subunit B OS=Homo sapiens GN=C1QB PE=1 SV=3 - [C1QB_HUMAN]	178	7	1	7	30.43	26.7045	8.63135
P08174	Complement decay-accelerating factor OS=Homo sapiens GN=CD55 PE=1 SV=4 - [DAF_HUMAN]	177	7	1	7	21.26	41.3736	7.59131
A6NJ16	Putative V-set and immunoglobulin domain-containing-like protein IGHV4OR15-8 OS=Homo sapiens GN=IGHV4OR15-8 PE=5 SV=2 - [IV4F8_HUMAN]	176	4	2	3	17.89	13.576	9.59814
Q96BQ1	Protein FAM3D OS=Homo sapiens GN=FAM3D PE=1 SV=1 - [FAM3D_HUMAN]	175	7	1	7	26.79	24.9468	9.33447
O60235	Transmembrane protease serine 11D OS=Homo sapiens GN=TMPRSS11D PE=1 SV=1 - [TM11D_HUMAN]	174	7	1	7	18.9	46.2344	8.38232
P01619	Ig kappa chain V-III region B6 OS=Homo sapiens PE=1 SV=1 - [KV301_HUMAN]	174	8	1	2	42.59	11.6278	9.24658
P08631	Tyrosine-protein kinase HCK OS=Homo sapiens GN=HCK PE=1 SV=5 - [HCK_HUMAN]	174	9	22	6	18.44	59.5617	6.69775
P09769	Tyrosine-protein kinase Fgr OS=Homo sapiens GN=FGR PE=1 SV=2 - [FGR_HUMAN]	173	9	21	7	20.04	59.4405	5.59229
P10412	Histone H1.4 OS=Homo sapiens GN=HIST1H1E PE=1 SV=2 - [H14_HUMAN]	173	9	3	2	31.05	21.852	11.0337
O95171	Sciellin OS=Homo sapiens GN=SCEL PE=1 SV=2 - [SCEL_HUMAN]	165	19	1	19	29.36	77.5044	9.37842
P61204	ADP-ribosylation factor 3 OS=Homo sapiens GN=ARF3 PE=1 SV=2 - [ARF3_HUMAN]	165	8	3	7	47.51	20.5877	7.43018
O15511	Actin-related protein 2/3 complex subunit 5 OS=Homo sapiens GN=ARPC5 PE=1 SV=3 - [ARPC5_HUMAN]	163	3	1	3	26.49	16.3103	5.66846
P16403	Histone H1.2 OS=Homo sapiens GN=HIST1H1C PE=1 SV=2 - [H12_HUMAN]	163	9	3	2	28.17	21.3517	10.9312
P01601	Ig kappa chain V-ID region 16 (Fragment) OS=Homo sapiens GN=IGKV1D-16 PE=4 SV=2 - [KV109_HUMAN]	162	8	5	3	36.75	12.7222	7.73779
P05091	Aldehyde dehydrogenase, mitochondrial OS=Homo sapiens GN=ALDH2 PE=1 SV=2 - [ALDH2_HUMAN]	162	15	4	12	31.14	56.3456	7.04932
P59998	Actin-related protein 2/3 complex subunit 4 OS=Homo sapiens GN=ARPC4 PE=1 SV=3 - [ARPC4_HUMAN]	159	6	1	6	41.07	19.6543	8.42627
P34096	Ribonuclease 4 OS=Homo sapiens GN=RNASE4 PE=1 SV=3 - [RNAS4_HUMAN]	159	8	1	8	49.66	16.8294	9.02686
Q99954	Submaxillary gland androgen-regulated protein 3A OS=Homo sapiens GN=SMR3A PE=3 SV=2 - [SMR3A_HUMAN]	159	2	1	2	19.4	14.0391	9.56885
P63092	Guanine nucleotide-binding protein G(s) subunit alpha isoforms short OS=Homo sapiens GN=GNAS PE=1 SV=1 - [GNAS2_HUMAN]	158	5	3	4	17.51	45.6359	5.8208
P56134	ATP synthase subunit f, mitochondrial OS=Homo sapiens GN=ATP5J2 PE=1 SV=3 - [ATPK_HUMAN]	158	2	1	2	25.53	10.9107	9.67139
P10809	60 kDa heat shock protein, mitochondrial OS=Homo sapiens GN=HSPD1 PE=1 SV=2 - [CH60_HUMAN]	157	17	1	17	35.25	61.0164	5.87158
O00764	Pyridoxal kinase OS=Homo sapiens GN=PDXK PE=1 SV=1 - [PDXK_HUMAN]	156	6	1	6	27.56	35.0799	6.12549
O43240	Kallikrein-10 OS=Homo sapiens GN=KLK10 PE=1 SV=3 - [KLK10_HUMAN]	155	8	1	8	27.17	30.1503	8.5874
P07858	Cathepsin B OS=Homo sapiens GN=CTSB PE=1 SV=3 - [CATB_HUMAN]	154	11	1	11	39.53	37.7968	6.30322
O15143	Actin-related protein 2/3 complex subunit 1B OS=Homo sapiens GN=ARPC1B PE=1 SV=3 - [ARC1B_HUMAN]	154	5	1	5	12.63	40.9234	8.35303
Q99829	Copine-1 OS=Homo sapiens GN=CPNE1 PE=1 SV=1 - [CPNE1_HUMAN]	154	7	1	7	18.06	59.0215	5.8335
P62879	Guanine nucleotide-binding protein G(I)/G(S)/G(T) subunit beta-2 OS=Homo sapiens GN=GNB2 PE=1 SV=3 - [GBB2_HUMAN]	153	9	3	4	32.94	37.3071	5.99854
P60953	Cell division control protein 42 homolog OS=Homo sapiens GN=CDC42 PE=1 SV=2 - [CDC42_HUMAN]	152	5	3	4	31.41	21.245	6.55127
Q9UBD6	Ammonium transporter Rh type C OS=Homo sapiens GN=RHCG PE=1 SV=1 - [RHCG_HUMAN]	151	5	1	5	11.06	53.1439	6.39209
P01597	Ig kappa chain V-I region DEE OS=Homo sapiens PE=1 SV=1 - [KV105_HUMAN]	151	4	1	3	38.89	11.6538	9.36377
P08575	Receptor-type tyrosine-protein phosphatase C OS=Homo sapiens GN=PTPRC PE=1 SV=2 - [PTPRC_HUMAN]	150	22	1	22	19.48	147.162	6.15088
P35237	Serpin B6 OS=Homo sapiens GN=SERPINB6 PE=1 SV=3 - [SPB6_HUMAN]	147	11	1	10	37.77	42.5941	5.2749
P30048	Thioredoxin-dependent peroxide reductase, mitochondrial OS=Homo sapiens GN=PRDX3 PE=1 SV=3 - [PRDX3_HUMAN]	146	7	1	7	27.34	27.6752	7.78174
P19957	Elafin OS=Homo sapiens GN=PI3 PE=1 SV=3 - [ELAF_HUMAN]	145	7	1	7	45.3	12.2614	8.82178
O75390	Citrate synthase, mitochondrial OS=Homo sapiens GN=CS PE=1 SV=2 - [CISY_HUMAN]	145	11	1	11	21.24	51.6795	8.32373
P08493	Matrix Gla protein OS=Homo sapiens GN=MGP PE=1 SV=2 - [MGP_HUMAN]	142	2	1	2	23.3	12.3453	9.67139
P18085	ADP-ribosylation factor 4 OS=Homo sapiens GN=ARF4 PE=1 SV=3 - [ARF4_HUMAN]	140	6	9	5	30.56	20.4977	7.13721
Q02878	60S ribosomal protein L6 OS=Homo sapiens GN=RPL6 PE=1 SV=3 - [RL6_HUMAN]	140	8	1	8	30.21	32.7076	10.5796
Q8WUM4	Programmed cell death 6-interacting protein OS=Homo sapiens GN=PDCD6IP PE=1 SV=1 - [PDC6I_HUMAN]	139	14	1	14	24.31	95.9631	6.52197
P08185	Corticosteroid-binding globulin OS=Homo sapiens GN=SERPINA6 PE=1 SV=1 - [CBG_HUMAN]	137	6	1	6	17.28	45.1119	6.03662
P08118	Beta-microseminoprotein OS=Homo sapiens GN=MSMB PE=1 SV=1 - [MSMB_HUMAN]	136	7	1	7	36.84	12.8561	5.50342
P07476	Involucrin OS=Homo sapiens GN=IVL PE=1 SV=2 - [INVO_HUMAN]	133	19	1	18	38.63	68.4372	4.61475
Q13813	Spectrin alpha chain, non-erythrocytic 1 OS=Homo sapiens GN=SPTAN1 PE=1 SV=3 - [SPTN1_HUMAN]	133	22	1	22	13.51	284.364	5.35107
P09972	Fructose-bisphosphate aldolase C OS=Homo sapiens GN=ALDOC PE=1 SV=2 - [ALDOC_HUMAN]	132	9	2	5	29.95	39.4312	6.87354
P62249	40S ribosomal protein S16 OS=Homo sapiens GN=RPS16 PE=1 SV=2 - [RS16_HUMAN]	130	3	1	3	19.18	16.435	10.2134
P62873	Guanine nucleotide-binding protein G(I)/G(S)/G(T) subunit beta-1 OS=Homo sapiens GN=GNB1 PE=1 SV=3 - [GBB1_HUMAN]	129	7	2	2	23.24	37.353	5.99854
Q9BUF5	Tubulin beta-6 chain OS=Homo sapiens GN=TUBB6 PE=1 SV=1 - [TBB6_HUMAN]	129	9	2	2	23.32	49.825	4.88135
P46781	40S ribosomal protein S9 OS=Homo sapiens GN=RPS9 PE=1 SV=3 - [RS9_HUMAN]	126	9	1	9	29.38	22.5776	10.6528
P24534	Elongation factor 1-beta OS=Homo sapiens GN=EEF1B2 PE=1 SV=3 - [EF1B_HUMAN]	126	6	1	4	23.56	24.7483	4.66553
P23381	Tryptophan--tRNA ligase, cytoplasmic OS=Homo sapiens GN=WARS PE=1 SV=2 - [SYWC_HUMAN]	126	16	1	16	44.8	53.1316	6.22705
P05388	60S acidic ribosomal protein P0 OS=Homo sapiens GN=RPLP0 PE=1 SV=1 - [RLA0_HUMAN]	125	4	2	4	13.25	34.2518	5.97314
P49788	Retinoic acid receptor responder protein 1 OS=Homo sapiens GN=RARRES1 PE=1 SV=2 - [TIG1_HUMAN]	125	8	1	8	32.31	33.2642	8.51416
P16870	Carboxypeptidase E OS=Homo sapiens GN=CPE PE=1 SV=1 - [CBPE_HUMAN]	124	12	1	12	33.19	53.1171	5.13525
P60900	Proteasome subunit alpha type-6 OS=Homo sapiens GN=PSMA6 PE=1 SV=1 - [PSA6_HUMAN]	122	6	1	6	26.83	27.3818	6.75635
P30046	D-dopachrome decarboxylase OS=Homo sapiens GN=DDT PE=1 SV=3 - [DOPD_HUMAN]	122	3	2	3	32.2	12.7037	7.29834
P53634	Dipeptidyl peptidase 1 OS=Homo sapiens GN=CTSC PE=1 SV=2 - [CATC_HUMAN]	122	13	1	13	30.45	51.8203	6.99072
P52565	Rho GDP-dissociation inhibitor 1 OS=Homo sapiens GN=ARHGDIA PE=1 SV=3 - [GDIR1_HUMAN]	121	6	1	6	44.61	23.1927	5.10986
Q9NZT1	Calmodulin-like protein 5 OS=Homo sapiens GN=CALML5 PE=1 SV=2 - [CALL5_HUMAN]	120	5	1	5	32.19	15.8828	4.43701
P63000	Ras-related C3 botulinum toxin substrate 1 OS=Homo sapiens GN=RAC1 PE=1 SV=1 - [RAC1_HUMAN]	120	10	3	4	40.1	21.4362	8.49951
P00505	Aspartate aminotransferase, mitochondrial OS=Homo sapiens GN=GOT2 PE=1 SV=3 - [AATM_HUMAN]	119	10	1	9	31.86	47.4873	9.01221
O43653	Prostate stem cell antigen OS=Homo sapiens GN=PSCA PE=1 SV=1 - [PSCA_HUMAN]	118	4	1	4	28.46	12.9035	5.2876
O75923	Dysferlin OS=Homo sapiens GN=DYSF PE=1 SV=1 - [DYSF_HUMAN]	118	22	3	21	12.88	237.144	5.64307
P09467	Fructose-1,6-bisphosphatase 1 OS=Homo sapiens GN=FBP1 PE=1 SV=5 - [F16P1_HUMAN]	118	7	1	6	27.22	36.8188	6.99072
P04632	Calpain small subunit 1 OS=Homo sapiens GN=CAPNS1 PE=1 SV=1 - [CPNS1_HUMAN]	117	9	1	7	44.4	28.2977	5.19873
Q12907	Vesicular integral-membrane protein VIP36 OS=Homo sapiens GN=LMAN2 PE=1 SV=1 - [LMAN2_HUMAN]	115	6	1	6	21.63	40.2031	6.94678
Q92743	Serine protease HTRA1 OS=Homo sapiens GN=HTRA1 PE=1 SV=1 - [HTRA1_HUMAN]	113	12	1	12	29.79	51.2546	7.82568
P04431	Ig kappa chain V-I region Walker OS=Homo sapiens PE=1 SV=1 - [KV123_HUMAN]	113	4	5	2	32.56	14.0601	8.96826
P54652	Heat shock-related 70 kDa protein 2 OS=Homo sapiens GN=HSPA2 PE=1 SV=1 - [HSP72_HUMAN]	113	16	23	4	23.16	69.9779	5.74463
Q99623	Prohibitin-2 OS=Homo sapiens GN=PHB2 PE=1 SV=2 - [PHB2_HUMAN]	113	10	1	10	41.47	33.2759	9.83252
O15144	Actin-related protein 2/3 complex subunit 2 OS=Homo sapiens GN=ARPC2 PE=1 SV=1 - [ARPC2_HUMAN]	112	9	1	9	37	34.3115	7.35693
O00160	Unconventional myosin-If OS=Homo sapiens GN=MYO1F PE=1 SV=3 - [MYO1F_HUMAN]	112	14	2	13	17.4	124.766	9.11475
P32942	Intercellular adhesion molecule 3 OS=Homo sapiens GN=ICAM3 PE=1 SV=2 - [ICAM3_HUMAN]	112	3	1	3	4.94	59.5028	5.42725
P25787	Proteasome subunit alpha type-2 OS=Homo sapiens GN=PSMA2 PE=1 SV=2 - [PSA2_HUMAN]	112	4	1	4	27.35	25.8823	7.43018
P51531	Probable global transcription activator SNF2L2 OS=Homo sapiens GN=SMARCA2 PE=1 SV=2 - [SMCA2_HUMAN]	111	3	2	3	1.32	181.166	7.1958
P29034	Protein S100-A2 OS=Homo sapiens GN=S100A2 PE=1 SV=3 - [S10A2_HUMAN]	110	5	1	5	27.55	11.1094	4.77979
P61160	Actin-related protein 2 OS=Homo sapiens GN=ACTR2 PE=1 SV=1 - [ARP2_HUMAN]	110	7	2	7	24.37	44.7322	6.7417
P04844	Dolichyl-diphosphooligosaccharide--protein glycosyltransferase subunit 2 OS=Homo sapiens GN=RPN2 PE=1 SV=3 - [RPN2_HUMAN]	110	9	1	9	34.55	69.241	5.69385
P06731	Carcinoembryonic antigen-related cell adhesion molecule 5 OS=Homo sapiens GN=CEACAM5 PE=1 SV=3 - [CEAM5_HUMAN]	109	9	1	6	17.52	76.7472	5.92236
P62328	Thymosin beta-4 OS=Homo sapiens GN=TMSB4X PE=1 SV=2 - [TYB4_HUMAN]	109	6	1	6	56.82	5.04952	5.05908
Q9P0M6	Core histone macro-H2A.2 OS=Homo sapiens GN=H2AFY2 PE=1 SV=3 - [H2AW_HUMAN]	109	3	1	2	14.78	40.0334	9.68604
Q9Y2Y8	Proteoglycan 3 OS=Homo sapiens GN=PRG3 PE=1 SV=2 - [PRG3_HUMAN]	109	4	1	4	27.11	25.389	4.80518
Q16769	Glutaminyl-peptide cyclotransferase OS=Homo sapiens GN=QPCT PE=1 SV=1 - [QPCT_HUMAN]	108	3	1	3	10.25	40.8508	6.60986
Q08722	Leukocyte surface antigen CD47 OS=Homo sapiens GN=CD47 PE=1 SV=1 - [CD47_HUMAN]	108	3	1	3	8.67	35.1907	7.21045
P51159	Ras-related protein Rab-27A OS=Homo sapiens GN=RAB27A PE=1 SV=3 - [RB27A_HUMAN]	107	6	12	4	24.43	24.8523	5.22412
Q9UHA7	Interleukin-36 alpha OS=Homo sapiens GN=IL36A PE=1 SV=1 - [IL36A_HUMAN]	107	5	1	5	35.44	17.673	6.30322
Q99828	Calcium and integrin-binding protein 1 OS=Homo sapiens GN=CIB1 PE=1 SV=4 - [CIB1_HUMAN]	107	7	1	7	51.31	21.6899	4.77979
Q92882	Osteoclast-stimulating factor 1 OS=Homo sapiens GN=OSTF1 PE=1 SV=2 - [OSTF1_HUMAN]	106	4	1	4	22.43	23.7719	5.68115
Q8NBJ4	Golgi membrane protein 1 OS=Homo sapiens GN=GOLM1 PE=1 SV=1 - [GOLM1_HUMAN]	106	15	1	15	38.4	45.3058	4.97021
P14406	Cytochrome c oxidase subunit 7A2, mitochondrial OS=Homo sapiens GN=COX7A2 PE=1 SV=1 - [CX7A2_HUMAN]	105	2	1	2	27.71	9.39011	9.75928
P00352	Retinal dehydrogenase 1 OS=Homo sapiens GN=ALDH1A1 PE=1 SV=2 - [AL1A1_HUMAN]	105	13	4	10	37.72	54.827	6.72705
P18124	60S ribosomal protein L7 OS=Homo sapiens GN=RPL7 PE=1 SV=1 - [RL7_HUMAN]	103	7	1	7	31.05	29.2072	10.6528
P36578	60S ribosomal protein L4 OS=Homo sapiens GN=RPL4 PE=1 SV=5 - [RL4_HUMAN]	103	8	1	8	21.78	47.6674	11.063
Q6UXB2	VEGF coregulated chemokine 1 OS=Homo sapiens GN=CXCL17 PE=1 SV=1 - [VCC1_HUMAN]	103	5	1	5	35.29	13.8102	10.9604
P61978	Heterogeneous nuclear ribonucleoprotein K OS=Homo sapiens GN=HNRNPK PE=1 SV=1 - [HNRPK_HUMAN]	103	9	1	9	26.57	50.9444	5.5415
Q6KB66	Keratin, type II cytoskeletal 80 OS=Homo sapiens GN=KRT80 PE=1 SV=2 - [K2C80_HUMAN]	101	10	1	8	21.46	50.4938	5.66846
O14818	Proteasome subunit alpha type-7 OS=Homo sapiens GN=PSMA7 PE=1 SV=1 - [PSA7_HUMAN]	101	6	2	6	29.03	27.8696	8.45557
P04843	Dolichyl-diphosphooligosaccharide--protein glycosyltransferase subunit 1 OS=Homo sapiens GN=RPN1 PE=1 SV=1 - [RPN1_HUMAN]	100	11	1	11	21.91	68.5268	6.37939
P09917	Arachidonate 5-lipoxygenase OS=Homo sapiens GN=ALOX5 PE=1 SV=2 - [LOX5_HUMAN]	100	14	1	14	26.11	77.9333	5.77002
P08571	Monocyte differentiation antigen CD14 OS=Homo sapiens GN=CD14 PE=1 SV=2 - [CD14_HUMAN]	100	9	1	9	32	40.0507	6.22705
P02810	Salivary acidic proline-rich phosphoprotein 1/2 OS=Homo sapiens GN=PRH1 PE=1 SV=2 - [PRPC_HUMAN]	99	16	1	16	63.25	17.0063	4.84326
P30040	Endoplasmic reticulum resident protein 29 OS=Homo sapiens GN=ERP29 PE=1 SV=4 - [ERP29_HUMAN]	99	6	1	6	26.44	28.9752	7.31299
P26583	High mobility group protein B2 OS=Homo sapiens GN=HMGB2 PE=1 SV=2 - [HMGB2_HUMAN]	99	12	1	10	43.54	24.0187	7.81104
P22314	Ubiquitin-like modifier-activating enzyme 1 OS=Homo sapiens GN=UBA1 PE=1 SV=3 - [UBA1_HUMAN]	99	14	1	14	21.74	117.774	5.75732
P20702	Integrin alpha-X OS=Homo sapiens GN=ITGAX PE=1 SV=3 - [ITAX_HUMAN]	99	5	2	4	4.39	127.749	6.63916
P14598	Neutrophil cytosol factor 1 OS=Homo sapiens GN=NCF1 PE=1 SV=3 - [NCF1_HUMAN]	99	13	3	13	40.51	44.6239	9.12939
O15145	Actin-related protein 2/3 complex subunit 3 OS=Homo sapiens GN=ARPC3 PE=1 SV=3 - [ARPC3_HUMAN]	99	5	1	5	27.53	20.5334	8.5874
Q6P2S7	Putative tetratricopeptide repeat protein 41 OS=Homo sapiens GN=TTC41P PE=5 SV=3 - [TTC41_HUMAN]	99	2	1	2	4.48	151.587	8.25049
O76011	Keratin, type I cuticular Ha4 OS=Homo sapiens GN=KRT34 PE=2 SV=2 - [KRT34_HUMAN]	98	6	2	2	14.45	49.3922	5.05908
P25786	Proteasome subunit alpha type-1 OS=Homo sapiens GN=PSMA1 PE=1 SV=1 - [PSA1_HUMAN]	98	7	1	7	26.24	29.5369	6.60986
Q13228	Selenium-binding protein 1 OS=Homo sapiens GN=SELENBP1 PE=1 SV=2 - [SBP1_HUMAN]	98	10	1	10	24.15	52.3576	6.3667
O15162	Phospholipid scramblase 1 OS=Homo sapiens GN=PLSCR1 PE=1 SV=1 - [PLS1_HUMAN]	98	6	1	6	24.84	35.0259	4.94482
P40394	Alcohol dehydrogenase class 4 mu/sigma chain OS=Homo sapiens GN=ADH7 PE=1 SV=2 - [ADH7_HUMAN]	97	10	1	10	30.31	41.4543	7.85498
Q96SN8	CDK5 regulatory subunit-associated protein 2 OS=Homo sapiens GN=CDK5RAP2 PE=1 SV=5 - [CK5P2_HUMAN]	97	6	1	5	4.23	214.905	5.57959
P33121	Long-chain-fatty-acid--CoA ligase 1 OS=Homo sapiens GN=ACSL1 PE=1 SV=1 - [ACSL1_HUMAN]	97	10	1	10	15.62	77.8929	7.15186
Q6ZVX7	F-box only protein 50 OS=Homo sapiens GN=NCCRP1 PE=1 SV=1 - [FBX50_HUMAN]	96	8	1	8	38.18	30.8279	6.62451
Q14697	Neutral alpha-glucosidase AB OS=Homo sapiens GN=GANAB PE=1 SV=3 - [GANAB_HUMAN]	96	17	1	17	21.61	106.807	6.13818
P80723	Brain acid soluble protein 1 OS=Homo sapiens GN=BASP1 PE=1 SV=2 - [BASP1_HUMAN]	95	10	1	10	68.72	22.68	4.62744
P04155	Trefoil factor 1 OS=Homo sapiens GN=TFF1 PE=1 SV=1 - [TFF1_HUMAN]	95	4	1	4	57.14	9.1432	4.34814
P15104	Glutamine synthetase OS=Homo sapiens GN=GLUL PE=1 SV=4 - [GLNA_HUMAN]	95	9	1	9	27.08	42.0373	6.88818
O95833	Chloride intracellular channel protein 3 OS=Homo sapiens GN=CLIC3 PE=1 SV=2 - [CLIC3_HUMAN]	94	7	1	7	41.1	26.6317	6.43018
P16401	Histone H1.5 OS=Homo sapiens GN=HIST1H1B PE=1 SV=3 - [H15_HUMAN]	94	10	1	8	30.09	22.5665	10.9165
P15880	40S ribosomal protein S2 OS=Homo sapiens GN=RPS2 PE=1 SV=2 - [RS2_HUMAN]	93	9	1	9	30.72	31.3046	10.2427
P25774	Cathepsin S OS=Homo sapiens GN=CTSS PE=1 SV=3 - [CATS_HUMAN]	93	11	1	11	32.93	37.4713	8.33838
Q5Y7A7	HLA class II histocompatibility antigen, DRB1-13 beta chain OS=Homo sapiens GN=HLA-DRB1 PE=1 SV=1 - [2B1D_HUMAN]	93	8	4	2	40.23	29.989	6.99072
P18065	Insulin-like growth factor-binding protein 2 OS=Homo sapiens GN=IGFBP2 PE=1 SV=2 - [IBP2_HUMAN]	93	6	1	6	23.69	34.7912	7.50342
P01719	Ig lambda chain V-V region DEL OS=Homo sapiens PE=1 SV=1 - [LV501_HUMAN]	92	2	1	2	31.48	11.3356	5.36377
P55259	Pancreatic secretory granule membrane major glycoprotein GP2 OS=Homo sapiens GN=GP2 PE=2 SV=3 - [GP2_HUMAN]	92	5	1	5	10.43	59.4417	5.23682
P02652	Apolipoprotein A-II OS=Homo sapiens GN=APOA2 PE=1 SV=1 - [APOA2_HUMAN]	92	8	1	8	64	11.1679	6.62451
P60842	Eukaryotic initiation factor 4A-I OS=Homo sapiens GN=EIF4A1 PE=1 SV=1 - [IF4A1_HUMAN]	91	12	3	12	33.99	46.1246	5.47803
P20618	Proteasome subunit beta type-1 OS=Homo sapiens GN=PSMB1 PE=1 SV=2 - [PSB1_HUMAN]	91	6	1	6	39	26.4724	8.1333
P00403	Cytochrome c oxidase subunit 2 OS=Homo sapiens GN=MT-CO2 PE=1 SV=1 - [COX2_HUMAN]	91	3	1	3	20.26	25.5482	4.81787
Q14210	Lymphocyte antigen 6D OS=Homo sapiens GN=LY6D PE=1 SV=1 - [LY6D_HUMAN]	90	4	1	4	27.34	13.2777	8.20654
O95716	Ras-related protein Rab-3D OS=Homo sapiens GN=RAB3D PE=1 SV=1 - [RAB3D_HUMAN]	90	5	14	2	27.4	24.2518	4.93213
P30536	Translocator protein OS=Homo sapiens GN=TSPO PE=1 SV=3 - [TSPO_HUMAN]	89	3	1	3	28.4	18.8156	9.36377
P16152	Carbonyl reductase [NADPH] 1 OS=Homo sapiens GN=CBR1 PE=1 SV=3 - [CBR1_HUMAN]	88	9	2	9	39.71	30.3559	8.32373
Q08043	Alpha-actinin-3 OS=Homo sapiens GN=ACTN3 PE=1 SV=2 - [ACTN3_HUMAN]	88	16	1	6	17.54	103.176	5.51611
P10643	Complement component C7 OS=Homo sapiens GN=C7 PE=1 SV=2 - [CO7_HUMAN]	88	12	1	12	20.4	93.4573	6.48096
P62140	Serine/threonine-protein phosphatase PP1-beta catalytic subunit OS=Homo sapiens GN=PPP1CB PE=1 SV=3 - [PP1B_HUMAN]	86	11	1	3	38.53	37.1626	6.18896
P19878	Neutrophil cytosol factor 2 OS=Homo sapiens GN=NCF2 PE=1 SV=2 - [NCF2_HUMAN]	86	13	2	13	27.57	59.7235	6.16357
O75015	Low affinity immunoglobulin gamma Fc region receptor III-B OS=Homo sapiens GN=FCGR3B PE=1 SV=2 - [FCG3B_HUMAN]	86	5	1	3	21.89	26.1992	6.7124
Q99935	Opiorphin prepropeptide OS=Homo sapiens GN=OPRPN PE=1 SV=2 - [PROL1_HUMAN]	86	5	1	5	30.65	27.1994	10.4185
P23141	Liver carboxylesterase 1 OS=Homo sapiens GN=CES1 PE=1 SV=2 - [EST1_HUMAN]	85	12	1	9	26.28	62.4812	6.59521
Q14739	Lamin-B receptor OS=Homo sapiens GN=LBR PE=1 SV=2 - [LBR_HUMAN]	85	5	1	5	8.46	70.658	9.36377
O95498	Vascular non-inflammatory molecule 2 OS=Homo sapiens GN=VNN2 PE=1 SV=3 - [VNN2_HUMAN]	85	6	1	6	20.19	58.4655	6.52197
Q12805	EGF-containing fibulin-like extracellular matrix protein 1 OS=Homo sapiens GN=EFEMP1 PE=1 SV=2 - [FBLN3_HUMAN]	85	10	1	10	26.37	54.6042	5.07178
Q9UJ70	N-acetyl-D-glucosamine kinase OS=Homo sapiens GN=NAGK PE=1 SV=4 - [NAGK_HUMAN]	85	10	1	10	36.92	37.3519	6.23975
Q8TCT9	Minor histocompatibility antigen H13 OS=Homo sapiens GN=HM13 PE=1 SV=1 - [HM13_HUMAN]	84	2	1	2	5.04	41.4616	6.43018
P22626	Heterogeneous nuclear ribonucleoproteins A2/B1 OS=Homo sapiens GN=HNRNPA2B1 PE=1 SV=2 - [ROA2_HUMAN]	84	9	3	8	23.23	37.4067	8.95361
P14555	Phospholipase A2, membrane associated OS=Homo sapiens GN=PLA2G2A PE=1 SV=2 - [PA2GA_HUMAN]	84	8	1	8	40.97	16.0718	9.23193
Q53GD3	Choline transporter-like protein 4 OS=Homo sapiens GN=SLC44A4 PE=2 SV=2 - [CTL4_HUMAN]	84	6	1	6	8.87	79.2014	8.5874
Q14515	SPARC-like protein 1 OS=Homo sapiens GN=SPARCL1 PE=1 SV=2 - [SPRL1_HUMAN]	83	8	1	8	16.27	75.1613	4.80518
P10163	Basic salivary proline-rich protein 4 OS=Homo sapiens GN=PRB4 PE=1 SV=4 - [PRB4_HUMAN]	83	13	1	12	37.42	31.3068	10.521
Q06323	Proteasome activator complex subunit 1 OS=Homo sapiens GN=PSME1 PE=1 SV=1 - [PSME1_HUMAN]	82	8	1	8	38.15	28.705	6.02393
Q10567	AP-1 complex subunit beta-1 OS=Homo sapiens GN=AP1B1 PE=1 SV=2 - [AP1B1_HUMAN]	82	7	1	4	9.91	104.57	5.05908
P02812	Basic salivary proline-rich protein 2 OS=Homo sapiens GN=PRB2 PE=1 SV=3 - [PRB2_HUMAN]	81	8	2	7	66.59	40.7748	11.6343
P30153	Serine/threonine-protein phosphatase 2A 65 kDa regulatory subunit A alpha isoform OS=Homo sapiens GN=PPP2R1A PE=1 SV=4 - [2AAA_HUMAN]	81	5	2	5	13.07	65.2669	5.10986
Q99714	3-hydroxyacyl-CoA dehydrogenase type-2 OS=Homo sapiens GN=HSD17B10 PE=1 SV=3 - [HCD2_HUMAN]	81	5	1	5	29.5	26.9061	7.78174
P23396	40S ribosomal protein S3 OS=Homo sapiens GN=RPS3 PE=1 SV=2 - [RS3_HUMAN]	80	11	1	11	39.92	26.6714	9.65674
P08865	40S ribosomal protein SA OS=Homo sapiens GN=RPSA PE=1 SV=4 - [RSSA_HUMAN]	80	7	1	6	27.46	32.8334	4.86865
Q8NC42	E3 ubiquitin-protein ligase RNF149 OS=Homo sapiens GN=RNF149 PE=2 SV=2 - [RN149_HUMAN]	80	2	1	2	3.25	43.137	6.53662
Q9UPZ9	Serine/threonine-protein kinase ICK OS=Homo sapiens GN=ICK PE=1 SV=1 - [ICK_HUMAN]	80	3	22	2	5.38	71.382	9.77393
P11362	Fibroblast growth factor receptor 1 OS=Homo sapiens GN=FGFR1 PE=1 SV=3 - [FGFR1_HUMAN]	80	3	22	2	4.87	91.8089	6.21436
P35232	Prohibitin OS=Homo sapiens GN=PHB PE=1 SV=1 - [PHB_HUMAN]	78	5	1	5	19.49	29.7859	5.75732
P43652	Afamin OS=Homo sapiens GN=AFM PE=1 SV=1 - [AFAM_HUMAN]	78	12	1	12	20.53	69.024	5.89697
Q9H299	SH3 domain-binding glutamic acid-rich-like protein 3 OS=Homo sapiens GN=SH3BGRL3 PE=1 SV=1 - [SH3L3_HUMAN]	78	4	1	4	75.27	10.4313	4.93213
Q9H4M9	EH domain-containing protein 1 OS=Homo sapiens GN=EHD1 PE=1 SV=2 - [EHD1_HUMAN]	77	16	3	15	35.58	60.5887	6.82959
O95436	Sodium-dependent phosphate transport protein 2B OS=Homo sapiens GN=SLC34A2 PE=1 SV=3 - [NPT2B_HUMAN]	77	9	1	9	16.81	75.7096	8.14795
Q9Y5Z4	Heme-binding protein 2 OS=Homo sapiens GN=HEBP2 PE=1 SV=1 - [HEBP2_HUMAN]	76	6	1	6	29.76	22.8612	4.62744
P01699	Ig lambda chain V-I region VOR OS=Homo sapiens PE=1 SV=1 - [LV101_HUMAN]	76	4	1	3	44.14	11.5075	5.2876
P19021	Peptidyl-glycine alpha-amidating monooxygenase OS=Homo sapiens GN=PAM PE=1 SV=2 - [AMD_HUMAN]	76	9	1	9	12.33	108.263	6.41748
P13284	Gamma-interferon-inducible lysosomal thiol reductase OS=Homo sapiens GN=IFI30 PE=1 SV=3 - [GILT_HUMAN]	76	3	1	3	30	27.945	4.88135
Q5TZA2	Rootletin OS=Homo sapiens GN=CROCC PE=1 SV=1 - [CROCC_HUMAN]	75	4	1	3	1.88	228.388	5.50342
P35222	Catenin beta-1 OS=Homo sapiens GN=CTNNB1 PE=1 SV=1 - [CTNB1_HUMAN]	75	8	1	3	10.12	85.4422	5.85889
O75955	Flotillin-1 OS=Homo sapiens GN=FLOT1 PE=1 SV=3 - [FLOT1_HUMAN]	75	9	1	9	29.04	47.3256	7.48877
P19823	Inter-alpha-trypsin inhibitor heavy chain H2 OS=Homo sapiens GN=ITIH2 PE=1 SV=2 - [ITIH2_HUMAN]	74	8	2	8	9.73	106.397	6.85889
Q15063	Periostin OS=Homo sapiens GN=POSTN PE=1 SV=2 - [POSTN_HUMAN]	74	10	1	10	16.63	93.2553	7.53271
P24752	Acetyl-CoA acetyltransferase, mitochondrial OS=Homo sapiens GN=ACAT1 PE=1 SV=1 - [THIL_HUMAN]	74	5	1	5	12.65	45.1706	8.85107
P62244	40S ribosomal protein S15a OS=Homo sapiens GN=RPS15A PE=1 SV=2 - [RS15A_HUMAN]	73	4	1	4	25.38	14.83	10.1255
P31150	Rab GDP dissociation inhibitor alpha OS=Homo sapiens GN=GDI1 PE=1 SV=2 - [GDIA_HUMAN]	73	9	1	4	22.15	50.5501	5.13525
P20073	Annexin A7 OS=Homo sapiens GN=ANXA7 PE=1 SV=3 - [ANXA7_HUMAN]	72	10	1	9	21.31	52.7058	5.68115
Q9Y2J8	Protein-arginine deiminase type-2 OS=Homo sapiens GN=PADI2 PE=1 SV=2 - [PADI2_HUMAN]	72	7	1	7	13.53	75.5153	5.59229
P62136	Serine/threonine-protein phosphatase PP1-alpha catalytic subunit OS=Homo sapiens GN=PPP1CA PE=1 SV=1 - [PP1A_HUMAN]	71	10	2	2	33.33	37.4878	6.32861
P30050	60S ribosomal protein L12 OS=Homo sapiens GN=RPL12 PE=1 SV=1 - [RL12_HUMAN]	70	3	1	3	24.85	17.8075	9.42236
Q92542	Nicastrin OS=Homo sapiens GN=NCSTN PE=1 SV=2 - [NICA_HUMAN]	70	4	1	4	5.92	78.3615	5.98584
Q14764	Major vault protein OS=Homo sapiens GN=MVP PE=1 SV=4 - [MVP_HUMAN]	70	11	1	11	18.81	99.2659	5.47803
O75695	Protein XRP2 OS=Homo sapiens GN=RP2 PE=1 SV=4 - [XRP2_HUMAN]	70	4	1	4	8.29	39.6155	5.12256
Q02818	Nucleobindin-1 OS=Homo sapiens GN=NUCB1 PE=1 SV=4 - [NUCB1_HUMAN]	69	9	1	8	22.78	53.8463	5.24951
P49411	Elongation factor Tu, mitochondrial OS=Homo sapiens GN=TUFM PE=1 SV=2 - [EFTU_HUMAN]	68	6	2	5	14.6	49.5102	7.60596
O95994	Anterior gradient protein 2 homolog OS=Homo sapiens GN=AGR2 PE=1 SV=1 - [AGR2_HUMAN]	68	3	1	2	16.57	19.9666	8.99756
P99999	Cytochrome c OS=Homo sapiens GN=CYCS PE=1 SV=2 - [CYC_HUMAN]	68	4	1	4	39.05	11.7411	9.56885
A6NIZ1	Ras-related protein Rap-1b-like protein OS=Homo sapiens PE=2 SV=1 - [RP1BL_HUMAN]	68	6	1	3	38.59	20.9116	5.47803
Q15907	Ras-related protein Rab-11B OS=Homo sapiens GN=RAB11B PE=1 SV=4 - [RB11B_HUMAN]	68	6	2	6	28.44	24.4735	5.93506
O96009	Napsin-A OS=Homo sapiens GN=NAPSA PE=1 SV=1 - [NAPSA_HUMAN]	68	7	1	7	29.05	45.3578	6.60986
P16050	Arachidonate 15-lipoxygenase OS=Homo sapiens GN=ALOX15 PE=1 SV=3 - [LOX15_HUMAN]	68	19	1	19	34.59	74.7565	6.58057
O95336	6-phosphogluconolactonase OS=Homo sapiens GN=PGLS PE=1 SV=2 - [6PGL_HUMAN]	67	8	1	8	43.8	27.5296	6.04932
P61604	10 kDa heat shock protein, mitochondrial OS=Homo sapiens GN=HSPE1 PE=1 SV=2 - [CH10_HUMAN]	67	5	1	5	43.14	10.9249	8.92432
P11217	Glycogen phosphorylase, muscle form OS=Homo sapiens GN=PYGM PE=1 SV=6 - [PYGM_HUMAN]	66	10	1	6	13.42	97.0306	7.03467
Q06828	Fibromodulin OS=Homo sapiens GN=FMOD PE=1 SV=2 - [FMOD_HUMAN]	66	2	1	2	3.99	43.1515	6.03662
Q9H4G4	Golgi-associated plant pathogenesis-related protein 1 OS=Homo sapiens GN=GLIPR2 PE=1 SV=3 - [GAPR1_HUMAN]	66	6	1	6	55.19	17.2075	9.40771
P20674	Cytochrome c oxidase subunit 5A, mitochondrial OS=Homo sapiens GN=COX5A PE=1 SV=2 - [COX5A_HUMAN]	66	7	4	7	57.33	16.7517	6.78564
P09668	Pro-cathepsin H OS=Homo sapiens GN=CTSH PE=1 SV=4 - [CATH_HUMAN]	66	7	1	7	23.28	37.369	8.07471
Q9NZ08	Endoplasmic reticulum aminopeptidase 1 OS=Homo sapiens GN=ERAP1 PE=1 SV=3 - [ERAP1_HUMAN]	66	6	1	6	9.78	107.166	6.45557
P61106	Ras-related protein Rab-14 OS=Homo sapiens GN=RAB14 PE=1 SV=4 - [RAB14_HUMAN]	66	5	12	4	34.88	23.8819	6.21436
P55064	Aquaporin-5 OS=Homo sapiens GN=AQP5 PE=1 SV=1 - [AQP5_HUMAN]	65	2	1	2	9.81	28.2741	8.6167
Q15366	Poly(rC)-binding protein 2 OS=Homo sapiens GN=PCBP2 PE=1 SV=1 - [PCBP2_HUMAN]	65	3	2	3	11.78	38.5556	6.78564
P02753	Retinol-binding protein 4 OS=Homo sapiens GN=RBP4 PE=1 SV=3 - [RET4_HUMAN]	65	5	1	5	28.36	22.9953	6.07471
Q99439	Calponin-2 OS=Homo sapiens GN=CNN2 PE=1 SV=4 - [CNN2_HUMAN]	65	7	1	7	25.57	33.6753	7.32764
P25398	40S ribosomal protein S12 OS=Homo sapiens GN=RPS12 PE=1 SV=3 - [RS12_HUMAN]	64	5	1	5	32.58	14.5055	7.21045
P29350	Tyrosine-protein phosphatase non-receptor type 6 OS=Homo sapiens GN=PTPN6 PE=1 SV=1 - [PTN6_HUMAN]	64	15	1	15	30.08	67.5191	7.78174
Q13404	Ubiquitin-conjugating enzyme E2 variant 1 OS=Homo sapiens GN=UBE2V1 PE=1 SV=2 - [UB2V1_HUMAN]	64	5	2	5	27.89	16.4843	7.92822
P02730	Band 3 anion transport protein OS=Homo sapiens GN=SLC4A1 PE=1 SV=3 - [B3AT_HUMAN]	64	12	1	12	19.43	101.727	5.18604
P25789	Proteasome subunit alpha type-4 OS=Homo sapiens GN=PSMA4 PE=1 SV=1 - [PSA4_HUMAN]	64	3	4	3	17.62	29.4652	7.72314
P46782	40S ribosomal protein S5 OS=Homo sapiens GN=RPS5 PE=1 SV=4 - [RS5_HUMAN]	63	3	1	3	17.65	22.8621	9.71533
A6NCW0	Ubiquitin carboxyl-terminal hydrolase 17-like protein 3 OS=Homo sapiens GN=USP17L3 PE=3 SV=1 - [U17L3_HUMAN]	63	2	17	2	6.23	59.4975	7.73779
P27487	Dipeptidyl peptidase 4 OS=Homo sapiens GN=DPP4 PE=1 SV=2 - [DPP4_HUMAN]	63	13	1	13	19.32	88.2225	6.03662
P07910	Heterogeneous nuclear ribonucleoproteins C1/C2 OS=Homo sapiens GN=HNRNPC PE=1 SV=4 - [HNRPC_HUMAN]	63	6	5	4	19.28	33.6495	5.08447
Q13938	Calcyphosin OS=Homo sapiens GN=CAPS PE=1 SV=1 - [CAYP1_HUMAN]	63	7	1	7	39.15	20.9543	4.89404
Q99536	Synaptic vesicle membrane protein VAT-1 homolog OS=Homo sapiens GN=VAT1 PE=1 SV=2 - [VAT1_HUMAN]	62	8	1	8	27.23	41.8934	6.29053
P29622	Kallistatin OS=Homo sapiens GN=SERPINA4 PE=1 SV=3 - [KAIN_HUMAN]	62	7	1	7	17.33	48.5112	7.75244
P00734	Prothrombin OS=Homo sapiens GN=F2 PE=1 SV=2 - [THRB_HUMAN]	62	8	1	8	20.42	69.9921	5.89697
P22352	Glutathione peroxidase 3 OS=Homo sapiens GN=GPX3 PE=1 SV=2 - [GPX3_HUMAN]	61	3	1	3	16.37	25.5369	8.1333
Q01082	Spectrin beta chain, non-erythrocytic 1 OS=Homo sapiens GN=SPTBN1 PE=1 SV=2 - [SPTB2_HUMAN]	61	12	1	10	6.68	274.439	5.56689
P15328	Folate receptor alpha OS=Homo sapiens GN=FOLR1 PE=1 SV=3 - [FOLR1_HUMAN]	61	8	1	8	35.02	29.7992	7.97217
P12109	Collagen alpha-1(VI) chain OS=Homo sapiens GN=COL6A1 PE=1 SV=3 - [CO6A1_HUMAN]	60	7	1	7	9.63	108.462	5.42725
P25788	Proteasome subunit alpha type-3 OS=Homo sapiens GN=PSMA3 PE=1 SV=2 - [PSA3_HUMAN]	60	3	1	3	12.16	28.4151	5.32568
P29692	Elongation factor 1-delta OS=Homo sapiens GN=EEF1D PE=1 SV=5 - [EF1D_HUMAN]	60	6	1	4	26.33	31.1028	5.0083
P07099	Epoxide hydrolase 1 OS=Homo sapiens GN=EPHX1 PE=1 SV=1 - [HYEP_HUMAN]	60	7	1	7	23.96	52.915	7.25439
P78324	Tyrosine-protein phosphatase non-receptor type substrate 1 OS=Homo sapiens GN=SIRPA PE=1 SV=2 - [SHPS1_HUMAN]	60	7	3	5	14.29	54.9328	6.97607
P62851	40S ribosomal protein S25 OS=Homo sapiens GN=RPS25 PE=1 SV=1 - [RS25_HUMAN]	59	4	1	4	28	13.7337	10.1108
P63167	Dynein light chain 1, cytoplasmic OS=Homo sapiens GN=DYNLL1 PE=1 SV=1 - [DYL1_HUMAN]	59	4	2	4	26.97	10.3591	7.40088
Q9NYL9	Tropomodulin-3 OS=Homo sapiens GN=TMOD3 PE=1 SV=1 - [TMOD3_HUMAN]	59	4	2	4	10.51	39.5703	5.18604
P26022	Pentraxin-related protein PTX3 OS=Homo sapiens GN=PTX3 PE=1 SV=3 - [PTX3_HUMAN]	59	7	1	7	25.2	41.9488	5.0083
Q96Q06	Perilipin-4 OS=Homo sapiens GN=PLIN4 PE=1 SV=2 - [PLIN4_HUMAN]	59	2	1	2	4.05	134.349	8.73389
P11940	Polyadenylate-binding protein 1 OS=Homo sapiens GN=PABPC1 PE=1 SV=2 - [PABP1_HUMAN]	58	4	5	4	7.7	70.6259	9.49561
O15260	Surfeit locus protein 4 OS=Homo sapiens GN=SURF4 PE=1 SV=3 - [SURF4_HUMAN]	58	3	1	3	11.15	30.3738	7.78174
P13671	Complement component C6 OS=Homo sapiens GN=C6 PE=1 SV=3 - [CO6_HUMAN]	58	11	1	11	16.81	104.718	6.75635
P14314	Glucosidase 2 subunit beta OS=Homo sapiens GN=PRKCSH PE=1 SV=2 - [GLU2B_HUMAN]	57	13	1	13	26.14	59.3878	4.41162
P06865	Beta-hexosaminidase subunit alpha OS=Homo sapiens GN=HEXA PE=1 SV=2 - [HEXA_HUMAN]	57	5	1	5	11.72	60.6643	5.16064
P46063	ATP-dependent DNA helicase Q1 OS=Homo sapiens GN=RECQL PE=1 SV=3 - [RECQ1_HUMAN]	57	2	1	2	4.16	73.41	7.88428
P62318	Small nuclear ribonucleoprotein Sm D3 OS=Homo sapiens GN=SNRPD3 PE=1 SV=1 - [SMD3_HUMAN]	56	2	1	2	15.08	13.9073	10.3159
Q6IBS0	Twinfilin-2 OS=Homo sapiens GN=TWF2 PE=1 SV=2 - [TWF2_HUMAN]	56	3	1	2	9.74	39.5233	6.84424
P00492	Hypoxanthine-guanine phosphoribosyltransferase OS=Homo sapiens GN=HPRT1 PE=1 SV=2 - [HPRT_HUMAN]	56	5	2	5	23.39	24.5636	6.68311
P06732	Creatine kinase M-type OS=Homo sapiens GN=CKM PE=1 SV=2 - [KCRM_HUMAN]	56	7	1	7	28.08	43.0739	7.25439
P55786	Puromycin-sensitive aminopeptidase OS=Homo sapiens GN=NPEPPS PE=1 SV=2 - [PSA_HUMAN]	55	11	2	11	14.58	103.211	5.71924
P62241	40S ribosomal protein S8 OS=Homo sapiens GN=RPS8 PE=1 SV=2 - [RS8_HUMAN]	55	6	1	6	35.1	24.1902	10.3159
Q9Y446	Plakophilin-3 OS=Homo sapiens GN=PKP3 PE=1 SV=1 - [PKP3_HUMAN]	55	9	1	9	12.3	87.029	9.31982
P51148	Ras-related protein Rab-5C OS=Homo sapiens GN=RAB5C PE=1 SV=2 - [RAB5C_HUMAN]	55	5	2	2	27.78	23.4678	8.41162
Q14974	Importin subunit beta-1 OS=Homo sapiens GN=KPNB1 PE=1 SV=2 - [IMB1_HUMAN]	55	8	1	8	11.87	97.108	4.77979
O14773	Tripeptidyl-peptidase 1 OS=Homo sapiens GN=TPP1 PE=1 SV=2 - [TPP1_HUMAN]	55	4	1	4	12.26	61.2096	6.48096
P17900	Ganglioside GM2 activator OS=Homo sapiens GN=GM2A PE=1 SV=4 - [SAP3_HUMAN]	55	5	1	5	29.53	20.8247	5.31299
O75376	Nuclear receptor corepressor 1 OS=Homo sapiens GN=NCOR1 PE=1 SV=2 - [NCOR1_HUMAN]	54	3	1	3	2.01	270.044	7.10791
Q9NUQ9	Protein FAM49B OS=Homo sapiens GN=FAM49B PE=1 SV=1 - [FA49B_HUMAN]	54	8	1	8	28.7	36.7246	6.06201
P11169	Solute carrier family 2, facilitated glucose transporter member 3 OS=Homo sapiens GN=SLC2A3 PE=1 SV=1 - [GTR3_HUMAN]	54	5	2	5	11.29	53.8893	7.1958
Q16698	2,4-dienoyl-CoA reductase, mitochondrial OS=Homo sapiens GN=DECR1 PE=1 SV=1 - [DECR_HUMAN]	54	5	1	5	17.61	36.0448	9.27588
Q9BSJ2	Gamma-tubulin complex component 2 OS=Homo sapiens GN=TUBGCP2 PE=1 SV=2 - [GCP2_HUMAN]	54	2	1	2	2	102.469	6.84424
P12532	Creatine kinase U-type, mitochondrial OS=Homo sapiens GN=CKMT1A PE=1 SV=1 - [KCRU_HUMAN]	54	6	1	5	26.38	47.0072	8.33838
P35900	Keratin, type I cytoskeletal 20 OS=Homo sapiens GN=KRT20 PE=1 SV=1 - [K1C20_HUMAN]	54	5	1	2	9.2	48.4569	5.69385
Q08477	Docosahexaenoic acid omega-hydroxylase CYP4F3 OS=Homo sapiens GN=CYP4F3 PE=1 SV=2 - [CP4F3_HUMAN]	53	9	5	9	20.19	59.8079	7.63525
P19971	Thymidine phosphorylase OS=Homo sapiens GN=TYMP PE=1 SV=2 - [TYPH_HUMAN]	53	10	1	10	29.88	49.9242	5.52881
Q6UWP8	Suprabasin OS=Homo sapiens GN=SBSN PE=1 SV=2 - [SBSN_HUMAN]	53	7	1	7	25.42	60.5046	7.00537
P62913	60S ribosomal protein L11 OS=Homo sapiens GN=RPL11 PE=1 SV=2 - [RL11_HUMAN]	52	2	1	2	12.36	20.2396	9.59814
Q07020	60S ribosomal protein L18 OS=Homo sapiens GN=RPL18 PE=1 SV=2 - [RL18_HUMAN]	52	6	1	6	34.57	21.6211	11.7222
P38646	Stress-70 protein, mitochondrial OS=Homo sapiens GN=HSPA9 PE=1 SV=2 - [GRP75_HUMAN]	52	12	11	9	18.41	73.6348	6.16357
Q15782	Chitinase-3-like protein 2 OS=Homo sapiens GN=CHI3L2 PE=1 SV=1 - [CH3L2_HUMAN]	52	8	1	8	30	43.473	7.53271
P09669	Cytochrome c oxidase subunit 6C OS=Homo sapiens GN=COX6C PE=1 SV=2 - [COX6C_HUMAN]	52	2	1	2	20	8.77569	10.3892
P49720	Proteasome subunit beta type-3 OS=Homo sapiens GN=PSMB3 PE=1 SV=2 - [PSB3_HUMAN]	52	3	1	3	20	22.9335	6.55127
P40939	Trifunctional enzyme subunit alpha, mitochondrial OS=Homo sapiens GN=HADHA PE=1 SV=2 - [ECHA_HUMAN]	52	12	1	12	18.09	82.9469	9.0415
P48047	ATP synthase subunit O, mitochondrial OS=Homo sapiens GN=ATP5O PE=1 SV=1 - [ATPO_HUMAN]	52	4	1	4	23.47	23.2627	9.96436
P46783	40S ribosomal protein S10 OS=Homo sapiens GN=RPS10 PE=1 SV=1 - [RS10_HUMAN]	52	4	1	4	33.94	18.8859	10.1548
Q96QK1	Vacuolar protein sorting-associated protein 35 OS=Homo sapiens GN=VPS35 PE=1 SV=2 - [VPS35_HUMAN]	52	8	1	8	11.31	91.6489	5.49072
P00918	Carbonic anhydrase 2 OS=Homo sapiens GN=CA2 PE=1 SV=2 - [CAH2_HUMAN]	52	7	1	7	36.15	29.2279	7.40088
P39656	Dolichyl-diphosphooligosaccharide--protein glycosyltransferase 48 kDa subunit OS=Homo sapiens GN=DDOST PE=1 SV=4 - [OST48_HUMAN]	51	9	1	9	26.54	50.769	6.55127
P22234	Multifunctional protein ADE2 OS=Homo sapiens GN=PAICS PE=1 SV=3 - [PUR6_HUMAN]	51	4	1	4	17.65	47.0491	7.2251
P01707	Ig lambda chain V-II region TRO OS=Homo sapiens PE=1 SV=1 - [LV204_HUMAN]	51	4	1	3	35.14	11.5536	8.29443
P05156	Complement factor I OS=Homo sapiens GN=CFI PE=1 SV=2 - [CFAI_HUMAN]	51	6	1	6	10.29	65.7066	7.50342
Q8N8E3	Centrosomal protein of 112 kDa OS=Homo sapiens GN=CEP112 PE=1 SV=2 - [CE112_HUMAN]	51	2	1	2	2.3	112.679	6.68311
P36871	Phosphoglucomutase-1 OS=Homo sapiens GN=PGM1 PE=1 SV=3 - [PGM1_HUMAN]	51	6	1	6	14.06	61.4105	6.75635
O00560	Syntenin-1 OS=Homo sapiens GN=SDCBP PE=1 SV=1 - [SDCB1_HUMAN]	50	6	1	6	38.26	32.4239	7.53271
P48637	Glutathione synthetase OS=Homo sapiens GN=GSS PE=1 SV=1 - [GSHB_HUMAN]	50	6	1	6	12.03	52.3523	5.92236
P05186	Alkaline phosphatase, tissue-nonspecific isozyme OS=Homo sapiens GN=ALPL PE=1 SV=4 - [PPBT_HUMAN]	50	6	1	6	14.69	57.2686	6.66846
P17927	Complement receptor type 1 OS=Homo sapiens GN=CR1 PE=1 SV=3 - [CR1_HUMAN]	50	4	2	4	4.76	223.517	6.94678
P62826	GTP-binding nuclear protein Ran OS=Homo sapiens GN=RAN PE=1 SV=3 - [RAN_HUMAN]	49	7	1	7	31.48	24.4076	7.48877
P18428	Lipopolysaccharide-binding protein OS=Homo sapiens GN=LBP PE=1 SV=3 - [LBP_HUMAN]	49	6	1	6	15.8	53.3499	6.69775
Q9NTK5	Obg-like ATPase 1 OS=Homo sapiens GN=OLA1 PE=1 SV=2 - [OLA1_HUMAN]	49	3	1	3	8.84	44.7153	7.81104
Q16635	Tafazzin OS=Homo sapiens GN=TAZ PE=1 SV=1 - [TAZ_HUMAN]	49	2	1	2	18.84	33.4372	8.90967
P05120	Plasminogen activator inhibitor 2 OS=Homo sapiens GN=SERPINB2 PE=1 SV=2 - [PAI2_HUMAN]	48	6	1	6	18.31	46.5661	5.63037
P84095	Rho-related GTP-binding protein RhoG OS=Homo sapiens GN=RHOG PE=1 SV=1 - [RHOG_HUMAN]	48	6	2	5	48.69	21.2949	8.11865
P30086	Phosphatidylethanolamine-binding protein 1 OS=Homo sapiens GN=PEBP1 PE=1 SV=3 - [PEBP1_HUMAN]	48	7	1	7	50.27	21.0437	7.53271
Q99497	Protein deglycase DJ-1 OS=Homo sapiens GN=PARK7 PE=1 SV=2 - [PARK7_HUMAN]	48	9	1	9	58.73	19.8785	6.78564
O75340	Programmed cell death protein 6 OS=Homo sapiens GN=PDCD6 PE=1 SV=1 - [PDCD6_HUMAN]	48	5	1	5	36.65	21.8548	5.40186
P55084	Trifunctional enzyme subunit beta, mitochondrial OS=Homo sapiens GN=HADHB PE=1 SV=3 - [ECHB_HUMAN]	48	8	1	8	18.14	51.2615	9.40771
O60309	Leucine-rich repeat-containing protein 37A3 OS=Homo sapiens GN=LRRC37A3 PE=2 SV=2 - [L37A3_HUMAN]	47	3	3	3	0.98	180.509	5.31299
P13073	Cytochrome c oxidase subunit 4 isoform 1, mitochondrial OS=Homo sapiens GN=COX4I1 PE=1 SV=1 - [COX41_HUMAN]	47	5	1	5	27.81	19.564	9.51025
P28838	Cytosol aminopeptidase OS=Homo sapiens GN=LAP3 PE=1 SV=3 - [AMPL_HUMAN]	47	5	1	5	13.87	56.1308	7.92822
P62269	40S ribosomal protein S18 OS=Homo sapiens GN=RPS18 PE=1 SV=3 - [RS18_HUMAN]	47	6	1	6	33.55	17.7079	10.9897
P34059	N-acetylgalactosamine-6-sulfatase OS=Homo sapiens GN=GALNS PE=1 SV=1 - [GALNS_HUMAN]	47	3	1	3	6.51	57.9891	6.7417
Q7Z4W1	L-xylulose reductase OS=Homo sapiens GN=DCXR PE=1 SV=2 - [DCXR_HUMAN]	47	3	1	3	20.08	25.8966	8.104
Q9NR09	Baculoviral IAP repeat-containing protein 6 OS=Homo sapiens GN=BIRC6 PE=1 SV=2 - [BIRC6_HUMAN]	47	2	1	2	1.17	529.919	6.04932
P01603	Ig kappa chain V-I region Ka OS=Homo sapiens PE=1 SV=1 - [KV111_HUMAN]	46	6	1	4	41.67	11.8924	8.85107
P07998	Ribonuclease pancreatic OS=Homo sapiens GN=RNASE1 PE=1 SV=4 - [RNAS1_HUMAN]	46	4	1	4	45.51	17.6327	8.79248
P49327	Fatty acid synthase OS=Homo sapiens GN=FASN PE=1 SV=3 - [FAS_HUMAN]	46	15	2	15	7.73	273.254	6.44287
Q70J99	Protein unc-13 homolog D OS=Homo sapiens GN=UNC13D PE=1 SV=1 - [UN13D_HUMAN]	46	8	1	8	12.02	123.205	6.65381
P52272	Heterogeneous nuclear ribonucleoprotein M OS=Homo sapiens GN=HNRNPM PE=1 SV=3 - [HNRPM_HUMAN]	46	3	1	3	3.97	77.4643	8.70459
Q9C075	Keratin, type I cytoskeletal 23 OS=Homo sapiens GN=KRT23 PE=1 SV=2 - [K1C23_HUMAN]	46	4	1	3	10.43	48.1012	6.53662
Q9BQR3	Serine protease 27 OS=Homo sapiens GN=PRSS27 PE=1 SV=1 - [PRS27_HUMAN]	45	2	1	2	6.55	31.9191	8.1333
Q8WXE1	ATR-interacting protein OS=Homo sapiens GN=ATRIP PE=1 SV=1 - [ATRIP_HUMAN]	45	2	1	2	3.16	85.7835	6.31592
P08236	Beta-glucuronidase OS=Homo sapiens GN=GUSB PE=1 SV=2 - [BGLR_HUMAN]	45	9	1	9	15.36	74.6847	7.02002
P57088	Transmembrane protein 33 OS=Homo sapiens GN=TMEM33 PE=1 SV=2 - [TMM33_HUMAN]	45	4	1	4	14.57	27.9598	9.70068
P15291	Beta-1,4-galactosyltransferase 1 OS=Homo sapiens GN=B4GALT1 PE=1 SV=5 - [B4GT1_HUMAN]	45	4	2	4	15.08	43.8923	8.646
P10606	Cytochrome c oxidase subunit 5B, mitochondrial OS=Homo sapiens GN=COX5B PE=1 SV=2 - [COX5B_HUMAN]	44	2	1	2	15.5	13.6869	8.80713
P49748	Very long-chain specific acyl-CoA dehydrogenase, mitochondrial OS=Homo sapiens GN=ACADVL PE=1 SV=1 - [ACADV_HUMAN]	44	6	1	6	12.82	70.3454	8.74854
Q9Y678	Coatomer subunit gamma-1 OS=Homo sapiens GN=COPG1 PE=1 SV=1 - [COPG1_HUMAN]	44	4	1	3	6.52	97.6555	5.46533
P20930	Filaggrin OS=Homo sapiens GN=FLG PE=1 SV=3 - [FILA_HUMAN]	43	6	1	6	5.71	434.922	9.24658
Q92673	Sortilin-related receptor OS=Homo sapiens GN=SORL1 PE=1 SV=2 - [SORL_HUMAN]	43	4	1	4	1.76	248.267	5.5542
P49902	Cytosolic purine 5'-nucleotidase OS=Homo sapiens GN=NT5C2 PE=1 SV=1 - [5NTC_HUMAN]	43	6	1	6	11.59	64.9283	6.13818
O00571	ATP-dependent RNA helicase DDX3X OS=Homo sapiens GN=DDX3X PE=1 SV=3 - [DDX3X_HUMAN]	43	5	2	5	10.88	73.198	7.18115
Q9NUJ7	PI-PLC X domain-containing protein 1 OS=Homo sapiens GN=PLCXD1 PE=2 SV=1 - [PLCX1_HUMAN]	43	2	1	2	4.64	36.6445	6.58057
P51587	Breast cancer type 2 susceptibility protein OS=Homo sapiens GN=BRCA2 PE=1 SV=3 - [BRCA2_HUMAN]	42	3	1	3	1.9	383.963	6.7124
P08590	Myosin light chain 3 OS=Homo sapiens GN=MYL3 PE=1 SV=3 - [MYL3_HUMAN]	42	4	1	2	27.18	21.9179	5.09717
O94905	Erlin-2 OS=Homo sapiens GN=ERLIN2 PE=1 SV=1 - [ERLN2_HUMAN]	42	6	1	4	23.01	37.8155	5.61768
Q05655	Protein kinase C delta type OS=Homo sapiens GN=PRKCD PE=1 SV=2 - [KPCD_HUMAN]	42	8	1	8	14.64	77.4549	7.75244
Q9BSJ8	Extended synaptotagmin-1 OS=Homo sapiens GN=ESYT1 PE=1 SV=1 - [ESYT1_HUMAN]	42	5	1	5	6.61	122.78	5.8335
O60218	Aldo-keto reductase family 1 member B10 OS=Homo sapiens GN=AKR1B10 PE=1 SV=2 - [AK1BA_HUMAN]	41	9	2	9	28.48	35.9968	7.84033
O95274	Ly6/PLAUR domain-containing protein 3 OS=Homo sapiens GN=LYPD3 PE=1 SV=2 - [LYPD3_HUMAN]	41	6	1	6	24.28	35.9476	7.75244
P05204	Non-histone chromosomal protein HMG-17 OS=Homo sapiens GN=HMGN2 PE=1 SV=3 - [HMGN2_HUMAN]	41	5	1	5	51.11	9.38706	9.99365
P49721	Proteasome subunit beta type-2 OS=Homo sapiens GN=PSMB2 PE=1 SV=1 - [PSB2_HUMAN]	41	3	1	3	14.43	22.8217	7.02002
Q5T7W0	Zinc finger protein 618 OS=Homo sapiens GN=ZNF618 PE=1 SV=1 - [ZN618_HUMAN]	41	2	1	2	2.94	104.889	7.09326
P19827	Inter-alpha-trypsin inhibitor heavy chain H1 OS=Homo sapiens GN=ITIH1 PE=1 SV=3 - [ITIH1_HUMAN]	41	9	1	9	13.39	101.326	6.78564
Q14315	Filamin-C OS=Homo sapiens GN=FLNC PE=1 SV=3 - [FLNC_HUMAN]	41	14	1	11	5.98	290.841	5.97314
P61247	40S ribosomal protein S3a OS=Homo sapiens GN=RPS3A PE=1 SV=2 - [RS3A_HUMAN]	40	7	1	7	25	29.9257	9.72998
Q9P225	Dynein heavy chain 2, axonemal OS=Homo sapiens GN=DNAH2 PE=2 SV=3 - [DYH2_HUMAN]	40	5	1	4	1.45	507.375	6.3667
P54819	Adenylate kinase 2, mitochondrial OS=Homo sapiens GN=AK2 PE=1 SV=2 - [KAD2_HUMAN]	39	6	1	6	34.73	26.4608	7.81104
P13760	HLA class II histocompatibility antigen, DRB1-4 beta chain OS=Homo sapiens GN=HLA-DRB1 PE=1 SV=1 - [2B14_HUMAN]	39	7	1	3	25.94	30.093	7.18115
O15533	Tapasin OS=Homo sapiens GN=TAPBP PE=1 SV=1 - [TPSN_HUMAN]	39	4	1	4	8.48	47.5957	7.15186
P83731	60S ribosomal protein L24 OS=Homo sapiens GN=RPL24 PE=1 SV=1 - [RL24_HUMAN]	39	5	1	5	30.57	17.7679	11.2534
O75874	Isocitrate dehydrogenase [NADP] cytoplasmic OS=Homo sapiens GN=IDH1 PE=1 SV=2 - [IDHC_HUMAN]	39	9	8	7	24.15	46.6295	7.00537
Q96GQ7	Probable ATP-dependent RNA helicase DDX27 OS=Homo sapiens GN=DDX27 PE=1 SV=2 - [DDX27_HUMAN]	39	2	1	2	2.64	89.7792	9.27588
Q03591	Complement factor H-related protein 1 OS=Homo sapiens GN=CFHR1 PE=1 SV=2 - [FHR1_HUMAN]	38	4	3	3	23.03	37.626	7.38623
Q9BRF8	Serine/threonine-protein phosphatase CPPED1 OS=Homo sapiens GN=CPPED1 PE=1 SV=3 - [CPPED_HUMAN]	38	5	1	5	17.52	35.5259	6.20166
Q8WWA0	Intelectin-1 OS=Homo sapiens GN=ITLN1 PE=1 SV=1 - [ITLN1_HUMAN]	38	5	2	5	22.36	34.9393	6.01123
Q13303	Voltage-gated potassium channel subunit beta-2 OS=Homo sapiens GN=KCNAB2 PE=1 SV=2 - [KCAB2_HUMAN]	38	8	1	8	41.96	40.974	8.99756
Q12913	Receptor-type tyrosine-protein phosphatase eta OS=Homo sapiens GN=PTPRJ PE=1 SV=3 - [PTPRJ_HUMAN]	38	5	1	5	3.89	145.851	5.57959
Q9UPN3	Microtubule-actin cross-linking factor 1, isoforms 1/2/3/5 OS=Homo sapiens GN=MACF1 PE=1 SV=4 - [MACF1_HUMAN]	38	8	1	8	1.77	837.787	5.38916
Q16881	Thioredoxin reductase 1, cytoplasmic OS=Homo sapiens GN=TXNRD1 PE=1 SV=3 - [TRXR1_HUMAN]	38	6	2	6	14.64	70.8622	7.38623
O75608	Acyl-protein thioesterase 1 OS=Homo sapiens GN=LYPLA1 PE=1 SV=1 - [LYPA1_HUMAN]	38	2	1	2	11.74	24.6535	6.771
O60664	Perilipin-3 OS=Homo sapiens GN=PLIN3 PE=1 SV=3 - [PLIN3_HUMAN]	38	9	1	9	30.65	47.0459	5.43994
P08519	Apolipoprotein(a) OS=Homo sapiens GN=LPA PE=1 SV=1 - [APOA_HUMAN]	38	5	1	5	26.01	500.995	5.88428
Q96A32	Myosin regulatory light chain 2, skeletal muscle isoform OS=Homo sapiens GN=MYLPF PE=2 SV=1 - [MLRS_HUMAN]	38	5	1	5	23.67	19.0024	5.0083
P07996	Thrombospondin-1 OS=Homo sapiens GN=THBS1 PE=1 SV=2 - [TSP1_HUMAN]	37	5	1	5	5.04	129.3	4.94482
Q9BS26	Endoplasmic reticulum resident protein 44 OS=Homo sapiens GN=ERP44 PE=1 SV=1 - [ERP44_HUMAN]	37	7	2	7	15.76	46.9414	5.26221
P00736	Complement C1r subcomponent OS=Homo sapiens GN=C1R PE=1 SV=2 - [C1R_HUMAN]	37	6	1	6	8.94	80.0668	6.21436
P42224	Signal transducer and activator of transcription 1-alpha/beta OS=Homo sapiens GN=STAT1 PE=1 SV=2 - [STAT1_HUMAN]	37	8	1	8	11.6	87.2795	6.04932
P62277	40S ribosomal protein S13 OS=Homo sapiens GN=RPS13 PE=1 SV=2 - [RS13_HUMAN]	37	7	1	7	35.76	17.2117	10.5356
Q9Y376	Calcium-binding protein 39 OS=Homo sapiens GN=CAB39 PE=1 SV=1 - [CAB39_HUMAN]	37	5	1	3	13.49	39.8437	6.88818
P19367	Hexokinase-1 OS=Homo sapiens GN=HK1 PE=1 SV=3 - [HXK1_HUMAN]	37	5	2	5	6	102.42	6.80029
P12111	Collagen alpha-3(VI) chain OS=Homo sapiens GN=COL6A3 PE=1 SV=5 - [CO6A3_HUMAN]	37	13	1	13	5.7	343.457	6.68311
P06319	Ig lambda chain V-VI region EB4 OS=Homo sapiens PE=2 SV=1 - [LV605_HUMAN]	36	3	2	2	32.82	14.1378	5.04639
P61020	Ras-related protein Rab-5B OS=Homo sapiens GN=RAB5B PE=1 SV=1 - [RAB5B_HUMAN]	36	5	2	2	34.42	23.6919	8.1333
Q14204	Cytoplasmic dynein 1 heavy chain 1 OS=Homo sapiens GN=DYNC1H1 PE=1 SV=5 - [DYHC1_HUMAN]	36	19	1	19	4.56	532.072	6.40479
P32320	Cytidine deaminase OS=Homo sapiens GN=CDA PE=1 SV=2 - [CDD_HUMAN]	36	3	1	3	32.88	16.1739	6.91748
Q86VP6	Cullin-associated NEDD8-dissociated protein 1 OS=Homo sapiens GN=CAND1 PE=1 SV=2 - [CAND1_HUMAN]	36	8	1	8	8.21	136.289	5.78271
P68036	Ubiquitin-conjugating enzyme E2 L3 OS=Homo sapiens GN=UBE2L3 PE=1 SV=1 - [UB2L3_HUMAN]	35	3	1	3	35.71	17.8502	8.51416
P27918	Properdin OS=Homo sapiens GN=CFP PE=1 SV=2 - [PROP_HUMAN]	35	5	1	5	10.66	51.242	7.89893
P12268	Inosine-5'-monophosphate dehydrogenase 2 OS=Homo sapiens GN=IMPDH2 PE=1 SV=2 - [IMDH2_HUMAN]	35	3	1	3	8.17	55.7696	6.90283
P49755	Transmembrane emp24 domain-containing protein 10 OS=Homo sapiens GN=TMED10 PE=1 SV=2 - [TMEDA_HUMAN]	35	4	1	4	22.37	24.96	7.44482
P24928	DNA-directed RNA polymerase II subunit RPB1 OS=Homo sapiens GN=POLR2A PE=1 SV=2 - [RPB1_HUMAN]	35	2	1	2	2.13	217.039	7.37158
P13667	Protein disulfide-isomerase A4 OS=Homo sapiens GN=PDIA4 PE=1 SV=2 - [PDIA4_HUMAN]	35	6	1	6	11.32	72.887	5.07178
P50991	T-complex protein 1 subunit delta OS=Homo sapiens GN=CCT4 PE=1 SV=4 - [TCPD_HUMAN]	35	5	1	4	11.13	57.8878	7.82568
Q5M9N0	Coiled-coil domain-containing protein 158 OS=Homo sapiens GN=CCDC158 PE=2 SV=2 - [CD158_HUMAN]	35	5	1	5	5.75	127.062	6.45557
P26599	Polypyrimidine tract-binding protein 1 OS=Homo sapiens GN=PTBP1 PE=1 SV=1 - [PTBP1_HUMAN]	34	9	2	7	18.64	57.1856	9.17334
P03952	Plasma kallikrein OS=Homo sapiens GN=KLKB1 PE=1 SV=1 - [KLKB1_HUMAN]	34	4	1	4	7.52	71.3228	8.22119
P09429	High mobility group protein B1 OS=Homo sapiens GN=HMGB1 PE=1 SV=3 - [HMGB1_HUMAN]	34	4	2	2	21.4	24.8782	5.74463
Q03518	Antigen peptide transporter 1 OS=Homo sapiens GN=TAP1 PE=1 SV=2 - [TAP1_HUMAN]	34	6	1	6	8.91	87.1627	8.01611
P62424	60S ribosomal protein L7a OS=Homo sapiens GN=RPL7A PE=1 SV=2 - [RL7A_HUMAN]	34	6	1	6	27.44	29.977	10.6089
P03950	Angiogenin OS=Homo sapiens GN=ANG PE=1 SV=1 - [ANGI_HUMAN]	34	5	1	5	46.94	16.5394	9.64209
P14550	Alcohol dehydrogenase [NADP(+)] OS=Homo sapiens GN=AKR1A1 PE=1 SV=3 - [AK1A1_HUMAN]	34	6	2	6	21.54	36.5499	6.78564
Q14CN2	Calcium-activated chloride channel regulator 4 OS=Homo sapiens GN=CLCA4 PE=1 SV=2 - [CLCA4_HUMAN]	34	6	1	6	9.36	101.219	5.46533
Q15125	3-beta-hydroxysteroid-Delta(8),Delta(7)-isomerase OS=Homo sapiens GN=EBP PE=1 SV=3 - [EBP_HUMAN]	33	4	1	4	30	26.3358	7.89893
Q8N474	Secreted frizzled-related protein 1 OS=Homo sapiens GN=SFRP1 PE=1 SV=1 - [SFRP1_HUMAN]	33	4	1	4	21.02	35.3621	8.85107
Q96BM9	ADP-ribosylation factor-like protein 8A OS=Homo sapiens GN=ARL8A PE=1 SV=1 - [ARL8A_HUMAN]	33	2	2	2	9.68	21.402	7.76709
P07360	Complement component C8 gamma chain OS=Homo sapiens GN=C8G PE=1 SV=3 - [CO8G_HUMAN]	33	6	1	6	40.59	22.2635	8.30908
Q07960	Rho GTPase-activating protein 1 OS=Homo sapiens GN=ARHGAP1 PE=1 SV=1 - [RHG01_HUMAN]	33	5	1	5	17.31	50.4042	6.29053
P28065	Proteasome subunit beta type-9 OS=Homo sapiens GN=PSMB9 PE=1 SV=2 - [PSB9_HUMAN]	33	4	1	4	21	23.2495	5.03369
P46976	Glycogenin-1 OS=Homo sapiens GN=GYG1 PE=1 SV=4 - [GLYG_HUMAN]	33	4	1	4	10.86	39.3586	5.52881
Q9UBW5	Bridging integrator 2 OS=Homo sapiens GN=BIN2 PE=1 SV=3 - [BIN2_HUMAN]	33	3	1	3	7.08	61.8368	5.14795
P23526	Adenosylhomocysteinase OS=Homo sapiens GN=AHCY PE=1 SV=4 - [SAHH_HUMAN]	33	4	1	4	9.03	47.6852	6.34131
P07225	Vitamin K-dependent protein S OS=Homo sapiens GN=PROS1 PE=1 SV=1 - [PROS_HUMAN]	33	8	1	8	20.86	75.0739	5.66846
Q6UWY2	Serine protease 57 OS=Homo sapiens GN=PRSS57 PE=1 SV=2 - [PRS57_HUMAN]	33	3	1	3	8.48	30.3144	9.31982
P24071	Immunoglobulin alpha Fc receptor OS=Homo sapiens GN=FCAR PE=1 SV=1 - [FCAR_HUMAN]	33	4	1	4	19.86	32.2442	6.91748
P62266	40S ribosomal protein S23 OS=Homo sapiens GN=RPS23 PE=1 SV=3 - [RS23_HUMAN]	32	3	1	3	21.68	15.7977	10.4917
Q6UXB3	Ly6/PLAUR domain-containing protein 2 OS=Homo sapiens GN=LYPD2 PE=2 SV=1 - [LYPD2_HUMAN]	32	2	1	2	11.2	13.1065	5.96045
Q96AT9	Ribulose-phosphate 3-epimerase OS=Homo sapiens GN=RPE PE=1 SV=1 - [RPE_HUMAN]	32	2	2	2	11.4	24.9113	5.57959
Q00765	Receptor expression-enhancing protein 5 OS=Homo sapiens GN=REEP5 PE=1 SV=3 - [REEP5_HUMAN]	32	2	1	2	8.99	21.479	8.104
Q13488	V-type proton ATPase 116 kDa subunit a isoform 3 OS=Homo sapiens GN=TCIRG1 PE=1 SV=3 - [VPP3_HUMAN]	32	6	2	6	8.92	92.9084	7.12256
Q96PP8	Guanylate-binding protein 5 OS=Homo sapiens GN=GBP5 PE=1 SV=1 - [GBP5_HUMAN]	32	8	1	8	22.18	66.575	5.5542
P80748	Immunoglobulin lambda variable 3-21 OS=Homo sapiens GN=IGLV3-21 PE=1 SV=2 - [LV321_HUMAN]	32	2	1	2	23.08	12.438	5.2876
P04066	Tissue alpha-L-fucosidase OS=Homo sapiens GN=FUCA1 PE=1 SV=4 - [FUCO_HUMAN]	31	3	1	3	10.09	53.6547	6.84424
Q7L576	Cytoplasmic FMR1-interacting protein 1 OS=Homo sapiens GN=CYFIP1 PE=1 SV=1 - [CYFP1_HUMAN]	31	7	1	3	5.91	145.089	6.90283
P01612	Ig kappa chain V-I region Mev OS=Homo sapiens PE=1 SV=1 - [KV120_HUMAN]	31	4	1	4	55.96	11.8628	6.56592
Q5JTV8	Torsin-1A-interacting protein 1 OS=Homo sapiens GN=TOR1AIP1 PE=1 SV=2 - [TOIP1_HUMAN]	31	3	1	3	7.2	66.2083	8.17725
Q14254	Flotillin-2 OS=Homo sapiens GN=FLOT2 PE=1 SV=2 - [FLOT2_HUMAN]	31	5	1	5	14.95	47.0347	5.24951
Q14019	Coactosin-like protein OS=Homo sapiens GN=COTL1 PE=1 SV=3 - [COTL1_HUMAN]	31	3	1	3	21.83	15.935	5.66846
Q13043	Serine/threonine-protein kinase 4 OS=Homo sapiens GN=STK4 PE=1 SV=2 - [STK4_HUMAN]	31	4	1	4	10.68	55.5949	5.07178
Q9Y3Z3	Deoxynucleoside triphosphate triphosphohydrolase SAMHD1 OS=Homo sapiens GN=SAMHD1 PE=1 SV=2 - [SAMH1_HUMAN]	31	6	1	6	10.06	72.1548	7.13721
Q14134	Tripartite motif-containing protein 29 OS=Homo sapiens GN=TRIM29 PE=1 SV=2 - [TRI29_HUMAN]	30	11	1	11	19.73	65.7933	7.15186
Q5VTQ0	Tetratricopeptide repeat protein 39B OS=Homo sapiens GN=TTC39B PE=1 SV=4 - [TT39B_HUMAN]	30	2	1	2	2.93	76.9065	7.38623
O15050	TPR and ankyrin repeat-containing protein 1 OS=Homo sapiens GN=TRANK1 PE=2 SV=4 - [TRNK1_HUMAN]	30	3	1	3	0.96	336.007	6.75635
P51659	Peroxisomal multifunctional enzyme type 2 OS=Homo sapiens GN=HSD17B4 PE=1 SV=3 - [DHB4_HUMAN]	30	5	1	5	8.7	79.6363	8.83643
Q13011	Delta(3,5)-Delta(2,4)-dienoyl-CoA isomerase, mitochondrial OS=Homo sapiens GN=ECH1 PE=1 SV=2 - [ECH1_HUMAN]	30	5	1	5	20.73	35.7934	8.00146
P62701	40S ribosomal protein S4, X isoform OS=Homo sapiens GN=RPS4X PE=1 SV=2 - [RS4X_HUMAN]	30	8	1	8	29.28	29.5791	10.1548
P05543	Thyroxine-binding globulin OS=Homo sapiens GN=SERPINA7 PE=1 SV=2 - [THBG_HUMAN]	30	5	1	5	11.33	46.2946	6.30322
P02745	Complement C1q subcomponent subunit A OS=Homo sapiens GN=C1QA PE=1 SV=2 - [C1QA_HUMAN]	30	2	1	2	8.57	26.0002	9.11475
Q96PF1	Protein-glutamine gamma-glutamyltransferase Z OS=Homo sapiens GN=TGM7 PE=2 SV=1 - [TGM7_HUMAN]	30	3	1	3	4.37	79.8906	7.00537
P01266	Thyroglobulin OS=Homo sapiens GN=TG PE=1 SV=5 - [THYG_HUMAN]	30	4	1	4	2.57	304.594	5.57959
P02511	Alpha-crystallin B chain OS=Homo sapiens GN=CRYAB PE=1 SV=2 - [CRYAB_HUMAN]	29	5	1	5	38.29	20.1464	7.32764
P07686	Beta-hexosaminidase subunit beta OS=Homo sapiens GN=HEXB PE=1 SV=3 - [HEXB_HUMAN]	29	7	1	6	14.03	63.0712	6.75635
P27635	60S ribosomal protein L10 OS=Homo sapiens GN=RPL10 PE=1 SV=4 - [RL10_HUMAN]	29	2	2	2	9.35	24.5879	10.0815
P62753	40S ribosomal protein S6 OS=Homo sapiens GN=RPS6 PE=1 SV=1 - [RS6_HUMAN]	29	3	1	3	13.65	28.663	10.8433
P06681	Complement C2 OS=Homo sapiens GN=C2 PE=1 SV=2 - [CO2_HUMAN]	29	6	1	6	8.78	83.2143	7.41553
P24539	ATP synthase F(0) complex subunit B1, mitochondrial OS=Homo sapiens GN=ATP5F1 PE=1 SV=2 - [AT5F1_HUMAN]	29	3	1	3	18.36	28.8903	9.36377
P50452	Serpin B8 OS=Homo sapiens GN=SERPINB8 PE=1 SV=2 - [SPB8_HUMAN]	29	4	1	2	9.63	42.7392	5.56689
A0A0C4DH38	Immunoglobulin heavy variable 5-51 OS=Homo sapiens GN=IGHV5-51 PE=3 SV=1 - [HV551_HUMAN]	29	2	1	2	18.8	12.6663	8.26514
P08582	Melanotransferrin OS=Homo sapiens GN=MELTF PE=1 SV=2 - [TRFM_HUMAN]	28	7	1	7	13.28	80.1633	5.93506
P38606	V-type proton ATPase catalytic subunit A OS=Homo sapiens GN=ATP6V1A PE=1 SV=2 - [VATA_HUMAN]	28	3	1	3	6.48	68.2605	5.51611
Q9NXF1	Testis-expressed sequence 10 protein OS=Homo sapiens GN=TEX10 PE=1 SV=2 - [TEX10_HUMAN]	28	2	1	2	1.61	105.608	9.36377
P05976	Myosin light chain 1/3, skeletal muscle isoform OS=Homo sapiens GN=MYL1 PE=2 SV=3 - [MYL1_HUMAN]	28	4	2	2	22.16	21.1318	5.03369
P05771	Protein kinase C beta type OS=Homo sapiens GN=PRKCB PE=1 SV=4 - [KPCB_HUMAN]	28	4	1	3	7.9	76.8191	7.00537
Q8IWA5	Choline transporter-like protein 2 OS=Homo sapiens GN=SLC44A2 PE=1 SV=3 - [CTL2_HUMAN]	28	6	1	6	8.78	80.0705	8.57275
Q16674	Melanoma-derived growth regulatory protein OS=Homo sapiens GN=MIA PE=1 SV=1 - [MIA_HUMAN]	28	2	1	2	14.5	14.4994	8.79248
Q9UL46	Proteasome activator complex subunit 2 OS=Homo sapiens GN=PSME2 PE=1 SV=4 - [PSME2_HUMAN]	28	5	1	5	30.96	27.3843	5.73193
Q9UKR0	Kallikrein-12 OS=Homo sapiens GN=KLK12 PE=1 SV=1 - [KLK12_HUMAN]	28	3	1	3	17.74	26.7162	7.60596
Q16539	Mitogen-activated protein kinase 14 OS=Homo sapiens GN=MAPK14 PE=1 SV=3 - [MK14_HUMAN]	27	5	9	4	17.22	41.267	5.78271
P39023	60S ribosomal protein L3 OS=Homo sapiens GN=RPL3 PE=1 SV=2 - [RL3_HUMAN]	27	7	2	7	17.12	46.0798	10.1841
Q9HD45	Transmembrane 9 superfamily member 3 OS=Homo sapiens GN=TM9SF3 PE=1 SV=2 - [TM9S3_HUMAN]	27	3	1	3	5.09	67.8431	7.21045
P35606	Coatomer subunit beta' OS=Homo sapiens GN=COPB2 PE=1 SV=2 - [COPB2_HUMAN]	26	4	1	4	4.42	102.422	5.2749
Q9UBR2	Cathepsin Z OS=Homo sapiens GN=CTSZ PE=1 SV=1 - [CATZ_HUMAN]	26	5	1	5	17.16	33.8462	7.10791
O43760	Synaptogyrin-2 OS=Homo sapiens GN=SYNGR2 PE=1 SV=1 - [SNG2_HUMAN]	26	2	2	2	8.04	24.7941	4.94482
P54132	Bloom syndrome protein OS=Homo sapiens GN=BLM PE=1 SV=1 - [BLM_HUMAN]	26	2	1	2	3.53	158.901	7.48877
Q92820	Gamma-glutamyl hydrolase OS=Homo sapiens GN=GGH PE=1 SV=2 - [GGH_HUMAN]	26	8	1	8	30.5	35.9412	7.10791
Q02809	Procollagen-lysine,2-oxoglutarate 5-dioxygenase 1 OS=Homo sapiens GN=PLOD1 PE=1 SV=2 - [PLOD1_HUMAN]	26	2	1	2	3.85	83.4974	6.94678
P41252	Isoleucine--tRNA ligase, cytoplasmic OS=Homo sapiens GN=IARS PE=1 SV=2 - [SYIC_HUMAN]	26	3	1	3	1.98	144.406	6.15088
B5MCY1	Tudor domain-containing protein 15 OS=Homo sapiens GN=TDRD15 PE=2 SV=1 - [TDR15_HUMAN]	26	2	1	2	3.36	221.58	7.03467
P21128	Poly(U)-specific endoribonuclease OS=Homo sapiens GN=ENDOU PE=1 SV=2 - [ENDOU_HUMAN]	25	2	1	2	5.61	46.8419	5.42725
Q9UGU0	Transcription factor 20 OS=Homo sapiens GN=TCF20 PE=1 SV=3 - [TCF20_HUMAN]	25	2	1	2	0.92	211.641	9.0415
Q9NYU2	UDP-glucose:glycoprotein glucosyltransferase 1 OS=Homo sapiens GN=UGGT1 PE=1 SV=3 - [UGGG1_HUMAN]	25	7	2	6	4.44	177.078	5.63037
P21730	C5a anaphylatoxin chemotactic receptor 1 OS=Homo sapiens GN=C5AR1 PE=1 SV=2 - [C5AR1_HUMAN]	25	3	1	3	5.14	39.31	9.01221
P28066	Proteasome subunit alpha type-5 OS=Homo sapiens GN=PSMA5 PE=1 SV=3 - [PSA5_HUMAN]	25	5	1	5	25.31	26.3942	4.79248
O60610	Protein diaphanous homolog 1 OS=Homo sapiens GN=DIAPH1 PE=1 SV=2 - [DIAP1_HUMAN]	25	7	1	7	7.23	141.258	5.41455
P16930	Fumarylacetoacetase OS=Homo sapiens GN=FAH PE=1 SV=2 - [FAAA_HUMAN]	25	5	1	5	15.04	46.3442	6.94678
P78527	DNA-dependent protein kinase catalytic subunit OS=Homo sapiens GN=PRKDC PE=1 SV=3 - [PRKDC_HUMAN]	25	9	1	9	2.52	468.788	7.12256
P01615	Ig kappa chain V-II region FR OS=Homo sapiens PE=1 SV=1 - [KV202_HUMAN]	25	2	1	2	18.58	12.6517	7.94287
Q15746	Myosin light chain kinase, smooth muscle OS=Homo sapiens GN=MYLK PE=1 SV=4 - [MYLK_HUMAN]	24	3	9	2	2.56	210.583	6.15088
P07741	Adenine phosphoribosyltransferase OS=Homo sapiens GN=APRT PE=1 SV=2 - [APT_HUMAN]	24	5	1	5	31.67	19.5954	6.02393
Q12905	Interleukin enhancer-binding factor 2 OS=Homo sapiens GN=ILF2 PE=1 SV=2 - [ILF2_HUMAN]	24	3	1	3	8.97	43.0352	5.26221
Q96F07	Cytoplasmic FMR1-interacting protein 2 OS=Homo sapiens GN=CYFIP2 PE=1 SV=2 - [CYFP2_HUMAN]	24	7	1	3	5.48	148.302	7.31299
Q16651	Prostasin OS=Homo sapiens GN=PRSS8 PE=1 SV=1 - [PRSS8_HUMAN]	24	4	1	4	20.41	36.4083	5.84619
P28070	Proteasome subunit beta type-4 OS=Homo sapiens GN=PSMB4 PE=1 SV=4 - [PSB4_HUMAN]	24	4	1	4	20.83	29.1855	5.97314
P62330	ADP-ribosylation factor 6 OS=Homo sapiens GN=ARF6 PE=1 SV=2 - [ARF6_HUMAN]	24	2	1	2	12.57	20.0694	8.95361
Q15582	Transforming growth factor-beta-induced protein ig-h3 OS=Homo sapiens GN=TGFBI PE=1 SV=1 - [BGH3_HUMAN]	24	4	1	4	11.42	74.634	7.7085
O60493	Sorting nexin-3 OS=Homo sapiens GN=SNX3 PE=1 SV=3 - [SNX3_HUMAN]	24	4	2	4	25.93	18.7508	8.66064
P61313	60S ribosomal protein L15 OS=Homo sapiens GN=RPL15 PE=1 SV=2 - [RL15_HUMAN]	24	5	1	5	23.53	24.1311	11.6196
P12259	Coagulation factor V OS=Homo sapiens GN=F5 PE=1 SV=4 - [FA5_HUMAN]	24	6	1	6	4.41	251.546	6.04932
O43157	Plexin-B1 OS=Homo sapiens GN=PLXNB1 PE=1 SV=3 - [PLXB1_HUMAN]	23	2	1	2	1.03	232.151	5.49072
P19397	Leukocyte surface antigen CD53 OS=Homo sapiens GN=CD53 PE=1 SV=1 - [CD53_HUMAN]	23	2	1	2	7.31	24.3245	7.51807
P16615	Sarcoplasmic/endoplasmic reticulum calcium ATPase 2 OS=Homo sapiens GN=ATP2A2 PE=1 SV=1 - [AT2A2_HUMAN]	23	6	2	5	7.87	114.683	5.33838
P35749	Myosin-11 OS=Homo sapiens GN=MYH11 PE=1 SV=3 - [MYH11_HUMAN]	23	8	1	3	4.21	227.199	5.50342
P22307	Non-specific lipid-transfer protein OS=Homo sapiens GN=SCP2 PE=1 SV=2 - [NLTP_HUMAN]	23	5	1	5	9.51	58.9556	6.88818
P46777	60S ribosomal protein L5 OS=Homo sapiens GN=RPL5 PE=1 SV=3 - [RL5_HUMAN]	23	2	1	2	10.77	34.3407	9.71533
Q7Z404	Transmembrane channel-like protein 4 OS=Homo sapiens GN=TMC4 PE=2 SV=3 - [TMC4_HUMAN]	23	4	1	4	5.62	79.1571	8.93896
P12830	Cadherin-1 OS=Homo sapiens GN=CDH1 PE=1 SV=3 - [CADH1_HUMAN]	22	4	1	4	6.92	97.3959	4.729
Q9UFN0	Protein NipSnap homolog 3A OS=Homo sapiens GN=NIPSNAP3A PE=1 SV=2 - [NPS3A_HUMAN]	22	4	1	4	22.27	28.4485	9.15869
O95571	Persulfide dioxygenase ETHE1, mitochondrial OS=Homo sapiens GN=ETHE1 PE=1 SV=2 - [ETHE1_HUMAN]	22	5	1	5	24.41	27.8551	6.82959
P22695	Cytochrome b-c1 complex subunit 2, mitochondrial OS=Homo sapiens GN=UQCRC2 PE=1 SV=3 - [QCR2_HUMAN]	22	8	1	8	20.97	48.4129	8.63135
Q7RTR0	NACHT, LRR and PYD domains-containing protein 9 OS=Homo sapiens GN=NLRP9 PE=2 SV=1 - [NALP9_HUMAN]	22	2	1	2	2.93	113.238	6.50732
Q13201	Multimerin-1 OS=Homo sapiens GN=MMRN1 PE=1 SV=3 - [MMRN1_HUMAN]	22	2	1	2	2.52	138.023	7.92822
P48960	CD97 antigen OS=Homo sapiens GN=CD97 PE=1 SV=4 - [CD97_HUMAN]	22	5	1	4	7.54	91.8091	6.87354
P10644	cAMP-dependent protein kinase type I-alpha regulatory subunit OS=Homo sapiens GN=PRKAR1A PE=1 SV=1 - [KAP0_HUMAN]	22	4	1	4	12.86	42.955	5.35107
Q9H4A4	Aminopeptidase B OS=Homo sapiens GN=RNPEP PE=1 SV=2 - [AMPB_HUMAN]	22	6	1	6	9.38	72.5495	5.74463
Q9UHL4	Dipeptidyl peptidase 2 OS=Homo sapiens GN=DPP7 PE=1 SV=3 - [DPP2_HUMAN]	22	5	1	5	20.12	54.3072	6.31592
O14795	Protein unc-13 homolog B OS=Homo sapiens GN=UNC13B PE=1 SV=2 - [UN13B_HUMAN]	22	2	1	2	2.77	180.564	5.98584
P10916	Myosin regulatory light chain 2, ventricular/cardiac muscle isoform OS=Homo sapiens GN=MYL2 PE=1 SV=3 - [MLRV_HUMAN]	22	4	2	4	20.48	18.7774	4.99561
P16189	HLA class I histocompatibility antigen, A-31 alpha chain OS=Homo sapiens GN=HLA-A PE=1 SV=2 - [1A31_HUMAN]	21	6	6	2	21.1	40.9782	6.46826
P09758	Tumor-associated calcium signal transducer 2 OS=Homo sapiens GN=TACSTD2 PE=1 SV=3 - [TACD2_HUMAN]	21	4	1	4	16.72	35.6866	8.86572
Q9BVK6	Transmembrane emp24 domain-containing protein 9 OS=Homo sapiens GN=TMED9 PE=1 SV=2 - [TMED9_HUMAN]	21	3	1	3	12.77	27.2602	8.01611
Q969H8	Myeloid-derived growth factor OS=Homo sapiens GN=MYDGF PE=1 SV=1 - [MYDGF_HUMAN]	21	2	1	2	11.56	18.7833	6.68311
P62280	40S ribosomal protein S11 OS=Homo sapiens GN=RPS11 PE=1 SV=3 - [RS11_HUMAN]	21	3	1	3	15.82	18.419	10.3013
Q9NV96	Cell cycle control protein 50A OS=Homo sapiens GN=TMEM30A PE=1 SV=1 - [CC50A_HUMAN]	21	2	2	2	5.54	40.6576	8.5874
P21980	Protein-glutamine gamma-glutamyltransferase 2 OS=Homo sapiens GN=TGM2 PE=1 SV=2 - [TGM2_HUMAN]	21	3	1	3	6.55	77.2797	5.22412
P61803	Dolichyl-diphosphooligosaccharide--protein glycosyltransferase subunit DAD1 OS=Homo sapiens GN=DAD1 PE=1 SV=3 - [DAD1_HUMAN]	21	2	1	2	19.47	12.4886	7.07861
P30084	Enoyl-CoA hydratase, mitochondrial OS=Homo sapiens GN=ECHS1 PE=1 SV=4 - [ECHM_HUMAN]	21	2	1	2	12.07	31.3671	8.07471
P58107	Epiplakin OS=Homo sapiens GN=EPPK1 PE=1 SV=2 - [EPIPL_HUMAN]	21	5	1	4	4.62	555.279	5.60498
P12956	X-ray repair cross-complementing protein 6 OS=Homo sapiens GN=XRCC6 PE=1 SV=2 - [XRCC6_HUMAN]	21	8	1	8	20.53	69.7991	6.63916
Q96KP4	Cytosolic non-specific dipeptidase OS=Homo sapiens GN=CNDP2 PE=1 SV=2 - [CNDP2_HUMAN]	21	3	1	3	10.11	52.8449	5.97314
P61163	Alpha-centractin OS=Homo sapiens GN=ACTR1A PE=1 SV=1 - [ACTZ_HUMAN]	21	3	2	3	9.31	42.5869	6.63916
Q96G03	Phosphoglucomutase-2 OS=Homo sapiens GN=PGM2 PE=1 SV=4 - [PGM2_HUMAN]	21	5	2	5	8.99	68.2404	6.72705
P17174	Aspartate aminotransferase, cytoplasmic OS=Homo sapiens GN=GOT1 PE=1 SV=3 - [AATC_HUMAN]	21	7	1	7	23.49	46.2185	7.00537
Q2VWP7	Protogenin OS=Homo sapiens GN=PRTG PE=2 SV=1 - [PRTG_HUMAN]	21	3	1	2	3.13	126.996	7.59131
P35228	Nitric oxide synthase, inducible OS=Homo sapiens GN=NOS2 PE=1 SV=2 - [NOS2_HUMAN]	21	10	1	10	11.1	131.033	7.95752
P41250	Glycine--tRNA ligase OS=Homo sapiens GN=GARS PE=1 SV=3 - [SYG_HUMAN]	21	4	1	4	7.44	83.1126	7.03467
Q8IWV7	E3 ubiquitin-protein ligase UBR1 OS=Homo sapiens GN=UBR1 PE=1 SV=1 - [UBR1_HUMAN]	20	2	1	2	0.8	200.08	6.01123
O95466	Formin-like protein 1 OS=Homo sapiens GN=FMNL1 PE=1 SV=3 - [FMNL1_HUMAN]	20	5	1	5	5.55	121.777	5.71924
Q00839	Heterogeneous nuclear ribonucleoprotein U OS=Homo sapiens GN=HNRNPU PE=1 SV=6 - [HNRPU_HUMAN]	20	6	1	6	8.97	90.528	5.99854
Q7Z5H4	Vomeronasal type-1 receptor 5 OS=Homo sapiens GN=VN1R5 PE=2 SV=2 - [VN1R5_HUMAN]	20	2	1	2	10.92	40.7516	9.20264
Q9UHG3	Prenylcysteine oxidase 1 OS=Homo sapiens GN=PCYOX1 PE=1 SV=3 - [PCYOX_HUMAN]	20	5	1	5	9.11	56.6037	6.17627
P63241	Eukaryotic translation initiation factor 5A-1 OS=Homo sapiens GN=EIF5A PE=1 SV=2 - [IF5A1_HUMAN]	20	5	3	5	40.91	16.8214	5.23682
P15586	N-acetylglucosamine-6-sulfatase OS=Homo sapiens GN=GNS PE=1 SV=3 - [GNS_HUMAN]	20	5	1	5	9.24	62.042	8.30908
O95479	GDH/6PGL endoplasmic bifunctional protein OS=Homo sapiens GN=H6PD PE=1 SV=2 - [G6PE_HUMAN]	20	4	1	4	5.69	88.8364	7.29834
P43405	Tyrosine-protein kinase SYK OS=Homo sapiens GN=SYK PE=1 SV=1 - [KSYK_HUMAN]	20	4	1	4	8.5	72.0203	8.25049
P24821	Tenascin OS=Homo sapiens GN=TNC PE=1 SV=3 - [TENA_HUMAN]	20	5	1	5	2.64	240.7	4.89404
P62993	Growth factor receptor-bound protein 2 OS=Homo sapiens GN=GRB2 PE=1 SV=1 - [GRB2_HUMAN]	20	4	1	4	18.43	25.1904	6.31592
O95395	Beta-1,3-galactosyl-O-glycosyl-glycoprotein beta-1,6-N-acetylglucosaminyltransferase 3 OS=Homo sapiens GN=GCNT3 PE=2 SV=1 - [GCNT3_HUMAN]	20	4	1	4	13.24	50.8307	8.25049
O60706	ATP-binding cassette sub-family C member 9 OS=Homo sapiens GN=ABCC9 PE=1 SV=2 - [ABCC9_HUMAN]	20	3	2	3	2.71	174.112	7.37158
P17661	Desmin OS=Homo sapiens GN=DES PE=1 SV=3 - [DESM_HUMAN]	20	5	3	4	11.91	53.5032	5.2749
Q9NP98	Myozenin-1 OS=Homo sapiens GN=MYOZ1 PE=1 SV=1 - [MYOZ1_HUMAN]	20	2	1	2	9.03	31.7248	8.88037
O60234	Glia maturation factor gamma OS=Homo sapiens GN=GMFG PE=1 SV=1 - [GMFG_HUMAN]	19	4	2	4	39.44	16.7904	5.26221
Q92876	Kallikrein-6 OS=Homo sapiens GN=KLK6 PE=1 SV=1 - [KLK6_HUMAN]	19	5	1	5	29.1	26.8384	7.44482
P13807	Glycogen [starch] synthase, muscle OS=Homo sapiens GN=GYS1 PE=1 SV=2 - [GYS1_HUMAN]	19	6	1	5	14.11	83.7325	6.17627
P17858	ATP-dependent 6-phosphofructokinase, liver type OS=Homo sapiens GN=PFKL PE=1 SV=6 - [PFKAL_HUMAN]	19	4	1	4	10.51	84.9642	7.50342
O60888	Protein CutA OS=Homo sapiens GN=CUTA PE=1 SV=2 - [CUTA_HUMAN]	19	3	1	3	32.96	19.1041	5.50342
P35580	Myosin-10 OS=Homo sapiens GN=MYH10 PE=1 SV=3 - [MYH10_HUMAN]	19	8	1	3	4.3	228.858	5.5415
O43143	Pre-mRNA-splicing factor ATP-dependent RNA helicase DHX15 OS=Homo sapiens GN=DHX15 PE=1 SV=2 - [DHX15_HUMAN]	19	2	1	2	3.9	90.8752	7.45947
Q8NF91	Nesprin-1 OS=Homo sapiens GN=SYNE1 PE=1 SV=4 - [SYNE1_HUMAN]	19	9	1	8	1.53	1010.46	5.52881
P61088	Ubiquitin-conjugating enzyme E2 N OS=Homo sapiens GN=UBE2N PE=1 SV=1 - [UBE2N_HUMAN]	19	2	2	2	11.84	17.127	6.56592
Q9P0G3	Kallikrein-14 OS=Homo sapiens GN=KLK14 PE=1 SV=2 - [KLK14_HUMAN]	19	3	1	3	15.73	29.1028	9.23193
O95747	Serine/threonine-protein kinase OSR1 OS=Homo sapiens GN=OXSR1 PE=1 SV=1 - [OXSR1_HUMAN]	19	4	1	4	7.78	57.9861	6.43018
P35221	Catenin alpha-1 OS=Homo sapiens GN=CTNNA1 PE=1 SV=1 - [CTNA1_HUMAN]	19	7	2	7	12.36	100.009	6.29053
Q8NCL4	Polypeptide N-acetylgalactosaminyltransferase 6 OS=Homo sapiens GN=GALNT6 PE=2 SV=2 - [GALT6_HUMAN]	19	3	2	3	5.63	71.1131	8.17725
Q6XQN6	Nicotinate phosphoribosyltransferase OS=Homo sapiens GN=NAPRT PE=1 SV=2 - [PNCB_HUMAN]	19	3	1	3	6.69	57.542	5.68115
P00746	Complement factor D OS=Homo sapiens GN=CFD PE=1 SV=5 - [CFAD_HUMAN]	19	4	1	4	24.11	27.0159	7.7085
P08473	Neprilysin OS=Homo sapiens GN=MME PE=1 SV=2 - [NEP_HUMAN]	19	5	1	5	6.8	85.4599	5.73193
P69849	Nodal modulator 3 OS=Homo sapiens GN=NOMO3 PE=3 SV=2 - [NOMO3_HUMAN]	19	2	3	2	1.47	134.049	5.66846
P98160	Basement membrane-specific heparan sulfate proteoglycan core protein OS=Homo sapiens GN=HSPG2 PE=1 SV=4 - [PGBM_HUMAN]	19	10	1	10	2.92	468.532	6.50732
P0DJI9	Serum amyloid A-2 protein OS=Homo sapiens GN=SAA2 PE=1 SV=1 - [SAA2_HUMAN]	19	4	1	2	46.72	13.5186	9.14404
P01781	Ig heavy chain V-III region GAL OS=Homo sapiens PE=1 SV=1 - [HV320_HUMAN]	19	3	1	2	26.72	12.7222	8.48486
P06311	Ig kappa chain V-III region IARC/BL41 OS=Homo sapiens PE=4 SV=1 - [KV311_HUMAN]	19	3	1	3	28.91	14.0611	6.60986
Q5TAH2	Sodium/hydrogen exchanger 11 OS=Homo sapiens GN=SLC9C2 PE=2 SV=1 - [SL9C2_HUMAN]	19	2	1	2	4.27	128.969	6.91748
Q9UPY3	Endoribonuclease Dicer OS=Homo sapiens GN=DICER1 PE=1 SV=3 - [DICER_HUMAN]	18	2	1	2	2.97	218.542	5.68115
P00441	Superoxide dismutase [Cu-Zn] OS=Homo sapiens GN=SOD1 PE=1 SV=2 - [SODC_HUMAN]	18	6	1	6	47.4	15.9259	6.12549
P50453	Serpin B9 OS=Homo sapiens GN=SERPINB9 PE=1 SV=1 - [SPB9_HUMAN]	18	5	1	4	13.83	42.3763	5.85889
P26639	Threonine--tRNA ligase, cytoplasmic OS=Homo sapiens GN=TARS PE=1 SV=3 - [SYTC_HUMAN]	18	5	2	5	8.16	83.3819	6.66846
Q9Y3B3	Transmembrane emp24 domain-containing protein 7 OS=Homo sapiens GN=TMED7 PE=1 SV=2 - [TMED7_HUMAN]	18	3	1	3	13.39	25.1556	6.88818
P06317	Ig lambda chain V-VI region SUT OS=Homo sapiens PE=1 SV=1 - [LV603_HUMAN]	18	3	1	2	27.93	12.2398	5.12256
P49368	T-complex protein 1 subunit gamma OS=Homo sapiens GN=CCT3 PE=1 SV=4 - [TCPG_HUMAN]	18	5	2	5	8.99	60.4953	6.49365
Q9H6S3	Epidermal growth factor receptor kinase substrate 8-like protein 2 OS=Homo sapiens GN=EPS8L2 PE=1 SV=2 - [ES8L2_HUMAN]	18	6	1	6	7.41	80.5701	6.84424
Q14562	ATP-dependent RNA helicase DHX8 OS=Homo sapiens GN=DHX8 PE=1 SV=1 - [DHX8_HUMAN]	18	2	1	2	1.48	139.227	8.32373
O95197	Reticulon-3 OS=Homo sapiens GN=RTN3 PE=1 SV=2 - [RTN3_HUMAN]	18	4	1	3	3.2	112.541	4.95752
O43497	Voltage-dependent T-type calcium channel subunit alpha-1G OS=Homo sapiens GN=CACNA1G PE=1 SV=3 - [CAC1G_HUMAN]	18	2	1	2	0.63	262.304	6.59521
Q00872	Myosin-binding protein C, slow-type OS=Homo sapiens GN=MYBPC1 PE=1 SV=2 - [MYPC1_HUMAN]	18	7	1	7	5.78	128.214	6.03662
P41240	Tyrosine-protein kinase CSK OS=Homo sapiens GN=CSK PE=1 SV=1 - [CSK_HUMAN]	17	2	1	2	5.11	50.6717	7.06396
O60346	PH domain leucine-rich repeat-containing protein phosphatase 1 OS=Homo sapiens GN=PHLPP1 PE=1 SV=3 - [PHLP1_HUMAN]	17	3	1	3	2.5	184.556	6.27783
P61019	Ras-related protein Rab-2A OS=Homo sapiens GN=RAB2A PE=1 SV=1 - [RAB2A_HUMAN]	17	4	2	4	23.11	23.5308	6.53662
P36957	Dihydrolipoyllysine-residue succinyltransferase component of 2-oxoglutarate dehydrogenase complex, mitochondrial OS=Homo sapiens GN=DLST PE=1 SV=4 - [ODO2_HUMAN]	17	3	1	3	9.93	48.7245	8.95361
P51692	Signal transducer and activator of transcription 5B OS=Homo sapiens GN=STAT5B PE=1 SV=2 - [STA5B_HUMAN]	17	7	1	3	9.53	89.8096	6.04932
Q9UQB8	Brain-specific angiogenesis inhibitor 1-associated protein 2 OS=Homo sapiens GN=BAIAP2 PE=1 SV=1 - [BAIP2_HUMAN]	17	8	1	8	14.31	60.8296	8.89502
Q9H3N1	Thioredoxin-related transmembrane protein 1 OS=Homo sapiens GN=TMX1 PE=1 SV=1 - [TMX1_HUMAN]	17	3	1	3	11.79	31.7708	4.98291
O14745	Na(+)/H(+) exchange regulatory cofactor NHE-RF1 OS=Homo sapiens GN=SLC9A3R1 PE=1 SV=4 - [NHRF1_HUMAN]	17	6	1	6	19.55	38.8446	5.77002
Q9H3R2	Mucin-13 OS=Homo sapiens GN=MUC13 PE=1 SV=3 - [MUC13_HUMAN]	17	3	1	3	9.57	54.5693	5.07178
O14983	Sarcoplasmic/endoplasmic reticulum calcium ATPase 1 OS=Homo sapiens GN=ATP2A1 PE=1 SV=1 - [AT2A1_HUMAN]	17	5	1	4	6.69	110.182	5.16064
O75351	Vacuolar protein sorting-associated protein 4B OS=Homo sapiens GN=VPS4B PE=1 SV=2 - [VPS4B_HUMAN]	16	3	2	2	6.76	49.2715	7.2251
Q709C8	Vacuolar protein sorting-associated protein 13C OS=Homo sapiens GN=VPS13C PE=1 SV=1 - [VP13C_HUMAN]	16	7	1	6	2.16	422.124	6.82959
Q12802	A-kinase anchor protein 13 OS=Homo sapiens GN=AKAP13 PE=1 SV=2 - [AKP13_HUMAN]	16	2	2	2	1.71	307.359	5.23682
Q14573	Inositol 1,4,5-trisphosphate receptor type 3 OS=Homo sapiens GN=ITPR3 PE=1 SV=2 - [ITPR3_HUMAN]	16	3	1	3	2.88	303.912	6.48096
Q9NZN9	Aryl-hydrocarbon-interacting protein-like 1 OS=Homo sapiens GN=AIPL1 PE=1 SV=2 - [AIPL1_HUMAN]	16	2	1	2	7.03	43.8752	5.94775
Q9P2E3	NFX1-type zinc finger-containing protein 1 OS=Homo sapiens GN=ZNFX1 PE=2 SV=2 - [ZNFX1_HUMAN]	16	3	1	2	1.25	220.084	7.29834
Q5VT98	PRAME family member 20 OS=Homo sapiens GN=PRAMEF20 PE=3 SV=2 - [PRA20_HUMAN]	16	2	1	2	5.05	54.7473	8.06006
P53396	ATP-citrate synthase OS=Homo sapiens GN=ACLY PE=1 SV=3 - [ACLY_HUMAN]	16	6	1	6	6.9	120.762	7.32764
Q92736	Ryanodine receptor 2 OS=Homo sapiens GN=RYR2 PE=1 SV=3 - [RYR2_HUMAN]	16	2	1	2	0.95	564.206	6.07471
Q00597	Fanconi anemia group C protein OS=Homo sapiens GN=FANCC PE=1 SV=1 - [FANCC_HUMAN]	16	2	1	2	7.17	63.3876	6.15088
O75964	ATP synthase subunit g, mitochondrial OS=Homo sapiens GN=ATP5L PE=1 SV=3 - [ATP5L_HUMAN]	16	3	1	3	26.21	11.4212	9.64209
Q6UXY8	Transmembrane channel-like protein 5 OS=Homo sapiens GN=TMC5 PE=2 SV=3 - [TMC5_HUMAN]	16	5	1	5	5.77	114.724	8.20654
Q15833	Syntaxin-binding protein 2 OS=Homo sapiens GN=STXBP2 PE=1 SV=2 - [STXB2_HUMAN]	16	5	1	5	9.95	66.4105	6.55127
Q9Y624	Junctional adhesion molecule A OS=Homo sapiens GN=F11R PE=1 SV=1 - [JAM1_HUMAN]	16	2	1	2	7.69	32.5625	7.89893
Q15185	Prostaglandin E synthase 3 OS=Homo sapiens GN=PTGES3 PE=1 SV=1 - [TEBP_HUMAN]	16	2	1	2	12.5	18.6854	4.53857
Q8NBS9	Thioredoxin domain-containing protein 5 OS=Homo sapiens GN=TXNDC5 PE=1 SV=2 - [TXND5_HUMAN]	16	3	1	3	9.49	47.5987	5.97314
Q9UM00	Calcium load-activated calcium channel OS=Homo sapiens GN=TMCO1 PE=1 SV=1 - [TMCO1_HUMAN]	16	2	1	2	12.23	21.1612	9.74463
Q15257	Serine/threonine-protein phosphatase 2A activator OS=Homo sapiens GN=PPP2R4 PE=1 SV=3 - [PTPA_HUMAN]	16	2	1	2	4.75	40.6414	5.93506
Q9Y4L1	Hypoxia up-regulated protein 1 OS=Homo sapiens GN=HYOU1 PE=1 SV=1 - [HYOU1_HUMAN]	16	5	1	5	5.81	111.266	5.22412
O75592	E3 ubiquitin-protein ligase MYCBP2 OS=Homo sapiens GN=MYCBP2 PE=1 SV=3 - [MYCB2_HUMAN]	16	2	1	2	0.3	509.759	7.03467
P57735	Ras-related protein Rab-25 OS=Homo sapiens GN=RAB25 PE=1 SV=2 - [RAB25_HUMAN]	16	3	1	3	14.55	23.481	5.96045
Q8N895	Zinc finger protein 366 OS=Homo sapiens GN=ZNF366 PE=1 SV=1 - [ZN366_HUMAN]	16	3	1	3	7.39	85.0521	8.5874
Q6UX73	UPF0764 protein C16orf89 OS=Homo sapiens GN=C16orf89 PE=1 SV=2 - [CP089_HUMAN]	16	2	1	2	5.97	45.362	6.18896
P22748	Carbonic anhydrase 4 OS=Homo sapiens GN=CA4 PE=1 SV=2 - [CAH4_HUMAN]	16	5	1	5	17.95	35.0099	7.82568
P30043	Flavin reductase (NADPH) OS=Homo sapiens GN=BLVRB PE=1 SV=3 - [BLVRB_HUMAN]	16	4	1	4	22.33	22.1054	7.6499
Q02985	Complement factor H-related protein 3 OS=Homo sapiens GN=CFHR3 PE=1 SV=2 - [FHR3_HUMAN]	15	3	1	2	21.21	37.2987	7.54736
Q9Y6C9	Mitochondrial carrier homolog 2 OS=Homo sapiens GN=MTCH2 PE=1 SV=1 - [MTCH2_HUMAN]	15	4	1	4	16.83	33.3089	7.97217
Q8N423	Leukocyte immunoglobulin-like receptor subfamily B member 2 OS=Homo sapiens GN=LILRB2 PE=1 SV=4 - [LIRB2_HUMAN]	15	4	4	3	7.86	64.998	7.2251
O15231	Zinc finger protein 185 OS=Homo sapiens GN=ZNF185 PE=1 SV=3 - [ZN185_HUMAN]	15	6	1	6	9.29	73.4802	7.00537
Q96Q15	Serine/threonine-protein kinase SMG1 OS=Homo sapiens GN=SMG1 PE=1 SV=3 - [SMG1_HUMAN]	15	6	1	6	3.2	410.241	6.45557
P15848	Arylsulfatase B OS=Homo sapiens GN=ARSB PE=1 SV=1 - [ARSB_HUMAN]	15	2	1	2	3.38	59.6494	8.20654
Q9H0W9	Ester hydrolase C11orf54 OS=Homo sapiens GN=C11orf54 PE=1 SV=1 - [CK054_HUMAN]	15	2	1	2	7.3	35.0946	6.69775
P23368	NAD-dependent malic enzyme, mitochondrial OS=Homo sapiens GN=ME2 PE=1 SV=1 - [MAOM_HUMAN]	15	7	1	7	20.38	65.4018	7.60596
P54802	Alpha-N-acetylglucosaminidase OS=Homo sapiens GN=NAGLU PE=1 SV=2 - [ANAG_HUMAN]	15	4	1	4	8.75	82.2136	6.65381
Q8NE86	Calcium uniporter protein, mitochondrial OS=Homo sapiens GN=MCU PE=1 SV=1 - [MCU_HUMAN]	15	3	1	3	11.68	39.8418	8.646
Q14847	LIM and SH3 domain protein 1 OS=Homo sapiens GN=LASP1 PE=1 SV=2 - [LASP1_HUMAN]	15	3	1	3	13.03	29.6982	7.04932
P29728	2'-5'-oligoadenylate synthase 2 OS=Homo sapiens GN=OAS2 PE=1 SV=3 - [OAS2_HUMAN]	15	6	1	6	12.24	82.3785	8.25049
Q9ULV4	Coronin-1C OS=Homo sapiens GN=CORO1C PE=1 SV=1 - [COR1C_HUMAN]	15	5	1	5	14.98	53.2151	7.07861
P05154	Plasma serine protease inhibitor OS=Homo sapiens GN=SERPINA5 PE=1 SV=3 - [IPSP_HUMAN]	15	4	1	4	11.58	45.6457	9.26123
P0CJ92	Golgin subfamily A member 8H OS=Homo sapiens GN=GOLGA8H PE=3 SV=1 - [GOG8H_HUMAN]	15	4	3	3	7.75	71.2983	8.00146
P0DOX3	Immunoglobulin delta heavy chain OS=Homo sapiens PE=1 SV=1 - [IGD_HUMAN]	15	6	1	2	15.04	56.1891	8.01611
Q13217	DnaJ homolog subfamily C member 3 OS=Homo sapiens GN=DNAJC3 PE=1 SV=1 - [DNJC3_HUMAN]	14	3	1	3	9.52	57.5442	6.15088
Q15435	Protein phosphatase 1 regulatory subunit 7 OS=Homo sapiens GN=PPP1R7 PE=1 SV=1 - [PP1R7_HUMAN]	14	2	1	2	8.06	41.5385	4.90674
P59826	BPI fold-containing family B member 3 OS=Homo sapiens GN=BPIFB3 PE=2 SV=2 - [BPIB3_HUMAN]	14	5	1	5	14.5	50.3107	6.7417
Q8WXH0	Nesprin-2 OS=Homo sapiens GN=SYNE2 PE=1 SV=3 - [SYNE2_HUMAN]	14	6	1	6	1.26	795.944	5.36377
P20827	Ephrin-A1 OS=Homo sapiens GN=EFNA1 PE=1 SV=2 - [EFNA1_HUMAN]	14	2	1	2	8.29	23.7719	6.82959
Q86Y34	Adhesion G protein-coupled receptor G3 OS=Homo sapiens GN=ADGRG3 PE=1 SV=1 - [AGRG3_HUMAN]	14	4	1	4	8.74	60.8215	8.71924
Q8N697	Solute carrier family 15 member 4 OS=Homo sapiens GN=SLC15A4 PE=1 SV=1 - [S15A4_HUMAN]	14	3	1	3	5.2	61.9934	8.99756
P43251	Biotinidase OS=Homo sapiens GN=BTD PE=1 SV=2 - [BTD_HUMAN]	14	3	1	3	9.94	61.0933	6.25244
P13804	Electron transfer flavoprotein subunit alpha, mitochondrial OS=Homo sapiens GN=ETFA PE=1 SV=1 - [ETFA_HUMAN]	14	6	1	6	25.53	35.0576	8.38232
P13010	X-ray repair cross-complementing protein 5 OS=Homo sapiens GN=XRCC5 PE=1 SV=3 - [XRCC5_HUMAN]	14	7	1	7	9.56	82.6523	5.80811
P30626	Sorcin OS=Homo sapiens GN=SRI PE=1 SV=1 - [SORCN_HUMAN]	14	2	1	2	9.6	21.6624	5.59229
P62906	60S ribosomal protein L10a OS=Homo sapiens GN=RPL10A PE=1 SV=2 - [RL10A_HUMAN]	14	4	1	4	19.82	24.8155	9.93506
Q14103	Heterogeneous nuclear ribonucleoprotein D0 OS=Homo sapiens GN=HNRNPD PE=1 SV=1 - [HNRPD_HUMAN]	14	4	2	3	11.55	38.4103	7.81104
P31941	DNA dC->dU-editing enzyme APOBEC-3A OS=Homo sapiens GN=APOBEC3A PE=1 SV=3 - [ABC3A_HUMAN]	14	2	2	2	13.07	22.9972	6.84424
A8K7I4	Calcium-activated chloride channel regulator 1 OS=Homo sapiens GN=CLCA1 PE=1 SV=3 - [CLCA1_HUMAN]	14	9	1	9	12.14	100.163	6.3667
P78386	Keratin, type II cuticular Hb5 OS=Homo sapiens GN=KRT85 PE=1 SV=1 - [KRT85_HUMAN]	14	7	5	6	11.44	55.7665	6.55127
P46013	Proliferation marker protein Ki-67 OS=Homo sapiens GN=MKI67 PE=1 SV=2 - [KI67_HUMAN]	13	4	1	4	1.47	358.474	9.45166
Q9NRJ3	C-C motif chemokine 28 OS=Homo sapiens GN=CCL28 PE=1 SV=1 - [CCL28_HUMAN]	13	3	1	3	21.26	14.2704	10.1987
P54920	Alpha-soluble NSF attachment protein OS=Homo sapiens GN=NAPA PE=1 SV=3 - [SNAA_HUMAN]	13	3	1	3	13.9	33.2113	5.36377
P50990	T-complex protein 1 subunit theta OS=Homo sapiens GN=CCT8 PE=1 SV=4 - [TCPQ_HUMAN]	13	4	1	4	8.58	59.5825	5.60498
Q8WTT2	Nucleolar complex protein 3 homolog OS=Homo sapiens GN=NOC3L PE=1 SV=1 - [NOC3L_HUMAN]	13	2	1	2	6.13	92.4896	9.17334
Q02413	Desmoglein-1 OS=Homo sapiens GN=DSG1 PE=1 SV=2 - [DSG1_HUMAN]	13	4	1	4	6.2	113.676	5.03369
P54840	Glycogen [starch] synthase, liver OS=Homo sapiens GN=GYS2 PE=1 SV=2 - [GYS2_HUMAN]	13	3	1	2	6.4	80.9377	6.82959
Q16270	Insulin-like growth factor-binding protein 7 OS=Homo sapiens GN=IGFBP7 PE=1 SV=1 - [IBP7_HUMAN]	13	4	1	3	20.57	29.1114	7.89893
P00367	Glutamate dehydrogenase 1, mitochondrial OS=Homo sapiens GN=GLUD1 PE=1 SV=2 - [DHE3_HUMAN]	13	5	2	5	8.96	61.3592	7.79639
Q86UP2	Kinectin OS=Homo sapiens GN=KTN1 PE=1 SV=1 - [KTN1_HUMAN]	13	2	1	2	1.69	156.179	5.64307
P21281	V-type proton ATPase subunit B, brain isoform OS=Homo sapiens GN=ATP6V1B2 PE=1 SV=3 - [VATB2_HUMAN]	13	3	2	3	8.81	56.4649	5.80811
P05023	Sodium/potassium-transporting ATPase subunit alpha-1 OS=Homo sapiens GN=ATP1A1 PE=1 SV=1 - [AT1A1_HUMAN]	13	5	2	4	4.79	112.824	5.49072
P62854	40S ribosomal protein S26 OS=Homo sapiens GN=RPS26 PE=1 SV=3 - [RS26_HUMAN]	13	4	2	4	43.48	13.0071	11.0044
Q15149	Plectin OS=Homo sapiens GN=PLEC PE=1 SV=3 - [PLEC_HUMAN]	13	8	1	7	1.69	531.466	5.96045
Q01459	Di-N-acetylchitobiase OS=Homo sapiens GN=CTBS PE=1 SV=1 - [DIAC_HUMAN]	13	3	1	3	9.61	43.7316	6.63916
Q56UQ5	TPT1-like protein OS=Homo sapiens PE=2 SV=2 - [TPT1L_HUMAN]	13	2	2	2	14.29	15.7468	6.18896
Q06033	Inter-alpha-trypsin inhibitor heavy chain H3 OS=Homo sapiens GN=ITIH3 PE=1 SV=2 - [ITIH3_HUMAN]	13	3	1	3	4.61	99.7865	5.74463
Q7L5N7	Lysophosphatidylcholine acyltransferase 2 OS=Homo sapiens GN=LPCAT2 PE=1 SV=1 - [PCAT2_HUMAN]	13	4	1	4	9.93	60.1694	6.55127
Q8N441	Fibroblast growth factor receptor-like 1 OS=Homo sapiens GN=FGFRL1 PE=1 SV=1 - [FGRL1_HUMAN]	13	2	1	2	3.97	54.5024	9.74463
Q92619	Minor histocompatibility protein HA-1 OS=Homo sapiens GN=HMHA1 PE=1 SV=2 - [HMHA1_HUMAN]	13	3	1	3	2.29	124.536	6.1001
P42785	Lysosomal Pro-X carboxypeptidase OS=Homo sapiens GN=PRCP PE=1 SV=1 - [PCP_HUMAN]	13	4	1	4	10.48	55.7639	7.21045
Q02224	Centromere-associated protein E OS=Homo sapiens GN=CENPE PE=1 SV=2 - [CENPE_HUMAN]	13	5	1	5	2.55	316.219	5.64307
P14927	Cytochrome b-c1 complex subunit 7 OS=Homo sapiens GN=UQCRB PE=1 SV=2 - [QCR7_HUMAN]	13	2	1	2	20.72	13.522	8.77783
Q12841	Follistatin-related protein 1 OS=Homo sapiens GN=FSTL1 PE=1 SV=1 - [FSTL1_HUMAN]	13	2	1	2	6.17	34.9629	5.51611
Q92597	Protein NDRG1 OS=Homo sapiens GN=NDRG1 PE=1 SV=1 - [NDRG1_HUMAN]	13	3	1	3	12.69	42.8077	5.8208
Q96DR8	Mucin-like protein 1 OS=Homo sapiens GN=MUCL1 PE=1 SV=1 - [MUCL1_HUMAN]	13	4	1	4	22.22	9.03363	4.64014
P20929	Nebulin OS=Homo sapiens GN=NEB PE=1 SV=5 - [NEBU_HUMAN]	13	6	1	6	1.14	772.428	9.0708
A2RRP1	Neuroblastoma-amplified sequence OS=Homo sapiens GN=NBAS PE=1 SV=2 - [NBAS_HUMAN]	13	3	1	3	2.78	268.401	5.96045
P08237	ATP-dependent 6-phosphofructokinase, muscle type OS=Homo sapiens GN=PFKM PE=1 SV=2 - [PFKAM_HUMAN]	13	3	1	3	3.46	85.1284	7.98682
P06276	Cholinesterase OS=Homo sapiens GN=BCHE PE=1 SV=1 - [CHLE_HUMAN]	12	3	2	3	4.82	68.3743	7.41553
P40227	T-complex protein 1 subunit zeta OS=Homo sapiens GN=CCT6A PE=1 SV=3 - [TCPZ_HUMAN]	12	2	1	2	3.58	57.9876	6.68311
Q9H6W3	Bifunctional lysine-specific demethylase and histidyl-hydroxylase NO66 OS=Homo sapiens GN=NO66 PE=1 SV=2 - [NO66_HUMAN]	12	2	1	2	7.18	71.0414	6.45557
P31939	Bifunctional purine biosynthesis protein PURH OS=Homo sapiens GN=ATIC PE=1 SV=3 - [PUR9_HUMAN]	12	4	1	4	7.6	64.5753	6.7124
Q63HN8	E3 ubiquitin-protein ligase RNF213 OS=Homo sapiens GN=RNF213 PE=1 SV=3 - [RN213_HUMAN]	12	5	1	5	1.54	591.03	6.48096
Q13045	Protein flightless-1 homolog OS=Homo sapiens GN=FLII PE=1 SV=2 - [FLII_HUMAN]	12	4	1	4	4.65	144.66	6.04932
Q8NBQ5	Estradiol 17-beta-dehydrogenase 11 OS=Homo sapiens GN=HSD17B11 PE=1 SV=3 - [DHB11_HUMAN]	12	2	1	2	10.33	32.9147	9.0708
O75352	Mannose-P-dolichol utilization defect 1 protein OS=Homo sapiens GN=MPDU1 PE=1 SV=2 - [MPU1_HUMAN]	12	2	1	2	9.72	26.6205	8.93896
P13798	Acylamino-acid-releasing enzyme OS=Homo sapiens GN=APEH PE=1 SV=4 - [ACPH_HUMAN]	12	5	1	5	6.69	81.1726	5.47803
O00204	Sulfotransferase family cytosolic 2B member 1 OS=Homo sapiens GN=SULT2B1 PE=1 SV=2 - [ST2B1_HUMAN]	12	5	1	5	16.99	41.2815	5.40186
Q02543	60S ribosomal protein L18a OS=Homo sapiens GN=RPL18A PE=1 SV=2 - [RL18A_HUMAN]	12	4	1	4	21.59	20.7489	10.7114
Q9NQC3	Reticulon-4 OS=Homo sapiens GN=RTN4 PE=1 SV=2 - [RTN4_HUMAN]	12	3	1	3	3.36	129.851	4.50049
P17655	Calpain-2 catalytic subunit OS=Homo sapiens GN=CAPN2 PE=1 SV=6 - [CAN2_HUMAN]	12	5	1	5	10.14	79.9448	4.98291
P53618	Coatomer subunit beta OS=Homo sapiens GN=COPB1 PE=1 SV=3 - [COPB_HUMAN]	12	2	1	2	2.52	107.074	6.04932
P09871	Complement C1s subcomponent OS=Homo sapiens GN=C1S PE=1 SV=1 - [C1S_HUMAN]	12	4	1	4	7.85	76.6348	4.95752
P12955	Xaa-Pro dipeptidase OS=Homo sapiens GN=PEPD PE=1 SV=3 - [PEPD_HUMAN]	12	2	1	2	7.71	54.5129	5.99854
P20591	Interferon-induced GTP-binding protein Mx1 OS=Homo sapiens GN=MX1 PE=1 SV=4 - [MX1_HUMAN]	12	7	1	7	14.05	75.4732	5.8335
Q08211	ATP-dependent RNA helicase A OS=Homo sapiens GN=DHX9 PE=1 SV=4 - [DHX9_HUMAN]	12	7	1	7	6.77	140.869	6.84424
P27169	Serum paraoxonase/arylesterase 1 OS=Homo sapiens GN=PON1 PE=1 SV=3 - [PON1_HUMAN]	12	4	2	4	12.39	39.7062	5.22412
Q9NY33	Dipeptidyl peptidase 3 OS=Homo sapiens GN=DPP3 PE=1 SV=2 - [DPP3_HUMAN]	12	5	1	5	7.46	82.5378	5.09717
P26373	60S ribosomal protein L13 OS=Homo sapiens GN=RPL13 PE=1 SV=4 - [RL13_HUMAN]	12	4	1	4	20.38	24.2465	11.6489
Q0VAM2	Ras-GEF domain-containing family member 1B OS=Homo sapiens GN=RASGEF1B PE=1 SV=2 - [RGF1B_HUMAN]	12	3	1	3	5.92	55.3239	7.98682
Q6ZMY3	SPOC domain-containing protein 1 OS=Homo sapiens GN=SPOCD1 PE=2 SV=1 - [SPOC1_HUMAN]	12	3	1	3	2.38	129.945	7.1665
O94986	Centrosomal protein of 152 kDa OS=Homo sapiens GN=CEP152 PE=1 SV=4 - [CE152_HUMAN]	12	2	1	2	1.17	195.504	5.60498
Q9P2D7	Dynein heavy chain 1, axonemal OS=Homo sapiens GN=DNAH1 PE=2 SV=4 - [DYH1_HUMAN]	12	10	1	9	5.2	493.637	5.93506
P78563	Double-stranded RNA-specific editase 1 OS=Homo sapiens GN=ADARB1 PE=1 SV=1 - [RED1_HUMAN]	12	2	1	2	3.91	80.7133	9.01221
O75563	Src kinase-associated phosphoprotein 2 OS=Homo sapiens GN=SKAP2 PE=1 SV=1 - [SKAP2_HUMAN]	12	5	1	5	15.04	41.191	4.69092
Q8NDH2	Coiled-coil domain-containing protein 168 OS=Homo sapiens GN=CCDC168 PE=2 SV=2 - [CC168_HUMAN]	11	4	1	2	1.79	277.778	9.30518
Q86YZ3	Hornerin OS=Homo sapiens GN=HRNR PE=1 SV=2 - [HORN_HUMAN]	11	3	1	3	5.33	282.228	10.0376
Q8IWV8	E3 ubiquitin-protein ligase UBR2 OS=Homo sapiens GN=UBR2 PE=1 SV=1 - [UBR2_HUMAN]	11	3	1	3	1.99	200.408	6.23975
Q9Y618	Nuclear receptor corepressor 2 OS=Homo sapiens GN=NCOR2 PE=1 SV=2 - [NCOR2_HUMAN]	11	2	1	2	1.66	274.635	7.59131
P62847	40S ribosomal protein S24 OS=Homo sapiens GN=RPS24 PE=1 SV=1 - [RS24_HUMAN]	11	2	1	2	16.54	15.4134	10.7847
Q13724	Mannosyl-oligosaccharide glucosidase OS=Homo sapiens GN=MOGS PE=1 SV=5 - [MOGS_HUMAN]	11	3	1	3	4.66	91.8606	8.89502
Q03001	Dystonin OS=Homo sapiens GN=DST PE=1 SV=4 - [DYST_HUMAN]	11	7	1	7	1.52	860.127	5.24951
O60938	Keratocan OS=Homo sapiens GN=KERA PE=1 SV=1 - [KERA_HUMAN]	11	3	1	3	4.55	40.4829	7.47412
P46977	Dolichyl-diphosphooligosaccharide--protein glycosyltransferase subunit STT3A OS=Homo sapiens GN=STT3A PE=1 SV=2 - [STT3A_HUMAN]	11	7	2	7	15.6	80.4768	8.07471
Q02978	Mitochondrial 2-oxoglutarate/malate carrier protein OS=Homo sapiens GN=SLC25A11 PE=1 SV=3 - [M2OM_HUMAN]	11	4	1	4	16.88	34.0399	9.90576
P16083	Ribosyldihydronicotinamide dehydrogenase [quinone] OS=Homo sapiens GN=NQO2 PE=1 SV=5 - [NQO2_HUMAN]	11	2	1	2	17.32	25.902	6.29053
P50914	60S ribosomal protein L14 OS=Homo sapiens GN=RPL14 PE=1 SV=4 - [RL14_HUMAN]	11	3	1	3	13.49	23.417	10.9312
Q16762	Thiosulfate sulfurtransferase OS=Homo sapiens GN=TST PE=1 SV=4 - [THTR_HUMAN]	11	2	1	2	7.41	33.4078	7.25439
Q99798	Aconitate hydratase, mitochondrial OS=Homo sapiens GN=ACO2 PE=1 SV=2 - [ACON_HUMAN]	11	5	1	5	9.49	85.3719	7.60596
P27449	V-type proton ATPase 16 kDa proteolipid subunit OS=Homo sapiens GN=ATP6V0C PE=1 SV=1 - [VATL_HUMAN]	11	2	1	2	31.61	15.7255	8.44092
Q9HC38	Glyoxalase domain-containing protein 4 OS=Homo sapiens GN=GLOD4 PE=1 SV=1 - [GLOD4_HUMAN]	11	2	1	2	7.99	34.7713	5.60498
P08567	Pleckstrin OS=Homo sapiens GN=PLEK PE=1 SV=3 - [PLEK_HUMAN]	11	3	1	3	14.86	40.0994	8.27979
Q9H0E2	Toll-interacting protein OS=Homo sapiens GN=TOLLIP PE=1 SV=1 - [TOLIP_HUMAN]	11	2	1	2	9.85	30.2622	5.97314
P02649	Apolipoprotein E OS=Homo sapiens GN=APOE PE=1 SV=1 - [APOE_HUMAN]	11	4	1	4	16.72	36.1318	5.73193
P09622	Dihydrolipoyl dehydrogenase, mitochondrial OS=Homo sapiens GN=DLD PE=1 SV=2 - [DLDH_HUMAN]	11	4	1	4	7.07	54.143	7.85498
P46459	Vesicle-fusing ATPase OS=Homo sapiens GN=NSF PE=1 SV=3 - [NSF_HUMAN]	11	3	1	3	4.3	82.5421	6.94678
Q15631	Translin OS=Homo sapiens GN=TSN PE=1 SV=1 - [TSN_HUMAN]	11	4	1	4	23.25	26.1668	6.44287
P08294	Extracellular superoxide dismutase [Cu-Zn] OS=Homo sapiens GN=SOD3 PE=1 SV=2 - [SODE_HUMAN]	11	2	1	2	10	25.8347	6.60986
Q01105	Protein SET OS=Homo sapiens GN=SET PE=1 SV=3 - [SET_HUMAN]	11	3	2	3	12.07	33.4687	4.32275
O15020	Spectrin beta chain, non-erythrocytic 2 OS=Homo sapiens GN=SPTBN2 PE=1 SV=3 - [SPTN2_HUMAN]	11	6	1	4	3.85	271.157	6.11279
Q08209	Serine/threonine-protein phosphatase 2B catalytic subunit alpha isoform OS=Homo sapiens GN=PPP3CA PE=1 SV=1 - [PP2BA_HUMAN]	11	2	3	2	9.02	58.6503	5.85889
Q5K651	Sterile alpha motif domain-containing protein 9 OS=Homo sapiens GN=SAMD9 PE=1 SV=1 - [SAMD9_HUMAN]	11	4	1	4	4.03	184.165	7.82568
Q15751	Probable E3 ubiquitin-protein ligase HERC1 OS=Homo sapiens GN=HERC1 PE=1 SV=2 - [HERC1_HUMAN]	11	4	1	4	1.58	531.891	6.03662
P53597	Succinate--CoA ligase [ADP/GDP-forming] subunit alpha, mitochondrial OS=Homo sapiens GN=SUCLG1 PE=1 SV=4 - [SUCA_HUMAN]	11	2	1	2	7.23	36.2268	8.79248
P46939	Utrophin OS=Homo sapiens GN=UTRN PE=1 SV=2 - [UTRO_HUMAN]	11	5	1	5	1.89	394.22	5.32568
P58499	Protein FAM3B OS=Homo sapiens GN=FAM3B PE=1 SV=2 - [FAM3B_HUMAN]	10	4	1	4	17.45	25.9652	8.74854
O00757	Fructose-1,6-bisphosphatase isozyme 2 OS=Homo sapiens GN=FBP2 PE=1 SV=2 - [F16P2_HUMAN]	10	3	1	2	10.03	36.7199	7.2251
P04440	HLA class II histocompatibility antigen, DP beta 1 chain OS=Homo sapiens GN=HLA-DPB1 PE=1 SV=1 - [DPB1_HUMAN]	10	3	1	2	14.34	29.1408	8.57275
Q9H7P6	Multivesicular body subunit 12B OS=Homo sapiens GN=MVB12B PE=1 SV=2 - [MB12B_HUMAN]	10	3	1	3	14.73	35.5968	8.14795
Q8TD16	Protein bicaudal D homolog 2 OS=Homo sapiens GN=BICD2 PE=1 SV=1 - [BICD2_HUMAN]	10	2	1	2	2.55	93.476	5.43994
P57737	Coronin-7 OS=Homo sapiens GN=CORO7 PE=1 SV=2 - [CORO7_HUMAN]	10	4	1	4	5.73	100.542	5.79541
Q92888	Rho guanine nucleotide exchange factor 1 OS=Homo sapiens GN=ARHGEF1 PE=1 SV=2 - [ARHG1_HUMAN]	10	4	1	4	6.69	102.371	5.65576
P29373	Cellular retinoic acid-binding protein 2 OS=Homo sapiens GN=CRABP2 PE=1 SV=2 - [RABP2_HUMAN]	10	2	1	2	13.04	15.683	5.40186
Q14152	Eukaryotic translation initiation factor 3 subunit A OS=Homo sapiens GN=EIF3A PE=1 SV=1 - [EIF3A_HUMAN]	10	4	1	4	3.18	166.468	6.78564
P14868	Aspartate--tRNA ligase, cytoplasmic OS=Homo sapiens GN=DARS PE=1 SV=2 - [SYDC_HUMAN]	10	3	1	3	4.59	57.1	6.55127
Q15413	Ryanodine receptor 3 OS=Homo sapiens GN=RYR3 PE=1 SV=3 - [RYR3_HUMAN]	10	6	1	6	2.71	551.688	5.68115
P54278	Mismatch repair endonuclease PMS2 OS=Homo sapiens GN=PMS2 PE=1 SV=2 - [PMS2_HUMAN]	10	2	1	2	3.83	95.7361	6.85889
Q99574	Neuroserpin OS=Homo sapiens GN=SERPINI1 PE=1 SV=1 - [NEUS_HUMAN]	10	4	1	4	10.73	46.3971	4.90674
P43307	Translocon-associated protein subunit alpha OS=Homo sapiens GN=SSR1 PE=1 SV=3 - [SSRA_HUMAN]	10	3	1	3	11.89	32.2153	4.48779
Q07065	Cytoskeleton-associated protein 4 OS=Homo sapiens GN=CKAP4 PE=1 SV=2 - [CKAP4_HUMAN]	10	3	2	3	5.32	65.9827	5.92236
Q13423	NAD(P) transhydrogenase, mitochondrial OS=Homo sapiens GN=NNT PE=1 SV=3 - [NNTM_HUMAN]	10	4	1	4	4.6	113.823	8.08936
Q5SSJ5	Heterochromatin protein 1-binding protein 3 OS=Homo sapiens GN=HP1BP3 PE=1 SV=1 - [HP1B3_HUMAN]	10	2	1	2	3.25	61.1693	9.67139
Q9NSC7	Alpha-N-acetylgalactosaminide alpha-2,6-sialyltransferase 1 OS=Homo sapiens GN=ST6GALNAC1 PE=2 SV=1 - [SIA7A_HUMAN]	10	2	1	2	5	68.5215	9.92041
A6NHR9	Structural maintenance of chromosomes flexible hinge domain-containing protein 1 OS=Homo sapiens GN=SMCHD1 PE=1 SV=2 - [SMHD1_HUMAN]	10	3	1	3	2.39	226.231	7.29834
O00303	Eukaryotic translation initiation factor 3 subunit F OS=Homo sapiens GN=EIF3F PE=1 SV=1 - [EIF3F_HUMAN]	10	2	1	2	8.4	37.5402	5.45264
Q8TE68	Epidermal growth factor receptor kinase substrate 8-like protein 1 OS=Homo sapiens GN=EPS8L1 PE=1 SV=3 - [ES8L1_HUMAN]	10	4	2	4	4.84	80.202	6.03662
Q01970	1-phosphatidylinositol 4,5-bisphosphate phosphodiesterase beta-3 OS=Homo sapiens GN=PLCB3 PE=1 SV=2 - [PLCB3_HUMAN]	10	4	1	4	4.54	138.713	5.89697
Q9NPP4	NLR family CARD domain-containing protein 4 OS=Homo sapiens GN=NLRC4 PE=1 SV=2 - [NLRC4_HUMAN]	10	5	1	5	5.66	116.085	6.771
Q9BRX8	Redox-regulatory protein FAM213A OS=Homo sapiens GN=FAM213A PE=1 SV=3 - [F213A_HUMAN]	10	3	1	3	16.59	25.7474	8.83643
Q8IZD4	mRNA-decapping enzyme 1B OS=Homo sapiens GN=DCP1B PE=1 SV=2 - [DCP1B_HUMAN]	10	2	1	2	5.35	67.6808	8.55811
Q5VUA4	Zinc finger protein 318 OS=Homo sapiens GN=ZNF318 PE=1 SV=2 - [ZN318_HUMAN]	10	3	1	3	2.63	250.958	7.1958
P16157	Ankyrin-1 OS=Homo sapiens GN=ANK1 PE=1 SV=3 - [ANK1_HUMAN]	10	5	1	5	3.99	206.137	6.01123
Q6UB98	Ankyrin repeat domain-containing protein 12 OS=Homo sapiens GN=ANKRD12 PE=1 SV=3 - [ANR12_HUMAN]	10	2	1	2	2.28	235.507	7.00537
Q8NC51	Plasminogen activator inhibitor 1 RNA-binding protein OS=Homo sapiens GN=SERBP1 PE=1 SV=2 - [PAIRB_HUMAN]	10	2	1	2	7.84	44.9385	8.646
P98161	Polycystin-1 OS=Homo sapiens GN=PKD1 PE=1 SV=3 - [PKD1_HUMAN]	10	2	1	2	1.14	462.239	6.72705
O00462	Beta-mannosidase OS=Homo sapiens GN=MANBA PE=2 SV=3 - [MANBA_HUMAN]	9	2	1	2	2.16	100.831	5.51611
Q9Y2A7	Nck-associated protein 1 OS=Homo sapiens GN=NCKAP1 PE=1 SV=1 - [NCKP1_HUMAN]	9	2	1	2	1.42	128.707	6.62451
Q9P281	BAH and coiled-coil domain-containing protein 1 OS=Homo sapiens GN=BAHCC1 PE=1 SV=3 - [BAHC1_HUMAN]	9	2	1	2	1.57	276.76	8.80713
P62314	Small nuclear ribonucleoprotein Sm D1 OS=Homo sapiens GN=SNRPD1 PE=1 SV=1 - [SMD1_HUMAN]	9	2	1	2	27.73	13.2734	11.561
P21462	fMet-Leu-Phe receptor OS=Homo sapiens GN=FPR1 PE=1 SV=3 - [FPR1_HUMAN]	9	2	1	2	8.29	38.4204	9.02686
Q99832	T-complex protein 1 subunit eta OS=Homo sapiens GN=CCT7 PE=1 SV=2 - [TCPH_HUMAN]	9	3	1	3	7	59.3289	7.6499
Q9NZM1	Myoferlin OS=Homo sapiens GN=MYOF PE=1 SV=1 - [MYOF_HUMAN]	9	4	1	3	2.13	234.561	6.17627
Q9H069	Dynein regulatory complex subunit 3 OS=Homo sapiens GN=DRC3 PE=2 SV=2 - [DRC3_HUMAN]	9	2	1	2	7.07	61.0157	4.77979
P53992	Protein transport protein Sec24C OS=Homo sapiens GN=SEC24C PE=1 SV=3 - [SC24C_HUMAN]	9	5	1	5	7.13	118.249	7.06396
Q9UKA9	Polypyrimidine tract-binding protein 2 OS=Homo sapiens GN=PTBP2 PE=1 SV=1 - [PTBP2_HUMAN]	9	4	1	2	11.3	57.4548	8.66064
P53621	Coatomer subunit alpha OS=Homo sapiens GN=COPA PE=1 SV=2 - [COPA_HUMAN]	9	7	1	7	5.47	138.258	7.66455
O95867	Lymphocyte antigen 6 complex locus protein G6c OS=Homo sapiens GN=LY6G6C PE=1 SV=1 - [LY66C_HUMAN]	9	2	1	2	20	13.8118	8.14795
P19338	Nucleolin OS=Homo sapiens GN=NCL PE=1 SV=3 - [NUCL_HUMAN]	9	5	1	5	9.58	76.5684	4.70361
P46779	60S ribosomal protein L28 OS=Homo sapiens GN=RPL28 PE=1 SV=3 - [RL28_HUMAN]	9	3	1	3	16.79	15.7377	12.0151
P08574	Cytochrome c1, heme protein, mitochondrial OS=Homo sapiens GN=CYC1 PE=1 SV=3 - [CY1_HUMAN]	9	4	1	4	8.31	35.399	8.99756
Q86VH2	Kinesin-like protein KIF27 OS=Homo sapiens GN=KIF27 PE=2 SV=1 - [KIF27_HUMAN]	9	3	1	3	1.78	160.184	7.28369
P40763	Signal transducer and activator of transcription 3 OS=Homo sapiens GN=STAT3 PE=1 SV=2 - [STAT3_HUMAN]	9	4	1	4	7.27	88.0114	6.30322
Q9UH99	SUN domain-containing protein 2 OS=Homo sapiens GN=SUN2 PE=1 SV=3 - [SUN2_HUMAN]	9	3	1	3	6.69	80.2616	6.72705
Q99598	Translin-associated protein X OS=Homo sapiens GN=TSNAX PE=1 SV=1 - [TSNAX_HUMAN]	9	2	1	2	13.45	33.0917	6.55127
Q9Y4E1	WASH complex subunit FAM21C OS=Homo sapiens GN=FAM21C PE=1 SV=3 - [FA21C_HUMAN]	9	2	3	2	2.5	144.581	4.79248
P42766	60S ribosomal protein L35 OS=Homo sapiens GN=RPL35 PE=1 SV=2 - [RL35_HUMAN]	9	2	1	2	15.45	14.5426	11.0483
Q96JB8	MAGUK p55 subfamily member 4 OS=Homo sapiens GN=MPP4 PE=1 SV=2 - [MPP4_HUMAN]	9	3	1	3	7.22	72.7324	5.61768
Q99613	Eukaryotic translation initiation factor 3 subunit C OS=Homo sapiens GN=EIF3C PE=1 SV=1 - [EIF3C_HUMAN]	9	3	2	3	4.82	105.278	5.68115
Q15067	Peroxisomal acyl-coenzyme A oxidase 1 OS=Homo sapiens GN=ACOX1 PE=1 SV=3 - [ACOX1_HUMAN]	9	2	1	2	2.42	74.3762	8.1626
O00754	Lysosomal alpha-mannosidase OS=Homo sapiens GN=MAN2B1 PE=1 SV=3 - [MA2B1_HUMAN]	9	2	1	2	2.47	113.672	7.28369
P11532	Dystrophin OS=Homo sapiens GN=DMD PE=1 SV=3 - [DMD_HUMAN]	9	5	1	5	3.2	426.484	5.88428
Q8TD19	Serine/threonine-protein kinase Nek9 OS=Homo sapiens GN=NEK9 PE=1 SV=2 - [NEK9_HUMAN]	9	2	1	2	5.52	107.1	5.74463
Q8IWX7	Protein unc-45 homolog B OS=Homo sapiens GN=UNC45B PE=1 SV=1 - [UN45B_HUMAN]	9	3	1	3	3.54	103.667	7.81104
P13611	Versican core protein OS=Homo sapiens GN=VCAN PE=1 SV=3 - [CSPG2_HUMAN]	9	3	1	3	0.88	372.59	4.51318
P10145	Interleukin-8 OS=Homo sapiens GN=CXCL8 PE=1 SV=1 - [IL8_HUMAN]	9	2	1	2	25.25	11.0909	8.83643
O14727	Apoptotic protease-activating factor 1 OS=Homo sapiens GN=APAF1 PE=1 SV=2 - [APAF_HUMAN]	9	4	1	4	3.21	141.749	6.40479
Q68CJ6	Nuclear GTPase SLIP-GC OS=Homo sapiens GN=NUGGC PE=2 SV=3 - [SLIP_HUMAN]	9	2	1	2	3.02	91.0745	8.63135
Q12912	Lymphoid-restricted membrane protein OS=Homo sapiens GN=LRMP PE=1 SV=3 - [LRMP_HUMAN]	9	2	1	2	4.32	62.0831	5.84619
Q9UBF9	Myotilin OS=Homo sapiens GN=MYOT PE=1 SV=2 - [MYOTI_HUMAN]	9	2	1	2	4.22	55.3608	9.0708
P55795	Heterogeneous nuclear ribonucleoprotein H2 OS=Homo sapiens GN=HNRNPH2 PE=1 SV=1 - [HNRH2_HUMAN]	8	4	1	2	12.25	49.2323	6.30322
O43747	AP-1 complex subunit gamma-1 OS=Homo sapiens GN=AP1G1 PE=1 SV=5 - [AP1G1_HUMAN]	8	2	1	2	2.68	91.2931	6.80029
Q6IF99	Olfactory receptor 10K2 OS=Homo sapiens GN=OR10K2 PE=3 SV=1 - [O10K2_HUMAN]	8	2	2	2	4.49	35.0056	8.57275
Q9NS87	Kinesin-like protein KIF15 OS=Homo sapiens GN=KIF15 PE=1 SV=1 - [KIF15_HUMAN]	8	3	1	3	2.95	160.061	5.99854
P81534	Beta-defensin 103 OS=Homo sapiens GN=DEFB103A PE=1 SV=2 - [D103A_HUMAN]	8	2	1	2	22.39	7.69215	10.1108
Q96MC4	CEP295 N-terminal-like protein OS=Homo sapiens GN=CEP295NL PE=2 SV=1 - [C295L_HUMAN]	8	2	1	2	2.58	69.7954	9.59814
O15417	Trinucleotide repeat-containing gene 18 protein OS=Homo sapiens GN=TNRC18 PE=1 SV=3 - [TNC18_HUMAN]	8	5	1	5	2.36	314.326	8.70459
Q13296	Mammaglobin-A OS=Homo sapiens GN=SCGB2A2 PE=1 SV=1 - [SG2A2_HUMAN]	8	2	1	2	22.58	10.4921	4.29736
P30085	UMP-CMP kinase OS=Homo sapiens GN=CMPK1 PE=1 SV=3 - [KCY_HUMAN]	8	2	1	2	12.76	22.2083	5.56689
Q7Z7A1	Centriolin OS=Homo sapiens GN=CNTRL PE=1 SV=2 - [CNTRL_HUMAN]	8	2	1	2	2.15	268.72	5.5542
Q96P48	Arf-GAP with Rho-GAP domain, ANK repeat and PH domain-containing protein 1 OS=Homo sapiens GN=ARAP1 PE=1 SV=3 - [ARAP1_HUMAN]	8	2	1	2	1.86	162.089	6.22705
Q92598	Heat shock protein 105 kDa OS=Homo sapiens GN=HSPH1 PE=1 SV=1 - [HS105_HUMAN]	8	2	1	2	3.26	96.8037	5.38916
Q8NFP9	Neurobeachin OS=Homo sapiens GN=NBEA PE=1 SV=3 - [NBEA_HUMAN]	8	2	1	2	0.51	327.614	6.17627
P61421	V-type proton ATPase subunit d 1 OS=Homo sapiens GN=ATP6V0D1 PE=1 SV=1 - [VA0D1_HUMAN]	8	2	1	2	5.41	40.3032	4.99561
Q13200	26S proteasome non-ATPase regulatory subunit 2 OS=Homo sapiens GN=PSMD2 PE=1 SV=3 - [PSMD2_HUMAN]	8	5	1	5	7.27	100.136	5.19873
Q7Z591	AT-hook-containing transcription factor OS=Homo sapiens GN=AKNA PE=1 SV=2 - [AKNA_HUMAN]	8	2	1	2	1.39	155.044	6.31592
Q8WUJ0	Serine/threonine/tyrosine-interacting protein OS=Homo sapiens GN=STYX PE=1 SV=1 - [STYX_HUMAN]	8	2	1	2	10.76	25.4758	6.29053
Q07283	Trichohyalin OS=Homo sapiens GN=TCHH PE=1 SV=2 - [TRHY_HUMAN]	8	4	1	4	2.47	253.777	5.78271
Q96CX2	BTB/POZ domain-containing protein KCTD12 OS=Homo sapiens GN=KCTD12 PE=1 SV=1 - [KCD12_HUMAN]	8	3	2	3	9.23	35.6787	5.64307
Q96QP1	Alpha-protein kinase 1 OS=Homo sapiens GN=ALPK1 PE=2 SV=3 - [ALPK1_HUMAN]	8	2	1	2	3.14	138.774	6.23975
P50148	Guanine nucleotide-binding protein G(q) subunit alpha OS=Homo sapiens GN=GNAQ PE=1 SV=4 - [GNAQ_HUMAN]	8	3	1	2	11.98	42.1153	5.68115
Q687X5	Metalloreductase STEAP4 OS=Homo sapiens GN=STEAP4 PE=1 SV=1 - [STEA4_HUMAN]	8	4	1	4	10.24	51.9475	9.29053
Q9UQ16	Dynamin-3 OS=Homo sapiens GN=DNM3 PE=1 SV=4 - [DYN3_HUMAN]	8	4	1	2	8.17	97.685	8.35303
P16070	CD44 antigen OS=Homo sapiens GN=CD44 PE=1 SV=3 - [CD44_HUMAN]	8	2	1	2	2.96	81.4874	5.32568
P43304	Glycerol-3-phosphate dehydrogenase, mitochondrial OS=Homo sapiens GN=GPD2 PE=1 SV=3 - [GPDM_HUMAN]	8	3	1	3	5.23	80.8016	7.69385
P62888	60S ribosomal protein L30 OS=Homo sapiens GN=RPL30 PE=1 SV=2 - [RL30_HUMAN]	8	3	1	3	34.78	12.7757	9.62744
Q15029	116 kDa U5 small nuclear ribonucleoprotein component OS=Homo sapiens GN=EFTUD2 PE=1 SV=1 - [U5S1_HUMAN]	8	4	1	3	4.63	109.366	4.99561
Q9BTT0	Acidic leucine-rich nuclear phosphoprotein 32 family member E OS=Homo sapiens GN=ANP32E PE=1 SV=1 - [AN32E_HUMAN]	8	3	1	3	15.3	30.6738	3.85303
Q01432	AMP deaminase 3 OS=Homo sapiens GN=AMPD3 PE=1 SV=1 - [AMPD3_HUMAN]	8	3	1	3	3.26	88.7556	6.97607
O14617	AP-3 complex subunit delta-1 OS=Homo sapiens GN=AP3D1 PE=1 SV=1 - [AP3D1_HUMAN]	8	3	1	3	3.3	130.076	8.48486
P13716	Delta-aminolevulinic acid dehydratase OS=Homo sapiens GN=ALAD PE=1 SV=1 - [HEM2_HUMAN]	8	2	1	2	7.27	36.2714	6.78564
P20701	Integrin alpha-L OS=Homo sapiens GN=ITGAL PE=1 SV=3 - [ITAL_HUMAN]	8	3	1	3	2.99	128.688	5.63037
Q5VT06	Centrosome-associated protein 350 OS=Homo sapiens GN=CEP350 PE=1 SV=1 - [CE350_HUMAN]	8	4	1	3	1.48	350.716	6.32861
Q08AI8	Uncharacterized protein C2orf54 OS=Homo sapiens GN=C2orf54 PE=2 SV=2 - [CB054_HUMAN]	8	4	1	4	9.62	49.5338	6.48096
Q6NUK1	Calcium-binding mitochondrial carrier protein SCaMC-1 OS=Homo sapiens GN=SLC25A24 PE=1 SV=2 - [SCMC1_HUMAN]	8	5	1	5	10.69	53.3203	6.32861
P62841	40S ribosomal protein S15 OS=Homo sapiens GN=RPS15 PE=1 SV=2 - [RS15_HUMAN]	8	2	1	2	24.14	17.0292	10.3892
P62081	40S ribosomal protein S7 OS=Homo sapiens GN=RPS7 PE=1 SV=1 - [RS7_HUMAN]	8	4	1	4	8.76	22.1133	10.0962
Q6PL18	ATPase family AAA domain-containing protein 2 OS=Homo sapiens GN=ATAD2 PE=1 SV=1 - [ATAD2_HUMAN]	8	2	1	2	2.52	158.456	6.31592
P07305	Histone H1.0 OS=Homo sapiens GN=H1F0 PE=1 SV=3 - [H10_HUMAN]	8	2	1	2	8.76	20.8502	10.8433
P09131	P3 protein OS=Homo sapiens GN=SLC10A3 PE=2 SV=1 - [P3_HUMAN]	8	3	1	3	10.06	50.3002	7.76709
Q6ZNJ1	Neurobeachin-like protein 2 OS=Homo sapiens GN=NBEAL2 PE=1 SV=2 - [NBEL2_HUMAN]	8	5	1	5	2.43	302.326	6.37939
P09110	3-ketoacyl-CoA thiolase, peroxisomal OS=Homo sapiens GN=ACAA1 PE=1 SV=2 - [THIK_HUMAN]	8	3	1	3	11.08	44.2639	8.44092
Q8N5G2	Macoilin OS=Homo sapiens GN=TMEM57 PE=1 SV=1 - [MACOI_HUMAN]	8	5	1	5	11.14	76.1295	9.0708
P31930	Cytochrome b-c1 complex subunit 1, mitochondrial OS=Homo sapiens GN=UQCRC1 PE=1 SV=3 - [QCR1_HUMAN]	8	3	1	3	6.04	52.6124	6.3667
Q96Q05	Trafficking protein particle complex subunit 9 OS=Homo sapiens GN=TRAPPC9 PE=1 SV=2 - [TPPC9_HUMAN]	8	2	1	2	3.66	128.449	6.62451
Q6ZU69	Protein FAM205A OS=Homo sapiens GN=FAM205A PE=2 SV=4 - [F205A_HUMAN]	8	3	2	3	4.64	148.003	8.29443
O96006	Zinc finger BED domain-containing protein 1 OS=Homo sapiens GN=ZBED1 PE=1 SV=1 - [ZBED1_HUMAN]	8	2	1	2	3.31	78.1056	6.1001
A1KZ92	Peroxidasin-like protein OS=Homo sapiens GN=PXDNL PE=1 SV=3 - [PXDNL_HUMAN]	8	3	1	3	2.73	163.582	7.43018
P51884	Lumican OS=Homo sapiens GN=LUM PE=1 SV=2 - [LUM_HUMAN]	8	3	1	3	9.17	38.4048	6.60986
Q8IYD8	Fanconi anemia group M protein OS=Homo sapiens GN=FANCM PE=1 SV=2 - [FANCM_HUMAN]	8	2	1	2	2.98	232.046	6.11279
Q5CZC0	Fibrous sheath-interacting protein 2 OS=Homo sapiens GN=FSIP2 PE=2 SV=4 - [FSIP2_HUMAN]	8	2	1	2	0.29	780.119	6.7124
Q12770	Sterol regulatory element-binding protein cleavage-activating protein OS=Homo sapiens GN=SCAP PE=1 SV=4 - [SCAP_HUMAN]	7	2	1	2	1.33	139.64	6.85889
Q8IZP2	Putative protein FAM10A4 OS=Homo sapiens GN=ST13P4 PE=5 SV=1 - [ST134_HUMAN]	7	2	3	2	7.08	27.3897	5.08447
Q9NQ38	Serine protease inhibitor Kazal-type 5 OS=Homo sapiens GN=SPINK5 PE=1 SV=2 - [ISK5_HUMAN]	7	5	1	5	5.64	120.637	8.06006
Q9BXL7	Caspase recruitment domain-containing protein 11 OS=Homo sapiens GN=CARD11 PE=1 SV=3 - [CAR11_HUMAN]	7	2	1	2	3.64	133.2	6.0874
P56524	Histone deacetylase 4 OS=Homo sapiens GN=HDAC4 PE=1 SV=3 - [HDAC4_HUMAN]	7	3	1	2	2.03	118.966	6.96143
Q68CZ6	HAUS augmin-like complex subunit 3 OS=Homo sapiens GN=HAUS3 PE=1 SV=1 - [HAUS3_HUMAN]	7	2	1	2	6.14	69.6068	5.5542
P30405	Peptidyl-prolyl cis-trans isomerase F, mitochondrial OS=Homo sapiens GN=PPIF PE=1 SV=1 - [PPIF_HUMAN]	7	2	1	2	8.21	22.0262	9.37842
P84098	60S ribosomal protein L19 OS=Homo sapiens GN=RPL19 PE=1 SV=1 - [RL19_HUMAN]	7	2	1	2	8.67	23.4512	11.4731
Q3SY69	Mitochondrial 10-formyltetrahydrofolate dehydrogenase OS=Homo sapiens GN=ALDH1L2 PE=1 SV=2 - [AL1L2_HUMAN]	7	4	7	4	5.85	101.681	6.52197
Q5VUG0	Scm-like with four MBT domains protein 2 OS=Homo sapiens GN=SFMBT2 PE=1 SV=1 - [SMBT2_HUMAN]	7	2	1	2	2.01	100.498	6.55127
Q92608	Dedicator of cytokinesis protein 2 OS=Homo sapiens GN=DOCK2 PE=1 SV=2 - [DOCK2_HUMAN]	7	5	1	5	4.86	211.812	6.87354
Q6ZR08	Dynein heavy chain 12, axonemal OS=Homo sapiens GN=DNAH12 PE=2 SV=2 - [DYH12_HUMAN]	7	4	1	3	2.55	356.713	6.18896
Q9NQ79	Cartilage acidic protein 1 OS=Homo sapiens GN=CRTAC1 PE=1 SV=2 - [CRAC1_HUMAN]	7	2	1	2	4.54	71.3758	5.12256
Q16555	Dihydropyrimidinase-related protein 2 OS=Homo sapiens GN=DPYSL2 PE=1 SV=1 - [DPYL2_HUMAN]	7	3	1	3	4.9	62.2546	6.37939
Q14397	Glucokinase regulatory protein OS=Homo sapiens GN=GCKR PE=1 SV=6 - [GCKR_HUMAN]	7	2	1	2	5.92	68.6417	6.69775
Q6IE81	Protein Jade-1 OS=Homo sapiens GN=JADE1 PE=1 SV=1 - [JADE1_HUMAN]	7	2	1	2	2.85	95.4727	7.91357
Q96K83	Zinc finger protein 521 OS=Homo sapiens GN=ZNF521 PE=1 SV=1 - [ZN521_HUMAN]	7	2	1	2	4.04	147.77	7.00537
Q9H6S0	Probable ATP-dependent RNA helicase YTHDC2 OS=Homo sapiens GN=YTHDC2 PE=1 SV=2 - [YTDC2_HUMAN]	7	2	1	2	2.8	160.147	8.39697
Q92841	Probable ATP-dependent RNA helicase DDX17 OS=Homo sapiens GN=DDX17 PE=1 SV=2 - [DDX17_HUMAN]	7	4	2	4	5.76	80.222	8.26514
Q9NYC9	Dynein heavy chain 9, axonemal OS=Homo sapiens GN=DNAH9 PE=1 SV=3 - [DYH9_HUMAN]	7	4	1	3	1.85	511.551	5.90967
Q8N539	Fibrinogen C domain-containing protein 1 OS=Homo sapiens GN=FIBCD1 PE=1 SV=2 - [FBCD1_HUMAN]	7	2	1	2	12.36	50.712	6.48096
O00748	Cocaine esterase OS=Homo sapiens GN=CES2 PE=1 SV=1 - [EST2_HUMAN]	7	4	1	4	10.73	61.7672	6.1001
Q9Y2Q3	Glutathione S-transferase kappa 1 OS=Homo sapiens GN=GSTK1 PE=1 SV=3 - [GSTK1_HUMAN]	7	4	1	4	23.89	25.4803	8.41162
O14980	Exportin-1 OS=Homo sapiens GN=XPO1 PE=1 SV=1 - [XPO1_HUMAN]	7	3	1	3	2.71	123.306	6.06201
Q9NZ01	Very-long-chain enoyl-CoA reductase OS=Homo sapiens GN=TECR PE=1 SV=1 - [TECR_HUMAN]	7	3	1	3	9.74	36.0108	9.45166
O14879	Interferon-induced protein with tetratricopeptide repeats 3 OS=Homo sapiens GN=IFIT3 PE=1 SV=1 - [IFIT3_HUMAN]	7	4	1	4	8.98	55.9495	5.19873
O75888	Tumor necrosis factor ligand superfamily member 13 OS=Homo sapiens GN=TNFSF13 PE=1 SV=1 - [TNF13_HUMAN]	7	2	1	2	9.6	27.4161	9.62744
P09913	Interferon-induced protein with tetratricopeptide repeats 2 OS=Homo sapiens GN=IFIT2 PE=1 SV=1 - [IFIT2_HUMAN]	7	3	1	2	5.93	54.5975	6.75635
P10768	S-formylglutathione hydrolase OS=Homo sapiens GN=ESD PE=1 SV=2 - [ESTD_HUMAN]	7	3	1	3	15.96	31.4425	7.02002
P22792	Carboxypeptidase N subunit 2 OS=Homo sapiens GN=CPN2 PE=1 SV=3 - [CPN2_HUMAN]	7	5	1	5	18.17	60.5181	5.98584
Q7KZF4	Staphylococcal nuclease domain-containing protein 1 OS=Homo sapiens GN=SND1 PE=1 SV=1 - [SND1_HUMAN]	7	3	1	3	2.53	101.934	7.1665
Q92835	Phosphatidylinositol 3,4,5-trisphosphate 5-phosphatase 1 OS=Homo sapiens GN=INPP5D PE=1 SV=2 - [SHIP1_HUMAN]	7	2	1	2	2.52	133.209	7.59131
Q9P212	1-phosphatidylinositol 4,5-bisphosphate phosphodiesterase epsilon-1 OS=Homo sapiens GN=PLCE1 PE=1 SV=3 - [PLCE1_HUMAN]	7	2	1	2	1.95	258.551	6.48096
O75947	ATP synthase subunit d, mitochondrial OS=Homo sapiens GN=ATP5H PE=1 SV=3 - [ATP5H_HUMAN]	7	2	1	2	23.6	18.4795	5.30029
P03956	Interstitial collagenase OS=Homo sapiens GN=MMP1 PE=1 SV=3 - [MMP1_HUMAN]	7	2	1	2	4.9	53.9728	6.96143
P17987	T-complex protein 1 subunit alpha OS=Homo sapiens GN=TCP1 PE=1 SV=1 - [TCPA_HUMAN]	7	4	1	4	6.83	60.3056	6.11279
P09382	Galectin-1 OS=Homo sapiens GN=LGALS1 PE=1 SV=2 - [LEG1_HUMAN]	7	2	1	2	11.85	14.7062	5.50342
Q9Y6K0	Choline/ethanolaminephosphotransferase 1 OS=Homo sapiens GN=CEPT1 PE=1 SV=1 - [CEPT1_HUMAN]	7	2	1	2	7.45	46.5227	8.20654
P10632	Cytochrome P450 2C8 OS=Homo sapiens GN=CYP2C8 PE=1 SV=2 - [CP2C8_HUMAN]	7	2	2	2	5.92	55.7887	8.49951
P62714	Serine/threonine-protein phosphatase 2A catalytic subunit beta isoform OS=Homo sapiens GN=PPP2CB PE=1 SV=1 - [PP2AB_HUMAN]	7	2	2	2	8.09	35.5523	5.42725
Q9UG01	Intraflagellar transport protein 172 homolog OS=Homo sapiens GN=IFT172 PE=1 SV=2 - [IF172_HUMAN]	7	3	1	3	2.29	197.451	6.12549
Q16658	Fascin OS=Homo sapiens GN=FSCN1 PE=1 SV=3 - [FSCN1_HUMAN]	7	2	1	2	4.06	54.4961	7.23975
Q562E7	WD repeat-containing protein 81 OS=Homo sapiens GN=WDR81 PE=1 SV=2 - [WDR81_HUMAN]	7	2	1	2	2.01	211.564	5.57959
Q9BUL8	Programmed cell death protein 10 OS=Homo sapiens GN=PDCD10 PE=1 SV=1 - [PDC10_HUMAN]	7	4	1	4	31.13	24.6858	8.19189
P10515	Dihydrolipoyllysine-residue acetyltransferase component of pyruvate dehydrogenase complex, mitochondrial OS=Homo sapiens GN=DLAT PE=1 SV=3 - [ODP2_HUMAN]	7	2	1	2	3.55	68.9531	7.84033
P16885	1-phosphatidylinositol 4,5-bisphosphate phosphodiesterase gamma-2 OS=Homo sapiens GN=PLCG2 PE=1 SV=4 - [PLCG2_HUMAN]	7	3	1	3	3.08	147.776	6.63916
Q0VDD8	Dynein heavy chain 14, axonemal OS=Homo sapiens GN=DNAH14 PE=2 SV=3 - [DYH14_HUMAN]	7	5	1	3	2.34	399.64	6.93213
O00602	Ficolin-1 OS=Homo sapiens GN=FCN1 PE=1 SV=2 - [FCN1_HUMAN]	7	3	1	3	9.82	35.0561	6.85889
Q9ULL8	Protein Shroom4 OS=Homo sapiens GN=SHROOM4 PE=1 SV=3 - [SHRM4_HUMAN]	7	2	1	2	2.55	164.754	6.65381
Q5S007	Leucine-rich repeat serine/threonine-protein kinase 2 OS=Homo sapiens GN=LRRK2 PE=1 SV=2 - [LRRK2_HUMAN]	7	4	1	4	2.53	285.919	6.80029
P01814	Immunoglobulin heavy variable 2-70 OS=Homo sapiens GN=IGHV2-70 PE=1 SV=2 - [HV270_HUMAN]	7	2	1	2	13.45	13.2517	6.52197
O00411	DNA-directed RNA polymerase, mitochondrial OS=Homo sapiens GN=POLRMT PE=1 SV=2 - [RPOM_HUMAN]	7	2	1	2	2.6	138.532	8.98291
P45974	Ubiquitin carboxyl-terminal hydrolase 5 OS=Homo sapiens GN=USP5 PE=1 SV=2 - [UBP5_HUMAN]	7	2	1	2	2.45	95.7253	5.03369
P06727	Apolipoprotein A-IV OS=Homo sapiens GN=APOA4 PE=1 SV=3 - [APOA4_HUMAN]	7	3	1	3	8.84	45.3715	5.37646
O60292	Signal-induced proliferation-associated 1-like protein 3 OS=Homo sapiens GN=SIPA1L3 PE=1 SV=3 - [SI1L3_HUMAN]	7	2	1	2	1.29	194.49	8.32373
Q96JP2	Unconventional myosin-XVB OS=Homo sapiens GN=MYO15B PE=1 SV=2 - [MY15B_HUMAN]	7	2	1	2	1.5	167.013	8.41162
Q96RW7	Hemicentin-1 OS=Homo sapiens GN=HMCN1 PE=1 SV=2 - [HMCN1_HUMAN]	7	3	1	3	1.12	613.001	6.49365
Q14406	Chorionic somatomammotropin hormone-like 1 OS=Homo sapiens GN=CSHL1 PE=2 SV=2 - [CSHL_HUMAN]	7	2	1	2	17.12	25.3745	5.90967
Q5T9S5	Coiled-coil domain-containing protein 18 OS=Homo sapiens GN=CCDC18 PE=1 SV=1 - [CCD18_HUMAN]	7	3	1	3	3.3	168.857	5.65576
O43303	Centriolar coiled-coil protein of 110 kDa OS=Homo sapiens GN=CCP110 PE=1 SV=3 - [CP110_HUMAN]	7	3	1	3	3.95	113.353	8.646
Q12879	Glutamate receptor ionotropic, NMDA 2A OS=Homo sapiens GN=GRIN2A PE=1 SV=1 - [NMDE1_HUMAN]	7	2	1	2	4.1	165.177	7.10791
Q07954	Prolow-density lipoprotein receptor-related protein 1 OS=Homo sapiens GN=LRP1 PE=1 SV=2 - [LRP1_HUMAN]	7	5	1	5	2.09	504.276	5.38916
Q92624	Amyloid protein-binding protein 2 OS=Homo sapiens GN=APPBP2 PE=1 SV=2 - [APBP2_HUMAN]	7	2	1	2	11.28	66.8109	6.90283
Q6UXV0	GDNF family receptor alpha-like OS=Homo sapiens GN=GFRAL PE=2 SV=2 - [GFRAL_HUMAN]	7	2	1	2	14.72	44.4882	7.88428
P12110	Collagen alpha-2(VI) chain OS=Homo sapiens GN=COL6A2 PE=1 SV=4 - [CO6A2_HUMAN]	7	3	1	3	2.94	108.512	6.21436
P02549	Spectrin alpha chain, erythrocytic 1 OS=Homo sapiens GN=SPTA1 PE=1 SV=5 - [SPTA1_HUMAN]	7	6	1	6	2.81	279.842	5.04639
Q7Z570	Zinc finger protein 804A OS=Homo sapiens GN=ZNF804A PE=1 SV=3 - [Z804A_HUMAN]	7	2	1	2	2.15	136.802	7.94287
P10253	Lysosomal alpha-glucosidase OS=Homo sapiens GN=GAA PE=1 SV=4 - [LYAG_HUMAN]	7	3	1	3	5.78	105.257	5.99854
P47897	Glutamine--tRNA ligase OS=Homo sapiens GN=QARS PE=1 SV=1 - [SYQ_HUMAN]	6	3	1	3	3.74	87.7429	7.15186
Q8NFU4	Follicular dendritic cell secreted peptide OS=Homo sapiens GN=FDCSP PE=1 SV=1 - [FDSCP_HUMAN]	6	2	1	2	21.18	9.69419	9.31982
Q9NXR1	Nuclear distribution protein nudE homolog 1 OS=Homo sapiens GN=NDE1 PE=1 SV=2 - [NDE1_HUMAN]	6	2	2	2	4.34	38.7845	5.2749
Q9UKN1	Mucin-12 OS=Homo sapiens GN=MUC12 PE=1 SV=2 - [MUC12_HUMAN]	6	2	1	2	1.15	557.831	5.5542
P50238	Cysteine-rich protein 1 OS=Homo sapiens GN=CRIP1 PE=1 SV=3 - [CRIP1_HUMAN]	6	2	1	2	19.48	8.52701	8.74854
Q6ZVL6	UPF0606 protein KIAA1549L OS=Homo sapiens GN=KIAA1549L PE=2 SV=2 - [K154L_HUMAN]	6	2	1	2	1.51	198.876	8.30908
P98171	Rho GTPase-activating protein 4 OS=Homo sapiens GN=ARHGAP4 PE=1 SV=2 - [RHG04_HUMAN]	6	3	1	3	3.07	104.96	6.34131
Q96DT5	Dynein heavy chain 11, axonemal OS=Homo sapiens GN=DNAH11 PE=1 SV=4 - [DYH11_HUMAN]	6	4	1	3	1.17	520.038	6.44287
O75882	Attractin OS=Homo sapiens GN=ATRN PE=1 SV=2 - [ATRN_HUMAN]	6	3	1	3	2.24	158.432	7.31299
Q14669	E3 ubiquitin-protein ligase TRIP12 OS=Homo sapiens GN=TRIP12 PE=1 SV=1 - [TRIPC_HUMAN]	6	2	4	2	1.76	220.296	8.48486
Q8IWZ3	Ankyrin repeat and KH domain-containing protein 1 OS=Homo sapiens GN=ANKHD1 PE=1 SV=1 - [ANKH1_HUMAN]	6	4	1	4	1.46	269.291	5.73193
Q8TE73	Dynein heavy chain 5, axonemal OS=Homo sapiens GN=DNAH5 PE=1 SV=3 - [DYH5_HUMAN]	6	4	1	3	1.21	528.684	6.1001
Q9BQB6	Vitamin K epoxide reductase complex subunit 1 OS=Homo sapiens GN=VKORC1 PE=1 SV=1 - [VKOR1_HUMAN]	6	2	1	2	31.9	18.2225	9.36377
P61289	Proteasome activator complex subunit 3 OS=Homo sapiens GN=PSME3 PE=1 SV=1 - [PSME3_HUMAN]	6	2	1	2	10.24	29.4876	5.94775
O94973	AP-2 complex subunit alpha-2 OS=Homo sapiens GN=AP2A2 PE=1 SV=2 - [AP2A2_HUMAN]	6	3	1	2	3.73	103.895	6.96143
P26196	Probable ATP-dependent RNA helicase DDX6 OS=Homo sapiens GN=DDX6 PE=1 SV=2 - [DDX6_HUMAN]	6	4	1	4	9.94	54.3823	8.66064
Q86SQ4	G-protein coupled receptor 126 OS=Homo sapiens GN=GPR126 PE=1 SV=3 - [GP126_HUMAN]	6	3	1	3	4.26	136.607	7.86963
P10620	Microsomal glutathione S-transferase 1 OS=Homo sapiens GN=MGST1 PE=1 SV=1 - [MGST1_HUMAN]	6	3	1	3	27.1	17.5872	9.39307
Q68E01	Integrator complex subunit 3 OS=Homo sapiens GN=INTS3 PE=1 SV=1 - [INT3_HUMAN]	6	3	1	3	4.99	117.994	5.79541
Q13576	Ras GTPase-activating-like protein IQGAP2 OS=Homo sapiens GN=IQGAP2 PE=1 SV=4 - [IQGA2_HUMAN]	6	3	2	2	2.41	180.465	5.64307
Q2KHT3	Protein CLEC16A OS=Homo sapiens GN=CLEC16A PE=1 SV=2 - [CL16A_HUMAN]	6	2	1	2	3.23	117.64	5.85889
Q92989	Polyribonucleotide 5'-hydroxyl-kinase Clp1 OS=Homo sapiens GN=CLP1 PE=1 SV=1 - [CLP1_HUMAN]	6	2	1	2	4.24	47.6153	6.62451
O75369	Filamin-B OS=Homo sapiens GN=FLNB PE=1 SV=2 - [FLNB_HUMAN]	6	4	1	3	1.73	277.99	5.73193
P14902	Indoleamine 2,3-dioxygenase 1 OS=Homo sapiens GN=IDO1 PE=1 SV=1 - [I23O1_HUMAN]	6	4	1	4	9.43	45.2972	7.29834
Q96N66	Lysophospholipid acyltransferase 7 OS=Homo sapiens GN=MBOAT7 PE=1 SV=2 - [MBOA7_HUMAN]	6	2	1	2	8.05	52.7303	8.96826
Q8NBM8	Prenylcysteine oxidase-like OS=Homo sapiens GN=PCYOX1L PE=1 SV=2 - [PCYXL_HUMAN]	6	2	1	2	4.05	54.6119	7.31299
Q9H223	EH domain-containing protein 4 OS=Homo sapiens GN=EHD4 PE=1 SV=1 - [EHD4_HUMAN]	6	5	1	4	10.35	61.1365	6.75635
Q9UIF9	Bromodomain adjacent to zinc finger domain protein 2A OS=Homo sapiens GN=BAZ2A PE=1 SV=4 - [BAZ2A_HUMAN]	6	4	1	4	2.94	211.065	6.63916
O43488	Aflatoxin B1 aldehyde reductase member 2 OS=Homo sapiens GN=AKR7A2 PE=1 SV=3 - [ARK72_HUMAN]	6	2	2	2	9.47	39.5637	7.1665
P05161	Ubiquitin-like protein ISG15 OS=Homo sapiens GN=ISG15 PE=1 SV=5 - [ISG15_HUMAN]	6	3	1	3	18.79	17.8763	7.44482
P48643	T-complex protein 1 subunit epsilon OS=Homo sapiens GN=CCT5 PE=1 SV=1 - [TCPE_HUMAN]	6	3	1	2	8.32	59.6328	5.65576
P53999	Activated RNA polymerase II transcriptional coactivator p15 OS=Homo sapiens GN=SUB1 PE=1 SV=3 - [TCP4_HUMAN]	6	3	1	3	26.77	14.3864	9.59814
Q7L591	Docking protein 3 OS=Homo sapiens GN=DOK3 PE=1 SV=2 - [DOK3_HUMAN]	6	3	1	3	13.1	53.2549	7.76709
Q8IYM9	E3 ubiquitin-protein ligase TRIM22 OS=Homo sapiens GN=TRIM22 PE=1 SV=1 - [TRI22_HUMAN]	6	2	1	2	9.44	56.9106	7.72314
Q99996	A-kinase anchor protein 9 OS=Homo sapiens GN=AKAP9 PE=1 SV=3 - [AKAP9_HUMAN]	6	5	1	5	2.05	453.387	4.98291
Q15008	26S proteasome non-ATPase regulatory subunit 6 OS=Homo sapiens GN=PSMD6 PE=1 SV=1 - [PSMD6_HUMAN]	6	3	1	3	9	45.5023	5.61768
P17612	cAMP-dependent protein kinase catalytic subunit alpha OS=Homo sapiens GN=PRKACA PE=1 SV=2 - [KAPCA_HUMAN]	6	3	3	3	8.83	40.564	8.79248
O43242	26S proteasome non-ATPase regulatory subunit 3 OS=Homo sapiens GN=PSMD3 PE=1 SV=2 - [PSMD3_HUMAN]	6	3	1	3	7.3	60.9395	8.44092
P05198	Eukaryotic translation initiation factor 2 subunit 1 OS=Homo sapiens GN=EIF2S1 PE=1 SV=3 - [IF2A_HUMAN]	6	2	1	2	10.48	36.0894	5.08447
P05362	Intercellular adhesion molecule 1 OS=Homo sapiens GN=ICAM1 PE=1 SV=2 - [ICAM1_HUMAN]	6	2	1	2	4.51	57.789	7.98682
P34932	Heat shock 70 kDa protein 4 OS=Homo sapiens GN=HSPA4 PE=1 SV=4 - [HSP74_HUMAN]	6	4	1	4	7.74	94.2712	5.18604
Q04760	Lactoylglutathione lyase OS=Homo sapiens GN=GLO1 PE=1 SV=4 - [LGUL_HUMAN]	6	3	1	3	13.04	20.7642	5.31299
Q1KMD3	Heterogeneous nuclear ribonucleoprotein U-like protein 2 OS=Homo sapiens GN=HNRNPUL2 PE=1 SV=1 - [HNRL2_HUMAN]	6	3	1	3	4.28	85.0522	4.90674
Q8IXQ6	Poly [ADP-ribose] polymerase 9 OS=Homo sapiens GN=PARP9 PE=1 SV=2 - [PARP9_HUMAN]	6	2	1	2	2.22	96.2814	7.91357
Q92626	Peroxidasin homolog OS=Homo sapiens GN=PXDN PE=1 SV=2 - [PXDN_HUMAN]	6	2	1	2	1.56	165.17	7.1665
P00387	NADH-cytochrome b5 reductase 3 OS=Homo sapiens GN=CYB5R3 PE=1 SV=3 - [NB5R3_HUMAN]	6	2	1	2	9.3	34.2127	7.59131
P56377	AP-1 complex subunit sigma-2 OS=Homo sapiens GN=AP1S2 PE=1 SV=1 - [AP1S2_HUMAN]	6	3	2	3	16.56	18.6028	5.46533
P42765	3-ketoacyl-CoA thiolase, mitochondrial OS=Homo sapiens GN=ACAA2 PE=1 SV=2 - [THIM_HUMAN]	6	4	1	4	13.35	41.8976	8.08936
Q96HC4	PDZ and LIM domain protein 5 OS=Homo sapiens GN=PDLIM5 PE=1 SV=5 - [PDLI5_HUMAN]	6	2	1	2	2.85	63.9045	8.20654
Q9HCS7	Pre-mRNA-splicing factor SYF1 OS=Homo sapiens GN=XAB2 PE=1 SV=2 - [SYF1_HUMAN]	6	2	1	2	5.73	99.9464	6.22705
Q96SZ4	Zinc finger and SCAN domain-containing protein 10 OS=Homo sapiens GN=ZSCAN10 PE=1 SV=1 - [ZSC10_HUMAN]	6	2	1	2	10.07	80.3359	8.80713
Q17RW2	Collagen alpha-1(XXIV) chain OS=Homo sapiens GN=COL24A1 PE=1 SV=2 - [COOA1_HUMAN]	6	3	1	3	2.33	175.388	8.26514
P49247	Ribose-5-phosphate isomerase OS=Homo sapiens GN=RPIA PE=1 SV=3 - [RPIA_HUMAN]	6	5	1	4	20.9	33.248	8.54346
Q99653	Calcineurin B homologous protein 1 OS=Homo sapiens GN=CHP1 PE=1 SV=3 - [CHP1_HUMAN]	6	3	1	3	20	22.4423	5.09717
Q96L03	Spermatogenesis-associated protein 17 OS=Homo sapiens GN=SPATA17 PE=2 SV=1 - [SPT17_HUMAN]	6	3	1	3	19.94	43.4716	9.86182
P28062	Proteasome subunit beta type-8 OS=Homo sapiens GN=PSMB8 PE=1 SV=3 - [PSB8_HUMAN]	6	3	1	3	10.51	30.3346	7.43018
Q9BXR0	Queuine tRNA-ribosyltransferase catalytic subunit OS=Homo sapiens GN=QTRT1 PE=1 SV=3 - [TGT_HUMAN]	6	3	1	3	15.38	44.0191	7.2251
Q6ZP82	Coiled-coil domain-containing protein 141 OS=Homo sapiens GN=CCDC141 PE=1 SV=2 - [CC141_HUMAN]	6	2	1	2	2.83	166.157	5.57959
P15822	Zinc finger protein 40 OS=Homo sapiens GN=HIVEP1 PE=1 SV=3 - [ZEP1_HUMAN]	6	2	1	2	2.32	296.681	7.84033
Q9NTJ5	Phosphatidylinositide phosphatase SAC1 OS=Homo sapiens GN=SACM1L PE=1 SV=2 - [SAC1_HUMAN]	6	4	1	4	11.24	66.924	7.12256
Q9H254	Spectrin beta chain, non-erythrocytic 4 OS=Homo sapiens GN=SPTBN4 PE=1 SV=2 - [SPTN4_HUMAN]	6	5	1	3	2.57	288.808	6.01123
Q9UIR0	Butyrophilin-like protein 2 OS=Homo sapiens GN=BTNL2 PE=2 SV=1 - [BTNL2_HUMAN]	6	2	1	2	5.71	50.404	5.07178
Q93009	Ubiquitin carboxyl-terminal hydrolase 7 OS=Homo sapiens GN=USP7 PE=1 SV=2 - [UBP7_HUMAN]	6	3	1	3	4.54	128.22	5.5542
P27352	Gastric intrinsic factor OS=Homo sapiens GN=GIF PE=1 SV=2 - [IF_HUMAN]	6	4	1	4	7.67	45.387	6.13818
Q9HCP0	Casein kinase I isoform gamma-1 OS=Homo sapiens GN=CSNK1G1 PE=1 SV=1 - [KC1G1_HUMAN]	6	2	3	2	4.98	48.4806	9.01221
B0I1T2	Unconventional myosin-Ig OS=Homo sapiens GN=MYO1G PE=1 SV=2 - [MYO1G_HUMAN]	6	3	1	3	3.73	116.369	8.73389
Q15643	Thyroid receptor-interacting protein 11 OS=Homo sapiens GN=TRIP11 PE=1 SV=3 - [TRIPB_HUMAN]	6	3	1	3	1.87	227.447	5.26221
P21695	Glycerol-3-phosphate dehydrogenase [NAD(+)], cytoplasmic OS=Homo sapiens GN=GPD1 PE=1 SV=4 - [GPDA_HUMAN]	6	2	1	2	13.47	37.5433	6.17627
Q9HC10	Otoferlin OS=Homo sapiens GN=OTOF PE=1 SV=3 - [OTOF_HUMAN]	6	2	1	2	2.05	226.61	5.69385
Q14155	Rho guanine nucleotide exchange factor 7 OS=Homo sapiens GN=ARHGEF7 PE=1 SV=2 - [ARHG7_HUMAN]	6	2	1	2	5.85	89.9553	7.09326
P59510	A disintegrin and metalloproteinase with thrombospondin motifs 20 OS=Homo sapiens GN=ADAMTS20 PE=2 SV=2 - [ATS20_HUMAN]	6	2	1	2	3.19	214.58	7.21045
Q15056	Eukaryotic translation initiation factor 4H OS=Homo sapiens GN=EIF4H PE=1 SV=5 - [IF4H_HUMAN]	6	2	1	2	16.94	27.3684	7.2251
Q86V25	Vasohibin-2 OS=Homo sapiens GN=VASH2 PE=1 SV=2 - [VASH2_HUMAN]	6	2	1	2	9.3	40.424	10.0083
P52179	Myomesin-1 OS=Homo sapiens GN=MYOM1 PE=1 SV=2 - [MYOM1_HUMAN]	6	2	1	2	1.72	187.509	6.93213
Q8IZH2	5'-3' exoribonuclease 1 OS=Homo sapiens GN=XRN1 PE=1 SV=1 - [XRN1_HUMAN]	6	2	1	2	2.17	193.985	7.21045
Q15911	Zinc finger homeobox protein 3 OS=Homo sapiens GN=ZFHX3 PE=1 SV=2 - [ZFHX3_HUMAN]	6	2	1	2	1.81	404.165	6.20166
O14647	Chromodomain-helicase-DNA-binding protein 2 OS=Homo sapiens GN=CHD2 PE=1 SV=2 - [CHD2_HUMAN]	5	4	2	3	3.39	211.214	8.104
Q9Y4C1	Lysine-specific demethylase 3A OS=Homo sapiens GN=KDM3A PE=1 SV=4 - [KDM3A_HUMAN]	5	3	1	3	2.65	147.248	8.07471
Q9H6B9	Epoxide hydrolase 3 OS=Homo sapiens GN=EPHX3 PE=2 SV=1 - [EPHX3_HUMAN]	5	2	1	2	14.17	40.882	7.76709
Q8N612	FTS and Hook-interacting protein OS=Homo sapiens GN=FAM160A2 PE=1 SV=3 - [F16A2_HUMAN]	5	2	1	2	3.6	105.502	6.771
Q96JN2	Coiled-coil domain-containing protein 136 OS=Homo sapiens GN=CCDC136 PE=1 SV=3 - [CC136_HUMAN]	5	2	1	2	3.55	133.961	4.65283
Q8WXG9	G-protein coupled receptor 98 OS=Homo sapiens GN=GPR98 PE=1 SV=2 - [GPR98_HUMAN]	5	3	2	3	0.62	692.637	4.64014
Q9P0L0	Vesicle-associated membrane protein-associated protein A OS=Homo sapiens GN=VAPA PE=1 SV=3 - [VAPA_HUMAN]	5	3	2	3	14.46	27.8752	8.6167
Q969L4	U7 snRNA-associated Sm-like protein LSm10 OS=Homo sapiens GN=LSM10 PE=1 SV=1 - [LSM10_HUMAN]	5	2	1	2	11.38	14.0714	9.24658
Q9BRA2	Thioredoxin domain-containing protein 17 OS=Homo sapiens GN=TXNDC17 PE=1 SV=1 - [TXD17_HUMAN]	5	2	1	2	15.45	13.9318	5.51611
Q9NV70	Exocyst complex component 1 OS=Homo sapiens GN=EXOC1 PE=1 SV=4 - [EXOC1_HUMAN]	5	2	1	2	1.79	101.917	6.60986
Q15811	Intersectin-1 OS=Homo sapiens GN=ITSN1 PE=1 SV=3 - [ITSN1_HUMAN]	5	3	1	3	4.65	195.3	7.76709
P20933	N(4)-(beta-N-acetylglucosaminyl)-L-asparaginase OS=Homo sapiens GN=AGA PE=1 SV=2 - [ASPG_HUMAN]	5	2	1	2	5.78	37.1843	6.27783
Q15005	Signal peptidase complex subunit 2 OS=Homo sapiens GN=SPCS2 PE=1 SV=3 - [SPCS2_HUMAN]	5	2	1	2	6.64	24.9867	8.47021
Q5W0V3	Protein FAM160B1 OS=Homo sapiens GN=FAM160B1 PE=1 SV=1 - [F16B1_HUMAN]	5	2	1	2	4.44	86.5031	5.2876
Q9NS15	Latent-transforming growth factor beta-binding protein 3 OS=Homo sapiens GN=LTBP3 PE=1 SV=4 - [LTBP3_HUMAN]	5	2	1	2	3.38	139.267	6.07471
Q8TC59	Piwi-like protein 2 OS=Homo sapiens GN=PIWIL2 PE=1 SV=1 - [PIWL2_HUMAN]	5	2	1	2	2.47	109.778	8.98291
Q03519	Antigen peptide transporter 2 OS=Homo sapiens GN=TAP2 PE=1 SV=1 - [TAP2_HUMAN]	5	2	1	2	2.62	75.6158	8.01611
P07814	Bifunctional glutamate/proline--tRNA ligase OS=Homo sapiens GN=EPRS PE=1 SV=5 - [SYEP_HUMAN]	5	2	1	2	1.39	170.483	7.32764
O95235	Kinesin-like protein KIF20A OS=Homo sapiens GN=KIF20A PE=1 SV=1 - [KI20A_HUMAN]	5	2	1	2	5.39	100.215	6.91748
Q96S96	Phosphatidylethanolamine-binding protein 4 OS=Homo sapiens GN=PEBP4 PE=1 SV=3 - [PEBP4_HUMAN]	5	3	1	3	11.01	25.7168	6.53662
O43827	Angiopoietin-related protein 7 OS=Homo sapiens GN=ANGPTL7 PE=1 SV=1 - [ANGL7_HUMAN]	5	2	1	2	8.09	39.9927	7.85498
O60762	Dolichol-phosphate mannosyltransferase subunit 1 OS=Homo sapiens GN=DPM1 PE=1 SV=1 - [DPM1_HUMAN]	5	2	1	2	12.69	29.6158	9.56885
Q13464	Rho-associated protein kinase 1 OS=Homo sapiens GN=ROCK1 PE=1 SV=1 - [ROCK1_HUMAN]	5	2	1	2	1.33	158.076	5.89697
P07357	Complement component C8 alpha chain OS=Homo sapiens GN=C8A PE=1 SV=2 - [CO8A_HUMAN]	5	3	1	3	6.51	65.121	6.46826
P07358	Complement component C8 beta chain OS=Homo sapiens GN=C8B PE=1 SV=3 - [CO8B_HUMAN]	5	3	1	3	7.78	67.0035	8.1333
Q8TD55	Pleckstrin homology domain-containing family O member 2 OS=Homo sapiens GN=PLEKHO2 PE=1 SV=1 - [PKHO2_HUMAN]	5	2	1	2	6.73	53.3171	5.42725
O43683	Mitotic checkpoint serine/threonine-protein kinase BUB1 OS=Homo sapiens GN=BUB1 PE=1 SV=1 - [BUB1_HUMAN]	5	2	1	2	3.32	122.297	6.46826
O75396	Vesicle-trafficking protein SEC22b OS=Homo sapiens GN=SEC22B PE=1 SV=4 - [SC22B_HUMAN]	5	4	1	3	20.47	24.5775	6.91748
P11586	C-1-tetrahydrofolate synthase, cytoplasmic OS=Homo sapiens GN=MTHFD1 PE=1 SV=3 - [C1TC_HUMAN]	5	4	1	4	4.49	101.495	7.29834
P52630	Signal transducer and activator of transcription 2 OS=Homo sapiens GN=STAT2 PE=1 SV=1 - [STAT2_HUMAN]	5	3	1	3	4.58	97.8546	5.49072
Q9P0S9	Transmembrane protein 14C OS=Homo sapiens GN=TMEM14C PE=1 SV=1 - [TM14C_HUMAN]	5	2	1	2	41.07	11.557	9.87646
P55157	Microsomal triglyceride transfer protein large subunit OS=Homo sapiens GN=MTTP PE=1 SV=1 - [MTP_HUMAN]	5	2	1	2	4.25	99.2888	8.41162
Q13630	GDP-L-fucose synthase OS=Homo sapiens GN=TSTA3 PE=1 SV=1 - [FCL_HUMAN]	5	3	1	3	14.02	35.87	6.59521
Q15404	Ras suppressor protein 1 OS=Homo sapiens GN=RSU1 PE=1 SV=3 - [RSU1_HUMAN]	5	3	1	3	24.19	31.5207	8.646
Q92622	Run domain Beclin-1-interacting and cysteine-rich domain-containing protein OS=Homo sapiens GN=RUBCN PE=1 SV=4 - [RUBIC_HUMAN]	5	2	1	2	3.81	108.553	6.25244
Q92945	Far upstream element-binding protein 2 OS=Homo sapiens GN=KHSRP PE=1 SV=4 - [FUBP2_HUMAN]	5	2	1	2	4.92	73.07	7.29834
Q9HAT2	Sialate O-acetylesterase OS=Homo sapiens GN=SIAE PE=1 SV=1 - [SIAE_HUMAN]	5	3	1	3	7.84	58.2771	7.32764
P49591	Serine--tRNA ligase, cytoplasmic OS=Homo sapiens GN=SARS PE=1 SV=3 - [SYSC_HUMAN]	5	2	1	2	5.06	58.7401	6.43018
P28482	Mitogen-activated protein kinase 1 OS=Homo sapiens GN=MAPK1 PE=1 SV=3 - [MK01_HUMAN]	5	3	10	2	9.17	41.3632	6.97607
Q9H9B4	Sideroflexin-1 OS=Homo sapiens GN=SFXN1 PE=1 SV=4 - [SFXN1_HUMAN]	5	2	1	2	13.66	35.5963	9.0708
Q12792	Twinfilin-1 OS=Homo sapiens GN=TWF1 PE=1 SV=3 - [TWF1_HUMAN]	5	3	1	2	6.57	40.2577	6.96143
Q6ZT07	TBC1 domain family member 9 OS=Homo sapiens GN=TBC1D9 PE=2 SV=2 - [TBCD9_HUMAN]	5	4	1	4	4.42	143.138	5.31299
Q6UWE0	E3 ubiquitin-protein ligase LRSAM1 OS=Homo sapiens GN=LRSAM1 PE=1 SV=1 - [LRSM1_HUMAN]	5	2	1	2	3.87	83.541	5.93506
Q9UHD8	Septin-9 OS=Homo sapiens GN=SEPT9 PE=1 SV=2 - [SEPT9_HUMAN]	5	2	1	2	3.24	65.3608	8.96826
P62899	60S ribosomal protein L31 OS=Homo sapiens GN=RPL31 PE=1 SV=1 - [RL31_HUMAN]	5	2	1	2	16.8	14.4539	10.5356
P57078	Receptor-interacting serine/threonine-protein kinase 4 OS=Homo sapiens GN=RIPK4 PE=1 SV=1 - [RIPK4_HUMAN]	5	2	1	2	3.13	91.5535	7.1665
O75976	Carboxypeptidase D OS=Homo sapiens GN=CPD PE=1 SV=2 - [CBPD_HUMAN]	5	3	1	3	3.26	152.835	6.04932
Q4G0X9	Coiled-coil domain-containing protein 40 OS=Homo sapiens GN=CCDC40 PE=2 SV=2 - [CCD40_HUMAN]	5	2	1	2	2.71	130.033	5.2876
Q5T2E6	UPF0668 protein C10orf76 OS=Homo sapiens GN=C10orf76 PE=1 SV=1 - [CJ076_HUMAN]	5	2	1	2	7.69	78.6594	6.59521
Q8N4L2	Type 2 phosphatidylinositol 4,5-bisphosphate 4-phosphatase OS=Homo sapiens GN=TMEM55A PE=1 SV=1 - [TM55A_HUMAN]	5	3	2	3	15.18	28.0623	8.67529
P18621	60S ribosomal protein L17 OS=Homo sapiens GN=RPL17 PE=1 SV=3 - [RL17_HUMAN]	5	2	1	2	14.13	21.3833	10.1694
Q86YW9	Mediator of RNA polymerase II transcription subunit 12-like protein OS=Homo sapiens GN=MED12L PE=1 SV=2 - [MD12L_HUMAN]	5	3	1	3	2.33	239.967	7.76709
Q8WXX0	Dynein heavy chain 7, axonemal OS=Homo sapiens GN=DNAH7 PE=1 SV=2 - [DYH7_HUMAN]	5	4	1	3	2.16	460.862	5.99854
P10619	Lysosomal protective protein OS=Homo sapiens GN=CTSA PE=1 SV=2 - [PPGB_HUMAN]	5	3	1	3	7.08	54.4311	6.60986
Q9H6N6	Putative uncharacterized protein MYH16 OS=Homo sapiens GN=MYH16 PE=1 SV=2 - [MYH16_HUMAN]	5	3	1	3	3.37	128.211	5.49072
Q9ULV0	Unconventional myosin-Vb OS=Homo sapiens GN=MYO5B PE=1 SV=3 - [MYO5B_HUMAN]	5	2	1	2	1.84	213.538	7.1958
Q5T4S7	E3 ubiquitin-protein ligase UBR4 OS=Homo sapiens GN=UBR4 PE=1 SV=1 - [UBR4_HUMAN]	5	4	1	4	1.35	573.476	6.03662
Q96LI5	CCR4-NOT transcription complex subunit 6-like OS=Homo sapiens GN=CNOT6L PE=1 SV=2 - [CNO6L_HUMAN]	5	2	2	2	6.85	62.961	6.7417
P35555	Fibrillin-1 OS=Homo sapiens GN=FBN1 PE=1 SV=3 - [FBN1_HUMAN]	5	3	2	3	1.01	312.022	4.93213
Q7Z3T8	Zinc finger FYVE domain-containing protein 16 OS=Homo sapiens GN=ZFYVE16 PE=1 SV=3 - [ZFY16_HUMAN]	5	3	1	3	3.44	168.797	4.81787
Q8N1C3	Gamma-aminobutyric acid receptor subunit gamma-1 OS=Homo sapiens GN=GABRG1 PE=2 SV=2 - [GBRG1_HUMAN]	5	2	1	2	14.84	53.5603	8.1333
P35914	Hydroxymethylglutaryl-CoA lyase, mitochondrial OS=Homo sapiens GN=HMGCL PE=1 SV=2 - [HMGCL_HUMAN]	5	2	1	2	7.38	34.3378	8.54346
P11277	Spectrin beta chain, erythrocytic OS=Homo sapiens GN=SPTB PE=1 SV=5 - [SPTB1_HUMAN]	5	5	1	4	3.18	246.316	5.2749
Q8IXS2	Coiled-coil domain-containing protein 65 OS=Homo sapiens GN=CCDC65 PE=1 SV=2 - [CCD65_HUMAN]	5	2	1	2	7.23	57.2612	7.43018
P50579	Methionine aminopeptidase 2 OS=Homo sapiens GN=METAP2 PE=1 SV=1 - [MAP2_HUMAN]	5	2	1	2	7.32	52.8581	5.8208
O75962	Triple functional domain protein OS=Homo sapiens GN=TRIO PE=1 SV=2 - [TRIO_HUMAN]	5	3	1	2	1.74	346.683	6.3667
P33402	Guanylate cyclase soluble subunit alpha-2 OS=Homo sapiens GN=GUCY1A2 PE=2 SV=1 - [GCYA2_HUMAN]	5	3	1	3	7.1	81.6975	7.66455
Q8IVF5	T-lymphoma invasion and metastasis-inducing protein 2 OS=Homo sapiens GN=TIAM2 PE=2 SV=4 - [TIAM2_HUMAN]	5	2	2	2	1.29	189.985	7.21045
P16499	Rod cGMP-specific 3',5'-cyclic phosphodiesterase subunit alpha OS=Homo sapiens GN=PDE6A PE=1 SV=4 - [PDE6A_HUMAN]	5	2	2	2	3.14	99.4828	5.71924
P21741	Midkine OS=Homo sapiens GN=MDK PE=1 SV=1 - [MK_HUMAN]	5	3	1	3	13.99	15.575	9.78857
Q15075	Early endosome antigen 1 OS=Homo sapiens GN=EEA1 PE=1 SV=2 - [EEA1_HUMAN]	5	4	1	4	3.4	162.367	5.68115
Q9H9Y6	DNA-directed RNA polymerase I subunit RPA2 OS=Homo sapiens GN=POLR1B PE=1 SV=2 - [RPA2_HUMAN]	5	3	1	3	4.67	128.146	7.82568
P0C7U9	Protein FAM87A OS=Homo sapiens GN=FAM87A PE=2 SV=1 - [FA87A_HUMAN]	5	2	1	2	19.23	31.7185	10.0083
Q99973	Telomerase protein component 1 OS=Homo sapiens GN=TEP1 PE=1 SV=2 - [TEP1_HUMAN]	5	2	1	2	1.48	290.307	7.97217
P40429	60S ribosomal protein L13a OS=Homo sapiens GN=RPL13A PE=1 SV=2 - [RL13A_HUMAN]	5	3	3	3	12.81	23.5624	10.9312
P09341	Growth-regulated alpha protein OS=Homo sapiens GN=CXCL1 PE=1 SV=1 - [GROA_HUMAN]	5	3	1	3	23.36	11.2942	10.4331
Q7Z5H3	Rho GTPase-activating protein 22 OS=Homo sapiens GN=ARHGAP22 PE=1 SV=1 - [RHG22_HUMAN]	5	2	1	2	5.44	76.731	8.14795
Q8NAM6	Zinc finger and SCAN domain-containing protein 4 OS=Homo sapiens GN=ZSCAN4 PE=2 SV=1 - [ZSCA4_HUMAN]	5	2	1	2	11.55	48.9257	6.94678
P48552	Nuclear receptor-interacting protein 1 OS=Homo sapiens GN=NRIP1 PE=1 SV=2 - [NRIP1_HUMAN]	5	2	1	2	2.16	126.863	8.17725
P19237	Troponin I, slow skeletal muscle OS=Homo sapiens GN=TNNI1 PE=1 SV=3 - [TNNI1_HUMAN]	5	2	1	2	10.7	21.6786	9.5835
Q14324	Myosin-binding protein C, fast-type OS=Homo sapiens GN=MYBPC2 PE=1 SV=2 - [MYPC2_HUMAN]	5	2	1	2	1.84	127.991	7.51807
P11310	Medium-chain specific acyl-CoA dehydrogenase, mitochondrial OS=Homo sapiens GN=ACADM PE=1 SV=1 - [ACADM_HUMAN]	5	3	1	3	11.88	46.5586	8.36768
Q14571	Inositol 1,4,5-trisphosphate receptor type 2 OS=Homo sapiens GN=ITPR2 PE=1 SV=2 - [ITPR2_HUMAN]	5	2	1	2	2	307.867	6.43018
A4UGR9	Xin actin-binding repeat-containing protein 2 OS=Homo sapiens GN=XIRP2 PE=1 SV=2 - [XIRP2_HUMAN]	5	3	1	3	1.16	382.063	6.37939
Q7KZ85	Transcription elongation factor SPT6 OS=Homo sapiens GN=SUPT6H PE=1 SV=2 - [SPT6H_HUMAN]	5	2	1	2	1.27	198.949	4.90674
Q96CN9	GRIP and coiled-coil domain-containing protein 1 OS=Homo sapiens GN=GCC1 PE=1 SV=1 - [GCC1_HUMAN]	5	2	1	2	2.45	87.7573	5.45264
P49454	Centromere protein F OS=Homo sapiens GN=CENPF PE=1 SV=2 - [CENPF_HUMAN]	5	3	1	3	0.9	367.537	5.07178
Q9BZF9	Uveal autoantigen with coiled-coil domains and ankyrin repeats OS=Homo sapiens GN=UACA PE=1 SV=2 - [UACA_HUMAN]	5	2	1	2	2.26	162.404	7.03467
Q86UQ4	ATP-binding cassette sub-family A member 13 OS=Homo sapiens GN=ABCA13 PE=2 SV=3 - [ABCAD_HUMAN]	5	2	1	2	1.13	575.791	6.45557
Q9NRR5	Ubiquilin-4 OS=Homo sapiens GN=UBQLN4 PE=1 SV=2 - [UBQL4_HUMAN]	4	2	1	2	10.15	63.8124	5.22412
P20810	Calpastatin OS=Homo sapiens GN=CAST PE=1 SV=4 - [ICAL_HUMAN]	4	2	1	2	4.38	76.5263	5.07178
O43295	SLIT-ROBO Rho GTPase-activating protein 3 OS=Homo sapiens GN=SRGAP3 PE=1 SV=3 - [SRGP3_HUMAN]	4	3	1	3	5.28	124.425	6.68311
Q9Y4K1	Absent in melanoma 1 protein OS=Homo sapiens GN=AIM1 PE=1 SV=3 - [AIM1_HUMAN]	4	3	1	2	1.45	188.558	5.85889
Q49A92	Uncharacterized protein C8orf34 OS=Homo sapiens GN=C8orf34 PE=2 SV=2 - [CH034_HUMAN]	4	2	2	2	7.74	50.4582	5.04639
Q7Z3G6	Prickle-like protein 2 OS=Homo sapiens GN=PRICKLE2 PE=1 SV=2 - [PRIC2_HUMAN]	4	4	1	4	8.77	95.5534	7.35693
P00973	2'-5'-oligoadenylate synthase 1 OS=Homo sapiens GN=OAS1 PE=1 SV=4 - [OAS1_HUMAN]	4	2	1	2	6.5	45.9994	8.22119
O94964	Protein SOGA1 OS=Homo sapiens GN=SOGA1 PE=1 SV=2 - [SOGA1_HUMAN]	4	2	1	2	1.12	159.661	6.45557
P55145	Mesencephalic astrocyte-derived neurotrophic factor OS=Homo sapiens GN=MANF PE=1 SV=3 - [MANF_HUMAN]	4	2	1	2	15.93	20.6868	8.68994
Q15233	Non-POU domain-containing octamer-binding protein OS=Homo sapiens GN=NONO PE=1 SV=4 - [NONO_HUMAN]	4	2	1	2	7.86	54.1973	8.95361
Q9ULU8	Calcium-dependent secretion activator 1 OS=Homo sapiens GN=CADPS PE=1 SV=3 - [CAPS1_HUMAN]	4	3	1	3	2.73	152.69	5.70654
Q8TEQ0	Sorting nexin-29 OS=Homo sapiens GN=SNX29 PE=1 SV=3 - [SNX29_HUMAN]	4	2	2	2	2.46	91.1971	6.21436
P51572	B-cell receptor-associated protein 31 OS=Homo sapiens GN=BCAP31 PE=1 SV=3 - [BAP31_HUMAN]	4	3	1	3	13.41	27.974	8.44092
Q96QA5	Gasdermin-A OS=Homo sapiens GN=GSDMA PE=1 SV=4 - [GSDMA_HUMAN]	4	3	1	3	6.29	49.3338	5.2876
Q8NEA9	Putative germ cell-less protein-like 1-like OS=Homo sapiens GN=GMCL1P1 PE=1 SV=1 - [GMCLL_HUMAN]	4	3	2	2	8.17	60.1621	7.79639
P49189	4-trimethylaminobutyraldehyde dehydrogenase OS=Homo sapiens GN=ALDH9A1 PE=1 SV=3 - [AL9A1_HUMAN]	4	3	1	3	6.28	53.767	5.87158
P09488	Glutathione S-transferase Mu 1 OS=Homo sapiens GN=GSTM1 PE=1 SV=3 - [GSTM1_HUMAN]	4	2	3	2	13.76	25.6951	6.69775
Q5VU43	Myomegalin OS=Homo sapiens GN=PDE4DIP PE=1 SV=1 - [MYOME_HUMAN]	4	2	1	2	1.07	264.918	5.43994
Q9ULJ1	Outer dense fiber protein 2-like OS=Homo sapiens GN=ODF2L PE=2 SV=2 - [ODF2L_HUMAN]	4	2	1	2	4.72	73.6821	6.48096
Q8IUZ0	Leucine-rich repeat-containing protein 49 OS=Homo sapiens GN=LRRC49 PE=2 SV=2 - [LRC49_HUMAN]	4	2	1	2	3.5	78.845	7.86963
P29475	Nitric oxide synthase, brain OS=Homo sapiens GN=NOS1 PE=1 SV=2 - [NOS1_HUMAN]	4	2	1	2	2.93	160.869	7.41553
Q03169	Tumor necrosis factor alpha-induced protein 2 OS=Homo sapiens GN=TNFAIP2 PE=2 SV=2 - [TNAP2_HUMAN]	4	2	1	2	2.91	72.6161	6.45557
Q04446	1,4-alpha-glucan-branching enzyme OS=Homo sapiens GN=GBE1 PE=1 SV=3 - [GLGB_HUMAN]	4	3	1	3	5.84	80.4226	6.31592
Q6Q4G3	Aminopeptidase Q OS=Homo sapiens GN=LVRN PE=1 SV=4 - [AMPQ_HUMAN]	4	2	1	2	5.35	113.211	5.63037
O43681	ATPase ASNA1 OS=Homo sapiens GN=ASNA1 PE=1 SV=2 - [ASNA_HUMAN]	4	2	1	2	6.61	38.7674	4.90674
O60884	DnaJ homolog subfamily A member 2 OS=Homo sapiens GN=DNAJA2 PE=1 SV=1 - [DNJA2_HUMAN]	4	2	1	2	5.83	45.7166	6.48096
Q15942	Zyxin OS=Homo sapiens GN=ZYX PE=1 SV=1 - [ZYX_HUMAN]	4	2	1	2	3.67	61.2382	6.66846
Q2TAA2	Isoamyl acetate-hydrolyzing esterase 1 homolog OS=Homo sapiens GN=IAH1 PE=1 SV=1 - [IAH1_HUMAN]	4	2	1	2	10.89	27.581	5.30029
Q96AZ6	Interferon-stimulated gene 20 kDa protein OS=Homo sapiens GN=ISG20 PE=1 SV=2 - [ISG20_HUMAN]	4	2	1	2	14.92	20.3506	8.92432
Q9Y6K5	2'-5'-oligoadenylate synthase 3 OS=Homo sapiens GN=OAS3 PE=1 SV=3 - [OAS3_HUMAN]	4	4	1	4	4.6	121.093	8.39697
O43852	Calumenin OS=Homo sapiens GN=CALU PE=1 SV=2 - [CALU_HUMAN]	4	2	1	2	6.67	37.0835	4.64014
Q9Y2Q5	Ragulator complex protein LAMTOR2 OS=Homo sapiens GN=LAMTOR2 PE=1 SV=1 - [LTOR2_HUMAN]	4	2	1	2	16	13.4989	5.40186
Q16666	Gamma-interferon-inducible protein 16 OS=Homo sapiens GN=IFI16 PE=1 SV=3 - [IF16_HUMAN]	4	2	1	2	3.69	88.1994	9.27588
Q8NF50	Dedicator of cytokinesis protein 8 OS=Homo sapiens GN=DOCK8 PE=1 SV=3 - [DOCK8_HUMAN]	4	2	1	2	1.19	238.377	6.87354
Q9H2U2	Inorganic pyrophosphatase 2, mitochondrial OS=Homo sapiens GN=PPA2 PE=1 SV=2 - [IPYR2_HUMAN]	4	2	1	2	7.19	37.896	7.38623
P32455	Guanylate-binding protein 1 OS=Homo sapiens GN=GBP1 PE=1 SV=2 - [GBP1_HUMAN]	4	4	1	3	7.94	67.8877	6.31592
Q15904	V-type proton ATPase subunit S1 OS=Homo sapiens GN=ATP6AP1 PE=1 SV=2 - [VAS1_HUMAN]	4	3	2	3	4.89	51.9926	6.13818
P33261	Cytochrome P450 2C19 OS=Homo sapiens GN=CYP2C19 PE=1 SV=3 - [CP2CJ_HUMAN]	4	2	1	2	4.9	55.8949	7.38623
Q8TER0	Sushi, nidogen and EGF-like domain-containing protein 1 OS=Homo sapiens GN=SNED1 PE=2 SV=2 - [SNED1_HUMAN]	4	2	1	2	1.63	152.104	6.97607
P18077	60S ribosomal protein L35a OS=Homo sapiens GN=RPL35A PE=1 SV=2 - [RL35A_HUMAN]	4	2	1	2	14.55	12.5298	11.063
Q01130	Serine/arginine-rich splicing factor 2 OS=Homo sapiens GN=SRSF2 PE=1 SV=4 - [SRSF2_HUMAN]	4	2	2	2	8.6	25.4612	11.854
Q5H8C1	FRAS1-related extracellular matrix protein 1 OS=Homo sapiens GN=FREM1 PE=1 SV=3 - [FREM1_HUMAN]	4	2	1	2	1.01	244.001	5.89697
O60568	Procollagen-lysine,2-oxoglutarate 5-dioxygenase 3 OS=Homo sapiens GN=PLOD3 PE=1 SV=1 - [PLOD3_HUMAN]	4	2	1	2	6.1	84.7315	6.04932
Q92747	Actin-related protein 2/3 complex subunit 1A OS=Homo sapiens GN=ARPC1A PE=1 SV=2 - [ARC1A_HUMAN]	4	3	1	3	8.11	41.5427	8.17725
Q99963	Endophilin-A3 OS=Homo sapiens GN=SH3GL3 PE=1 SV=1 - [SH3G3_HUMAN]	4	2	1	2	9.51	39.26	5.37646
P09958	Furin OS=Homo sapiens GN=FURIN PE=1 SV=2 - [FURIN_HUMAN]	4	2	1	2	3.65	86.6237	6.46826
Q12789	General transcription factor 3C polypeptide 1 OS=Homo sapiens GN=GTF3C1 PE=1 SV=4 - [TF3C1_HUMAN]	4	2	1	2	1.8	238.725	7.29834
Q9BYW2	Histone-lysine N-methyltransferase SETD2 OS=Homo sapiens GN=SETD2 PE=1 SV=3 - [SETD2_HUMAN]	4	3	1	3	1.01	287.418	6.13818
Q5SZK8	FRAS1-related extracellular matrix protein 2 OS=Homo sapiens GN=FREM2 PE=1 SV=2 - [FREM2_HUMAN]	4	3	1	3	1.55	350.937	5.03369
O14981	TATA-binding protein-associated factor 172 OS=Homo sapiens GN=BTAF1 PE=1 SV=2 - [BTAF1_HUMAN]	4	2	1	2	1.03	206.756	6.52197
P57678	Gem-associated protein 4 OS=Homo sapiens GN=GEMIN4 PE=1 SV=2 - [GEMI4_HUMAN]	4	2	1	2	3.97	119.96	6.03662
Q53GQ0	Very-long-chain 3-oxoacyl-CoA reductase OS=Homo sapiens GN=HSD17B12 PE=1 SV=2 - [DHB12_HUMAN]	4	2	1	2	8.65	34.3022	9.31982
O15118	Niemann-Pick C1 protein OS=Homo sapiens GN=NPC1 PE=1 SV=2 - [NPC1_HUMAN]	4	3	1	3	3.05	142.074	5.36377
O95622	Adenylate cyclase type 5 OS=Homo sapiens GN=ADCY5 PE=1 SV=3 - [ADCY5_HUMAN]	4	2	2	2	2.78	138.818	7.23975
P35858	Insulin-like growth factor-binding protein complex acid labile subunit OS=Homo sapiens GN=IGFALS PE=1 SV=1 - [ALS_HUMAN]	4	2	1	2	5.12	65.9938	6.78564
Q96N67	Dedicator of cytokinesis protein 7 OS=Homo sapiens GN=DOCK7 PE=1 SV=4 - [DOCK7_HUMAN]	4	3	1	3	3.32	242.407	6.80029
Q8TDY3	Actin-related protein T2 OS=Homo sapiens GN=ACTRT2 PE=2 SV=2 - [ACTT2_HUMAN]	4	2	1	2	14.59	41.6752	5.46533
Q9H1H9	Kinesin-like protein KIF13A OS=Homo sapiens GN=KIF13A PE=1 SV=2 - [KI13A_HUMAN]	4	2	2	2	2.05	202.183	5.60498
Q9H583	HEAT repeat-containing protein 1 OS=Homo sapiens GN=HEATR1 PE=1 SV=3 - [HEAT1_HUMAN]	4	3	1	3	2.47	242.215	6.53662
P04209	Ig lambda chain V-II region NIG-84 OS=Homo sapiens PE=1 SV=1 - [LV211_HUMAN]	4	2	1	2	21.43	11.5736	7.12256
P78347	General transcription factor II-I OS=Homo sapiens GN=GTF2I PE=1 SV=2 - [GTF2I_HUMAN]	4	3	1	3	6.41	112.346	6.39209
Q9UNU6	7-alpha-hydroxycholest-4-en-3-one 12-alpha-hydroxylase OS=Homo sapiens GN=CYP8B1 PE=1 SV=2 - [CP8B1_HUMAN]	4	2	1	2	11.58	58.0307	8.66064
Q13356	Peptidyl-prolyl cis-trans isomerase-like 2 OS=Homo sapiens GN=PPIL2 PE=1 SV=1 - [PPIL2_HUMAN]	4	2	1	2	6.92	58.7866	8.77783
O60244	Mediator of RNA polymerase II transcription subunit 14 OS=Homo sapiens GN=MED14 PE=1 SV=2 - [MED14_HUMAN]	4	3	1	3	2.82	160.504	8.73389
Q8IWE2	Protein NOXP20 OS=Homo sapiens GN=FAM114A1 PE=1 SV=2 - [NXP20_HUMAN]	4	2	1	2	4.09	60.7041	4.67822
P12821	Angiotensin-converting enzyme OS=Homo sapiens GN=ACE PE=1 SV=1 - [ACE_HUMAN]	4	3	1	3	3.14	149.62	6.39209
Q9H173	Nucleotide exchange factor SIL1 OS=Homo sapiens GN=SIL1 PE=1 SV=1 - [SIL1_HUMAN]	4	2	1	2	4.34	52.052	5.36377
O75417	DNA polymerase theta OS=Homo sapiens GN=POLQ PE=1 SV=2 - [DPOLQ_HUMAN]	4	2	1	2	1.78	289.437	7.35693
Q6P2Q9	Pre-mRNA-processing-splicing factor 8 OS=Homo sapiens GN=PRPF8 PE=1 SV=2 - [PRP8_HUMAN]	4	2	1	2	1.8	273.427	8.83643
Q9H300	Presenilins-associated rhomboid-like protein, mitochondrial OS=Homo sapiens GN=PARL PE=1 SV=2 - [PARL_HUMAN]	4	2	1	2	12.14	42.1627	9.78857
P47985	Cytochrome b-c1 complex subunit Rieske, mitochondrial OS=Homo sapiens GN=UQCRFS1 PE=1 SV=2 - [UCRI_HUMAN]	4	2	2	2	10.22	29.6494	8.32373
O43795	Unconventional myosin-Ib OS=Homo sapiens GN=MYO1B PE=1 SV=3 - [MYO1B_HUMAN]	4	3	1	2	3.52	131.902	9.37842
P40189	Interleukin-6 receptor subunit beta OS=Homo sapiens GN=IL6ST PE=1 SV=2 - [IL6RB_HUMAN]	4	2	1	2	2.83	103.471	5.94775
Q13099	Intraflagellar transport protein 88 homolog OS=Homo sapiens GN=IFT88 PE=2 SV=2 - [IFT88_HUMAN]	4	2	1	2	9.36	94.2105	6.53662
Q9BY64	UDP-glucuronosyltransferase 2B28 OS=Homo sapiens GN=UGT2B28 PE=1 SV=1 - [UDB28_HUMAN]	4	2	2	2	9.83	60.8662	8.60205
Q96AV8	Transcription factor E2F7 OS=Homo sapiens GN=E2F7 PE=1 SV=3 - [E2F7_HUMAN]	4	3	1	3	6.92	99.8265	8.1626
O15439	Multidrug resistance-associated protein 4 OS=Homo sapiens GN=ABCC4 PE=1 SV=3 - [MRP4_HUMAN]	4	2	1	2	2.19	149.432	8.19189
E7ETH6	Zinc finger protein 587B OS=Homo sapiens GN=ZNF587B PE=1 SV=1 - [Z587B_HUMAN]	4	2	1	2	7.71	45.512	8.38232
Q8N9B8	Ras-GEF domain-containing family member 1A OS=Homo sapiens GN=RASGEF1A PE=2 SV=2 - [RGF1A_HUMAN]	4	2	1	2	3.33	54.5207	7.6792
P04278	Sex hormone-binding globulin OS=Homo sapiens GN=SHBG PE=1 SV=2 - [SHBG_HUMAN]	4	2	1	2	9.45	43.7518	6.7124
Q9NQC7	Ubiquitin carboxyl-terminal hydrolase CYLD OS=Homo sapiens GN=CYLD PE=1 SV=1 - [CYLD_HUMAN]	4	2	1	2	3.03	107.247	5.59229
Q9NSI6	Bromodomain and WD repeat-containing protein 1 OS=Homo sapiens GN=BRWD1 PE=1 SV=4 - [BRWD1_HUMAN]	4	3	1	2	0.95	262.772	8.45557
P09238	Stromelysin-2 OS=Homo sapiens GN=MMP10 PE=1 SV=1 - [MMP10_HUMAN]	4	2	1	2	5.04	54.1168	5.79541
P61353	60S ribosomal protein L27 OS=Homo sapiens GN=RPL27 PE=1 SV=2 - [RL27_HUMAN]	4	2	1	2	12.5	15.7877	10.5649
Q58F21	Bromodomain testis-specific protein OS=Homo sapiens GN=BRDT PE=1 SV=4 - [BRDT_HUMAN]	4	2	1	2	1.27	107.887	8.95361
Q9UK61	Protein TASOR OS=Homo sapiens GN=FAM208A PE=1 SV=3 - [TASOR_HUMAN]	4	3	1	3	1.74	188.914	5.79541
Q15262	Receptor-type tyrosine-protein phosphatase kappa OS=Homo sapiens GN=PTPRK PE=1 SV=2 - [PTPRK_HUMAN]	4	2	1	2	3.68	161.998	5.89697
O43516	WAS/WASL-interacting protein family member 1 OS=Homo sapiens GN=WIPF1 PE=1 SV=3 - [WIPF1_HUMAN]	4	2	1	2	12.92	51.2274	11.4731
A0A075B6S5	Immunoglobulin kappa variable 1-27 OS=Homo sapiens GN=IGKV1-27 PE=3 SV=1 - [KV127_HUMAN]	4	2	3	2	38.46	12.7034	8.29443
Q9NX02	NACHT, LRR and PYD domains-containing protein 2 OS=Homo sapiens GN=NLRP2 PE=1 SV=1 - [NALP2_HUMAN]	4	3	1	3	5.27	120.437	6.07471
O75970	Multiple PDZ domain protein OS=Homo sapiens GN=MPDZ PE=1 SV=2 - [MPDZ_HUMAN]	4	2	1	2	1.4	221.481	5.05908
Q13315	Serine-protein kinase ATM OS=Homo sapiens GN=ATM PE=1 SV=4 - [ATM_HUMAN]	4	2	1	2	2	350.462	6.81494
Q9NWF9	E3 ubiquitin-protein ligase RNF216 OS=Homo sapiens GN=RNF216 PE=1 SV=3 - [RN216_HUMAN]	4	3	4	2	5.43	99.3421	4.90674
O60716	Catenin delta-1 OS=Homo sapiens GN=CTNND1 PE=1 SV=1 - [CTND1_HUMAN]	4	2	1	2	2.27	108.103	6.22705
Q5SSG8	Mucin-21 OS=Homo sapiens GN=MUC21 PE=1 SV=2 - [MUC21_HUMAN]	4	2	1	2	3.71	54.1964	4.80518
Q9NVI7	ATPase family AAA domain-containing protein 3A OS=Homo sapiens GN=ATAD3A PE=1 SV=2 - [ATD3A_HUMAN]	4	2	2	2	2.84	71.3247	8.98291
P61619	Protein transport protein Sec61 subunit alpha isoform 1 OS=Homo sapiens GN=SEC61A1 PE=1 SV=2 - [S61A1_HUMAN]	4	3	2	3	9.03	52.2305	8.06006
Q9H444	Charged multivesicular body protein 4b OS=Homo sapiens GN=CHMP4B PE=1 SV=1 - [CHM4B_HUMAN]	4	3	2	3	12.95	24.9346	4.81787
Q4KMQ1	Taperin OS=Homo sapiens GN=TPRN PE=1 SV=2 - [TPRN_HUMAN]	4	2	1	2	3.66	75.5097	7.25439
Q9P260	LisH domain and HEAT repeat-containing protein KIAA1468 OS=Homo sapiens GN=KIAA1468 PE=1 SV=2 - [K1468_HUMAN]	4	4	1	4	8.14	134.545	5.45264
Q99715	Collagen alpha-1(XII) chain OS=Homo sapiens GN=COL12A1 PE=1 SV=2 - [COCA1_HUMAN]	4	2	1	2	1.27	332.941	5.52881
P56199	Integrin alpha-1 OS=Homo sapiens GN=ITGA1 PE=1 SV=2 - [ITA1_HUMAN]	4	2	1	2	1.19	130.765	6.29053
Q8IZX4	Transcription initiation factor TFIID subunit 1-like OS=Homo sapiens GN=TAF1L PE=1 SV=1 - [TAF1L_HUMAN]	4	4	2	3	2.96	207.171	5.40186
Q5JWR5	Protein dopey-1 OS=Homo sapiens GN=DOPEY1 PE=2 SV=1 - [DOP1_HUMAN]	4	2	1	2	2.19	277.179	6.29053
Q9UFH2	Dynein heavy chain 17, axonemal OS=Homo sapiens GN=DNAH17 PE=1 SV=2 - [DYH17_HUMAN]	4	3	1	2	0.74	511.46	5.77002
P02786	Transferrin receptor protein 1 OS=Homo sapiens GN=TFRC PE=1 SV=2 - [TFR1_HUMAN]	4	3	1	3	4.21	84.8179	6.60986
Q2M2E5	Uncharacterized protein C5orf64 OS=Homo sapiens GN=C5orf64 PE=2 SV=2 - [CE064_HUMAN]	4	2	1	2	19.23	14.8067	9.46631
Q9UJS0	Calcium-binding mitochondrial carrier protein Aralar2 OS=Homo sapiens GN=SLC25A13 PE=1 SV=2 - [CMC2_HUMAN]	4	4	1	3	15.56	74.1286	8.6167
Q08379	Golgin subfamily A member 2 OS=Homo sapiens GN=GOLGA2 PE=1 SV=3 - [GOGA2_HUMAN]	4	3	1	3	3.19	113.017	5.021
Q9Y2Q0	Phospholipid-transporting ATPase IA OS=Homo sapiens GN=ATP8A1 PE=1 SV=1 - [AT8A1_HUMAN]	4	2	1	2	1.55	131.285	6.84424
O94874	E3 UFM1-protein ligase 1 OS=Homo sapiens GN=UFL1 PE=1 SV=2 - [UFL1_HUMAN]	4	2	1	2	3.27	89.5398	6.78564
Q8N436	Inactive carboxypeptidase-like protein X2 OS=Homo sapiens GN=CPXM2 PE=2 SV=3 - [CPXM2_HUMAN]	4	3	1	3	9.26	85.8159	6.87354
Q8WXG6	MAP kinase-activating death domain protein OS=Homo sapiens GN=MADD PE=1 SV=2 - [MADD_HUMAN]	4	3	1	3	3.04	183.188	6.03662
A3KMH1	von Willebrand factor A domain-containing protein 8 OS=Homo sapiens GN=VWA8 PE=1 SV=2 - [VWA8_HUMAN]	4	2	1	2	1.26	214.689	7.40088
Q16623	Syntaxin-1A OS=Homo sapiens GN=STX1A PE=1 SV=1 - [STX1A_HUMAN]	4	2	3	2	10.07	33.0027	5.23682
Q03938	Zinc finger protein 90 OS=Homo sapiens GN=ZNF90 PE=2 SV=3 - [ZNF90_HUMAN]	4	2	1	2	6.32	69.0128	9.21729
Q96KA5	Cleft lip and palate transmembrane protein 1-like protein OS=Homo sapiens GN=CLPTM1L PE=1 SV=1 - [CLP1L_HUMAN]	4	2	1	2	13.75	62.189	8.55811
P22897	Macrophage mannose receptor 1 OS=Homo sapiens GN=MRC1 PE=1 SV=1 - [MRC1_HUMAN]	4	2	1	2	1.37	165.905	6.53662
P42858	Huntingtin OS=Homo sapiens GN=HTT PE=1 SV=2 - [HD_HUMAN]	4	2	1	2	1.46	347.383	6.20166
Q14789	Golgin subfamily B member 1 OS=Homo sapiens GN=GOLGB1 PE=1 SV=2 - [GOGB1_HUMAN]	4	3	1	3	1.6	375.79	4.99561
Q9Y2D5	A-kinase anchor protein 2 OS=Homo sapiens GN=AKAP2 PE=1 SV=3 - [AKAP2_HUMAN]	4	2	1	2	4.77	94.6028	5.10986
B1AJZ9	Forkhead-associated domain-containing protein 1 OS=Homo sapiens GN=FHAD1 PE=2 SV=2 - [FHAD1_HUMAN]	3	2	1	2	1.98	161.804	6.94678
Q6PIF6	Unconventional myosin-VIIb OS=Homo sapiens GN=MYO7B PE=1 SV=2 - [MYO7B_HUMAN]	3	2	1	2	1.47	241.445	8.57275
P18054	Arachidonate 12-lipoxygenase, 12S-type OS=Homo sapiens GN=ALOX12 PE=1 SV=4 - [LOX12_HUMAN]	3	3	1	3	6.79	75.6453	6.21436
Q8IU60	m7GpppN-mRNA hydrolase OS=Homo sapiens GN=DCP2 PE=1 SV=2 - [DCP2_HUMAN]	3	2	1	2	6.9	48.4263	8.00146
Q8TDG4	Helicase POLQ-like OS=Homo sapiens GN=HELQ PE=1 SV=2 - [HELQ_HUMAN]	3	2	1	2	4	124.053	6.58057
Q9NQ86	E3 ubiquitin-protein ligase TRIM36 OS=Homo sapiens GN=TRIM36 PE=1 SV=2 - [TRI36_HUMAN]	3	2	1	2	3.16	82.9599	6.11279
Q7Z5L0	Vitelline membrane outer layer protein 1 homolog OS=Homo sapiens GN=VMO1 PE=1 SV=1 - [VMO1_HUMAN]	3	2	1	2	11.39	21.5203	5.07178
Q9UL25	Ras-related protein Rab-21 OS=Homo sapiens GN=RAB21 PE=1 SV=3 - [RAB21_HUMAN]	3	2	1	2	8.44	24.3323	7.94287
Q9NRC6	Spectrin beta chain, non-erythrocytic 5 OS=Homo sapiens GN=SPTBN5 PE=1 SV=2 - [SPTN5_HUMAN]	3	3	4	3	0.73	416.493	6.65381
P15248	Interleukin-9 OS=Homo sapiens GN=IL9 PE=2 SV=1 - [IL9_HUMAN]	3	2	1	2	13.19	15.8979	8.54346
Q15027	Arf-GAP with coiled-coil, ANK repeat and PH domain-containing protein 1 OS=Homo sapiens GN=ACAP1 PE=1 SV=1 - [ACAP1_HUMAN]	3	3	1	2	5	81.4848	7.66455
A6NGW2	Putative stereocilin-like protein OS=Homo sapiens GN=STRCP1 PE=5 SV=1 - [STRCL_HUMAN]	3	2	2	2	0.96	192.314	5.40186
Q8NDA2	Hemicentin-2 OS=Homo sapiens GN=HMCN2 PE=2 SV=3 - [HMCN2_HUMAN]	3	2	1	2	1.52	541.639	5.87158
A0JNW5	UHRF1-binding protein 1-like OS=Homo sapiens GN=UHRF1BP1L PE=1 SV=2 - [UH1BL_HUMAN]	3	2	1	2	4.23	164.095	6.31592
Q8N2H3	Pyridine nucleotide-disulfide oxidoreductase domain-containing protein 2 OS=Homo sapiens GN=PYROXD2 PE=1 SV=2 - [PYRD2_HUMAN]	3	2	1	2	9.64	63.0272	6.94678
Q9H2G2	STE20-like serine/threonine-protein kinase OS=Homo sapiens GN=SLK PE=1 SV=1 - [SLK_HUMAN]	3	2	1	2	2.67	142.607	5.14795
Q03112	MDS1 and EVI1 complex locus protein EVI1 OS=Homo sapiens GN=MECOM PE=1 SV=2 - [EVI1_HUMAN]	3	2	1	2	5.14	118.201	6.7417
Q9Y4D2	Sn1-specific diacylglycerol lipase alpha OS=Homo sapiens GN=DAGLA PE=1 SV=3 - [DGLA_HUMAN]	3	2	1	2	4.32	114.879	6.354
Q9HCU9	Breast cancer metastasis-suppressor 1 OS=Homo sapiens GN=BRMS1 PE=1 SV=1 - [BRMS1_HUMAN]	3	2	1	2	8.13	28.443	4.7417
O00159	Unconventional myosin-Ic OS=Homo sapiens GN=MYO1C PE=1 SV=4 - [MYO1C_HUMAN]	3	3	1	3	3.48	121.606	9.40771
Q9HB71	Calcyclin-binding protein OS=Homo sapiens GN=CACYBP PE=1 SV=2 - [CYBP_HUMAN]	3	3	1	3	15.35	26.1936	8.25049
O14791	Apolipoprotein L1 OS=Homo sapiens GN=APOL1 PE=1 SV=5 - [APOL1_HUMAN]	3	3	2	2	9.05	43.9469	5.80811
P50748	Kinetochore-associated protein 1 OS=Homo sapiens GN=KNTC1 PE=1 SV=1 - [KNTC1_HUMAN]	3	2	1	2	1.36	250.588	5.97314
Q92794	Histone acetyltransferase KAT6A OS=Homo sapiens GN=KAT6A PE=1 SV=2 - [KAT6A_HUMAN]	3	3	1	3	2.15	224.886	5.68115
Q9Y6V0	Protein piccolo OS=Homo sapiens GN=PCLO PE=1 SV=4 - [PCLO_HUMAN]	3	3	1	3	1.01	552.937	6.50732
Q96PQ0	VPS10 domain-containing receptor SorCS2 OS=Homo sapiens GN=SORCS2 PE=1 SV=3 - [SORC2_HUMAN]	3	2	1	2	4.66	128.071	7.07861
Q96KN7	X-linked retinitis pigmentosa GTPase regulator-interacting protein 1 OS=Homo sapiens GN=RPGRIP1 PE=1 SV=2 - [RPGR1_HUMAN]	3	2	1	2	3.27	146.59	5.68115
P46821	Microtubule-associated protein 1B OS=Homo sapiens GN=MAP1B PE=1 SV=2 - [MAP1B_HUMAN]	3	2	1	2	1.46	270.468	4.80518
Q96JQ0	Protocadherin-16 OS=Homo sapiens GN=DCHS1 PE=1 SV=1 - [PCD16_HUMAN]	3	2	1	2	1.64	345.971	4.94482
Q96K12	Fatty acyl-CoA reductase 2 OS=Homo sapiens GN=FAR2 PE=2 SV=1 - [FACR2_HUMAN]	3	2	1	2	6.41	59.4001	9.37842
P21964	Catechol O-methyltransferase OS=Homo sapiens GN=COMT PE=1 SV=2 - [COMT_HUMAN]	3	3	1	3	11.07	30.0176	5.46533
P30038	Delta-1-pyrroline-5-carboxylate dehydrogenase, mitochondrial OS=Homo sapiens GN=ALDH4A1 PE=1 SV=3 - [AL4A1_HUMAN]	3	3	1	3	7.1	61.6806	8.07471
O60763	General vesicular transport factor p115 OS=Homo sapiens GN=USO1 PE=1 SV=2 - [USO1_HUMAN]	3	3	1	3	2.91	107.828	4.90674
Q9Y3U8	60S ribosomal protein L36 OS=Homo sapiens GN=RPL36 PE=1 SV=3 - [RL36_HUMAN]	3	2	1	2	20	12.2459	11.5903
P62191	26S protease regulatory subunit 4 OS=Homo sapiens GN=PSMC1 PE=1 SV=1 - [PRS4_HUMAN]	3	2	1	2	6.14	49.1537	6.21436
Q969T9	WW domain-binding protein 2 OS=Homo sapiens GN=WBP2 PE=1 SV=1 - [WBP2_HUMAN]	3	2	1	2	7.66	28.0684	5.90967
P78344	Eukaryotic translation initiation factor 4 gamma 2 OS=Homo sapiens GN=EIF4G2 PE=1 SV=1 - [IF4G2_HUMAN]	3	3	1	3	3.86	102.297	7.13721
P78524	Suppression of tumorigenicity 5 protein OS=Homo sapiens GN=ST5 PE=1 SV=3 - [ST5_HUMAN]	3	2	1	2	0.88	126.405	9.24658
Q9BX84	Transient receptor potential cation channel subfamily M member 6 OS=Homo sapiens GN=TRPM6 PE=1 SV=2 - [TRPM6_HUMAN]	3	2	1	2	2.42	231.56	7.76709
P07738	Bisphosphoglycerate mutase OS=Homo sapiens GN=BPGM PE=1 SV=2 - [PMGE_HUMAN]	3	2	1	2	6.95	29.9865	6.53662
P11908	Ribose-phosphate pyrophosphokinase 2 OS=Homo sapiens GN=PRPS2 PE=1 SV=2 - [PRPS2_HUMAN]	3	2	3	2	5.97	34.747	6.60986
Q96PH1	NADPH oxidase 5 OS=Homo sapiens GN=NOX5 PE=1 SV=1 - [NOX5_HUMAN]	3	2	1	2	3.66	86.3833	8.5874
Q9H190	Syntenin-2 OS=Homo sapiens GN=SDCBP2 PE=1 SV=2 - [SDCB2_HUMAN]	3	2	1	2	6.85	31.5738	9.0708
P67812	Signal peptidase complex catalytic subunit SEC11A OS=Homo sapiens GN=SEC11A PE=1 SV=1 - [SC11A_HUMAN]	3	2	1	2	11.73	20.6121	9.48096
Q9NRM2	Zinc finger protein 277 OS=Homo sapiens GN=ZNF277 PE=1 SV=2 - [ZN277_HUMAN]	3	2	1	2	4.22	52.754	5.33838
Q8WVV4	Protein POF1B OS=Homo sapiens GN=POF1B PE=1 SV=3 - [POF1B_HUMAN]	3	2	1	2	6.11	68.0224	6.31592
O14638	Ectonucleotide pyrophosphatase/phosphodiesterase family member 3 OS=Homo sapiens GN=ENPP3 PE=1 SV=2 - [ENPP3_HUMAN]	3	2	1	2	2.97	100.059	6.56592
O14933	Ubiquitin/ISG15-conjugating enzyme E2 L6 OS=Homo sapiens GN=UBE2L6 PE=1 SV=4 - [UB2L6_HUMAN]	3	2	1	2	21.57	17.7572	7.88428
Q8N1G2	Cap-specific mRNA (nucleoside-2'-O-)-methyltransferase 1 OS=Homo sapiens GN=CMTR1 PE=1 SV=1 - [CMTR1_HUMAN]	3	2	1	2	4.79	95.26	7.04932
Q8TDB6	E3 ubiquitin-protein ligase DTX3L OS=Homo sapiens GN=DTX3L PE=1 SV=1 - [DTX3L_HUMAN]	3	2	1	2	3.92	83.5013	8.06006
Q9NQR4	Omega-amidase NIT2 OS=Homo sapiens GN=NIT2 PE=1 SV=1 - [NIT2_HUMAN]	3	2	1	2	13.04	30.5886	7.21045
P31948	Stress-induced-phosphoprotein 1 OS=Homo sapiens GN=STIP1 PE=1 SV=1 - [STIP1_HUMAN]	3	2	1	2	4.05	62.5994	6.80029
Q14919	Dr1-associated corepressor OS=Homo sapiens GN=DRAP1 PE=1 SV=3 - [NC2A_HUMAN]	3	2	1	2	26.34	22.3359	5.17334
O15055	Period circadian protein homolog 2 OS=Homo sapiens GN=PER2 PE=1 SV=2 - [PER2_HUMAN]	3	2	1	2	3.9	136.493	6.46826
O60603	Toll-like receptor 2 OS=Homo sapiens GN=TLR2 PE=1 SV=1 - [TLR2_HUMAN]	3	3	1	3	6.25	89.7801	6.60986
Q86UT6	NLR family member X1 OS=Homo sapiens GN=NLRX1 PE=1 SV=1 - [NLRX1_HUMAN]	3	2	1	2	1.85	107.548	7.37158
Q8NBX0	Saccharopine dehydrogenase-like oxidoreductase OS=Homo sapiens GN=SCCPDH PE=1 SV=1 - [SCPDL_HUMAN]	3	2	1	2	9.79	47.1215	9.14404
O60308	Centrosomal protein of 104 kDa OS=Homo sapiens GN=CEP104 PE=1 SV=1 - [CE104_HUMAN]	3	2	1	2	2.59	104.381	7.62061
Q9Y5K8	V-type proton ATPase subunit D OS=Homo sapiens GN=ATP6V1D PE=1 SV=1 - [VATD_HUMAN]	3	2	1	2	5.67	28.2453	9.36377
Q5SVZ6	Zinc finger MYM-type protein 1 OS=Homo sapiens GN=ZMYM1 PE=1 SV=1 - [ZMYM1_HUMAN]	3	2	1	2	2.45	128.633	7.44482
Q6UWM7	Lactase-like protein OS=Homo sapiens GN=LCTL PE=1 SV=2 - [LCTL_HUMAN]	3	2	1	2	2.29	65.0467	8.01611
Q70Z35	Phosphatidylinositol 3,4,5-trisphosphate-dependent Rac exchanger 2 protein OS=Homo sapiens GN=PREX2 PE=2 SV=1 - [PREX2_HUMAN]	3	2	1	2	2.99	182.505	7.44482
Q8NA31	Telomere repeats-binding bouquet formation protein 1 OS=Homo sapiens GN=CCDC79 PE=2 SV=3 - [TERB1_HUMAN]	3	2	1	2	3.58	83.0105	7.45947
Q93100	Phosphorylase b kinase regulatory subunit beta OS=Homo sapiens GN=PHKB PE=1 SV=3 - [KPBB_HUMAN]	3	3	1	3	5.49	124.805	6.94678
Q9Y265	RuvB-like 1 OS=Homo sapiens GN=RUVBL1 PE=1 SV=1 - [RUVB1_HUMAN]	3	2	1	2	5.48	50.1963	6.41748
O94979	Protein transport protein Sec31A OS=Homo sapiens GN=SEC31A PE=1 SV=3 - [SC31A_HUMAN]	3	2	1	2	1.31	132.931	6.88818
Q92643	GPI-anchor transamidase OS=Homo sapiens GN=PIGK PE=1 SV=2 - [GPI8_HUMAN]	3	2	1	2	11.39	45.2227	6.16357
P54136	Arginine--tRNA ligase, cytoplasmic OS=Homo sapiens GN=RARS PE=1 SV=2 - [SYRC_HUMAN]	3	2	1	2	4.24	75.3309	6.68311
Q8TEQ8	GPI ethanolamine phosphate transferase 3 OS=Homo sapiens GN=PIGO PE=1 SV=3 - [PIGO_HUMAN]	3	3	1	3	4.5	118.623	8.11865
Q9ULD0	2-oxoglutarate dehydrogenase-like, mitochondrial OS=Homo sapiens GN=OGDHL PE=1 SV=3 - [OGDHL_HUMAN]	3	2	2	2	1.58	114.409	6.65381
P29218	Inositol monophosphatase 1 OS=Homo sapiens GN=IMPA1 PE=1 SV=1 - [IMPA1_HUMAN]	3	2	1	2	6.5	30.1692	5.26221
Q9Y4D1	Disheveled-associated activator of morphogenesis 1 OS=Homo sapiens GN=DAAM1 PE=1 SV=2 - [DAAM1_HUMAN]	3	2	1	2	3.8	123.396	7.2251
Q15418	Ribosomal protein S6 kinase alpha-1 OS=Homo sapiens GN=RPS6KA1 PE=1 SV=2 - [KS6A1_HUMAN]	3	3	1	2	5.17	82.6708	7.82568
Q96P64	Arf-GAP with GTPase, ANK repeat and PH domain-containing protein 4 OS=Homo sapiens GN=AGAP4 PE=2 SV=2 - [AGAP4_HUMAN]	3	2	4	2	9.5	73.0231	7.34229
P42677	40S ribosomal protein S27 OS=Homo sapiens GN=RPS27 PE=1 SV=3 - [RS27_HUMAN]	3	2	2	2	25	9.45484	9.45166
P07332	Tyrosine-protein kinase Fes/Fps OS=Homo sapiens GN=FES PE=1 SV=3 - [FES_HUMAN]	3	2	1	2	2.43	93.4382	6.72705
O14578	Citron Rho-interacting kinase OS=Homo sapiens GN=CIT PE=1 SV=2 - [CTRO_HUMAN]	3	3	1	2	3.55	231.286	6.56592
P33176	Kinesin-1 heavy chain OS=Homo sapiens GN=KIF5B PE=1 SV=1 - [KINH_HUMAN]	3	3	1	3	4.98	109.617	6.50732
Q9ULJ7	Ankyrin repeat domain-containing protein 50 OS=Homo sapiens GN=ANKRD50 PE=1 SV=4 - [ANR50_HUMAN]	3	2	1	2	2.73	155.761	6.59521
Q7Z408	CUB and sushi domain-containing protein 2 OS=Homo sapiens GN=CSMD2 PE=1 SV=2 - [CSMD2_HUMAN]	3	3	1	3	2.24	379.796	6.0874
P20839	Inosine-5'-monophosphate dehydrogenase 1 OS=Homo sapiens GN=IMPDH1 PE=1 SV=2 - [IMDH1_HUMAN]	3	2	1	2	5.84	55.3705	6.90283
P39900	Macrophage metalloelastase OS=Homo sapiens GN=MMP12 PE=1 SV=1 - [MMP12_HUMAN]	3	2	1	2	4.68	53.9671	8.66064
Q658Y4	Protein FAM91A1 OS=Homo sapiens GN=FAM91A1 PE=1 SV=3 - [F91A1_HUMAN]	3	2	1	2	2.15	93.8497	6.39209
A6H8Y1	Transcription factor TFIIIB component B'' homolog OS=Homo sapiens GN=BDP1 PE=1 SV=3 - [BDP1_HUMAN]	3	3	1	3	1.22	293.705	5.10986
Q969H0	F-box/WD repeat-containing protein 7 OS=Homo sapiens GN=FBXW7 PE=1 SV=1 - [FBXW7_HUMAN]	3	2	1	2	6.36	79.6133	5.79541
O75116	Rho-associated protein kinase 2 OS=Homo sapiens GN=ROCK2 PE=1 SV=4 - [ROCK2_HUMAN]	3	2	1	2	2.67	160.799	6.02393
P62316	Small nuclear ribonucleoprotein Sm D2 OS=Homo sapiens GN=SNRPD2 PE=1 SV=1 - [SMD2_HUMAN]	3	2	1	2	15.25	13.5182	9.90576
Q00444	Homeobox protein Hox-C5 OS=Homo sapiens GN=HOXC5 PE=3 SV=1 - [HXC5_HUMAN]	3	2	13	2	10.81	24.9603	9.5249
Q9Y5H1	Protocadherin gamma-A2 OS=Homo sapiens GN=PCDHGA2 PE=2 SV=1 - [PCDG2_HUMAN]	3	2	1	2	3.43	101.422	5.0083
Q15003	Condensin complex subunit 2 OS=Homo sapiens GN=NCAPH PE=1 SV=3 - [CND2_HUMAN]	3	2	1	2	2.43	82.5113	5.05908
O15389	Sialic acid-binding Ig-like lectin 5 OS=Homo sapiens GN=SIGLEC5 PE=1 SV=1 - [SIGL5_HUMAN]	3	2	2	2	7.8	60.6767	7.26904
P16219	Short-chain specific acyl-CoA dehydrogenase, mitochondrial OS=Homo sapiens GN=ACADS PE=1 SV=1 - [ACADS_HUMAN]	3	2	1	2	9.22	44.2688	7.98682
Q70CQ2	Ubiquitin carboxyl-terminal hydrolase 34 OS=Homo sapiens GN=USP34 PE=1 SV=2 - [UBP34_HUMAN]	3	2	1	2	0.68	403.973	5.8208
Q9UKE5	TRAF2 and NCK-interacting protein kinase OS=Homo sapiens GN=TNIK PE=1 SV=1 - [TNIK_HUMAN]	3	2	1	2	2.5	154.848	7.1665
Q659A1	Little elongation complex subunit 2 OS=Homo sapiens GN=ICE2 PE=1 SV=2 - [ICE2_HUMAN]	3	2	1	2	3.46	109.942	7.09326
Q14118	Dystroglycan OS=Homo sapiens GN=DAG1 PE=1 SV=2 - [DAG1_HUMAN]	3	2	1	2	4.13	97.3807	8.55811
Q8IYY4	Zinc finger protein DZIP1L OS=Homo sapiens GN=DZIP1L PE=1 SV=2 - [DZI1L_HUMAN]	3	2	1	2	2.87	86.7946	7.28369
Q9HAU5	Regulator of nonsense transcripts 2 OS=Homo sapiens GN=UPF2 PE=1 SV=1 - [RENT2_HUMAN]	3	3	1	2	3.77	147.717	5.69385
Q9NYQ8	Protocadherin Fat 2 OS=Homo sapiens GN=FAT2 PE=1 SV=2 - [FAT2_HUMAN]	3	2	1	2	0.78	479.018	5.16064
Q9H013	Disintegrin and metalloproteinase domain-containing protein 19 OS=Homo sapiens GN=ADAM19 PE=1 SV=3 - [ADA19_HUMAN]	3	2	1	2	2.72	104.928	8.35303
Q14590	Zinc finger protein 235 OS=Homo sapiens GN=ZNF235 PE=2 SV=3 - [ZN235_HUMAN]	3	2	1	2	6.91	83.9232	8.55811
Q5VV41	Rho guanine nucleotide exchange factor 16 OS=Homo sapiens GN=ARHGEF16 PE=1 SV=1 - [ARHGG_HUMAN]	3	2	1	2	5.5	80.0552	7.35693
Q14966	Zinc finger protein 638 OS=Homo sapiens GN=ZNF638 PE=1 SV=2 - [ZN638_HUMAN]	3	2	1	2	0.76	220.488	6.37939
Q6ZMV5	Putative SMEK homolog 3 OS=Homo sapiens GN=PPP4R3CP PE=5 SV=2 - [SMEK3_HUMAN]	3	2	1	2	7.45	95.7145	4.81787
Q8IWJ2	GRIP and coiled-coil domain-containing protein 2 OS=Homo sapiens GN=GCC2 PE=1 SV=4 - [GCC2_HUMAN]	3	3	1	3	3.56	195.789	5.13525
Q9Y5X1	Sorting nexin-9 OS=Homo sapiens GN=SNX9 PE=1 SV=1 - [SNX9_HUMAN]	3	2	1	2	7.56	66.5496	5.57959
Q5JTH9	RRP12-like protein OS=Homo sapiens GN=RRP12 PE=1 SV=2 - [RRP12_HUMAN]	3	2	1	2	2.85	143.611	8.74854
Q93034	Cullin-5 OS=Homo sapiens GN=CUL5 PE=1 SV=4 - [CUL5_HUMAN]	3	2	1	2	2.18	90.8974	7.94287
Q96PD5	N-acetylmuramoyl-L-alanine amidase OS=Homo sapiens GN=PGLYRP2 PE=1 SV=1 - [PGRP2_HUMAN]	3	2	1	2	6.6	62.1779	7.54736
Q4G0P3	Hydrocephalus-inducing protein homolog OS=Homo sapiens GN=HYDIN PE=1 SV=3 - [HYDIN_HUMAN]	3	3	1	3	0.78	575.528	6.06201
Q96M86	Dynein heavy chain domain-containing protein 1 OS=Homo sapiens GN=DNHD1 PE=2 SV=2 - [DNHD1_HUMAN]	3	2	1	2	0.74	533.305	6.7124
O00763	Acetyl-CoA carboxylase 2 OS=Homo sapiens GN=ACACB PE=1 SV=3 - [ACACB_HUMAN]	3	3	1	3	3.3	276.365	6.49365
Q9C0D4	Zinc finger protein 518B OS=Homo sapiens GN=ZNF518B PE=2 SV=2 - [Z518B_HUMAN]	3	2	1	2	3.17	119.456	9.45166
Q8NHP6	Motile sperm domain-containing protein 2 OS=Homo sapiens GN=MOSPD2 PE=1 SV=1 - [MSPD2_HUMAN]	3	2	1	2	2.9	59.7084	5.96045
Q9UQR1	Zinc finger protein 148 OS=Homo sapiens GN=ZNF148 PE=1 SV=2 - [ZN148_HUMAN]	3	2	1	2	6.17	88.9206	6.48096
P07942	Laminin subunit beta-1 OS=Homo sapiens GN=LAMB1 PE=1 SV=2 - [LAMB1_HUMAN]	3	2	1	2	2.58	197.909	4.94482
Q16773	Kynurenine--oxoglutarate transaminase 1 OS=Homo sapiens GN=KYAT1 PE=1 SV=1 - [KAT1_HUMAN]	3	2	1	2	13.03	47.8441	6.46826
Q8IZU2	WD repeat-containing protein 17 OS=Homo sapiens GN=WDR17 PE=2 SV=2 - [WDR17_HUMAN]	3	2	1	2	1.97	147.608	6.45557
Q8TD57	Dynein heavy chain 3, axonemal OS=Homo sapiens GN=DNAH3 PE=2 SV=1 - [DYH3_HUMAN]	3	3	1	2	0.85	470.468	6.43018
Q9HCD6	Protein TANC2 OS=Homo sapiens GN=TANC2 PE=1 SV=3 - [TANC2_HUMAN]	3	2	1	2	1.31	219.512	8.07471
P46734	Dual specificity mitogen-activated protein kinase kinase 3 OS=Homo sapiens GN=MAP2K3 PE=1 SV=2 - [MP2K3_HUMAN]	3	2	2	2	5.48	39.2929	7.43018
Q8N9W4	Golgin subfamily A member 6-like protein 2 OS=Homo sapiens GN=GOLGA6L2 PE=1 SV=2 - [GG6L2_HUMAN]	3	3	1	2	6.46	79.2929	5.5415
Q9C0D3	Protein zyg-11 homolog B OS=Homo sapiens GN=ZYG11B PE=1 SV=2 - [ZY11B_HUMAN]	3	3	1	3	4.57	83.8672	6.85889
Q8N2W9	E3 SUMO-protein ligase PIAS4 OS=Homo sapiens GN=PIAS4 PE=1 SV=1 - [PIAS4_HUMAN]	3	2	1	2	9.22	56.4677	6.13818
P35573	Glycogen debranching enzyme OS=Homo sapiens GN=AGL PE=1 SV=3 - [GDE_HUMAN]	3	2	1	2	3.2	174.652	6.75635
O15228	Dihydroxyacetone phosphate acyltransferase OS=Homo sapiens GN=GNPAT PE=1 SV=1 - [GNPAT_HUMAN]	3	2	1	2	6.32	77.138	6.56592
P09237	Matrilysin OS=Homo sapiens GN=MMP7 PE=1 SV=1 - [MMP7_HUMAN]	3	2	1	2	6.74	29.6579	7.91357
Q86Y13	E3 ubiquitin-protein ligase DZIP3 OS=Homo sapiens GN=DZIP3 PE=1 SV=2 - [DZIP3_HUMAN]	3	2	1	2	1.99	138.516	6.87354
Q8TCU6	Phosphatidylinositol 3,4,5-trisphosphate-dependent Rac exchanger 1 protein OS=Homo sapiens GN=PREX1 PE=1 SV=3 - [PREX1_HUMAN]	3	3	1	2	1.81	186.085	6.44287
P04233	HLA class II histocompatibility antigen gamma chain OS=Homo sapiens GN=CD74 PE=1 SV=3 - [HG2A_HUMAN]	3	3	1	3	10.81	33.4937	8.44092
Q9NQX4	Unconventional myosin-Vc OS=Homo sapiens GN=MYO5C PE=1 SV=2 - [MYO5C_HUMAN]	3	2	1	2	1.78	202.682	7.7085
O75691	Small subunit processome component 20 homolog OS=Homo sapiens GN=UTP20 PE=1 SV=3 - [UTP20_HUMAN]	3	2	1	2	0.93	318.182	7.38623
Q8NE28	Serine/threonine kinase-like domain-containing protein STKLD1 OS=Homo sapiens GN=STKLD1 PE=2 SV=4 - [STKL1_HUMAN]	3	2	1	2	5.59	75.627	5.36377
Q06190	Serine/threonine-protein phosphatase 2A regulatory subunit B'' subunit alpha OS=Homo sapiens GN=PPP2R3A PE=1 SV=1 - [P2R3A_HUMAN]	3	2	1	2	5.48	130.195	5.21143
Q6ZRK6	Coiled-coil domain-containing protein 73 OS=Homo sapiens GN=CCDC73 PE=2 SV=2 - [CCD73_HUMAN]	3	2	1	2	2.78	124.077	5.57959
O75306	NADH dehydrogenase [ubiquinone] iron-sulfur protein 2, mitochondrial OS=Homo sapiens GN=NDUFS2 PE=1 SV=2 - [NDUS2_HUMAN]	3	2	1	2	4.32	52.5117	7.54736
P0CF97	Protein FAM200B OS=Homo sapiens GN=FAM200B PE=3 SV=1 - [F200B_HUMAN]	3	2	1	2	5.94	75.9854	8.07471
Q92973	Transportin-1 OS=Homo sapiens GN=TNPO1 PE=1 SV=2 - [TNPO1_HUMAN]	3	2	1	2	2.34	102.289	4.98291
Q96BY6	Dedicator of cytokinesis protein 10 OS=Homo sapiens GN=DOCK10 PE=1 SV=3 - [DOC10_HUMAN]	3	2	1	2	1.28	249.373	7.13721
P15289	Arylsulfatase A OS=Homo sapiens GN=ARSA PE=1 SV=3 - [ARSA_HUMAN]	3	2	1	2	5.92	53.5537	6.07471
Q13094	Lymphocyte cytosolic protein 2 OS=Homo sapiens GN=LCP2 PE=1 SV=1 - [LCP2_HUMAN]	3	3	1	3	6.19	60.1511	6.26514
Q13402	Unconventional myosin-VIIa OS=Homo sapiens GN=MYO7A PE=1 SV=2 - [MYO7A_HUMAN]	3	2	1	2	2.17	254.229	8.57275
Q14683	Structural maintenance of chromosomes protein 1A OS=Homo sapiens GN=SMC1A PE=1 SV=2 - [SMC1A_HUMAN]	3	3	1	3	2.6	143.144	7.63525
Q8IV04	Carabin OS=Homo sapiens GN=TBC1D10C PE=1 SV=1 - [TB10C_HUMAN]	3	3	1	3	11.66	49.6807	8.76318
Q2NKQ1	Small G protein signaling modulator 1 OS=Homo sapiens GN=SGSM1 PE=1 SV=2 - [SGSM1_HUMAN]	3	2	1	2	1.92	129.636	5.69385
Q14686	Nuclear receptor coactivator 6 OS=Homo sapiens GN=NCOA6 PE=1 SV=3 - [NCOA6_HUMAN]	3	3	1	3	3.34	219.008	9.36377
P32456	Guanylate-binding protein 2 OS=Homo sapiens GN=GBP2 PE=1 SV=3 - [GBP2_HUMAN]	3	3	1	2	10.32	67.1664	5.70654
Q9BXT4	Tudor domain-containing protein 1 OS=Homo sapiens GN=TDRD1 PE=1 SV=2 - [TDRD1_HUMAN]	3	3	1	3	2.2	131.939	6.34131
Q96RN1	Testis anion transporter 1 OS=Homo sapiens GN=SLC26A8 PE=1 SV=1 - [S26A8_HUMAN]	3	2	1	2	4.64	108.935	6.23975
Q8TE57	A disintegrin and metalloproteinase with thrombospondin motifs 16 OS=Homo sapiens GN=ADAMTS16 PE=2 SV=3 - [ATS16_HUMAN]	3	2	1	2	2.7	136.114	8.63135
Q52LG2	Keratin-associated protein 13-2 OS=Homo sapiens GN=KRTAP13-2 PE=2 SV=1 - [KR132_HUMAN]	3	3	1	3	40	18.7141	8.29443
Q9UKG9	Peroxisomal carnitine O-octanoyltransferase OS=Homo sapiens GN=CROT PE=1 SV=2 - [OCTC_HUMAN]	3	2	1	2	9.64	70.1333	7.07861
O60547	GDP-mannose 4,6 dehydratase OS=Homo sapiens GN=GMDS PE=1 SV=1 - [GMDS_HUMAN]	3	2	1	2	6.99	41.9233	7.31299
Q5T4T1	Transmembrane protein 170B OS=Homo sapiens GN=TMEM170B PE=3 SV=1 - [T170B_HUMAN]	3	2	1	2	46.21	14.3507	10.4038
Q6N021	Methylcytosine dioxygenase TET2 OS=Homo sapiens GN=TET2 PE=1 SV=3 - [TET2_HUMAN]	3	3	1	3	2.65	223.671	7.98682
Q9C0C2	182 kDa tankyrase-1-binding protein OS=Homo sapiens GN=TNKS1BP1 PE=1 SV=4 - [TB182_HUMAN]	3	2	1	2	1.56	181.685	4.85596
Q9H251	Cadherin-23 OS=Homo sapiens GN=CDH23 PE=1 SV=2 - [CAD23_HUMAN]	3	2	1	2	0.81	369.266	4.66553
Q05513	Protein kinase C zeta type OS=Homo sapiens GN=PRKCZ PE=1 SV=4 - [KPCZ_HUMAN]	3	3	1	3	12.33	67.6167	5.77002
O00555	Voltage-dependent P/Q-type calcium channel subunit alpha-1A OS=Homo sapiens GN=CACNA1A PE=1 SV=2 - [CAC1A_HUMAN]	3	2	1	2	1.92	282.185	8.83643
Q8IW52	SLIT and NTRK-like protein 4 OS=Homo sapiens GN=SLITRK4 PE=2 SV=1 - [SLIK4_HUMAN]	3	2	1	2	4.3	94.2713	7.79639
Q902F9	Endogenous retrovirus group K member 113 Env polyprotein OS=Homo sapiens GN=HERVK_113 PE=1 SV=1 - [EN113_HUMAN]	3	2	9	2	9.73	79.1435	8.80713
P00568	Adenylate kinase isoenzyme 1 OS=Homo sapiens GN=AK1 PE=1 SV=3 - [KAD1_HUMAN]	3	2	2	2	11.86	21.6213	8.63135
Q6DT37	Serine/threonine-protein kinase MRCK gamma OS=Homo sapiens GN=CDC42BPG PE=1 SV=2 - [MRCKG_HUMAN]	3	2	1	2	2.06	172.352	6.27783
Q147U1	Zinc finger protein 846 OS=Homo sapiens GN=ZNF846 PE=1 SV=2 - [ZN846_HUMAN]	3	2	1	2	9.19	60.5128	8.99756
Q8IWA4	Mitofusin-1 OS=Homo sapiens GN=MFN1 PE=1 SV=2 - [MFN1_HUMAN]	2	2	2	2	2.29	84.0471	6.25244
O75330	Hyaluronan mediated motility receptor OS=Homo sapiens GN=HMMR PE=1 SV=2 - [HMMR_HUMAN]	2	2	1	2	2.9	84.0487	5.8335
A0AVT1	Ubiquitin-like modifier-activating enzyme 6 OS=Homo sapiens GN=UBA6 PE=1 SV=1 - [UBA6_HUMAN]	2	2	1	2	2.09	117.895	6.13818
Q5T160	Probable arginine--tRNA ligase, mitochondrial OS=Homo sapiens GN=RARS2 PE=1 SV=1 - [SYRM_HUMAN]	2	2	1	2	7.61	65.464	8.20654
Q7L4P6	BEN domain-containing protein 5 OS=Homo sapiens GN=BEND5 PE=1 SV=1 - [BEND5_HUMAN]	2	2	1	2	4.99	48.1517	6.20166
Q8NFQ5	BPI fold-containing family B member 6 OS=Homo sapiens GN=BPIFB6 PE=1 SV=1 - [BPIB6_HUMAN]	2	2	1	2	8.39	49.6843	8.83643
Q96J65	Multidrug resistance-associated protein 9 OS=Homo sapiens GN=ABCC12 PE=1 SV=2 - [MRP9_HUMAN]	2	2	1	2	3.83	152.2	8.35303
P56179	Homeobox protein DLX-6 OS=Homo sapiens GN=DLX6 PE=2 SV=2 - [DLX6_HUMAN]	2	2	1	2	13.71	19.6959	9.94971
Q86WV6	Stimulator of interferon genes protein OS=Homo sapiens GN=TMEM173 PE=1 SV=1 - [STING_HUMAN]	2	2	1	2	6.86	42.1658	7.04932
Q99466	Neurogenic locus notch homolog protein 4 OS=Homo sapiens GN=NOTCH4 PE=1 SV=2 - [NOTC4_HUMAN]	2	2	1	2	2.35	209.48	5.73193
Q13615	Myotubularin-related protein 3 OS=Homo sapiens GN=MTMR3 PE=1 SV=3 - [MTMR3_HUMAN]	2	2	1	2	2.67	133.534	5.79541
Q86U86	Protein polybromo-1 OS=Homo sapiens GN=PBRM1 PE=1 SV=1 - [PB1_HUMAN]	2	2	1	2	1.84	192.825	6.88818
O15067	Phosphoribosylformylglycinamidine synthase OS=Homo sapiens GN=PFAS PE=1 SV=4 - [PUR4_HUMAN]	2	2	1	2	3.14	144.643	5.75732
P42680	Tyrosine-protein kinase Tec OS=Homo sapiens GN=TEC PE=1 SV=2 - [TEC_HUMAN]	2	2	1	2	2.22	73.5339	8.44092
P53708	Integrin alpha-8 OS=Homo sapiens GN=ITGA8 PE=1 SV=3 - [ITA8_HUMAN]	2	2	1	2	2.16	117.399	5.57959
Q5D862	Filaggrin-2 OS=Homo sapiens GN=FLG2 PE=1 SV=1 - [FILA2_HUMAN]	2	2	1	2	2.34	247.928	8.30908
Q9Y6H5	Synphilin-1 OS=Homo sapiens GN=SNCAIP PE=1 SV=2 - [SNCAP_HUMAN]	2	2	1	2	1.63	100.347	6.34131
Q6R2W3	SCAN domain-containing protein 3 OS=Homo sapiens GN=ZBED9 PE=2 SV=1 - [SCND3_HUMAN]	2	2	1	2	2.94	151.57	6.72705
O95373	Importin-7 OS=Homo sapiens GN=IPO7 PE=1 SV=1 - [IPO7_HUMAN]	2	2	1	2	4.24	119.44	4.81787
Q01814	Plasma membrane calcium-transporting ATPase 2 OS=Homo sapiens GN=ATP2B2 PE=1 SV=2 - [AT2B2_HUMAN]	2	2	4	2	5.63	136.789	5.90967
Q8N201	Integrator complex subunit 1 OS=Homo sapiens GN=INTS1 PE=1 SV=2 - [INT1_HUMAN]	2	2	1	2	1.1	244.143	6.12549
Q9P0X4	Voltage-dependent T-type calcium channel subunit alpha-1I OS=Homo sapiens GN=CACNA1I PE=1 SV=1 - [CAC1I_HUMAN]	2	2	1	2	1.21	244.945	6.53662
P31944	Caspase-14 OS=Homo sapiens GN=CASP14 PE=1 SV=2 - [CASPE_HUMAN]	2	2	1	2	11.16	27.662	5.57959
P49458	Signal recognition particle 9 kDa protein OS=Homo sapiens GN=SRP9 PE=1 SV=2 - [SRP09_HUMAN]	2	2	1	2	17.44	10.1051	7.97217
Q9NZK5	Adenosine deaminase CECR1 OS=Homo sapiens GN=CECR1 PE=1 SV=2 - [CECR1_HUMAN]	2	2	1	2	3.91	58.8952	7.91357
Q9Y2G1	Myelin regulatory factor OS=Homo sapiens GN=MYRF PE=1 SV=3 - [MRF_HUMAN]	2	2	1	2	4.78	124.319	7.44482
Q8NDP4	Zinc finger protein 439 OS=Homo sapiens GN=ZNF439 PE=1 SV=1 - [ZN439_HUMAN]	2	2	5	2	3.81	58.3574	9.24658
Q9ULT0	Tetratricopeptide repeat protein 7A OS=Homo sapiens GN=TTC7A PE=1 SV=3 - [TTC7A_HUMAN]	2	2	1	2	1.86	96.1231	6.45557
Q9Y2F5	Little elongation complex subunit 1 OS=Homo sapiens GN=ICE1 PE=1 SV=5 - [ICE1_HUMAN]	2	2	1	2	2.12	247.737	5.47803
Q92759	General transcription factor IIH subunit 4 OS=Homo sapiens GN=GTF2H4 PE=1 SV=1 - [TF2H4_HUMAN]	2	2	1	2	7.14	52.1533	9.0415
Q9H1E1	Ribonuclease 7 OS=Homo sapiens GN=RNASE7 PE=1 SV=2 - [RNAS7_HUMAN]	2	2	1	2	7.69	17.4079	9.68604
P42356	Phosphatidylinositol 4-kinase alpha OS=Homo sapiens GN=PI4KA PE=1 SV=4 - [PI4KA_HUMAN]	2	2	1	2	1.14	236.678	7.06396
O15480	Melanoma-associated antigen B3 OS=Homo sapiens GN=MAGEB3 PE=2 SV=2 - [MAGB3_HUMAN]	2	2	9	2	6.94	39.1855	10.0669
Q14832	Metabotropic glutamate receptor 3 OS=Homo sapiens GN=GRM3 PE=1 SV=2 - [GRM3_HUMAN]	2	2	1	2	4.44	98.8147	7.66455
Q13363	C-terminal-binding protein 1 OS=Homo sapiens GN=CTBP1 PE=1 SV=2 - [CTBP1_HUMAN]	2	2	2	2	11.59	47.5055	6.771
P0C221	Coiled-coil domain-containing protein 175 OS=Homo sapiens GN=CCDC175 PE=4 SV=2 - [CC175_HUMAN]	2	2	1	2	3.03	93.5672	6.7124
Q05586	Glutamate receptor ionotropic, NMDA 1 OS=Homo sapiens GN=GRIN1 PE=1 SV=1 - [NMDZ1_HUMAN]	2	2	1	2	2.35	105.306	8.88037
O75037	Kinesin-like protein KIF21B OS=Homo sapiens GN=KIF21B PE=1 SV=2 - [KI21B_HUMAN]	2	2	1	2	2.5	182.548	7.07861
Q9UGM5	Fetuin-B OS=Homo sapiens GN=FETUB PE=1 SV=2 - [FETUB_HUMAN]	2	2	1	2	6.28	42.028	6.82959
Q6P4I2	WD repeat-containing protein 73 OS=Homo sapiens GN=WDR73 PE=1 SV=1 - [WDR73_HUMAN]	2	2	1	2	5.03	41.6589	5.78271
Q7Z3Z4	Piwi-like protein 4 OS=Homo sapiens GN=PIWIL4 PE=2 SV=2 - [PIWL4_HUMAN]	2	2	1	2	3.17	96.5264	8.88037
Q99816	Tumor susceptibility gene 101 protein OS=Homo sapiens GN=TSG101 PE=1 SV=2 - [TS101_HUMAN]	2	2	1	2	7.44	43.9165	6.45557
Q9H0R4	Haloacid dehalogenase-like hydrolase domain-containing protein 2 OS=Homo sapiens GN=HDHD2 PE=1 SV=1 - [HDHD2_HUMAN]	2	2	1	2	8.11	28.5179	6.23975
Q9H845	Acyl-CoA dehydrogenase family member 9, mitochondrial OS=Homo sapiens GN=ACAD9 PE=1 SV=1 - [ACAD9_HUMAN]	2	2	1	2	3.86	68.7167	7.95752
P22061	Protein-L-isoaspartate(D-aspartate) O-methyltransferase OS=Homo sapiens GN=PCMT1 PE=1 SV=4 - [PIMT_HUMAN]	2	2	1	2	26.43	24.6206	7.21045
O43633	Charged multivesicular body protein 2a OS=Homo sapiens GN=CHMP2A PE=1 SV=1 - [CHM2A_HUMAN]	2	2	1	2	7.21	25.0879	5.97314
P26368	Splicing factor U2AF 65 kDa subunit OS=Homo sapiens GN=U2AF2 PE=1 SV=4 - [U2AF2_HUMAN]	2	2	1	2	5.47	53.4672	9.08545
P53004	Biliverdin reductase A OS=Homo sapiens GN=BLVRA PE=1 SV=2 - [BIEA_HUMAN]	2	2	1	2	8.11	33.4073	6.44287
Q16795	NADH dehydrogenase [ubiquinone] 1 alpha subcomplex subunit 9, mitochondrial OS=Homo sapiens GN=NDUFA9 PE=1 SV=2 - [NDUA9_HUMAN]	2	2	1	2	5.84	42.4826	9.80322
Q86Y38	Xylosyltransferase 1 OS=Homo sapiens GN=XYLT1 PE=1 SV=1 - [XYLT1_HUMAN]	2	2	1	2	3.65	107.501	9.21729
Q9ULY5	C-type lectin domain family 4 member E OS=Homo sapiens GN=CLEC4E PE=1 SV=1 - [CLC4E_HUMAN]	2	2	1	2	11.87	25.0558	5.19873
P01817	Immunoglobulin heavy variable 2-5 OS=Homo sapiens GN=IGHV2-5 PE=1 SV=2 - [HV205_HUMAN]	2	2	1	2	42.02	13.2228	8.29443
Q8N5C6	S1 RNA-binding domain-containing protein 1 OS=Homo sapiens GN=SRBD1 PE=1 SV=2 - [SRBD1_HUMAN]	2	2	1	2	2.61	111.705	8.71924
Q16537	Serine/threonine-protein phosphatase 2A 56 kDa regulatory subunit epsilon isoform OS=Homo sapiens GN=PPP2R5E PE=1 SV=1 - [2A5E_HUMAN]	2	2	2	2	4.71	54.6645	6.94678
P16435	NADPH--cytochrome P450 reductase OS=Homo sapiens GN=POR PE=1 SV=2 - [NCPR_HUMAN]	2	2	1	2	2.36	76.6413	5.57959
Q9NP72	Ras-related protein Rab-18 OS=Homo sapiens GN=RAB18 PE=1 SV=1 - [RAB18_HUMAN]	2	2	1	2	10.68	22.9626	5.23682
Q9NZD2	Glycolipid transfer protein OS=Homo sapiens GN=GLTP PE=1 SV=3 - [GLTP_HUMAN]	2	2	1	2	15.79	23.8344	7.38623
Q9UQ80	Proliferation-associated protein 2G4 OS=Homo sapiens GN=PA2G4 PE=1 SV=3 - [PA2G4_HUMAN]	2	2	1	2	4.57	43.7592	6.55127
O00151	PDZ and LIM domain protein 1 OS=Homo sapiens GN=PDLIM1 PE=1 SV=4 - [PDLI1_HUMAN]	2	2	1	2	6.99	36.049	7.02002
P14735	Insulin-degrading enzyme OS=Homo sapiens GN=IDE PE=1 SV=4 - [IDE_HUMAN]	2	2	1	2	4.02	117.893	6.60986
Q7L1Q6	Basic leucine zipper and W2 domain-containing protein 1 OS=Homo sapiens GN=BZW1 PE=1 SV=1 - [BZW1_HUMAN]	2	2	1	2	8.11	48.0127	5.92236
Q06455	Protein CBFA2T1 OS=Homo sapiens GN=RUNX1T1 PE=1 SV=2 - [MTG8_HUMAN]	2	2	1	2	9.77	67.5244	7.94287
Q96LZ7	Regulator of microtubule dynamics protein 2 OS=Homo sapiens GN=RMDN2 PE=1 SV=2 - [RMD2_HUMAN]	2	2	1	2	8.29	47.3692	6.53662
Q2NL67	Poly [ADP-ribose] polymerase 6 OS=Homo sapiens GN=PARP6 PE=2 SV=1 - [PARP6_HUMAN]	2	2	1	2	3.33	71.0692	8.33838
Q49A17	Polypeptide N-acetylgalactosaminyltransferase-like 6 OS=Homo sapiens GN=GALNTL6 PE=2 SV=2 - [GLTL6_HUMAN]	2	2	2	2	5.82	69.7428	7.45947
Q5T1M5	FK506-binding protein 15 OS=Homo sapiens GN=FKBP15 PE=1 SV=2 - [FKB15_HUMAN]	2	2	1	2	1.8	133.547	5.19873
Q7Z6Z7	E3 ubiquitin-protein ligase HUWE1 OS=Homo sapiens GN=HUWE1 PE=1 SV=3 - [HUWE1_HUMAN]	2	2	1	2	0.66	481.589	5.22412
Q8NGR4	Olfactory receptor 5C1 OS=Homo sapiens GN=OR5C1 PE=2 SV=1 - [OR5C1_HUMAN]	2	2	1	2	21.25	34.968	8.52881
Q8NHQ1	Centrosomal protein of 70 kDa OS=Homo sapiens GN=CEP70 PE=1 SV=2 - [CEP70_HUMAN]	2	2	1	2	7.71	69.7079	5.70654
O00231	26S proteasome non-ATPase regulatory subunit 11 OS=Homo sapiens GN=PSMD11 PE=1 SV=3 - [PSD11_HUMAN]	2	2	1	2	4.5	47.434	6.48096
O60684	Importin subunit alpha-7 OS=Homo sapiens GN=KPNA6 PE=1 SV=1 - [IMA7_HUMAN]	2	2	3	2	3.73	59.9915	4.98291
P42261	Glutamate receptor 1 OS=Homo sapiens GN=GRIA1 PE=1 SV=2 - [GRIA1_HUMAN]	2	2	1	2	6.18	101.441	7.7085
Q9UJU3	Zinc finger protein 112 OS=Homo sapiens GN=ZNF112 PE=2 SV=2 - [ZN112_HUMAN]	2	2	1	2	4.71	105.775	8.26514
Q5T5C0	Syntaxin-binding protein 5 OS=Homo sapiens GN=STXBP5 PE=1 SV=1 - [STXB5_HUMAN]	2	2	1	2	2.35	127.492	7.28369
Q9Y2L8	Zinc finger protein with KRAB and SCAN domains 5 OS=Homo sapiens GN=ZKSCAN5 PE=1 SV=1 - [ZKSC5_HUMAN]	2	2	1	2	2.5	96.8415	7.56201
Q9Y6N6	Laminin subunit gamma-3 OS=Homo sapiens GN=LAMC3 PE=1 SV=3 - [LAMC3_HUMAN]	2	2	1	2	1.4	171.117	6.58057
Q9NZR2	Low-density lipoprotein receptor-related protein 1B OS=Homo sapiens GN=LRP1B PE=1 SV=2 - [LRP1B_HUMAN]	2	2	1	2	0.76	515.159	5.30029
Q9P2E2	Kinesin-like protein KIF17 OS=Homo sapiens GN=KIF17 PE=2 SV=3 - [KIF17_HUMAN]	2	2	1	2	3.89	114.997	5.50342
Q7Z4N2	Transient receptor potential cation channel subfamily M member 1 OS=Homo sapiens GN=TRPM1 PE=1 SV=2 - [TRPM1_HUMAN]	2	2	2	2	2.99	182.062	6.84424
Q92896	Golgi apparatus protein 1 OS=Homo sapiens GN=GLG1 PE=1 SV=2 - [GSLG1_HUMAN]	2	2	1	2	2.46	134.464	6.90283
Q9BRD0	BUD13 homolog OS=Homo sapiens GN=BUD13 PE=1 SV=1 - [BUD13_HUMAN]	2	2	1	2	7.59	70.4783	9.86182
Q9UN88	Gamma-aminobutyric acid receptor subunit theta OS=Homo sapiens GN=GABRQ PE=2 SV=2 - [GBRT_HUMAN]	2	2	1	2	6.33	71.9758	5.89697
O96011	Peroxisomal membrane protein 11B OS=Homo sapiens GN=PEX11B PE=1 SV=1 - [PX11B_HUMAN]	2	2	1	2	9.27	28.4132	9.84717
P51809	Vesicle-associated membrane protein 7 OS=Homo sapiens GN=VAMP7 PE=1 SV=3 - [VAMP7_HUMAN]	2	2	1	2	7.27	24.919	8.60205
Q8N127	Olfactory receptor 5AS1 OS=Homo sapiens GN=OR5AS1 PE=3 SV=1 - [O5AS1_HUMAN]	2	2	1	2	12.65	36.6279	8.27979
Q9NP81	Serine--tRNA ligase, mitochondrial OS=Homo sapiens GN=SARS2 PE=1 SV=1 - [SYSM_HUMAN]	2	2	1	2	8.69	58.2459	8.1333
Q9Y2G8	DnaJ homolog subfamily C member 16 OS=Homo sapiens GN=DNAJC16 PE=2 SV=3 - [DJC16_HUMAN]	2	2	1	2	2.05	90.5345	7.12256
Q03164	Histone-lysine N-methyltransferase 2A OS=Homo sapiens GN=KMT2A PE=1 SV=5 - [KMT2A_HUMAN]	2	2	1	2	0.96	431.497	9.08545
Q6ZUA9	Maestro heat-like repeat family member 5 OS=Homo sapiens GN=MROH5 PE=2 SV=2 - [MROH5_HUMAN]	2	2	1	2	3.87	148.995	7.69385
Q9HCE0	Ectopic P granules protein 5 homolog OS=Homo sapiens GN=EPG5 PE=1 SV=2 - [EPG5_HUMAN]	2	2	1	2	0.93	292.293	6.43018
Q5XPI4	E3 ubiquitin-protein ligase RNF123 OS=Homo sapiens GN=RNF123 PE=1 SV=1 - [RN123_HUMAN]	2	2	1	2	1.22	148.42	6.7417
A7MBM2	Protein dispatched homolog 2 OS=Homo sapiens GN=DISP2 PE=2 SV=2 - [DISP2_HUMAN]	2	2	1	2	2.14	151.906	7.85498
Q9UBI4	Stomatin-like protein 1 OS=Homo sapiens GN=STOML1 PE=1 SV=1 - [STML1_HUMAN]	2	2	1	2	5.78	42.9405	7.98682
O15259	Nephrocystin-1 OS=Homo sapiens GN=NPHP1 PE=1 SV=1 - [NPHP1_HUMAN]	2	2	1	2	3.14	83.2472	5.19873
Q9P2M7	Cingulin OS=Homo sapiens GN=CGN PE=1 SV=2 - [CING_HUMAN]	2	2	1	2	3.01	136.304	5.5415
Q8ND07	Basal body-orientation factor 1 OS=Homo sapiens GN=BBOF1 PE=2 SV=3 - [BBOF1_HUMAN]	2	2	1	2	3.4	61.9485	9.0415
Q96EU6	Ribosomal RNA processing protein 36 homolog OS=Homo sapiens GN=RRP36 PE=1 SV=1 - [RRP36_HUMAN]	2	2	2	2	8.11	29.8049	10.1694
P48995	Short transient receptor potential channel 1 OS=Homo sapiens GN=TRPC1 PE=1 SV=1 - [TRPC1_HUMAN]	2	2	1	2	2.4	91.1528	8.04541
Q02108	Guanylate cyclase soluble subunit alpha-3 OS=Homo sapiens GN=GUCY1A3 PE=1 SV=2 - [GCYA3_HUMAN]	2	2	1	2	6.67	77.4023	7.10791
Q8N8R5	UPF0565 protein C2orf69 OS=Homo sapiens GN=C2orf69 PE=1 SV=1 - [CB069_HUMAN]	2	2	1	2	7.01	43.4206	8.08936
Q53FA7	Quinone oxidoreductase PIG3 OS=Homo sapiens GN=TP53I3 PE=1 SV=2 - [QORX_HUMAN]	2	2	1	2	6.93	35.5136	7.1665
O75165	DnaJ homolog subfamily C member 13 OS=Homo sapiens GN=DNAJC13 PE=1 SV=5 - [DJC13_HUMAN]	2	2	1	2	0.89	254.252	6.7417
P45877	Peptidyl-prolyl cis-trans isomerase C OS=Homo sapiens GN=PPIC PE=1 SV=1 - [PPIC_HUMAN]	2	2	1	2	9.91	22.7488	8.39697
Q86UA1	Pre-mRNA-processing factor 39 OS=Homo sapiens GN=PRPF39 PE=1 SV=3 - [PRP39_HUMAN]	2	2	1	2	6.28	78.3805	5.40186
Q9Y3D6	Mitochondrial fission 1 protein OS=Homo sapiens GN=FIS1 PE=1 SV=2 - [FIS1_HUMAN]	2	2	1	2	17.76	16.927	8.79248
P55265	Double-stranded RNA-specific adenosine deaminase OS=Homo sapiens GN=ADAR PE=1 SV=4 - [DSRAD_HUMAN]	2	2	1	2	1.47	135.981	8.646
Q8WTP8	Apoptosis-enhancing nuclease OS=Homo sapiens GN=AEN PE=1 SV=2 - [AEN_HUMAN]	2	2	1	2	10.77	36.3274	9.27588
O14672	Disintegrin and metalloproteinase domain-containing protein 10 OS=Homo sapiens GN=ADAM10 PE=1 SV=1 - [ADA10_HUMAN]	2	2	1	2	2.81	84.0877	7.76709
Q86SF2	N-acetylgalactosaminyltransferase 7 OS=Homo sapiens GN=GALNT7 PE=1 SV=1 - [GALT7_HUMAN]	2	2	1	2	3.65	75.341	7.10791
Q8ND23	Capping protein, Arp2/3 and myosin-I linker protein 3 OS=Homo sapiens GN=CARMIL3 PE=2 SV=2 - [CARL3_HUMAN]	2	2	1	2	2.33	150.137	7.44482
O14513	Nck-associated protein 5 OS=Homo sapiens GN=NCKAP5 PE=1 SV=2 - [NCKP5_HUMAN]	2	2	1	2	1.2	208.409	8.07471
Q8IV35	WD repeat-containing protein 49 OS=Homo sapiens GN=WDR49 PE=2 SV=1 - [WDR49_HUMAN]	2	2	1	2	8.32	79.2445	8.47021
A1A5D9	BICD family-like cargo adapter 2 OS=Homo sapiens GN=BICDL2 PE=1 SV=2 - [BICL2_HUMAN]	2	2	1	2	5.31	56.8002	5.021
Q92613	Protein Jade-3 OS=Homo sapiens GN=JADE3 PE=1 SV=1 - [JADE3_HUMAN]	2	2	1	2	1.82	93.7481	7.18115
Q9HCK1	DBF4-type zinc finger-containing protein 2 OS=Homo sapiens GN=ZDBF2 PE=1 SV=3 - [ZDBF2_HUMAN]	2	2	1	2	0.89	265.453	6.16357
Q96NW4	Ankyrin repeat domain-containing protein 27 OS=Homo sapiens GN=ANKRD27 PE=1 SV=2 - [ANR27_HUMAN]	2	2	1	2	2.29	116.91	6.87354
P25391	Laminin subunit alpha-1 OS=Homo sapiens GN=LAMA1 PE=1 SV=2 - [LAMA1_HUMAN]	2	2	1	2	1.37	336.867	6.354
Q9Y6V7	Probable ATP-dependent RNA helicase DDX49 OS=Homo sapiens GN=DDX49 PE=1 SV=1 - [DDX49_HUMAN]	2	2	1	2	5.8	54.192	9.05615
O76027	Annexin A9 OS=Homo sapiens GN=ANXA9 PE=1 SV=3 - [ANXA9_HUMAN]	2	2	1	2	4.93	38.3399	5.77002
P05026	Sodium/potassium-transporting ATPase subunit beta-1 OS=Homo sapiens GN=ATP1B1 PE=1 SV=1 - [AT1B1_HUMAN]	2	2	1	2	12.87	35.0389	8.52881
Q3KQU3	MAP7 domain-containing protein 1 OS=Homo sapiens GN=MAP7D1 PE=1 SV=1 - [MA7D1_HUMAN]	2	2	1	2	2.62	92.7641	10.1108
Q86YF9	Zinc finger protein DZIP1 OS=Homo sapiens GN=DZIP1 PE=1 SV=1 - [DZIP1_HUMAN]	2	2	1	2	2.54	98.6017	6.15088
Q53HI1	Protein unc-50 homolog OS=Homo sapiens GN=UNC50 PE=1 SV=2 - [UNC50_HUMAN]	2	2	1	2	24.71	30.3531	9.46631
Q9UJF2	Ras GTPase-activating protein nGAP OS=Homo sapiens GN=RASAL2 PE=1 SV=2 - [NGAP_HUMAN]	2	2	1	2	1.84	128.477	8.23584
B1ATL7	Proline-rich protein 32 OS=Homo sapiens GN=PRR32 PE=4 SV=1 - [PRR32_HUMAN]	2	2	1	2	11.74	31.87	7.60596
Q63HQ2	Pikachurin OS=Homo sapiens GN=EGFLAM PE=1 SV=2 - [EGFLA_HUMAN]	2	2	1	2	2.65	111.2	7.40088
Q09MP3	RAD51-associated protein 2 OS=Homo sapiens GN=RAD51AP2 PE=1 SV=1 - [R51A2_HUMAN]	2	2	1	2	2.24	133.822	7.34229
O95789	Zinc finger MYM-type protein 6 OS=Homo sapiens GN=ZMYM6 PE=1 SV=2 - [ZMYM6_HUMAN]	2	2	1	2	1.66	147.992	8.22119
Q8TCU5	Glutamate receptor ionotropic, NMDA 3A OS=Homo sapiens GN=GRIN3A PE=1 SV=2 - [NMD3A_HUMAN]	2	2	1	2	2.33	125.385	7.59131
Q8IY82	Dynein regulatory complex subunit 7 OS=Homo sapiens GN=DRC7 PE=1 SV=3 - [DRC7_HUMAN]	2	2	1	2	5.72	103.431	5.66846
P51530	DNA replication ATP-dependent helicase/nuclease DNA2 OS=Homo sapiens GN=DNA2 PE=1 SV=3 - [DNA2_HUMAN]	2	2	1	2	4.53	120.337	7.73779
P08581	Hepatocyte growth factor receptor OS=Homo sapiens GN=MET PE=1 SV=4 - [MET_HUMAN]	2	2	1	2	2.88	155.441	7.32764
Q9H009	Nascent polypeptide-associated complex subunit alpha-2 OS=Homo sapiens GN=NACA2 PE=1 SV=1 - [NACA2_HUMAN]	2	2	1	2	11.63	23.2088	4.729
O15482	Testis-specific protein TEX28 OS=Homo sapiens GN=TEX28 PE=2 SV=1 - [TEX28_HUMAN]	2	2	1	2	12.44	46.1024	6.23975
P32969	60S ribosomal protein L9 OS=Homo sapiens GN=RPL9 PE=1 SV=1 - [RL9_HUMAN]	2	2	1	2	13.02	21.8498	9.94971
P50213	Isocitrate dehydrogenase [NAD] subunit alpha, mitochondrial OS=Homo sapiens GN=IDH3A PE=1 SV=1 - [IDH3A_HUMAN]	2	2	1	2	6.83	39.5661	6.91748
Q3BBV0	Neuroblastoma breakpoint family member 1 OS=Homo sapiens GN=NBPF1 PE=2 SV=1 - [NBPF1_HUMAN]	2	2	8	2	6.1	139.256	4.77979
Q92974	Rho guanine nucleotide exchange factor 2 OS=Homo sapiens GN=ARHGEF2 PE=1 SV=4 - [ARHG2_HUMAN]	2	2	1	2	1.83	111.473	7.26904
Q15788	Nuclear receptor coactivator 1 OS=Homo sapiens GN=NCOA1 PE=1 SV=3 - [NCOA1_HUMAN]	2	2	1	2	3.4	156.658	6.20166
Q9H2D6	TRIO and F-actin-binding protein OS=Homo sapiens GN=TRIOBP PE=1 SV=3 - [TARA_HUMAN]	2	2	1	2	1.06	261.217	8.48486
Q9UBI6	Guanine nucleotide-binding protein G(I)/G(S)/G(O) subunit gamma-12 OS=Homo sapiens GN=GNG12 PE=1 SV=3 - [GBG12_HUMAN]	2	2	1	2	31.94	8.00117	8.96826
Q9UHL9	General transcription factor II-I repeat domain-containing protein 1 OS=Homo sapiens GN=GTF2IRD1 PE=1 SV=1 - [GT2D1_HUMAN]	2	2	1	2	1.77	105.991	6.87354
Q5T5Y3	Calmodulin-regulated spectrin-associated protein 1 OS=Homo sapiens GN=CAMSAP1 PE=1 SV=2 - [CAMP1_HUMAN]	2	2	1	2	2.43	177.861	6.72705
Q9UI33	Sodium channel protein type 11 subunit alpha OS=Homo sapiens GN=SCN11A PE=1 SV=2 - [SCNBA_HUMAN]	2	2	1	2	2.62	204.788	7.98682
O94804	Serine/threonine-protein kinase 10 OS=Homo sapiens GN=STK10 PE=1 SV=1 - [STK10_HUMAN]	2	2	1	2	3.1	112.065	6.94678
Q2M1K9	Zinc finger protein 423 OS=Homo sapiens GN=ZNF423 PE=1 SV=1 - [ZN423_HUMAN]	2	2	1	2	4.91	144.511	6.88818
Q9BV36	Melanophilin OS=Homo sapiens GN=MLPH PE=1 SV=1 - [MELPH_HUMAN]	2	2	1	2	3.5	65.9088	6.07471
P51800	Chloride channel protein ClC-Ka OS=Homo sapiens GN=CLCNKA PE=1 SV=1 - [CLCKA_HUMAN]	2	2	1	2	6.26	75.2361	7.7085
A6NES4	Maestro heat-like repeat-containing protein family member 2A OS=Homo sapiens GN=MROH2A PE=4 SV=4 - [MRO2A_HUMAN]	2	2	1	2	2.99	189.438	6.68311
Q99698	Lysosomal-trafficking regulator OS=Homo sapiens GN=LYST PE=1 SV=3 - [LYST_HUMAN]	2	2	1	2	0.87	428.866	6.60986
Q5SNV9	Uncharacterized protein C1orf167 OS=Homo sapiens GN=C1orf167 PE=2 SV=2 - [CA167_HUMAN]	2	2	1	2	2.38	162.321	10.6968
Q8TD90	Melanoma-associated antigen E2 OS=Homo sapiens GN=MAGEE2 PE=2 SV=1 - [MAGE2_HUMAN]	2	2	1	2	4.02	60.3393	5.09717
Q9NU22	Midasin OS=Homo sapiens GN=MDN1 PE=1 SV=2 - [MDN1_HUMAN]	2	2	1	2	0.77	632.42	5.68115
Q9H7E2	Tudor domain-containing protein 3 OS=Homo sapiens GN=TDRD3 PE=1 SV=1 - [TDRD3_HUMAN]	2	2	1	2	8.14	73.1396	9.23193
O95071	E3 ubiquitin-protein ligase UBR5 OS=Homo sapiens GN=UBR5 PE=1 SV=2 - [UBR5_HUMAN]	2	2	1	2	1.07	309.158	5.84619
Q9ULD6	Protein inturned OS=Homo sapiens GN=INTU PE=1 SV=2 - [INTU_HUMAN]	2	2	1	2	5.52	105.582	5.89697
A2RTY3	Protein HEATR9 OS=Homo sapiens GN=HEATR9 PE=2 SV=2 - [HEAT9_HUMAN]	2	2	1	2	9.12	65.6385	9.20264
Q8IVG5	Sterile alpha motif domain-containing protein 9-like OS=Homo sapiens GN=SAMD9L PE=1 SV=2 - [SAM9L_HUMAN]	2	2	1	2	1.52	184.415	8.01611
Q9H257	Caspase recruitment domain-containing protein 9 OS=Homo sapiens GN=CARD9 PE=1 SV=2 - [CARD9_HUMAN]	2	2	1	2	5.04	62.2019	6.07471
Q9NRX5	Serine incorporator 1 OS=Homo sapiens GN=SERINC1 PE=1 SV=1 - [SERC1_HUMAN]	2	2	1	2	10.82	50.4612	5.84619
Q9UDY8	Mucosa-associated lymphoid tissue lymphoma translocation protein 1 OS=Homo sapiens GN=MALT1 PE=1 SV=1 - [MALT1_HUMAN]	2	2	1	2	4.49	92.2131	5.73193
P07954	Fumarate hydratase, mitochondrial OS=Homo sapiens GN=FH PE=1 SV=3 - [FUMH_HUMAN]	2	2	1	2	2.94	54.6022	8.76318
Q68DQ2	Very large A-kinase anchor protein OS=Homo sapiens GN=CRYBG3 PE=1 SV=3 - [CRBG3_HUMAN]	2	2	1	2	1.85	330.427	5.19873
Q8NI36	WD repeat-containing protein 36 OS=Homo sapiens GN=WDR36 PE=1 SV=1 - [WDR36_HUMAN]	2	2	1	2	5.78	105.255	7.53271
Q96L42	Potassium voltage-gated channel subfamily H member 8 OS=Homo sapiens GN=KCNH8 PE=2 SV=2 - [KCNH8_HUMAN]	2	2	1	2	4.43	123.726	6.91748
Q8NFP4	MAM domain-containing glycosylphosphatidylinositol anchor protein 1 OS=Homo sapiens GN=MDGA1 PE=1 SV=1 - [MDGA1_HUMAN]	2	2	1	2	2.3	105.724	8.33838
Q01484	Ankyrin-2 OS=Homo sapiens GN=ANK2 PE=1 SV=4 - [ANK2_HUMAN]	2	2	1	2	0.63	433.448	5.13525
Q9H1E5	Thioredoxin-related transmembrane protein 4 OS=Homo sapiens GN=TMX4 PE=1 SV=1 - [TMX4_HUMAN]	2	2	1	2	3.44	38.9277	4.37354
O95453	Poly(A)-specific ribonuclease PARN OS=Homo sapiens GN=PARN PE=1 SV=1 - [PARN_HUMAN]	2	2	1	2	7.36	73.4048	6.20166
P40818	Ubiquitin carboxyl-terminal hydrolase 8 OS=Homo sapiens GN=USP8 PE=1 SV=1 - [UBP8_HUMAN]	2	2	1	2	3.22	127.444	8.51416
O00743	Serine/threonine-protein phosphatase 6 catalytic subunit OS=Homo sapiens GN=PPP6C PE=1 SV=1 - [PPP6_HUMAN]	2	2	1	2	8.2	35.1215	5.69385
[truncated: 45 more rows]

## Sheet: B. Mtb proteins
B. M. tuberculosis dataset. A high-resolution high-mass accuracy Q-Exactive mass spectrometer and Sequest-HT as the database search algorithm were used to identify proteins with at least 2 unique peptides per protein group.
Accession	Description	Σ# PSMs	Σ# Peptides	Σ# Proteins	Σ# Unique Peptides	ΣCoverage	MW [kDa]	calc. pI
A0A0T9FA63	Glyceraldehyde-3-phosphate dehydrogenase, type I OS=Mycobacterium tuberculosis GN=gap_2 PE=4 SV=1 - [A0A0T9FA63_MYCTX]	469	11	16	11	70.62	18.8436	5.17334
A0A0T9QIT2	Elongation factor Tu OS=Mycobacterium tuberculosis GN=tuf_2 PE=3 SV=1 - [A0A0T9QIT2_MYCTX]	218	14	1	12	46.72	43.6733	5.21143
A0A0H3L631	Uncharacterized protein OS=Mycobacterium tuberculosis (strain ATCC 35801 / TMC 107 / Erdman) GN=ERDMAN_0674 PE=4 SV=1 - [A0A0H3L631_MYCTE]	210	2	3	2	8.79	20.1463	6.60986
A0A0T9FNH2	Thioredoxin OS=Mycobacterium tuberculosis GN=trxC_2 PE=3 SV=1 - [A0A0T9FNH2_MYCTX]	195	7	1	7	64.42	11.4419	4.88135
A0A0T9K8X6	FtsX-like permease family OS=Mycobacterium tuberculosis GN=ERS075342_01090 PE=3 SV=1 - [A0A0T9K8X6_MYCTX]	182	2	1	2	0.73	113.108	8.67529
A0A0T9PJJ3;rmuc1724_c_1_375	50S ribosomal protein L7/L12 OS=Mycobacterium tuberculosis GN=rplL_2 PE=3 SV=1 - [A0A0T9PJJ3_MYCTX]	109	6	18	6	44.35	12.9689	4.53857
A0A051UI13	Elongation factor Tu OS=Mycobacterium tuberculosis TKK-01-0051 GN=tuf PE=3 SV=1 - [A0A051UI13_MYCTX]	101	8	8	3	24.24	43.7566	5.37646
A0A051U4A2	Methylmalonyl-CoA mutase large subunit MutB OS=Mycobacterium tuberculosis TKK-01-0051 GN=K875_02495 PE=4 SV=1 - [A0A051U4A2_MYCTX]	93	2	4	2	3.33	80.7211	5.24951
A0A0T9FXY5	30S ribosomal protein S6 OS=Mycobacterium tuberculosis GN=rpsF_2 PE=3 SV=1 - [A0A0T9FXY5_MYCTX]	90	3	1	3	33.33	11.1458	5.2749
A0A0T9P2F9	ATP synthase subunit beta OS=Mycobacterium tuberculosis GN=atpD_2 PE=3 SV=1 - [A0A0T9P2F9_MYCTX]	86	5	14	4	13.96	52.9089	4.81787
A0A051U571	Uncharacterized protein OS=Mycobacterium tuberculosis TKK-01-0051 GN=K875_01737 PE=4 SV=1 - [A0A051U571_MYCTX]	61	2	6	2	7.27	29.9316	6.07471
A0A0T9PFG1	Isopropylmalate isomerase large subunit OS=Mycobacterium tuberculosis GN=leuC_2 PE=4 SV=1 - [A0A0T9PFG1_MYCTX]	49	2	1	2	2.66	32.7125	5.38916
A0A0T9RKG8	50S ribosomal protein L5 OS=Mycobacterium tuberculosis GN=rplE_2 PE=3 SV=1 - [A0A0T9RKG8_MYCTX]	45	4	3	4	22.04	20.969	9.33447
A0A0T9S6H4	Alkylhydroperoxide reductase OS=Mycobacterium tuberculosis GN=ERS124361_06799 PE=4 SV=1 - [A0A0T9S6H4_MYCTX]	34	3	3	3	17.1	21.4736	4.61475
A0A0T9RZB6	Ferritin OS=Mycobacterium tuberculosis GN=bfrB_2 PE=4 SV=1 - [A0A0T9RZB6_MYCTX]	32	3	1	3	21.84	19.6518	4.729
A0A0T9JY15	Glutamate dehydrogenase OS=Mycobacterium tuberculosis GN=gdhA PE=3 SV=1 - [A0A0T9JY15_MYCTX]	31	4	1	4	10.92	49.483	5.32568
A0A0T9EHP8	Uncharacterised protein OS=Mycobacterium tuberculosis GN=ERS027659_04021 PE=4 SV=1 - [A0A0T9EHP8_MYCTX]	29	2	1	2	6.84	24.8611	11.3267
A0A0T9PM78	Glyceraldehyde-3-phosphate dehydrogenase OS=Mycobacterium tuberculosis GN=gap_2 PE=3 SV=1 - [A0A0T9PM78_MYCTX]	29	8	1	8	26.65	35.8836	5.57959
A0A0T9RDV1	Uncharacterised protein OS=Mycobacterium tuberculosis GN=ERS075342_09303 PE=4 SV=1 - [A0A0T9RDV1_MYCTX]	28	2	1	2	22.5	8.37516	6.50732
A0A0T9RF16	NAD-dependent glutamate dehydrogenase Gdh OS=Mycobacterium tuberculosis GN=gdh_2 PE=4 SV=1 - [A0A0T9RF16_MYCTX]	26	8	1	2	18.27	70.2425	5.03369
A0A0T9RUV0	NAD-glutamate dehydrogenase OS=Mycobacterium tuberculosis GN=gdhB PE=4 SV=1 - [A0A0T9RUV0_MYCTX]	26	8	1	2	22.09	57.0988	5.13525
A0A0T9F1S2	Alcohol dehydrogenase, class IV OS=Mycobacterium tuberculosis GN=adhE PE=4 SV=1 - [A0A0T9F1S2_MYCTX]	25	2	1	2	10.84	23.1855	6.96143
A0A0T9FF25	50S ribosomal protein L23 OS=Mycobacterium tuberculosis GN=rplW_2 PE=3 SV=1 - [A0A0T9FF25_MYCTX]	25	2	1	2	19.39	10.7789	9.5249
P9WH63;mtub_c_1_734	30S ribosomal protein S12 OS=Mycobacterium tuberculosis (strain ATCC 25618 / H37Rv) GN=rpsL PE=1 SV=1 - [RS12_MYCTU]	24	2	240	2	12.1	13.8408	11.3706
A0A0T9RW53	Phosphoglycerate kinase OS=Mycobacterium tuberculosis GN=pgk_2 PE=3 SV=1 - [A0A0T9RW53_MYCTX]	24	8	1	8	21.38	42.7104	4.98291
A0A0T9QD57	30S ribosomal protein S13 OS=Mycobacterium tuberculosis GN=rpsM_2 PE=3 SV=1 - [A0A0T9QD57_MYCTX]	24	2	1	2	15.57	13.7095	10.5063
A0A0T9MWK6	Fused isobutyryl-CoA mutase OS=Mycobacterium tuberculosis GN=scpA_2 PE=3 SV=1 - [A0A0T9MWK6_MYCTX]	24	2	1	2	1.87	117.391	5.26221
A0A051U1E3	Uncharacterized protein OS=Mycobacterium tuberculosis TKK-01-0051 GN=K875_02677 PE=4 SV=1 - [A0A051U1E3_MYCTX]	24	2	1	2	0.8	219.569	5.26221
A0A0T9QAG8	Aldehyde dehydrogenase OS=Mycobacterium tuberculosis GN=rocA PE=4 SV=1 - [A0A0T9QAG8_MYCTX]	23	7	3	7	23.08	43.9658	6.27783
A0A0T9X5M8	30S ribosomal protein S1 OS=Mycobacterium tuberculosis GN=rpsA PE=4 SV=1 - [A0A0T9X5M8_MYCTX]	23	3	14	3	7.19	47.8236	5.05908
A0A0T9N7A3	Delta-1-pyrroline-5-carboxylate dehydrogenase OS=Mycobacterium tuberculosis GN=rocA PE=4 SV=1 - [A0A0T9N7A3_MYCTX]	23	2	1	2	4.97	58.3395	5.33838
A0A0T9FXX8	UPF0297 protein ERS027644_05161 OS=Mycobacterium tuberculosis GN=ERS027644_05161 PE=3 SV=1 - [A0A0T9FXX8_MYCTX]	23	2	1	2	35.23	10.2212	5.0083
A0A0T9QNP4	Dihydrolipoyl dehydrogenase OS=Mycobacterium tuberculosis GN=pdhD PE=4 SV=1 - [A0A0T9QNP4_MYCTX]	22	8	1	8	24.62	48.083	5.52881
R4MHU9	Polyprenol-monophosphomannose synthase Ppm1 OS=Mycobacterium tuberculosis CAS/NITR204 GN=J113_14120 PE=4 SV=1 - [R4MHU9_MYCTX]	22	2	15	2	7.56	51.7557	9.23193
A0A0T9MBJ4	Putative FtsK/SpoIIIE family protein OS=Mycobacterium tuberculosis GN=eccCa1_3 PE=4 SV=1 - [A0A0T9MBJ4_MYCTX]	21	2	1	2	2.8	179.113	6.27783
A0A0T9P2N9	ATP synthase subunit alpha OS=Mycobacterium tuberculosis GN=atpA_2 PE=3 SV=1 - [A0A0T9P2N9_MYCTX]	20	4	13	2	12.2	58.358	5.22412
A0A0T9S9B1	Histone family protein DNA-binding protein OS=Mycobacterium tuberculosis GN=hup_2 PE=3 SV=1 - [A0A0T9S9B1_MYCTX]	20	2	1	2	34.74	10.0564	10.0669
R4M053	Short chain dehydrogenase OS=Mycobacterium tuberculosis str. Haarlem/NITR202 GN=I917_05990 PE=3 SV=1 - [R4M053_MYCTX]	19	2	9	2	6.91	29.3344	5.74463
A0A051UJ11	DNA-directed RNA polymerase subunit beta' OS=Mycobacterium tuberculosis TKK-01-0051 GN=rpoC PE=3 SV=1 - [A0A051UJ11_MYCTX]	18	3	18	2	2.89	146.719	6.13818
A0A051TU92	Uncharacterized protein OS=Mycobacterium tuberculosis TKK-01-0051 GN=K875_03403 PE=3 SV=1 - [A0A051TU92_MYCTX]	17	2	1	2	4.55	52.5589	6.81494
A0A0T9RLW5	30S ribosomal protein S8 OS=Mycobacterium tuberculosis GN=rpsH_2 PE=3 SV=1 - [A0A0T9RLW5_MYCTX]	15	2	1	2	25.76	14.2157	9.89111
A0A0T9RP23	50S ribosomal protein L11 OS=Mycobacterium tuberculosis GN=rplK_2 PE=3 SV=1 - [A0A0T9RP23_MYCTX]	14	2	1	2	11.97	14.8028	9.27588
A0A0T9Q6M5	Uncharacterised protein OS=Mycobacterium tuberculosis GN=ERS124361_04745 PE=4 SV=1 - [A0A0T9Q6M5_MYCTX]	14	2	1	2	5.73	44.1337	8.23584
A0A0T9QKZ1	2-oxoglutarate dehydrogenase E2 component OS=Mycobacterium tuberculosis GN=dlaT PE=4 SV=1 - [A0A0T9QKZ1_MYCTX]	14	3	1	3	21.22	32.7194	9.20264
A0A0T9M0A5	Cyclopropane fatty-acyl-phospholipid synthase OS=Mycobacterium tuberculosis GN=mmaA1 PE=4 SV=1 - [A0A0T9M0A5_MYCTX]	14	2	1	2	3.33	46.6183	6.93213
A0A0T9SPS9	Elongation factor G OS=Mycobacterium tuberculosis GN=fusA_3 PE=3 SV=1 - [A0A0T9SPS9_MYCTX]	13	4	1	3	8.24	77.344	4.93213
A0A0T9LRD9	30S ribosomal protein S4 OS=Mycobacterium tuberculosis GN=rpsD_2 PE=3 SV=1 - [A0A0T9LRD9_MYCTX]	13	3	1	3	7.21	23.7938	9.80322
A0A0T9SJP8	30S ribosomal protein S9 OS=Mycobacterium tuberculosis GN=rpsI_2 PE=3 SV=1 - [A0A0T9SJP8_MYCTX]	13	4	7	4	26.99	17.6535	10.0815
A0A051TXW2	Uncharacterized protein OS=Mycobacterium tuberculosis TKK-01-0051 GN=K875_02736 PE=4 SV=1 - [A0A051TXW2_MYCTX]	13	4	1	4	0.52	1115.75	4.98291
A0A051TVR1	Uncharacterized protein OS=Mycobacterium tuberculosis TKK-01-0051 GN=K875_03375 PE=4 SV=1 - [A0A051TVR1_MYCTX]	12	2	1	2	6.45	24.1459	5.98584
A0A051TU50	Uncharacterized protein OS=Mycobacterium tuberculosis TKK-01-0051 GN=K875_03391 PE=4 SV=1 - [A0A051TU50_MYCTX]	11	2	1	2	4.36	60.2651	5.80811
A0A0T9LZM2	Ribonucleoside-diphosphate reductase subunit alpha OS=Mycobacterium tuberculosis GN=nrdE2_1 PE=4 SV=1 - [A0A0T9LZM2_MYCTX]	11	4	1	4	3.96	185.158	5.99854
R4LXM0	Acyl-CoA thioesterase II OS=Mycobacterium tuberculosis str. Haarlem/NITR202 GN=I917_18380 PE=4 SV=1 - [R4LXM0_MYCTX]	11	2	8	2	7.12	31.3815	6.11279
A0A0U0TYG9	Uncharacterised protein OS=Mycobacterium tuberculosis GN=ERS007672_05769 PE=4 SV=1 - [A0A0U0TYG9_MYCTX]	11	2	1	2	13.84	26.1328	6.55127
R4LRJ1	Uncharacterized protein OS=Mycobacterium tuberculosis str. Haarlem/NITR202 GN=I917_01700 PE=4 SV=1 - [R4LRJ1_MYCTX]	10	2	1	2	6.99	41.6396	9.80322
A0A051UJH9	Cyclopropane mycolic acid synthase 1 CmaA1 OS=Mycobacterium tuberculosis TKK-01-0051 GN=K875_01298 PE=4 SV=1 - [A0A051UJH9_MYCTX]	10	2	8	2	12.2	33.2594	5.021
A0A0T9R5J8	Succinyl-CoA synthetase, alpha chain OS=Mycobacterium tuberculosis GN=sucD_2 PE=4 SV=1 - [A0A0T9R5J8_MYCTX]	9	3	1	3	56.98	8.67347	7.23975
A0A051UF96	Uncharacterized protein OS=Mycobacterium tuberculosis TKK-01-0051 GN=K875_00392 PE=4 SV=1 - [A0A051UF96_MYCTX]	9	3	1	3	21.55	32.1517	5.22412
A0A051U5J0	Uncharacterized protein OS=Mycobacterium tuberculosis TKK-01-0051 GN=K875_01833 PE=4 SV=1 - [A0A051U5J0_MYCTX]	9	2	1	2	2.94	36.8905	9.42236
A0A051UH55	Uncharacterized protein OS=Mycobacterium tuberculosis TKK-01-0051 GN=K875_01110 PE=4 SV=1 - [A0A051UH55_MYCTX]	9	2	16	2	4.91	49.8442	8.25049
A0A0T9P9V3	Phage shock protein A, PspA OS=Mycobacterium tuberculosis GN=ERS124361_03878 PE=4 SV=1 - [A0A0T9P9V3_MYCTX]	9	5	1	5	27.95	27.9245	5.17334
A0A0T9G3X1	Pneumococcal surface adhesin A OS=Mycobacterium tuberculosis GN=psaA PE=4 SV=1 - [A0A0T9G3X1_MYCTX]	9	2	1	2	64.58	5.40462	4.81787
A0A0T9SPM6	30S ribosomal protein S7 OS=Mycobacterium tuberculosis GN=rpsG_2 PE=3 SV=1 - [A0A0T9SPM6_MYCTX]	9	2	1	2	19.87	17.3143	10.3013
A0A0T9P004	Virulence factor Mce family protein OS=Mycobacterium tuberculosis GN=ERS075342_08563 PE=4 SV=1 - [A0A0T9P004_MYCTX]	9	2	1	2	36.09	14.5345	7.25439
A0A051TJM8	Uncharacterized protein OS=Mycobacterium tuberculosis TKK-01-0051 GN=K875_05463 PE=4 SV=1 - [A0A051TJM8_MYCTX]	9	2	1	2	11.62	66.8307	5.69385
A0A0E9ACZ7	Phenolpthiocerol synthesis type-I polyketide synthase PPSA OS=Mycobacterium tuberculosis GN=ppsA PE=4 SV=1 - [A0A0E9ACZ7_MYCTX]	8	6	24	6	5.65	198.821	5.38916
A0A051TJD0	Uncharacterized protein OS=Mycobacterium tuberculosis TKK-01-0051 GN=K875_05544 PE=4 SV=1 - [A0A051TJD0_MYCTX]	8	2	1	2	8.73	37.8703	4.67822
A0A0T9LNB9	DNA translocase FtsK OS=Mycobacterium tuberculosis GN=essC PE=4 SV=1 - [A0A0T9LNB9_MYCTX]	8	3	1	3	5.91	160.374	6.18896
A0A0T9KY47	DNA topoisomerase (ATP-hydrolyzing) OS=Mycobacterium tuberculosis GN=gyrB_1 PE=4 SV=1 - [A0A0T9KY47_MYCTX]	8	2	1	2	3.59	76.8474	7.59131
A0A0T9SES9	30S ribosomal protein S16 OS=Mycobacterium tuberculosis GN=rpsP_2 PE=3 SV=1 - [A0A0T9SES9_MYCTX]	8	2	1	2	15	15.5082	5.43994
A0A0T9G5C9	FMN-dependent alpha-hydroxy acid dehydrogenase OS=Mycobacterium tuberculosis GN=lldD PE=4 SV=1 - [A0A0T9G5C9_MYCTX]	8	3	11	2	17.12	31.4094	8.99756
A0A0T9S6N1	Phosphotransferase system, phosphocarrier protein HPr OS=Mycobacterium tuberculosis GN=ptsH PE=4 SV=1 - [A0A0T9S6N1_MYCTX]	7	2	1	2	32.61	9.45778	4.44971
A0A0T9KJ52	2,3-bisphosphoglycerate-dependent phosphoglycerate mutase OS=Mycobacterium tuberculosis GN=gpmA_1 PE=3 SV=1 - [A0A0T9KJ52_MYCTX]	7	2	2	2	6.93	30.4348	5.47803
R4MA43	Pyruvate-formate lyase OS=Mycobacterium tuberculosis CAS/NITR204 GN=J113_15740 PE=4 SV=1 - [R4MA43_MYCTX]	7	2	3	2	21.49	23.2037	7.1958
A0A0U0T5U4	Uncharacterised protein OS=Mycobacterium tuberculosis GN=ERS007739_01038 PE=4 SV=1 - [A0A0U0T5U4_MYCTX]	7	2	2	2	22.22	7.17276	9.5249
A0A0T9RJJ8	50S ribosomal protein L29 OS=Mycobacterium tuberculosis GN=rpmC_2 PE=3 SV=1 - [A0A0T9RJJ8_MYCTX]	7	2	1	2	37.97	8.88281	9.5249
A0A0T9M9Z0	Putative sensory transduction protein OS=Mycobacterium tuberculosis GN=srrA PE=4 SV=1 - [A0A0T9M9Z0_MYCTX]	7	2	1	2	3.43	24.8875	9.67139
A0A0T9KEP3	ABC transporter-like protein OS=Mycobacterium tuberculosis GN=ERS075342_01426 PE=4 SV=1 - [A0A0T9KEP3_MYCTX]	7	2	1	2	3.82	70.3475	6.99072
A0A0T9Q436	Fumarate hydratase class II OS=Mycobacterium tuberculosis GN=fumC PE=3 SV=1 - [A0A0T9Q436_MYCTX]	7	4	1	4	9.83	49.8887	5.22412
R4LUN2	60 kDa chaperonin OS=Mycobacterium tuberculosis str. Haarlem/NITR202 GN=groL PE=3 SV=1 - [R4LUN2_MYCTX]	6	2	17	2	3.14	56.7287	4.91943
A0A0T9KG76	Phosphoglycerate kinase OS=Mycobacterium tuberculosis GN=pgk PE=3 SV=1 - [A0A0T9KG76_MYCTX]	6	2	1	2	10.13	41.2765	5.17334
A0A0T9PYR5	Fructose-bisphosphate aldolase OS=Mycobacterium tuberculosis GN=fba_2 PE=3 SV=1 - [A0A0T9PYR5_MYCTX]	6	2	1	2	12.9	36.1461	5.021
A0A0T9M4H0	Oligopeptide/dipeptide ABC transporter, ATPase subunit OS=Mycobacterium tuberculosis GN=gsiA_4 PE=3 SV=1 - [A0A0T9M4H0_MYCTX]	6	2	1	2	7.61	67.8505	8.104
A0A0T9SAA5	30S ribosomal protein S18 OS=Mycobacterium tuberculosis GN=rpsR1 PE=3 SV=1 - [A0A0T9SAA5_MYCTX]	6	3	1	3	38.46	8.70798	10.8286
A0A0T9RSR4	50S ribosomal protein L10 OS=Mycobacterium tuberculosis GN=rplJ_2 PE=3 SV=1 - [A0A0T9RSR4_MYCTX]	6	2	2	2	10.23	18.6469	4.89404
A0A0T9N762	Argininosuccinate lyase OS=Mycobacterium tuberculosis GN=argH_1 PE=3 SV=1 - [A0A0T9N762_MYCTX]	6	3	1	3	4.24	51.4165	5.36377
A0A051UKF6	Uncharacterized protein OS=Mycobacterium tuberculosis TKK-01-0051 GN=K875_00248 PE=4 SV=1 - [A0A051UKF6_MYCTX]	6	2	1	2	5.46	37.6919	6.80029
A0A0T9QR78	Superoxide dismutase OS=Mycobacterium tuberculosis GN=sodA_2 PE=3 SV=1 - [A0A0T9QR78_MYCTX]	6	2	1	2	16.43	23.2517	5.37646
A0A0T9N5Z1	Two-component system response regulator OS=Mycobacterium tuberculosis GN=vraR_22 PE=4 SV=1 - [A0A0T9N5Z1_MYCTX]	5	2	1	2	4.59	23.4086	5.63037
A0A0T9PFW0	Uncharacterised protein OS=Mycobacterium tuberculosis GN=ERS075342_08732 PE=4 SV=1 - [A0A0T9PFW0_MYCTX]	5	2	1	2	20.37	5.93925	10.272
A0A0T9RJ86	50S ribosomal protein L22 OS=Mycobacterium tuberculosis GN=rplV_2 PE=3 SV=1 - [A0A0T9RJ86_MYCTX]	5	2	1	2	18.18	13.5533	10.3745
A0A0U0RR97	Carbamoyl-phosphate synthase (glutamine-hydrolyzing) OS=Mycobacterium tuberculosis GN=carB_1 PE=3 SV=1 - [A0A0U0RR97_MYCTX]	5	2	11	2	3.84	42.2295	5.17334
A0A051TTX8	Membrane protein OS=Mycobacterium tuberculosis TKK-01-0051 GN=K875_05363 PE=4 SV=1 - [A0A051TTX8_MYCTX]	5	2	1	2	26.71	28.4476	7.21045
A0A0T9M267	Menaquinone-dependent succinate dehydrogenase/fumarate reductase, flavoprotein subunit OS=Mycobacterium tuberculosis GN=frdA PE=4 SV=1 - [A0A0T9M267_MYCTX]	5	2	1	2	3.1	71.8139	6.31592
R4M395	Uncharacterized protein OS=Mycobacterium tuberculosis str. Haarlem/NITR202 GN=I917_01570 PE=4 SV=1 - [R4M395_MYCTX]	5	2	6	2	9.95	47.2526	10.0376
A0A0T9MXR6	Laccase domain protein OS=Mycobacterium tuberculosis GN=yfiH PE=3 SV=1 - [A0A0T9MXR6_MYCTX]	5	2	1	2	8.1	24.4824	5.42725
A0A0T9B4Z8	Uncharacterised protein OS=Mycobacterium tuberculosis GN=ERS024213_02420 PE=4 SV=1 - [A0A0T9B4Z8_MYCTX]	5	2	2	2	74.58	6.56732	6.49365
A0A0U0R379	FadD27 OS=Mycobacterium tuberculosis GN=ERS007703_01829 PE=4 SV=1 - [A0A0U0R379_MYCTX]	5	2	7	2	21.34	19.3349	8.77783
A0A051TW06	Uncharacterized protein OS=Mycobacterium tuberculosis TKK-01-0051 GN=K875_04075 PE=4 SV=1 - [A0A051TW06_MYCTX]	5	2	1	2	16.15	28.6314	6.0874
A0A0T7LTM7	Enolase Eno OS=Mycobacterium tuberculosis GN=eno PE=4 SV=1 - [A0A0T7LTM7_MYCTX]	5	3	14	3	31.33	16.1901	4.729
A0A051TQU0	Succinate--CoA ligase [ADP-forming] subunit alpha OS=Mycobacterium tuberculosis TKK-01-0051 GN=K875_04866 PE=3 SV=1 - [A0A051TQU0_MYCTX]	5	2	1	2	7.67	30.771	5.16064
A0A051TR36	Transcription-repair-coupling factor OS=Mycobacterium tuberculosis TKK-01-0051 GN=mfd PE=3 SV=1 - [A0A051TR36_MYCTX]	5	2	1	2	4.22	132.836	5.63037
A0A0T9LJI1	Putative transcriptional regulator OS=Mycobacterium tuberculosis GN=brpA_1 PE=4 SV=1 - [A0A0T9LJI1_MYCTX]	5	2	1	2	5.07	50.03	9.86182
A0A0T9N0F4	Elongation factor G OS=Mycobacterium tuberculosis GN=fusA_3 PE=3 SV=1 - [A0A0T9N0F4_MYCTX]	4	3	2	2	5.55	77.5121	5.16064
A0A051UJY0	Protein translocase subunit SecA OS=Mycobacterium tuberculosis TKK-01-0051 GN=secA PE=3 SV=1 - [A0A051UJY0_MYCTX]	4	2	1	2	6.79	105.289	5.23682
A0A0T9LWU8	cAMP-binding protein OS=Mycobacterium tuberculosis GN=crp_2 PE=4 SV=1 - [A0A0T9LWU8_MYCTX]	4	2	1	2	23.5	25.0702	9.39307
A0A0T9L7W4	50S ribosomal protein L1 OS=Mycobacterium tuberculosis GN=rplA PE=3 SV=1 - [A0A0T9L7W4_MYCTX]	4	2	6	2	7.14	25.4785	9.53955
A0A0T9QVJ4	30S ribosomal protein S4 OS=Mycobacterium tuberculosis GN=rpsD_2 PE=3 SV=1 - [A0A0T9QVJ4_MYCTX]	4	3	1	3	14.76	24.115	10.272
A0A051TWU6	Uncharacterized protein OS=Mycobacterium tuberculosis TKK-01-0051 GN=K875_03792 PE=4 SV=1 - [A0A051TWU6_MYCTX]	4	3	1	2	2	237.766	5.32568
A0A051TYZ0	Uncharacterized protein OS=Mycobacterium tuberculosis TKK-01-0051 GN=K875_02802 PE=4 SV=1 - [A0A051TYZ0_MYCTX]	4	2	1	2	11.32	53.0403	8.79248
A0A051U436	Uncharacterized protein OS=Mycobacterium tuberculosis TKK-01-0051 GN=K875_02542 PE=4 SV=1 - [A0A051U436_MYCTX]	4	4	32	3	0.86	881.71	5.32568
A0A0T9LG94	Regulatory protein OS=Mycobacterium tuberculosis GN=ERS075342_03784 PE=4 SV=1 - [A0A0T9LG94_MYCTX]	4	2	1	2	4.06	41.8224	6.60986
A0A0T9MAC1	Aspartyl-tRNA synthetase OS=Mycobacterium tuberculosis GN=aspS_1 PE=3 SV=1 - [A0A0T9MAC1_MYCTX]	4	2	2	2	3.24	64.5656	5.12256
A0A051U5P8	Uncharacterized protein OS=Mycobacterium tuberculosis TKK-01-0051 GN=K875_01885 PE=4 SV=1 - [A0A051U5P8_MYCTX]	4	2	2	2	17.42	29.9053	6.11279
A0A0T9MUZ8	Protein-disulfide isomerase OS=Mycobacterium tuberculosis GN=ERS075342_07270 PE=4 SV=1 - [A0A0T9MUZ8_MYCTX]	4	2	1	2	10.64	28.9268	9.33447
A0A051U588	Uncharacterized protein OS=Mycobacterium tuberculosis TKK-01-0051 GN=K875_01753 PE=4 SV=1 - [A0A051U588_MYCTX]	4	2	1	2	3.32	48.9531	5.99854
A0A051TS34	Fatty-acid-CoA ligase FadD3 OS=Mycobacterium tuberculosis TKK-01-0051 GN=K875_05324 PE=4 SV=1 - [A0A051TS34_MYCTX]	4	2	8	2	7.98	55.2311	5.30029
R4M578	1,4-alpha-glucan branching enzyme GlgB OS=Mycobacterium tuberculosis CAS/NITR204 GN=glgB PE=3 SV=1 - [R4M578_MYCTX]	4	2	7	2	6.43	81.8442	5.73193
A0A1A3P7F6	3-oxoacyl-ACP synthase (Fragment) OS=Mycobacterium tuberculosis GN=A5632_15585 PE=4 SV=1 - [A0A1A3P7F6_MYCTX]	4	3	18	3	1.82	291.741	5.17334
A0A051TYQ9	Uncharacterized protein OS=Mycobacterium tuberculosis TKK-01-0051 GN=K875_04427 PE=4 SV=1 - [A0A051TYQ9_MYCTX]	4	2	1	2	26.76	15.679	5.03369
A0A0T9KPU9	Enoyl-CoA hydratase paaG OS=Mycobacterium tuberculosis GN=fcbB2_1 PE=4 SV=1 - [A0A0T9KPU9_MYCTX]	4	2	1	2	7.17	24.8001	8.646
A0A0T9KTU3	Cell envelope-related function transcriptional attenuator common domain-containing protein OS=Mycobacterium tuberculosis GN=yvhJ_2 PE=4 SV=1 - [A0A0T9KTU3_MYCTX]	4	2	1	2	10.17	52.2435	10.0522
A0A0T9FXQ4	Uncharacterised protein OS=Mycobacterium tuberculosis GN=ERS024213_07119 PE=4 SV=1 - [A0A0T9FXQ4_MYCTX]	4	2	2	2	41.94	6.25012	5.10986
A0A0T9FKW8	Thiol peroxidase OS=Mycobacterium tuberculosis GN=tpx_2 PE=4 SV=1 - [A0A0T9FKW8_MYCTX]	4	2	1	2	31.71	9.33557	4.61475
A0A051UJL4	Uncharacterized protein OS=Mycobacterium tuberculosis TKK-01-0051 GN=K875_00112 PE=4 SV=1 - [A0A051UJL4_MYCTX]	3	2	1	2	7.13	50.0476	7.37158
A0A0T9QA34	GntR family transcriptional regulator OS=Mycobacterium tuberculosis GN=lutR_3 PE=4 SV=1 - [A0A0T9QA34_MYCTX]	3	2	1	2	11.15	32.1993	5.97314
A0A0T9FLE6	Uncharacterised protein OS=Mycobacterium tuberculosis GN=ERS024276_03144 PE=4 SV=1 - [A0A0T9FLE6_MYCTX]	3	2	3	2	7.41	24.326	12.1909
A0A051TRK2	Uncharacterized protein OS=Mycobacterium tuberculosis TKK-01-0051 GN=K875_05110 PE=4 SV=1 - [A0A051TRK2_MYCTX]	3	2	1	2	17.12	15.033	4.99561
A0A0T9F672	Uncharacterised protein OS=Mycobacterium tuberculosis GN=ERS027644_04775 PE=4 SV=1 - [A0A0T9F672_MYCTX]	3	2	9	2	12.84	15.582	8.33838
A0A051U080	Uncharacterized protein OS=Mycobacterium tuberculosis TKK-01-0051 GN=K875_02906 PE=3 SV=1 - [A0A051U080_MYCTX]	3	2	1	2	4.25	44.3398	6.94678
A0A0T9PJW8	Pyruvate/2-oxoglutarate dehydrogenase complex, dihydrolipoamide dehydrogenase component OS=Mycobacterium tuberculosis GN=merA PE=3 SV=1 - [A0A0T9PJW8_MYCTX]	3	2	1	2	4.48	50.2259	5.24951
A0A0T9R870	Inorganic pyrophosphatase OS=Mycobacterium tuberculosis GN=ppa_2 PE=3 SV=1 - [A0A0T9R870_MYCTX]	3	2	1	2	13.66	18.176	4.70361
A0A0T9M6P6	ABC-type multidrug transport system, ATPase and permease component OS=Mycobacterium tuberculosis GN=apxIB PE=4 SV=1 - [A0A0T9M6P6_MYCTX]	3	2	1	2	2.02	74.6709	8.39697
A0A0T9L911	Arginine deiminase OS=Mycobacterium tuberculosis GN=arcA_2 PE=3 SV=1 - [A0A0T9L911_MYCTX]	3	2	1	2	14.9	43.6185	5.30029
A0A0T9LZW3	ATP-dependent helicase dinG-like protein OS=Mycobacterium tuberculosis GN=dinG PE=4 SV=1 - [A0A0T9LZW3_MYCTX]	3	2	1	2	3.86	74.6296	5.30029
O53387	Uncharacterized protein OS=Mycobacterium tuberculosis (strain ATCC 25618 / H37Rv) GN=Rv3337 PE=4 SV=2 - [O53387_MYCTU]	3	2	3	2	26.56	13.2023	10.0083
A0A0T9JXF4	DNA-binding protein, HTH regulator OS=Mycobacterium tuberculosis GN=ERS075342_00116 PE=4 SV=1 - [A0A0T9JXF4_MYCTX]	3	2	1	2	6.5	31.2655	6.97607
A0A0T9R421	Acetolactate synthase OS=Mycobacterium tuberculosis GN=ilvB1_2 PE=3 SV=1 - [A0A0T9R421_MYCTX]	3	2	2	2	9.11	62.6427	5.40186
A0A0U0SL82	Esx conserved component EccA5 OS=Mycobacterium tuberculosis GN=eccA1_1 PE=4 SV=1 - [A0A0U0SL82_MYCTX]	3	2	14	2	14.19	34.7338	5.51611
A0A051U412	DNA polymerase I PolA OS=Mycobacterium tuberculosis TKK-01-0051 GN=K875_02632 PE=3 SV=1 - [A0A051U412_MYCTX]	3	2	7	2	1.88	99.0598	4.99561
A0A0T9LBU8	EmrB/QacA subfamily drug resistance transporter OS=Mycobacterium tuberculosis GN=stp_10 PE=4 SV=1 - [A0A0T9LBU8_MYCTX]	3	2	1	2	9.96	47.5948	10.4771
A0A0T9N6L2	Uncharacterised protein OS=Mycobacterium tuberculosis GN=ERS075342_07979 PE=4 SV=1 - [A0A0T9N6L2_MYCTX]	3	2	1	2	7.09	32.2649	5.94775
A0A0U0S7I3	Transcriptional regulator OS=Mycobacterium tuberculosis GN=moaR1 PE=4 SV=1 - [A0A0U0S7I3_MYCTX]	3	2	7	2	14.21	20.4637	7.50342
A0A0T9LRT2	30S ribosomal protein S8 OS=Mycobacterium tuberculosis GN=rpsH PE=3 SV=1 - [A0A0T9LRT2_MYCTX]	3	2	3	2	6.15	14.1316	9.81787
A0A0T9MRK4	Transcription-repair-coupling factor OS=Mycobacterium tuberculosis GN=mfd PE=3 SV=1 - [A0A0T9MRK4_MYCTX]	3	2	1	2	2.48	80.8606	7.18115
A0A051TT52	Uncharacterized protein OS=Mycobacterium tuberculosis TKK-01-0051 GN=K875_05067 PE=4 SV=1 - [A0A051TT52_MYCTX]	3	2	1	2	8.28	87.6703	5.51611
A0A051TVJ0	Phenyloxazoline synthase MbtB OS=Mycobacterium tuberculosis TKK-01-0051 GN=K875_03796 PE=4 SV=1 - [A0A051TVJ0_MYCTX]	3	2	1	2	5.83	125.386	5.13525
A0A0T9K3J8	Phosphoribosylformylglycinamidine synthase subunit PurL OS=Mycobacterium tuberculosis GN=purL PE=3 SV=1 - [A0A0T9K3J8_MYCTX]	3	2	1	2	3.05	121.155	4.80518
A0A0T9R675	Uncharacterised protein OS=Mycobacterium tuberculosis GN=ERS124361_05621 PE=4 SV=1 - [A0A0T9R675_MYCTX]	3	2	1	2	17.13	31.1388	9.21729
A0A0T9PDT1	Probable ATP-binding protein ABC transporter CydD OS=Mycobacterium tuberculosis GN=cydD_2 PE=4 SV=1 - [A0A0T9PDT1_MYCTX]	3	2	1	2	1.09	163.545	6.3667
A0A0T9BX85	ATP-dependent DNA helicase RecG OS=Mycobacterium tuberculosis GN=recG_2 PE=3 SV=1 - [A0A0T9BX85_MYCTX]	3	2	8	2	5.79	75.2534	6.7417
A0A0T9C1J3	Glutamine-transport ATP-binding protein ABC transporter GLNQ OS=Mycobacterium tuberculosis GN=glnQ PE=4 SV=1 - [A0A0T9C1J3_MYCTX]	3	2	14	2	15.28	32.4732	6.11279
A0A0T9QDG9	FAD linked oxidase-like protein OS=Mycobacterium tuberculosis GN=ERS124361_04933 PE=4 SV=1 - [A0A0T9QDG9_MYCTX]	3	2	2	2	1.55	105.935	6.07471
A0A051UGV8	ESX-2 secretion system protein EccC2 OS=Mycobacterium tuberculosis TKK-01-0051 GN=K875_00376 PE=4 SV=1 - [A0A051UGV8_MYCTX]	3	2	1	2	1.07	154.588	6.37939
A0A0T9EFP4	Uncharacterised protein OS=Mycobacterium tuberculosis GN=ERS027661_03938 PE=4 SV=1 - [A0A0T9EFP4_MYCTX]	3	2	6	2	18.02	22.6464	12.0005
A0A0U0SW92	Uncharacterised protein OS=Mycobacterium tuberculosis GN=ERS007663_03067 PE=4 SV=1 - [A0A0U0SW92_MYCTX]	3	2	2	2	25.85	16.4947	9.29053
A0A0T9B9U8	Ornithine aminotransferase (N-terminus part) rocD1 OS=Mycobacterium tuberculosis GN=rocD PE=4 SV=1 - [A0A0T9B9U8_MYCTX]	3	2	5	2	47.48	14.057	4.7417
A0A0T9SAJ4	Acetate kinase OS=Mycobacterium tuberculosis GN=ackA_2 PE=3 SV=1 - [A0A0T9SAJ4_MYCTX]	3	3	1	3	9.43	28.6616	5.37646
A0A0T9QTJ4	50S ribosomal protein L3 OS=Mycobacterium tuberculosis GN=rplC_2 PE=3 SV=1 - [A0A0T9QTJ4_MYCTX]	3	3	1	3	19.72	23.2704	10.0962
Q8VJC1	Sugar ABC transporter, sugar-binding protein OS=Mycobacterium tuberculosis (strain CDC 1551 / Oshkosh) GN=MT2899 PE=4 SV=1 - [Q8VJC1_MYCTO]	3	2	10	2	10.57	37.366	9.94971
A0A0T9M5M7	Uncharacterised protein OS=Mycobacterium tuberculosis GN=ERS075342_05344 PE=4 SV=1 - [A0A0T9M5M7_MYCTX]	3	2	1	2	5.95	28.0887	8.77783
A0A0T9S3K6	Cys-tRNA(Pro)/Cys-tRNA(Cys) deacylase OS=Mycobacterium tuberculosis GN=ybaK_2 PE=3 SV=1 - [A0A0T9S3K6_MYCTX]	3	2	2	2	30.18	17.8974	8.08936
A0A0T9QZU7	PTS system glucose subfamily transporter subunit IIA OS=Mycobacterium tuberculosis GN=bglF_2 PE=4 SV=1 - [A0A0T9QZU7_MYCTX]	3	2	1	2	6.23	72.4075	5.99854
A0A051TQN3	Uncharacterized protein OS=Mycobacterium tuberculosis TKK-01-0051 GN=K875_04603 PE=4 SV=1 - [A0A051TQN3_MYCTX]	2	2	25	2	2	222.239	5.5542
R4M3B6	Polyketide synthase OS=Mycobacterium tuberculosis str. Haarlem/NITR202 GN=I917_14445 PE=4 SV=1 - [R4M3B6_MYCTX]	2	2	20	2	2.9	111.248	5.2876
A0A0T9N9L0	Transposase and inactivated derivatives OS=Mycobacterium tuberculosis GN=ERS075342_08123 PE=4 SV=1 - [A0A0T9N9L0_MYCTX]	2	2	1	2	8.46	50.8074	9.93506
A0A0T7LG62	DNA primase OS=Mycobacterium tuberculosis GN=dnaG PE=3 SV=1 - [A0A0T7LG62_MYCTX]	2	2	6	2	7.62	69.9505	6.84424
A0A0T7LWF9	Metal cation transporter P-type ATPase CtpV OS=Mycobacterium tuberculosis GN=copA_3 PE=3 SV=1 - [A0A0T7LWF9_MYCTX]	2	2	12	2	6.05	42.9827	9.0415
A0A0T9AW38	Peptidase family M28 OS=Mycobacterium tuberculosis GN=ERS024213_00677 PE=4 SV=1 - [A0A0T9AW38_MYCTX]	2	2	6	2	11.81	39.2814	7.06396
A0A0U0RSB6	Uncharacterized protein OS=Mycobacterium tuberculosis GN=ERS007728_00212 PE=4 SV=1 - [A0A0U0RSB6_MYCTX]	2	2	13	2	18.75	19.4438	6.18896
A0A0T9M3A3	Regulatory protein OS=Mycobacterium tuberculosis GN=ERS075342_05139 PE=4 SV=1 - [A0A0T9M3A3_MYCTX]	2	2	1	2	3.41	67.0019	11.1655
A0A0T9P2I1	ATP synthase subunit b OS=Mycobacterium tuberculosis GN=atpF_2 PE=3 SV=1 - [A0A0T9P2I1_MYCTX]	2	2	1	2	11.35	19.8394	4.76709
A0A0U0QTG4	DNA topoisomerase OS=Mycobacterium tuberculosis GN=topA PE=3 SV=1 - [A0A0U0QTG4_MYCTX]	2	2	19	2	8.04	74.6584	6.53662
A0A0T9PYP4	Uncharacterised protein OS=Mycobacterium tuberculosis GN=ERS124361_04541 PE=4 SV=1 - [A0A0T9PYP4_MYCTX]	2	2	1	2	9.73	58.1241	12.4106
A0A0T9M9N7	Aconitate hydratase OS=Mycobacterium tuberculosis GN=dmdA PE=4 SV=1 - [A0A0T9M9N7_MYCTX]	2	2	1	2	3.98	70.4671	5.8335
R4LVC3	Hydrolase OS=Mycobacterium tuberculosis str. Haarlem/NITR202 GN=I917_04770 PE=4 SV=1 - [R4LVC3_MYCTX]	2	2	11	2	6.28	69.5036	6.88818
A0A0T9BP86	ATP-dependent helicase OS=Mycobacterium tuberculosis GN=lhr PE=4 SV=1 - [A0A0T9BP86_MYCTX]	2	2	7	2	4.18	102.06	6.3667
A0A0T9MZ70	Alcohol dehydrogenase B OS=Mycobacterium tuberculosis GN=ERS075342_07467 PE=3 SV=1 - [A0A0T9MZ70_MYCTX]	2	2	1	2	10.3	39.1479	5.8208
A0A0E7YER8	Acyl-CoA dehydrogenase FadE20 OS=Mycobacterium tuberculosis GN=BN1213_03291 PE=3 SV=1 - [A0A0E7YER8_MYCTX]	2	2	5	2	9.07	42.8176	5.60498
A0A051TYJ0	Uncharacterized protein OS=Mycobacterium tuberculosis TKK-01-0051 GN=K875_02888 PE=4 SV=1 - [A0A051TYJ0_MYCTX]	2	2	3	2	22.33	32.2973	4.99561
A0A0T9K7S3	Protein kinase OS=Mycobacterium tuberculosis GN=afsK_4 PE=4 SV=1 - [A0A0T9K7S3_MYCTX]	2	2	1	2	5.79	62.341	5.30029
A0A0T9PE79	ATP-dependent RNA helicase DeaD OS=Mycobacterium tuberculosis GN=deaD_2 PE=3 SV=1 - [A0A0T9PE79_MYCTX]	2	2	1	2	2.48	84.3887	6.1001
A0A0U0UD65	Transmembrane protein alanine and leucine rich OS=Mycobacterium tuberculosis GN=ERS007731_03975 PE=4 SV=1 - [A0A0U0UD65_MYCTX]	2	2	14	2	9.77	19.5358	7.13721
A0A051U3G9	Uncharacterized protein OS=Mycobacterium tuberculosis TKK-01-0051 GN=K875_02144 PE=4 SV=1 - [A0A051U3G9_MYCTX]	2	2	1	2	7.87	37.2126	9.0708
A0A0T9MZ73	Ferredoxin-dependent glutamate synthase 1 OS=Mycobacterium tuberculosis GN=gltB_1 PE=4 SV=1 - [A0A0T9MZ73_MYCTX]	2	2	1	2	1.9	164.416	5.61768
A0A051TYG7	Uncharacterized protein OS=Mycobacterium tuberculosis TKK-01-0051 GN=K875_02858 PE=4 SV=1 - [A0A051TYG7_MYCTX]	2	2	1	2	7.47	55.4499	6.0874
A0A051UI87	Uncharacterized protein OS=Mycobacterium tuberculosis TKK-01-0051 GN=K875_01481 PE=4 SV=1 - [A0A051UI87_MYCTX]	2	2	6	2	9.93	29.7842	5.69385
A0A0T9L561	Acyl-CoA dehydrogenase domain-containing protein OS=Mycobacterium tuberculosis GN=ERS075342_02905 PE=4 SV=1 - [A0A0T9L561_MYCTX]	2	2	1	2	3.18	76.5107	5.59229
A0A0T9NIU6	Flp pilus assembly protein TadB OS=Mycobacterium tuberculosis GN=ERS124361_02920 PE=4 SV=1 - [A0A0T9NIU6_MYCTX]	2	2	1	2	6.77	33.5282	7.97217
A0A051TVN7	Uncharacterized protein OS=Mycobacterium tuberculosis TKK-01-0051 GN=K875_03988 PE=4 SV=1 - [A0A051TVN7_MYCTX]	2	2	1	2	16.35	47.3468	5.03369
A0A051TSJ4	DNA helicase OS=Mycobacterium tuberculosis TKK-01-0051 GN=K875_04870 PE=3 SV=1 - [A0A051TSJ4_MYCTX]	2	2	1	2	2.71	85.3536	5.30029
A0A0T9KU63	Ribulose bisphosphate carboxylase large chain OS=Mycobacterium tuberculosis GN=cbbL PE=3 SV=1 - [A0A0T9KU63_MYCTX]	2	2	1	2	5.87	52.7364	6.43018
A0A0T9JY96	Putative phenylacetic acid degradation protein PaaE/phenylacetate-CoA oxygenase/reductase, PaaK subunit OS=Mycobacterium tuberculosis GN=hmp_1 PE=4 SV=1 - [A0A0T9JY96_MYCTX]	2	2	1	2	12.01	38.4335	5.36377
A0A0T9KDE5	Acetoacetyl-CoA synthase OS=Mycobacterium tuberculosis GN=acsA_2 PE=4 SV=1 - [A0A0T9KDE5_MYCTX]	2	2	1	2	5.38	70.7687	5.021
A0A0H3LKL2	Probable DNA ligase OS=Mycobacterium tuberculosis (strain ATCC 35801 / TMC 107 / Erdman) GN=ligB PE=3 SV=1 - [A0A0H3LKL2_MYCTE]	2	2	6	2	5.38	53.1162	9.31982
A0A051TNA3	DNA topoisomerase 1 OS=Mycobacterium tuberculosis TKK-01-0051 GN=topA PE=3 SV=1 - [A0A051TNA3_MYCTX]	2	2	1	2	4.03	100.461	6.56592
A0A0T9PEJ7	Thioredoxin OS=Mycobacterium tuberculosis GN=trxA_2 PE=4 SV=1 - [A0A0T9PEJ7_MYCTX]	2	2	1	2	19.2	13.5887	4.50049
A0A051TV48	Uncharacterized protein OS=Mycobacterium tuberculosis TKK-01-0051 GN=K875_03793 PE=4 SV=1 - [A0A051TV48_MYCTX]	2	2	1	2	3.65	106.828	5.56689
A0A1A3PPL3	GMP synthase [glutamine-hydrolyzing] OS=Mycobacterium tuberculosis GN=guaA PE=4 SV=1 - [A0A1A3PPL3_MYCTX]	2	2	14	2	5.5	54.3124	5.70654
A0A0T9L8Q8	MarR family transcriptional regulator OS=Mycobacterium tuberculosis GN=ERS075342_03206 PE=4 SV=1 - [A0A0T9L8Q8_MYCTX]	2	2	1	2	13.73	17.3559	6.94678
A0A0T9DY95	ESX-1 secretion system protein EccA1 OS=Mycobacterium tuberculosis GN=eccA1_1 PE=4 SV=1 - [A0A0T9DY95_MYCTX]	2	2	18	2	13.57	15.6578	4.70361
A0A051TRV4	Uncharacterized protein OS=Mycobacterium tuberculosis TKK-01-0051 GN=K875_04999 PE=4 SV=1 - [A0A051TRV4_MYCTX]	2	2	1	2	16.18	18.9841	4.97021
A0A0T9N0D7	Respiratory nitrate reductase subunit alpha OS=Mycobacterium tuberculosis GN=narZ PE=3 SV=1 - [A0A0T9N0D7_MYCTX]	2	2	1	2	1.46	135.934	6.18896
R4M7L5	Uncharacterized protein OS=Mycobacterium tuberculosis str. Haarlem/NITR202 GN=I917_13085 PE=4 SV=1 - [R4M7L5_MYCTX]	2	2	6	2	6.93	28.8616	9.24658
A0A0T9KJJ6	Transcriptional regulator BlaI OS=Mycobacterium tuberculosis GN=blaI_2 PE=4 SV=1 - [A0A0T9KJJ6_MYCTX]	2	2	1	2	26.72	12.9716	5.57959
A0A0T9RAH2	Uncharacterised protein OS=Mycobacterium tuberculosis GN=ERS124361_05674 PE=4 SV=1 - [A0A0T9RAH2_MYCTX]	2	2	1	2	25.13	22.2074	7.6499
A0A051U9I2	NADH-quinone oxidoreductase OS=Mycobacterium tuberculosis TKK-01-0051 GN=K875_01611 PE=3 SV=1 - [A0A051U9I2_MYCTX]	2	2	7	2	3.49	84.992	5.36377
Accession numbers: from proteome datatases of Mycobacterium [tuberculosis] TKK-01-0051 and Mycobacterium tuberculosis str. Haarlem/NITR202 or Mycobacterium tuberculosis (strain ATCC 25618 / H37Rv)
PSM: peptide-spectral match
Coverage: sequence coverage dvinding number of amino acids from identified peptides vs amino acids of the entire protein sequence

## Sheet: C. MaxQuant-all proteins
C. Proteomic analysis of 115 sputum samples integrated in a single experiment quantifying proteins with the MaxQuant software tool based on LFQ values
						Group	PTB	LTBI	LTBI	Ctl	LTBI	LTBI	LTBI	LTBI	LTBI	LTBI	LTBI	Ctl	LTBI	Ctl	Ctl	Ctl	LTBI	LTBI	LTBI	Ctl	Ctl	LTBI	Ctl	LTBI	Ctl	LTBI	LTBI	LTBI	LTBI	LTBI	LTBI	Ctl	LTBI	Ctl	Ctl	Ctl	LTBI	LTBI	LTBI	LTBI	Ctl	Ctl	Ctl
						Gender	M	F	M	F	F	F	F	F	F	M	M	M	M	M	F	M	F	M	M	M	M	M	M	M	M	F	X	F	M	F	F	F	M	F	M	M	M	F	F	M	F	M	F
						Age	18	45	43	47	48	35	21	20	35	43	18	56	21	55	34	50	35	55	25	30	20	60	16	33	40	44		46	40	33	36	45	20	57	30	59	65	39	52	50		25	35
Protein IDs	Majority protein IDs	Protein names	Gene names	Score	Intensity	MS/MS Count	AJ0012	AKC001	AKC003	AKC005	AKC006	AKC007	ALC001	ARB042	ARB043	ARB044	ARB046	ARB049	ARB052	ARC001	ARC003	ARC006	ARC008	ARC010	BES009	BES010	BES011	BES012	BES015	BES016	DM046	DM010	DM022	DM023	DM024	DM047	DM048	DM050	DM051	GUBC004	LOC021	LOC003	LOC007	LOC008	LOC011	LOC016	LOC017	LOC020	MFC001
A0M8Q6	A0M8Q6	Ig lambda-7 chain C region	IGLC7	24.011	984030000	58	0	0	0	546550	2148000	0	0	1712040	0	0	0	0	0	5521700	0	0	0	0	0	0	0	0	0	516100	0	0	0	0	0	0	0	1891650	0	0	5159000	0	778700	0	0	0	0	0	0
A6NJ16	A6NJ16	Putative V-set and immunoglobulin domain-containing-like protein IGHV4OR15-8	IGHV4OR15-8	2.3502	3918900000	79	0	0	850895	0	4045150	0	0	0	0	7205900	0	0	0	1603650	0	1088000	0	0	0	0	0	0	0	4392200	0	6917000	0	0	0	0	0	0	0	3827850	0	0	3254250	0	0	0	9549000	0	0
A8K2U0	A8K2U0	Alpha-2-macroglobulin-like protein 1	A2ML1	323.31	23911000000	1272	12825000	63814500	0	22301000	0	5460900	30916500	52322000	0	81432500	3843350	33914500	0	58938000	63362500	0	5564500	975350	16456500	0	1576600	4439550	53608000	60563000	0	5649500	19567500	4411700	13242500	29323500	34275000	2161400	5333050	12293600	61600500	38654500	30475500	0	25401500	0	0	45306000	3451600
A8K7I4	A8K7I4	Calcium-activated chloride channel regulator 1	CLCA1	11.88	107680000	9	0	9972300	0	0	0	0	0	0	0	0	0	0	0	0	0	0	0	0	0	0	0	0	0	0	0	0	0	0	0	0	0	0	0	0	0	0	0	0	0	0	0	0	0
B9A064;P0CG04	B9A064;P0CG04	Immunoglobulin lambda-like polypeptide 5;Ig lambda-1 chain C regions	IGLL5;IGLC1	74.428	39803000000	763	0	34025000	66492700	7921400	10286500	0	0	11479000	0	73022500	0	0	0	23070500	27306000	21232500	0	0	0	0	8372000	0	0	36377000	0	15839000	15725500	140195000	8395500	3040550	5981500	26456500	4218250	36122500	95804000	0	34930500	0	0	0	0	9005000	0
K7EJ46	K7EJ46	Small integral membrane protein 22	SMIM22	87.891	0	0	0	0	0	0	0	0	0	0	0	0	0	0	0	0	0	0	0	0	0	0	0	0	0	0	0	0	0	0	0	0	0	0	0	0	0	0	0	0	0	0	0	0	0
O00160;Q12965	O00160	Unconventional myosin-If	MYO1F	18.584	922260000	55	0	0	0	0	0	0	0	0	0	0	0	2760200	0	0	0	0	0	0	638100	0	0	0	4231200	0	0	0	0	0	0	0	0	0	0	0	334640	0	0	0	4107700	0	0	0	0
O00182	O00182	Galectin-9	LGALS9	2.2009	0	1	0	0	0	0	0	0	0	0	0	0	0	0	0	0	0	0	0	0	0	0	0	0	0	0	0	0	0	0	0	0	0	0	0	0	0	0	0	0	0	0	0	0	0
O00299	O00299	Chloride intracellular channel protein 1	CLIC1	36.612	5085500000	204	0	2680100	1844550	4144800	5025000	0	0	0	0	3853600	0	4641250	0	6529850	0	0	0	0	0	0	1065000	0	3762050	3637900	0	4215500	1602750	4558100	0	3769450	0	6800450	0	0	3230150	11296000	4193550	0	7935900	0	4599800	0	0
O00303	O00303	Eukaryotic translation initiation factor 3 subunit F	EIF3F	2.2774	41784000	6	0	0	0	0	0	0	0	775405	0	0	0	0	0	0	0	0	0	0	0	0	0	0	0	0	0	0	0	0	0	465760	564000	0	0	0	0	0	0	0	0	0	0	0	0
O00391	O00391	Sulfhydryl oxidase 1	QSOX1	230.46	7796200000	501	0	5235800	1818000	5484500	6868800	8884500	0	3983150	0	2438100	0	0	0	38031500	4708650	0	0	2795550	10909000	0	8682500	0	8950450	9649550	0	2999450	5499600	7323950	10451500	2911900	2755300	26845000	6007000	7773850	2893900	0	6928100	6480000	3477700	0	19281500	5416050	0
O00410	O00410	Importin-5	IPO5	4.3101	24835000	3	0	0	0	0	0	0	0	0	0	0	0	0	0	0	0	0	0	0	0	0	0	0	0	0	0	0	0	0	0	624950	807700	0	0	0	0	0	0	0	0	0	0	0	0
O00560	O00560	Syntenin-1	SDCBP	59.323	531250000	54	0	0	0	0	0	0	0	0	0	0	0	0	0	1121950	0	0	0	0	0	0	0	0	0	0	0	1050550	0	0	0	0	0	568750	0	0	568050	0	0	0	0	0	0	0	0
O00571;O15523	O00571	ATP-dependent RNA helicase DDX3X	DDX3X	5.9437	154680000	27	0	0	0	0	0	0	0	0	0	0	0	0	0	2077450	392635	0	0	0	0	0	0	0	0	296950	0	0	0	0	0	0	0	0	0	0	0	0	0	0	0	0	0	0	0
O00584	O00584	Ribonuclease T2	RNASET2	13.161	2401200000	122	0	0	0	1279850	0	4568550	0	0	0	0	0	12318000	0	2984100	8933300	0	0	0	8465000	0	0	0	6122000	0	0	0	2566650	0	0	0	0	2042700	0	2932500	1594700	0	625750	0	7295650	0	0	0	0
O00602	O00602	Ficolin-1	FCN1	5.6235	42309000	4	0	0	0	0	0	0	0	0	0	0	0	0	0	0	0	0	0	0	0	0	0	0	0	0	0	0	0	0	0	0	0	0	0	0	0	2899950	0	0	0	0	0	0	0
O00629	O00629	Importin subunit alpha-3	KPNA4	4.379	21377000	7	0	544800	0	199485	0	0	0	0	0	0	0	0	0	0	0	0	0	0	0	0	0	0	0	0	0	0	0	0	0	0	491500	0	0	0	0	0	0	0	0	0	0	0	0
O00748	O00748	Cocaine esterase	CES2	10.499	100330000	5	0	0	0	0	0	0	0	0	0	0	0	0	0	0	0	0	0	0	0	0	0	0	6043450	0	0	0	0	0	0	0	0	0	0	0	0	0	0	0	0	0	0	0	0
O00754	O00754	Lysosomal alpha-mannosidase;Lysosomal alpha-mannosidase A peptide;Lysosomal alpha-mannosidase B peptide	MAN2B1	6.0705	115120000	9	0	0	0	0	0	0	0	0	0	0	0	0	0	0	0	0	0	0	0	0	0	0	0	0	0	0	0	0	0	0	0	0	0	0	0	0	0	0	0	0	0	0	0
O00764	O00764	Pyridoxal kinase	PDXK	25.422	205420000	2	0	0	0	0	0	0	0	0	0	0	0	0	0	0	0	0	0	0	0	0	0	0	0	0	0	0	0	0	0	0	0	0	0	0	0	0	0	0	0	0	0	0	0
O14672	O14672	Disintegrin and metalloproteinase domain-containing protein 10	ADAM10	5.7632	0	2	0	0	0	0	0	0	0	0	0	0	0	0	0	0	0	0	0	0	0	0	0	0	0	0	0	0	0	0	0	0	0	0	0	0	0	0	0	0	0	0	0	0	0
O14745	O14745	Na(+)/H(+) exchange regulatory cofactor NHE-RF1	SLC9A3R1	8.2735	177370000	30	0	0	0	0	0	0	0	0	0	0	0	0	0	0	0	0	0	0	0	0	0	0	0	0	0	0	0	0	0	0	0	0	0	0	0	0	0	0	0	0	0	0	0
O14773	O14773	Tripeptidyl-peptidase 1	TPP1	9.7634	328950000	25	0	0	0	0	0	2055750	0	0	0	0	0	7908500	0	0	0	0	0	0	2981900	0	0	0	3662600	0	0	0	0	0	0	0	0	0	0	0	1099355	0	0	0	0	0	0	3766900	0
O14818;Q8TAA3	O14818;Q8TAA3	Proteasome subunit alpha type-7;Proteasome subunit alpha type-7-like	PSMA7;PSMA8	15.567	972440000	72	0	0	0	0	0	0	0	0	0	3725200	0	0	0	0	0	0	0	0	0	0	0	0	0	0	0	6586100	0	0	0	0	0	1679100	0	0	0	0	0	0	0	0	0	0	0
P19105;O14950;P24844	P19105;O14950;P24844	Myosin regulatory light chain 12A;Myosin regulatory light chain 12B;Myosin regulatory light polypeptide 9	MYL12A;MYL12B;MYL9	85.512	2925400000	189	5473000	1679550	0	4421550	10575500	0	0	3663150	0	1949400	0	0	0	4192000	5865550	0	0	0	0	0	0	0	0	2199350	0	0	4094900	0	8103000	6105850	9282200	6003600	3192150	0	1593550	7104350	1510350	0	0	0	0	0	0
O14964	O14964	Hepatocyte growth factor-regulated tyrosine kinase substrate	HGS	2.3878	25131000	5	0	0	0	0	0	0	0	0	0	0	0	0	0	0	0	0	0	0	0	0	0	0	0	0	0	0	0	0	0	0	0	0	0	0	0	0	0	0	0	0	0	0	0
O14976	O14976	Cyclin-G-associated kinase	GAK	12.925	7841500	1	0	0	0	0	0	0	0	0	0	0	0	0	0	0	0	0	0	0	0	0	0	0	0	0	0	0	0	0	0	0	0	0	0	0	0	0	0	0	0	0	0	0	0
O14983	O14983	Sarcoplasmic/endoplasmic reticulum calcium ATPase 1	ATP2A1	5.5942	66587000	5	0	0	0	0	0	0	0	0	0	0	0	0	0	0	0	0	0	0	0	0	0	0	0	0	0	0	0	0	0	0	0	0	0	0	0	0	0	0	0	0	0	0	0
O15143	O15143	Actin-related protein 2/3 complex subunit 1B	ARPC1B	9.8243	1316300000	51	0	0	968250	0	0	0	0	0	0	0	0	0	0	0	0	0	0	0	0	0	0	0	0	0	0	0	0	0	0	0	0	0	0	0	696350	0	0	0	4080450	0	0	0	0
O15144	O15144	Actin-related protein 2/3 complex subunit 2	ARPC2	16.1	831470000	45	2125650	0	0	1179100	0	0	0	1100750	0	1521800	0	2629650	0	3072300	0	0	0	0	0	0	0	0	4993000	0	0	1404000	0	0	0	0	0	429500	0	0	972200	0	709100	0	0	0	0	1708300	0
O15145	O15145	Actin-related protein 2/3 complex subunit 3	ARPC3	7.3613	1135300000	77	0	0	914500	2666950	0	17932000	11630000	1085500	0	0	0	0	0	6616650	5959050	0	0	0	0	0	0	12427500	0	2834300	0	0	2474100	0	7692850	0	5045600	1026845	0	0	0	0	0	0	0	0	0	0	0
O15162	O15162	Phospholipid scramblase 1	PLSCR1	71.847	992450000	17	0	0	0	0	0	0	0	0	0	0	0	0	0	0	0	0	0	3901900	0	0	0	0	0	0	0	0	0	0	0	0	0	0	0	0	0	0	0	0	0	0	0	0	0
O15231	O15231	Zinc finger protein 185	ZNF185	4.4096	189250000	9	0	0	0	0	0	0	0	0	0	3031600	0	0	0	0	0	0	0	0	0	0	0	0	0	2206500	0	0	0	0	0	0	0	0	0	0	0	0	0	0	0	0	0	0	0
O15260	O15260	Surfeit locus protein 4	SURF4	3.4199	332440000	30	0	0	0	0	0	0	0	0	0	0	0	1272050	0	0	246025	0	0	0	1168500	0	0	0	2050950	0	0	569600	0	0	0	0	0	0	0	0	0	0	0	0	0	0	0	0	0
O15335	O15335	Chondroadherin	CHAD	27.811	1812900000	144	0	0	0	4069950	0	0	10587500	4553350	0	294745	0	2411450	12378000	10143450	0	0	0	0	0	0	0	0	0	6117000	0	0	0	0	0	0	0	995200	0	3178950	3159000	0	991100	0	8311200	0	0	1599200	0
O15511	O15511	Actin-related protein 2/3 complex subunit 5	ARPC5	6.5601	2459800000	94	0	0	0	0	0	0	0	0	0	7245700	0	2285050	4943300	6090000	0	0	0	0	0	23243000	0	0	0	2376500	0	2974500	0	0	0	0	0	1215250	0	0	2984700	0	2875700	0	4459800	10713000	2521850	0	37886500
O15533	O15533	Tapasin	TAPBP	6.0671	683530000	16	0	0	0	806850	0	0	0	0	0	0	0	0	0	0	0	0	0	0	0	0	0	0	0	0	0	0	0	0	0	0	0	0	0	0	0	0	0	0	0	0	0	0	0
O43240	O43240	Kallikrein-10	KLK10	10.587	1781300000	84	0	9099100	0	0	0	0	0	3630500	0	2901100	0	0	0	0	0	0	0	0	0	6979300	0	0	0	12726900	0	0	6191500	0	1385250	3790100	0	0	0	0	24315500	3410050	7076550	0	7413000	0	0	0	5585000
O43390	O43390	Heterogeneous nuclear ribonucleoprotein R	HNRNPR	2.7493	110400000	10	0	0	0	0	0	2881600	0	0	0	0	0	0	0	0	0	0	0	0	0	0	0	0	0	0	0	0	0	0	0	0	0	0	0	0	0	0	0	0	0	0	0	0	0
O43451;P14410	O43451	Maltase-glucoamylase, intestinal;Maltase;Glucoamylase	MGAM	68.403	2681800000	191	0	907650	0	0	0	0	0	0	0	1072435	0	0	0	1093550	979000	0	0	0	17423000	0	0	0	3092750	0	0	1726500	0	0	0	0	0	0	792550	2579200	0	8358600	0	5105500	0	0	0	0	0
O43490	O43490	Prominin-1	PROM1	317.81	692410000	43	0	0	0	0	0	0	0	0	0	0	0	0	0	2031150	2529450	0	0	0	0	0	3624550	0	0	0	0	0	0	0	1491100	0	0	0	0	0	0	0	4775300	0	0	0	0	4587300	0
O43653	O43653	Prostate stem cell antigen	PSCA	26.064	795600000	45	0	2281850	0	0	6138600	0	0	0	0	0	0	0	0	12998500	0	0	0	0	0	0	0	0	0	0	0	0	0	0	0	0	0	2797350	0	0	0	0	2098600	0	0	0	0	0	0
O43707	O43707	Alpha-actinin-4	ACTN4	323.31	6626000000	303	7619000	13159000	0	6401900	2984050	8965700	0	4566450	0	5132850	19293500	4636750	0	6736350	12574150	0	5293000	0	9648650	0	0	5078000	36985500	3731050	0	7753600	2354600	0	0	4588800	10152800	1094200	0	4407150	6890400	3401550	2538150	10369500	4190000	0	0	983700	0
O43760	O43760	Synaptogyrin-2	SYNGR2	2.2665	632880000	21	0	0	0	0	0	0	0	0	0	0	0	0	0	0	0	0	0	0	0	0	0	0	0	0	0	3180150	0	0	0	0	0	0	0	0	0	0	0	0	0	0	0	0	0
O43852	O43852	Calumenin	CALU	2.8577	64365000	3	0	0	0	0	0	0	0	0	0	0	0	0	0	0	0	0	0	0	0	0	0	0	0	0	0	0	0	0	614350	0	0	684400	0	0	0	0	0	0	0	0	0	0	0
O43866	O43866	CD5 antigen-like	CD5L	38.869	3162300000	114	0	0	0	0	0	0	0	0	0	1140100	0	0	0	0	0	0	0	0	0	0	0	0	0	0	0	0	0	0	0	0	0	0	0	3879800	0	0	0	0	0	0	0	0	0
O60218;C9JRZ8	O60218	Aldo-keto reductase family 1 member B10	AKR1B10	9.8407	682260000	28	0	0	0	0	0	0	0	0	0	2805950	0	0	0	0	0	0	0	0	0	0	0	0	0	5493250	0	0	0	0	0	1869800	1217850	0	0	0	9513900	17154500	0	0	0	0	0	0	0
O60234;P60983	O60234	Glia maturation factor gamma	GMFG	6.0422	142800000	10	0	0	0	0	0	0	0	0	0	0	0	0	0	0	0	0	0	0	0	0	0	0	0	0	0	0	0	0	0	0	0	0	0	0	0	0	0	0	0	0	0	0	0
O60235	O60235	Transmembrane protease serine 11D;Transmembrane protease serine 11D non-catalytic chain	TMPRSS11D	17.208	2583900000	85	0	10393500	0	2743550	0	8635500	7669000	4965100	0	0	0	0	0	3206600	0	0	0	0	0	0	0	0	0	2604400	0	9958950	5673500	0	0	0	0	1478200	0	0	2056850	13574500	4853800	0	0	0	0	0	0
O60437	O60437	Periplakin	PPL	183.54	4053000000	332	14877000	7845300	0	941425	0	8068150	0	10251350	0	5061650	0	10795800	0	6992450	7285400	0	3778200	0	11222500	0	0	11703500	45545000	19865000	0	0	4938400	4405800	2573550	13196500	18764000	0	5486350	0	27512500	11740250	1699150	0	0	0	0	0	0
O60610	O60610	Protein diaphanous homolog 1	DIAPH1	2.4818	54780000	4	0	0	0	0	0	0	0	0	0	0	0	0	0	0	0	0	0	0	0	0	0	0	4861550	0	0	0	0	0	0	0	0	0	0	0	0	0	0	0	0	0	0	0	0
O60635	O60635	Tetraspanin-1	TSPAN1	81.154	34066000	4	0	0	0	0	0	0	0	0	0	0	0	0	0	0	0	0	0	0	0	0	0	0	0	0	0	0	0	0	0	0	0	0	0	0	0	0	1706100	0	0	0	0	0	0
Q13492;O60641	Q13492;O60641	Phosphatidylinositol-binding clathrin assembly protein;Clathrin coat assembly protein AP180	PICALM;SNAP91	2.8538	186830000	15	0	0	0	0	0	0	0	0	0	0	0	2041300	0	374305	0	0	0	0	4834750	0	0	0	1307700	0	0	0	0	0	0	0	0	0	0	0	0	1893050	0	0	0	0	0	0	0
O60664	O60664	Perilipin-3	PLIN3	15.763	63795000	21	0	0	0	551595	0	0	0	0	0	0	0	0	0	0	0	0	0	0	0	0	0	0	0	0	0	0	0	0	0	0	0	0	0	0	0	0	0	0	0	0	0	635045	0
O60784	O60784	Target of Myb protein 1	TOM1	8.6208	72706000	7	0	0	0	0	0	0	0	173125	0	0	0	0	0	0	0	0	0	0	0	0	0	0	4504450	621860	0	0	0	0	0	0	0	0	0	0	0	0	0	0	0	0	0	95020	0
Q99879;Q99877;Q93079;Q5QNW6;P62807;P58876;O60814;Q99880;P57053	Q99879;Q99877;Q93079;Q5QNW6;P62807;P58876;O60814;Q99880;P57053	Histone H2B type 1-M;Histone H2B type 1-N;Histone H2B type 1-H;Histone H2B type 2-F;Histone H2B type 1-C/E/F/G/I	HIST1H2BM;HIST1H2BN;HIST1H2BH;HIST2H2BF;HIST1H2BC;HIST1H2BD;HIST1H2BK;HIST1H2BL;H2BFS	193.2	158670000000	2337	5452000	65259000	24815500	102163500	264715000	0	0	122832000	12801500	409385000	0	4183400	15955000	21972500	171675000	0	0	1951700	0	0	57316000	0	131610	114332000	13582500	241845000	147080000	99410000	157940000	122150000	151405000	141435000	24172000	671000	132245000	0	115010000	61990000	5381000	109204000	130465000	42659000	859900000
O60888	O60888	Protein CutA	CUTA	45.062	76111000	6	0	0	0	0	0	0	0	0	0	0	0	0	0	1367350	0	0	0	0	0	0	0	0	0	0	0	0	0	0	0	0	0	0	0	0	617550	0	0	0	0	0	0	0	0
O75015	O75015	Low affinity immunoglobulin gamma Fc region receptor III-B	FCGR3B	12.716	458420000	35	0	0	0	0	0	0	0	0	0	0	0	0	0	1673600	0	0	0	0	6639500	0	0	0	1313850	0	0	0	0	0	0	0	0	0	0	1007230	0	0	0	0	0	0	0	0	0
O75083	O75083	WD repeat-containing protein 1	WDR1	21.007	5125700000	223	10940500	5559300	0	4283400	1659950	7421000	0	1159000	0	1998050	5600500	4884500	0	909750	584900	0	0	3079500	12154800	0	0	0	4831900	3305050	0	8978700	5203500	0	1114350	2864750	1999650	1581400	0	0	3284700	10114500	4335900	10238000	6235500	0	9710350	0	0
O75131;Q8IYJ1;Q96A23;O95741;Q86YQ8;Q9HCH3;Q9UBL6	O75131	Copine-3	CPNE3	121.24	4615200000	269	0	2194750	0	1440300	0	0	0	0	0	3007500	0	0	0	4696550	6099300	0	0	0	0	0	0	0	0	746450	0	13811100	2074850	0	0	0	0	0	0	14658500	1458250	0	0	7884500	0	0	0	0	0
O75340	O75340	Programmed cell death protein 6	PDCD6	4.7621	814170000	20	0	0	0	0	0	0	0	0	0	2619450	0	0	0	0	0	0	0	0	0	0	0	0	0	0	0	0	0	0	0	0	0	0	0	0	0	0	0	3888250	4792200	0	0	0	0
O75351;Q9UN37;Q6PIW4	O75351;Q9UN37;Q6PIW4	Vacuolar protein sorting-associated protein 4B;Vacuolar protein sorting-associated protein 4A;Fidgetin-like protein 1	VPS4B;VPS4A;FIGNL1	2.6941	45711000	12	0	0	0	0	0	0	0	0	0	0	0	0	0	0	0	0	0	0	0	0	0	0	0	625780	0	0	0	0	0	0	0	0	0	0	744820	0	0	0	0	0	0	0	0
O75367;Q9P0M6	O75367	Core histone macro-H2A.1	H2AFY	34.575	4024900000	195	0	3260700	26321500	7217750	0	0	0	0	0	10403300	2954350	0	0	3138450	0	0	0	0	0	0	0	0	28750500	3446200	9399000	0	7885100	5253900	0	0	0	2160300	0	4462000	10735150	0	4096200	0	10914000	0	0	0	55219000
O75368	O75368	SH3 domain-binding glutamic acid-rich-like protein	SH3BGRL	18.72	2859500000	121	0	4717850	0	632000	0	6912000	0	0	0	2259300	8945000	9519050	0	2662950	3808000	0	0	0	3812550	0	0	0	24909500	0	0	5412600	0	0	2561800	0	0	0	0	3428000	0	4251400	0	15618500	3244150	0	0	0	0
O75390	O75390	Citrate synthase, mitochondrial	CS	13.046	1308600000	76	0	3104250	0	1911300	0	0	0	0	0	0	0	0	0	0	0	0	0	0	3343800	0	0	0	0	0	0	4266050	2685500	0	0	0	0	0	0	0	531200	0	0	0	0	0	2416650	0	0
O75506	O75506	Heat shock factor-binding protein 1	HSBP1	100.43	94592000	9	0	0	0	628625	0	0	0	0	0	0	0	0	0	0	0	0	0	0	345975	0	0	0	0	1856350	0	0	811900	0	0	1080635	0	0	0	0	0	0	0	0	0	0	0	0	0
O75556	O75556	Mammaglobin-B	SCGB2A1	108.33	15627000000	121	0	14776350	0	3781450	77332250	2966850	0	9545200	0	22743500	0	0	0	43845500	38345500	0	0	0	0	0	0	14580500	0	23371000	10985500	0	3013650	7647000	0	7448500	3810700	0	0	0	321550000	0	11356500	0	34709000	0	0	0	0
O75563	O75563	Src kinase-associated phosphoprotein 2	SKAP2	4.4336	45521000	6	0	0	0	0	0	0	0	0	0	0	0	0	0	0	0	2827550	0	0	0	0	0	0	0	0	0	0	0	0	0	0	0	0	0	0	0	0	0	0	0	0	0	0	0
O75594	O75594	Peptidoglycan recognition protein 1	PGLYRP1	323.31	6267500000	98	0	0	11606000	0	0	13102000	0	0	0	7871750	0	0	0	6262000	3512900	11110500	0	0	0	0	0	0	0	0	0	10057850	0	0	0	0	0	0	0	2104100	0	0	0	0	0	0	0	0	0
O75608	O75608	Acyl-protein thioesterase 1	LYPLA1	4.3551	101710000	16	0	0	0	0	0	2178350	0	356650	0	0	0	999800	0	0	0	0	0	0	1857750	0	0	0	0	0	0	0	0	0	0	0	0	0	0	0	0	0	0	0	0	0	0	0	0
O75629	O75629	Protein CREG1	CREG1	7.8993	50480000	15	0	0	0	0	0	0	0	0	0	0	0	0	0	1075050	0	0	0	0	0	0	0	0	0	0	0	0	0	0	0	0	0	0	0	643675	0	0	0	0	0	0	0	0	0
O75695	O75695	Protein XRP2	RP2	6.2677	207290000	39	0	0	0	608550	0	0	0	0	0	0	0	0	0	0	0	0	0	0	0	0	0	0	0	0	0	559800	0	0	0	0	0	0	0	0	154730	0	352495	0	897150	0	0	0	0
O75787	O75787	Renin receptor	ATP6AP2	2.2735	277030000	12	0	0	0	0	0	0	0	0	0	0	0	0	0	0	0	0	0	0	0	0	0	0	0	0	0	5252250	0	0	0	0	0	0	0	0	0	0	0	0	0	0	4201100	0	0
O75923	O75923	Dysferlin	DYSF	28.72	1419500000	62	0	0	0	0	0	0	0	0	0	0	0	0	0	0	2170250	0	0	5879000	0	0	0	0	0	0	0	1703900	0	0	0	0	0	0	0	0	0	0	0	0	0	0	0	0	0
O75955	O75955	Flotillin-1	FLOT1	7.0381	250810000	17	0	0	0	0	0	0	0	0	0	0	0	0	0	0	0	0	0	0	0	0	0	0	0	0	0	0	0	0	0	0	0	0	0	0	0	0	0	0	0	0	0	0	0
O75964	O75964	ATP synthase subunit g, mitochondrial	ATP5L	40.038	256850000	8	0	0	0	0	0	0	0	0	0	0	0	0	0	0	0	0	0	0	0	0	0	0	0	954850	0	0	0	0	0	0	0	0	0	0	0	0	0	0	0	0	0	0	0
O76003	O76003	Glutaredoxin-3	GLRX3	70.504	146600000	10	0	0	0	0	0	0	0	0	0	0	0	0	0	0	0	0	0	0	0	0	705950	0	0	1225600	0	0	0	0	0	438205	3882350	1082940	0	0	0	0	0	0	0	0	0	0	0
O94905	O94905	Erlin-2	ERLIN2	16.764	524370000	34	0	0	0	0	0	0	0	0	0	0	0	0	0	0	1289100	0	0	0	0	0	0	0	0	0	0	1555700	0	0	0	0	0	0	0	0	0	0	0	0	0	0	0	0	0
Q00535;P06493;P24941;P11802;Q00526;Q00534;P50750;Q96Q40;O94921;Q07002;Q00536;Q00537;Q9NYV4;Q14004	Q00535;P06493;P24941;P11802;Q00526;Q00534;P50750;Q96Q40;O94921;Q07002;Q00536;Q00537;Q9NYV4;Q14004	Cyclin-dependent-like kinase 5;Cyclin-dependent kinase 1;Cyclin-dependent kinase 2;Cyclin-dependent kinase 4	CDK5;CDK1;CDK2;CDK4;CDK3;CDK6;CDK9;CDK15;CDK14;CDK18;CDK16;CDK17;CDK12;CDK13	14.962	730030000	62	0	0	0	0	0	0	0	0	0	969300	0	2592900	0	0	0	0	0	0	0	0	0	0	0	0	0	0	0	0	0	0	0	0	0	0	0	0	0	0	0	0	0	0	0
O95171	O95171	Sciellin	SCEL	24.954	1202100000	83	7356800	0	0	0	0	0	0	1885650	0	26283500	0	0	0	0	0	0	0	0	0	0	0	24879000	0	7985900	0	0	0	1128200	4045700	2059150	4414350	0	0	0	3667100	6858500	772050	0	0	0	0	0	0
O95274	O95274	Ly6/PLAUR domain-containing protein 3	LYPD3	42.51	231900000	11	0	0	0	374115	0	0	0	0	0	428385	0	0	0	0	1384800	0	0	0	0	0	0	0	0	0	0	0	0	2796500	0	2052200	1518500	0	0	0	710650	0	0	0	0	0	0	0	0
O95336	O95336	6-phosphogluconolactonase	PGLS	25.938	694730000	37	0	0	0	580300	0	0	0	0	0	0	0	1934300	0	0	0	0	0	0	1485000	0	0	0	6492300	428320	0	0	0	0	0	0	0	0	0	0	0	8221300	0	7346500	0	0	0	0	0
O95395	O95395	Beta-1,3-galactosyl-O-glycosyl-glycoprotein beta-1,6-N-acetylglucosaminyltransferase 3	GCNT3	3.9804	40276000	8	0	0	0	0	0	0	0	0	0	0	0	0	0	0	0	0	0	0	0	0	909300	0	0	0	0	0	0	0	257205	0	0	0	0	0	0	0	0	0	0	0	0	0	0
O95436	O95436	Sodium-dependent phosphate transport protein 2B	SLC34A2	16.98	476350000	37	0	1158750	0	0	0	0	0	0	0	0	0	0	0	521000	0	0	0	1523450	0	0	0	0	0	0	0	1872850	0	0	0	0	0	723000	0	0	417440	0	1623800	0	0	0	0	0	0
O95479	O95479	GDH/6PGL endoplasmic bifunctional protein;Glucose 1-dehydrogenase;6-phosphogluconolactonase	H6PD	9.4777	231520000	19	0	0	0	0	0	0	0	0	0	0	0	0	0	0	0	0	0	0	0	0	0	0	0	0	0	0	0	0	0	0	0	0	0	0	0	0	0	0	0	0	0	0	0
O95498	O95498	Vascular non-inflammatory molecule 2	VNN2	6.6797	1135500000	27	0	0	0	0	0	0	0	0	0	0	0	7421000	0	0	0	0	0	0	0	0	0	0	0	0	0	0	0	0	0	0	0	0	0	592700	0	0	0	0	0	0	0	0	0
O95571	O95571	Persulfide dioxygenase ETHE1, mitochondrial	ETHE1	9.3823	151310000	34	0	0	0	0	0	0	0	0	0	378620	0	0	0	0	0	0	0	0	0	0	0	0	0	0	0	1087600	0	0	0	0	0	0	0	0	0	0	0	0	0	0	0	0	0
O95747	O95747	Serine/threonine-protein kinase OSR1	OXSR1	2.2056	35104000	8	0	0	0	0	0	0	0	0	0	0	0	0	0	0	0	0	0	0	0	0	0	0	0	0	0	0	0	0	0	0	0	0	0	0	0	0	0	0	0	0	0	0	0
O95833	O95833	Chloride intracellular channel protein 3	CLIC3	64.255	293320000	30	0	0	0	950050	0	0	4371750	400080	0	2215500	0	0	0	0	0	0	0	0	0	0	0	0	0	0	0	0	0	0	2370450	1315300	4952850	0	983700	0	305590	0	2478900	0	0	0	0	0	0
O95867	O95867	Lymphocyte antigen 6 complex locus protein G6c	LY6G6C	3.701	95663000	4	0	0	0	0	0	0	0	0	0	883750	0	0	0	0	0	0	0	0	0	0	0	0	0	0	0	0	0	0	0	0	0	0	0	0	0	0	0	0	0	0	0	0	0
O95968	O95968	Secretoglobin family 1D member 1	SCGB1D1	25.108	12236000000	95	0	0	0	891100	102317500	0	0	0	0	3134350	0	0	0	2978850	27048500	0	0	0	0	0	0	0	0	0	0	0	3476800	7784000	0	10141050	2983400	0	0	0	346285000	0	2403800	0	20192500	0	0	0	0
O95994;Q8TD06	O95994;Q8TD06	Anterior gradient protein 2 homolog;Anterior gradient protein 3 homolog	AGR2;AGR3	4.294	753170000	43	0	0	0	5272600	862050	0	0	1317500	0	0	0	0	0	0	0	0	0	0	0	0	2284450	0	0	0	0	0	0	0	0	3204350	0	2877550	0	0	3852250	0	0	0	5587900	0	0	0	2349500
O96009	O96009	Napsin-A	NAPSA	72.95	2375100000	54	0	0	0	0	0	4460500	0	0	0	0	0	0	0	0	0	0	0	0	0	18783500	0	0	0	0	0	0	0	0	0	0	0	3780250	0	0	3176550	0	0	0	0	0	0	6360150	0
P00338	P00338	L-lactate dehydrogenase A chain	LDHA	323.31	20970000000	754	0	26556000	14712000	12374000	17441000	27635000	0	9140550	0	35915500	0	28501000	2005850	9187850	20239000	0	0	10693550	24924500	0	4307650	0	48954000	27283500	0	12292500	7356500	13073500	4253750	8460200	13907000	6349000	5227900	0	22769500	101624000	7713350	0	0	0	0	6078900	56194500
P00352;P47895;P30837;O94788	P00352	Retinal dehydrogenase 1	ALDH1A1	36.059	2174100000	103	0	1540550	0	5282650	0	16247000	0	3746350	0	0	0	0	0	3740400	0	0	0	0	8049500	0	2290000	0	5588500	0	0	0	1494050	0	3368350	4634400	0	8359500	0	0	4698250	4480650	4102400	2304100	10900000	0	0	7757800	0
P00390	P00390	Glutathione reductase, mitochondrial	GSR	26.784	5958300000	194	0	4396550	8886800	0	0	3549250	0	0	0	4244250	0	0	0	11236000	0	19889000	0	0	0	0	0	0	7118500	569400	0	8647550	0	0	0	0	0	0	0	5167850	1270850	7294500	689950	0	9847000	0	17500000	0	0
P00403	P00403	Cytochrome c oxidase subunit 2	MT-CO2	9.4626	1641700000	50	0	0	0	3520350	0	0	0	722150	0	2510450	0	4947800	0	2229000	2371750	0	0	0	0	0	0	0	0	0	0	0	1881950	0	0	0	0	2169400	0	0	3300000	0	1056650	0	0	0	0	0	0
P00441	P00441	Superoxide dismutase [Cu-Zn]	SOD1	5.2823	246250000	16	0	0	0	1229350	0	0	0	0	0	0	0	0	0	0	0	0	0	0	0	0	0	0	0	0	0	545850	0	0	0	0	0	0	0	0	0	0	0	0	0	0	2855700	0	0
P00450	P00450	Ceruloplasmin	CP	323.31	62135000000	2821	6208050	29244000	3262450	28716500	22428000	21468000	2472850	5790950	11564000	4520650	9181000	5948050	9702500	92612000	27625000	16742000	0	8222750	18077500	29497500	53087000	0	32140000	4039750	0	26194500	15244000	2866350	27911500	22431000	9948600	35112000	21253000	41916500	31167500	24874500	14582500	42525000	42963500	67410000	10246000	17566050	60700500
P00491	P00491	Purine nucleoside phosphorylase	PNP	309.67	975380000	64	0	0	636750	720000	0	2303600	0	0	0	0	0	0	0	0	512750	0	0	0	0	0	0	0	0	0	0	2197050	0	0	0	0	0	0	0	0	0	0	0	1461250	0	0	3324000	0	0
P00492;Q9NRG1	P00492	Hypoxanthine-guanine phosphoribosyltransferase	HPRT1	3.2475	196680000	22	0	0	0	0	0	0	0	0	0	0	0	0	0	0	0	0	0	0	0	0	0	0	2508500	0	0	0	0	0	0	0	0	0	0	0	0	0	0	0	0	0	0	0	0
P00505	P00505	Aspartate aminotransferase, mitochondrial	GOT2	25.074	877840000	59	0	0	0	1072030	0	2257750	0	1167850	0	0	2699250	0	0	1959000	1014050	0	0	0	0	0	0	0	2185400	2100850	0	3160950	0	0	0	0	751400	484295	0	0	970350	1712100	933850	0	4416000	0	0	0	3501700
P00558	P00558	Phosphoglycerate kinase 1	PGK1	146.96	1785500000	120	3543600	3868100	466545	3736750	0	0	0	2261650	0	1050550	0	0	0	3219300	1863650	0	0	0	0	0	4924650	0	0	3727000	0	0	3373350	0	0	3209450	2411400	1294120	0	0	9235500	0	0	0	1711800	0	0	2231650	0
P00568;Q9Y6K8	P00568;Q9Y6K8	Adenylate kinase isoenzyme 1;Adenylate kinase isoenzyme 5	AK1;AK5	3.993	471500000	3	0	0	0	0	0	0	0	0	0	0	0	0	0	0	0	0	0	0	0	0	0	0	0	0	0	0	0	0	0	0	0	0	0	0	0	0	0	0	0	0	0	0	0
P00734;CON__P00735	P00734	Prothrombin;Activation peptide fragment 1;Activation peptide fragment 2;Thrombin light chain;Thrombin heavy chain	F2	45.286	466680000	23	0	0	0	1447400	0	3039750	0	0	0	0	0	0	0	0	0	0	0	0	0	0	0	0	11050750	0	0	0	0	0	0	0	0	0	0	0	0	0	0	0	5709200	0	0	0	0
P00736	P00736	Complement C1r subcomponent;Complement C1r subcomponent heavy chain;Complement C1r subcomponent light chain	C1R	22.811	763500000	17	0	0	0	0	0	0	0	0	0	0	0	0	0	0	0	0	0	0	0	0	0	0	0	0	0	0	0	0	0	0	0	0	0	0	0	0	0	0	0	0	0	0	0
P00738	P00738	Haptoglobin;Haptoglobin alpha chain;Haptoglobin beta chain	HP	323.31	299570000000	7316	21159000	91479500	57004500	90062500	58358000	25510000	0	74951000	17580500	156745000	3904600	63235000	8906000	70380000	228195000	32338500	0	10844000	9003500	0	1223850	6852500	7880500	25782500	0	143635000	21133500	6436000	12895500	1039910	95991150	20936500	87338500	94832500	182265000	2054350	144640000	17269800	27192000	44634500	14194000	7301300	105538000
P00739	P00739	Haptoglobin-related protein	HPR	19.522	1258800000	19	0	0	0	0	0	0	0	0	0	0	0	5671500	0	0	0	0	0	0	0	0	0	0	0	0	0	0	0	0	0	0	0	0	0	0	0	0	0	0	0	0	0	0	0
P00747;CON__P06868	P00747	Plasminogen;Plasmin heavy chain A;Activation peptide;Angiostatin;Plasmin heavy chain A, short form;Plasmin light chain B	PLG	122.43	8022800000	269	0	9436300	0	5713900	1212850	7561000	0	1602300	0	0	0	21267000	0	3863250	4018450	0	0	0	0	0	0	0	8913500	0	0	3936150	5666150	0	0	1070900	0	859400	6188200	1744300	3234500	4216000	1384450	4961550	8352000	0	0	0	0
P00751	P00751	Complement factor B;Complement factor B Ba fragment;Complement factor B Bb fragment	CFB	304.13	34982000000	1238	0	8407350	0	20621000	33222500	6037000	0	3464150	4993000	9254350	6670500	25261500	0	21944000	27319000	4343800	20366500	14552050	65005500	0	107391000	0	24014850	2848000	0	17765000	4028050	7691750	51491500	1157950	5043050	94050000	43616000	16844500	11385900	29781750	14581350	0	51691000	0	24707000	0	7722500
P00846	P00846	ATP synthase subunit a	MT-ATP6	5.1667	672760000	70	0	3211650	0	2258600	0	0	0	488975	0	601920	0	0	0	3635000	0	0	0	0	0	0	0	0	0	2278700	0	771950	0	0	0	720000	0	0	0	0	526540	0	591600	0	4253300	0	0	0	0
P00915	P00915	Carbonic anhydrase 1	CA1	252.75	5964700000	295	0	0	0	0	0	0	0	0	0	5497700	0	0	0	0	0	0	0	0	0	0	0	0	0	0	0	0	0	0	0	0	0	0	0	0	0	0	0	0	0	0	0	0	0
P00918	P00918	Carbonic anhydrase 2	CA2	9.5296	1149700000	30	0	0	0	0	0	0	0	0	0	808250	0	0	0	3367600	0	0	0	0	0	0	0	0	0	0	0	0	0	0	0	0	0	0	0	0	0	0	0	0	0	0	0	8589750	0
P01008;CON__P41361	P01008	Antithrombin-III	SERPINC1	150.88	8702100000	361	0	3140200	0	3904800	0	0	5859000	1685450	0	0	0	0	0	2735400	3515900	0	0	0	0	0	0	0	11297500	0	0	0	1928700	1558800	1592200	0	1472950	1098750	5745100	7661500	1325200	0	0	6776500	7083700	0	0	0	0
P01009	P01009	Alpha-1-antitrypsin;Short peptide from AAT	SERPINA1	323.31	426370000000	8522	0	123700000	96448000	117795000	53325500	1536650	26719500	38694500	0	188790000	0	12300900	129898000	169245000	160985000	63096000	0	1800300	13278500	0	118090000	0	0	66337500	0	235710000	95358000	0	40678100	63041500	41298000	157245000	133981500	258730000	84226500	4173150	127915000	38379900	220450000	10847000	33957000	65549000	101606000
P01011	P01011	Alpha-1-antichymotrypsin;Alpha-1-antichymotrypsin His-Pro-less	SERPINA3	323.31	91457000000	2857	12206500	8358800	0	10401000	10299500	48999500	8521000	1641700	11992000	6920000	0	18194600	29677500	34979000	33836000	48361000	0	18518500	0	24330500	373540000	11758500	10407500	0	69507500	16246500	10762750	0	29498500	1428250	5713000	116940000	71944000	64601000	26959550	0	4671750	8484000	68040000	20219500	14796000	6058500	10605500
P01019	P01019	Angiotensinogen;Angiotensin-1;Angiotensin-2;Angiotensin-3;Angiotensin-4;Angiotensin 1-9;Angiotensin 1-7	AGT	78.215	746140000	62	0	0	0	0	0	0	0	0	0	0	0	0	0	0	0	0	0	0	1916700	0	0	0	3501200	0	0	0	0	0	0	0	0	0	0	1013800	378860	0	0	0	9521450	0	0	0	0
P01023;CON__ENSEMBL:ENSBTAP00000024146	P01023	Alpha-2-macroglobulin	A2M	323.31	133960000000	3031	1427100	38681500	719200	76055000	39462500	8674500	31349000	12946500	30462400	129881500	0	27671500	25894500	33289000	47620000	4560900	9847000	26643500	21340000	0	12765350	21267500	14514600	8260250	0	82139000	35165000	6891000	24491000	11221500	30727250	1613370	15203150	93424500	15951500	43965000	18683000	86878000	106359500	0	3068650	7078150	75312000
P01024;O95568	P01024	Complement C3;Complement C3 beta chain;C3-beta-c;Complement C3 alpha chain;C3a anaphylatoxin	C3	323.31	268100000000	7367	4260000	151870000	24698500	89746000	172795000	13724000	0	43010500	15778500	69324000	3802400	62925000	10055000	180405000	200420000	67393500	18093000	106569500	75460500	12947000	244840000	5990500	66376500	31336500	4818750	169430000	21881000	5134500	242700000	76198000	45921500	155425000	104246500	223730000	99465500	22830500	117785000	13381500	344255000	0	189460000	104103500	70918500
P01031	P01031	Complement C5;Complement C5 beta chain;Complement C5 alpha chain;C5a anaphylatoxin;Complement C5 alpha chain	C5	28.079	552940000	37	0	0	0	0	0	0	0	0	0	0	0	0	0	0	0	0	0	0	8917950	0	0	0	0	0	0	0	0	0	0	0	0	0	0	0	0	0	0	0	0	0	0	0	0
P01033	P01033	Metalloproteinase inhibitor 1	TIMP1	283	23442000000	908	26841000	13979250	0	45346500	25650000	0	0	27802500	0	21262000	0	0	0	31005500	26330500	43382500	0	18109000	0	0	40606000	4454200	8643100	13784500	0	13298000	26389500	0	20438000	25117000	12682000	71408000	9645400	10384500	44045000	12582850	39398000	0	23063000	15203500	2639600	14823500	13197000
P01034	P01034	Cystatin-C	CST3	157.45	17278000000	545	0	0	0	41321500	42437000	0	0	11639500	0	5664850	0	8778000	0	2567550	0	0	0	0	0	0	66463000	0	0	16410500	0	9199000	41099000	652200	28118500	46493000	15329000	89876500	17265500	0	13415500	12452000	14553000	0	0	11904000	0	88505000	0
P01036	P01036	Cystatin-S	CST4	271.39	142010000000	1181	107760000	0	2024350	632475000	259095000	0	0	93498500	0	40635000	0	2565250	90480000	21000000	10704150	0	0	0	0	0	301045000	0	22394500	345390000	0	8952000	155960000	0	97389300	952950000	10762000	301265000	35520000	0	154292000	82037000	205180000	0	339230000	0	0	8879500	0
P01037	P01037	Cystatin-SN	CST1	323.31	5025200000	44	0	0	0	1130850	15418500	0	0	33023500	0	12081000	0	0	0	22184000	0	0	0	0	0	0	0	0	8199000	7531000	0	0	0	0	8337500	15474500	2346150	1346550	0	0	0	0	2006650	0	0	0	0	0	0
P01040	P01040	Cystatin-A;Cystatin-A, N-terminally processed	CSTA	76.89	2803400000	150	0	0	0	0	3516600	0	0	0	7879000	3479650	0	0	9666000	0	16758100	0	0	0	0	10676000	0	0	4463250	1472950	0	0	0	2691900	0	5547900	7127300	0	4440850	0	4086500	13249500	9932100	0	2651200	0	0	0	0
P01042	P01042	Kininogen-1;Kininogen-1 heavy chain;T-kinin;Bradykinin;Lysyl-bradykinin;Kininogen-1 light chain	KNG1	56.594	1598300000	70	0	0	0	1715600	0	0	0	0	0	0	0	2220900	0	0	4627650	0	0	0	0	0	0	0	0	0	0	0	0	0	2552100	1641050	2616500	0	476945	0	0	0	2260250	0	8896150	0	0	0	0
P01591	P01591	Immunoglobulin J chain	IGJ	185.94	89967000000	3490	21950000	100843300	82117000	78445500	71286000	4263150	6376000	49813000	11252500	75124000	0	6988000	0	131445000	37688850	192302500	0	110975000	13773000	0	86265000	13317000	9947450	80559000	0	81721500	56412500	318550000	53750500	45946000	74609500	157380000	62376500	132905000	198140000	8095550	109890000	0	12544000	69935500	9589050	16333500	91799500
P01594	P01594	Ig kappa chain V-I region AU		23.851	0	0	0	0	0	0	0	0	0	0	0	0	0	0	0	0	0	0	0	0	0	0	0	0	0	0	0	0	0	0	0	0	0	0	0	0	0	0	0	0	0	0	0	0	0
P01597	P01597	Ig kappa chain V-I region DEE		8.9271	4572900000	67	0	8438050	0	0	0	0	0	0	0	0	0	0	0	11436000	0	0	0	0	6805000	0	0	0	0	0	0	0	0	0	0	0	0	0	0	5461150	7302000	0	4719400	0	31690500	0	0	0	0
P01598	P01598	Ig kappa chain V-I region EU		99.063	5387100000	155	0	0	952190	0	0	0	0	4763150	0	8617350	0	0	0	4927250	0	0	0	3816700	0	0	0	13517500	0	0	0	2284600	0	0	1961700	0	0	2500800	1773600	2452650	4466150	0	0	9091500	18916000	0	15794500	0	0
P01601	P01601	Ig kappa chain V-I region HK101		102.3	0	0	0	0	0	0	0	0	0	0	0	0	0	0	0	0	0	0	0	0	0	0	0	0	0	0	0	0	0	0	0	0	0	0	0	0	0	0	0	0	0	0	0	0	0
P01602	P01602	Ig kappa chain V-I region HK102	IGKV1-5	2.9356	2270100	1	0	0	0	0	0	0	0	0	0	0	0	0	0	0	0	0	0	0	0	0	0	0	0	0	0	0	0	0	0	0	0	0	0	0	0	0	0	0	0	0	0	0	0
P01605	P01605	Ig kappa chain V-I region Lay		34.977	18438000000	159	0	15667000	21647500	0	0	0	0	0	0	239420	0	0	5989000	62756500	0	6343000	0	8952000	0	0	9118000	0	0	8391500	0	0	0	0	8112000	3274950	6465000	41066500	0	22721500	35492000	0	30193000	0	0	0	0	18120000	0
P01607	P01607	Ig kappa chain V-I region Rei		7.0431	385620000	5	0	0	0	0	0	0	0	0	0	0	0	0	0	0	0	0	0	0	0	0	0	0	0	0	0	0	0	0	0	0	0	0	0	0	0	0	0	0	0	0	0	0	0
P01609	P01609	Ig kappa chain V-I region Scw		55.053	1972400000	122	0	1532500	0	2690600	0	0	0	0	0	1200000	0	0	0	2553700	1942650	0	0	1938450	0	0	1892000	0	0	0	0	5811500	9303000	0	1917900	0	3464950	0	0	5149350	0	0	6167000	0	14000000	2833400	0	0	0
P01610;P80362;P01600	P01610;P80362;P01600	Ig kappa chain V-I region WEA;Ig kappa chain V-I region WAT;Ig kappa chain V-I region Hau		152.73	1175700000	47	0	4638400	1694700	0	0	2051450	0	0	0	0	0	3522700	0	2722300	0	0	0	0	0	0	1196800	0	8949200	0	0	0	0	0	0	712600	0	0	0	1335600	650750	0	2536350	0	0	0	0	0	0
P01611	P01611	Ig kappa chain V-I region Wes		68.268	0	1	0	0	0	0	0	0	0	0	0	0	0	0	0	0	0	0	0	0	0	0	0	0	0	0	0	0	0	0	0	0	0	0	0	0	0	0	0	0	0	0	0	0	0
P01612	P01612	Ig kappa chain V-I region Mev		51.869	26383000	2	0	0	0	0	0	0	0	0	0	0	0	1882050	0	0	0	0	0	0	0	0	0	0	0	0	0	0	0	0	0	0	0	0	0	0	0	0	0	0	0	0	0	0	0
P01613	P01613	Ig kappa chain V-I region Ni		101.35	3467400000	212	7539500	0	0	1039400	0	0	9851350	2205000	0	0	6917850	0	0	957300	0	0	16752000	5689000	0	0	0	0	0	586800	0	0	3171750	0	2916300	2387400	0	1211750	1655400	6815350	1780500	0	0	0	15497000	0	0	3016400	0
P01616	P01616	Ig kappa chain V-II region MIL		3.8555	0	0	0	0	0	0	0	0	0	0	0	0	0	0	0	0	0	0	0	0	0	0	0	0	0	0	0	0	0	0	0	0	0	0	0	0	0	0	0	0	0	0	0	0	0
P01617;P06309	P01617;P06309	Ig kappa chain V-II region TEW;Ig kappa chain V-II region GM607		175.21	36422000000	1088	0	0	3738350	21590500	38875000	0	0	21188000	0	46034500	0	0	7526500	2324650	22514500	28593000	0	44830500	0	0	0	0	0	30950500	0	98935500	0	0	29223500	17472000	44400500	49581500	28145500	48501000	56829500	5596500	0	0	0	45365500	5211250	44293000	16328500
P01619	P01619	Ig kappa chain V-III region B6		8.9389	612730000	81	0	0	0	0	446660	0	0	0	0	0	0	3074500	0	1897200	0	0	0	0	0	0	0	0	0	0	0	0	0	0	0	0	0	0	0	997250	0	3142950	0	0	0	0	0	0	0
P01620	P01620	Ig kappa chain V-III region SIE		50.098	32836000	3	0	0	0	0	0	0	0	0	0	0	0	0	0	0	0	0	0	0	0	0	0	0	0	0	0	0	0	0	0	0	0	0	0	0	0	0	0	0	1880700	0	0	0	0
P01621	P01621	Ig kappa chain V-III region NG9		33.288	25022000000	520	0	14888500	10363050	10462350	4974150	0	0	3739400	5491000	13328750	0	0	5691500	59637500	32198750	0	0	0	8649000	0	4845650	0	0	16776000	0	4521950	10049000	0	0	4076750	0	19213000	2443450	21592000	18365750	0	18025500	0	8599700	5651500	29108500	38583000	17059000
P01622	P01622	Ig kappa chain V-III region Ti		20.107	81728000	13	0	0	922630	0	0	0	0	0	0	0	0	0	0	0	0	0	0	0	0	0	0	0	0	0	0	0	0	0	0	0	0	0	0	0	932040	0	0	0	0	0	0	0	0
P01624	P01624	Ig kappa chain V-III region POM		25.317	57103000	16	0	0	0	0	0	0	0	0	0	0	0	0	0	0	0	0	0	0	0	0	0	0	0	0	0	0	0	0	0	0	0	0	0	0	0	0	0	0	0	0	0	0	0
P01625;P06314	P01625;P06314	Ig kappa chain V-IV region Len;Ig kappa chain V-IV region B17		157.46	1860200000	61	0	0	9940050	2467000	0	0	0	0	0	0	0	0	0	14524000	572000	0	0	0	0	0	0	0	0	0	0	0	1895900	0	0	0	0	2397350	0	1829900	2031350	0	1564600	0	0	0	0	13686550	0
P01700;P01712;P01709	P01700;P01712;P01709	Ig lambda chain V-I region HA;Ig lambda chain V-II region WIN;Ig lambda chain V-II region MGC		6.3193	11244000000	106	0	0	0	1413600	17103000	0	0	10826000	0	48127000	0	0	0	2281850	0	0	0	0	0	0	0	0	48422500	6414000	0	6467750	0	0	2687350	1817550	6269000	13300000	0	647600	57705000	0	9440400	0	0	0	0	0	0
P01701	P01701	Ig lambda chain V-I region NEW		14.752	18327000000	297	0	10106000	7381000	3715550	12785000	0	0	0	0	4705150	107397500	0	0	10472050	47891500	0	0	0	0	0	5680000	0	0	18518500	0	2877550	2702450	0	4242050	0	4345100	7544350	0	5276350	10955000	0	20064000	0	51313000	0	0	0	34879500
P01702;P06316	P01702;P06316	Ig lambda chain V-I region NIG-64;Ig lambda chain V-I region BL2		13.116	0	0	0	0	0	0	0	0	0	0	0	0	0	0	0	0	0	0	0	0	0	0	0	0	0	0	0	0	0	0	0	0	0	0	0	0	0	0	0	0	0	0	0	0	0
P01703	P01703	Ig lambda chain V-I region NEWM		5.5902	3627300000	48	0	2625700	0	0	0	0	0	1711750	0	3199950	0	0	0	4308100	3543100	0	0	0	0	0	0	0	0	0	0	0	0	0	0	0	0	1735600	3477700	3324700	7827050	0	589650	0	14456500	0	0	10868050	148565000
P01705	P01705	Ig lambda chain V-II region NEI		3.0443	283160000	14	0	0	0	0	0	0	0	0	0	0	0	0	0	0	0	0	0	0	0	0	0	0	0	0	0	0	0	0	0	0	0	1412000	0	0	0	0	206725	0	3087300	0	0	0	0
P01708	P01708	Ig lambda chain V-II region BUR		3.3552	694790000	16	0	0	0	0	0	0	0	0	0	0	0	0	0	0	5780800	0	0	0	3646200	0	0	0	0	0	0	0	0	0	0	0	0	0	0	0	0	0	0	0	0	0	0	0	0
P01710	P01710	Ig lambda chain V-II region BO		2.3071	0	2	0	0	0	0	0	0	0	0	0	0	0	0	0	0	0	0	0	0	0	0	0	0	0	0	0	0	0	0	0	0	0	0	0	0	0	0	0	0	0	0	0	0	0
P01714	P01714	Ig lambda chain V-III region SH		86.717	5571000000	100	3100400	809800	1267750	0	5020500	0	0	8908050	0	11995500	0	0	0	6409000	9306000	0	3717050	3468200	5430500	0	0	0	0	6491850	0	946150	0	8878500	1405800	0	2948050	6768650	0	2047850	15460300	0	3641400	0	33551500	0	0	0	0
P01715	P01715	Ig lambda chain V-IV region Bau		2.3482	16718000000	129	0	19194000	0	7667200	25551500	0	0	9785000	0	0	0	7986000	0	3961050	7594500	0	0	0	0	0	0	0	0	36218500	0	15035000	0	0	5368000	3335250	5714500	33404500	0	0	26733000	0	33746500	0	0	0	12796000	1521700	0
P01717	P01717	Ig lambda chain V-IV region Hil		90.018	0	0	0	0	0	0	0	0	0	0	0	0	0	0	0	0	0	0	0	0	0	0	0	0	0	0	0	0	0	0	0	0	0	0	0	0	0	0	0	0	0	0	0	0	0
P01719;P01720	P01719	Ig lambda chain V-V region DEL		93.034	94876000	4	0	0	0	0	0	0	0	0	0	0	0	0	0	0	0	0	0	0	0	0	0	0	0	0	0	0	0	0	0	0	0	0	0	565750	0	0	0	0	0	0	0	0	0
P01742;P01761;P06326	P01742;P01761;P06326	Ig heavy chain V-I region EU;Ig heavy chain V-I region SIE;Ig heavy chain V-I region Mot		12.458	31008000	2	0	0	0	0	0	0	0	0	0	0	0	0	0	0	0	0	0	0	0	0	0	0	0	0	0	0	0	0	0	0	0	0	0	0	262375	0	0	0	0	0	0	0	0
P01743;A6NJS3	P01743;A6NJS3	Ig heavy chain V-I region HG3;Putative V-set and immunoglobulin domain-containing-like protein IGHV1OR21-1	IGHV1OR21-1	74.91	4316200000	190	0	0	1098100	5589250	1772600	0	0	0	0	3862900	0	5989500	0	4649050	6222300	0	0	21118500	0	0	4388450	0	0	0	0	5551600	2940750	14280350	0	0	4443400	5219100	8633950	4479750	0	0	6527600	0	4932700	0	11954500	0	0
P01762	P01762	Ig heavy chain V-III region TRO		90.786	634380000	33	0	0	0	0	0	0	0	0	0	0	0	0	0	1745100	1160000	0	0	0	0	0	0	0	7470500	0	0	0	1456900	0	0	0	0	0	0	1792700	0	0	703450	0	3360950	0	0	0	0
P01763	P01763	Ig heavy chain V-III region WEA		17.759	0	0	0	0	0	0	0	0	0	0	0	0	0	0	0	0	0	0	0	0	0	0	0	0	0	0	0	0	0	0	0	0	0	0	0	0	0	0	0	0	0	0	0	0	0
P01764	P01764	Ig heavy chain V-III region 23	IGHV3-23	102.79	4499300000	148	10762000	5199300	1474900	5612800	13639500	0	0	7466200	0	3708650	0	0	0	4705850	3048150	0	0	9198050	0	0	5401500	0	0	0	0	0	0	0	13194500	11962000	9053850	7987650	0	6711500	708300	0	2495200	4082750	0	10357000	14224000	0	0
P01765	P01765	Ig heavy chain V-III region TIL		202.19	172160000	10	0	0	0	0	0	0	0	0	0	0	0	0	0	0	0	0	0	0	0	0	0	0	0	0	0	0	0	0	0	0	0	0	0	0	0	0	0	0	0	0	0	0	0
P01766;P01777	P01766	Ig heavy chain V-III region BRO		273.88	9008800000	392	0	0	0	14615500	24134000	0	0	0	11992500	8772350	0	0	13295500	8822000	15137500	0	0	32173500	0	0	0	0	0	11627250	0	13152450	0	17929500	23699500	24440500	25071000	17117150	8037500	10080500	7956550	0	5779500	0	0	7539250	2088550	0	0
P01767	P01767	Ig heavy chain V-III region BUT		60.271	0	0	0	0	0	0	0	0	0	0	0	0	0	0	0	0	0	0	0	0	0	0	0	0	0	0	0	0	0	0	0	0	0	0	0	0	0	0	0	0	0	0	0	0	0
P01768	P01768	Ig heavy chain V-III region CAM		7.149	0	0	0	0	0	0	0	0	0	0	0	0	0	0	0	0	0	0	0	0	0	0	0	0	0	0	0	0	0	0	0	0	0	0	0	0	0	0	0	0	0	0	0	0	0
P01770	P01770	Ig heavy chain V-III region NIE		46.547	8217500000	758	0	6943250	15574000	6087650	2445050	0	0	1826700	9255000	4641850	0	0	34003500	0	3578050	10064500	0	2112500	0	0	0	5572950	0	6363100	0	7993100	4802000	0	5118750	0	0	9238450	980800	4388950	7891900	0	5669000	0	4746200	9408950	3648200	8594300	0
P01771	P01771	Ig heavy chain V-III region HIL		29.526	1808300000	56	0	0	0	0	8206500	0	0	2240750	0	0	0	0	0	2995950	5112700	0	0	3765250	0	0	4675550	0	0	0	0	3035550	0	8941000	1092650	0	2504250	4885650	1002850	0	0	0	0	0	0	0	3966800	0	0
P01772	P01772	Ig heavy chain V-III region KOL		2.7875	126550000	6	0	0	0	0	0	0	0	0	0	0	0	0	0	0	0	0	0	0	0	0	0	0	0	0	0	0	0	0	0	0	0	0	0	0	0	0	0	0	0	0	0	0	0
P01775	P01775	Ig heavy chain V-III region LAY		3.0292	0	0	0	0	0	0	0	0	0	0	0	0	0	0	0	0	0	0	0	0	0	0	0	0	0	0	0	0	0	0	0	0	0	0	0	0	0	0	0	0	0	0	0	0	0
P01780	P01780	Ig heavy chain V-III region JON		18.788	537820000	22	0	0	0	0	0	0	0	0	0	0	0	11875150	0	0	0	0	8490500	0	0	0	1406100	0	0	0	0	0	0	0	0	0	0	1328300	0	0	682400	0	0	0	0	0	0	3160200	0
P01781;P01782	P01781	Ig heavy chain V-III region GAL		133	2720900000	97	0	1311150	0	3701400	0	0	0	0	0	0	0	0	0	7284450	5585350	0	0	0	0	0	2395350	0	0	6520300	0	3622250	5275650	0	0	1226850	1154900	4596400	0	2961200	2324250	5570500	0	0	2452000	0	4846900	0	0
P01824	P01824	Ig heavy chain V-II region WAH		9.9799	413290000	35	0	0	0	0	0	0	0	0	0	0	0	0	0	5793650	0	0	0	0	0	0	0	0	0	0	0	0	0	0	0	0	0	904250	0	0	0	0	0	0	0	1883700	0	0	0
P01833	P01833	Polymeric immunoglobulin receptor;Secretory component	PIGR	323.31	637120000000	9947	51459500	215935000	69355000	596530000	701320000	8464150	36122000	717090000	15091500	856885000	144132500	152228000	60065000	571550000	526090000	259585000	0	539560000	143432000	3986000	1635950000	10435000	439485000	753615000	0	488675000	457175000	368965000	1196700000	895570000	461835000	1650250000	412870000	517210000	1930500000	34758000	1570750000	7168700	73478500	30524500	49489500	342030000	95981000
P01834	P01834	Ig kappa chain C region	IGKC	323.31	83478000000	11953	0	89640000	111527200	80456000	54028000	3130050	6318000	18452450	0	29674500	11504000	0	12725500	10776200	10681750	42473500	1461050	48812500	5678500	1745700	95868500	2380400	8667050	39397000	6801000	65315500	19613000	11487950	6357350	51400000	29680000	25847250	8491500	95781500	17158000	0	81689500	5737800	16939000	3383050	29457600	10403050	8508000
P01857	P01857	Ig gamma-1 chain C region	IGHG1	323.31	949430000000	21078	120683300	217115000	513065000	1393750000	813875000	14148300	8170500	371845000	0	476720000	0	52735500	17440500	207585000	399945000	393945000	2129450	1433465000	58219500	33940000	635545000	40291000	69138000	586760000	0	953460000	389230000	219300000	530780000	727910000	391470000	719485000	1831150000	1926100000	289465000	45992500	842470000	15861500	148410000	15266000	28104500	277870000	132965000
P01859	P01859	Ig gamma-2 chain C region	IGHG2	323.31	76871000000	3542	8142000	41361500	13275000	78916500	24532000	0	23681500	38016500	33361500	49096500	0	7439000	54255000	22798000	57639000	18278500	0	80600000	11317950	55965000	35740500	3886150	0	30801000	0	22389000	48223500	20995500	51133000	34847000	44382500	18560000	31657000	118036500	18562000	14064500	42836500	5527000	29552000	0	43681000	5064000	14980000
P01860	P01860	Ig gamma-3 chain C region	IGHG3	323.31	305920000000	4885	5498500	50552000	391960000	305480000	132916850	0	0	202310000	9450000	236125000	5036450	18625000	4477450	48045000	40511500	279245000	0	575380000	10699500	0	82337000	13844000	8193000	269860000	4434150	340645000	181350000	4125250	379900000	108170000	201810000	347970000	207235000	170665000	119840000	0	235550000	17050500	29517000	15334500	0	68460500	8975500
P01861	P01861	Ig gamma-4 chain C region	IGHG4	160.76	8814200000	664	0	6224850	0	11861000	5573750	0	5389000	0	0	0	0	11851500	6116500	4098200	3957150	0	0	10770900	0	0	0	5214000	3822150	3841250	0	0	10522200	0	0	2590450	3345800	0	948500	14090500	1276300	0	4123500	0	8600550	0	0	6069000	0
P01871	P01871	Ig mu chain C region	IGHM	323.31	342290000000	7385	80254500	178135000	64346000	140215000	107400000	61535000	42753100	145890000	15156500	116090000	84560350	1834230	58023000	263595000	109589000	73905500	3516600	143710000	214945000	96832500	135890000	31921000	17939000	176235000	0	161455000	304320000	74526000	193105000	121225000	71464500	214555000	54729500	563060000	114600000	48929000	133295000	0	385330000	168530000	16942500	248455000	87743500
P01876	P01876	Ig alpha-1 chain C region	IGHA1	323.31	1322500000000	19875	97925500	200885000	841320000	839830000	1550160500	188335000	38384000	384025000	11631000	2291950000	13966500	60036500	18820150	440215000	977271500	278155000	32330000	1927100000	232275000	4992300	440440000	13516200	103974000	1669410000	0	1709450000	331665000	2536055000	469266000	1186850000	1531150000	1796440000	1278150000	1478565000	4435650000	229075000	2580000000	36518910	38927000	6117000	47157500	270665000	9697000
P01877	P01877	Ig alpha-2 chain C region	IGHA2	323.31	65776000000	2654	0	1176900	1312000	25371500	91467000	0	0	26447000	0	117475000	2824400	3717700	9761500	3898100	50481250	53842500	0	136195000	3782100	0	90188800	177645	0	86407500	0	52942500	86990000	100792000	46939500	35376000	118650000	79623000	13351500	57025000	163800000	9995400	123765000	2200800	3967000	3876750	22948500	100469000	32251500
P01880	P01880	Ig delta chain C region	IGHD	323.31	5543400000	349	4453600	3630600	0	11307500	1944150	20960200	0	0	0	0	0	2597250	0	14578650	4854000	0	0	13826500	10358700	0	6300950	0	8636500	5193000	0	2228100	849200	0	4691450	2843400	893000	1877850	16672500	3875450	0	0	3471950	0	10045000	0	0	0	0
P01903;P01906	P01903	HLA class II histocompatibility antigen, DR alpha chain	HLA-DRA	45.738	798830000	40	0	0	0	0	0	2216350	0	0	0	0	0	0	0	0	0	0	0	0	0	0	0	0	0	0	0	0	0	0	688750	0	0	2730550	0	0	4248650	0	0	0	0	0	0	0	0
P01920	P01920	HLA class II histocompatibility antigen, DQ beta 1 chain	HLA-DQB1	2.4743	26129000	2	0	0	0	0	0	0	0	0	0	0	0	0	0	0	0	0	0	0	0	0	0	0	0	0	0	0	0	0	0	0	0	0	0	0	0	0	0	4743550	0	0	0	0	0
P02042	P02042	Hemoglobin subunit delta	HBD	298.27	18227000000	333	0	0	0	0	0	0	0	6166450	0	0	0	0	2650100	17861000	0	0	0	0	0	0	0	0	0	0	0	4787300	0	0	14464000	7254750	0	0	0	0	0	0	0	0	0	0	0	0	0
P02511	P02511	Alpha-crystallin B chain	CRYAB	13.36	305230000	20	0	1582050	0	0	0	0	0	3771550	0	0	0	0	0	0	0	0	0	0	0	0	0	0	0	1339305	0	0	0	0	0	0	0	0	0	0	1653150	0	0	0	0	0	0	3274500	0
P02545	P02545	Prelamin-A/C;Lamin-A/C	LMNA	125.35	2550800000	181	8000000	1751350	0	2526500	0	14868000	5301500	502800	0	6377800	0	0	0	739600	3379150	0	0	0	3575250	0	0	0	9829500	20887500	0	0	3827900	0	0	14782500	11035150	6354750	0	0	10386500	0	1914550	0	0	0	0	0	0
P02549	P02549	Spectrin alpha chain, erythrocytic 1	SPTA1	7.9655	3586500000	19	0	0	0	0	0	0	0	0	0	0	0	0	0	0	15348000	0	0	0	0	0	0	0	0	0	0	2847050	0	0	0	0	0	0	0	0	0	0	0	0	0	0	0	0	0
P02647;CON__P15497	P02647	Apolipoprotein A-I;Proapolipoprotein A-I;Truncated apolipoprotein A-I	APOA1	323.31	11808000000	398	0	0	0	45022000	44272500	6285500	0	10771100	0	0	0	11366050	4772100	2845500	0	0	0	0	24122000	0	12904000	8351000	0	691600	0	0	0	0	14761000	7566050	0	1507250	0	0	6806000	0	10546350	2554000	6077250	0	0	9396200	0
P02649;CON__Q03247	P02649	Apolipoprotein E	APOE	5.3286	0	4	0	0	0	0	0	0	0	0	0	0	0	0	0	0	0	0	0	0	0	0	0	0	0	0	0	0	0	0	0	0	0	0	0	0	0	0	0	0	0	0	0	0	0
P02652	P02652	Apolipoprotein A-II;Proapolipoprotein A-II;Truncated apolipoprotein A-II	APOA2	30.353	1008900000	25	0	0	0	1372450	2895400	4868750	0	0	0	0	0	0	0	0	0	0	0	0	8199200	0	4315300	0	0	0	0	0	0	0	0	0	0	0	0	0	0	0	0	0	0	0	0	0	0
P02671	P02671	Fibrinogen alpha chain;Fibrinopeptide A;Fibrinogen alpha chain	FGA	323.31	37100000000	631	0	22154500	0	17646750	6673000	0	0	11176600	0	11512500	0	0	0	7204500	19199000	0	0	14623700	0	0	0	0	0	10253800	0	0	12384500	0	11033450	7477850	19718500	3187850	18380000	3030150	7799400	24242000	1073150	0	35720000	0	0	0	0
P02675	P02675	Fibrinogen beta chain;Fibrinopeptide B;Fibrinogen beta chain	FGB	323.31	44945000000	1507	0	16376000	0	12365250	20412500	0	0	9711800	0	0	0	0	0	8383950	49223000	9286000	2749550	2818750	0	0	0	0	0	5769800	0	3619950	9064300	0	6927300	5595300	26418000	0	20213000	2452400	3248050	0	6628350	0	19736000	0	0	0	8618400
P02679	P02679	Fibrinogen gamma chain	FGG	323.31	60004000000	706	0	14469500	0	27536000	16990500	7537500	64172000	3576600	0	4733300	0	19976500	0	4231950	17557000	0	3366050	0	15543000	0	0	0	4578700	0	0	1218100	2500500	0	1546950	0	4747650	501450	7542000	6339300	0	0	1320700	22340000	43440000	0	0	0	0
P02730	P02730	Band 3 anion transport protein	SLC4A1	127.31	1017200000	53	0	0	0	0	0	0	0	0	0	0	0	0	0	0	0	0	0	0	0	0	0	0	0	0	0	0	0	0	0	0	0	0	0	0	0	0	0	0	0	0	0	0	0
P02741	P02741	C-reactive protein;C-reactive protein(1-205)	CRP	19.521	4612100000	101	0	0	0	0	0	0	0	0	0	0	0	0	26543500	0	0	0	0	0	0	0	0	0	0	0	0	0	0	0	0	0	0	0	0	0	0	12683000	0	0	0	0	0	0	0
P02743	P02743	Serum amyloid P-component;Serum amyloid P-component(1-203)	APCS	83.676	1735700000	97	0	0	0	0	0	0	0	0	0	0	0	0	0	0	0	0	0	0	0	0	0	0	0	0	0	0	0	0	0	0	0	0	0	0	0	0	0	0	0	0	0	0	0
P02745	P02745	Complement C1q subcomponent subunit A	C1QA	2.5272	450630000	13	0	0	0	0	0	0	0	0	0	0	0	0	0	0	0	0	0	0	0	0	0	0	0	0	0	0	0	0	0	0	0	0	0	0	0	0	0	0	0	0	0	0	0
P02746	P02746	Complement C1q subcomponent subunit B	C1QB	12.613	4234500000	145	0	0	0	0	0	0	0	0	0	0	0	0	0	0	0	0	0	0	16894000	0	0	0	5997000	0	0	3580200	0	0	3844900	0	5698150	6327750	0	0	0	0	0	7686500	10733000	0	0	0	0
P02747	P02747	Complement C1q subcomponent subunit C	C1QC	27.59	2772900000	116	0	0	0	1029750	0	2610900	0	0	0	235145	0	0	0	0	0	0	0	0	0	0	0	0	0	0	0	0	0	0	0	0	0	0	0	0	0	0	0	20363500	9062950	0	0	0	0
P02748;CON__Q3MHN2	P02748	Complement component C9;Complement component C9a;Complement component C9b	C9	37.873	7405300000	312	0	0	0	3361500	0	0	0	0	0	1438650	0	0	0	0	1884550	0	0	0	0	0	1116000	0	3875350	0	0	0	0	0	1473150	0	1499350	487155	0	0	0	0	2326300	18591500	10150150	0	0	0	0
P02749;CON__P17690	P02749	Beta-2-glycoprotein 1	APOH	139.98	9451400000	360	0	9593150	0	11654000	1664600	12107000	6683700	5057850	0	932900	0	9177450	0	12556500	4482800	0	6794500	0	6317950	0	5408000	9315000	14831100	3219700	0	9391600	9274750	0	7091800	4189150	2633900	3172700	15412250	9966200	4739600	0	6508750	1968350	25401500	0	0	5174550	0
P02750	P02750	Leucine-rich alpha-2-glycoprotein	LRG1	192.55	7357500000	265	0	0	978900	0	0	14380000	0	0	0	0	0	0	5415000	3196550	5346550	0	21002000	0	0	0	9656350	8471000	8481000	0	0	0	0	0	0	0	0	1462400	0	0	0	0	0	7616000	4138750	5386500	0	0	0
P02751	P02751	Fibronectin;Anastellin;Ugl-Y1;Ugl-Y2;Ugl-Y3	FN1	323.31	13299000000	677	0	8473100	1692100	8922100	3744350	0	0	1814700	0	7657600	0	23031500	0	28377500	0	0	0	0	15187500	0	0	21589000	0	0	0	0	0	0	0	0	0	1496000	0	7492850	0	0	7023500	9488500	27876500	0	0	0	2157050
P02753	P02753	Retinol-binding protein 4;Plasma retinol-binding protein(1-182);Plasma retinol-binding protein(1-181)	RBP4	6.2102	382610000	37	0	1070500	0	1093700	0	0	0	0	0	0	0	0	0	2410750	0	0	0	0	0	0	0	0	2795750	0	0	0	0	0	0	0	0	0	0	0	220530	0	0	0	2485750	0	0	0	0
P02760	P02760	Protein AMBP;Alpha-1-microglobulin;Inter-alpha-trypsin inhibitor light chain;Trypstatin	AMBP	12.251	687580000	55	0	0	0	0	0	0	0	0	18357500	0	0	0	7885500	0	0	0	0	0	0	0	0	0	0	0	0	0	0	0	0	0	0	0	0	0	0	0	0	0	0	0	0	0	4177600
P02763	P02763	Alpha-1-acid glycoprotein 1	ORM1	310.89	33845000000	565	0	2319700	0	11050500	21644500	0	0	2162100	0	2564450	0	39482500	0	3752700	21587000	0	0	8426000	24601000	0	10861500	0	0	0	0	14969500	0	0	3738750	3282750	13182500	12320500	17425500	2817650	6510550	0	6422150	0	16867000	0	5771500	0	0
P02765	P02765	Alpha-2-HS-glycoprotein;Alpha-2-HS-glycoprotein chain A;Alpha-2-HS-glycoprotein chain B	AHSG	111.35	8060900000	162	0	7997600	0	7447800	16584500	20587000	0	4765200	0	3492300	0	0	26677000	4090900	6125250	0	0	0	6943000	0	10629300	0	0	0	0	4889150	0	0	14361050	0	11304000	6713150	9573800	1203500	0	0	5021500	0	33125000	0	0	3389650	0
P02766	P02766	Transthyretin	TTR	64.452	2996800000	223	0	3078150	0	3853350	2951700	6254250	10215150	2157000	0	0	0	1255150	0	2799450	2969650	0	0	0	0	0	7770650	0	0	0	0	2636750	5857500	4169150	6804400	2533250	3552250	1052250	1726600	3076650	1906000	0	3517600	0	11861650	0	7079500	0	0
P02774;CON__Q3MHN5;CON__ENSEMBL:ENSBTAP00000018229	P02774	Vitamin D-binding protein	GC	323.31	25772000000	623	2913100	8541050	1509950	6767050	14438000	0	5076000	2184400	0	7640050	26191000	41781500	1693950	25690000	3442350	0	0	0	18421500	0	0	0	63626000	0	0	753950	0	0	2076550	2075650	2054650	7239400	2904850	540700	7761100	0	5124450	33889500	80371000	0	0	2211200	0
P02786	P02786	Transferrin receptor protein 1;Transferrin receptor protein 1, serum form	TFRC	15.113	74816000	3	0	0	0	0	0	0	0	0	0	0	0	0	0	0	0	0	0	0	0	0	0	0	0	0	0	0	0	0	0	0	0	0	0	0	0	0	0	0	0	0	0	0	0
P02787	P02787	Serotransferrin	TF	323.31	247510000000	6657	7705950	174750000	5495400	250255000	288390000	42784500	26809700	142725000	54655500	120095000	0	27833000	12818500	146170000	235875000	79188000	2099050	235240000	91223500	0	227535000	18960500	42340500	63415500	3381500	285390000	173755000	89683500	294780000	102809000	138930000	262420000	275495000	273415000	239750000	24019000	194225000	14010650	141498500	5244000	219915000	101411000	20662500
P02788	P02788	Lactotransferrin;Lactoferricin-H;Kaliocin-1;Lactoferroxin-A;Lactoferroxin-B;Lactoferroxin-C	LTF	323.31	1587900000000	40847	74288500	826410000	481395000	1330350000	1765205000	67170000	21696000	1020955000	32452500	1486200000	52656400	72536500	201665000	1186060000	1761240000	927045000	7355500	1560650000	81336500	1850965	4051150000	25463500	106084000	1073350000	3411750	1287850000	735075000	610385000	1880800000	1075400000	848510000	3322600000	1527000000	1910150000	4991400000	62167000	2382400000	13390000	488805000	108568500	208610000	332085000	670890000
P02790	P02790	Hemopexin	HPX	323.31	17151000000	749	0	9667350	2321550	7155750	4549850	0	0	3008850	0	5755900	0	5086500	0	2581700	4293550	21223500	0	0	0	0	5345950	8708500	0	2381800	0	15691000	2449550	0	5482800	1201750	0	5812100	9475800	14363000	6030700	0	11426000	10668500	3606300	0	9265500	6041750	36653500
P02792	P02792	Ferritin light chain	FTL	105.81	2545100000	199	0	0	0	553450	0	2675350	0	0	0	0	0	4067350	0	3402700	2706450	0	0	0	1262600	0	0	0	0	0	0	2172750	0	0	3721150	3592700	0	1022050	4111550	3973850	0	4027650	0	0	0	0	0	0	0
P02794	P02794	Ferritin heavy chain;Ferritin heavy chain, N-terminally processed	FTH1	57.968	4007900000	185	0	0	0	0	0	0	0	0	0	0	0	0	0	0	0	0	0	0	0	0	0	0	7999000	0	0	2771450	0	0	0	0	0	3995500	0	0	0	0	0	0	0	0	0	0	0
P02808	P02808	Statherin	STATH	4.2029	808070000	105	0	0	0	2183700	0	0	0	0	0	0	0	0	0	0	0	0	0	0	0	0	28679100	0	0	0	0	0	0	0	1014680	13585500	0	3361950	0	0	0	0	0	0	0	0	0	2639200	0
P02810	P02810	Salivary acidic proline-rich phosphoprotein 1/2;Salivary acidic proline-rich phosphoprotein 1/2	PRH1	323.31	1090800000	19	0	0	0	0	0	0	0	0	0	0	0	0	0	0	0	0	0	0	0	0	6536000	0	0	0	0	0	0	0	0	35645500	0	0	0	0	0	0	0	0	0	0	0	0	0
P02812	P02812	Basic salivary proline-rich protein 2;Basic proline-rich peptide IB-1;Basic proline-rich peptide P-E;Basic proline-rich peptide IB-7	PRB2	124.33	381800000	18	0	0	0	0	0	0	0	0	0	0	0	0	0	0	0	0	0	0	0	0	13947000	0	0	0	0	0	0	0	0	0	0	0	0	0	0	0	0	0	0	0	0	0	0
P02814	P02814	Submaxillary gland androgen-regulated protein 3B;Peptide P-A;Peptide D1A	SMR3B	33.312	11550000000	632	0	0	0	7447600	3578800	0	0	0	0	560850	0	15120700	0	1323400	0	0	0	0	0	0	207955000	0	0	531350	0	0	19163000	0	1450300	36333500	0	37060500	0	0	8067500	0	1091050	0	0	0	0	0	0
P03950	P03950	Angiogenin	ANG	6.993	752900000	20	0	0	0	0	0	25118000	0	0	0	0	0	0	0	3736950	0	0	0	0	0	0	0	0	16587500	0	0	0	0	0	0	0	0	0	0	0	0	0	0	0	0	0	0	1335100	0
P03952	P03952	Plasma kallikrein;Plasma kallikrein heavy chain;Plasma kallikrein light chain	KLKB1	8.2598	310660000	24	0	0	0	0	0	0	0	0	0	0	0	0	0	0	0	0	0	0	0	0	0	0	0	0	0	0	0	0	0	0	0	0	0	0	0	0	0	0	1598700	0	0	0	0
P03956	P03956	Interstitial collagenase;22 kDa interstitial collagenase;27 kDa interstitial collagenase	MMP1	6.0025	55194000	8	0	0	0	0	0	0	0	0	0	0	0	0	0	0	0	0	0	0	0	0	0	0	0	0	0	0	0	0	0	0	0	0	0	0	0	0	0	1417150	0	0	0	0	0
P03973	P03973	Antileukoproteinase	SLPI	323.31	64060000000	966	0	24416000	216385	27831500	55570000	0	0	155924500	0	222440000	0	0	0	6248000	13209000	10364100	0	15024500	0	0	2712300	0	0	39286500	0	89836000	10966550	54110000	137405000	13572500	36341000	178365000	0	906850	366205000	33443500	161580000	0	5012000	0	1616900	2363550	0
P04003;CON__Q28065	P04003	C4b-binding protein alpha chain	C4BPA	124.9	3300300000	179	0	0	0	0	0	0	0	0	0	0	0	0	0	0	1161000	0	0	0	0	0	0	0	8457500	0	0	1900850	0	0	0	0	0	0	0	0	0	0	0	0	0	0	0	0	7687500
P04004;CON__Q3ZBS7	P04004	Vitronectin;Vitronectin V65 subunit;Vitronectin V10 subunit;Somatomedin-B	VTN	70.39	7342900000	444	0	1770850	0	3566100	0	7698500	7336500	2511550	0	0	0	7967450	0	851150	4234500	0	0	1363300	10067000	0	2060800	4604450	8101000	0	0	0	0	0	2258700	866850	2843350	0	0	3449050	0	0	0	4469850	6358500	0	0	0	0
P04040	P04040	Catalase	CAT	323.31	22747000000	643	0	0	3160700	9265700	1671900	0	0	0	0	19859500	3733600	2866850	0	5793000	0	0	0	32122000	28373000	0	0	0	2650800	668000	0	51624500	2781550	1844250	2522500	0	0	1464400	13210800	16291000	4834950	10132000	246290	0	13419000	0	28097000	0	0
P04066	P04066	Tissue alpha-L-fucosidase	FUCA1	2.3062	48211000	12	2555550	0	0	0	0	0	0	0	0	0	0	0	0	0	0	0	0	0	0	0	0	0	0	0	0	0	0	0	0	0	0	0	0	0	0	2336100	0	0	713700	0	0	0	0
P04075	P04075	Fructose-bisphosphate aldolase A	ALDOA	184.96	15128000000	379	0	11673200	0	21316000	26594000	0	7795500	13368350	8972700	55965500	0	19965000	0	0	9422650	0	0	0	16922500	17090000	0	0	31186100	19719500	0	16185000	13630000	8097500	16100500	15779000	11907950	17433500	3363300	0	27697000	10952000	31366500	0	26339500	18821000	45257500	12302500	0
P04080	P04080	Cystatin-B	CSTB	222	8642200000	168	2354350	4461100	0	12470000	0	10370000	0	12999000	0	0	0	0	0	2250100	20873000	0	0	0	0	0	0	0	7917000	8177700	0	0	3958150	54740000	3426150	9003500	5640000	250750	6233500	0	40610500	0	1491350	0	0	0	0	14399500	0
P04083	P04083	Annexin A1	ANXA1	323.31	168940000000	5706	38746000	279405000	34634500	106000000	69994000	4705550	27366000	329365000	1962300	579570000	7860000	38387500	58755000	104328000	358580000	17861500	36691500	76502000	4866050	6188500	25862000	126827835	30580500	296940000	0	109225000	85761500	120929000	120960000	92796500	313950000	57464000	107597500	66781500	471275000	25932350	154065000	5093000	51683000	55381500	96581500	44370400	6234500
P04114;CON__ENSEMBL:ENSBTAP00000032840	P04114	Apolipoprotein B-100;Apolipoprotein B-48	APOB	256.04	10077000000	474	0	1972400	0	1462650	0	0	2755250	0	0	2246550	0	6740750	0	0	1550450	0	0	0	0	0	0	0	5689500	0	0	3330000	3344400	0	0	0	0	0	0	1932450	0	1339750	604200	8819700	0	0	0	0	0
P04155	P04155	Trefoil factor 1	TFF1	14.676	165540000	6	0	0	0	0	0	0	0	0	0	0	0	0	0	0	0	0	0	0	0	0	0	0	0	0	0	0	0	0	0	0	0	0	0	7715350	0	0	0	0	0	0	0	0	0
P04179	P04179	Superoxide dismutase [Mn], mitochondrial	SOD2	228.53	9862500000	132	0	5433500	0	3084650	2856650	0	0	0	0	0	0	0	0	3246400	0	0	0	0	13270500	0	0	0	0	3414400	0	21934000	5123750	0	0	4193450	0	9589550	0	3818650	1974200	0	2565500	0	16304500	0	17088500	0	0
P04196	P04196	Histidine-rich glycoprotein	HRG	99.659	2393600000	172	0	1523450	0	1208770	0	5718550	0	0	0	0	0	1693500	0	1328350	4098650	0	0	0	2483050	0	0	0	0	0	0	0	0	0	0	0	0	0	0	2511250	0	0	0	2768100	3347750	0	0	0	0
P04206	P04206	Ig kappa chain V-III region GOL		216.7	17040000	8	0	0	0	0	0	0	0	0	0	0	0	0	0	0	0	0	0	0	0	0	0	0	0	0	0	0	0	0	0	0	0	0	0	0	0	0	0	0	0	0	0	0	0
P04207	P04207	Ig kappa chain V-III region CLL		23.836	1173700000	259	0	2233700	0	0	0	0	0	0	0	0	0	0	0	2286200	0	6773500	3459450	0	0	0	0	0	0	2051050	0	0	0	0	0	0	0	0	0	3130850	0	0	0	0	730200	0	5984150	0	0
P04208	P04208	Ig lambda chain V-I region WAH		41.54	24854000000	1578	0	25615500	30536000	5973500	22208500	0	0	7545150	0	10934400	0	0	53097500	16650500	12027450	76191000	3421400	0	0	0	21146000	0	0	16379000	0	27595000	15666000	0	1800700	5862700	1687600	22887000	8079100	28844000	8328850	0	23226000	0	2977400	4184750	0	20393000	62917000
P04209	P04209	Ig lambda chain V-II region NIG-84		3.7794	120220000	7	0	0	0	0	0	0	0	0	0	0	0	0	0	2978300	0	0	0	0	0	0	0	0	0	0	0	0	0	0	0	0	0	0	0	0	0	0	0	0	0	0	0	0	0
P04211	P04211	Ig lambda chain V region 4A		6.6393	16057000000	476	0	7668000	9111500	2132950	2784500	0	12727000	10140000	0	10825250	0	0	18506000	14701000	14309500	9338500	0	3969900	22494500	0	1912100	0	24810000	9102350	0	5206050	3500000	0	0	6161700	0	13181000	0	2448300	22739500	0	5543850	0	68974000	0	0	4537550	8425000
P04217;CON__Q2KJF1	P04217	Alpha-1B-glycoprotein	A1BG	159.15	46409000000	1569	0	26825000	2231500	155646000	18871500	20049500	44155000	1482200	12852000	11248750	0	32455500	27633000	32331000	8516500	24087000	0	0	4210550	0	7107950	0	24891500	11219000	0	17830000	0	0	1089200	2351450	2856000	5908500	5996900	8568150	2923300	17392500	16437650	21761500	71614000	23965500	2906150	0	21321000
P04220	P04220	Ig mu heavy chain disease protein		160.28	0	0	0	0	0	0	0	0	0	0	0	0	0	0	0	0	0	0	0	0	0	0	0	0	0	0	0	0	0	0	0	0	0	0	0	0	0	0	0	0	0	0	0	0	0
P04229;Q29974;Q30154;Q30167	P04229;Q29974;Q30154;Q30167	HLA class II histocompatibility antigen, DRB1-1 beta chain;HLA class II histocompatibility antigen, DRB1-16 beta chain	HLA-DRB1;HLA-DRB5	2.3699	366010000	11	0	0	0	0	0	0	0	0	0	0	0	0	0	0	0	0	0	0	0	0	0	0	0	0	0	0	0	0	2607800	0	0	3878800	0	0	0	0	0	0	0	0	2653150	0	0
P04259;CON__H-INV:HIT000016045	P04259	Keratin, type II cytoskeletal 6B	KRT6B	44.035	11551000000	472	22428500	23300500	0	7157000	7286000	5312500	0	8925700	0	763850	0	0	8096000	11446000	57456500	0	0	6385000	0	0	15739000	4343850	17079000	27590000	0	10365100	22101500	5785500	12050000	21661000	24455500	11260050	34320500	8742750	13542500	67856500	3601250	0	0	0	11765000	19680500	0
P04280	P04280	Basic salivary proline-rich protein 1;Proline-rich peptide II-2;Basic peptide IB-6;Peptide P-H	PRB1	4.1029	141950000	6	0	0	0	0	0	0	0	0	0	0	0	0	0	0	0	0	0	0	0	0	0	0	0	0	0	0	0	0	0	0	0	0	0	0	0	0	0	0	0	0	0	0	0
P04406;O14556	P04406	Glyceraldehyde-3-phosphate dehydrogenase	GAPDH	323.31	8102300000	320	7655000	0	0	3039450	0	31108000	0	5715450	0	16319500	0	14606250	0	16614000	3405200	1033050	0	0	0	0	2928050	0	18058000	11978550	0	11462600	0	0	3082500	2153550	2636100	1490950	596950	0	76973500	0	4613700	0	0	4558800	0	12606000	3483400
P04430	P04430	Ig kappa chain V-I region BAN		86.255	0	0	0	0	0	0	0	0	0	0	0	0	0	0	0	0	0	0	0	0	0	0	0	0	0	0	0	0	0	0	0	0	0	0	0	0	0	0	0	0	0	0	0	0	0
P04431	P04431	Ig kappa chain V-I region Walker		24.659	1283600000	31	0	0	0	0	0	7546500	0	0	0	0	0	0	0	1051800	0	0	0	0	3317000	0	0	0	0	0	0	0	0	0	0	0	0	0	2475100	4265400	370805	0	0	11072300	5099500	0	0	0	0
P04433	P04433	Ig kappa chain V-III region VG		55.825	2464700000	72	0	0	0	0	0	0	0	0	0	19214000	0	0	0	0	0	0	0	0	0	0	0	0	0	0	0	0	0	0	0	0	0	0	0	0	0	0	0	0	0	0	0	0	0
P04434	P04434	Ig kappa chain V-III region VH		2.6638	0	1	0	0	0	0	0	0	0	0	0	0	0	0	0	0	0	0	0	0	0	0	0	0	0	0	0	0	0	0	0	0	0	0	0	0	0	0	0	0	0	0	0	0	0
P04438;P01814	P04438;P01814	Ig heavy chain V-II region SESS;Ig heavy chain V-II region OU		2.6975	1205000000	124	0	2741850	0	1670900	0	0	0	0	0	1394400	0	0	0	1554900	0	0	0	0	0	0	0	0	0	0	0	562100	0	0	0	0	0	3096650	0	3242300	5976800	0	1833900	0	0	0	0	0	0
P04439	P04439	HLA class I histocompatibility antigen, A-3 alpha chain	HLA-A	5.1306	19406000	3	0	0	0	0	0	0	0	0	0	0	0	0	0	0	0	0	0	0	0	0	0	0	0	0	0	0	0	0	0	0	0	0	0	0	0	0	0	0	0	0	0	0	0
P04632;Q96L46	P04632	Calpain small subunit 1	CAPNS1	29.811	674550000	39	0	0	0	0	0	0	0	0	0	1752450	0	0	0	0	0	0	0	0	0	0	0	0	0	0	0	0	0	0	0	0	0	0	0	0	6260000	0	0	0	0	0	7514500	0	0
P04745	P04745	Alpha-amylase 1	AMY1A	323.31	657920000000	14893	260779050	331580000	127985000	454465000	287295000	71660500	47637500	1155300000	0	184144000	0	49199000	10092000	1797550000	790215000	215026500	0	23435000	24077500	0	764885000	2639655	70003500	1091700000	0	213655000	590010000	150208300	500286000	1143650000	338970000	587220000	76148000	1329650000	983440000	150385000	132975000	23326550	69717500	0	0	486230000	12912000
P04792	P04792	Heat shock protein beta-1	HSPB1	323.31	17354000000	444	13178000	24983000	0	21694000	0	0	0	65832000	0	7119700	27303000	4075450	0	11850500	12520050	0	0	0	0	0	3041700	38041500	0	55518000	0	2587200	64023500	0	7905100	49557000	42113500	16789500	7617000	2497050	145275000	11446250	18035500	0	2031050	0	0	50012500	0
P04839;Q9Y5S8	P04839	Cytochrome b-245 heavy chain	CYBB	59.968	9544500000	480	0	4697600	5494500	3797000	3935650	0	0	0	0	6471700	0	10290400	0	2916400	2593050	0	0	1931450	0	0	0	0	3423800	4168700	0	8103100	1382900	6226500	1220600	2255300	1656900	1439750	0	2730550	1162000	18418000	1586850	0	11514000	0	12370000	0	0
P04843	P04843	Dolichyl-diphosphooligosaccharide--protein glycosyltransferase subunit 1	RPN1	14.831	875090000	65	0	0	0	0	0	0	0	266110	0	0	0	0	0	0	1316645	0	0	0	0	0	0	0	6198250	0	0	0	0	0	0	0	0	0	0	0	0	4212200	0	3001250	0	0	0	0	0
P04844	P04844	Dolichyl-diphosphooligosaccharide--protein glycosyltransferase subunit 2	RPN2	21.069	333290000	55	0	0	0	172830	0	1024950	0	389820	0	0	0	0	0	222365	1468180	0	0	685550	402470	0	0	0	2120950	121590	0	0	0	0	0	0	1049190	514525	0	0	0	0	0	0	0	0	0	0	0
P04899;P63096;P11488;P19087;A8MTJ3;P09471;P38405	P04899	Guanine nucleotide-binding protein G(i) subunit alpha-2	GNAI2	102.46	7693700000	163	0	8219600	0	6492350	0	0	0	0	0	8161800	0	9270000	0	1136950	7069950	0	0	10263000	0	0	0	0	0	3749300	0	13698000	2611600	0	1721150	0	2010800	2243550	0	2455550	2724200	0	3915100	4035000	14960000	0	0	0	0
P05023;P13637;P50993;Q13733;P54707;P20648	P05023;P13637	Sodium/potassium-transporting ATPase subunit alpha-1;Sodium/potassium-transporting ATPase subunit alpha-3	ATP1A1;ATP1A3	5.1956	102330000	8	0	0	0	0	0	0	0	0	0	0	0	0	0	0	0	0	0	0	0	0	0	0	0	0	0	0	0	0	0	0	0	0	0	0	0	0	0	0	0	0	0	0	0
P05089	P05089	Arginase-1	ARG1	36.533	1902200000	150	0	0	0	0	0	0	0	0	0	0	0	2738850	0	0	1768950	0	0	0	14006500	0	0	0	2278950	0	0	4640800	0	0	0	0	0	0	0	0	0	13335000	0	0	4246900	7086000	0	0	0
P05090	P05090	Apolipoprotein D	APOD	15.299	2816200000	120	0	0	0	0	2640500	0	0	0	42049000	4330500	0	0	0	0	0	0	0	0	0	0	0	0	0	1141950	20810500	2922350	6375500	9256000	0	0	0	0	0	0	3583000	12579500	0	0	0	0	0	0	0
P05091	P05091	Aldehyde dehydrogenase, mitochondrial	ALDH2	18.462	1276600000	90	0	0	0	0	0	1176050	0	0	0	0	0	0	0	0	0	0	0	0	2154850	10642500	0	0	0	2054300	0	1959900	1292250	0	0	990800	0	7491900	0	0	4263900	0	0	0	2306200	0	0	0	0
P05107	P05107	Integrin beta-2	ITGB2	323.31	14823000000	773	0	8606850	0	5614850	8982750	0	0	0	0	19245000	9447000	0	0	22339000	5351650	0	0	26193000	14829000	0	0	0	0	951250	0	57718500	13642500	0	1655250	590150	1665050	1889700	6281300	7359900	2152100	0	0	0	11008900	0	22870950	0	0
P05109	P05109	Protein S100-A8;Protein S100-A8, N-terminally processed	S100A8	323.31	603910000000	10446	0	174270000	75676500	493265000	55145000	29085000	11956000	59845000	0	1055015000	10097150	1200600	38151500	124396500	159267000	109437500	0	1916200000	3022500	0	28938500	0	6252485	497660000	10212500	1958050000	224415000	299155000	365307000	270408500	97574400	346565000	246973500	835910000	717010000	8147295	619315000	3002500	21802500	17201500	38190500	27987500	111251000
P05120	P05120	Plasminogen activator inhibitor 2	SERPINB2	38.09	399700000	38	0	0	0	0	0	0	0	0	0	1396600	0	0	0	3799050	0	0	0	0	0	0	0	0	0	1849150	0	0	0	0	0	0	0	0	0	0	651050	0	0	0	3183000	0	0	0	0
P05141	P05141	ADP/ATP translocase 2;ADP/ATP translocase 2, N-terminally processed	SLC25A5	25.187	5751700000	414	0	6225750	3515550	20449500	0	0	0	3020450	0	4594850	0	8095850	0	6691650	3483750	0	0	0	8648500	11849400	0	0	8232950	20386000	0	3947900	6679250	1054850	0	5483200	363650	3791800	0	1696200	22330500	0	4969300	0	5688500	0	0	4699250	0
P05154	P05154	Plasma serine protease inhibitor	SERPINA5	7.423	56538000	3	0	0	0	0	0	0	0	0	0	0	0	3372950	0	0	0	0	0	0	0	0	0	0	0	0	0	0	0	0	0	0	0	0	0	0	0	0	0	0	0	0	0	0	0
P05155	P05155	Plasma protease C1 inhibitor	SERPING1	323.31	13356000000	319	0	1546750	1942350	1891300	2625150	5560000	0	0	0	0	10593500	0	11453500	9800650	8956500	0	11078000	0	23833500	0	6585150	0	4499450	0	0	0	0	752300	2308750	2924550	0	11622000	5856550	6664000	5058700	0	782050	12065000	24686500	0	7763500	1747350	0
P05156;CON__Q32PI4	P05156	Complement factor I;Complement factor I heavy chain;Complement factor I light chain	CFI	5.9826	400350000	33	0	0	0	0	0	0	0	0	0	0	0	0	0	1308850	0	0	0	0	7693500	0	0	0	0	0	0	0	0	0	0	0	0	728900	0	0	0	0	0	0	921650	0	0	0	0
P05164	P05164	Myeloperoxidase;Myeloperoxidase;89 kDa myeloperoxidase;84 kDa myeloperoxidase	MPO	323.31	408430000000	13115	0	363810000	252160000	163095000	186160000	3681600	5340650	118665000	0	264720000	0	8333950	232725000	119800000	396125000	766140000	0	864300000	13590600	0	47891500	5848500	13194850	103935000	5298000	772865000	183110000	19345000	130115000	63108500	184990000	85114000	233935000	681275000	90127500	30729500	136450000	14921000	29167000	236334000	253071000	24569500	233120000
P05186	P05186	Alkaline phosphatase, tissue-nonspecific isozyme	ALPL	8.8299	81834000	11	0	0	0	0	0	0	0	0	0	0	0	0	0	0	579750	0	0	0	0	0	0	0	0	0	0	0	0	0	0	0	0	868395	0	0	0	0	0	0	0	0	0	0	0
P05204;Q15651	P05204	Non-histone chromosomal protein HMG-17	HMGN2	18.154	85165000	7	0	0	0	0	0	0	0	0	0	0	0	0	0	0	0	0	0	0	0	0	0	0	0	0	0	0	0	0	0	0	0	0	0	0	0	0	0	0	0	0	0	0	0
P05386	P05386	60S acidic ribosomal protein P1	RPLP1	9.7372	0	0	0	0	0	0	0	0	0	0	0	0	0	0	0	0	0	0	0	0	0	0	0	0	0	0	0	0	0	0	0	0	0	0	0	0	0	0	0	0	0	0	0	0	0
P05387	P05387	60S acidic ribosomal protein P2	RPLP2	35.188	1528700000	68	0	2409600	0	3249100	0	0	0	1762550	0	2909500	0	7362350	0	0	7655250	0	4528350	0	9871000	0	0	0	0	5714500	0	1534000	7683900	0	0	0	5116250	0	0	0	5561450	0	0	11663950	0	0	0	0	0
Q8NHW5;P05388	Q8NHW5;P05388	60S acidic ribosomal protein P0-like;60S acidic ribosomal protein P0	RPLP0P6;RPLP0	23.13	1255100000	98	0	3870500	0	2200000	0	2452050	0	1664500	0	599350	0	0	0	5459250	2597800	0	0	0	3328800	0	0	0	12444050	2533200	0	0	3087450	0	508350	2476000	2509900	1648850	0	0	1526300	6882000	1632150	0	0	0	0	0	0
P05534;P30455;P30443;Q09160	P05534;P30455;P30443	HLA class I histocompatibility antigen, A-24 alpha chain;HLA class I histocompatibility antigen, A-36 alpha chain	HLA-A	7.6874	36365000	3	0	0	0	0	0	0	0	0	0	0	0	0	0	0	0	0	0	0	0	0	0	0	0	0	0	0	0	0	0	0	0	0	0	0	0	0	0	0	0	0	0	0	0
P05546;CON__ENSEMBL:ENSBTAP00000018574	P05546	Heparin cofactor 2	SERPIND1	14.747	1252200000	125	0	0	0	0	0	0	0	0	0	0	0	0	0	0	0	0	0	0	0	0	0	0	0	0	0	0	0	0	0	0	0	0	0	0	0	0	0	0	0	0	0	0	0
P05771	P05771	Protein kinase C beta type	PRKCB	24.376	64839000	9	0	0	0	0	0	0	0	0	0	0	0	0	0	0	0	0	0	0	0	0	0	0	0	0	0	0	0	0	0	0	0	0	0	0	0	0	0	0	0	0	1195500	0	0
P05783	P05783	Keratin, type I cytoskeletal 18	KRT18	2.7324	115640000	5	0	0	0	0	0	0	0	0	0	3810800	0	0	0	0	0	0	0	0	0	0	0	0	0	0	0	0	0	0	0	0	0	0	0	0	0	0	0	0	0	0	0	0	0
P06310	P06310	Ig kappa chain V-II region RPMI 6410		88.658	539560000	18	0	0	0	0	0	0	0	0	0	0	0	0	0	0	0	0	0	0	0	0	0	0	5822000	0	0	0	0	0	0	0	0	0	0	0	2863250	0	0	0	0	0	0	0	0
P06311	P06311	Ig kappa chain V-III region IARC/BL41		9.8921	0	5	0	0	0	0	0	0	0	0	0	0	0	0	0	0	0	0	0	0	0	0	0	0	0	0	0	0	0	0	0	0	0	0	0	0	0	0	0	0	0	0	0	0	0
P06317;P01721	P06317	Ig lambda chain V-VI region SUT		3.775	220930000	9	0	0	0	0	0	0	0	0	0	0	0	0	0	0	1897850	0	0	0	0	0	0	0	0	0	0	0	0	0	0	0	0	0	0	0	0	0	0	0	0	0	0	0	0
P06318;P06319	P06318;P06319	Ig lambda chain V-VI region WLT;Ig lambda chain V-VI region EB4		9.2791	0	0	0	0	0	0	0	0	0	0	0	0	0	0	0	0	0	0	0	0	0	0	0	0	0	0	0	0	0	0	0	0	0	0	0	0	0	0	0	0	0	0	0	0	0
P06331;P01825	P06331;P01825	Ig heavy chain V-II region ARH-77;Ig heavy chain V-II region NEWM		29.492	6599800000	419	0	5170500	3790200	9629300	0	0	0	3047650	0	1766700	0	0	0	4169700	2205950	0	0	3185150	0	0	0	0	5324500	5879050	0	5605300	5257500	7573550	0	3687900	1473250	8556800	4484850	10146950	4855350	0	9169950	0	28887000	4426450	2670600	0	11443500
P06454	P06454	Prothymosin alpha;Prothymosin alpha, N-terminally processed;Thymosin alpha-1	PTMA	2.5913	28618000	3	0	0	0	0	0	0	0	0	0	0	0	0	0	0	0	0	0	1969300	0	0	0	0	0	0	0	0	0	0	0	0	0	0	0	0	0	0	0	0	0	0	1483400	0	0
P06576	P06576	ATP synthase subunit beta, mitochondrial	ATP5B	112.52	6076900000	321	0	6059450	0	3545550	0	15315000	5135000	6165650	0	5649300	0	0	0	4230100	862950	0	0	0	3557650	0	0	0	0	762200	0	1210500	2679200	0	0	3447750	3813700	3829200	1286950	2238450	3049250	10564500	1189900	13842500	17054000	0	13304500	3562500	0
P06681	P06681	Complement C2;Complement C2b fragment;Complement C2a fragment	C2	2.5658	11449000000	21	0	0	0	749600	0	0	0	0	0	0	0	1481450	0	0	0	0	0	0	4039100	0	0	0	0	0	0	0	0	0	0	0	0	0	0	0	0	0	1298150	0	2439600	0	0	0	0
P06702	P06702	Protein S100-A9	S100A9	323.31	221510000000	909	47198000	14726500	14071500	77130500	68865000	0	0	161380000	0	486800000	0	0	14996000	73785500	156735000	105904500	0	168450000	16017500	0	33667000	0	0	127480000	0	600545000	49696500	0	94885000	103580000	73650000	228825000	24617500	80715500	462835000	4100550	111295000	0	0	0	0	42581500	4989250
P06703	P06703	Protein S100-A6	S100A6	88.453	31641000000	307	0	0	871800	0	20903000	0	0	11612000	0	29707500	81133500	0	0	0	113508500	32163000	106928500	23689500	0	0	0	0	0	0	0	73012000	0	0	11171500	23921000	9957500	53180500	3520650	0	10430500	54557500	0	38042500	0	452400000	145535000	0	0
P06731	P06731	Carcinoembryonic antigen-related cell adhesion molecule 5	CEACAM5	41.8	2573700000	65	0	0	0	0	1735250	0	0	0	0	0	0	0	0	0	6845750	0	0	0	0	0	0	0	0	0	0	0	0	4452350	1096750	0	1851050	0	5192850	0	0	0	0	0	0	0	4402300	0	0
P06732	P06732	Creatine kinase M-type;Creatine kinase M-type, N-terminally processed	CKM	57.016	175750000	22	0	0	0	0	0	0	0	0	0	0	0	0	0	0	0	0	0	0	0	0	0	0	0	0	0	0	0	0	0	0	0	0	0	0	0	0	0	0	0	0	0	0	0
P06733;P13929	P06733	Alpha-enolase	ENO1	323.31	26544000000	1006	0	11005250	4284800	35769500	15631000	0	20416700	26938000	11419500	37577000	0	9665500	0	26945000	0	0	0	0	2287400	12520500	21129000	0	56414000	40694000	0	20069500	23918500	6650150	11929500	32351000	10398000	16750500	0	0	30160500	0	27242500	0	23716500	21482500	29239000	22337500	10192000
P06737;P11216	P06737	Glycogen phosphorylase, liver form	PYGL	33.281	800640000	78	0	0	358715	0	0	0	0	1107550	0	6718900	0	0	0	3104200	0	0	0	0	0	0	0	0	10965500	0	0	1508550	0	0	2351600	0	341740	0	0	0	2786400	0	0	0	0	0	6088000	0	0
P06744;Q8N196	P06744	Glucose-6-phosphate isomerase	GPI	323.31	18911000000	476	0	2646200	2477350	26323000	1336100	3608300	0	4137250	5404500	16999500	0	14247500	0	22359000	14719000	0	0	44152500	0	0	0	0	0	6323550	0	50957000	5518500	0	2725950	4024950	0	9493000	0	0	11835500	0	8121650	0	12490500	40996000	31682000	13679800	8358500
P06748	P06748	Nucleophosmin	NPM1	33.198	321030000	20	0	0	0	0	0	0	0	0	0	0	0	0	0	0	0	0	0	0	0	0	0	0	0	0	0	1599000	0	0	0	0	0	0	0	0	1187550	0	0	0	0	0	0	0	0
P06753	P06753	Tropomyosin alpha-3 chain	TPM3	46.611	2878500000	136	5249000	1888050	0	5872700	7760950	7628450	0	4450150	0	22363500	0	7291500	0	1743700	8559000	0	0	0	0	0	2240750	0	13082500	2948300	7597500	0	4542800	3822150	7199200	6757500	8071450	5858200	4939050	0	1610900	9475950	3246950	0	0	0	0	0	0
P06865	P06865	Beta-hexosaminidase subunit alpha	HEXA	4.5544	194130000	32	0	0	0	0	0	0	0	0	0	0	0	1407750	0	0	0	0	0	0	0	0	0	0	0	0	0	0	0	0	0	0	0	0	0	0	0	0	0	0	0	0	0	2311500	0
P06870	P06870	Kallikrein-1	KLK1	54.006	6415600000	351	0	12169500	0	4691950	9193400	0	0	11900350	0	4809300	0	0	7301000	5384600	11034400	0	0	11672650	0	0	0	1852800	0	9743250	0	5017000	2200000	15391200	14644500	12621000	19421000	5485500	0	6694250	5157400	2855800	3076600	0	7774850	0	4295900	10153000	0
P06888	P06888	Ig lambda chain V-I region EPS		10.704	75461000	2	0	0	0	0	0	0	0	0	0	0	0	0	0	0	0	0	0	0	0	0	0	0	0	0	0	0	0	0	0	0	0	0	0	0	0	0	0	0	0	0	0	0	0
P06889	P06889	Ig lambda chain V-IV region MOL		3.6565	0	1	0	0	0	0	0	0	0	0	0	0	0	0	0	0	0	0	0	0	0	0	0	0	0	0	0	0	0	0	0	0	0	0	0	0	0	0	0	0	0	0	0	0	0
Q16778;P33778;P23527;P06899;Q8N257;Q96A08	Q16778;P33778;P23527;P06899;Q8N257	Histone H2B type 2-E;Histone H2B type 1-B;Histone H2B type 1-O;Histone H2B type 1-J;Histone H2B type 3-B	HIST2H2BE;HIST1H2BB;HIST1H2BO;HIST1H2BJ;HIST3H2BB	18.399	8475200000	142	0	7887350	0	15268000	0	0	0	7741800	0	5373250	0	0	0	1539600	13947000	0	0	0	0	0	4124650	0	0	8035350	0	7542100	15348000	0	9736000	6305200	3965850	4223850	0	0	4058200	0	8838450	0	0	0	0	6074650	0
P07098	P07098	Gastric triacylglycerol lipase	LIPF	29.23	495300000	64	0	0	0	0	0	0	0	0	0	0	0	0	0	0	0	0	0	0	0	0	0	0	0	0	0	0	0	0	0	0	0	0	0	0	0	0	0	7070600	0	0	0	0	0
P07099	P07099	Epoxide hydrolase 1	EPHX1	6.3511	456420000	41	0	0	0	499585	0	3481200	0	868640	0	0	0	2008550	0	2262850	0	0	0	0	0	0	0	0	3877150	276205	0	0	0	0	0	798850	0	396030	0	0	1299600	0	0	0	1957450	0	0	0	0
P07108	P07108	Acyl-CoA-binding protein	DBI	67.474	1071800000	48	0	0	0	2479300	0	2789300	0	0	0	1839250	0	0	0	4066350	0	0	0	0	7343750	0	0	0	0	3965900	0	855300	0	0	0	2865350	0	0	0	0	4278800	0	0	0	0	0	0	0	0
P07195;Q6ZMR3	P07195	L-lactate dehydrogenase B chain	LDHB	69.087	1710100000	109	0	1383450	0	2905000	0	3575300	0	0	0	1603950	0	0	0	2500800	4749150	0	0	0	2305300	0	0	4368150	0	1129850	0	5038050	0	0	0	0	0	2275650	0	0	7046150	0	1799750	0	0	0	0	0	0
P07225	P07225	Vitamin K-dependent protein S	PROS1	4.171	603950000	17	0	0	0	0	0	0	0	0	0	0	0	0	0	0	0	0	0	0	0	0	0	0	0	0	0	732100	0	0	0	0	0	0	0	0	0	0	0	0	1822500	0	0	0	0
P07237	P07237	Protein disulfide-isomerase	P4HB	323.31	10780000000	647	0	24066500	2737350	12419900	7446950	2002850	0	11197100	0	12582900	0	0	0	23003950	10556200	0	5221500	18007600	0	0	7459000	0	8612500	12023000	0	5648500	19129800	0	13805000	15409000	28354000	14021500	1913550	4621300	27503000	8387500	8827350	0	1708200	0	36530000	3795200	0
P07339	P07339	Cathepsin D;Cathepsin D light chain;Cathepsin D heavy chain	CTSD	109.97	12523000000	702	0	11816800	5689150	3930800	0	12597500	0	4241900	0	7331000	0	25388000	0	26646500	10678150	5423000	0	0	34635500	0	15044000	0	11958500	3457600	0	11188750	2709700	0	5045700	4259800	0	11983500	0	11955000	25161000	22004500	6425600	36718500	12112000	0	0	38420500	59739500
P07355;A6NMY6	P07355;A6NMY6	Annexin A2;Putative annexin A2-like protein	ANXA2;ANXA2P2	323.31	49924000000	2084	42662000	87777000	7988050	61733000	12674000	43471000	26904500	55899000	11869500	99465500	21957000	25369500	4712700	71011000	108895000	0	5662500	19720500	57791000	0	10923450	84835500	46085500	62173500	0	35401000	49240500	5506000	27959500	81324000	77663500	80003500	34104500	18426000	78317500	70568000	34601500	21131500	33180000	0	15683400	48368000	0
P07357	P07357	Complement component C8 alpha chain	C8A	4.294	17230000	2	0	0	0	0	0	0	0	0	0	0	0	0	0	0	0	0	0	0	0	0	0	0	0	0	0	0	0	0	0	0	0	0	0	0	0	0	0	0	0	0	0	0	0
P07360	P07360	Complement component C8 gamma chain	C8G	7.4056	308310000	17	0	0	0	0	0	0	0	0	0	0	0	0	0	0	0	0	0	0	0	0	0	0	0	0	0	0	0	0	0	0	0	0	0	0	0	0	0	0	0	0	0	0	0
P07384	P07384	Calpain-1 catalytic subunit	CAPN1	46.572	3731400000	177	0	7961350	0	3510150	0	5351500	0	3025950	0	5015400	0	4111000	0	5638000	4252300	0	0	0	6643500	0	0	0	24407000	9102550	0	710750	0	0	0	11728500	0	0	0	0	2207000	17244500	4774000	20107000	8964150	0	0	0	18690500
P07437	P07437	Tubulin beta chain	TUBB	323.31	15519000000	1097	0	15533500	9796600	28551000	6890550	40819000	6221000	9820150	11520000	7711800	9852250	3003650	0	26540000	7272700	9913000	0	1289500	12851600	0	3241200	16443650	21250000	15737000	0	6288250	9700100	0	7751950	12495000	11406000	12542650	3975950	0	35873500	20155550	9483150	23439000	7746550	6285000	0	15625000	21778000
P07476	P07476	Involucrin	IVL	218.86	2853300000	86	0	0	0	0	0	0	0	20164500	0	1502350	0	0	0	0	0	0	0	0	0	0	0	0	14259000	19603000	0	0	0	0	9546550	6927950	34117500	0	4487750	0	18648000	3878900	0	0	0	0	0	0	0
P07602	P07602	Prosaposin;Saposin-A;Saposin-B-Val;Saposin-B;Saposin-C;Saposin-D	PSAP	81.357	22098000000	915	1206800	11029900	0	17271000	14677500	0	0	3925000	0	2740400	4735850	43271500	0	32391000	42022000	6680000	0	8389100	2313050	0	50227500	9546000	25622500	7750600	0	28755000	42884500	0	32677500	13060750	8664550	65846000	16150700	12268700	38223000	10886450	8738650	6210500	22027500	0	0	61354500	0
P07686	P07686	Beta-hexosaminidase subunit beta;Beta-hexosaminidase subunit beta chain B;Beta-hexosaminidase subunit beta chain A	HEXB	12.454	1153400000	65	0	0	0	1447900	0	0	0	0	0	0	0	0	0	1616300	0	0	0	0	0	0	2221150	0	0	981910	0	0	2148500	0	0	284830	0	1511000	0	1584300	1009450	0	2070650	0	14602500	0	0	1432450	0
P07711	P07711	Cathepsin L1;Cathepsin L1 heavy chain;Cathepsin L1 light chain	CTSL	3.9637	132220000	16	3415900	0	0	0	0	0	0	0	0	0	0	0	0	2995500	0	0	0	0	0	0	1157300	0	0	0	0	0	0	0	0	0	0	0	0	0	0	0	0	0	0	0	0	0	0
P07737;CON__P02584	P07737	Profilin-1	PFN1	289.84	16137000000	399	0	5970500	1366250	16106500	0	0	0	9355000	0	13703700	0	23082500	0	21068000	16769000	5549000	0	5508500	5713500	0	0	0	28094000	0	0	13313000	0	0	7866500	4403400	0	17400500	0	0	16716500	8018500	28939000	0	10503500	0	8476500	13497000	11348500
P07738	P07738	Bisphosphoglycerate mutase	BPGM	5.0196	6373400	2	0	0	0	0	0	0	0	0	0	0	0	0	0	0	0	0	0	0	0	0	0	0	0	0	0	0	0	0	0	0	0	0	0	0	0	0	0	0	0	0	0	0	0
P07741	P07741	Adenine phosphoribosyltransferase	APRT	2.2261	152140000	17	0	0	0	0	0	0	0	0	0	0	0	0	0	0	0	0	0	0	0	0	0	0	0	0	0	0	0	0	0	0	0	0	0	0	700050	0	0	0	0	0	0	0	0
P07858	P07858	Cathepsin B;Cathepsin B light chain;Cathepsin B heavy chain	CTSB	16.688	4040100000	77	0	5547500	0	4901400	0	4917100	0	0	0	7172950	0	0	0	20757000	0	0	0	0	0	0	5219000	24095000	0	5425550	0	955200	5840250	0	2418650	5583500	0	1806350	0	0	5087750	22719500	12369150	0	15649500	0	0	14889000	0
P07900;Q14568;Q58FG0;Q58FG1	P07900	Heat shock protein HSP 90-alpha	HSP90AA1	121.16	12679000000	512	4819250	15903500	0	15084500	13581000	0	0	7608300	0	11766500	0	16273000	121175000	14351500	14319500	0	8610000	0	8385500	16608000	0	0	12541500	14726000	0	4585250	18687450	5702000	11161000	15405000	28733500	21680000	12674800	0	19730500	0	11443000	0	40668500	0	0	10229000	0
P07910;P0DMR1;O60812;B7ZW38;B2RXH8;Q86SE5	P07910	Heterogeneous nuclear ribonucleoproteins C1/C2	HNRNPC	10.809	1568600000	33	0	1298850	0	1004000	0	0	0	0	0	2180300	0	0	0	0	0	0	0	0	0	0	0	0	0	796300	0	0	2516200	0	0	0	0	0	0	0	709750	0	0	0	1558350	0	0	0	0
P07911	P07911	Uromodulin;Uromodulin, secreted form	UMOD	7.2825	40789000	9	0	0	0	0	0	0	0	0	0	0	0	0	0	0	0	0	0	0	0	0	0	0	0	0	0	0	0	0	0	0	0	0	0	0	0	0	0	0	0	0	0	0	0
P07948	P07948	Tyrosine-protein kinase Lyn	LYN	9.668	131930000	15	0	0	0	0	0	0	0	0	0	0	0	0	0	0	0	0	0	1960300	0	0	0	0	0	0	0	0	0	0	0	0	0	0	0	0	0	0	0	0	0	0	0	0	0
P07988	P07988	Pulmonary surfactant-associated protein B	SFTPB	323.31	27863000000	795	0	7897450	14244000	0	0	30647500	0	0	0	0	132940000	29842500	0	46561500	0	9101500	0	1759200	6297500	44680000	18525500	24799000	0	7377700	4495850	10447800	7075200	2935100	15595000	12318600	0	197330000	3833250	10189150	5965500	17174500	13351000	14903500	25996000	0	10675000	39242500	0
P07998	P07998	Ribonuclease pancreatic	RNASE1	24.513	25838000	7	0	0	0	0	0	0	0	0	0	0	0	0	0	0	0	0	0	0	0	0	0	0	0	0	0	0	0	0	0	0	0	718250	0	0	0	0	0	0	0	0	0	0	0
P08118	P08118	Beta-microseminoprotein	MSMB	5.7967	14354000000	300	0	18430000	0	3072300	3717950	0	0	7004950	16678000	0	0	12501500	0	86084000	14717500	0	0	0	0	0	17622500	0	5362500	1980900	0	9012300	57040500	0	4433800	9827300	0	32916000	4285300	12136500	22065000	0	16375500	0	6541400	0	0	14148500	0
P08133	P08133	Annexin A6	ANXA6	323.31	24839000000	844	2099700	7647900	1704400	5249300	0	16465000	0	0	0	6385000	0	31226500	0	9773100	2757400	0	0	7961050	26422450	0	0	0	23457500	0	0	60394000	0	0	1590050	0	0	1152740	3642650	20696500	1457250	0	1227600	18747300	1806150	11278500	22382500	0	0
P08174	P08174	Complement decay-accelerating factor	CD55	13.817	1802600000	69	0	3199750	0	0	0	0	0	0	0	0	0	0	0	6093200	2015700	0	0	0	2751050	0	0	0	0	2220200	0	2601750	0	0	0	0	0	4116850	0	4070350	3091150	0	1476050	0	14880000	0	6572500	0	0
P08185	P08185	Corticosteroid-binding globulin	SERPINA6	16.737	1853100000	53	0	0	0	0	0	0	0	0	0	0	0	0	0	0	0	0	0	0	0	0	0	0	0	0	0	0	0	0	0	0	0	0	0	0	0	0	0	10513000	3175300	0	0	0	0
P08195	P08195	4F2 cell-surface antigen heavy chain	SLC3A2	2.2012	116070000	9	0	0	0	0	0	0	0	0	0	0	0	0	0	0	0	0	0	0	0	0	0	0	1146050	0	0	0	0	0	0	0	0	0	0	0	0	4502850	0	0	0	0	0	0	0
P08238;Q58FF7	P08238	Heat shock protein HSP 90-beta	HSP90AB1	75.373	1742800000	81	0	0	0	4030900	0	0	0	0	0	4364500	0	0	0	0	0	0	0	0	0	0	0	0	6188500	5216100	0	0	0	0	2580600	3805600	5052100	7864000	2642550	0	5465600	0	0	2627300	0	0	9931000	0	0
P08246	P08246	Neutrophil elastase	ELANE	323.31	361790000000	3566	0	146730000	108554500	112320000	122445000	0	0	97195500	0	590590000	0	0	19127500	78406000	251062000	199287000	0	457005000	0	0	41665500	0	0	314440000	93975000	763215000	125030000	0	108629000	51111000	63836500	80156000	31741000	300075000	177425000	0	226125000	0	26537000	23521500	4882250	33583500	105243500
P08294	P08294	Extracellular superoxide dismutase [Cu-Zn]	SOD3	5.9942	40571000	2	0	0	0	0	0	0	0	0	0	0	0	0	0	0	0	0	0	0	0	0	0	0	0	0	0	0	0	0	0	0	0	0	0	0	0	0	0	0	0	0	0	0	0
P08311	P08311	Cathepsin G	CTSG	323.31	266270000000	7312	2444050	287080000	87344000	47790500	117620000	0	5414000	60222500	19493550	328945000	0	6223535	25928000	78390500	351635000	259170000	0	422770000	0	39201500	27143000	0	48979500	94544000	0	777085000	145042000	15830000	48819000	25785000	65288500	70693500	64379000	221210000	109244000	0	88919000	0	40292000	6020000	20866000	6362750	173300000
P08473	P08473	Neprilysin	MME	2.7122	215560000	7	0	0	0	0	0	0	0	0	0	0	0	0	0	0	0	0	0	0	0	0	0	0	0	0	0	0	0	0	0	0	0	0	0	1134150	0	0	0	0	4546400	0	0	0	0
P08493	P08493	Matrix Gla protein	MGP	28.31	0	0	0	0	0	0	0	0	0	0	0	0	0	0	0	0	0	0	0	0	0	0	0	0	0	0	0	0	0	0	0	0	0	0	0	0	0	0	0	0	0	0	0	0	0
P08519	P08519	Apolipoprotein(a)	LPA	12.175	558820000	18	0	0	0	0	0	0	0	0	0	0	0	0	0	0	0	0	0	0	0	0	0	0	0	0	0	0	0	0	0	0	0	0	0	0	0	0	0	0	0	0	0	0	0
P08567	P08567	Pleckstrin	PLEK	4.1844	32073000	5	0	0	0	0	0	0	0	0	0	0	0	0	0	0	0	0	0	0	0	0	0	0	0	0	0	0	0	0	0	0	0	0	0	0	0	0	0	0	0	0	0	0	0
P08571	P08571	Monocyte differentiation antigen CD14;Monocyte differentiation antigen CD14, urinary form	CD14	64.464	671530000	54	0	0	0	2706300	0	11498900	0	0	0	0	0	0	0	2831150	0	0	0	0	0	0	1649650	0	0	0	0	0	0	0	0	0	0	0	0	0	0	6938400	0	0	0	0	0	4971350	0
P08575	P08575	Receptor-type tyrosine-protein phosphatase C	PTPRC	29.777	1515700000	63	0	0	0	0	0	0	0	0	0	3524300	0	0	0	5186000	0	0	0	0	0	0	0	0	0	0	0	0	0	0	0	0	0	0	0	0	0	0	0	0	1982700	0	8644150	0	0
P08590	P08590	Myosin light chain 3	MYL3	3.5688	62945000	5	0	0	0	0	0	0	0	0	0	0	0	0	0	0	0	0	0	0	0	0	0	0	0	0	0	0	0	0	0	0	0	0	0	0	0	0	0	0	0	0	0	0	0
P08603;Q02985	P08603	Complement factor H	CFH	151.55	13293000000	441	0	3308350	0	5958550	3579400	13795000	22848500	655950	8878000	3807950	0	11551100	0	19170000	3868400	0	3673300	0	2112200	0	9481350	4174800	7707000	0	0	5494100	5366550	0	7698250	1615050	0	16142500	4944200	3759800	3872700	9215500	6147850	21916150	9989250	14573000	0	4043350	0
P08621	P08621	U1 small nuclear ribonucleoprotein 70 kDa	SNRNP70	2.2658	24920000	3	0	0	0	0	0	0	0	0	0	0	0	0	0	0	0	0	0	0	0	0	0	0	614750	659340	0	0	0	0	0	0	0	0	0	0	0	0	0	0	0	0	0	0	0
P08631	P08631	Tyrosine-protein kinase HCK	HCK	7.2123	234870000	7	0	0	0	0	0	0	0	0	0	0	0	0	0	0	0	0	0	0	0	0	0	0	0	0	0	0	0	0	0	0	0	0	0	0	0	0	0	0	0	0	0	0	0
P08670;P41219	P08670	Vimentin	VIM	323.31	26800000000	1046	9455150	2701900	0	33925500	39036500	18142000	0	1648400	7351000	3985350	3493700	30722500	2464000	13718250	42856500	0	0	0	32964000	26229000	28269500	27554500	40399500	1170100	0	6508050	9917350	6225000	64585000	55752500	8501650	151895000	15231000	0	17004500	23021000	8910850	9475900	852100	0	12758000	25938000	8848550
P08697;CON__P28800	P08697	Alpha-2-antiplasmin	SERPINF2	181.92	2135100000	139	0	0	0	1245800	0	0	2673550	0	0	0	0	0	0	0	0	0	0	0	0	0	0	0	0	0	0	0	0	0	0	0	0	0	0	0	0	0	630950	5255500	6856800	0	0	0	0
P08758	P08758	Annexin A5	ANXA5	323.31	20286000000	936	1956750	14931450	0	8922900	0	4738300	0	3111850	9311500	6630250	0	5455750	0	10360250	21926000	0	0	4720950	1449250	0	1065500	11429000	10092050	415200	0	22067500	4014500	0	2427400	3794400	3939600	31884000	2137800	8723650	11260000	24898000	0	25893000	4851900	0	7415000	5324300	27292000
P08865	P08865	40S ribosomal protein SA	RPSA	46.19	207990000	24	0	0	0	0	0	0	0	0	0	1062000	0	0	0	0	0	0	0	0	0	0	0	0	6607500	1464700	0	0	0	0	0	0	0	0	0	0	2134850	0	0	0	0	0	0	0	0
P08962	P08962	CD63 antigen	CD63	36.34	629600000	16	0	0	0	0	0	0	0	0	0	0	0	0	0	0	0	0	0	2009700	0	0	0	0	0	0	0	0	0	0	0	0	0	0	0	0	0	0	0	0	0	0	2217500	0	0
P09110	P09110	3-ketoacyl-CoA thiolase, peroxisomal	ACAA1	2.9314	93283000	5	0	0	0	0	0	0	0	0	0	0	0	0	0	0	0	0	0	0	0	0	0	0	4898050	0	0	0	0	0	0	0	0	0	0	0	0	0	0	0	0	0	0	0	0
P09210;P08263;Q16772;Q7RTV2	P09210;P08263;Q16772	Glutathione S-transferase A2;Glutathione S-transferase A1;Glutathione S-transferase A1, N-terminally processed	GSTA2;GSTA1;GSTA3	21.9	5565000000	217	0	1815700	0	4243250	1488750	0	0	0	0	2327800	0	0	0	4995800	2460300	0	0	0	0	0	0	0	0	876850	0	3565750	1460100	0	0	958500	0	7116850	0	0	32752000	0	4139700	0	59364000	0	6812000	3131450	19386000
P09211	P09211	Glutathione S-transferase P	GSTP1	323.31	24908000000	401	0	41351500	4391350	35078000	14523050	0	0	30479500	0	28554000	0	0	0	42623000	28127500	0	0	0	0	0	9921250	0	64740000	53097500	0	23891000	28163000	3326000	24062000	39587500	23347000	18539500	11338500	0	27328500	10827500	66290500	0	59404500	0	0	102855000	13265000
P09228	P09228	Cystatin-SA	CST2	323.31	15313000000	185	36860500	0	0	4392350	187575000	11475500	0	18094000	0	7989050	0	0	0	17167000	0	0	0	0	0	0	7335000	0	10411500	8793950	0	0	0	65580000	44061500	113725000	0	61930500	1495350	0	0	0	2623100	0	0	0	13300000	19111500	0
P09382	P09382	Galectin-1	LGALS1	43.952	143280000	9	0	0	0	0	0	0	0	0	0	0	0	0	0	0	0	0	0	0	0	0	0	0	0	0	0	0	0	0	0	0	0	2092650	0	0	0	0	0	0	0	0	0	0	0
P09429;B2RPK0	P09429;B2RPK0	High mobility group protein B1;Putative high mobility group protein B1-like 1	HMGB1;HMGB1P1	5.6373	620560000	15	0	0	0	693165	0	0	0	0	0	0	0	0	0	4659550	0	0	0	0	0	0	0	0	0	0	0	0	0	0	0	0	0	0	0	0	0	0	959150	0	0	0	0	0	0
P09467	P09467	Fructose-1,6-bisphosphatase 1	FBP1	123.82	1058800000	90	0	0	0	0	0	10056750	0	0	0	0	0	0	0	683450	0	0	0	0	0	0	3450250	0	16351500	0	0	0	0	0	1122800	0	0	3516800	0	0	0	0	0	0	0	0	0	5367150	0
Q03013;P09488;P46439;P21266	Q03013;P09488;P46439	Glutathione S-transferase Mu 4;Glutathione S-transferase Mu 1;Glutathione S-transferase Mu 5	GSTM4;GSTM1;GSTM5	2.5752	32471000	3	0	0	0	0	0	0	0	0	0	0	0	0	0	0	0	0	0	0	0	0	0	0	0	0	0	0	0	0	0	0	0	0	0	0	0	0	0	0	1859800	0	0	0	0
P09493	P09493	Tropomyosin alpha-1 chain	TPM1	2.8352	11475000	1	0	0	0	0	0	0	0	0	0	0	0	0	0	0	0	0	0	0	0	0	0	0	0	0	0	0	0	0	0	0	0	0	0	0	0	0	0	0	0	0	0	0	0
P09525	P09525	Annexin A4	ANXA4	288.61	5579900000	398	0	3068300	852195	0	1774100	0	0	1063300	0	1855250	0	6138700	0	6393800	2863150	0	0	7870250	11734000	0	0	0	7813950	0	0	2456400	0	0	0	0	2254250	0	0	1322850	2267650	2538750	0	3303300	0	7166000	28019500	0	0
P09668	P09668	Pro-cathepsin H;Cathepsin H mini chain;Cathepsin H;Cathepsin H heavy chain;Cathepsin H light chain	CTSH	9.0491	341180000	30	0	0	0	0	0	0	0	0	0	0	0	0	0	0	0	0	0	0	0	0	0	0	0	0	0	1730700	0	0	0	0	0	1306450	0	0	0	0	0	0	3165050	0	0	0	0
P09758	P09758	Tumor-associated calcium signal transducer 2	TACSTD2	17.062	153640000	20	0	0	0	0	0	0	0	216040	0	0	0	0	0	0	0	0	0	0	0	0	0	0	0	0	0	0	573250	0	0	1584750	2792150	0	0	0	0	0	0	0	0	0	0	0	0
P09769	P09769	Tyrosine-protein kinase Fgr	FGR	27.739	944310000	42	0	0	0	0	0	0	0	0	0	0	0	0	0	0	0	0	0	0	0	0	0	0	0	0	0	0	0	0	0	0	0	0	0	0	0	3482950	0	8635250	0	0	0	0	0
P09871	P09871	Complement C1s subcomponent;Complement C1s subcomponent heavy chain;Complement C1s subcomponent light chain	C1S	2.4037	21390000	5	0	0	0	0	0	0	0	0	0	0	0	0	0	0	0	0	0	0	0	0	0	0	0	0	0	0	0	0	0	0	0	0	0	0	0	0	0	0	0	0	0	0	0
P09917	P09917	Arachidonate 5-lipoxygenase	ALOX5	57.973	779310000	39	0	0	0	0	0	824700	0	0	0	0	0	0	0	0	1109750	0	0	0	0	0	0	0	2162900	0	0	0	0	0	0	0	0	0	0	0	0	15092500	0	2008600	0	0	0	0	0
P09960	P09960	Leukotriene A-4 hydrolase	LTA4H	48.227	3137700000	168	7526000	0	0	5533300	0	11347350	0	1354150	19378000	6038450	0	4346150	5245500	5278100	0	0	0	0	10903000	0	0	3992400	6985000	2441750	0	5450150	1307750	0	5778350	5652300	1569400	5640800	0	0	1142650	3094800	0	0	0	0	16872000	5393000	0
P09972	P09972	Fructose-bisphosphate aldolase C	ALDOC	42.331	648270000	65	0	0	0	1210650	913550	0	0	0	0	0	0	5455000	0	2387000	0	0	0	1621950	3451850	0	0	0	5152000	0	0	0	0	0	2767900	1736550	2627600	818400	0	0	0	0	3038850	0	0	0	0	0	0
P0C0L4;CON__ENSEMBL:ENSBTAP00000007350;CON__P01030	P0C0L4	Complement C4-A;Complement C4 beta chain;Complement C4-A alpha chain;C4a anaphylatoxin;C4b-A;C4d-A	C4A	14.748	1861900000	130	0	0	0	0	0	10722950	6041000	0	0	0	0	1833300	17399000	0	0	0	0	0	5717000	0	0	0	0	0	0	0	0	0	0	0	0	0	0	0	0	1877200	0	0	2881250	0	0	0	16180500
P0C0L5	P0C0L5	Complement C4-B;Complement C4 beta chain;Complement C4-B alpha chain;C4a anaphylatoxin;C4b-B;C4d-B	C4B	323.31	47295000000	1579	0	5858450	0	3302200	2255150	10454800	18981000	0	0	8245300	0	32959000	0	31431500	14575500	6347500	12682500	0	46619500	0	21424600	6249350	41254000	0	0	6480050	0	0	6601600	3114700	1290600	104385000	5137800	10934650	6922450	3242700	3076700	27420000	26761500	0	0	6924650	0
Q71UI9;P0C0S5	Q71UI9;P0C0S5	Histone H2A.V;Histone H2A.Z	H2AFV;H2AFZ	33.654	70572000	5	0	0	0	0	0	0	0	0	0	0	0	0	0	0	0	0	0	0	0	0	0	0	0	0	0	0	0	0	0	0	0	0	0	0	0	0	0	0	0	0	0	0	0
Q99878;Q96KK5;Q9BTM1;P0C0S8	Q99878;Q96KK5;Q9BTM1;P0C0S8	Histone H2A type 1-J;Histone H2A type 1-H;Histone H2A.J;Histone H2A type 1	HIST1H2AJ;HIST1H2AH;H2AFJ;HIST1H2AG	302.23	149860000000	2882	0	73305500	127576500	343660000	48681000	7384150	0	45933500	0	90985050	0	0	0	29750500	156078500	28155500	0	0	0	0	49208500	0	115570	145830000	0	102152000	207600000	0	47861000	24880000	23650500	77256000	30546500	0	426505000	0	81343000	0	124490000	0	0	229335000	627092500
P0CG05;P0CG06	P0CG05;P0CG06	Ig lambda-2 chain C regions;Ig lambda-3 chain C regions	IGLC2;IGLC3	323.31	169270000000	8118	0	106526000	183265000	64057000	123697000	549450	0	93706000	10420900	64768500	0	25536000	2184400	220215000	143680000	368970000	10990000	160420000	46628000	0	132905500	0	8149900	142332500	0	86080500	57414500	122765000	110347000	56536500	74938000	176920000	91856000	229605000	81613500	0	97409000	0	107601000	12465000	77470000	102983000	0
P0DJD9;P0DJD8;P0DJD7	P0DJD9;P0DJD8;P0DJD7	Pepsin A-5;Pepsin A-3;Pepsin A-4	PGA5;PGA3;PGA4	3.6834	47695000	27	0	0	0	0	0	0	0	0	0	0	0	0	0	0	0	0	0	0	0	0	0	0	0	0	0	0	0	0	0	0	0	0	0	0	0	0	0	0	0	0	0	0	0
P0DJI8	P0DJI8	Serum amyloid A-1 protein;Amyloid protein A;Serum amyloid protein A(2-104);Serum amyloid protein A(3-104)	SAA1	26.23	91760000	7	0	0	0	0	0	0	0	0	0	0	0	0	0	0	0	0	0	0	1259000	0	0	0	0	0	0	0	0	0	0	134945	0	0	0	0	0	0	0	0	0	0	0	0	0
P0DJI9	P0DJI9	Serum amyloid A-2 protein	SAA2	3.9705	0	0	0	0	0	0	0	0	0	0	0	0	0	0	0	0	0	0	0	0	0	0	0	0	0	0	0	0	0	0	0	0	0	0	0	0	0	0	0	0	0	0	0	0	0
P0DMV9;P0DMV8	P0DMV9;P0DMV8	Heat shock 70 kDa protein 1B;Heat shock 70 kDa protein 1A	HSPA1B;HSPA1A	183.34	11850000000	441	0	7456800	0	6170450	3612750	2623700	0	12134800	0	7942450	14274500	0	0	21462500	7032000	0	0	6900100	0	0	2460100	0	8659500	9283500	0	29274500	13888000	0	9428050	12233350	14490000	2939250	1946100	423100	16532500	0	6791450	0	12133000	0	0	7180400	0
P10153	P10153	Non-secretory ribonuclease	RNASE2	41.793	1399600000	52	0	0	0	1862000	808750	0	0	0	0	0	0	8323500	0	0	0	0	0	0	0	0	0	0	23765000	0	0	4850150	0	0	0	0	0	0	0	0	0	0	4131250	0	0	0	0	0	0
P10163	P10163	Basic salivary proline-rich protein 4;Protein N1;Glycosylated protein A;Peptide P-D	PRB4	183.96	2978200000	22	0	0	0	0	0	0	0	0	0	0	0	0	0	6150500	0	0	0	19182000	0	0	16628500	0	0	0	0	0	0	0	0	26464500	0	11910500	0	0	0	0	0	0	0	0	0	0	0
P10253	P10253	Lysosomal alpha-glucosidase;76 kDa lysosomal alpha-glucosidase;70 kDa lysosomal alpha-glucosidase	GAA	6.6855	66899000	5	0	0	0	0	0	0	0	0	0	0	0	0	0	0	0	0	0	0	0	0	0	0	0	0	0	0	0	0	0	0	0	0	0	0	0	0	0	0	0	0	0	0	0
P10412;Q02539;P22492	P10412	Histone H1.4	HIST1H1E	18.807	699790000	38	0	0	0	0	0	0	0	0	0	2674700	0	0	0	0	0	0	0	0	0	0	0	0	0	1962200	0	0	0	0	0	0	0	3078950	0	0	5810750	0	3613150	0	0	0	0	0	0
P10599	P10599	Thioredoxin	TXN	40.165	21372000000	683	16121500	22005000	948850	48004000	16063500	7085500	0	26792500	0	7195450	0	16208500	0	19900000	29910000	0	0	0	4628800	5087000	3855550	0	11102500	38510000	0	14112850	20955500	9873650	24479500	40225500	27124500	22382500	28112500	8010450	58278500	1523850	22061000	12738850	6935000	0	0	24931800	0
P10606	P10606	Cytochrome c oxidase subunit 5B, mitochondrial	COX5B	4.1914	580590000	29	0	0	0	0	0	0	0	0	0	906150	0	0	0	0	0	0	0	0	0	0	0	0	8040500	0	0	1600250	0	0	0	0	0	0	0	0	0	0	0	0	0	0	0	0	0
P10643	P10643	Complement component C7	C7	7.9357	670550000	23	0	0	0	0	0	0	0	0	0	0	0	0	0	0	0	0	0	0	0	0	0	0	0	0	0	0	0	0	0	0	0	0	0	0	0	0	0	0	0	0	0	0	0
P10644;P31321	P10644	cAMP-dependent protein kinase type I-alpha regulatory subunit	PRKAR1A	3.7968	368340000	11	0	2029350	0	0	0	0	0	0	0	0	0	0	0	0	0	0	0	0	0	0	0	0	0	0	0	0	0	0	0	0	0	0	0	0	0	0	0	0	0	0	0	0	0
P10768	P10768	S-formylglutathione hydrolase	ESD	2.2145	7879100	1	0	0	0	0	0	0	0	0	0	0	0	0	0	0	0	0	0	0	0	0	0	0	0	0	0	0	0	0	0	0	0	0	0	0	0	0	0	0	0	0	0	0	0
P10809	P10809	60 kDa heat shock protein, mitochondrial	HSPD1	29.199	1157200000	55	0	0	0	388710	0	0	0	0	0	2007600	0	0	0	2898400	0	0	0	0	0	0	0	0	0	0	0	1059000	1292050	0	0	1390200	0	648000	398190	0	1890400	0	0	0	8504700	0	6435500	0	0
P10909	P10909	Clusterin;Clusterin beta chain;Clusterin alpha chain	CLU	323.31	18661000000	437	11087000	0	429965	12087100	5244500	1946450	0	4151750	9943500	3346650	4987800	6479500	40731000	12625000	3351650	0	13197000	0	22182000	18046150	50092500	29651500	0	4167000	0	0	5122700	3212150	88491000	14439000	947350	113862000	0	0	137958000	4341750	49300000	7781350	15823500	0	0	25204500	0
P10916;Q9BUA6	P10916;Q9BUA6	Myosin regulatory light chain 2, ventricular/cardiac muscle isoform;Myosin regulatory light chain 10	MYL2;MYL10	3.8605	0	4	0	0	0	0	0	0	0	0	0	0	0	0	0	0	0	0	0	0	0	0	0	0	0	0	0	0	0	0	0	0	0	0	0	0	0	0	0	0	0	0	0	0	0
P11021	P11021	78 kDa glucose-regulated protein	HSPA5	201.71	14175000000	691	3657550	5151700	0	12626000	9299350	6616900	13522000	7359450	0	8027600	0	8106700	0	16135000	21355500	0	0	14763000	3108200	0	5495050	1650400	21654500	11756000	0	25521000	15203500	2523800	9115800	9258500	12817500	9734700	8640400	0	11864500	0	6480950	25877500	23632000	0	36885000	4187650	0
P11142	P11142	Heat shock cognate 71 kDa protein	HSPA8	323.31	18547000000	854	24570500	5279400	0	25980000	8691000	26385000	14349500	11646800	23909000	40337500	32411500	5451500	10187500	28680000	14093500	0	0	0	4087100	27603500	9948350	9641300	17385050	26150000	0	29161500	20773000	5449700	14390000	19281500	20722500	9761350	2752050	6236050	16501350	27348000	10493900	13996600	26389500	11527500	7080350	13918000	0
P11169;Q8TDB8	P11169;Q8TDB8	Solute carrier family 2, facilitated glucose transporter member 3;Solute carrier family 2, facilitated glucose transporter member 14	SLC2A3;SLC2A14	24.25	174840000	15	0	0	300965	0	0	0	0	0	0	0	0	0	0	0	0	0	0	0	0	0	0	0	0	0	0	0	0	0	0	0	0	0	0	0	0	0	0	0	0	0	0	0	0
P11215;Q13349	P11215	Integrin alpha-M	ITGAM	323.31	23747000000	1028	0	7033100	5678250	5697550	7845150	16283000	0	2818750	0	23897500	0	4951650	0	32537500	19676500	20944500	6138500	25967500	30673500	0	0	0	19040000	0	0	65848000	775550	0	7563650	0	4505050	820450	7241750	12885550	2875550	20650000	0	23626650	19356000	77918500	53204500	1139110	37790500
P11277	P11277	Spectrin beta chain, erythrocytic	SPTB	4.2952	29197000	2	0	0	0	0	0	0	0	0	0	0	0	0	0	0	0	0	0	0	0	0	0	0	0	0	0	0	0	0	0	0	0	0	0	0	0	0	0	0	0	0	0	0	0
P11279	P11279	Lysosome-associated membrane glycoprotein 1	LAMP1	36.767	2731700000	60	0	0	0	0	0	0	0	0	0	10465550	0	9691900	0	6483000	0	4067350	0	0	0	0	0	0	0	1771450	0	2493150	0	0	0	0	0	0	0	0	2476500	0	0	0	0	0	20730000	0	0
P11310	P11310	Medium-chain specific acyl-CoA dehydrogenase, mitochondrial	ACADM	15.024	22069000	2	0	0	0	0	0	0	0	0	0	0	0	0	0	0	0	0	0	0	0	0	0	0	0	0	0	0	0	0	0	0	0	0	0	0	0	0	0	0	0	0	0	0	0
P11413	P11413	Glucose-6-phosphate 1-dehydrogenase	G6PD	34.16	5254200000	300	0	4957050	0	5575250	0	3372800	0	2362200	0	1600400	0	52544000	0	7176300	5054350	0	0	0	6807350	0	0	0	38465000	1408900	0	0	1783450	0	2660000	377145	1461700	739300	0	0	4322350	12296000	3316000	1771100	7340950	0	0	2374000	0
P11678	P11678	Eosinophil peroxidase;Eosinophil peroxidase light chain;Eosinophil peroxidase heavy chain	EPX	323.31	8999200000	624	0	8505150	0	49568500	14127000	0	0	0	0	0	0	0	104633000	0	2830700	0	0	10573150	15930000	0	0	3994950	46090500	0	0	48548500	0	0	0	0	0	0	0	6631250	0	0	9306650	0	48239500	0	15591500	0	17547500
P11684	P11684	Uteroglobin	SCGB1A1	313.46	556500000000	2293	0	19110000	72082000	196585000	456525000	0	0	169386500	640150000	505245000	9982000	0	13437050	506255000	69890000	854650000	0	197675000	0	0	430915000	0	0	257135000	0	701840000	325715000	0	476355000	411850000	148460000	1637100000	297903500	279940000	3094100000	0	2020100000	0	78660500	0	12186000	45655000	0
P60891;P11908;P21108	P60891;P11908;P21108	Ribose-phosphate pyrophosphokinase 1;Ribose-phosphate pyrophosphokinase 2;Ribose-phosphate pyrophosphokinase 3	PRPS1;PRPS2;PRPS1L1	2.3536	106170000	7	0	0	0	0	0	0	0	0	0	0	0	0	0	0	0	0	0	0	0	0	0	0	0	0	0	0	0	0	0	0	0	0	0	0	0	0	0	0	0	0	0	0	0
P11940;Q9H361;Q5JQF8;Q13310	P11940;Q9H361	Polyadenylate-binding protein 1;Polyadenylate-binding protein 3	PABPC1;PABPC3	3.8068	135980000	18	0	2395750	0	1171850	0	0	0	0	0	0	0	0	0	623850	0	0	0	0	0	0	0	0	0	0	0	0	0	0	0	0	0	0	0	0	1087655	0	636500	0	0	0	0	0	0
P12109	P12109	Collagen alpha-1(VI) chain	COL6A1	30.134	620600000	35	0	0	0	0	0	0	0	0	0	0	0	0	0	0	0	0	0	0	0	0	0	0	0	0	0	0	0	0	2084900	4882350	0	308270	0	0	0	0	0	0	2128100	0	0	1600950	0
P12110	P12110	Collagen alpha-2(VI) chain	COL6A2	5.4167	197970000	6	0	0	0	0	0	0	0	0	0	0	0	0	0	0	0	0	0	0	0	0	0	0	0	0	0	0	0	0	0	0	0	0	0	0	0	0	0	0	0	0	0	0	0
P12111	P12111	Collagen alpha-3(VI) chain	COL6A3	30.34	501950000	25	0	0	0	0	0	0	0	0	0	0	0	0	0	0	0	0	0	0	0	0	0	0	0	0	0	0	0	0	0	0	0	0	0	0	0	0	0	0	0	0	0	0	0
P12236;P12235	P12236;P12235	ADP/ATP translocase 3;ADP/ATP translocase 3, N-terminally processed;ADP/ATP translocase 1	SLC25A6;SLC25A4	5.1608	85624000	23	0	655050	0	489980	0	0	0	0	0	0	0	0	0	0	0	0	0	0	1244650	0	0	0	0	0	0	0	0	0	0	0	0	0	0	0	0	0	0	0	0	0	0	0	0
P12268	P12268	Inosine-5-monophosphate dehydrogenase 2	IMPDH2	6.9112	489020000	20	0	0	0	0	0	0	0	0	0	0	0	4442700	0	0	2349400	0	0	0	0	0	0	0	0	0	0	0	0	0	0	0	0	0	0	0	0	0	0	0	1518950	0	0	0	0
P12273	P12273	Prolactin-inducible protein	PIP	323.31	200990000000	7173	22953500	93832000	38044000	894390000	117703000	0	0	367205000	6122000	102115500	0	5212550	18170500	244995000	193692500	47702000	0	123195500	22850150	0	138171500	0	13745050	217570000	5692000	52905000	106500500	470415000	204139000	873165000	503295000	461870000	131253000	387700000	215485000	22470500	329195000	3493750	66630500	0	8609000	367730000	45214000
P12277	P12277	Creatine kinase B-type	CKB	2.7797	130940000	7	0	0	0	0	0	0	0	595365	0	0	0	0	0	0	0	0	0	0	4370400	0	0	0	2048250	0	0	0	0	0	0	0	0	0	0	0	0	3803750	0	0	0	0	0	0	0
P12429	P12429	Annexin A3	ANXA3	323.31	86004000000	3859	10903500	99124500	25285500	25695000	38958500	25723000	5188000	14245500	0	58581000	0	37746500	0	39508000	130867000	45171000	4918050	230590000	57928000	0	0	4201100	40148500	6778350	0	139390000	30528500	2677250	29471000	7399800	44043500	19894000	47478500	57680500	16308500	36665500	6492650	3719000	62644000	23351000	48233500	0	24607000
P12532	P12532	Creatine kinase U-type, mitochondrial	CKMT1A	9.0598	1401100000	28	0	0	0	2815550	0	0	0	1100250	0	0	0	8257000	0	0	0	0	0	0	15224000	0	0	0	0	4522150	0	0	2759100	0	0	0	0	0	0	0	3496000	33092000	3427000	0	10234850	0	0	3368600	0
P12724	P12724	Eosinophil cationic protein	RNASE3	300.83	29582000000	680	0	17130150	0	70195500	24279000	0	0	12026000	0	7912500	0	3910200	0	6639950	32631500	21932500	0	11145500	10746000	0	6794350	43059500	113460000	11709500	0	53086500	25601500	0	22717500	7912050	21265500	10602500	19212000	23920500	6541900	0	10364650	6247500	29394500	0	9302000	7579200	0
P12814	P12814	Alpha-actinin-1	ACTN1	323.31	33611000000	1357	0	47604000	7982950	5242500	12978450	22605500	4349600	9917250	0	25104500	0	42657000	0	47636000	76828500	43551000	8959700	13776500	44052000	0	730100	0	55270300	3858050	0	57880500	5331300	0	9344200	4882600	8844100	1257350	10643900	12343500	9051150	176835000	3017300	25828000	18164050	17926500	43122000	5519500	25346500
P12829;P05976	P12829;P05976	Myosin light chain 4;Myosin light chain 1/3, skeletal muscle isoform	MYL4;MYL1	6.8036	128380000	2	0	0	0	0	0	0	0	0	0	0	0	0	0	0	0	0	0	0	0	0	0	0	0	0	0	0	0	0	0	0	0	0	0	0	0	0	0	0	0	0	0	0	0
P12830	P12830	Cadherin-1;E-Cad/CTF1;E-Cad/CTF2;E-Cad/CTF3	CDH1	7.255	106380000	8	0	0	0	0	0	0	0	0	0	0	0	0	0	0	0	0	0	0	0	0	0	0	0	0	0	0	0	0	0	0	0	0	0	0	0	0	0	0	0	0	0	0	0
P12838	P12838	Neutrophil defensin 4	DEFA4	13.188	0	0	0	0	0	0	0	0	0	0	0	0	0	0	0	0	0	0	0	0	0	0	0	0	0	0	0	0	0	0	0	0	0	0	0	0	0	0	0	0	0	0	0	0	0
P12882	P12882	Myosin-1	MYH1	9.6126	12059000	4	0	0	0	0	0	0	0	0	0	0	0	0	0	0	0	0	0	0	0	0	0	0	0	0	0	0	0	0	0	0	0	0	0	0	0	0	0	0	0	0	0	0	0
P12883	P12883	Myosin-7	MYH7	26.289	487630000	23	0	0	0	0	0	0	0	0	0	0	0	0	0	0	0	0	0	0	0	0	0	0	0	0	0	0	0	0	0	0	0	0	0	0	0	0	0	0	0	0	0	0	0
P12955	P12955	Xaa-Pro dipeptidase	PEPD	10.493	75366000	11	0	0	0	0	0	0	0	0	0	0	0	0	0	603650	0	0	0	0	0	0	0	0	0	0	0	0	0	0	0	0	0	0	0	0	0	3728900	0	0	0	0	0	0	0
P12956	P12956	X-ray repair cross-complementing protein 6	XRCC6	4.6055	18460000	2	0	0	0	0	0	0	0	0	0	0	0	0	0	0	629050	0	0	0	0	0	0	0	0	0	0	0	0	0	0	0	0	0	0	0	0	0	0	0	0	0	0	0	0
P13073	P13073	Cytochrome c oxidase subunit 4 isoform 1, mitochondrial	COX4I1	5.0236	263630000	25	0	0	0	0	0	0	0	0	0	0	0	0	0	0	0	0	0	0	0	0	0	0	0	0	0	0	0	0	0	0	0	0	0	0	3623750	0	0	0	0	0	0	0	0
P13164;Q01629;Q01628	P13164;Q01629;Q01628	Interferon-induced transmembrane protein 1;Interferon-induced transmembrane protein 2;Interferon-induced transmembrane protein 3	IFITM1;IFITM2;IFITM3	32.495	19917000	1	0	0	0	0	0	0	0	0	0	0	0	0	0	0	0	0	0	0	0	0	0	0	0	0	0	0	0	0	0	0	0	0	0	1310350	0	0	0	0	0	0	0	0	0
P13284	P13284	Gamma-interferon-inducible lysosomal thiol reductase	IFI30	102.41	198800000	23	0	0	0	0	0	0	0	0	0	0	0	0	0	0	0	0	0	0	0	0	0	0	0	0	0	0	0	0	767835	0	0	947945	0	830350	0	0	0	0	0	0	0	0	0
P13473	P13473	Lysosome-associated membrane glycoprotein 2	LAMP2	10.225	1789200000	34	0	0	0	0	0	0	0	0	0	0	0	0	0	7336350	3509800	0	0	0	6919500	0	0	0	3444200	0	0	0	0	0	0	0	0	0	0	3635750	0	9100000	0	0	0	0	0	5199650	0
P13489	P13489	Ribonuclease inhibitor	RNH1	41.386	355820000	23	0	0	0	0	0	0	0	0	0	969160	0	0	0	0	0	0	0	0	0	0	0	0	2116950	2035600	0	0	1049800	0	0	0	0	0	0	0	0	0	0	0	0	0	0	0	0
P13498	P13498	Cytochrome b-245 light chain	CYBA	15.515	4056200000	163	0	8932450	0	3644200	3509300	0	0	1185400	0	17450000	0	7058500	0	9217500	0	0	0	5547500	0	0	0	0	0	0	0	6713100	1340200	0	0	0	0	2744200	3997600	2502650	3836400	0	2283050	0	0	0	7426000	0	0
P13639	P13639	Elongation factor 2	EEF2	112.89	6320900000	342	37429500	7434300	0	5495650	0	7920000	9009500	8724300	0	23343500	0	8879550	14793000	9643950	970700	0	0	0	20881000	0	0	75148500	21321000	31242000	0	2150100	8372150	0	955850	6836550	7352550	5587500	0	0	20635000	31296500	9248900	2614950	13201500	0	0	7092350	26490000
P13667	P13667	Protein disulfide-isomerase A4	PDIA4	4.6498	167810000	15	0	0	0	0	0	0	0	0	0	0	0	0	0	0	0	0	0	0	0	0	0	0	4084650	0	0	0	0	0	0	0	0	0	0	0	924900	0	0	0	0	0	0	0	0
P13671	P13671	Complement component C6	C6	20.552	168200000	19	0	0	0	0	0	0	0	0	0	0	0	0	0	1353250	0	0	0	0	0	0	0	0	0	0	0	0	0	0	0	0	0	0	0	0	694295	0	0	0	0	0	0	0	0
P13688	P13688	Carcinoembryonic antigen-related cell adhesion molecule 1	CEACAM1	30.174	1748000000	51	0	1966150	0	0	0	0	0	0	0	0	0	0	0	0	2432500	0	0	0	0	0	0	0	0	0	0	325915	4448850	0	0	0	0	0	0	586250	0	10155500	0	0	2617600	0	0	0	0
Q56UQ5;P13693	Q56UQ5;P13693	TPT1-like protein;Translationally-controlled tumor protein	TPT1	2.8665	471770000	10	0	0	0	0	0	0	0	0	0	0	0	0	0	0	0	0	0	0	0	0	0	0	0	3495400	0	0	0	0	0	0	0	0	0	0	4261650	0	0	0	0	0	0	0	0
P13716	P13716	Delta-aminolevulinic acid dehydratase	ALAD	3.5665	124920000	9	0	0	0	0	0	0	0	0	0	0	0	0	0	0	0	0	0	0	0	0	0	0	0	0	0	0	0	0	0	0	0	0	0	0	0	0	0	0	0	0	0	0	0
P13727	P13727	Bone marrow proteoglycan;Eosinophil granule major basic protein	PRG2	323.31	8448700000	362	0	28405500	0	57195500	16821000	0	0	0	0	0	0	0	53290000	0	0	0	0	0	2770950	0	0	5365500	4183045	0	0	100949000	0	0	0	0	0	0	0	5884100	1933350	0	20298500	0	4212750	0	0	0	9957500
P13760	P13760	HLA class II histocompatibility antigen, DRB1-4 beta chain	HLA-DRB1	4.0955	13497000	4	0	0	0	0	0	0	0	0	0	0	0	0	0	0	0	0	0	0	0	0	0	0	0	0	0	0	0	0	0	0	0	0	0	0	0	0	0	0	0	0	0	0	0
P13796	P13796	Plastin-2	LCP1	323.31	94319000000	2360	0	98889500	77406450	58832000	25700500	3344550	0	22327500	0	45182000	0	28659500	6987000	82438500	203240000	0	8303500	64854000	8696000	0	42369000	4694750	18528000	22954500	0	193070000	71730500	7089350	88704500	45716000	39882500	64826500	46410500	48186500	25806000	25752500	48469000	14642550	105875000	8690500	91980500	64589000	0
P13797	P13797	Plastin-3	PLS3	28.179	469810000	49	0	0	0	0	0	0	0	0	0	1993300	0	0	0	0	0	0	0	0	0	0	0	7864000	0	1275650	0	0	0	0	0	0	0	0	0	0	3233450	0	0	0	0	0	0	0	0
P13798	P13798	Acylamino-acid-releasing enzyme	APEH	3.6654	47338000	9	0	0	0	0	0	0	0	0	0	851730	0	0	0	0	0	0	0	0	0	0	0	0	0	0	0	0	0	0	0	0	0	0	0	0	0	0	0	0	0	0	0	0	0
P13807	P13807	Glycogen [starch] synthase, muscle	GYS1	8.3258	52646000	8	0	0	2259450	0	0	0	0	0	0	0	0	0	0	0	0	0	0	0	0	0	0	0	0	0	0	0	0	0	0	0	0	0	0	0	0	0	0	0	0	0	0	0	0
P13928	P13928	Annexin A8	ANXA8	27.215	386570000	25	0	0	0	0	0	2012750	0	0	0	0	0	2842650	0	530850	0	0	0	0	9282900	0	0	0	0	0	0	0	0	0	0	0	0	0	0	0	0	0	0	0	0	0	0	0	0
P13987	P13987	CD59 glycoprotein	CD59	71.925	17858000000	166	0	4511500	0	0	0	0	0	0	64180000	0	0	24796500	0	0	0	0	0	35936000	60796000	661345000	0	0	52990000	0	0	12324000	0	0	1875800	0	0	13060500	0	0	6588500	110825000	0	63148000	80830000	647400000	84729000	0	923740000
P14174	P14174	Macrophage migration inhibitory factor	MIF	4.3381	3738200000	254	0	7078500	0	12501500	0	0	0	0	0	0	0	0	0	6062050	0	0	0	0	32118500	0	0	0	15896000	4689300	0	2216500	0	0	0	4644300	0	1943700	0	3123700	5379000	34378500	0	0	23032000	0	0	0	0
P14314	P14314	Glucosidase 2 subunit beta	PRKCSH	11.307	333770000	29	0	0	0	0	0	0	3829200	0	0	591750	0	0	0	0	0	0	0	0	0	0	0	0	0	0	0	0	0	0	0	0	0	1768800	0	0	535650	2040800	0	0	0	0	0	0	0
P14406	P14406	Cytochrome c oxidase subunit 7A2, mitochondrial	COX7A2	3.9178	795840000	82	0	1061000	0	2074400	0	0	0	1432400	0	0	0	0	0	1273300	2284450	0	0	1147250	0	0	0	0	0	626250	0	466750	1290600	0	891000	1206250	2922200	340160	0	0	753620	7024950	0	0	1649200	0	0	0	0
P14550	P14550	Alcohol dehydrogenase [NADP(+)]	AKR1A1	15.426	713820000	40	0	0	0	0	0	4334950	0	0	0	1304600	0	1242150	0	606450	0	0	0	0	0	0	0	0	4474800	0	0	0	0	0	1247950	0	0	0	0	0	2988950	12313500	0	0	0	0	0	4786100	0
P14555	P14555	Phospholipase A2, membrane associated	PLA2G2A	49.459	2158100000	68	0	4105950	0	0	15612450	14069500	0	0	0	5358400	0	0	0	12081500	6238200	0	0	0	0	0	0	0	0	0	0	0	0	0	0	0	0	0	0	0	5849600	0	0	0	3137400	0	0	16919000	13177000
P14598;A6NI72;A8MVU1	P14598;A6NI72;A8MVU1	Neutrophil cytosol factor 1;Putative neutrophil cytosol factor 1B;Putative neutrophil cytosol factor 1C	NCF1;NCF1B;NCF1C	31.993	852290000	50	0	0	0	0	0	0	0	0	0	0	0	6651500	0	0	0	0	0	0	0	0	0	0	7870350	0	0	0	0	0	0	0	0	0	0	0	0	0	0	3459000	0	0	0	0	0
P14618;P30613	P14618	Pyruvate kinase PKM	PKM	168.29	10916000000	641	24464000	7605650	2020800	13029100	6579500	12184500	0	1529800	14877000	9677100	5392500	21105000	47435000	8583400	2579000	0	15802500	0	0	4475250	1554100	0	67208000	10999350	0	7874850	10097600	1020950	8918750	8410050	6748500	8706550	0	0	11916850	19556500	2418300	7327000	17319500	0	17688000	4674650	4902400
P14625;Q58FF3	P14625	Endoplasmin	HSP90B1	24.679	2596000000	179	0	0	0	4177100	2365200	3715750	0	0	0	1180840	0	0	0	8636400	1416400	0	0	4960400	0	0	0	0	9420000	4465000	0	4386850	0	0	3995600	2852850	2251950	5947950	0	0	0	7991000	0	7727000	0	0	5158500	0	0
P14780	P14780	Matrix metalloproteinase-9;67 kDa matrix metalloproteinase-9;82 kDa matrix metalloproteinase-9	MMP9	323.31	47924000000	1714	0	14659500	70561500	13234000	20896500	0	5073500	2401100	0	27732000	0	55983000	0	71028500	99104500	86572500	0	55751000	27868000	0	2865600	0	6441000	6630700	0	192035000	10018000	0	7028950	6710800	11842200	2655800	17933000	100683000	7921100	5093000	6025050	19094000	19171500	7366650	17411000	5303700	54631000
P14854	P14854	Cytochrome c oxidase subunit 6B1	COX6B1	2.3746	33518000	4	0	0	0	643300	0	0	0	0	0	0	0	0	0	0	0	0	0	0	0	0	0	0	0	0	0	0	0	0	0	0	0	0	0	0	749425	0	0	0	0	0	0	0	0
P14866	P14866	Heterogeneous nuclear ribonucleoprotein L	HNRNPL	3.0124	40516000	5	0	0	0	0	0	0	0	0	0	0	0	0	0	0	0	0	0	0	0	0	0	0	0	0	0	0	0	0	0	0	0	0	0	0	0	0	0	0	0	0	0	0	0
P14868	P14868	Aspartate--tRNA ligase, cytoplasmic	DARS	6.1468	78316000	6	0	0	0	0	0	0	0	0	0	0	0	0	0	0	0	0	0	0	0	0	0	0	1825700	0	0	0	0	0	0	0	0	0	0	0	503470	0	0	0	0	0	0	0	0
P14923	P14923	Junction plakoglobin	JUP	323.31	13396000000	574	19132500	36689000	0	14192850	0	11000000	6729500	16835450	0	95448000	0	28758500	0	17907500	2135500	0	12112000	0	0	7698000	0	30561000	29652000	114320000	0	5609000	15030900	6057500	1316300	25079000	25525000	0	5018000	0	91869000	15494500	11351500	4434850	3444250	0	0	9077450	1661450
P15090;P02689	P15090;P02689	Fatty acid-binding protein, adipocyte;Myelin P2 protein	FABP4;PMP2	5.4477	342120000	29	0	0	0	0	0	6211500	0	0	0	0	0	0	0	0	0	0	0	0	0	0	0	0	0	0	0	0	0	0	4609450	865950	0	3750000	0	0	0	0	0	0	0	0	0	2810100	0
P15104	P15104	Glutamine synthetase	GLUL	10.788	13615000000	101	0	14054150	0	21529000	0	0	16157000	18272500	0	42751500	0	0	0	13000500	0	0	0	0	0	0	0	0	0	58127000	0	7343000	0	0	0	20698500	11595500	0	23459500	0	25081000	51129500	5271500	0	13470000	0	0	0	0
P15144	P15144	Aminopeptidase N	ANPEP	41.752	2214600000	134	0	2050350	0	0	0	0	0	0	0	618350	0	0	0	3617400	2181200	0	0	0	9903400	0	0	0	0	0	0	2866900	0	0	0	0	0	2541400	0	0	780400	0	1274600	11642000	4715150	0	0	0	0
P15153	P15153	Ras-related C3 botulinum toxin substrate 2	RAC2	86.233	17303000000	439	0	7400900	13069000	15464500	19900000	3995250	0	0	24068500	28794500	0	20470000	25122500	18631200	10603000	13730500	0	12409800	0	40718500	0	0	34292500	6975200	0	14374500	6209500	0	2944650	3399700	5791250	3145650	3199050	0	7917950	0	7123500	0	40040500	0	0	5218800	9940650
P15291	P15291	Beta-1,4-galactosyltransferase 1;Lactose synthase A protein;N-acetyllactosamine synthase; Processed beta-1,4-galactosyltransferase 1	B4GALT1	28.625	52089000	4	0	0	0	0	0	0	0	0	0	0	0	0	0	0	0	0	0	0	1155400	0	0	0	1526050	0	0	0	0	0	0	0	0	0	0	0	0	0	0	0	0	0	0	0	0
P15311	P15311	Ezrin	EZR	132.03	4133500000	182	0	0	0	2453100	0	399500	5148500	2836750	0	405945	10832850	0	0	8097850	0	0	11703000	0	0	0	3059350	0	8224500	4521150	0	2930500	3267650	0	0	6621450	2267950	20284500	0	4463550	35221500	0	9371900	0	4274500	33403500	6272000	5592100	0
P15328	P15328	Folate receptor alpha	FOLR1	67.425	415850000	19	0	0	0	0	0	4133000	0	0	0	0	0	0	0	2927750	0	0	0	0	0	0	0	0	0	0	0	0	0	0	0	0	0	0	0	0	0	0	0	0	0	0	0	7923000	0
P15515	P15515	Histatin-1;His1-(31-57)-peptide	HTN1	8.706	0	0	0	0	0	0	0	0	0	0	0	0	0	0	0	0	0	0	0	0	0	0	0	0	0	0	0	0	0	0	0	0	0	0	0	0	0	0	0	0	0	0	0	0	0
P15586	P15586	N-acetylglucosamine-6-sulfatase	GNS	7.0529	718990000	17	0	0	0	0	0	0	0	0	0	0	0	0	0	0	0	0	0	0	0	0	0	0	0	0	0	3624350	0	0	0	0	0	0	0	0	0	0	0	0	0	0	0	0	0
P15814	P15814	Immunoglobulin lambda-like polypeptide 1	IGLL1	116.93	95717000	4	0	0	0	0	0	0	0	0	0	0	0	0	0	0	0	0	0	0	0	0	0	0	0	0	0	0	0	0	0	0	0	0	0	0	0	0	0	0	0	0	13062500	0	0
P15880	P15880	40S ribosomal protein S2	RPS2	9.0633	684920000	37	0	0	0	643650	0	0	0	0	0	4541200	0	0	0	0	0	0	0	0	0	0	0	7013000	0	6764350	0	0	0	0	0	0	2081650	0	0	0	5665250	3047600	0	0	0	0	0	0	0
P15907	P15907	Beta-galactoside alpha-2,6-sialyltransferase 1	ST6GAL1	2.513	0	1	0	0	0	0	0	0	0	0	0	0	0	0	0	0	0	0	0	0	0	0	0	0	0	0	0	0	0	0	0	0	0	0	0	0	0	0	0	0	0	0	0	0	0
P15924	P15924	Desmoplakin	DSP	323.31	26154000000	842	36482400	25550500	0	6545450	1526550	18179750	0	63160500	0	151151500	0	19723000	0	8717700	67292000	0	3822650	0	1989350	8135000	0	16728500	31660500	243030000	0	5138500	20698000	10392500	7745550	49749000	113633500	0	1554750	0	127400000	52305000	9184050	2095450	1099450	0	0	676600	26809000
P15941	P15941	Mucin-1;Mucin-1 subunit alpha;Mucin-1 subunit beta	MUC1	36.898	4383200000	232	0	3164500	0	1823500	4403200	0	0	1110050	0	0	2762450	0	0	14970500	1995900	0	5897000	0	10983200	0	0	0	0	0	0	1233300	2027950	0	2406400	6659700	3207650	4156300	0	6783850	5067350	0	4794750	12595200	19199500	17364500	0	0	0
P16050	P16050	Arachidonate 15-lipoxygenase	ALOX15	14.637	468440000	13	0	0	0	0	0	0	0	0	0	0	0	0	0	0	0	0	0	0	0	0	0	0	33478000	0	0	0	0	0	0	0	0	0	0	0	0	0	0	0	0	0	0	0	0
P16070	P16070	CD44 antigen	CD44	3.0747	43502000	2	0	0	0	0	0	0	0	0	0	0	0	1842250	0	673300	0	0	0	0	0	0	0	0	0	0	0	0	0	0	0	0	0	0	0	0	0	0	0	0	0	0	0	0	0
P16152	P16152	Carbonyl reductase [NADPH] 1	CBR1	12.806	292560000	31	0	0	0	0	0	0	0	681350	0	1732550	0	0	0	0	0	0	0	0	0	0	0	2619900	0	4997350	0	0	0	0	0	0	0	0	0	0	2177200	0	1871000	0	0	0	0	0	0
P16157	P16157	Ankyrin-1	ANK1	22.225	83397000	7	0	0	0	0	0	0	0	0	0	0	0	0	0	0	0	0	0	0	0	0	0	0	0	0	0	0	0	0	0	0	0	0	0	0	0	0	0	0	0	0	0	0	0
P16219	P16219	Short-chain specific acyl-CoA dehydrogenase, mitochondrial	ACADS	4.2926	8220900	1	0	0	0	0	0	0	0	0	0	0	0	0	0	0	0	0	0	0	0	0	0	0	0	0	0	0	0	0	0	0	0	0	0	0	0	0	0	0	0	0	0	0	0
P16401	P16401	Histone H1.5	HIST1H1B	10.119	870350000	26	0	0	0	0	4240300	0	0	0	0	0	0	0	0	0	0	0	0	0	0	0	0	0	0	0	0	0	0	5176700	2333050	0	0	0	0	0	0	0	0	0	0	0	0	0	0
P16402	P16402	Histone H1.3	HIST1H1D	3.0127	54767000	13	0	0	0	0	0	0	0	0	0	0	0	0	0	0	0	0	0	0	0	0	0	0	0	0	0	0	0	0	0	0	0	0	0	0	0	0	0	0	0	0	0	0	0
P16403	P16403	Histone H1.2	HIST1H1C	4.3973	347340000	20	0	0	0	573900	1582200	0	0	0	0	0	0	0	0	0	0	0	0	0	0	0	1540800	0	0	0	0	0	0	0	0	0	0	0	0	0	0	0	0	0	0	0	0	0	0
P16452	P16452	Erythrocyte membrane protein band 4.2	EPB42	5.8101	28745000	1	0	0	0	0	0	0	0	0	0	0	0	0	0	0	0	0	0	0	0	0	0	0	0	0	0	0	0	0	0	0	0	0	0	0	0	0	0	0	0	0	0	0	0
P16615	P16615	Sarcoplasmic/endoplasmic reticulum calcium ATPase 2	ATP2A2	5.6129	102360000	8	0	0	0	0	0	0	0	0	0	0	0	0	0	0	0	0	0	0	0	0	0	0	2243500	0	0	0	0	0	0	0	0	0	0	0	0	0	0	0	0	0	0	0	0
P16870	P16870	Carboxypeptidase E	CPE	25.999	989480000	58	0	0	0	7220350	0	0	15469500	0	0	776250	0	8165500	0	7081550	0	0	0	0	0	0	0	0	0	0	0	0	0	0	0	0	0	3437700	0	0	871200	0	1137800	0	7969200	0	0	11240500	1791900
P16930	P16930	Fumarylacetoacetase	FAH	4.7453	150730000	10	0	0	0	0	0	0	0	0	0	0	0	0	0	0	0	0	0	0	0	0	0	0	0	0	0	0	0	0	0	0	0	0	0	0	0	0	0	0	0	0	0	0	0
P17066;P48741	P17066	Heat shock 70 kDa protein 6	HSPA6	26.106	3411000000	120	0	1545550	0	4756150	5618500	2706100	0	3376750	0	3339150	0	0	0	2058150	10235400	0	0	6619100	0	0	0	0	0	7071300	0	11559500	3335050	5408500	6978200	7602050	12725000	4990200	2496000	0	1272500	0	2364500	0	0	0	0	1164350	0
P17174	P17174	Aspartate aminotransferase, cytoplasmic	GOT1	13.136	655470000	17	0	0	0	0	0	0	0	0	0	0	0	0	0	0	0	0	0	0	0	0	0	0	0	0	0	1763550	0	0	0	0	0	0	0	0	652050	0	0	0	5920750	0	0	0	0
P17213	P17213	Bactericidal permeability-increasing protein	BPI	197.27	24203000000	925	0	6883350	13902000	11341700	10710550	0	0	5954750	0	28181500	0	6166500	0	5102000	13446000	85323000	0	0	0	0	0	0	0	0	0	103098500	18468500	0	3420600	3441400	0	2668400	29856500	14063500	3710450	10051000	4044400	0	3362300	0	4901050	0	33214500
P17655	P17655	Calpain-2 catalytic subunit	CAPN2	6.8501	137200000	8	0	0	0	0	0	0	0	0	0	0	0	0	0	0	0	0	0	0	0	0	0	0	0	0	0	0	0	0	0	0	0	0	0	0	0	0	0	0	1694800	0	0	0	0
P17661	P17661	Desmin	DES	7.9105	46649000	5	0	0	0	0	0	0	0	0	0	3411400	0	0	0	0	0	0	0	0	0	0	0	0	0	0	0	0	0	0	0	0	0	0	0	0	0	0	0	0	0	0	0	0	0
P17858	P17858	ATP-dependent 6-phosphofructokinase, liver type	PFKL	3.6532	27698000	7	0	0	0	0	0	0	0	0	0	0	0	0	0	0	0	0	0	0	0	0	0	0	0	0	0	0	0	0	0	0	0	0	0	0	0	0	0	0	0	0	0	0	0
P17900	P17900	Ganglioside GM2 activator;Ganglioside GM2 activator isoform short	GM2A	3.411	283140000	34	0	0	0	0	0	0	0	1109800	0	0	0	0	0	0	707465	0	0	0	2911850	0	0	0	0	0	0	0	0	0	0	0	0	0	0	0	0	0	0	0	0	0	0	1119065	0
P17927;Q2VPA4	P17927	Complement receptor type 1	CR1	4.3387	286440000	28	0	0	0	0	0	0	0	0	0	0	0	0	0	0	0	0	0	0	0	0	0	0	0	0	0	0	0	0	0	0	0	0	0	0	0	0	0	0	0	0	0	0	0
P17931	P17931	Galectin-3	LGALS3	23.178	6693500000	282	0	8468500	0	2485000	0	0	0	0	0	3104550	0	3055100	0	11448250	0	0	0	0	16184000	0	0	0	18621500	2779150	0	3692850	3911900	0	0	3799150	0	7629250	1547600	6972550	20435500	0	4685650	0	6019000	9544000	0	2739950	6859000
P18065	P18065	Insulin-like growth factor-binding protein 2	IGFBP2	19.305	102390000	52	0	0	0	0	0	0	0	0	0	0	0	0	0	0	0	0	0	0	0	0	0	0	0	0	0	0	0	0	0	0	0	0	0	0	0	0	0	0	0	0	0	0	0
P18085	P18085	ADP-ribosylation factor 4	ARF4	3.0159	548890000	24	0	0	0	0	0	0	0	0	0	3213550	0	0	0	1570700	0	0	0	0	0	0	0	7334500	0	1608550	0	0	0	0	0	0	0	0	0	0	0	0	0	0	1872050	0	0	0	0
P18124	P18124	60S ribosomal protein L7	RPL7	7.3562	551750000	60	9675950	1008000	0	3711050	0	0	0	2439700	0	1685850	0	0	0	0	0	0	0	0	0	0	0	6721000	0	3685850	0	0	2479750	0	0	402500	1089500	0	0	0	1453700	6407300	0	0	0	0	0	0	13373500
P18135;P18136	P18135;P18136	Ig kappa chain V-III region HAH;Ig kappa chain V-III region HIC		230.64	53417000000	3447	12549200	37992500	33997000	35527000	26841500	0	21987200	25974000	0	16499500	11774500	0	0	20856000	26370000	23364500	15078500	19869500	511700	0	49862000	8382500	6864500	17430000	9143000	15397000	45337000	0	25763000	19569500	17181100	42458500	46447000	79362000	21329000	12590500	28538500	17157000	40435500	68377000	44719000	69667500	11378500
P18206	P18206	Vinculin	VCL	134.31	12980000000	391	0	4023350	845450	3615150	5888000	0	0	709850	0	8491700	0	61738000	0	9762450	6493500	5804500	0	0	23314000	0	0	0	103849500	8224200	0	22108000	3486100	0	0	0	0	0	0	5835150	971250	55648500	7357450	60433000	5225000	22196000	20443500	0	3979400
P18428	P18428	Lipopolysaccharide-binding protein	LBP	8.3531	422220000	28	0	0	0	0	0	0	0	0	0	0	0	0	0	0	0	0	0	0	0	0	0	0	0	0	0	0	0	0	0	0	0	0	0	0	0	0	0	2159650	0	0	0	0	0
P18510	P18510	Interleukin-1 receptor antagonist protein	IL1RN	94.577	1591500000	65	12223000	5370800	0	1184500	0	8326300	0	6792400	0	5225000	0	0	0	4249700	0	0	0	0	0	0	0	0	4693800	3014300	0	0	5036150	0	923250	4905900	1281000	0	0	0	4242650	0	1641050	0	0	0	0	4635450	0
P18669;Q8N0Y7;P15259	P18669	Phosphoglycerate mutase 1	PGAM1	125.69	9447000000	243	0	10972300	0	8571300	0	2226050	0	5738150	0	12885000	0	0	0	9753900	11886050	0	0	3397550	11323000	0	4007450	0	5430000	8892500	0	57195000	5421550	0	4662700	5957050	3163900	0	12524500	0	12539300	19695500	2765350	14798500	3442750	0	0	5036400	0
P19013	P19013	Keratin, type II cytoskeletal 4	KRT4	323.31	664490000000	10057	69301500	629805000	11812080	959655000	447255000	11170800	10371950	2296500000	0	3694450000	40639500	53008000	44016500	365000000	1404400000	0	45594500	52214000	20128000	50737500	261330000	43154000	79181500	1613600000	3671600	613990000	592860000	933495000	635165000	990065000	2247250000	414110000	235655000	41816000	1342550000	96459500	1454850000	62008500	186500000	15417500	45380500	1301150000	38270000
P19021	P19021	Peptidyl-glycine alpha-amidating monooxygenase;Peptidylglycine alpha-hydroxylating monooxygenase	PAM	16.686	145270000	15	0	0	0	0	0	0	0	0	0	0	0	0	0	0	0	0	0	0	0	0	0	0	0	0	0	0	0	0	0	0	0	0	0	0	0	0	378520	0	0	0	0	0	16565000
P19367;Q2TB90	P19367	Hexokinase-1	HK1	6.3108	98191000	12	0	728050	0	0	0	0	0	0	0	0	0	0	0	0	0	0	0	0	1014650	0	0	0	0	959365	0	0	0	0	0	0	0	0	0	0	0	2351400	0	0	0	0	0	0	0
P19397	P19397	Leukocyte surface antigen CD53	CD53	2.6002	661620000	13	0	0	0	0	0	0	0	0	0	0	0	0	0	0	0	0	0	0	0	0	0	0	0	0	0	1172400	0	0	0	0	0	0	0	0	0	0	0	0	0	0	5288500	0	0
P19652	P19652	Alpha-1-acid glycoprotein 2	ORM2	270.68	14097000000	452	0	0	5709250	6557350	2830350	0	0	0	0	0	0	0	0	13667500	24579000	0	0	0	0	0	2515700	0	0	1045400	0	4020750	0	0	2444000	1073500	2760600	18525000	7212000	3656400	0	5419000	5281950	0	21415500	0	0	0	0
P19827	P19827	Inter-alpha-trypsin inhibitor heavy chain H1	ITIH1	21.629	487400000	13	0	0	0	0	0	0	7505000	0	0	0	0	0	0	0	0	0	0	0	0	0	0	0	0	0	0	0	0	0	0	0	0	0	0	0	0	0	0	0	0	0	0	0	0
P19878	P19878	Neutrophil cytosol factor 2	NCF2	99.247	1009800000	41	0	0	0	0	0	0	0	0	0	0	0	0	0	0	0	0	0	3726800	0	0	0	0	0	0	0	0	0	0	0	0	0	0	0	0	0	0	0	5531000	0	0	0	0	0
P19957	P19957	Elafin	PI3	39.513	2614700000	113	0	2539350	925100	10378100	0	0	0	0	0	0	0	0	0	5338200	0	0	0	0	0	0	11165900	0	9727000	26235000	0	0	16555000	0	0	2161450	0	3840500	0	0	8505850	0	4282750	0	7664000	0	0	0	0
P19961	P19961	Alpha-amylase 2B	AMY2B	30.631	78351000	5	0	0	0	0	0	0	0	0	0	0	0	0	0	0	0	0	0	0	0	0	0	0	0	0	0	0	0	0	0	0	0	0	0	0	0	0	0	0	0	0	0	0	0
P19971	P19971	Thymidine phosphorylase	TYMP	8.6319	150470000	14	0	0	0	0	0	0	0	0	0	0	0	0	0	0	0	0	0	0	0	0	0	0	0	0	0	0	0	0	0	0	0	0	0	0	0	0	0	0	0	0	0	0	0
P20039	P20039	HLA class II histocompatibility antigen, DRB1-11 beta chain	HLA-DRB1	59.45	698230000	44	0	0	0	0	0	0	0	0	0	0	0	0	0	0	0	0	0	2663550	0	0	0	0	0	0	0	0	0	0	0	0	0	2449500	0	0	0	0	0	0	0	0	0	0	0
P20061	P20061	Transcobalamin-1	TCN1	323.31	5308900000	217	0	0	13626000	11463500	0	0	0	0	0	10286000	0	0	0	8377250	0	0	0	0	5047250	0	14295000	0	0	4135100	0	1315200	6910000	0	1432400	6964450	1402700	19918000	0	0	21919500	0	20997500	0	5867000	0	0	6726150	0
P20073	P20073	Annexin A7	ANXA7	29.334	372700000	24	0	0	0	0	0	0	0	0	0	0	0	0	0	0	0	0	0	0	0	0	0	0	0	0	0	0	0	0	0	0	0	0	0	626650	262370	0	0	0	0	0	0	0	0
P20142	P20142	Gastricsin	PGC	84.71	0	0	0	0	0	0	0	0	0	0	0	0	0	0	0	0	0	0	0	0	0	0	0	0	0	0	0	0	0	0	0	0	0	0	0	0	0	0	0	0	0	0	0	0	0
P20160	P20160	Azurocidin	AZU1	323.31	49549000000	1651	0	45992000	22131000	12918500	0	0	0	7425500	0	84021500	0	0	0	10241500	128316000	50810000	0	0	0	0	0	0	0	24798000	0	138960000	0	0	10692500	4552650	11149000	15034500	0	70350500	27927500	0	18971500	0	1854950	0	0	0	583500
P20290	P20290	Transcription factor BTF3	BTF3	2.6081	11653000	1	0	0	0	0	0	0	0	0	0	0	0	0	0	0	0	0	0	0	0	0	0	0	0	413050	0	0	0	0	0	0	0	0	0	0	0	0	0	0	0	0	0	0	0
P20292	P20292	Arachidonate 5-lipoxygenase-activating protein	ALOX5AP	7.9248	4730900000	318	0	726350	9255600	633400	4908800	0	0	1363130	0	6293050	0	0	0	1015615	3679200	37958500	0	1753650	0	0	0	0	7038500	0	0	15408000	0	0	0	0	0	750890	3208250	3066150	2608600	0	0	0	4994700	0	8810000	528250	62056000
P20340;Q9NRW1;Q14964	P20340;Q9NRW1	Ras-related protein Rab-6A;Ras-related protein Rab-6B	RAB6A;RAB6B	46.761	2538500000	203	0	6125500	0	4463850	3657900	0	8993500	3139900	0	1706100	0	4888000	0	1242400	4306200	0	0	1796450	0	0	0	18025500	15951000	3137950	0	719600	5932900	0	2992150	5174050	4448050	7190550	1669350	0	2971450	6004500	3367400	0	0	0	0	0	0
P20618	P20618	Proteasome subunit beta type-1	PSMB1	7.9577	573300000	48	0	2883550	0	773200	0	0	0	0	0	0	0	0	0	0	0	0	0	0	0	0	0	0	0	732300	0	0	0	0	0	0	0	0	0	0	0	0	0	4853150	0	0	1835000	0	0
P20674	P20674	Cytochrome c oxidase subunit 5A, mitochondrial	COX5A	7.9723	386140000	25	0	0	0	0	0	0	0	0	0	5353500	0	0	0	0	0	0	0	0	0	0	0	0	5689500	0	0	0	0	0	0	0	0	0	0	0	0	0	0	0	2201200	0	0	0	0
[truncated: 657 more rows]
[truncated: 72 more columns]

## Sheet: D. MaxQuant-432 filtered protei
D. Proteomic analysis of 75 sputum samples filtered based on data quality and integrated in a single experiment for quantiative difference analysis comparing the PTB, LTBI and NCC groups
[truncated: 433 more rows]
[truncated: 34 more columns]
