# Supplementary material for: Protein and Microbial Biomarkers in Sputum Discern Acute and Latent Tuberculosis in Investigation of Pastoral Ethiopian Cohort
Source: Front Cell Infect Microbiol. 2021 Jun 4;11:595554. doi: 10.3389/fcimb.2021.595554 (PMC8212885; doi:10.3389/fcimb.2021.595554)
Supplement: Supplementary file 2 [file DataSheet_2.xlsx]

## Sheet: A. PTB vs. LTBI
Supplementary Datasheet 2 (comparaptive abundance analyses of PTB vs LTBI and LTBI vs NCC and GO term analysis for PTB vs LTBI).
Analysis of fold changes and statistical differences of proteins using MaxQuant output for 75 samples comparing PTB vs LTBI datasets with associated GO term enriched biological processes and comparing LTBI vs NCC datasets.
A. PTB vs LTBI groups using Welch t-tests for statistical significant analysis (summed analysis starting in column BX)
AKC001	AKC003	AKC005	AKC006	AKC007	ARB042	ARB044	ARB049	ARC001	ARC003	ARC010	BES009	BES011	BES015	BES016	DM010	DM022	DM024	DM047	DM048	DM050	DM051	GUBC004	LOC021	LOC003	LOC007	LOC008	LOC011	LOC017	LOC020	MKC001	MKC009	MKC011	MKC016	NPC002	NPC003	NPC005	NPC006	NPC008	NRC008	NRC011	NRC013	SH007	SH016	SO0089	SO0093	SO0095	SO0096	SO0103	SO0104
LTBI	LTBI	Ctl	LTBI	LTBI	LTBI	LTBI	Ctl	Ctl	Ctl	LTBI	LTBI	Ctl	Ctl	LTBI	Ctl	LTBI	LTBI	LTBI	LTBI	Ctl	LTBI	Ctl	Ctl	Ctl	LTBI	LTBI	LTBI	Ctl	Ctl	Ctl	Ctl	Ctl	Ctl	LTBI	LTBI	LTBI	LTBI	LTBI	Ctl	LTBI	LTBI	LTBI	Ctl	PTB	PTB	PTB	PTB	PTB	PTB
21.1455	18.7506	23.3976	24.3675	21.2575	21.044	21.2902	25.2347	21.8395	24.3637	23.0064	24.5522	23.3727	21.1091	19.0842	23.8355	18.8786	21.8341	21.6465	23.6521	23.5546	24.0547	21.4261	22.6343	20.5045	22.6146	20.3918	24.0077	22.4605	19.8781	23.6102	23.6389	22.2917	20.9909	22.4556	22.1318	23.9621	22.0218	23.592	23.7244	23.0953	23.0851	21.3636	19.94	26.5704	26.7603	25.9618	27.3608	21.1395	27.6493
22.8666	20.7008	22.3237	19.5812	23.9729	19.475	22.6063	24.8963	23.2204	21.3949	22.9245	24.6553	19.955	24.4835	18.9821	25.8479	19.8292	20.6006	20.5192	18.0537	20.1366	21.7966	24.3029	20.4748	21.909	20.2274	24.1602	20.7845	24.4159	19.7496	24.0259	23.1985	24.7203	20.5289	20.4306	20.328	20.0461	22.8971	24.4238	24.1548	19.8799	25.9628	21.9337	21.5158	23.8845	23.0588	21.2711	24.4018	24.6846	22.501
19.3373	17.0931	18.2493	18.4334	20.1414	17.4647	18.3845	21.008	20.5594	18.7695	18.3813	19.8437	19.6867	22.9314	19.0186	21.4022	19.2356	18.9002	18.387	19.1383	21.9299	19.1525	17.7972	18.3256	21.1638	19.6269	20.585	21.0443	21.4932	19.0376	19.0413	20.4557	18.5899	21.2391	20.5947	20.2949	20.4928	17.8695	22.1254	19.9253	18.6244	20.612	21.0493	19.9175	22.188	23.4662	20.7931	20.4186	23.9925	24.3529
23.9114	18.9434	20.9476	21.1041	23.1928	21.667	24.1408	24.9536	23.7935	24.7324	24.5964	21.1406	18.9096	26.5448	19.0302	23.9942	19.5914	21.3015	18.9855	20.7924	23.0519	20.8822	23.9322	22.1988	21.0155	20.3725	23.2747	22.75	25.0861	18.7327	24.0232	25.3555	25.4705	21.7381	22.4882	22.2823	24.2349	24.4191	24.5386	24.3149	20.2333	25.6397	23.5889	22.5484	23.714	25.4555	25.0378	24.5995	25.3825	23.8182
18.6901	22.4449	22.6447	21.4325	20.9928	19.3892	18.0037	20.5358	23.7042	24.5509	19.821	19.9963	21.2625	20.4589	19.9956	21.939	19.5958	21.2208	20.0339	21.3966	24.143	22.782	21.802	18.4668	22.3696	22.3326	20.9003	24.3522	21.5871	19.1147	18.3164	19.9285	19.4979	20.0271	20.8972	21.0637	20.5707	21.6036	22.0767	21.5407	22.8234	20.9753	23.0101	20.1008	24.3602	23.5807	24.6056	21.1107	21.3509	24.6069
20.8275	19.2992	22.037	21.2175	20.5183	19.5237	22.509	22.8655	23.2389	24.1361	23.1784	24.0155	20.201	23.135	20.1472	24.3682	22.2551	20.5214	19.7507	19.9459	21.6941	22.9463	21.5004	20.2751	20.077	17.5007	21.3691	21.0673	25.0193	18.2357	23.4178	23.385	24.673	20.7075	20.0909	19.2806	20.7568	21.557	23.2872	23.9781	20.2659	24.8098	21.2994	20.7577	24.21	22.0427	19.9304	24.6791	23.295	21.9974
22.3735	17.7373	21.5567	21.4459	20.1195	18.6049	17.3816	20.1393	21.6304	19.1634	18.7342	23.6617	18.0905	20.5409	21.7032	24.3867	22.2888	20.0426	21.9997	18.9145	23.193	18.4894	21.8646	20.9128	20.9578	21.2908	20.8414	23.9588	24.0265	19.1497	22.9471	21.5453	23.6278	21.6921	20.2811	18.3334	21.5295	17.6782	24.1033	20.0895	19.7619	18.7216	21.1475	20.2887	24.947	21.6749	20.2728	20.5112	23.4777	24.2375
22.4821	17.1438	21.655	21.1048	23.3177	18.164	22.9751	24.9742	24.9057	23.797	19.3659	25.4744	24.3528	25.298	18.4121	22.6276	19.6407	22.6544	21.5707	20.2996	26.6373	22.2927	23.3824	22.7229	21.6288	21.553	24.7087	24.6737	20.7411	22.7233	24.8348	24.7311	24.9403	23.8524	23.6718	22.6456	25.8279	23.879	26.7859	24.774	25.6918	25.2815	25.5349	24.6899	26.0555	25.4199	23.5028	25.0365	27.3237	27.6293
26.4469	25.7646	26.4244	25.7984	24.6046	26.1594	27.2238	25.9142	26.0687	27.7657	23.3704	23.1021	20.223	22.9099	24.6199	27.0978	24.333	23.6204	19.988	26.5164	24.3195	26.3801	26.4989	27.4415	20.9703	27.1079	24.0417	24.6967	23.7588	22.7997	27.5312	26.7925	26.8659	25.8161	26.7183	20.9929	26.7712	26.6104	28.048	19.6021	25.9976	26.6413	27.144	26.2242	28.9012	28.0298	28.9085	25.383	22.9566	30.8697
20.8377	17.0347	18.3229	22.3164	23.5224	20.0316	22.255	22.822	22.1697	23.0756	23.0882	23.5072	19.8485	22.1007	20.4248	24.1766	19.9826	19.4505	18.5304	20.1701	18.8901	22.7147	23.1322	19.576	21.6286	20.0683	21.8116	23.1166	23.7424	19.2314	23.0685	21.442	22.9108	21.1499	21.4549	17.8502	20.4437	19.4022	22.6526	22.391	22.4373	23.8916	21.8477	21.7943	24.3097	22.534	23.0162	19.7309	22.5623	22.8031
19.654	21.5918	23.1435	20.6731	20.3231	17.909	24.2433	21.451	22.4659	19.3956	24.9371	24.758	18.6794	21.338	19.3495	25.6216	21.4075	21.2664	20.0162	20.2372	20.4819	23.6552	23.9576	22.2051	23.2724	17.91	20.9462	23.6778	24.7439	18.5244	22.4966	23.6897	25.4457	21.2778	19.3657	19.9762	20.3466	23.4201	25.0385	20.7267	19.7554	24.8607	24.1339	23.2841	23.6744	24.7336	21.8554	22.5558	22.8085	22.6794
19.6818	18.3182	17.851	19.2178	21.4965	17.9839	17.7522	20.8151	19.2046	19.8965	19.5616	20.1434	19.2237	21.655	18.2904	19.0048	19.304	17.7932	18.2996	18.6005	19.071	18.8671	19.249	18.1471	23.5964	17.6471	20.5136	20.5704	22.2557	19.5662	19.2014	20.1219	17.7523	21.4672	18.9349	20.5887	20.4282	18.2087	18.7042	20.0043	20.0718	20.3683	20.9158	19.929	19.4699	19.6686	22.7743	20.7757	23.9505	19.2307
23.0371	18.1853	22.4208	23.0987	20.4724	19.8255	24.198	20.477	24.4131	22.3516	24.6427	23.8219	20.8216	20.5287	19.8595	25.7825	23.7016	20.6586	19.1707	20.6671	20.8497	22.5826	22.8113	21.0373	20.7458	19.3209	20.5673	23.3922	24.447	19.202	23.9223	22.3358	24.7094	21.5762	19.5725	22.2111	20.2205	24.5	21.9628	22.8354	19.6942	23.2283	20.8619	22.2174	25.908	22.4111	20.9357	21.8843	23.5373	23.3317
22.9949	17.6953	23.3102	23.2961	25.5463	20.6468	22.7223	24.117	25.06	25.0121	24.1425	20.5745	28.4767	23.3111	18.8994	23.9536	23.3595	24.8141	20.4458	22.4458	26.8012	26.1004	25.9451	24.6843	21.4438	22.1555	23.0163	26.0199	23.8187	22.5305	24.7749	24.8376	23.7328	24.0536	23.2207	22.3454	24.6573	24.3877	25.7196	25.738	25.4475	26.197	22.1686	23.1148	26.7765	27.751	19.5662	21.6747	26.1802	27.6413
19.4342	23.4684	18.2274	18.9769	23.6433	19.1944	22.9083	20.7676	22.5782	21.7442	18.982	19.9546	19.3952	21.5705	18.3877	23.2618	19.2555	18.2888	18.7937	18.5502	18.1739	18.2162	21.0048	18.0938	20.4634	18.05	20.2749	20.4718	20.688	18.6626	19.271	24.4976	21.9135	20.6879	19.3233	18.945	20.6414	21.8822	22.1701	20.2527	19.2209	21.1727	21.5911	22.4438	23.1445	21.3315	24.0876	20.9296	21.2901	18.3114
26.8823	26.5232	26.8117	25.6683	20.5514	25.2056	27.4922	23.5523	27.3345	27.2624	20.7798	23.6626	26.8153	20.9645	25.9833	27.8124	26.5069	25.2777	25.9098	25.2996	27.2284	26.9975	27.9469	26.3278	21.9927	26.9306	25.1938	27.7159	25.0172	25.9661	26.9495	27.2913	28.6096	21.1234	26.6338	25.3321	26.767	27.6754	29.3982	22.3589	26.9787	26.9725	27.1726	26.091	29.0872	29.8617	30.9578	23.2541	25.7992	30.333
19.7493	19.3144	21.6807	19.1158	20.7591	19.2706	20.4563	21.77	19.5074	20.8458	21.2501	21.3605	20.0899	21.8859	18.7627	19.685	18.4901	20.4905	18.4899	20.5159	18.894	18.6642	17.9842	18.8477	20.4302	21.1496	24.1481	23.275	21.4156	21.11	19.9693	21.1	20.2657	20.8021	20.9874	19.8764	23.1304	18.5621	22.1288	20.2026	19.398	22.0512	21.1512	19.2937	20.5586	21.682	24.4508	19.5534	22.9494	24.9681
20.5608	20.8894	20.8509	21.324	22.4067	18.6168	18.61	20.3471	23.2244	23.0945	19.2085	24.5065	22.6508	22.1013	18.474	18.5017	20.1511	21.1387	21.4798	19.4621	23.4704	22.4816	22.668	22.2703	20.6418	19.5769	23.5243	24.5572	22.8883	20.7367	22.7797	22.2737	21.2869	20.4175	21.8724	19.8965	24.7986	22.3155	23.0061	21.124	22.1868	22.1603	24.9064	23.2144	24.3715	24.6681	24.0466	24.5027	25.0675	25.0345
20.756	17.1528	21.7659	19.1025	22.8761	21.2601	17.9896	22.9257	19.6991	22.0138	20.3787	23.2631	20.9748	22.9497	18.4876	18.467	18.4469	21.1071	19.7254	21.4392	17.7148	20.7523	21.7178	18.0577	20.4925	18.2691	22.0918	22.6003	20.7859	18.4869	21.2327	21.3805	20.3322	22.117	20.689	19.8357	21.3386	18.0208	20.9613	21.4168	22.1491	22.4664	23.7923	19.6312	22.3641	22.1249	19.9528	24.361	25.0439	23.1089
20.9115	17.1963	20.4802	20.773	20.2452	18.6536	21.0993	22.6845	19.1596	20.5643	18.9639	20.207	18.0475	22.4399	18.6851	21.6671	21.6733	18.621	17.6983	18.0273	17.7851	19.9707	20.882	18.7277	20.3535	19.2047	23.0723	20.1957	21.2762	20.0255	19.396	20.3803	22.85	21.0485	20.2468	18.921	24.0117	23.4104	24.7296	20.7313	19.3363	24.5173	24.1733	19.984	22.6526	24.2646	23.5809	23.777	25.3501	24.64
18.8039	17.2575	19.06	21.0346	20.0019	20.7073	17.5066	20.2255	22.3967	18.3837	18.5193	19.9298	18.1923	20.2527	18.9773	17.9496	18.5915	17.9059	17.8604	18.1818	20.8512	18.1648	17.4471	22.2987	20.2212	19.5707	20.2434	19.8352	20.5	18.6131	18.4439	19.1915	17.5136	20.6571	19.0758	18.4786	19.9865	17.3201	18.8652	21.1056	20.2901	17.5175	21.8974	20.1415	20.8153	22.2284	21.0766	21.2185	21.3213	20.8471
19.4803	19.1942	17.8645	18.9128	21.045	18.6082	18.2099	20.7814	19.3949	20.2892	19.5021	20.7926	20.0754	20.8999	18.3544	19.0357	20.0692	18.395	18.9761	19.2456	19.519	20.2628	17.9251	17.6676	21.0628	17.6616	20.1547	20.5919	21.7254	19.5118	20.0149	20.0797	18.1974	21.9621	19.7438	18.32	20.2122	19.1628	18.2586	20.3948	18.5592	20.0225	22.5057	19.5931	19.8491	21.9751	20.4422	20.7151	20.9193	22.8154
23.9651	19.6949	23.5598	24.2829	20.7568	23.2113	19.6522	21.5029	22.9992	25.5528	21.4266	21.1183	20.5622	21.1634	22.4601	21.7875	23.1118	22.7239	22.4158	24.655	17.847	24.2688	21.2258	21.6311	20.8209	22.6602	21.579	24.2343	21.6538	19.9542	23.5289	24.6801	23.282	22.5678	24.2498	22.3615	23.5574	23.6997	25.1163	20.6093	22.8865	23.7993	23.4876	21.8556	25.9195	24.2531	21.2637	20.1847	24.3686	27.7136
22.0679	23.0832	18.3239	18.6463	21.7591	19.6902	22.0171	20.2561	23.4216	19.235	18.7486	20.6447	20.2949	22.7631	19.1191	23.0439	19.1635	17.9581	18.337	18.2321	18.3162	19.6721	22.3011	20.2774	22.7984	19.3961	21.1695	23.2313	24.0609	19.0362	22.2319	22.5161	22.5539	21.562	20.7718	18.7573	23.1492	21.3519	22.5422	20.6487	18.3572	21.9942	20.9829	23.3645	23.073	22.2325	24.3007	20.1689	20.2464	19.4197
23.2047	21.1467	22.7707	22.1174	19.9185	21.5208	22.4566	22.2782	21.2999	22.0337	18.3669	20.0888	22.35	20.4654	21.1836	23.9034	21.2241	22.3865	20.1967	18.4885	22.4706	23.1758	23.7759	22.5239	20.162	23.4458	23.3469	21.7821	23.1434	22.5265	22.5557	24.2745	22.6251	20.7794	23.1452	19.793	21.8695	22.9421	25.4121	23.7626	22.8074	23.3965	25.8785	23.7438	23.7938	24.2846	24.6603	22.8149	23.7531	25.9191
21.4719	21.6315	23.0414	20.2253	19.907	17.1376	25.6868	24.6517	23.9465	19.2013	19.6095	24.1442	22.9317	24.3026	19.0886	24.0448	21.9829	18.2264	20.5535	22.0923	18.4596	23.1419	17.5856	22.9632	20.735	21.4216	20.6203	23.1503	20.9295	21.0761	25.1528	23.662	24.5018	20.782	18.6171	21.0458	21.1416	22.6797	23.1177	20.1063	19.7034	24.5393	20.609	24.6578	22.8171	19.6305	22.4677	23.382	20.5047	19.376
22.0512	22.4401	18.3099	21.5131	20.4627	18.498	21.5556	24.2733	23.1064	21.1602	21.3463	23.4048	21.1325	23.7135	19.1798	25.1289	18.7946	18.731	17.7014	18.803	18.6548	22.7614	22.3057	18.6733	21.0356	21.8508	22.5279	20.657	25.8136	20.3437	22.9435	21.5428	24.7568	20.7397	20.729	20.3415	23.2411	22.006	24.1725	22.9371	19.5158	24.1197	20.4711	23.9892	25.4161	23.8608	24.4061	19.5745	22.1497	23.0384
22.6309	17.4945	21.1922	19.1123	19.8434	19.3916	22.7139	24.2035	23.4853	21.9133	23.2313	24.2672	19.1211	23.0916	20.6021	23.4217	21.3479	20.8647	18.088	20.4774	19.7614	18.9533	21.6086	22.0126	23.7961	18.6384	22.6831	23.3736	24.4281	18.1176	21.9843	22.1999	23.0968	21.3415	21.4474	17.9622	21.322	22.0073	23.0685	24.4298	21.5848	23.841	21.2349	21.2669	23.0139	20.0068	19.62	24.233	23.272	20.1299
22.4812	18.8505	20.105	19.4754	20.5285	18.8518	20.3281	22.7515	18.6094	22.132	18.6338	22.4768	19.2717	20.4678	19.0416	22.3671	20.9829	19.653	17.0447	20.3228	18.1039	19.0035	22.6949	19.2059	23.3801	19.1066	20.2692	21.2391	20.8233	18.5865	18.7904	20.7391	18.6281	21.1853	19.6068	18.617	20.2232	16.6055	19.499	23.4206	18.8799	23.4425	20.4439	20.664	19.9007	19.6525	18.4799	20.2871	23.5285	22.2706
21.0656	17.6858	20.4579	19.4577	21.1635	17.1583	21.5201	20.5977	22.1632	22.5402	18.5591	20.5275	18.7059	20.6613	19.5097	23.7193	20.9846	18.7697	18.5012	19.0128	17.8218	19.0731	23.8052	20.4758	20.7674	17.32	22.9106	20.3033	20.7552	19.4895	19.9441	24.409	22.8261	20.8829	19.4117	20.5012	20.5981	19.9556	21.3786	21.5285	19.2825	22.9597	21.4337	18.8496	20.772	17.1119	24.6119	20.1316	21.1912	20.2057
23.8319	16.5028	23.0891	20.3495	22.1759	21.5693	22.6606	22.3793	23.3046	24.3861	22.1706	20.4669	20.0231	23.2667	18.6634	24.3954	21.9368	21.211	21.8554	21.9096	24.9263	21.0277	23.0565	23.4247	24.5695	18.6951	24.6261	22.2101	22.822	22.3442	24.0878	24.1528	23.4016	23.3719	22.706	22.9153	22.79	22.5816	25.9137	24.1049	22.9549	25.9803	22.7971	21.8022	22.5071	21.9807	18.8687	23.4267	23.7403	22.1946
28.4386	27.9098	27.2811	27.472	21.8119	26.8223	27.9799	22.9906	26.8361	28.5614	29.687	23.6961	25.5133	23.6535	26.6311	29.5256	27.4481	26.9552	25.9113	27.4629	26.3429	27.8015	29.3437	26.4255	24.8731	27.0238	23.8308	24.7978	27.915	24.5504	27.9308	29.1028	29.0953	24.1365	27.4074	27.1182	25.7774	28.5507	28.3383	24.7964	26.6482	28.4969	22.4677	28.0948	29.1827	28.5604	29.5929	24.6454	25.3095	28.3641
24.8337	20.3905	24.537	23.482	24.3666	22.8423	25.928	23.4168	24.7533	25.7128	25.661	21.1102	24.0206	21.4299	24.8667	27.0191	23.4173	24.9069	23.7626	25.0181	23.7762	26.3365	25.3588	24.5532	24.9962	24.4491	23.6135	25.1598	25.8858	23.6685	25.177	23.8037	26.3647	23.662	23.1843	22.5129	19.536	25.1861	25.8109	25.1992	23.3569	25.329	20.9406	26.5253	26.867	25.785	24.5816	23.9476	23.6108	25.1976
21.549	19.7008	18.8929	20.7587	20.8432	20.0201	20.8232	22.5495	22.6082	21.4492	22.908	23.4842	19.0895	22.8976	19.8334	21.2281	19.934	17.7727	20.0941	21.1042	18.463	19.6815	20.3352	21.1128	21.2757	18.6457	21.6555	20.5342	24.7399	21.1422	21.726	19.7846	22.2273	21.2831	18.7192	18.3229	20.8113	20.7743	21.1484	22.9901	21.1152	23.7264	20.8581	20.5284	22.9	20.724	19.2203	21.2435	24.6758	20.6446
22.1635	22.3896	21.8564	21.9082	20.5991	17.4152	22.6257	23.2948	21.4758	21.3062	20.8813	20.6103	18.6589	21.7072	21.9912	22.95	20.3993	20.2192	21.1049	20.6601	20.4574	18.6047	21.3808	20.1482	24.1346	20.5977	20.6446	23.4569	23.5603	19.5486	23.315	22.8523	23.3479	21.5627	22.0595	19.0379	20.9288	21.6914	23.8027	23.1828	21.386	22.9812	21.2235	20.3609	21.1179	21.4451	22.8985	21.8632	21.8712	21.0503
23.0073	17.8421	20.9379	19.2187	20.5766	20.6298	19.2761	21.6213	21.2743	22.3117	21.7209	22.5358	19.3072	22.9986	19.15	22.2433	20.2789	19.5345	17.9644	20.4579	17.5986	20.6778	23.2986	19.4416	22.3101	17.1576	20.6643	21.3655	23.73	18.5936	22.3688	21.7193	22.595	20.5996	20.0929	19.4121	21.1019	18.5431	22.2841	23.0846	21.4156	22.7947	20.8743	22.4882	22.6694	20.2633	19.2713	22.0805	24.3879	23.4188
25.2699	26.3349	24.3293	23.9143	21.0378	22.7182	25.1652	21.1818	23.6401	23.9896	24.594	22.7914	17.9757	20.6725	23.4078	25.2342	24.0737	23.0095	22.3407	23.1139	22.1336	23.9977	24.9678	22.7033	20.4263	23.297	20.583	23.0094	23.521	19.3255	24.7095	25.455	26.2072	20.5585	20.0309	21.8003	20.3613	24.2366	24.7483	23.1883	21.5915	24.6488	21.7556	25.4749	24.7859	24.0007	25.9849	21.0872	23.3498	24.682
22.0507	18.5514	18.0159	19.7549	20.6803	18.8746	18.2231	20.2903	19.6755	19.4568	18.4401	20.67	18.13	20.3897	17.4731	19.8848	19.9694	18.7419	18.619	20.6993	18.2636	21.0002	23.1757	18.312	19.8393	18.7343	21.2069	21.1835	21.7307	19.1867	21.1033	19.1732	17.2788	21.2466	20.2333	19.4589	20.1365	19.0385	21.5693	20.4309	19.3408	18.8533	20.9812	22.9815	21.1124	23.6228	19.4488	19.5022	20.6371	22.9907
19.0452	19.8609	18.4334	18.9854	20.2239	22.1835	23.0388	20.4549	22.2324	18.8492	21.8639	19.857	19.3948	20.3951	17.9937	21.1235	18.6386	20.9037	19.4092	18.3947	21.254	20.7582	21.2259	22.0906	20.4292	18.2704	23.1161	24.1731	23.9129	19.0255	18.7141	22.7869	21.4026	22.4377	21.87	20.0989	20.1432	20.6181	23.2993	23.2158	18.593	22.5204	20.8743	19.6777	20.4055	23.4825	24.5889	21.9557	20.3332	24.0935
19.6945	17.1086	19.3119	19.3555	20.8473	18.2233	19.3272	21.5231	19.5617	20.1469	20.064	20.2957	20.5997	23.0118	18.9703	20.8582	20.5158	18.4278	18.582	18.8698	18.0576	19.4717	18.5391	17.9886	20.1866	17.8382	20.3685	20.6501	20.4635	18.8462	19.4413	20.09	20.4061	21.2414	21.3872	19.7971	20.5257	20.3633	21.5459	21.635	19.4432	20.1274	20.6262	19.1849	18.6747	17.7066	20.447	23.6122	19.616	22.889
19.5024	19.6731	17.6835	18.807	19.6594	18.3869	18.4222	20.9835	19.7749	19.772	19.0333	20.2433	19.4931	20.5001	18.0597	20.9909	19.0584	19.7324	18.5092	20.6824	18.5584	21.3554	17.8693	22.4979	20.862	17.8425	22.695	21.1257	20.5286	19.644	21.0304	21.3823	22.5324	21.3751	20.7979	19.3956	20.0162	21.6482	21.8989	22.5832	18.2881	18.6536	20.6158	19.0437	23.1779	18.6388	19.6587	23.2742	21.479	19.5393
18.4012	19.0437	18.7773	19.2842	20.462	19.1494	19.3711	20.7015	19.3299	19.6217	19.2929	19.7824	18.951	20.2395	19.8236	21.61	20.289	19.1938	18.9003	17.6788	19.6798	18.2734	16.4298	19.5656	20.9455	17.3797	20.7249	21.1227	20.5801	19.2778	19.1638	20.3728	17.4039	21.498	19.0255	18.5878	21.0994	19.4371	18.4718	20.2272	19.0145	19.1549	20.5875	20.5393	20.1902	21.0741	18.9631	20.5284	20.5953	18.5176
20.2844	19.203	20.2486	19.2579	20.9885	18.0421	18.0709	21.1394	18.9366	20.4894	19.1884	20.463	19.1608	21.0245	20.6467	19.0136	18.4716	17.7588	19.2469	18.5945	18.5162	18.8179	19.0842	17.5006	20.3638	19.2672	22.3254	22.7091	21.659	18.228	20.205	19.7467	20.6661	21.8812	20.4434	20.0184	22.1983	20.4969	20.1886	20.8174	20.4737	20.3883	20.4174	20.2366	21.2346	21.2945	20.7543	20.6781	21.7424	22.8502
20.1434	17.316	17.4132	19.0663	20.2191	18.2348	17.9772	20.45	20.2163	21.0494	22.4871	19.9635	18.6779	20.8479	17.5355	20.7004	20.0025	18.3782	18.2468	18.6362	19.1065	18.4419	19.6963	17.1719	20.5199	17.1786	20.4136	21.3445	21.237	18.8805	20.0457	21.0208	20.9182	20.8235	20.0461	18.5166	20.2576	18.359	20.7185	20.348	18.2809	19.7399	20.5603	18.9241	18.7933	18.9686	19.0632	22.9959	22.6918	18.0551
19.7767	19.5143	18.7953	18.9183	20.7818	18.5329	20.3431	21.3302	20.0052	21.4191	20.3051	21.0494	18.1618	21.4357	17.7934	22.8069	19.9275	18.97	18.6929	17.9725	18.0916	17.1154	21.2243	19.0961	20.1154	18.0551	20.3719	20.9417	21.9604	20.0414	20.4642	21.5472	21.0931	21.2985	19.369	19.9673	20.8759	21.6452	21.7015	22.8898	19.2679	22.9728	21.6784	19.9889	20.3248	21.4062	20.2456	23.3035	19.965	18.2111
26.5627	24.5918	24.615	25.2154	24.6166	23.764	25.8039	25.1698	25.2356	26.9635	27.7808	25.7878	19.3495	25.2588	22.6925	27.0546	24.8637	24.8128	22.8191	25.3924	24.2458	25.5008	25.7816	23.9591	25.1279	22.6304	21.8265	25.9007	25.5235	18.8268	25.3903	26.1067	26.7431	24.9327	25.0743	24.6545	24.2879	26.1772	26.0753	24.1503	24.935	26.5903	23.9234	26.199	26.4149	25.3182	24.3151	22.8311	24.1785	25.5523
18.6666	19.2212	18.1345	21.3324	20.9977	19.0385	22.0461	20.1934	18.7865	19.4735	19.379	20.3589	19.266	20.2174	20.1231	21.4787	22.6041	18.9118	18.8174	19.8476	17.8344	18.0341	18.2835	21.7727	23.5846	18.4334	21.1752	20.6028	20.9431	19.6108	18.2901	21.1689	21.4523	23.4672	20.3833	18.6834	21.2886	22.7361	21.4711	20.6833	19.3429	19.0045	21.6696	22.7292	22.2521	22.002	20.2008	20.9163	21.0376	23.8268
22.7035	20.8907	20.3735	20.3448	20.4761	21.1385	21.5599	23.015	21.4609	21.3237	18.5735	22.0869	20.1865	22.9393	22.6478	19.1818	21.9836	17.7482	22.3471	21.6218	20.0955	20.4972	18.6135	22.9144	22.9388	17.4678	22.2032	20.2933	20.9657	22.8691	19.2383	18.6232	20.4449	21.6912	20.6779	19.4964	22.2594	19.2922	20.3162	19.9544	23.0142	20.9695	20.6137	20.6691	19.5167	17.7136	19.2042	20.4105	20.1526	18.8069
22.3567	19.3529	20.1758	19.419	22.9892	22.6955	22.317	20.1659	22.0189	19.738	19.5873	20.6161	20.1818	22.1623	21.5234	19.4032	22.2639	19.8164	22.2261	20.2888	18.8415	19.2245	20.3785	22.0165	19.8188	20.6462	20.6969	20.1653	21.0215	22.1443	19.9967	19.987	20.3567	21.446	19.7924	19.0915	19.6819	17.155	20.0186	21.7615	22.831	20.192	21.2341	19.2835	19.1507	17.7088	19.8955	21.1551	19.6568	19.1048
21.0046	16.945	22.8232	19.2464	20.7323	22.4041	20.8267	20.5293	22.5683	20.7666	19.4328	20.7064	21.6998	20.7564	18.6339	20.2271	22.809	20.5751	18.9805	20.7608	21.683	21.4252	19.3702	22.1493	21.1887	23.0092	20.6323	23.1357	20.2548	21.6859	20.6924	21.0324	20.7613	23.5924	21.3559	22.949	25.0906	20.709	19.3549	20.4075	22.0567	21.1702	21.1099	23.2507	20.8086	19.4176	19.947	20.081	19.9197	20.2781
23.1173	18.082	17.5454	19.1169	20.8905	21.7917	21.4682	20.532	18.74	18.8991	19.4144	20.3402	19.896	20.727	23.6014	17.5159	22.5619	20.4017	21.8538	18.891	19.2135	19.7032	18.0214	24.5354	21.7014	22.7546	21.4789	22.8216	21.5439	19.3116	21.4601	19.6586	21.6002	21.1663	19.6328	18.995	19.6962	16.8596	22.6487	20.3916	20.9241	19.199	22.4162	20.6896	19.5445	17.7848	18.6929	20.3241	20.5077	18.8915
22.5366	18.3036	20.6853	19.4512	21.1154	22.3114	23.2626	22.3897	23.5011	23.4557	19.7186	20.4546	18.7317	24.529	23.6217	22.2945	22.3144	21.3794	21.6622	22.9903	21.176	19.1599	17.0195	23.5735	20.2911	21.1224	23.1431	20.8734	20.8483	21.5746	20.9988	20.2832	20.9161	23.9308	19.8744	19.451	22.1694	16.1198	22.055	21.2915	22.4888	21.3182	21.3321	20.6496	20.7446	19.0718	20.3954	22.5959	20.8247	18.1376
21.8829	19.3084	19.38	20.6915	21.4762	22.321	22.2539	20.8637	19.2942	23.0951	19.0727	20.7838	19.856	19.9496	21.9351	20.5667	18.2255	22.2128	19.6964	23.8394	17.1797	18.8055	17.2081	22.5309	24.8334	22.2863	20.7336	22.722	23.1668	19.6448	19.3893	18.4694	22.5096	22.2509	22.4397	20.2854	20.4259	20.9235	19.0316	20.5378	20.5722	22.3881	20.1854	18.6757	19.9264	17.6146	19.2604	21.2005	20.6807	19.1303
21.7799	17.1935	19.6751	18.7341	19.7082	22.3473	23.1776	20.9579	20.7382	18.4853	19.9278	20.7722	20.3273	20.921	23.5186	20.1461	20.2904	18.3071	21.116	20.3214	16.5863	19.3049	18.5878	23.918	21.0455	23.1434	20.6005	22.6941	21.449	20.1025	20.3995	20.5986	19.7154	21.548	18.5461	19.9125	22.4756	19.7984	22.6095	20.4599	20.7532	19.6569	21.9404	22.9171	19.2287	17.3562	20.6156	20.6166	20.598	19.5868
22.075	17.311	22.3024	19.3969	20.5985	22.66	24.2562	20.4214	22.4835	21.1215	17.5594	20.4995	19.6304	21.9253	22.9031	19.2183	23.1953	18.4353	22.8073	22.1758	21.7865	22.6681	18.0164	21.9859	20.6288	21.0296	21.1193	21.0968	21.3811	18.2644	20.0094	19.6545	21.8678	21.2375	19.9985	18.1152	21.7416	18.3584	20.5519	20.3966	22.3924	19.7354	21.9893	19.5656	19.76	18.547	20.4743	20.0852	21.356	18.525
19.2881	19.3003	20.4473	17.9194	21.0645	21.0035	22.4624	20.6079	19.7224	18.2525	19.9062	20.0113	19.3131	20.1127	24.151	17.7941	23.399	20.6237	22.9355	19.0386	17.7167	22.434	17.6947	22.0378	21.3259	20.3599	21.0508	19.7371	20.9395	21.9542	18.9862	20.7453	19.9021	21.9085	18.6626	20.2485	19.5087	20.9051	18.6211	19.7744	20.5664	20.6382	23.208	20.0285	19.1801	17.6928	18.8281	20.12	20.1428	18.6488
19.2387	19.0013	18.7873	19.1602	20.8862	24.2653	20.5188	20.8791	19.1367	18.8658	21.2853	20.7049	18.7762	23.7654	24.2246	17.7797	18.8892	23.1865	22.724	25.024	17.895	22.0976	18.9133	24.1525	21.8872	17.4893	21.4746	20.8783	21.0934	19.1218	19.4071	20.523	18.0413	20.2594	19.8034	22.1662	20.3874	18.1755	19.4985	20.5825	19.2136	19.2549	22.1151	19.703	20.51	18.4998	19.8805	20.065	19.4357	18.9725
21.5536	19.7334	21.8777	21.4931	22.5764	21.0406	18.6136	20.2594	21.4167	21.5019	20.8134	19.8347	22.8896	21.4361	18.4541	21.3303	22.4819	22.698	21.2726	21.7603	20.005	20.7195	21.5529	20.8621	20.3768	21.7462	20.1869	23.4998	22.7552	19.9152	20.3034	24.698	20.7347	22.2998	23.459	20.1888	23.3229	20.9428	22.612	20.6608	22.8009	21.7239	20.1319	21.9848	21.7239	19.7538	19.3754	22.5066	20.3732	22.1158
22.1856	18.6244	21.1183	20.1167	20.5019	23.3598	23.8548	20.6962	18.5973	20.374	18.6645	20.4549	19.0747	20.6771	23.9845	18.6071	22.4843	19.3893	21.0954	18.5299	21.7333	19.9583	19.2389	23.1589	19.9885	22.1139	21.1631	22.322	21.0407	20.399	19.5069	20.3135	23.2909	23.2535	19.6889	20.34	20.7162	21.4749	22.4034	20.109	19.973	22.5671	23.7426	19.0016	18.521	18.0706	18.946	23.0957	20.9678	19.7604
19.3469	17.5731	19.7652	26.6085	20.2698	18.4704	21.5797	20.5023	21.5063	24.689	20.11	20.1121	19.8616	20.4991	18.4887	18.6214	21.7293	17.9443	23.2737	21.5085	18.0591	19.251	18.4629	28.3674	20.2455	21.1969	20.9107	24.2673	20.7975	19.6613	20.405	20.0177	18.3089	21.3092	19.4674	23.866	20.3209	20.0825	18.6546	19.6818	22.0179	19.4072	24.1025	22.4012	19.3239	17.826	18.8046	19.9575	21.0254	18.6459
23.5786	19.8523	22.9091	23.5436	22.9213	23.9812	24.9202	20.9804	24.0788	21.8133	20.8446	23.41	22.2267	23.6998	23.1167	21.9435	22.5728	22.4335	23.4109	23.9217	23.2583	21.4357	18.8266	24.3286	23.532	23.9113	21.0412	20.2309	23.2232	22.7478	22.3391	22.7194	20.426	24.9901	22.5713	21.2331	22.8422	21.8571	23.3727	20.4002	24.3532	23.8286	23.4096	22.2272	19.8767	17.3305	20.6515	21.2523	20.6448	18.4512
22.0092	18.1926	22.3004	21.8732	20.2959	23.274	21.7949	21.2495	18.64	22.6155	19.3514	20.914	18.756	20.9361	22.7673	21.738	22.6157	23.5653	23.2381	23.9874	21.7198	20.5829	19.0762	22.3486	24.246	22.0848	20.5655	19.7949	21.3007	20.2685	18.8547	20.1554	21.4223	21.1361	22.2123	21.0595	19.8324	17.5531	20.9163	20.6898	23.2816	20.2904	23.4705	21.6597	18.3777	18.971	21.069	19.8103	20.56	20.1235
25.1259	24.3046	25.8919	24.7348	23.1879	25.2349	23.2245	24.247	27.0457	25.4079	24.3395	21.9746	26.4992	24.1129	25.1518	21.6833	25.6522	23.4622	25.7228	24.2175	26.4401	21.9975	24.1688	26.3854	23.175	24.9204	23.07	24.3758	21.7568	27.1061	23.7145	24.9492	27.4126	23.0686	21.1899	24.4985	25.4334	25.361	25.4192	20.4639	24.8134	25.218	22.2541	25.4033	22.6421	19.2823	20.9791	25.1124	24.0875	17.8183
20.8485	18.9849	22.4856	22.8878	22.863	22.0854	24.4146	22.7978	20.7337	23.029	19.6697	20.3596	21.0956	23.6411	21.4915	20.2097	22.1152	22.7794	22.6881	22.9444	22.482	22.2358	19.3489	20.6194	23.1758	21.6307	21.8537	19.7168	21.2397	19.2433	22.017	19.4113	17.392	24.0442	21.1967	19.0924	23.0034	20.5366	21.8122	20.9245	22.2074	19.9632	20.5172	21.7998	20.4363	17.8638	20.0617	20.7198	20.3212	19.51
22.8803	18.5386	23.618	23.0474	23.5965	23.6281	25.1484	20.7261	24.8545	23.7872	19.0221	23.6422	22.7733	23.3718	24.2317	23.4078	22.7206	21.9836	24.0356	22.8096	24.8531	22.8026	20.365	26.0715	25.142	23.759	21.4279	25.7751	22.2551	24.1259	24.1666	23.5522	23.5658	23.8915	20.0942	22.8693	24.9695	22.9238	24.3228	23.7828	23.8452	22.5433	24.7579	18.6892	20.2793	22.9187	19.7946	21.5367	24.5578	20.81
25.3014	22.0662	25.0641	23.7918	20.3681	24.8613	24.7672	19.9873	25.3451	24.7455	19.622	21.2486	23.2421	25.9482	25.6621	24.51	24.7473	24.5203	25.2385	24.4767	24.1441	23.4347	17.3869	24.7039	23.3682	25.9823	20.1121	25.8241	20.0504	26.616	25.8502	23.4664	23.4108	23.5758	23.8671	21.3476	25.3234	23.3676	24.8223	20.1743	25.6885	24.322	21.9957	25.2732	22.1019	22.6434	24.0981	24.7272	19.9778	19.9666
23.7638	18.8033	21.4556	21.1465	22.0414	24.1237	22.2981	20.5692	22.8536	23.4657	20.0855	20.5924	19.4508	20.389	22.2066	20.7431	21.5262	19.4157	22.6774	22.9099	20.7007	20.6628	21.0486	23.3864	23.3815	21.5102	19.9426	22.3636	22.1361	19.8385	19.4866	23.2167	20.0843	20.5421	18.8543	19.8635	20.5935	21.5046	20.7029	23.4681	23.4216	23.0463	21.3631	19.0321	18.3765	18.8763	19.2444	20.0878	20.1253	19.5521
19.1133	18.7334	22.5974	18.9785	20.2771	20.3047	17.0555	21.0765	23.8852	19.5568	19.596	23.7863	21.3112	26.6078	24.0503	17.8421	19.9632	18.2302	19.6272	21.8448	17.7054	18.2118	19.788	18.251	22.6282	23.9511	20.6805	23.9664	20.8773	18.8139	19.4609	19.7673	18.4038	21.6175	19.7881	18.5259	24.6662	18.4777	23.0069	20.0208	22.6208	20.4437	24.4916	19.8351	19.7083	19.2696	19.9931	20.4277	20.101	18.9662
22.5722	17.3811	21.5716	20.3263	23.4887	18.4222	22.359	24.3694	21.008	18.6996	19.8595	20.7196	17.7592	19.9162	24.0692	20.6072	23.0508	22.8563	22.8842	23.3747	21.724	19.7117	18.0654	22.9711	20.2082	23.1534	21.6285	20.5165	20.9034	22.733	18.6598	19.6685	20.2811	22.5547	19.8277	23.1841	23.7511	18.2377	18.7551	20.4329	22.1693	21.6616	22.3641	21.1926	20.5218	17.6082	20.3502	20.0906	20.0768	19.318
20.74	18.1093	21.2687	19.0831	23.8257	18.9396	22.6046	20.5236	19.4964	21.6882	19.0463	21.7696	18.7453	23.2287	24.3161	18.62	21.8681	19.0117	23.8174	23.3956	22.5994	19.1412	18.5747	23.3082	21.5993	20.8686	21.0488	20.1237	21.9521	19.3347	19.4271	19.6284	21.8359	24.1546	20.9499	19.1849	21.2559	18.4733	23.0217	19.879	22.8664	23.1523	21.7092	19.2989	19.7563	18.0406	19.643	19.712	20.6768	19.2578
23.4767	18.9246	24.3454	24.6646	19.9708	23.6723	25.738	24.251	19.0802	23.1677	19.1061	24.0124	18.0324	24.8944	24.2331	23.9482	23.7003	23.9406	23.9115	23.5054	24.0554	21.6814	18.0202	24.7232	23.3847	24.9027	20.839	24.6507	25.4317	23.5524	23.5576	20.0387	18.6214	21.0235	23.743	21.4886	24.2528	23.1438	25.2417	23.7348	24.6704	22.9226	22.9933	24.1991	20.563	18.4269	25.2692	20.67	20.006	19.3109
19.1869	18.7139	23.527	22.3224	20.8924	21.9853	21.6743	22.6275	23.5898	21.6764	19.7528	24.4029	25.5781	20.1513	21.9906	18.2993	22.2885	26.399	23.7835	19.8535	26.7627	17.7657	18.1763	27.0397	22.0498	25.5551	22.8916	23.9156	20.8527	24.5872	24.5861	20.4876	17.3402	20.3794	21.5142	20.2071	24.4856	22.4082	24.9123	20.8078	25.7275	20.0231	23.4206	22.1701	20.8639	18.2011	20.1259	20.7825	20.1307	19.8715
22.8258	16.5459	22.3899	19.1308	22.9171	23.0566	24.4765	23.0821	23.2012	19.8887	20.3339	24.3157	18.5858	24.3458	24.897	21.036	22.9972	19.8664	22.7048	22.8098	22.4138	17.7424	18.6717	24.2986	24.8995	23.1409	21.3184	23.6542	20.9135	22.7578	22.5371	19.6711	21.1669	21.1185	19.3569	20.1965	22.8438	21.54	21.9874	23.1167	23.1655	20.8341	22.2926	20.2186	18.8319	21.1782	20.4612	20.4589	21.3564	19.3962
23.5054	19.3276	23.6074	23.6625	23.1529	23.8629	25.1325	21.4748	24.2654	22.5665	19.4815	19.9116	22.0949	24.2815	24.4774	20.2239	23.0656	23.163	23.1276	24.6376	23.4721	21.9146	19.1026	22.7521	23.2851	22.694	20.6434	21.7221	21.4674	21.8949	19.234	23.1907	21.4062	20.9909	22.7621	22.7597	23.061	18.5322	22.791	24.1474	24.9585	23.3199	20.3042	21.2171	19.0886	18.1505	20.2945	19.3727	22.0976	19.8853
23.7556	18.8015	21.7043	21.6187	19.7053	25.819	26.3497	22.0934	21.126	24.6378	22.1376	21.7042	18.5558	20.7365	25.956	23.5975	22.5299	23.0685	24.8348	25.0056	23.169	21.3576	18.1637	27.1218	21.1744	23.2786	21.1938	23.5386	23.1963	19.2381	21.8219	22.9098	24.9799	21.0254	20.4178	23.1738	22.0665	22.3241	22.4669	19.9884	19.9678	21.7075	24.0104	22.6225	23.4812	18.4367	21.1306	20.5415	21.2733	18.1412
24.5744	18.4352	24.3708	21.2287	20.5641	25.9723	22.7634	21.9585	23.4984	23.5777	19.2074	20.5704	21.5364	21.2119	25.7265	21.303	25.9321	22.9144	25.5626	25.3278	24.0011	22.8608	21.2518	27.1142	23.4484	24.1043	20.9161	20.9538	21.6699	25.5758	22.325	22.5218	22.7877	21.3115	22.6728	23.0854	24.2921	22.616	20.7525	20.4344	23.3449	23.6189	24.335	19.5946	18.9903	17.5608	19.7994	22.9834	20.597	21.3127
23.9228	18.2536	23.8466	23.6951	20.507	22.8591	23.4882	23.956	23.7747	23.7715	19.3743	22.9995	19.3995	23.5802	23.8119	22.1286	24.1556	23.412	23.8769	24.7762	24.3699	23.5955	17.939	24.2339	20.1215	23.448	21.2928	25.2774	21.8597	23.2862	24.035	19.5747	22.2082	21.2932	23.6394	23.8885	23.5339	22.7039	23.4389	22.388	24.0093	23.8362	21.6228	23.4969	19.7508	16.8089	21.1178	20.3383	21.3478	21.156
23.8168	17.3005	21.8505	26.2046	21.5005	23.1863	24.439	21.4259	25.3859	25.1926	19.6656	20.235	18.4992	20.8085	24.4782	19.6068	21.5231	18.8308	22.8285	21.8616	17.933	18.2026	18.3957	28.2605	20.8061	23.437	20.2666	25.0488	20.5348	18.6496	19.052	19.9631	18.0778	20.6798	19.1216	25.0504	22.2004	19.6203	18.1547	20.1042	19.0864	18.9232	21.8651	24.9879	19.0234	18.8951	20.6153	21.188	20.2082	19.8494
29.1144	27.282	26.1834	29.734	24.1981	26.8223	24.2278	21.4965	29.0975	29.0413	26.7428	22.6449	25.3651	23.9848	25.2467	26.8767	24.1466	23.5552	26.8116	25.8535	28.3054	24.5341	27.7561	28.7053	24.0594	28.171	25.5851	28.5359	27.9357	21.4304	28.9908	28.2182	23.5681	26.499	28.0853	28.1117	27.3073	28.3525	27.705	25.5897	25.1463	24.9323	26.1195	26.5776	26.7116	25.341	18.6774	21.9381	24.3425	20.2429
24.1375	22.2205	24.9729	24.836	24.6333	23.7498	24.1591	24.2739	25.3968	24.8137	22.0975	23.9619	23.5655	25.5989	24.1516	22.4053	24.6354	23.9123	24.797	23.5408	24.4971	21.9357	22.7241	26.0217	21.0963	24.8615	21.3805	24.7251	23.1177	24.133	26.0704	25.0147	22.6018	22.2696	22.6747	23.7539	24.7077	24.1646	26.3339	24.5232	25.3683	24.7479	25.15	23.7259	20.651	21.6572	19.2545	21.1575	21.2743	18.7828
24.4739	18.3617	22.7709	22.7967	22.341	23.0895	19.5429	21.0992	23.4483	25.776	22.6063	20.5678	23.9078	24.0257	24.7176	23.3052	24.3976	23.5225	24.3686	24.5437	23.4247	25.0326	23.0597	23.691	26.016	21.7801	21.3026	20.295	23.488	24.2303	22.4056	23.1718	22.4801	22.4639	21.754	22.7716	23.8636	23.2246	22.9808	23.9353	25.0597	23.7471	23.3793	23.9519	20.1861	20.0018	18.4179	20.5829	20.0935	19.6855
25.1288	19.2114	23.7587	18.4364	23.391	24.005	26.5082	24.7775	24.0941	21.0261	19.1856	19.8641	18.8671	24.8216	26.7685	22.4193	23.8414	20.3281	24.58	24.6054	19.7954	22.2587	18.7643	26.4531	23.8853	23.4364	22.0805	21.7158	20.0761	23.1139	21.3753	22.2683	23.6813	21.7615	20.0091	22.4626	21.1341	21.5261	20.3882	20.1893	23.2123	22.8384	20.8763	22.1833	20.4528	18.6068	19.4036	21.838	20.7116	18.0982
24.3913	19.8558	25.5167	23.9373	22.7564	24.6753	22.7787	23.9502	24.2463	24.8341	19.1624	22.1422	21.8785	23.4044	25.1987	23.7505	24.3208	24.5451	25.2616	24.6931	24.4159	24.7447	22.9335	25.7965	20.5393	24.395	23.6027	22.7255	21.0443	24.5715	23.0109	23.7414	22.838	21.4875	23.7367	23.9867	23.4475	21.1557	23.5938	19.8642	25.2429	24.5702	23.5865	24.9224	20.4473	19.2506	19.864	24.2285	21.3563	18.247
22.9034	19.548	19.8445	19.229	22.9438	23.2893	22.2712	23.364	22.7374	22.7966	19.0087	23.4199	19.1981	25.4408	24.2437	18.5028	22.2356	21.2953	23.6537	24.1615	17.2745	22.3874	19.1677	24.7136	23.485	20.6964	20.4744	20.9898	21.1163	19.4316	19.1498	20.5909	20.7649	23.8881	19.8871	19.1058	20.4361	18.0334	20.8637	22.7834	23.0581	21.9697	20.3746	19.7671	20.1345	18.1647	20.3783	19.7823	19.8505	18.0342
19.7999	16.6727	23.6055	25.09	21.9977	24.1504	22.7802	22.1141	23.9205	18.9418	19.3857	20.1891	21.019	19.8432	24.0276	18.5486	24.1272	23.7491	24.4025	20.4151	24.0899	17.54	17.8445	21.2324	21.1843	22.2327	19.9279	20.6937	21.035	24.3421	19.5594	18.9972	17.9969	20.4402	19.7352	25.6423	22.852	22.6189	23.6953	20.3813	23.1489	19.5221	23.6764	24.4208	18.8584	19.2891	19.6002	20.2706	19.9109	17.5924
22.9437	20.2814	22.9536	22.247	21.0709	22.6134	24.1651	21.3236	23.5169	21.3013	20.3147	20.5073	18.773	20.3339	22.1654	22.2505	22.475	20.0635	24.0243	20.4141	22.4777	20.8395	18.0285	26.2079	19.5454	23.0276	20.9706	24.2366	20.1516	22.983	24.9655	23.2641	20.9791	22.775	22.5085	20.0899	20.4485	18.9773	23.8851	23.2732	23.5278	22.848	21.1473	22.3143	19.4685	17.0816	18.9619	19.8499	21.5948	20.21
25.7422	20.1647	23.447	19.2396	22.9765	24.3849	25.4076	19.9494	24.4375	22.458	20.4121	20.4356	20.2297	19.7325	26.4858	21.9121	24.1514	20.2181	23.5124	24.7699	18.8461	20.0507	21.1383	25.3271	21.2874	23.2506	19.5986	24.3913	20.8454	21.1593	21.6142	20.8309	23.2819	22.8862	19.6398	20.9194	19.6439	18.9943	23.6665	20.3607	24.3987	22.453	21.8924	20.4755	19.3304	18.0893	21.0267	20.4751	21.1349	20.2063
23.7374	18.6015	23.9558	23.9129	21.8545	26.5618	25.1848	21.7607	25.1166	23.5784	17.4118	23.5055	26.89	20.1873	24.1185	18.2099	26.7847	23.9129	27.9261	23.7875	27.2603	22.5132	24.2964	25.5156	23.1779	22.5413	20.1232	24.5886	21.3917	28.5853	24.3527	23.4289	24.6209	20.9719	21.1207	22.0348	21.0368	22.6171	24.8683	23.9308	27.2975	24.8283	24.7561	24.8857	20.5566	23.3897	19.5632	19.8413	20.335	20.136
24.2865	18.296	24.3076	26.4568	24.0677	24.6973	23.717	20.7422	24.3696	24.4978	22.1797	23.5499	25.6086	23.0848	24.0314	22.8475	24.6901	25.7967	25.0621	24.8919	25.9278	23.7317	18.7669	23.5398	23.6131	25.5648	20.6666	24.5564	25.4561	24.7802	25.4871	23.4096	22.5527	20.7223	19.825	24.0732	20.555	22.6935	24.9212	22.6643	22.9322	23.4682	25.7953	25.6409	21.9507	16.8978	20.472	20.698	19.3089	18.1953
24.9067	16.0622	23.0612	22.9183	21.6177	26.1557	25.4795	21.0512	23.1983	24.4458	23.9548	21.0588	19.5583	22.5568	26.9304	23.7171	24.4664	24.6921	25.2502	25.9729	22.0431	23.7042	19.8357	25.3694	20.7162	23.8887	21.3453	20.977	25.017	21.9722	21.2303	21.7818	22.8124	24.7212	23.9723	25.4299	22.9013	22.5353	22.5244	20.1708	19.5158	21.9309	20.4463	19.8129	23.553	18.7874	19.9503	19.503	20.2511	21.1535
18.892	19.0581	25.032	24.2594	20.8097	20.8997	25.5901	25.8141	24.5714	23.8986	18.2577	19.7015	23.9708	21.3383	24.291	18.6398	24.9467	23.5761	24.9852	22.1926	27.0089	19.1316	19.1214	26.3867	25.0197	23.1304	24.8984	22.8725	21.097	27.8373	24.6922	20.6985	23.9515	21.4719	19.3061	18.0852	26.5583	22.9743	24.6985	20.7101	25.835	22.0427	24.6161	24.8065	19.6744	23.2878	19.542	20.5095	21.4555	19.1849
19.6568	17.8263	25.4241	25.3999	22.5836	23.3607	19.21	23.4382	21.4403	18.8238	19.986	24.5238	23.6213	20.7427	19.3996	18.2975	19.5163	23.8153	22.8511	19.7601	20.5235	18.6773	18.3159	22.6984	20.8573	23.3302	21.2843	22.535	21.1702	23.1636	21.7868	19.7488	19.7423	21.7412	22.1832	21.2575	25.2354	23.3315	22.0842	21.7222	22.832	21.7226	26.9778	22.8595	19.8734	17.7134	20.0718	21.041	20.9144	18.8085
25.697	26.2666	27.8452	28.523	21.288	28.4585	26.635	21.9181	27.0987	25.2881	23.7744	20.0012	28.473	23.8735	29.1075	25.7535	26.9916	29.5984	29.1716	28.6779	28.9454	26.2575	21.1304	28.1581	23.7218	26.7767	24.2116	23.0654	20.8305	27.7125	26.3907	25.1061	27.1357	21.5986	24.6207	28.343	26.398	27.044	26.7498	22.9707	28.6074	26.0546	24.6071	26.4505	24.8669	25.5684	19.1466	20.5504	20.3455	24.3665
25.9274	19.1161	24.4106	18.594	22.3807	25.6409	26.2791	25.0154	25.8127	25.9171	19.8956	23.9722	20.5884	25.6759	25.8519	22.4297	24.222	23.6587	24.8056	25.0307	21.0435	22.3465	23.5514	25.8764	25.2041	24.8611	20.0777	24.5984	21.6072	25.4332	19.8368	22.1461	26.4973	24.1312	21.2468	23.4604	24.322	20.0238	24.4738	25.4975	25.2472	25.4702	19.6635	23.9689	24.004	18.9631	20.0633	22.8521	21.6398	20.1964
24.0608	17.3919	23.8373	24.6843	20.6515	25.5741	25.4509	19.992	26.4074	17.9195	24.5922	20.5713	23.9503	20.3428	25.4926	23.9381	25.3396	25.411	24.2893	23.7343	24.8253	21.2289	17.4931	25.2359	20.528	24.6844	24.1662	22.7099	22.6786	27.8496	19.7928	19.1665	19.3904	21.1006	20.2069	25.5375	26.625	21.5816	24.5567	25.1075	25.9989	24.1751	25.2366	26.1184	19.9601	18.5376	21.8431	22.6776	19.7825	19.0362
26.5902	18.4042	24.3291	21.2973	23.856	25.4441	27.4046	20.3504	23.966	26.1444	20.6303	24.6554	17.6699	20.7024	27.0113	23.4555	25.1295	23.7752	24.6143	26.1515	24.0191	19.8214	22.8449	25.4795	24.4761	24.9926	21.7281	26.3141	22.4927	24.2922	23.7203	24.6255	26.6857	22.4706	21.3779	23.4026	24.5516	23.6651	25.7939	24.0055	25.6465	25.4618	23.4747	24.6615	20.9601	23.8752	20.9971	20.8399	20.1662	19.7075
26.1808	25.3913	27.5345	28.1263	25.4959	27.3569	27.9946	25.0934	21.6378	28.3331	25.3637	23.0888	24.8438	26.5414	26.9212	27.9879	27.6188	28.3563	27.4379	27.8789	27.2744	28.2717	21.5401	27.3292	24.6986	27.1186	23.3606	26.5399	25.3179	25.6044	27.6672	24.1957	23.6079	20.3011	28.2925	28.2402	24.1831	26.8993	27.6785	23.5303	27.1531	27.8003	24.9337	26.891	20.1307	20.4793	28.0748	21.8878	25.2041	17.3928
24.6068	18.0983	22.6421	20.5418	24.1158	25.9125	27.1714	24.2334	23.0555	26.0039	19.3304	20.9239	20.0965	24.9162	27.8566	22.2929	24.303	22.8849	25.5682	26.7598	18.4114	20.5683	17.2739	26.9248	25.6404	23.1307	20.9988	20.0683	20.9284	19.3679	18.3031	21.5756	24.613	24.7473	22.5281	23.3104	19.6987	22.3736	22.5927	23.4472	22.9045	24.2927	21.7748	21.9287	20.2677	16.4992	19.4081	19.6458	20.0851	19.6168
29.2303	23.4938	29.8379	28.7365	23.4132	31.0968	31.7827	25.6597	28.4433	30.3873	25.6379	24.2627	27.9613	26.2387	30.5876	29.1936	29.1431	29.2426	29.8829	31.0655	28.6254	27.8121	25.3176	30.3223	26.5234	30.4382	25.886	27.4746	25.4356	30.2771	29.1515	28.2308	28.8371	23.4788	28.5588	29.6019	25.8524	29.0441	29.5939	26.5525	28.8174	28.6056	23.7988	28.6024	25.9815	25.569	21.5863	23.7664	22.2611	23.6421
24.7737	18.734	22.2944	21.5538	21.9229	24.6602	25.3265	23.1703	19.7306	25.1989	22.911	20.7028	19.9639	23.9657	24.6464	19.8248	23.9895	23.3002	24.3184	25.0176	21.3062	24.47	19.0416	23.7946	21.1219	18.16	20.8467	20.5947	20.9974	21.109	18.7545	20.0359	23.3576	21.5334	22.019	24.4504	21.0145	23.8568	23.085	20.3973	23.0345	22.8495	21.2643	23.5355	19.851	18.2478	19.3085	23.4295	19.5636	19.8497
24.0964	18.7954	24.8883	20.9254	23.2874	25.6071	26.3724	20.4607	24.3388	24.8595	18.1379	22.8351	17.6237	23.8446	26.03	22.0943	24.0654	24.5421	25.6895	26.1955	23.7512	22.6651	18.1286	26.3967	23.2537	24.5843	20.5841	23.5241	21.0414	23.5878	21.2713	19.2836	23.7397	23.8593	22.2086	23.9354	22.8896	23.172	23.7897	23.4094	25.3313	22.756	21.3888	19.1492	20.7897	19.5483	20.0219	20.5612	20.462	19.1905
21.7536	23.136	23.3527	21.9189	24.0617	23.6721	21.9652	20.4156	24.679	24.1446	19.2436	22.681	19.5928	22.1267	26.1205	23.9274	26.4104	24.4987	24.3364	25.6976	23.8274	23.9955	21.9444	25.8002	23.058	25.0708	20.7752	25.3825	21.751	20.9136	19.0391	20.2547	24.5473	21.9135	22.5044	23.6421	23.882	19.7846	22.7586	22.4532	25.7727	23.8998	22.482	19.4343	21.4676	17.8948	20.4145	24.7548	21.2893	18.9019
26.0545	17.4135	23.2472	23.1107	20.2832	27.0935	28.7723	21.6674	23.724	25.2478	19.4886	20.7631	20.7848	20.5374	28.9196	23.9564	26.0719	25.3282	25.505	27.3533	24.4259	24.7734	17.4996	28.227	20.8695	26.6087	20.838	21.0376	21.5855	22.525	20.2379	18.3642	24.0259	20.9957	20.696	26.0174	21.0632	25.6371	24.5151	19.951	25.1524	23.811	24.3665	24.2826	19.2087	17.7738	20.272	20.3783	21.1143	18.9772
24.6771	21.0896	27.2137	24.1697	24.2571	20.4993	23.4233	24.952	24.9464	23.0218	19.5465	22.0056	22.761	24.5691	23.4194	24.0878	19.8662	20.0548	21.1651	21.4456	22.4944	22.5158	23.0306	21.4792	24.052	23.9705	24.3753	26.0937	21.4707	18.8096	23.7315	25.0626	24.2625	21.5676	23.5662	18.3471	25.0817	26.4522	26.3177	25.2554	19.4143	26.1657	25.2766	24.0432	24.5811	18.0724	26.951	26.352	25.0344	25.5944
22.7457	22.437	22.4419	22.9034	23.9569	21.4266	24.5104	22.2395	24.9556	24.23	24.6302	24.8705	17.4586	24.1825	18.2058	25.9726	19.5649	22.8507	17.766	22.1031	19.6461	22.7879	23.6193	21.4554	24.2996	18.4026	24.4939	24.2063	25.665	20.1195	24.5301	22.603	22.7716	21.0361	20.8489	20.494	23.3123	22.1291	24.3923	25.1518	23.0558	26.08	20.9813	21.7183	25.258	21.5284	23.8257	20.7648	23.1317	22.9537
18.227	18.7776	22.6246	20.7251	20.7354	19.3844	22.123	20.728	20.0642	18.2835	20.2467	22.5349	19.9068	21.1375	17.1284	18.3324	19.5722	18.9948	18.3946	19.3902	18.2727	18.1447	21.7423	17.5216	21.1393	17.4423	20.44	23.4783	20.2647	18.7459	20.4323	21.6065	20.7977	20.5083	19.9394	18.0941	22.7262	19.3454	24.5306	24.5884	21.5798	22.2971	20.5496	20.0067	20.9384	21.4888	22.4937	22.6559	24.3517	23.3419
22.9706	17.9526	22.6303	20.4328	20.3544	18.3652	22.9605	23.1441	20.1167	22.7533	23.2909	20.3314	18.4179	20.6171	21.8382	23.7075	21.3165	20.7149	20.0593	20.9393	21.0974	18.0205	21.2276	21.3774	21.3315	21.9006	21.9441	23.8346	21.0527	20.9041	23.652	22.8231	22.2789	22.2755	18.959	18.4245	23.4526	18.4369	23.1614	23.2291	20.0512	23.1571	21.4341	21.4113	22.8283	21.3893	19.7303	23.2516	21.0481	18.6208
23.8053	26.0724	23.6577	24.3168	20.995	21.1953	24.725	25.7385	26.0819	26.5624	25.7325	24.7321	21.4504	22.6189	22.6607	27.5168	23.2561	22.7449	22.6781	23.4974	21.3407	24.0961	26.5852	22.9173	22.2801	22.5225	24.1866	24.1925	24.0535	22.3386	25.8409	26.184	25.9278	20.9308	23.2541	23.8391	22.146	24.9981	25.4236	24.7457	24.1438	26.0626	21.7044	23.6118	25.8134	21.3729	25.6327	23.9031	21.2573	22.8798
19.6148	18.2914	18.2384	19.2155	20.1837	19.861	21.7489	21.1756	22.3062	19.0885	18.8515	19.6518	21.0948	20.5982	19.7236	20.2549	18.8131	18.3538	19.2075	18.7266	17.7034	19.2598	17.3008	18.8472	20.8058	17.94	20.8944	20.919	23.0433	18.4638	20.9672	20.0769	20.274	20.9692	20.4976	20.0794	20.1333	20.5508	20.4187	20.6889	19.1144	21.4627	20.9037	19.9757	21.5698	21.7009	21.4044	21.2527	21.2186	19.3009
19.3536	18.1501	20.1737	19.5224	20.1508	17.9148	19.1527	21.1496	20.2998	20.2301	22.2558	20.8503	18.9803	21.1036	18.0833	22.3092	19.9492	17.3829	19.1278	18.7234	18.0428	17.818	18.642	18.542	20.5792	16.7624	20.3275	20.4121	22.2536	19.8483	19.4308	20.5956	20.6862	20.7428	19.6878	18.1298	19.3307	19.0132	18.0823	21.1379	19.1609	18.5412	21.7622	19.0679	19.009	18.3674	19.6969	20.7416	20.869	19.2329
22.1724	18.4341	20.7026	20.4233	20.9845	20.6378	20.924	22.7429	19.3753	20.4438	19.1873	20.4701	19.151	24.2262	21.2391	20.2809	18.8802	20.2275	20.772	20.7378	18.4551	19.3983	18.9942	20.0996	21.1759	20.926	20.7329	21.2177	21.4162	17.6005	21.2099	20.8257	17.4126	21.6516	20.398	18.8748	21.2234	19.1182	20.5172	22.5693	19.3687	19.6058	21.2866	17.7942	19.6671	16.7203	19.8908	20.4265	20.1564	19.2667
20.8217	16.6999	22.1026	19.1993	20.1867	21.8048	19.8947	19.8715	20.5976	20.7572	19.3456	20.2429	18.323	20.8043	21.8902	19.7976	21.9692	20.6846	21.4975	21.3608	18.6834	18.9622	18.4852	21.2114	23.9279	20.4008	21.0399	21.4754	20.435	20.3669	19.6467	19.9573	20.2235	22.2399	19.7113	20.0356	20.6557	19.5113	20.7872	19.862	22.0402	19.0974	20.7233	19.9899	19.8347	19.8668	19.104	20.8005	20.0057	19.6452
26.3873	22.9294	25.8795	23.5954	25.3736	25.7363	26.5677	24.5966	26.0815	26.6984	24.2332	25.7843	23.3809	25.4578	25.8898	25.0773	25.5533	24.7368	26.2772	26.2107	26.2536	25.0235	24.1352	26.2228	26.0725	25.0443	24.3329	24.9838	23.9027	25.5275	25.3438	25.3441	25.9404	23.3337	23.8736	23.6784	25.7924	24.2904	26.5868	26.1688	26.3313	25.7201	24.0238	24.4143	24.666	23.9559	21.5509	24.4653	24.0728	23.8753
20.555	18.4947	22.3328	18.6325	23.9537	21.8371	17.0516	20.248	21.8348	19.0096	20.523	22.9405	21.1269	22.414	18.7076	18.8633	20.5108	21.6836	22.144	18.2188	22.995	18.6033	17.9658	22.1637	22.0953	21.968	21.1358	23.3778	21.7883	22.8872	22.7509	19.5336	19.2039	20.9203	20.4222	18.5302	23.2259	19.5898	20.607	19.7359	22.9078	20.2859	20.7845	20.2362	20.0188	19.2297	19.4007	19.7955	19.864	18.942
23.3874	18.9608	23.0311	20.9152	21.0861	22.4522	23.6192	20.7043	23.2175	23.5028	21.6961	23.4328	21.9343	22.3725	23.0842	25.7694	22.3703	22.1527	22.5062	21.5933	20.3079	23.5782	18.4252	23.58	24.2314	21.399	23.8189	21.7151	21.9829	22.264	24.7314	18.8073	19.8899	21.7338	19.5401	19.6541	22.1949	22.9528	23.3981	24.8474	22.6956	25.2845	20.7105	24.1453	18.5806	17.4481	20.8919	23.0357	20.1216	19.9029
23.6876	19.936	23.402	24.8862	20.7849	24.6856	24.5758	20.5555	23.233	23.9792	18.498	19.9636	18.424	21.76	24.4701	23.2403	23.4222	24.5771	24.1758	23.1478	21.6085	19.7883	22.3021	24.0195	21.4981	23.33	20.7606	20.6533	21.0691	24.2991	20.7941	22.3508	23.2033	21.014	18.8307	25.27	24.129	21.6477	23.1396	21.762	19.1273	21.7188	21.2149	24.2885	19.9457	23.1999	18.9583	20.2426	21.207	18.8493
24.1409	27.0026	26.2586	27.3552	21.1075	26.3862	26.5763	20.523	26.1714	25.6077	26.2724	22.7753	28.0255	21.141	26.371	25.1135	27.0586	27.4606	26.1037	26.0566	28.7967	26.8785	25.9406	26.3922	21.1826	26.9022	20.9416	25.5922	24.2004	28.3196	26.6821	24.9218	27.0056	26.2531	24.1286	27.4672	25.139	23.7872	26.9039	23.6808	26.866	25.3962	23.3881	26.8123	27.341	26.4637	20.3152	19.7159	20.3675	24.9851
19.2077	20.949	29.2364	27.9489	21.0985	26.4784	25.2762	21.2907	24.3239	23.3517	19.6652	20.9901	28.1654	24.4166	28.3637	23.0938	27.2166	26.5373	29.8278	23.3594	28.1665	25.0821	19.5706	27.2011	26.2898	27.6123	20.7206	28.3377	21.5931	23.082	28.0619	19.5904	27.4381	20.9137	19.7697	22.9535	26.0956	26.8922	26.3563	20.1046	26.6931	26.3925	29.1446	22.6219	23.8607	18.953	19.239	22.0526	20.7914	18.7799
20.2247	19.6986	17.8135	21.9478	20.9444	17.5807	22.7807	21.1995	20.6129	20.0215	20.2414	21.0037	19.9994	21.322	22.0665	22.7217	20.0882	19.5677	19.5371	19.7804	17.345	19.7966	21.8681	17.6251	21.272	21.6339	21.2459	21.0599	23.1869	20.1877	20.0352	23.9356	19.3066	23.5864	22.6524	21.7736	21.1631	23.0897	18.2191	22.4364	19.436	20.4091	21.2245	22.2387	22.8857	25.1739	26.0321	20.5839	20.6714	20.9821
25.0201	25.9867	22.9173	23.2942	19.8461	23.4525	26.1218	20.0645	24.4595	24.7027	18.2347	19.7523	22.9971	20.0759	25.1165	23.917	23.9066	23.0012	21.5359	22.5121	24.6571	22.0082	25.1064	26.5136	20.0475	25.058	20.2055	19.6328	20.317	23.1023	22.3422	25.1254	24.6696	21.6367	25.4772	25.6913	21.7063	24.4521	25.9287	20.5004	23.9464	24.8279	20.9386	23.7467	24.8941	26.7273	28.9229	19.1116	19.1636	25.3271
21.3539	20.8148	21.9829	22.2607	19.9663	19.2924	21.8778	22.1461	22.6386	18.1131	18.4543	19.8892	20.0224	21.8431	21.7947	22.0073	20.6121	17.6312	21.8459	17.9176	22.6972	17.8951	19.2722	21.6232	23.4293	21.9997	20.4992	22.92	22.1331	18.3529	23.3366	23.1241	21.749	20.4952	20.5334	21.0778	23.7466	22.8546	22.6107	24.1457	22.3967	22.4105	23.1331	22.2968	19.9135	21.9603	17.7127	24.0812	20.3953	20.3066
22.32	20.7939	22.3869	22.7116	23.0829	21.9255	21.2173	20.1888	25.1807	22.1669	21.4147	23.379	23.0497	23.0935	23.202	21.5163	22.3909	23.3172	21.4735	21.3938	24.6782	22.5182	22.8902	21.4646	20.1816	22.724	22.6276	21.7297	24.2007	22.3688	21.7773	21.7735	21.6854	20.6202	18.8348	21.1056	22.8623	22.1434	23.5299	23.0272	24.4863	21.7656	22.1848	21.8382	20.9654	21.3297	19.6328	21.5306	21.905	19.3025
18.5691	16.9503	20.2875	20.2556	22.1233	17.2978	19.3507	23.5543	21.5089	23.0908	18.9587	23.0131	17.8937	22.5456	17.9544	19.7074	21.2915	17.8432	17.5833	18.1215	20.962	18.1033	21.4837	20.6049	20.4894	19.2552	19.996	22.7986	20.4582	18.5537	20.883	20.8048	22.0257	20.9071	19.0208	20.1198	19.792	19.1866	21.469	21.7305	17.4546	22.1618	20.7201	20.8106	17.8216	19.7379	19.3038	20.3142	20.1842	16.9732
20.6796	17.1874	22.0761	23.3342	20.2424	21.8047	20.8946	20.4741	21.9992	22.4838	18.0944	20.2038	18.1242	20.2123	21.0686	17.6591	21.9654	22.95	22.5418	23.146	22.5174	21.6061	17.1454	20.6038	22.7603	20.5265	20.5589	19.789	20.7826	19.0149	22.3531	20.6759	21.3219	20.4154	19.4477	23.1208	19.9421	20.2333	21.7164	19.0963	22.7861	22.3686	21.1036	19.977	19.5304	18.6216	19.8812	20.1082	21.5305	18.8759
18.7503	17.7318	20.1693	18.3194	19.7693	20.0701	20.5373	21.3264	21.5509	18.322	19.0612	19.6648	18.6535	22.2515	19.6523	20.4211	18.3442	18.3299	17.7972	18.5898	18.7123	18.5812	17.3782	19.8909	19.9619	19.4356	20.6881	20.1477	20.2268	20.7041	18.1809	18.9462	17.2172	20.9654	18.7161	18.2074	20.2867	17.0117	19.926	20.2432	22.5025	20.5255	21.7998	18.0432	19.2376	16.0319	20.9295	20.4698	20.5546	18.5498
19.1665	19.8026	21.3468	18.5314	24.096	20.0499	17.2018	19.9852	22.6577	22.5067	19.2832	20.2677	17.7465	20.5255	21.4346	17.8833	21.2385	22.8751	18.2883	22.2666	19.9698	17.7622	17.9128	19.4618	20.5519	17.607	21.1885	19.533	20.8484	18.2246	18.3839	19.1356	17.4459	21.0917	19.5345	18.4167	21.3373	17.2497	17.9369	21.2933	22.6335	22.7672	20.784	19.6228	19.7514	18.1473	19.4	21.1264	21.227	19.122
18.4534	16.7989	21.9566	19.018	20.2985	22.1185	18.1691	21.2015	23.274	18.8017	20.1428	20.4062	18.761	19.9888	22.5444	18.3982	18.5351	17.4958	17.4467	17.7874	19.9246	18.6783	21.6001	21.591	20.6874	19.9187	20.6265	22.9866	20.9912	20.6089	18.85	19.5703	20.0898	21.5806	19.7224	18.8974	23.3784	17.7964	21.4053	20.0467	22.2125	19.5599	21.9421	19.3521	20.6844	20.319	19.6486	20.1684	20.2459	20.1608
19.251	17.8424	19.4356	18.1841	20.42	17.5161	22.7887	21.1238	22.538	17.9797	19.1774	20.9423	18.994	20.5892	21.1804	21.5042	18.9735	18.4288	18.3881	18.6849	20.2128	18.8887	16.9967	21.5092	21.2119	21.4555	20.7645	22.0885	21.2661	19.1086	20.9714	18.8253	17.9711	21.0315	20.45	18.0737	23.7427	20.0652	22.1141	21.0698	19.0731	17.5897	22.7326	19.8272	19.3232	20.9814	19.8082	22.6817	20.4054	18.6452
19.7918	19.0097	17.7523	19.3311	20.3621	18.0175	20.0325	20.6576	20.0606	19.9009	20.6416	24.0545	18.8829	21.5605	17.6738	20.7194	18.2222	18.6431	18.6042	19.6889	17.0362	19.5961	21.2985	17.3215	22.9948	19.343	22.2836	20.2206	20.9232	20.0976	18.0513	19.85	20.8513	21.8644	19.8334	19.2066	20.3567	17.9075	20.4079	23.2553	18.7958	21.5522	20.9491	19.4313	19.6865	18.4209	18.7834	22.9957	23.4008	19.3893
23.6495	17.9678	22.6101	21.5088	23.096	22.1226	22.2913	22.1447	22.6835	23.584	19.4778	23.2019	19.1316	25.1405	21.8312	22.8864	21.1671	19.4726	22.1297	23.2754	20.0614	18.7884	22.0714	22.7162	21.6978	21.2753	23.3058	21.9985	21.0755	19.9079	22.9419	22.4073	23.2396	24.6511	21.5357	21.7232	20.5084	18.1481	22.1103	22.7911	23.3537	22.6883	21.0551	22.0911	18.694	19.5758	23.0408	20.4241	23.5667	19.0496
23.3092	18.2236	21.3876	20.1604	23.0418	22.2434	17.437	21.1438	21.6126	19.1103	18.9161	20.488	20.4194	21.2608	21.3125	23.2476	22.4358	18.541	19.4412	18.7928	20.4954	19.013	18.2567	20.972	23.6944	22.2107	20.8014	20.3785	21.8645	19.2149	18.9446	23.6434	20.0542	21.2023	20.8722	20.0258	21.0957	19.0798	20.9501	21.0178	22.5895	24.3079	20.3145	19.6358	18.7745	17.8908	20.3116	19.7256	19.7924	17.9445
25.9597	24.5647	26.6063	27.9799	20.4918	26.8721	28.6089	21.9962	24.3892	27.3551	20.8963	21.2533	25.7724	17.0059	26.7687	27.8495	27.132	27.2348	26.8641	27.1738	27.0756	24.5268	19.356	26.9786	20.6228	26.7772	25.8855	22.3594	26.9591	25.3463	28.6061	25.984	24.6035	24.2816	26.2304	27.3988	25.5019	27.903	28.0714	27.0266	27.1331	26.6489	26.9869	28.4755	20.1939	21.0526	28.5033	20.7394	24.1366	19.5485
22.4065	18.292	22.0303	20.6627	22.8232	20.1444	20.9302	22.2198	19.7951	19.1578	21.5543	23.535	18.6088	22.2042	21.6562	23.0981	22.3111	20.0878	21.45	20.9313	20.5928	20.1758	18.1446	21.6473	23.2699	22.0479	23.2874	22.5721	23.2111	20.5536	22.5862	20.7325	21.2485	23.469	22.3107	19.3317	23.1072	21.556	22.285	21.8688	20.3428	22.9489	21.3894	21.3058	19.2709	18.3405	19.3412	20.7812	23.3534	19.6146
21.6368	24.6497	22.7831	20.6417	20.5265	18.1193	23.3105	20.7318	21.5816	19.9277	18.5734	20.1773	18.2341	24.7771	21.7166	18.7294	22.9107	19.9539	18.732	20.1519	21.0428	18.5409	22.0893	23.3558	21.5162	21.9659	20.5283	23.3797	20.8147	18.976	23.5079	19.7588	17.0712	22.7512	19.4901	19.3921	22.21	21.0197	22.4936	21.6171	20.1662	21.8885	24.1416	23.3665	21.9854	17.2115	23.4731	23.3033	20.8307	18.5869
22.1697	17.7857	19.2696	19.5188	22.7207	18.34	21.1074	23.1824	21.3446	21.8606	18.8117	21.8623	18.2492	24.5702	17.8904	22.3679	19.0625	21.2887	19.9268	19.0716	16.884	18.6286	21.7089	17.5558	22.0195	17.5415	23.8968	21.6294	20.5256	19.0606	22.0286	22.8736	21.9302	20.9355	19.1095	18.8568	21.4365	18.2903	22.4538	21.6001	18.8769	22.9337	20.745	22.2794	20.4048	19.3165	21.0279	22.4644	20.8735	20.2583
24.6625	23.8105	23.5608	24.056	24.72	23.1238	25.0981	24.7645	23.1313	24.2706	23.3502	24.5711	22.0385	25.5449	24.7015	23.5513	22.8106	22.0203	23.0123	23.7293	22.5981	22.3178	17.8676	24.4406	26.5987	22.8789	20.5127	20.5169	21.5228	22.5354	24.5174	24.5315	23.7346	23.8247	23.517	22.9556	20.0137	21.8678	25.0818	25.9055	23.9083	26.037	20.3886	20.1813	19.5898	19.6842	23.8047	24.5006	20.0299	24.0758
19.5424	17.7569	21.7473	18.8762	20.0237	19.4619	21.2595	22.2384	21.088	21.1775	19.1761	20.2183	18.433	20.5566	19.5551	20.1159	20.8438	18.1881	17.8992	18.4533	21.0489	20.0634	17.4893	21.654	20.2543	20.0111	21.4098	20.1174	20.6475	20.0676	21.4319	19.6134	21.6336	21.7969	19.2699	19.5711	20.0235	18.6852	22.149	20.6885	20.8757	21.761	21.3031	19.3829	20.5354	17.5197	19.6995	20.356	20.438	19.9949
24.8016	21.6375	24.7754	24.4188	24.3557	22.4654	22.1081	22.504	26.4647	24.7195	22.9712	24.1077	25.6619	24.9379	21.9458	24.6428	23.8617	24.7344	24.419	23.2461	25.0655	24.3412	25.321	24.8935	24.5682	23.7977	25.3418	25.3566	23.2886	24.0663	25.7284	24.7908	23.4296	23.9229	24.9231	23.9025	26.141	25.1654	26.5926	25.507	24.6596	25.8931	23.2703	25.0401	25.4239	25.8154	27.1386	24.0808	26.1557	27.3438
20.5549	19.2804	19.4576	19.7	21.1355	18.5334	18.0869	20.3909	18.496	18.9679	18.8601	20.9218	18.8815	20.2774	18.6033	21.0671	19.3695	19.0121	17.9132	19.246	19.6477	18.3821	17.5045	18.2031	20.3996	18.1533	20.4788	20.1833	21.6645	20.4451	19.3296	19.2259	18.1988	20.7876	19.6317	18.9196	20.1863	17.7503	19.2975	22.051	21.2624	21.9064	21.6886	20.7705	20.1813	17.2348	20.1816	23.1705	20.7473	19.6006
19.5947	18.9743	20.0319	19.0404	21.1065	20.1554	18.3246	20.8739	20.9017	19.9517	18.9249	21.1793	18.55	21.0595	21.0025	21.5919	20.436	18.3524	18.1451	19.5192	18.8855	18.7872	17.757	19.8881	20.7073	19.8328	20.3769	22.0743	20.9223	18.8228	19.266	19.2382	18.4455	21.0307	19.3642	19.9946	20.7697	17.8506	20.7852	21.4787	19.6453	19.0039	21.4243	19.678	20.3406	17.8916	20.7621	20.658	21.1196	18.587
21.8832	18.8317	21.8334	20.1288	20.0315	21.1089	20.0027	20.4872	21.6183	20.8297	19.5531	20.0728	22.2316	20.2863	21.8296	18.928	21.6858	19.441	21.6139	21.2014	20.3035	18.4878	18.662	23.1388	20.9207	18.3771	20.6257	20.7071	20.7191	21.0897	20.9058	19.4436	20.0117	20.851	19.4191	20.3881	22.471	17.3633	17.7979	20.069	22.5272	21.6752	20.745	20.4311	19.2709	18.2208	20.3641	21.0215	20.8644	19.1926
23.1698	19.4199	22.446	20.21	22.8501	20.6117	19.2451	24.3421	21.8814	21.9382	19.5833	20.3394	18.618	23.0876	18.8369	21.9084	22.4339	19.8394	20.0304	18.6113	19.713	22.5611	20.7342	21.6251	22.0074	20.4009	22.2424	22.9937	20.7608	19.2136	18.8106	22.447	23.6772	22.6482	21.5834	18.6972	22.4878	22.7083	23.3391	21.0765	19.7016	23.7527	21.741	23.3647	21.5704	24.0316	19.3413	23.3472	23.1149	25.9728
23.0032	17.505	24.2976	24.9857	22.5254	21.7241	23.1417	24.5904	24.3873	24.7034	23.7947	25.9541	26.6783	24.5174	21.4415	24.0825	21.9417	25.6178	20.1431	22.2659	26.4869	25.3784	24.0058	23.4407	24.8279	23.7976	20.4418	25.6234	24.5584	18.9247	25.8253	24.9766	23.3434	20.8879	25.479	19.1045	24.5182	23.3303	26.2803	24.1102	23.7429	24.7186	25.1145	22.3727	24.0266	22.6753	25.584	20.7723	24.6787	26.2225
21.6149	17.9663	21.107	20.5272	20.1619	18.8994	19.1992	21.1252	21.7935	20.4021	19.3391	20.1423	19.2771	20.4343	21.1198	19.5581	19.4246	18.1272	19.4576	19.6585	18.385	18.5492	17.9374	19.0062	20.5035	19.1743	20.4795	22.0202	21.1647	18.984	20.9915	20.7168	18.3676	21.2452	19.9508	18.8034	20.3026	17.3789	21.0949	20.8301	18.8273	19.0768	21.1509	19.1542	19.8148	18.7519	19.9524	20.1316	20.2083	19.4879
21.5824	17.6253	21.8968	18.8153	20.6293	20.6847	18.2113	21.3588	21.3833	21.7455	20.2195	20.1827	19.3088	23.4295	20.0468	18.3547	20.8792	20.6026	18.9765	20.4903	20.0674	22.4539	22.8692	20.3378	21.1919	19.2437	22.6921	22.7561	21.1841	19.5583	20.8146	21.9997	19.3895	21.2624	20.7769	18.8652	21.0733	19.8818	24.4442	23.4459	21.346	24.7158	21.3488	20.334	20.6107	21.6542	20.2504	26.1314	24.9413	23.8561
25.2051	19.456	26.1805	25.234	23.0483	23.6261	26.9526	24.7219	24.9885	25.5051	24.6673	24.3471	23.6057	23.791	22.9778	26.2916	25.0676	24.5457	23.4198	24.873	20.6216	23.8579	26.4773	23.9272	25.3899	24.1552	26.3725	26.6644	21.5492	22.7549	24.7346	24.0008	27.2341	24.3547	24.8391	23.4939	24.5275	25.9983	28.7941	23.9644	25.5841	28.0599	27.5395	25.2215	26.7716	28.5717	27.9178	25.96	26.7506	28.6137
27.1783	24.5579	26.4193	27.3645	23.7102	25.3582	26.0469	25.9071	27.4267	27.5785	26.6672	26.1692	27.8673	25.9842	24.9013	27.3361	24.3832	27.8546	26.1833	25.4527	27.2116	26.6354	27.7372	26.5677	24.4445	26.8116	23.6737	28.3589	27.4973	26.6334	27.4847	27.3463	26.9077	23.7192	27.7428	25.3136	28.0324	26.7961	29.2256	26.1485	26.8854	27.8492	27.4303	27.1534	27.982	27.9363	27.1371	26.0311	26.894	29.6489
23.7368	18.3732	25.4345	24.6125	20.2551	24.7287	24.3418	20.3552	24.886	24.6502	24.1102	20.5933	25.2752	23.0431	23.7165	23.6647	24.6535	24.2847	24.5822	23.5963	26.0896	23.2014	23.3079	25.3925	23.585	25.2316	20.8452	24.4591	21.3319	23.8214	24.4219	23.1878	25.0808	21.6242	23.7724	24.6047	24.7595	24.1833	24.5643	19.903	24.8957	23.9807	20.8944	24.4379	24.5652	21.9537	20.6161	22.0949	23.8009	18.8099
19.1313	18.4058	25.3004	25.3388	20.8725	23.4725	22.4336	23.0655	21.292	19.2953	18.9703	20.441	25.986	20.54	23.9681	23.133	25.2926	24.745	25.4705	23.8698	26.4214	24.0414	19.133	23.6774	23.5699	23.7948	20.8628	19.8636	21.0271	26.3993	23.3508	20.1796	21.7852	23.6348	19.9764	23.6636	22.3793	23.6048	24.1005	19.7485	25.6498	23.6789	21.5756	25.3839	20.0801	19.3913	19.536	20.5144	20.6003	19.8502
18.8368	18.1423	18.5331	21.7458	20.1274	17.9751	21.7305	20.597	18.6844	23.9984	18.4026	20.2111	19.0526	22.0897	20.4903	18.4492	18.9364	18.5397	22.4035	22.7649	17.7756	22.0824	17.6901	21.9624	23.6594	23.2437	21.2332	21.3382	20.79	19.586	18.8962	20.5626	19.7232	22.5387	20.5149	19.4638	23.3843	24.2595	18.7562	22.0965	23.6589	21.9827	21.5916	23.3626	19.4712	17.8261	20.0049	24.0476	20.3526	18.4856
18.8486	19.0924	20.7103	19.2277	20.3613	18.0672	18.4651	21.0827	19.1167	22.1418	19.0261	20.6444	19.9764	21.2404	18.3457	17.9903	19.0169	21.2833	20.6462	21.3192	17.8761	18.8635	18.1431	18.4399	20.3611	21.1081	20.506	23.0847	21.2368	19.3627	18.4807	20.9186	18.5115	21.3089	22.6921	19.4926	21.0364	20.3181	18.9763	20.2831	20.2491	18.8632	21.9898	18.9415	22.149	21.9145	19.5966	20.7011	21.0259	22.8428
26.5875	26.2912	26.2252	26.0871	22.0235	25.57	26.1628	22.7364	26.9699	25.1676	26.7257	23.7153	26.3623	23.2459	26.2635	26.2842	25.7495	25.6798	25.4534	26.1529	27.2297	25.8945	26.9858	27.5619	22.9487	26.7115	20.9105	23.5805	23.193	23.9613	23.2384	25.9681	26.0642	24.1943	27.2535	27.3103	25.8234	28.3049	26.2187	23.6491	22.7916	25.1672	26.1981	23.0016	26.8044	26.2557	24.8031	23.8084	22.4232	25.4193
23.0085	17.7443	19.3428	18.9228	20.1884	17.6203	19.7792	20.4183	23.4471	18.7612	19.1658	22.6982	18.6656	21.4968	18.437	18.0049	18.6262	18.2347	18.3109	20.0418	17.3882	19.1444	22.3808	22.7999	20.622	22.1702	20.1754	24.9175	20.425	20.1677	18.494	19.3892	17.9268	20.5907	19.4576	19.2599	21.3554	21.5896	23.7323	20.571	19.9013	21.2298	23.5647	19.4319	21.6883	24.0406	20.8175	24.2249	23.315	23.6067
23.9012	24.3677	18.6567	19.5914	20.5677	17.6345	17.8692	20.8102	25.9033	18.4216	23.0938	20.2459	23.1203	20.6605	23.0005	18.2481	18.8457	22.9516	21.643	22.6242	25.2915	19.173	24.4376	25.081	20.4687	24.8477	20.5384	19.8737	20.8259	24.1111	19.5032	19.7576	22.4266	20.9454	20.0457	18.9085	20.4352	23.233	26.6821	20.9177	18.375	19.2122	20.6771	24.8622	19.4443	26.239	23.4115	20.2726	20.1427	25.0612
20.5475	18.4942	21.3595	19.6206	20.5842	17.8713	20.1946	20.8273	21.2842	20.8896	20.8865	20.3329	20.8515	20.4643	18.0078	22.4705	23.1493	20.8711	19.8113	21.7244	17.4038	18.9416	22.296	19.3566	20.852	22.5561	20.6197	23.7389	20.9157	19.6609	18.8715	19.4853	18.0232	21.0248	21.6107	22.4201	20.2193	17.6371	19.8283	20.6801	18.8775	19.346	21.1858	20.0743	22.4715	21.57	20.4311	20.9301	22.0995	20.9029
19.7497	17.1315	19.9873	19.385	20.4506	21.0723	18.533	20.6892	19.8686	18.4353	22.4397	20.1358	18.0699	20.5046	19.1625	19.1197	21.5968	21.4757	21.187	18.7915	20.2087	20.6587	22.7004	20.7639	20.8705	18.5094	20.4357	23.8855	20.7124	21.5244	21.008	19.5412	17.5551	20.845	18.977	19.5707	20.2636	18.5626	22.3674	22.6262	21.8847	24.6751	22.1281	22.8042	19.9555	18.0947	19.0231	20.2536	22.9373	22.7223
19.1857	21.834	24.3639	25.2123	20.9324	24.3367	25.4562	21.1871	21.1486	24.4244	25.418	20.6029	18.7242	20.8946	24.8835	26.56	19.5878	24.8006	24.0585	25.4041	25.5633	24.7464	25.5315	25.7601	22.4161	19.7465	20.8718	20.0432	22.3132	25.4006	24.0551	23.9092	24.771	26.1975	19.5048	18.3674	22.0044	26.1792	21.6581	20.0691	20.4838	22.7878	22.6425	20.5519	25.7184	25.6973	26.2344	20.0676	20.7347	19.2446
23.8277	23.3049	23.3187	22.246	20.2487	21.8344	23.668	20.4806	25.8297	24.9405	18.8496	23.0441	22.2083	20.9134	23.9999	22.1085	23.2605	18.2973	21.959	18.4982	24.1956	21.2205	24.364	24.1305	20.7215	24.1035	20.8432	23.0359	24.7949	25.2015	25.5363	23.6089	23.3133	21.2711	22.9262	23.5833	23.2277	24.2764	26.6085	24.1295	22.6773	20.4182	24.4091	19.8361	23.942	25.9712	23.5748	20.5473	22.8149	24.9877
20.1163	23.2448	21.2343	20.2344	20.6291	18.7201	17.9315	20.8736	23.7919	19.1257	19.5987	20.5723	18.8707	20.7617	18.2427	18.4219	20.8545	18.9035	18.0837	18.5584	21.193	19.7758	20.8033	20.954	21.2587	20.5774	20.5582	20.6504	21.194	23.7063	20.811	20.0826	17.57	21.2432	19.623	18.9616	20.6928	17.8216	18.8714	22.9949	22.0647	21.4195	20.9146	20.2245	19.1799	18.4994	19.2328	20.2916	20.6339	18.84
20.457	17.8045	20.4309	24.0277	19.938	23.368	25.5203	20.1595	21.1218	18.6618	19.5497	20.267	18.539	25.5292	22.6128	22.6248	18.9937	21.3578	20.7936	22.5798	23.6649	18.5922	19.3047	25.7822	20.4964	23.1704	20.6748	20.1643	21.1625	18.5064	22.9265	22.695	21.3008	20.9648	19.3554	22.479	20.7134	19.0442	25.1316	20.4341	19.1294	18.4113	21.7254	23.1984	23.9691	25.3584	24.5259	21.0562	20.3721	23.3826
23.2687	22.8154	21.8251	23.6079	20.2793	18.0406	22.1658	20.5122	23.32	25.5133	19.0601	20.3919	22.4375	21.3084	24.1425	21.4564	21.3658	22.0163	18.4999	22.051	22.847	19.2506	22.3311	23.3851	20.9204	24.2581	21.5324	25.6128	20.8477	19.0766	22.7008	21.2506	21.3004	22.7502	19.9894	21.6636	20.5466	22.5017	24.548	23.8297	19.5357	22.1498	20.5337	24.3175	24.7675	24.243	24.6802	23.8673	24.3172	24.0752
21.3243	17.9552	19.8126	19.0292	20.3557	20.707	21.6096	20.5912	22.0386	21.7566	19.2604	21.3106	19.325	20.5328	19.0846	19.5733	19.974	18.9326	18.1923	19.1415	20.727	21.7297	21.6648	22.9	20.15	19.1695	20.1465	23.7852	20.9765	23.3736	19.9138	20.1086	17.818	21.0787	19.9479	19.0947	23.2883	19.4917	20.853	20.6121	20.025	18.4871	20.673	22.5885	19.8616	24.4509	25.2723	22.7703	22.3919	20.0498
19.6272	20.2738	18.7164	22.2594	20.1827	23.0867	23.516	20.4124	22.6117	23.1497	21.7258	22.3727	19.2736	20.9642	22.6302	19.8517	20.3329	20.423	18.2554	21.4913	22.6904	18.0542	20.9657	23.8821	20.5305	21.7961	20.7028	24.9999	21.9236	19.2042	21.3143	21.7216	18.7071	21.9166	22.6266	23.0585	21.1481	17.5687	23.1277	20.2035	19.6896	21.9925	24.1495	22.9183	21.8015	23.1417	24.9222	19.9324	21.1552	23.089
24.1942	17.614	22.8703	24.6069	20.5927	23.2221	18.0307	22.929	21.9175	22.8565	20.7335	19.8259	18.7598	20.1802	25.1102	23.8418	18.7908	22.356	21.6694	22.4462	24.9935	18.6451	17.8083	24.6721	20.6157	25.0082	20.5502	20.9665	23.6092	20.5373	24.1704	22.4616	21.0563	20.5624	19.5335	22.6426	20.2947	23.3624	25.6127	20.8305	21.5397	23.6728	21.1072	24.7198	19.4982	26.2037	24.6525	20.0637	20.0042	18.2717
18.9931	20.0666	22.4142	20.7574	20.5658	19.1618	21.8813	22.514	22.1485	22.569	24.332	20.422	22.0653	20.5674	18.4106	22.4045	21.4878	18.697	18.8669	22.0832	22.3154	23.0416	22.095	18.327	20.4228	22.6381	21.0972	22.2339	23.5111	18.9152	19.8427	19.7848	17.9953	21.106	22.6659	23.5914	23.4866	20.2714	19.1063	22.6199	18.8274	21.8602	22.202	19.383	22.9092	23.2416	22.3494	20.4732	22.5359	22.1582
22.3099	20.4922	22.4203	23.7013	20.2979	22.8319	21.8225	20.836	22.166	21.5395	23.1329	20.2584	22.3649	20.6541	19.5227	19.9948	19.1623	23.6534	23.512	23.1101	22.9293	18.7774	22.6782	19.434	20.8799	21.2507	21.9611	21.2601	23.7618	19.6001	20.2954	22.4768	19.6474	20.9569	24.8327	24.5714	20.7694	18.032	22.2873	20.1854	19.3425	19.768	21.1946	19.8858	24.2713	22.9078	21.1104	20.5557	20.1387	23.9105
19.3458	18.4225	23.801	24.5246	20.4075	19.5723	23.0645	20.8083	23.0727	23.8516	24.9394	20.8444	18.97	20.4578	23.471	23.6488	18.8877	24.4984	24.5428	24.5795	24.0289	22.9383	23.2651	22.9237	20.8499	22.4625	21.5582	19.9983	20.9941	19.5552	21.8066	19.8982	22.1414	21.4914	24.7963	25.9962	22.5664	21.3592	20.3226	20.008	21.8628	19.8239	20.8935	20.131	20.5848	24.6229	19.8866	20.2717	20.558	24.7035
22.7272	23.8926	22.5375	21.2214	21.2137	20.8008	22.1463	20.5314	18.3758	21.7707	21.0105	21.3382	20.5158	20.9229	22.6013	22.9303	22.1952	22.2874	18.8964	19.1695	23.1392	19.9036	22.0654	22.9119	20.5512	22.4347	20.8502	22.1783	21.7988	23.0349	20.1476	23.3945	22.4117	21.9418	22.0896	21.5568	25.0329	23.5701	22.6853	23.1466	19.5938	23.3132	21.1765	22.4476	24.2654	23.7732	25.6044	20.5385	20.6425	23.7361
19.0851	18.3695	18.1873	22.9683	19.9108	21.0956	17.5493	20.6447	21.5146	22.2857	21.8443	20.5798	22.1567	20.8925	19.9298	21.5335	18.9441	20.0594	18.6586	21.2559	22.2201	19.9357	17.877	18.5798	20.6734	18.5732	20.8155	20.3023	21.9195	19.1076	18.6558	20.657	19.1698	23.4276	22.5209	18.7934	20.9819	17.6895	19.1691	20.4655	19.017	20.0682	20.5851	19.5681	22.2531	21.7013	20.0183	19.9808	20.3517	18.4795
20.3224	17.8412	21.8196	19.6996	20.4338	17.8086	17.5646	21.4778	22.7964	22.4132	18.3528	20.5427	21.1918	20.5885	22.6365	21.7885	22.3309	19.5466	20.2265	20.1393	22.1321	18.4779	21.4978	21.1483	22.4094	18.007	21.2881	21.2255	22.2086	19.2907	19.0508	19.5803	19.5135	21.25	23.4554	21.2909	23.3134	21.2768	21.8552	20.2216	19.9019	22.4971	20.9454	20.4318	23.8386	22.4496	19.5649	20.3206	20.625	22.9292
27.686	26.0475	29.152	29.3855	23.0129	29.4176	29.6745	27.1817	29.0903	28.9707	29.0072	27.0958	30.6075	28.7112	29.4893	28.8643	28.7682	30.1564	29.7382	28.7828	30.62	28.6211	28.9462	30.8463	25.0508	30.5488	22.7733	26.1308	25.5606	28.3495	29.3732	28.0363	28.3177	25.6871	29.1227	29.2265	25.3703	29.2655	29.9667	26.1262	28.2122	26.754	27.132	29.3157	29.1379	29.4505	25.1104	25.8497	27.1397	28.6553
26.4176	26.7328	26.2617	25.6872	21.5778	24.1373	24.8227	20.1313	23.3613	23.3486	25.5407	22.4371	26.5146	23.0471	25.2316	25.9609	24.2253	22.6	25.6153	24.823	24.6235	23.0176	26.5132	24.0324	21.5723	26.2836	22.4521	24.0138	24.8121	23.3105	22.8101	26.1128	23.6286	22.7823	26.1127	25.6403	24.0287	26.7287	24.5111	22.2162	23.5656	24.4612	23.8899	22.548	27.0551	25.9624	28.4899	22.5886	23.5253	25.0957
27.6939	28.9346	30.3763	29.6002	23.7541	28.4701	28.8286	25.6523	27.6291	28.5752	30.4169	25.795	29.2434	26.043	29.1282	29.8286	28.536	28.9835	29.4392	28.5443	29.4224	30.7701	30.843	28.1088	25.4549	29.65	23.919	27.145	24.7443	28.0498	27.2663	29.05	27.103	25.9854	27.4708	29.1094	27.8564	29.6805	29.3486	26.0742	29.4322	27.7587	29.4783	27.2037	28.3006	31.0852	33.4214	25.9637	26.1582	28.845
25.3018	23.6622	26.2338	24.5482	20.2903	25.1801	25.5491	22.8267	24.4424	25.7805	26.2643	23.4321	25.0911	20.7129	24.8765	24.4163	25.5232	25.6078	25.0545	25.4035	24.1457	24.916	26.8147	24.1458	23.7456	25.3523	22.3981	24.8168	25.3805	22.2718	23.7535	25.999	25.2232	24.1794	26.0175	26.0091	24.6899	27.1717	25.7275	22.5889	25.6137	25.3926	21.2302	24.7948	26.893	25.8094	29.6953	24.0483	25.4188	26.1674
25.5913	28.5461	28.1865	26.9859	20.8046	27.592	27.815	24.1507	25.5179	25.2718	29.0999	23.351	26.295	22.966	28.0076	28.3437	27.4342	28.501	26.6887	27.5884	28.3744	27.6267	27.3466	26.8365	20.1196	27.8115	24.0233	24.815	20.393	26.0288	24.8781	25.5546	27.4168	24.9735	25.2197	28.653	24.6908	28.1297	28.0149	22.5316	24.4599	26.6808	25.9799	25.4693	25.0787	30.4247	30.5509	21.7482	23.7397	26.8183
22.5696	18.0573	23.4997	22.4102	21.238	18.2335	17.8197	23.4986	21.9666	21.916	23.3606	21.0489	18.0176	21.866	21.8731	18.1837	23.3269	18.3411	21.3048	21.6739	17.6623	19.8553	23.7482	20.2835	20.7028	21.9754	21.0463	23.036	21.0074	22.533	18.7588	23.9389	20.9181	21.2162	22.4966	19.5073	19.9067	17.7598	21.6298	24.1194	18.9915	24.7893	21.4761	22.0228	22.1246	18.8277	19.9909	20.5892	22.7511	23.956
27.4084	25.9393	27.0631	26.6784	25.8749	27.1203	26.7907	20.8067	27.9737	26.7075	27.0986	27.6794	27.0179	24.0966	27.3929	27.2666	28.181	27.5248	26.8531	26.0907	27.6768	25.7058	29.0687	26.772	25.5442	26.99	21.8331	28.5215	24.0141	27.8884	28.6273	28.2106	27.0881	25.7546	27.6362	27.0309	26.884	28.1457	28.5956	26.6658	25.637	28.7631	27.4545	28.6634	27.96	30.6625	28.467	28.1142	27.4788	30.0652
27.5818	29.6481	29.6455	30.5298	27.4887	28.5166	31.0939	25.8393	28.7136	29.8642	30.8438	27.7913	28.7144	26.6316	30.6367	30.6709	28.3052	28.8058	30.1445	30.512	30.7425	30.2514	30.4615	32.0465	27.7712	31.2647	25.1221	25.2143	25.491	28.0119	28.4991	30.4312	29.968	27.2506	28.7688	29.8378	26.2866	31.5259	29.3367	25.2371	27.6846	27.9322	24.0385	27.4078	29.0476	31.9522	31.4219	25.1685	26.904	29.0548
20.1666	20.3233	24.5967	26.4467	20.5724	24.6566	26.8078	21.826	21.8943	25.5892	27.0211	21.8508	26.4264	21.6275	26.3647	25.6579	26.3743	25.4843	25.0763	26.8221	26.2467	23.6705	25.7651	27.2874	23.2528	26.883	21.0696	21.9196	24.4519	26.5822	25.4541	23.6787	24.6579	21.6779	27.4437	26.0438	22.9499	27.7581	25.3738	20.624	18.7412	24.3283	21.4812	27.6412	22.2076	24.8627	24.9423	20.8212	20.0538	24.8249
21.7918	19.6471	23.4308	20.8907	24.3211	17.9194	18.7341	21.3086	23.7974	22.2107	23.7209	23.3043	22.5871	23.042	22.3081	21.0874	19.6957	22.1616	21.4392	19.7683	20.8407	23.991	21.8859	19.8886	20.5428	21.7273	21.3529	23.26	20.8388	20.6376	18.8187	20.1792	19.5997	21.4417	21.3952	19.4606	23.3146	21.151	21.9914	19.519	20.3648	24.0688	20.7677	23.1963	18.9878	18.074	23.1029	20.826	23.5714	20.9464
19.1386	17.0778	18.2745	18.4814	20.5398	22.556	18.0021	20.6719	24.0903	19.4739	19.3085	20.7899	19.0205	20.1493	18.1805	22.1908	19.49	23.786	22.7905	18.9428	18.5888	19.1876	18.5427	18.6474	21.1162	18.1004	20.4428	20.0776	21.443	18.4609	19.3992	19.0909	22.8388	22.2105	19.7031	18.994	20.3328	18.4406	18.6124	20.9509	19.3868	18.9546	20.3001	19.5432	19.1744	19.2305	19.1005	20.1531	20.4018	19.1273
24.4011	18.8404	24.0729	22.6699	20.984	23.414	23.4567	21.0551	22.7805	24.1945	23.8018	21.6328	19.7314	20.5799	23.2897	18.3637	23.562	23.3954	22.8342	24.233	21.6042	24.1316	21.531	22.8949	24.531	20.0334	21.0724	25.0902	21.1319	19.095	23.8392	22.1866	25.8443	20.852	24.7307	22.879	22.2142	24.7559	25.4229	24.0689	19.0427	22.9913	25.7823	24.4494	24.2522	18.5572	24.4954	20.2927	23.6505	27.3162
23.7865	18.3825	24.7148	24.0182	22.8457	21.7702	22.1744	24.2518	22.0129	24.0655	20.7777	23.8898	19.2861	22.1265	18.6019	20.2162	21.2538	20.561	19.5158	22.1788	18.9357	22.8465	22.5959	18.0484	21.3162	20.3329	24.4131	25.3725	21.3868	20.6781	20.3985	19.4763	25.3787	21.4441	24.5008	21.1246	23.864	24.0337	26.6987	24.3922	23.2435	25.1386	24.7668	22.7881	25.5752	25.392	23.9784	20.5147	21.1586	28.1042
20.2066	18.746	18.0889	19.6355	20.1894	18.6383	17.8715	21.2405	20.1318	18.6018	20.3138	24.01	19.6396	22.5158	18.9736	21.7716	18.9835	21.8745	17.7468	22.4421	22.5933	18.0071	18.6615	17.6829	21.8875	17.9018	22.8739	23.3556	20.7203	20.2539	18.8607	19.6577	19.8636	20.9212	19.5218	19.2307	20.724	17.809	23.2558	23.9151	18.736	20.5633	25.1379	20.5975	19.0566	18.1074	23.7502	24.6431	24.2101	23.0302
19.1761	20.2046	19.9739	19.5882	21.3161	18.3955	17.8432	21.0056	19.3042	19.0084	19.8985	20.8179	21.0579	20.863	19.0034	18.7864	19.5874	18.5297	18.3539	18.0735	17.5938	18.9127	17.3234	17.937	21.3842	18.7626	24.2795	23.1115	21.3895	19.8742	19.5028	19.8303	17.8684	20.5704	20.3172	18.9808	23.4009	21.0201	22.4077	20.4735	19.2871	22.1016	22.7681	19.1212	19.5395	23.8283	23.8533	23.1378	22.3273	20.8408
23.1936	17.6272	23.4743	20.6667	23.5293	22.2701	19.8314	23.1297	23.5819	22.096	20.4251	22.591	22.3667	23.8221	21.6185	23.1629	23.1449	22.7577	21.9982	21.3288	21.5973	23.8776	23.2486	22.1763	21.0654	22.6339	20.9086	24.5984	21.975	22.303	22.2549	23.818	22.0202	20.5786	23.8398	21.9334	23.2485	22.7602	23.3137	23.5427	19.0159	23.8662	23.383	23.3419	19.9211	21.8551	21.0873	24.9203	20.2302	24.7822
18.7076	19.9008	18.8933	19.3091	23.7776	18.029	17.941	21.3035	21.6081	22.3502	18.8618	20.2193	23.203	23.0158	19.6306	18.41	19.032	18.2247	18.1821	18.6523	20.4799	19.5546	18.1322	18.1186	21.0902	18.0734	22.8606	21.9808	20.7985	20.3557	18.3361	19.0481	20.8382	20.6019	19.9581	20.6309	20.6905	19.811	23.3338	20.4571	20.0294	20.1058	21.4279	19.8316	20.2507	21.9949	24.3647	24.4606	19.7785	21.5464
23.0145	20.6904	23.089	21.8363	20.7813	20.7913	22.8685	24.4571	24.7582	18.7079	19.9028	23.8564	20.1922	21.3669	18.3991	19.1193	19.1534	18.9475	18.9114	18.7819	20.5127	20.3048	22.8371	19.3217	21.6211	22.7438	23.1777	24.7325	20.402	18.9263	18.9123	22.0892	21.4074	21.5358	22.2397	19.472	23.9081	21.7871	25.5121	23.0073	20.4758	24.6584	23.8213	21.7172	19.9132	24.657	24.3968	22.2587	25.0064	26.4424
22.9311	18.7944	22.8284	23.9833	24.2952	22.1841	21.7357	20.4193	21.964	22.5463	19.9433	22.7271	23.3415	21.9483	17.8393	22.2212	19.5296	23.7757	18.8636	23.4303	22.6786	23.1907	20.1988	19.762	20.1282	22.2597	20.163	24.9814	20.6639	21.6927	21.3133	19.8718	22.2989	20.6248	25.3348	19.4153	20.5019	22.6443	24.3271	24.4365	21.124	23.0345	22.1475	22.0722	20.2576	21.8899	20.4499	19.9341	23.0578	18.3484
23.026	20.5261	22.6901	23.7834	20.2559	21.0588	22.8652	25.3164	24.6147	21.715	18.9835	24.1349	18.5518	25.9231	18.5918	19.5241	19.487	20.9858	20.9851	20.9705	22.7874	21.47	19.0445	22.8878	20.137	22.289	25.0143	26.2602	20.4113	21.0764	22.7479	23.8796	24.648	20.91	23.4198	23.2073	25.7265	24.1441	24.9059	24.9555	22.7938	24.0071	26.2156	19.5669	23.8115	23.3926	26.2616	25.1189	25.895	23.5362
27.3807	22.3898	27.8988	28.1034	25.3506	27.0887	26.8396	24.7303	27.1231	27.8134	27.8096	26.4429	27.7615	25.3355	25.9183	28.0884	27.3725	28.1351	26.6154	27.0498	27.9673	28.0375	28.0265	27.837	24.5177	27.5332	23.74	27.0762	27.7124	26.5956	27.8358	27.6709	28.2269	26.0053	28.8164	27.9605	27.2663	28.5919	28.616	25.4773	25.5578	27.5192	25.2653	27.3507	27.7806	28.8958	27.0465	26.2973	26.7604	30.3588
29.6223	28.8426	30.3092	30.7172	26.0013	29.9273	30.469	26.1122	30.1435	30.7139	30.5395	26.2774	31.9157	26.6606	29.9995	30.2623	29.4533	30.8087	30.0022	29.6604	31.6297	30.5081	30.831	32.2168	25.8896	31.1498	23.6747	28.8647	27.6362	28.307	30.18	30.1086	30.1321	27.5603	30.1422	30.2745	28.3504	30.5306	30.2003	27.1261	28.6999	28.9412	28.017	28.4834	29.5654	31.6206	29.0011	26.5006	27.2021	29.9788
19.2221	17.7585	19.0781	20.7303	21.3513	18.7197	18.646	21.9557	21.6982	21.368	18.7742	20.268	19.6441	21.1118	18.2801	21.0511	19.0616	21.8273	21.7766	19.1838	19.963	21.9713	21.9221	17.8697	21.9415	19.2106	21.1427	20.4182	20.4376	20.7107	21.5248	19.6458	17.9359	21.3438	19.9077	21.081	20.356	17.1936	18.2727	20.7703	19.375	21.572	20.5356	21.6647	20.3468	19.4525	18.6713	21.342	20.6005	22.3005
19.0765	17.5327	22.8283	21.771	19.9263	18.0845	19.0973	23.85	20.3358	19.3669	18.4223	19.8693	27.6317	21.1369	19.0193	17.8305	24.1918	20.4679	25.1148	18.6839	25.1434	19.0961	18.591	22.9437	20.5793	20.0573	20.2103	20.156	20.8773	18.4738	18.7492	21.1382	24.7935	21.3272	20.2432	18.8051	21.4993	22.272	18.8951	20.2493	23.0004	25.0377	25.3505	23.8174	19.3014	17.4756	19.5984	20.3753	20.8678	18.886
24.5413	17.7232	24.7302	25.7278	19.9488	27.2163	27.7288	21.0309	22.575	23.655	23.8408	20.8931	21.3711	21.6772	25.2275	26.4208	23.3866	27.0339	23.6942	25.1151	27.4103	19.8652	19.7905	28.4481	24.9952	27.2677	20.5022	22.257	20.6248	21.1725	21.9902	25.0916	25.1669	22.0824	23.7164	24.9447	19.8727	25.3661	25.2587	20.5054	19.0817	22.7756	21.0034	25.389	24.1104	26.4691	22.96	20.0196	20.8058	23.1336
22.089	17.8909	23.572	20.0091	23.3059	23.6319	18.7337	20.4881	21.1016	24.3151	18.4625	19.8944	18.4599	22.9165	22.9633	18.6095	21.9164	21.7082	23.1021	22.4273	17.9359	22.5716	18.2325	25.2753	20.3524	20.5082	21.7021	19.7522	20.6382	23.7795	20.5543	20.7383	23.2073	23.309	21.5844	20.6649	20.9886	22.5252	20.1206	23.5577	23.8502	24.3354	21.3158	23.2226	19.4998	18.5719	20.3696	24.0016	20.5021	20.7078
28.0578	25.0457	26.6595	26.0607	22.1659	28.2951	29.1104	25.1941	26.6366	28.4177	26.189	22.2143	24.6243	24.8661	28.1456	26.7027	26.3538	26.85	26.4676	28.226	25.7762	26.6811	25.9929	28.812	24.6283	27.199	22.2801	25.6232	26.5252	25.4031	26.733	27.1947	28.0925	25.9486	25.9514	26.1159	24.8933	26.6727	27.5269	24.1731	26.5436	27.9591	22.4851	25.5673	25.7099	26.2328	24.314	24.4874	25.6151	25.8964
20.5389	17.4895	20.2051	19.5997	22.4472	18.1182	18.0493	20.6916	20.3412	21.9667	19.7265	21.2437	19.8133	20.1581	20.1374	18.2868	19.2774	17.7452	18.6288	18.671	18.4667	19.4758	21.26	18.7599	20.8455	17.9505	21.4005	21.6748	21.1579	18.5612	18.9436	20.8342	18.3671	21.1461	21.0176	18.7216	20.6987	21.0719	21.2584	22.3812	18.8562	22.8424	22.4667	20.295	20.6419	22.1379	22.2378	21.7554	22.9042	19.9285
21.091	18.5604	19.7009	19.5423	20.6626	18.3173	18.1989	20.3697	21.1245	20.0006	19.5425	20.0638	18.8081	20.411	20.9679	19.0514	19.0496	18.6675	18.3735	19.5433	18.4995	19.5142	21.5781	18.4994	21.7502	18.0159	20.8786	19.4779	22.5127	19.0196	19.1287	19.4868	19.2837	21.3144	19.4687	20.0769	20.658	20.7581	18.5089	22.377	20.8217	20.0813	21.6146	19.4111	19.8152	21.3568	23.6677	20.9517	21.5163	19.6779
24.6105	24.864	22.5101	24.4046	20.5619	22.8471	23.3824	20.1474	23.9891	23.5198	21.025	20.6826	24.3339	20.167	23.9653	24.7179	23.9011	20.7801	22.4831	20.6865	24.448	22.9458	24.7818	22.9897	20.848	24.4692	20.6183	21.5056	22.111	24.2816	23.712	24.5232	22.8965	21.0492	24.3612	23.9224	22.9418	24.4823	24.8492	19.6689	23.4833	22.2028	22.9438	24.607	26.1222	24.3251	26.2261	20.9415	20.4578	24.8553
22.8704	23.1193	21.0244	21.409	21.3733	23.2736	23.3679	20.1706	23.8094	23.7705	21.9207	24.4231	20.8667	24.5644	23.1178	22.3118	21.7389	18.4144	22.5549	20.2783	23.652	20.3386	21.2233	24.4387	20.8871	22.4025	20.6439	26.0395	21.1605	22.1135	22.276	23.3609	22.492	21.6008	18.9468	21.4533	25.73	22.0034	24.6663	22.9311	22.4785	21.916	25.982	24.4824	24.2854	24.5352	24.7795	20.3449	25.9569	23.247
19.2501	19.9617	21.5354	20.3254	24.8908	22.4464	23.9601	23.8001	23.9859	21.6993	19.6105	21.4924	21.4815	24.1061	23.514	23.4504	20.5543	21.5557	21.0383	21.33	20.5078	19.1873	19.7937	26.1979	20.6142	22.1375	20.7438	20.0702	21.2016	23.5876	21.511	21.7331	17.9832	20.9736	22.0983	18.3861	22.4167	21.3649	21.4398	20.9363	22.709	20.3983	21.6037	18.8318	20.1	22.7026	22.7572	23.9314	20.7596	18.8795
19.4154	18.3661	18.0295	19.9247	22.8474	19.7815	17.8603	20.5574	20.0044	18.8127	19.1634	21.6614	18.1328	20.1924	17.7903	19.0014	19.4974	19.3212	19.2884	19.1494	18.2345	21.2391	22.0243	18.5003	20.6411	18.6491	23.4005	22.2819	20.9141	19.7169	20.4899	20.384	18.7066	21.3641	19.2916	19.9507	21.2125	18.49	19.582	20.2227	18.2627	18.5048	20.9711	20.5774	18.4492	18.5418	19.0259	20.7815	23.477	23.0038
28.3048	26.9314	28.7596	28.098	26.0947	30.1056	27.4563	25.5521	30.7434	29.5577	24.4822	24.5212	29.5107	26.0609	30.0239	27.6707	29.1362	28.8982	30.091	28.3366	29.1293	26.1823	30.3084	29.8733	27.1641	26.9866	24.4755	26.055	20.9424	28.8571	26.4842	28.6518	32.1323	23.8337	26.2155	27.0512	22.9299	28.7244	29.7601	27.0854	29.3322	28.4125	25.7418	29.2321	27.2946	26.664	23.293	25.3624	22.2781	27.9267
20.6307	18.0001	18.4322	18.9245	20.3785	18.1045	18.6625	21.3851	18.7742	20.7545	20.3388	23.7396	19.4591	21.1199	18.7325	22.1459	19.4457	20.0853	18.8753	19.0942	19.1897	18.4064	17.2706	19.4384	23.6687	18.6796	21.2092	22.018	21.243	19.5524	21.199	20.419	20.5164	21.6126	18.9936	18.9023	21.8522	20.678	20.3033	23.8577	19.0442	22.7104	21.577	20.4486	19.6787	18.1585	19.1624	22.2983	21.4727	17.9231
27.3767	26.1733	28.8778	25.7167	24.7938	25.8347	29.9746	20.1953	26.8904	27.2469	30.8356	21.5273	24.7865	22.576	28.8906	30.8668	27.7416	28.4445	28.0106	26.54	28.3686	27.8798	29.6388	29.4174	22.9579	29.2061	21.5177	24.378	25.1867	24.7383	28.0451	28.9448	31.0511	23.9337	25.1598	26.6691	21.5807	30.3471	27.5487	22.978	25.3442	27.3584	24.3481	25.9971	28.739	29.7988	28.9951	23.4082	24.7521	28.5491
22.5698	21.7453	24.2856	19.9289	20.6343	21.5263	22.1316	22.9488	22.6739	21.7322	19.6748	23.044	19.2703	22.973	24.2811	21.9127	22.6713	18.8543	22.3866	18.4722	21.8545	18.0729	20.6939	24.4125	20.9263	22.2446	20.967	22.4396	21.5667	22.164	19.1732	21.5128	22.0627	20.5642	19.0277	19.6291	22.542	17.9063	23.2681	24.2099	23.1014	21.4612	21.8318	19.8861	19.9456	20.2942	19.9473	22.6348	20.4266	21.5882
21.2004	18.5046	21.6316	19.968	20.3791	20.7492	21.4723	22.8117	18.9907	22.868	20.1783	23.2348	19.3374	20.3861	22.4462	20.5489	22.8734	19.6376	19.6076	22.2867	18.5883	19.6285	18.0056	22.407	21.2335	18.0617	23.4756	20.568	21.5291	19.2422	18.9309	19.5917	21.1169	22.2305	19.4521	19.4537	20.9317	19.7973	19.3553	20.6255	19.6126	20.9382	21.1031	20.229	19.6172	18.6309	21.9338	21.0037	20.6704	20.0257
21.8841	18.0013	21.0691	20.8074	21.2256	20.6667	19.193	20.9083	22.3803	21.3089	20.1199	21.6666	18.8682	23.569	21.2725	18.7061	21.558	18.9555	21.2396	21.2592	20.653	18.7209	19.0015	20.5416	22.7144	20.6383	20.9131	20.2198	20.8577	20.2768	19.4444	19.0602	20.3444	21.1821	19.2577	20.8665	20.9594	18.3831	19.9454	21.7146	20.4515	19.452	21.3687	20.1493	19.1117	19.039	20.6507	20.2419	20.8738	18.8418
22.3019	21.8538	23.199	19.0419	20.9099	21.5393	20.7526	20.8042	21.9915	21.073	21.6029	21.0645	18.9144	22.3442	22.4872	22.4184	22.3259	19.2369	21.8144	20.4906	23.0286	22.0966	23.2745	22.2111	21.1979	23.1285	21.2213	24.7839	21.3487	19.3991	19.7992	23.7548	20.1549	20.4035	22.511	19.4576	23.4354	20.769	23.4638	19.5176	21.209	20.228	19.9452	23.2127	23.2422	23.2814	21.9129	21.1566	21.0118	22.7745
22.5308	19.048	21.7576	18.447	23.8684	22.5558	22.4296	21.6427	22.0123	19.7189	19.0757	21.7625	20.1016	21.0023	19.5398	20.2072	21.3534	20.5411	21.7172	21.8628	21.8686	20.2955	21.0941	21.54	23.3327	20.1824	23.7226	24.0236	23.6654	21.7645	23.0276	21.3573	21.7866	21.1435	20.0976	19.5185	22.8016	18.1234	22.695	23.7322	24.171	23.0373	20.9148	18.6234	20.0359	19.709	20.6343	23.4774	23.1579	21.0389
23.8119	23.7463	26.2008	26.0373	20.8779	27.2659	28.8588	20.8065	26.1368	27.2238	27.3277	23.9331	25.0048	20.888	26.9257	29.1617	25.5666	26.4997	26.6262	26.1342	27.7697	24.5532	26.2663	28.7859	21.9674	26.7298	21.184	20.3623	21.2992	25.3437	28.8887	28.2839	28.9119	23.7948	26.1783	26.1739	21.5539	28.4292	28.9708	19.8807	25.5868	21.9901	25.2101	25.099	19.8103	29.0076	26.194	20.4694	22.1569	27.1299
19.4551	19.7336	18.1956	24.3172	20.3064	23.4691	24.8243	20.8427	19.7227	26.7582	24.4977	20.4659	19.0944	21.8085	19.4004	26.1216	19.7902	23.4133	24.5118	23.2474	25.6644	21.7474	19.8406	23.3143	25.7013	18.7622	25.1811	21.4098	27.1168	19.6697	23.3299	24.4988	23.9902	26.8928	24.0637	23.9725	20.3036	24.5908	23.4067	23.9699	23.9377	22.8592	21.9248	22.9501	21.5782	21.9964	24.6081	24.4597	24.5715	22.6855
23.3917	22.0308	25.0922	23.8979	20.6822	24.6831	25.1633	23.2044	24.6835	18.2727	19.7622	21.1253	24.3327	25.7495	25.2783	24.2585	24.5116	23.508	24.9473	23.3098	23.9977	18.1111	18.5518	24.8462	20.5607	24.6994	20.1483	24.4994	24.8014	24.413	25.0552	23.8742	22.4498	22.0256	23.5612	23.4458	22.8488	25.5277	25.1833	24.374	25.3322	27.1599	24.0612	22.8075	21.144	22.2701	24.0689	20.4338	21.1013	19.193
21.3355	21.2404	24.6498	20.3496	21.7829	21.9802	24.019	23.7642	24.4144	23.8112	25.396	20.6504	19.4049	20.8905	22.5923	25.6028	22.3958	21.3783	21.9405	20.7167	23.1784	18.5861	18.4887	23.4966	20.9796	22.9533	19.9981	23.5743	24.9172	23.7055	24.0874	22.823	23.024	21.8601	19.9418	21.0365	19.8824	24.2304	25.7607	21.361	22.7436	25.6477	20.6743	24.7229	25.0278	19.0474	19.6817	24.7758	23.2641	19.606
23.5368	17.858	22.1618	23.1322	20.6315	23.5045	22.1974	20.5898	22.3604	23.3955	23.4766	20.9644	18.9156	20.9302	23.216	22.2584	21.0691	23.8039	23.5893	24.2111	22.3872	18.3685	22.6745	22.2982	21.4455	21.5529	20.7807	22.8904	22.0345	23.2754	21.8226	19.0726	24.5336	24.4724	19.9453	19.1343	23.263	23.3857	24.4141	20.3427	21.1225	23.1171	21.6058	19.1235	22.9695	21.3729	20.3789	19.3773	21.258	21.0551
22.9111	18.5989	23.864	18.84	20.9212	22.8842	22.3574	20.6147	20.5541	23.7335	20.1991	20.928	21.9758	20.6526	22.9379	22.8465	23.8715	23.2149	22.5881	21.9192	22.0101	19.3087	18.9088	21.9524	20.9232	23.0754	19.9838	20.3965	21.58	22.5344	25.3363	21.5762	19.3256	21.202	19.9994	20.2126	20.1607	24.0744	23.3533	20.3015	23.4449	24.3729	20.5065	25.5069	20.4217	17.088	20.5941	23.9704	20.5541	17.672
20.3998	18.4991	21.4701	18.4609	21.7696	18.5576	20.6132	21.2546	21.254	22.1792	20.135	21.1365	19.9332	20.6799	20.1077	22.2644	20.9648	19.745	19.2033	19.951	21.1178	19.1343	20.3412	22.7484	21.2462	20.7794	20.7411	20.21	21.5388	20.13	20.5308	21.8216	20.927	20.79	19.621	19.2979	19.8922	19.7199	18.6609	19.9622	18.0491	22.6999	20.9641	19.7599	19.5739	19.4256	20.7336	20.2917	20.8106	18.2745
24.5205	21.3843	23.5662	22.8282	20.9336	23.4166	23.585	20.7117	24.4554	23.3316	24.1021	20.2767	22.8306	23.038	23.5193	22.4294	24.1893	23.7187	23.8773	24.757	23.7411	20.8678	22.1399	24.7131	22.9998	23.0735	21.644	20.704	25.1226	21.8557	22.145	22.4984	22.8374	23.3433	22.421	22.4749	19.9202	20.0268	23.086	24.303	24.2267	24.0756	22.8038	24.7147	19.9121	20.2134	19.5173	21.2443	21.4118	20.3667
23.4943	22.4398	21.9064	18.5004	23.5866	22.0163	22.8056	24.5976	24.6674	23.3482	18.3559	25.0457	23.8427	23.5115	21.7213	23.4155	21.3697	22.2666	22.0224	18.4998	23.5145	20.539	23.5111	24.5847	24.3913	22.6154	25.13	23.5299	20.395	25.1954	22.8736	24.1005	23.7411	20.8461	19.6582	20.3547	25.1777	22.7921	25.8255	22.0659	22.3979	22.5642	23.7745	19.9888	20.1944	20.0493	20.9905	24.7383	23.2805	21.3826
22.9246	19.0704	21.7431	20.0844	22.3515	21.529	22.2579	21.9711	22.4268	22.0198	18.0981	22.6635	19.8719	24.5408	23.1178	19.439	20.2479	18.2364	23.4835	19.4661	17.2184	19.1382	19.4669	21.0737	24.0396	22.1868	24.2612	23.0957	20.2292	20.0766	22.0276	19.1079	21.9754	24.1712	20.6159	19.5798	21.0419	17.1397	20.6183	24.5222	18.5616	22.4852	24.1725	21.8926	20.3859	18.1094	20.9778	23.548	22.9854	19.041
23.8889	23.2239	24.767	22.7162	25.2827	23.2273	22.8786	21.5183	24.6617	22.7941	20.2984	23.6154	21.6281	24.341	23.9077	22.5842	23.2096	22.8861	23.5748	23.4433	23.5803	21.9229	17.8101	25.0964	24.2647	23.1769	24.4824	22.8851	22.2784	23.8974	23.4888	23.461	22.6897	21.6825	21.964	21.7014	22.941	20.8363	23.0693	22.3221	24.2744	21.2102	24.3811	21.2262	21.4193	20.7881	21.8033	20.7549	23.7497	22.67
23.3949	17.0812	24.0418	23.8071	19.9125	21.9043	21.386	25.3669	24.9491	25.3246	23.0001	21.1414	25.582	24.6109	22.8859	24.7773	25.354	24.9618	23.6387	23.0467	25.9726	23.9451	23.5485	25.1879	23.376	23.059	22.5663	24.3928	20.2134	25.8707	23.7246	23.4826	23.6885	21.0377	23.2266	22.9931	23.5442	21.6605	25.8157	21.4452	23.4282	24.2591	22.7968	25.3197	24.1621	23.0075	20.2804	23.1472	22.4773	19.3406
20.014	16.8029	20.4655	18.5393	19.7713	19.3644	18.0857	20.6153	20.6243	18.9985	19.4422	20.6472	21.0829	21.3825	19.9052	18.7552	21.0349	19.241	18.1197	19.5037	20.5271	19.1988	20.5954	19.9451	21.2071	20.9817	20.8011	23.7997	21.0497	20.4501	20.7262	21.3957	17.7126	21.5315	20.0539	19.1354	21.9474	17.8913	20.8182	20.6577	19.1553	20.1417	21.2874	19.2358	19.4276	18.959	18.1368	19.9168	20.5625	18.4097
22.5094	20.3818	23.9411	19.023	21.5158	23.1573	23.7081	24.4603	24.3286	23.9993	22.3932	22.4459	19.4966	24.7438	20.181	23.6663	19.7939	22.9073	22.0702	20.3114	24.0526	18.7751	18.9563	23.9948	22.9349	24.7865	20.3794	23.3244	23.015	23.6861	25.574	19.6974	22.9232	21.2844	19.6592	20.0597	19.9477	22.7583	25.6309	21.8222	22.7379	22.6139	21.6834	20.0901	20.4157	23.6652	23.9846	20.9435	23.2701	19.4387
22.4034	20.2427	22.2248	18.8014	22.2294	18.9516	22.7741	21.1639	24.3071	18.6979	18.0735	20.9773	22.3153	20.7865	22.3713	19.8654	22.4776	21.2058	22.4127	18.6127	20.7846	18.8168	19.8784	22.2786	24.4374	23.5602	20.4367	23.8996	22.0468	23.8277	22.4052	19.1426	21.6031	23.8445	20.48	20.004	23.2111	18.9098	21.3407	20.4311	18.6766	19.659	20.4312	22.8686	20.7274	18.8523	19.5969	19.9067	20.3722	19.1875
22.913	23.7639	18.8157	19.7588	24.8693	20.295	18.3002	24.8309	25.4726	19.4103	20.7465	22.5863	24.143	20.9702	22.8147	23.3167	22.7543	23.8946	23.5543	18.0404	27.556	21.8701	23.2805	22.5082	24.0338	23.6704	23.8291	24.6318	23.3477	25.2259	25.9028	22.6839	18.5224	20.8704	22.2496	21.2675	25.6028	23.965	27.5424	24.5198	19.5519	23.1647	25.5024	23.9532	20.1067	24.2113	19.2348	22.7086	24.2	19.8845
24.1356	16.7764	21.5509	21.8261	19.7579	22.7399	19.8776	23.5756	26.3592	23.811	20.9251	20.9374	24.0709	22.3545	20.9177	23.1035	25.7655	22.0801	23.2284	18.4185	24.9723	22.031	23.5328	24.3953	19.9642	23.965	19.8363	22.6412	21.1159	23.7541	22.2018	19.3768	19.2914	25.1085	23.1638	23.6915	23.0379	20.9888	25.1159	21.6176	19.3382	18.9061	23.6334	19.8816	22.6254	22.9719	18.9982	21.4238	22.3329	22.2676
21.6095	18.1803	18.5857	21.0115	20.4698	17.9212	17.3283	21.1308	22.5388	20.9429	20.6341	21.3916	19.8878	20.6806	21.0823	21.3111	20.5854	19.2801	19.716	18.0918	21.9731	19.8889	21.9567	21.5597	20.7844	20.4933	20.6329	23.8269	22.648	19.665	19.3521	20.2321	20.3348	20.1806	19.5467	19.0088	22.4593	20.1491	22.9328	20.8512	21.0127	20.1455	20.6647	20.4602	18.199	22.7391	20.6375	20.6431	22.0226	19.8683
20.6672	19.8539	19.415	19.5851	21.3186	18.9559	18.3517	20.5402	20.1037	19.3636	19.4773	19.8279	18.0209	21.2828	18.9234	18.4876	18.995	20.1198	18.194	19.6158	18.0464	18.9794	17.2856	18.1062	19.9492	18.1179	23.3257	21.5985	20.6503	20.149	20.1021	20.0734	18.1867	20.5972	20.1278	19.6631	20.2902	19.7679	22.6376	20.8414	19.9311	19.812	22.435	20.4467	19.4984	17.4786	18.982	21.0166	23.2678	22.4181
19.6639	19.5399	21.9427	19.6468	21.1593	18.9961	22.0574	20.9285	20.4577	18.8981	18.753	19.6671	17.7503	22.5612	22.3145	19.4467	18.4591	21.2993	21.8597	22.2685	22.9068	21.3335	17.7173	22.3819	20.7429	18.2587	21.3251	21.4413	23.2435	20.0904	19.7184	21.3512	17.8575	21.1387	20.0495	19.575	22.379	18.4499	18.6777	20.2724	19.9173	21.7354	21.3245	19.6631	20.852	18.3308	19.6712	19.8357	20.14	18.9243
27.1286	26.6938	26.743	26.8676	20.5262	26.5344	29.1376	20.8762	26.2245	27.9035	28.7676	21.6548	25.3123	21.2466	28.2282	29.5075	26.8977	26.6948	25.6071	25.9279	26.2563	24.9198	28.1607	27.4026	21.6892	27.7525	21.1383	24.6615	22.2191	25.0012	29.0409	25.7345	29.9948	25.7178	26.9654	27.2502	23.1324	29.3725	27.9316	20.4994	25.0387	27.0204	27.094	27.3241	28.3449	30.0074	28.9631	20.9595	19.9882	29.1999
28.0969	26.3802	25.5102	26.8096	20.1298	25.8438	28.2933	22.5693	26.2242	28.3895	28.6553	20.5053	24.6941	25.5457	26.4945	29.5335	27.1119	25.5409	24.62	25.9603	26.0751	25.9401	27.7208	26.703	21.5117	26.406	20.8853	25.264	24.3147	22.6012	28.0438	28.915	29.1846	24.9157	26.6343	27.3375	25.7601	28.1703	28.5248	23.3032	26.2774	28.0378	24.3275	26.4348	28.3247	29.5422	26.8782	19.251	23.8935	28.207
21.6577	17.5097	22.5065	21.7713	23.7176	19.3232	21.8606	23.4615	24.1923	21.8833	20.3219	21.0103	23.1767	22.8777	19.3142	22.3895	22.3556	22.8761	20.6231	18.1292	23.9444	22.2373	21.8422	21.8849	23.1356	22.5517	24.3855	23.2519	20.7136	21.9471	22.6202	20.1321	22.9017	22.309	22.0525	23.1497	21.5242	23.9003	24.6845	23.6728	20.7852	23.2327	24.8612	21.1118	24.0179	23.457	21.6281	23.6891	25.6881	25.5175
21.3655	17.616	25.0159	25.2183	24.1128	20.6526	21.9263	24.8728	23.7096	25.353	17.82	24.9744	24.7527	25.2678	20.1582	22.6338	23.2415	25.9447	25.7325	23.0193	27.1785	23.8605	17.3442	24.0194	24.4564	23.0871	23.1758	19.7007	23.6049	24.6286	24.5216	22.6891	20.3576	23.3024	23.5587	24.2936	24.7897	21.3369	26.7602	24.218	24.7659	24.7061	23.7024	24.8839	19.1762	21.0639	20.1579	20.0559	21.0397	19.6152
20.7921	17.9797	22.0167	20.5057	19.6192	17.4292	21.1505	20.1331	22.2523	21.2304	20.0565	21.4301	17.7246	20.967	19.742	21.7658	20.4776	18.1519	19.8704	18.3813	22.7628	19.7368	18.069	24.9651	20.4239	21.9811	20.4617	25.8231	22.6996	21.5784	22.4514	21.1479	21.8041	21.0229	21.894	19.8483	24.8166	23.8371	25.5412	20.9007	20.2632	18.9547	24.0704	20.4137	18.9656	22.4635	20.663	20.2813	22.6742	19.8284
19.9418	18.9165	22.0666	27.4829	23.4521	24.109	22.9296	21.79	24.0331	18.2254	19.6376	20.5272	22.8064	23.3117	23.0681	18.9528	18.5072	25.393	26.761	19.3025	25.8841	20.5121	17.9182	18.1657	21.3212	21.3228	19.7556	20.5765	23.6649	24.1879	20.5242	21.8581	18.6374	21.3588	18.9375	26.5185	21.7556	22.4167	21.3099	21.0466	19.4347	19.4669	23.7694	24.7052	21.65	18.2547	21.1311	19.8227	20.4199	18.7614
21.0569	18.4476	17.7035	19.4235	20.6054	17.8341	19.0772	20.7475	19.3031	19.1343	18.8943	20.0755	20.7169	21.2957	18.2921	19.7813	19.1016	17.8122	18.3124	19.1316	17.9318	18.692	17.6748	18.3146	21.7319	18.1522	23.0418	21.1114	20.9302	19.457	18.7604	20.7598	18.5864	20.7178	21.417	18.0772	20.6855	18.3854	18.7507	20.3912	19.702	19.7167	21.2874	19.5278	20.4246	17.629	20.2138	20.0819	22.0466	20.2087
20.3763	18.4644	18.2909	19.7089	19.6535	17.4435	19.925	19.9734	19.0322	20.0818	18.2938	20.1369	20.4115	21.0445	19.3184	19.3574	18.5422	19.3966	17.7121	20.5078	18.1491	19.3426	18.7265	17.9774	23.8473	18.3541	20.9378	20.8161	21.4884	18.2055	19.2974	19.9325	18.0767	21.6893	19.857	21.1146	21.6984	19.265	19.7958	21.9085	19.8834	21.9744	21.1715	20.1614	18.9513	18.773	19.5802	20.8215	21.5316	19.1213
19.0865	17.6622	22.3997	19.259	23.4359	20.369	22.5257	22.0513	22.3316	18.8849	17.6815	23.3782	19.1976	22.7358	21.2195	22.3779	20.3187	22.4622	22.4304	20.5818	22.4275	19.2549	18.5314	20.124	21.5614	19.8391	20.182	21.7772	24.0081	22.3627	22.6804	20.1875	18.2852	24.3512	21.7094	19.3582	22.7801	20.3177	22.7305	20.63	22.6133	22.7345	21.4352	20.9567	19.5646	18.4937	18.848	20.2383	20.7321	19.5175
19.9454	17.0142	20.2073	19.8011	20.6139	17.4842	18.6228	22.3791	21.1868	19.7786	20.6293	21.7189	18.4375	22.2967	19.3584	20.737	18.9779	21.4004	20.7278	21.3253	19.6424	19.7565	20.1026	18.7763	19.7945	21.5351	20.7362	21.1906	21.209	19.3949	19.5374	19.7856	19.8188	23.9468	20.7946	21.0282	20.6883	19.8822	20.205	19.3497	20.001	19.1432	21.0922	20.7293	21.1071	20.6822	19.5115	20.6432	21.1146	17.3935
19.9788	16.3533	18.4224	20.1947	23.3542	19.1161	18.559	20.806	19.0878	20.5315	18.4139	22.4468	18.5409	21.2559	20.2162	19.895	18.7783	18.4722	18.1087	19.1354	19.7474	19.6958	18.5357	18.724	20.8402	17.4391	20.5627	21.4583	21.219	20.8128	20.2515	20.6215	20.5711	20.282	18.6984	18.0538	20.732	18.815	20.8982	21.9581	18.9758	21.046	21.3615	19.8266	19.9978	19.6855	20.158	20.9799	20.4554	21.9179
26.1274	26.9268	28.3564	25.5369	22.816	25.453	26.4391	20.7091	24.8264	27.2177	19.0679	21.0539	25.5524	16.8184	27.1197	26.6061	27.6292	25.5123	24.5685	24.4954	26.2031	24.8645	18.6035	28.668	20.6295	26.2775	21.4961	26.8915	20.3551	27.7729	25.2883	26.5536	24.9841	21.0417	19.7995	25.2328	26.8996	26.9466	28.2111	20.2218	26.516	27.8287	21.2661	20.1556	20.5285	24.4178	29.826	20.5339	19.9052	18.8403
26.6666	27.4494	25.9329	26.8822	19.0676	26.4816	25.9488	24.606	27.7143	27.0983	27.2573	25.4747	26.9858	22.9584	27.0847	26.3592	25.7749	26.7175	25.7527	26.1592	27.3985	26.4529	27.7746	26.2823	21.1592	26.5376	20.6178	26.6811	26.2071	26.6178	26.9463	26.8563	25.0672	24.9665	27.8044	26.4341	22.8056	25.8211	26.9555	21.1302	26.3163	27.03	24.7691	25.0659	27.9901	26.9924	29.6651	23.4953	23.7786	27.9165
22.8301	18.1712	22.5569	21.7847	21.3232	23.5326	22.9212	21.5862	24.3553	22.7455	22.7182	19.4937	21.2303	23.0459	23.1462	24.8031	23.7273	23.1685	23.5443	23.7886	21.487	20.8922	18.6906	23.9788	20.8941	22.6953	20.9615	23.5324	19.9614	22.7756	24.1125	22.8084	22.0369	24.4727	22.924	19.2934	22.2902	23.6765	23.3058	23.1662	23.8853	23.9408	21.092	24.4221	18.8504	19.2686	19.9835	22.5106	21.0561	20.3474
20.6967	17.8496	20.8284	19.6253	20.2071	17.5243	19.4282	22.9888	19.6262	19.375	20.6712	20.3471	20.0839	24.5023	17.8042	22.2096	19.4808	17.8511	17.7261	19.1948	17.1644	18.0101	18.1297	18.2019	20.9036	21.9781	20.8841	20.0788	20.4323	20.5468	19.7223	20.5712	21.6637	20.711	21.1121	20.7713	20.4265	20.2798	18.4464	20.0055	20.2069	22.0255	21.6269	18.3921	21.3592	19.7173	20.3805	22.1238	22.6511	18.4815
22.2966	19.5799	23.5899	23.1487	22.6577	22.8112	22.9365	22.9507	23.9437	24.3481	23.8155	21.5676	22.3897	24.3682	23.4869	24.6052	23.8579	23.1199	23.1423	23.6116	23.2147	23.0427	19.3754	23.5001	20.45	22.6278	24.6252	24.4942	25.1365	21.9977	23.0994	22.3068	24.3245	23.4699	22.4063	22.937	23.3476	21.5696	23.9369	22.716	23.7829	23.2373	22.8796	19.5933	23.4335	21.5439	22.9351	23.5444	23.1942	22.4256
22.3319	17.9515	24.6309	23.0511	24.6532	23.4734	25.2656	22.3782	24.7735	23.7485	19.6199	21.9626	23.246	24.0513	24.6403	24.7976	24.3082	23.7786	24.2007	24.3047	23.2186	21.3921	22.5722	23.9761	24.7049	23.323	23.7386	24.6535	22.7554	23.7304	23.4033	23.9782	24.8835	22.4338	23.3818	23.3032	24.4146	22.8478	24.9096	24.0042	24.7153	24.0473	24.673	21.6464	19.1633	21.0567	23.6784	22.5786	20.7679	21.2256
22.2411	18.5887	22.4106	20.1383	21.6855	21.1717	20.61	25.647	22.7748	22.2691	18.6261	22.6987	18.8945	25.197	20.4261	19.3618	20.7662	21.343	18.5248	20.4792	19.4958	20.7857	18.3582	22.0434	23.5517	21.661	20.7562	22.8075	21.8835	21.1789	23.4964	23.099	20.3465	21.7356	20.8658	19.3916	20.4566	19.2162	21.1596	25.4781	22.8316	24.0527	20.6175	21.838	20.0475	18.6198	19.8638	22.0845	20.3615	18.231
23.0199	18.4453	25.5629	23.752	19.8785	18.0226	18.9835	21.4216	19.6521	21.4327	23.3339	23.9252	19.8054	25.458	17.8184	25.5329	20.7692	18.3349	19.3644	18.7797	18.2013	19.0393	22.6608	18.4155	20.0836	23.1498	20.3055	25.5237	23.8943	19.489	24.3404	25.4199	18.3353	20.7315	19.8867	18.7013	21.2296	19.3857	20.5972	24.6616	19.2819	19.1179	21.4627	20.8445	19.4836	20.8957	20.6692	23.9953	23.7256	18.9139
24.1878	26.1031	27.5506	28.7661	19.5433	27.3357	28.9124	20.7673	28.9153	26.0586	27.5586	20.8884	28.6828	19.9911	27.938	29.3866	28.279	28.8275	28.6175	27.1455	30.6085	28.1503	28.0605	31.5269	19.71	30.9118	21.2998	26.2291	23.5387	25.4443	26.0509	28.929	30.0501	24.2664	21.1992	27.9936	25.1288	30.8833	29.3307	20.8433	27.5734	26.8782	21.4888	30.2694	26.99	29.4946	26.0892	20.459	22.346	28.09
26.4836	25.1812	29.7363	26.8106	19.9442	28.452	26.6056	22.3136	27.8682	27.5292	26.8764	24.4457	27.0419	23.7124	27.6969	25.6569	26.6663	27.605	29.7017	28.9068	28.7829	26.9678	28.5304	27.683	24.4215	28.2944	21.7363	25.9897	23.0374	28.4541	24.0503	25.4686	28.092	21.9992	26.5701	25.9272	24.8431	26.874	26.6044	24.9201	28.2036	27.7016	23.8988	25.1253	24.1355	24.8177	22.6918	23.3558	23.909	25.8656
24.03	17.3727	26.0649	24.5332	20.4652	23.5197	22.9157	21.8988	22.6627	24.9598	23.41	23.3573	22.6959	26.7576	23.4812	25.6618	24.6097	24.4373	22.9156	24.342	23.3379	24.1955	24.5117	22.6413	20.1569	23.3052	22.5748	24.809	23.1491	22.8536	23.6855	24.7876	25.7245	23.5458	23.731	24.928	20.5738	21.5972	24.5722	24.1197	22.2546	25.2383	21.1213	24.4543	24.1836	24.2598	19.6971	23.7062	19.8918	24.7269
25.5046	22.9285	22.3218	23.6296	24.4302	23.2415	24.5814	25.3463	25.5055	26.1951	23.7157	25.3927	19.4777	25.72	21.8794	25.7866	22.3461	23.1556	22.2192	23.0763	20.262	23.3435	23.5572	23.1097	27.3978	21.5248	24.6224	24.1146	25.3619	22.3961	24.5851	24.755	25.8019	24.8094	20.2565	21.5838	20.776	22.9319	25.4173	25.0379	23.8003	26.7261	20.174	25.4852	23.099	21.3501	24.0851	25.0306	24.4673	23.082
23.0906	19.2159	21.7972	21.7428	20.3021	20.1769	24.0567	22.7509	23.1359	19.3184	22.4034	20.6175	19.3658	21.9702	17.8588	22.6785	20.354	18.1133	18.4318	18.8206	21.388	21.9307	21.255	21.8713	20.7378	21.1225	19.8595	20.8191	22.8242	18.9168	23.0072	22.7285	22.5763	21.6869	19.2736	18.7952	20.4574	19.6799	22.7633	19.8545	21.4945	21.8226	20.6553	19.2954	21.4649	21.2993	19.1493	20.6231	20.3175	20.6314
20.9069	17.9873	18.1247	19.7932	21.1796	17.7943	20.4308	20.3577	19.4428	21.214	17.8599	20.6272	17.9557	20.8258	19.4774	18.3141	22.085	19.0708	17.8052	19.8708	17.9168	18.975	19.1612	19.9865	23.2758	18.1382	20.637	21.3198	21.2931	20.2613	20.4865	20.2629	21.9962	21.9691	20.6016	17.8122	21.12	19.6675	18.87	20.2662	19.619	23.3936	20.2299	21.5576	19.4225	18.9692	19.9079	20.9634	20.7321	19.9871
24.7597	18.833	25.7694	24.0038	20.3538	18.7806	19.5474	20.4134	20.1975	20.0903	19.1955	21.4019	17.3132	21.9961	18.533	26.5891	19.4843	18.8932	18.2933	18.9799	18.9364	20.4444	22.4884	20.8827	20.556	24.2749	21.0932	22.0063	21.2076	17.9738	23.6412	26.9374	18.0623	21.6188	21.4882	19.1163	21.0801	20.2973	20.7818	23.647	17.8122	19.6231	20.2962	19.1008	19.9978	22.7915	18.4815	20.3545	21.0426	18.1187
26.5593	26.2059	25.8101	24.6153	21.6734	24.4123	25.4292	24.7725	26.2968	27.5986	25.9507	23.0519	25.3365	24.1432	24.4523	27.5245	26.0961	26.4025	25.4462	25.2493	25.9501	25.4679	25.5221	24.6212	24.6182	25.5306	23.8037	26.6578	26.4548	25.9448	26.8045	26.9042	26.2529	21.4028	24.6037	24.1765	23.7783	26.2578	27.9164	25.6518	25.7569	26.8416	22.7598	26.2499	22.9521	24.8171	26.7502	25.2276	27.1748	24.6984
22.1052	16.7307	18.8302	19.704	20.677	18.5977	17.8734	24.5636	19.1267	19.6954	25.0989	25.8575	18.0818	25.6592	17.8985	23.555	19.5399	20.8391	18.0697	19.2545	23.6387	20.1687	18.1775	22.6515	26.7237	19.0855	25.9122	26.2684	26.3364	19.2249	22.8318	24.7848	19.0406	21.1003	25.4378	19.9436	26.0634	17.6914	24.9879	21.3014	19.0429	22.1426	20.7864	20.4494	19.8425	19.2063	19.2062	24.1278	26.0375	19.8967
22.755	17.9766	23.5756	20.2147	20.6042	20.0712	18.9881	21.2451	22.5314	20.9807	19.9791	24.9369	19.0807	23.9222	22.1609	21.0799	19.1513	20.3239	22.147	18.8216	20.8904	19.0726	21.5748	22.3589	25.035	19.8837	19.9592	24.4571	20.5687	20.0187	22.0931	20.961	19.865	21.299	18.4839	19.5295	20.3666	20.3838	22.3499	23.3577	20.3249	24.2883	21.8302	19.0875	20.1958	19.3599	22.8567	20.0114	23.4337	20.3606
20.017	19.3037	20.9843	20.1529	20.0603	20.45	19.0315	19.83	20.2801	21.1234	20.1297	20.1636	18.768	19.9759	19.2564	18.8323	20.2996	19.7651	20.2021	21.4786	18.3759	18.3863	19.2053	19.5235	22.7441	18.6578	20.6313	20.6533	21.6667	19.6214	19.7598	20.1831	19.7857	21.2646	19.6421	19.5443	20.8357	18.8196	20.1807	21.5557	21.2828	18.869	21.7832	19.6544	19.7362	18.0201	18.5655	22.3489	20.6202	18.4671
22.8586	20.9465	23.6352	22.6495	23.5385	20.5449	23.2061	24.3311	23.0331	21.2984	18.0311	19.7892	20.5676	26.0021	23.3909	22.9088	23.2675	23.0884	23.0037	22.6861	23.0537	18.4796	19.1434	23.5065	24.2211	21.2056	22.8048	24.0459	24.0763	22.1564	23.0459	23.5306	20.6866	23.7201	20.3769	21.3501	22.9088	21.1871	23.183	24.2135	23.926	21.5764	20.6772	22.5513	19.9693	19.629	23.4264	21.6259	20.8748	19.4516
18.6782	17.3986	21.9941	21.1735	21.8252	18.6017	20.1714	20.604	23.042	20.4338	22.242	19.4073	20.4504	23.1673	22.0902	22.0648	19.1895	21.93	21.444	21.1027	22.504	19.8729	18.0367	17.4476	22.9299	18.5978	22.8815	20.8479	22.2985	19.6356	20.3595	20.6394	18.5988	21.3976	20.6506	18.836	20.7725	18.8635	21.8448	20.5569	18.7377	22.0747	20.7894	21.0803	19.736	18.4201	18.6655	20.8331	20.5435	18.8237
23.7445	18.1329	24.3598	18.1876	19.641	24.1232	25.3495	21.095	23.6321	20.1962	20.4152	20.4577	19.4867	20.7836	25.7927	22.8079	20.1729	18.8972	24.303	23.4671	18.476	24.4837	18.6663	24.5801	25.6077	22.3298	21.3471	23.6832	20.9348	18.956	20.5638	20.5842	25.6242	21.5549	23.3171	18.2637	21.0904	26.2208	24.437	23.4139	18.5382	22.6102	19.4625	20.0549	19.5876	23.886	20.9754	20.4865	20.5434	18.7557
20.9674	19.7467	18.7841	21.2627	20.372	18.6653	19.2381	20.8492	21.7865	21.0567	18.6501	23.2395	19.3472	21.7465	18.3927	21.4511	19.3387	18.9589	19.0358	19.7219	21.2772	17.5023	19.2273	19.5739	21.5343	20.2816	23.4728	22.1689	21.4386	18.407	20.5249	19.0508	21.8103	20.8483	20.0223	17.6802	20.1774	19.8066	20.7579	21.1086	19.92	21.9502	21.1131	20.5454	21.0075	20.4428	20.9045	22.8008	23.6451	19.3963
22.8193	23.6396	23.8825	24.2463	21.9299	18.2209	24.7793	24.287	24.1512	23.338	23.565	20.2719	18.3044	25.0314	22.7338	23.777	22.566	21.4897	21.697	22.4654	21.5849	21.6092	19.1594	22.9167	20.6136	22.7642	20.3195	25.255	20.1862	22.3153	25.5105	24.0144	23.4411	21.769	21.6617	22.8989	19.8749	22.656	24.4627	23.357	22.5923	24.1044	23.4351	23.7774	22.4457	23.1993	24.2028	19.5931	21.06	22.5532
19.0143	19.0822	21.2262	19.4845	18.6078	21.4358	18.6309	20.858	22.9491	18.7095	20.3297	21.2717	21.5448	22.9715	22.1083	21.4827	21.6398	18.5274	22.6587	21.113	24.2739	18.7989	22.0898	25.07	20.9739	23.1599	21.2974	22.0273	22.5805	22.415	18.8728	18.8285	18.5369	20.0245	21.7881	22.0429	23.3899	21.619	23.8511	22.699	22.9152	19.5109	22.748	21.8602	19.1001	18.8607	19.2391	20.047	20.4365	19.2234
21.5935	18.4753	20.7983	22.0701	20.8008	20.0822	19.9632	20.4376	23.8356	20.9286	20.8257	23.3888	17.5004	21.5658	18.1663	20.2341	20.9516	21.1984	22.667	21.6131	21.9869	19.6214	22.6937	22.2728	20.8928	22.193	23.5864	24.1946	21.719	17.8471	23.1086	22.732	19.3819	20.8936	23.0692	18.3782	23.2595	20.0638	22.6527	20.9131	22.8457	20.0397	20.7327	18.9943	19.7752	20.6767	20.7859	24.2522	23.8432	19.105
20.5597	18.4102	22.1814	22.4218	21.3678	21.6872	21.671	20.098	20.9729	23.2871	22.6582	20.3308	18.9019	20.8475	22.7535	23.4626	21.6693	22.7344	22.858	23.6012	22.2507	21.2512	17.0006	20.2792	20.2864	21.1731	20.7156	21.4667	20.5841	20.1511	18.6795	22.314	18.9496	21.046	19.3932	23.2579	21.8763	17.8233	21.4032	19.7869	18.5246	19.1687	20.0785	20.4704	22.0711	18.1077	19.5389	19.7084	20.9266	21.4111
22.7147	23.7288	23.4351	23.3525	19.7347	22.5056	24.7482	22.556	22.2826	23.6807	20.21	20.699	19.7242	20.3978	19.1446	26.6194	24.1386	21.7058	21.7146	19.6677	21.3475	24.8315	23.7455	21.8232	23.2608	21.9475	21.5861	21.681	22.2247	18.5168	24.2292	25.9786	26.2405	21.6578	18.8849	19.2854	20.6171	25.5115	24.6282	22.6987	23.5546	24.3558	21.1092	22.2564	24.6239	21.9097	25.5526	20.1707	20.5717	22.3372
23.0137	18.6624	21.2448	18.1639	20.3666	18.2646	21.566	21.5428	23.4486	19.6995	19.2984	23.9481	17.6801	24.1505	21.4062	21.8163	21.8994	18.5699	21.8572	18.6983	22.8631	20.5616	22.7333	24.2846	21.3285	22.1598	21.2277	22.5211	21.664	21.3857	22.8668	22.7019	24.235	20.9627	18.3666	19.0014	23.1582	22.028	23.4829	24.3104	20.6284	24.1575	20.3202	20.8555	20.9823	19.7833	17.41	26.0604	23.4135	21.1225
25.1792	25.0189	25.0824	24.678	21.0395	24.6306	23.9759	19.7516	24.314	24.6524	24.2441	18.9649	25.5714	22.7107	24.0551	23.8761	25.4342	24.6188	24.2221	24.0343	25.3396	25.4691	26.2419	24.3463	23.5858	24.7664	24.0323	25.2691	25.4144	26.054	24.9356	25.4199	22.3964	26.6366	25.1537	24.8048	24.4226	25.012	25.5595	24.3605	23.7186	25.5845	24.9523	25.0273	25.2539	26.1365	26.5223	23.7548	25.3105	25.0413
21.94	19.6894	21.7856	22.4893	20.0734	19.4372	23.0176	25.8797	23.2188	22.6306	19.6477	24.4747	18.8915	26.6299	22.9714	24.3981	21.7332	19.6617	18.8566	19.3356	19.292	19.2097	22.4763	19.8895	25.7298	22.8108	25.8488	22.317	24.2851	19.3872	23.9146	21.929	23.4943	24.3536	18.9866	20.5293	25.2563	22.2564	24.8266	25.1604	21.7293	23.0011	20.4372	22.0351	18.5058	21.1176	21.6618	25.4459	23.2585	19.3645
21.276	19.8193	23.307	20.6344	20.4458	18.4352	17.3434	21.4426	22.3479	20.5655	20.4608	21.0614	23.4126	23.2136	24.645	20.2913	23.9808	18.7355	21.0436	19.2497	21.8729	18.5202	16.9746	23.02	20.6338	22.0301	20.8651	22.8697	21.0009	20.5806	21.5054	21.2652	17.8702	22.1894	19.6201	19.5275	22.9511	20.2386	18.5569	20.8586	19.1055	18.688	21.8327	19.5796	18.6695	19.2541	19.3227	20.0677	19.7107	18.9396
18.7239	23.6999	23.4505	19.5183	21.2642	18.7293	23.2942	20.5892	22.998	18.8252	20.0975	22.2671	23.769	21.372	21.9795	20.3269	22.7203	20.45	22.7316	20.4198	24.2476	17.9512	18.3532	24.3857	21.112	24.3237	21.0012	22.4842	21.2255	22.6813	23.3153	22.6804	18.954	20.5397	20.1199	23.6191	22.5829	20.837	23.153	21.1382	23.0804	18.8637	20.9561	18.9772	19.3264	17.4303	18.3375	20.1735	19.7748	18.3967
25.4549	24.3996	23.6229	18.8195	20.9272	22.8241	26.3243	20.9232	23.2879	26.9351	18.8554	19.5185	18.3296	19.8185	24.5637	27.0501	19.1905	23.3501	22.1183	23.4104	23.8418	17.371	26.0681	24.7352	19.9233	24.1773	21.3737	20.8229	21.1867	19.2011	18.3543	23.6107	26.7231	21.3655	20.0073	24.6551	21.6302	25.3411	24.752	19.9968	23.3609	25.0159	20.4042	19.5231	25.4649	27.1724	25.9131	21.0364	23.2155	21.0348
19.4703	23.1419	19.2728	22.2269	20.4283	20.3785	22.5853	20.848	19.9539	21.811	20.7419	20.3514	20.0921	22.7468	18.9632	23.8772	20.0334	19.021	20.3	19.7411	19.5182	21.6134	21.548	21.3148	20.6278	19.416	21.1622	22.252	23.0707	19.0109	21.2983	22.7776	18.9962	21.559	19.1661	20.8561	23.6231	17.5965	21.5771	20.5903	20.8361	22.2343	21.1495	20.0549	22.5424	18.1896	19.8896	20.2554	18.9872	20.774
22.5464	17.6203	22.0899	21.8026	20.6195	21.5823	20.7023	22.2208	20.2447	22.038	20.7767	20.8402	19.0435	23.9271	21.5814	19.4568	22.5003	21.5128	22.3029	22.0847	22.7777	20.6709	19.9968	21.5027	22.5176	21.6832	20.439	19.7269	21.337	19.7409	21.3135	21.0144	20.4153	22.2511	21.298	22.1896	21.4314	17.1706	21.5652	20.2118	21.1605	21.8407	21.8643	19.9113	21.8135	20.099	18.7015	18.9221	20.2482	19.6968
20.0784	19.3671	21.3329	20.3033	22.1047	18.2657	18.8543	21.8869	22.6231	22.1977	20.474	19.6253	20.6126	20.6682	18.8083	21.7933	20.0243	19.9169	18.8606	19.6817	19.4129	18.065	21.5646	19.122	24.4191	18.9974	21.3814	21.4868	21.7483	19.6194	22.0266	20.0173	21.8616	21.1304	20.6117	19.7296	20.641	17.215	21.3503	21.9118	19.3478	22.5322	20.8924	23.0417	20.9538	18.7258	18.8777	20.4788	21.2564	19.1484
23.3284	17.7062	22.6109	22.8158	22.3742	19.2297	23.4831	22.1663	23.9691	23.2312	23.7208	22.0206	19.9665	21.2072	20.3417	24.9588	21.7315	22.4723	21.5178	22.0109	23.1137	22.4607	22.4956	22.5716	23.8465	19.5009	22.6926	22.9732	23.8661	18.7107	23.2802	23.9855	24.0137	24.0846	22.322	22.0545	20.1461	22.2794	25.2958	23.6551	19.9958	24.6273	21.0078	22.3814	23.477	19.3828	20.0778	23.8522	21.9944	22.2367
22.3141	17.9953	21.3826	21.9999	22.3077	19.1716	22.7585	20.2859	23.0285	18.2388	18.9351	20.3453	19.0099	20.9374	21.3261	21.3554	21.8749	18.571	19.6785	18.0302	20.9174	18.967	19.6884	21.8845	21.3781	21.2268	20.4854	21.9711	21.5147	20.2723	19.8713	23.0582	21.9161	21.7682	18.5176	18.5804	24.1496	19.9972	22.9141	22.8715	19.8936	22.2454	21.8783	20.2379	21.3735	22.301	21.0429	24.0518	25.3888	17.735
22.5085	17.8372	21.641	18.9145	20.5864	20.0039	21.2968	21.2518	22.0359	18.6262	19.2029	21.1121	20.7453	20.9471	21.3023	18.4235	20.7836	19.9811	18.9228	17.7908	21.2863	18.6847	18.4624	22.6656	20.301	20.4861	20.6413	20.0165	20.7161	22.3216	21.2312	19.393	21.0069	21.5457	19.6481	20.2079	20.2134	20.0836	22.1887	22.2495	20.4456	19.4117	20.6874	19.813	20.7253	17.3055	19.2892	21.1028	21.211	18.4531
22.4595	18.7543	22.1201	20.3332	20.7143	20.7578	22.3943	19.8525	21.3637	20.8556	19.0565	23.2515	19.3764	20.4855	20.592	22.8644	21.3129	19.5069	18.4875	20.7495	20.9028	20.2038	19.3898	21.7736	23.4079	22.3947	20.5561	22.3703	20.7673	18.0102	21.1476	19.4778	23.2661	24.2736	20.3114	20.817	21.2181	23.5856	22.5968	21.3173	23.1756	23.916	20.9284	21.45	20.6622	19.798	19.6591	24.8118	24.1572	17.9173
22.2144	20.4733	22.0138	20.0772	21.9422	21.9185	20.8453	23.7616	23.817	23.5679	21.213	21.3681	22.1424	20.7784	22.7581	17.8088	22.1914	20.7069	22.6214	22.2903	22.4332	18.7742	17.7991	22.2713	21.2529	19.5283	20.9684	23.0654	21.7152	23.7288	22.7843	18.5888	24.7122	21.4163	20.6806	19.123	20.7399	17.9562	22.8547	23.139	22.9856	23.0007	21.2005	23.3019	19.4468	17.2826	19.7369	22.3164	18.9695	18.4858
22.0472	18.9686	21.4299	22.4837	20.8657	20.2852	20.6399	23.1256	19.7258	21.3501	18.3129	20.9842	23.1485	22.8084	20.9711	17.8506	22.5695	22.2893	22.4352	21.5751	22.2062	19.3336	19.3575	22.1203	20.6966	21.3378	21.1664	19.7662	21.717	19.9479	22.1822	19.7683	20.1972	24.3903	19.1865	21.0062	23.0097	17.2586	21.6779	20.5569	22.9986	23.4736	23.0231	19.6757	17.5522	18.0137	21.0478	20.5929	20.5638	18.6532
25.2786	24.2684	23.7126	25.2955	20.1858	23.0361	21.5847	25.4774	24.7221	24.8478	25.6027	20.4156	22.5347	20.5933	22.8114	24.4925	23.9203	21.4118	22.807	22.4854	22.1846	22.5106	26.3162	20.6914	22.7021	23.2694	20.7278	25.2499	19.7879	18.1668	22.6232	25.5569	25.1632	21.5471	22.9692	21.8758	20.7505	24.5633	25.2096	22.7072	24.4085	24.5299	20.917	25.3748	20.6565	24.7414	23.6763	20.0991	24.9875	24.0767
28.4412	25.4105	28.2516	28.9466	23.6715	28.2951	27.3544	23.4031	28.975	28.3879	27.8829	22.5796	29.1354	25.3705	27.4451	27.7234	28.7116	28.5359	28.5277	27.6612	29.3186	27.8542	26.8702	28.9912	28.3822	28.1197	26.7081	28.0252	25.8135	28.2198	27.813	27.3652	28.5614	22.868	26.7038	28.6752	26.1171	27.3905	28.5597	26.9767	28.469	27.0792	26.1746	28.9804	27.9201	27.7287	22.6594	22.6733	27.7002	25.9029
18.7571	18.1556	20.2551	19.6579	22.1451	20.9676	22.3917	21.8488	22.4374	18.2915	19.7646	20.6335	18.545	23.905	18.9672	18.9356	19.0751	21.024	21.2837	20.3813	22.3838	21.4709	16.706	21.4118	24.2723	17.9523	22.024	21.3731	22.2319	21.6444	21.8522	20.5165	21.2601	22.1043	20.6082	19.8698	20.671	19.994	21.3749	21.1228	21.0963	21.0539	22.0513	19.2251	19.7642	18.7258	20.2676	21.959	21.2029	20.0185
25.0786	23.489	23.6771	25.5372	21.0717	23.7361	24.934	20.6024	25.3727	25.74	26.6715	20.5958	22.9581	21.5888	22.1776	24.8326	22.8661	25.9344	24.0835	25.3571	23.2542	23.7295	26.0581	20.7929	23.1818	22.7923	23.5889	23.4145	24.5038	22.5576	25.9073	25.2891	24.4911	22.6474	24.5368	25.092	24.468	24.3765	25.8954	22.8487	23.5346	25.4601	21.0407	25.7603	24.7472	23.9375	24.2467	22.8683	25.4786	24.5553
21.5221	19.5649	21.1273	19.673	20.2294	18.1337	23.67	21.2978	22.1	23.0401	22.4756	20.7416	20.2435	20.652	20.3049	24.458	19.4762	19.2747	19.632	20.9121	21.8113	19.2077	21.5605	23.5932	20.9097	19.9446	21.1528	20.9338	24.8354	19.2223	18.3915	23.1567	25.0929	20.3489	19.7624	20.7196	20.2427	23.341	21.8289	21.1097	20.9681	24.0828	20.6913	21.3119	23.2117	21.7966	19.6174	21.2063	20.1964	16.6732
19.1707	19.3655	20.7164	18.9558	20.376	21.8407	21.3538	20.2995	23.6593	20.0804	20.1047	23.2489	18.6286	21.0186	20.9414	19.5264	19.6718	18.4428	18.6974	17.768	19.8342	18.266	18.1562	22.25	20.8729	18.4813	20.7478	20.2526	20.3673	20.3466	20.096	20.142	21.6435	20.989	21.028	18.0134	22.1607	17.802	19.8746	20.4527	19.9552	20.0828	21.2738	20.3044	19.2544	18.5336	18.8914	20.3307	19.5645	19.1362
18.9812	17.8547	18.5116	18.3765	20.7609	18.8161	20.0177	20.6843	22.1923	19.8528	20.4725	21.6062	19.6476	20.319	18.5894	21.7233	20.0514	19.6132	18.5315	18.9755	17.8487	19.8842	20.4162	18.1872	21.8881	19.0017	24.0815	20.7204	21.5194	19.3548	21.2995	20.5779	21.4491	21.6784	20.5069	19.1136	19.4141	21.2069	19.2437	22.3819	20.0184	20.0509	21.1796	19.8491	19.7589	18.402	21.0016	20.5131	22.465	20.6546
21.7359	18.6979	22.0334	23.3705	23.4149	22.1138	21.7782	21.53	19.1745	22.6036	24.7808	20.1394	20.1785	21.3794	21.9123	21.4994	19.9958	21.5406	22.2941	23.1787	22.0654	19.923	18.6157	20.4135	23.609	19.0426	21.0203	20.1514	25.0981	20.722	23.6862	23.4808	21.6989	21.0691	22.9559	23.4469	19.9145	18.6285	21.6799	23.0318	18.4291	21.7439	21.052	21.0186	22.3518	18.6905	23.2684	21.1873	24.2242	21.1782
20.5275	18.946	21.3281	20.488	22.1913	20.9921	18.7759	22.8283	21.3584	22.5531	20.0814	21.1488	17.0302	23.6174	18.6328	20.2734	18.4496	19.1053	20.359	21.7063	21.2522	22.5296	18.6322	19.9366	21.4059	19.9197	21.1542	19.9881	20.948	20.159	18.6425	19.5148	20.0209	20.8542	20.526	20.629	20.5649	18.4291	21.5806	22.7687	22.1961	21.8519	20.1543	21.4463	18.7016	18.4018	20.0272	23.0585	19.7979	18.5686
24.3844	17.8872	22.1743	23.9961	19.3957	22.2133	21.9009	20.6662	22.2344	18.3298	24.8624	24.9311	19.4991	21.1591	23.456	24.9781	23.4095	22.1829	22.7147	20.145	23.3617	21.9774	23.0973	23.3206	21.414	22.2539	21.3497	22.0181	24.5665	20.9702	24.422	23.3382	23.6904	20.688	19.9798	23.7847	21.4567	22.0258	19.2737	22.7068	19.9415	23.0151	21.0577	24.266	24.3703	18.2181	19.7864	20.3794	23.7403	23.7872
23.8814	23.7889	24.7942	25.0349	22.32	21.6623	26.4084	22.4293	23.046	26.9998	26.0719	20.3561	22.2332	24.8855	22.7217	28.1068	20.9954	24.1377	22.9805	22.233	23.912	24.0729	16.5592	25.4404	23.8109	24.9144	22.5197	21.9234	24.3099	23.2834	25.9146	19.1007	27.0224	24.4624	23.3206	25.4904	24.8193	25.6536	27.3265	25.7317	23.6474	27.032	22.649	24.2349	27.1922	19.0599	26.5128	24.2576	24.5566	21.9807
22.9226	18.1663	21.8846	17.7857	24.1445	22.7223	23.8479	20.8296	24.413	22.8067	19.8539	19.7938	19.9356	21.5683	22.2583	22.1143	22.3949	22.1668	20.1255	20.6473	22.6856	19.548	22.311	23.8262	20.4749	22.7968	21.2886	24.0182	21.7558	24.3916	20.7592	23.121	23.8293	21.7667	20.1776	22.5057	23.401	21.6109	23.6606	23.768	22.1599	19.1421	21.5314	22.4349	19.2247	22.9056	20.1375	20.0773	24.5439	17.953
23.1519	19.1952	23.0632	20.3966	19.8889	22.5692	22.7437	20.9618	22.1307	23.1382	20.0838	20.2648	19.7072	20.6664	23.024	21.8556	23.4086	19.5813	22.6003	20.7814	21.7681	17.7023	19.6589	22.4927	20.6383	22.7689	20.665	24.167	21.5044	23.0798	23.9239	20.927	21.3745	21.1768	20.7191	20.3458	20.8292	22.1717	23.4904	22.7889	22.9007	22.7063	20.4931	22.2195	20.7286	18.4503	19.9956	23.1698	20.1749	18.1276
22.1102	18.0392	22.3378	18.4924	21.652	21.1598	21.8289	23.354	20.9079	20.553	17.9774	20.7947	19.0655	23.1245	22.1964	21.9354	22.6479	19.023	20.7531	21.8508	22.6448	18.7962	17.3354	22.1094	20.549	22.6537	20.445	22.0158	21.0571	21.3481	22.6169	19.9212	21.0752	21.4677	20.4117	18.6032	23.6478	19.4392	22.899	23.1017	22.0241	22.5963	21.4577	21.0842	19.5538	16.8789	19.8035	21.577	21.2588	19.3168
21.3987	17.6314	21.9089	19.4108	20.6835	18.7242	17.7796	22.5747	19.0232	20.6086	19.1027	22.6566	20.2419	23.6859	19.7483	17.8917	19.3936	19.016	19.4757	19.0711	17.6216	19.9613	22.3559	21.189	21.0675	18.0749	20.0213	21.4831	20.8558	19.5896	19.3931	19.6644	21.0937	20.99	19.3603	20.204	20.7384	20.0358	19.9042	20.3812	20.7316	22.805	20.185	19.2719	18.8143	17.6773	18.4517	22.7326	20.4121	20.9356
22.0396	16.8459	23.5721	19.1233	20.8696	21.4561	21.7387	22.9012	22.3082	19.8623	20.4196	22.6241	20.4184	23.4944	21.6333	22.1562	23.4008	21.7418	22.5142	22.1177	21.3944	18.2887	22.0541	22.8926	23.7185	20.987	24.6814	20.5628	21.8176	23.3261	21.4209	22.9716	19.9355	22.5721	20.7304	19.2516	23.5601	18.4335	22.5961	22.9009	23.2769	23.7205	21.197	22.259	19.813	20.9444	19.8121	20.3046	23.6003	21.6014
19.0757	17.0705	19.8991	20.6702	20.4573	18.4676	18.6287	19.4453	19.6654	18.8065	19.6249	21.6103	19.8315	23.7587	20.6663	18.4034	18.2041	21.5391	20.5078	22.512	17.1953	18.2475	18.3443	19.1893	21.0413	17.4534	20.1425	21.6171	21.3581	19.8033	19.4522	21.0463	17.3549	20.4924	19.4277	20.6766	20.0594	18.5028	18.6661	20.8623	19.3625	19.4992	21.7791	18.7448	20.7709	16.9715	18.4986	19.5571	19.8791	18.5354
23.0007	17.316	20.8627	19.2145	22.8319	22.234	17.3588	22.9769	22.3609	21.1819	19.3613	21.107	19.1015	23.6044	21.3737	21.1017	19.3346	19.5269	18.8821	20.6592	21.0716	19.8803	21.366	23.3531	21.3762	19.3196	20.2749	20.5657	21.5059	20.6468	21.8485	19.7458	23.4493	21.0371	19.6544	21.2087	21.2263	18.0182	20.1304	23.4504	20.3361	21.3704	20.654	18.827	21.325	20.1679	20.5254	22.9711	20.5989	20.6547
24.5065	27.4196	28.1354	30.3831	19.5242	28.6961	28.4922	22.0687	28.4496	29.7869	25.8688	24.0079	26.7228	21.3505	28.5411	26.4116	28.1422	26.098	29.3481	28.1279	27.161	26.2235	28.4775	29.9385	22.8773	27.9541	20.8209	23.7869	20.8751	28.3365	26.056	25.7975	28.907	26.3415	27.7431	28.9021	26.6308	28.555	27.5402	23.7525	27.6697	25.0238	27.8501	24.8639	27.3598	26.662	25.3606	21.626	22.9899	24.9299
22.6453	20.0834	22.5016	24.5216	21.2563	21.3583	25.0182	21.1182	24.1982	24.7699	24.8985	23.9555	22.7858	21.8773	18.802	25.387	24.0248	24.1522	19.4188	23.5685	23.1218	23.1218	22.0674	23.8528	21.8649	22.83	21.8745	24.5248	26.2491	20.3883	24.5345	20.5827	25.6371	24.041	24.1313	24.085	20.9839	25.7849	24.3975	24.6326	23.0965	25.2751	21.2485	24.8733	25.428	24.8755	24.674	21.2138	24.7488	22.126
19.6481	18.2434	22.2123	19.7841	22.7674	21.0428	22.0198	21.3311	21.796	18.5881	18.8657	19.2391	19.8341	22.1484	22.3824	18.169	21.5049	22.1992	22.1407	18.3988	20.8178	18.9334	19.7276	19.8125	22.9888	22.1026	21.0729	20.6112	21.7218	20.6952	19.0797	20.1402	17.779	21.4709	19.5305	19.2211	22.7244	18.0659	21.4326	20.2816	23.1612	18.7528	20.9208	20.5376	19.623	19.6264	18.4979	21.1716	20.3506	18.0785
24.4149	22.0188	23.5693	19.6559	22.6057	24.4951	24.6986	20.6121	25.2481	25.6502	22.5463	21.6097	20.6313	21.3387	23.2765	24.4902	22.3006	23.1169	23.3601	24.4964	22.274	22.817	23.6208	23.405	20.0952	23.4368	20.9913	23.1277	26.1869	22.1199	24.8875	24.8362	23.9544	21.5857	22.8394	22.8943	24.2192	22.9402	23.8366	26.0205	23.5081	23.5886	21.9333	22.8118	24.8488	23.6134	23.0441	20.2938	23.595	22.7839
20.8712	17.8891	17.6567	18.6971	20.8568	19.2503	17.4027	24.165	23.3903	19.5318	18.346	22.2054	18.8045	24.213	18.81	23.2001	20.6824	19.4651	18.4021	18.4902	17.2397	20.3502	18.7543	20.828	23.0975	17.864	25.0537	22.8123	21.6544	20.0562	20.1252	20.7556	21.0708	21.2694	20.2497	19.554	19.653	20.5475	21.4088	24.0103	18.7254	22.4607	20.5148	20.7274	19.1937	20.1881	20.8983	23.8715	21.3029	20.2571
20.2874	21.3399	21.1316	17.9578	20.3047	19.1867	19.9141	21.6858	19.6233	19.3568	21.3212	19.801	19.0759	21.3769	19.0937	18.994	20.4295	17.4994	19.0706	19.8552	19.021	19.7669	17.5602	20.0338	20.9811	17.5092	20.0748	20.9923	20.7227	18.9204	21.8727	19.7744	18.7054	21.2772	18.1383	19.7192	20.4417	18.2519	19.7379	20.738	19.5629	19.2076	20.8626	19.299	18.8706	17.8997	19.6357	21.7676	20.3854	18.979
19.6514	17.9785	18.5569	20.0025	20.8582	17.4183	20.8593	21.0099	19.2037	19.3607	19.9443	20.9185	20.0763	21.6848	19.5901	21.8724	19.4241	18.7965	19.4959	17.5327	17.9817	18.9031	19.537	18.7368	20.729	19.1642	21.5293	20.3245	20.3886	20.4004	19.5117	20.4498	21.3828	21.1354	18.901	20.3289	21.6447	18.5725	19.7689	22.0134	19.0288	19.567	19.8139	19.438	20.7486	18.0438	20.0994	24.1272	22.0029	18.501
21.6402	19.6413	20.1065	18.1231	21.6651	19.933	19.6413	21.2961	22.334	19.4215	19.1045	20.4487	18.9524	21.3025	20.925	20.5072	20.8354	17.4757	21.2507	21.2438	17.2834	19.234	16.7482	18.7531	21.4131	20.0237	21.0762	21.1292	20.5349	18.9933	19.0808	18.7708	17.3699	20.6406	20.1299	19.9827	21.2818	18.0671	18.1034	19.5555	21.4799	19.8774	20.7035	20.5714	19.8814	15.6984	19.606	20.6303	21.3165	18.8606
19.7042	19.0194	22.475	19.2369	20.3212	17.162	23.6882	23.6024	22.3403	18.9963	21.8858	21.1479	17.7921	20.9533	19.5325	22.9033	23.3015	21.693	21.8604	22.2259	17.8274	23.4187	21.409	22.9509	20.7499	22.3623	20.87	20.4466	22.3015	19.1043	19.9769	22.6148	23.4861	20.8838	21.6872	22.9114	20.0758	23.1296	22.5237	21.391	18.4116	19.8839	21.6665	19.5456	22.0444	19.5344	18.9945	20.4211	20.6482	20.2991
23.0002	20.8179	23.6845	24.8382	23.9983	23.5126	25.8018	24.2319	24.4937	25.6337	23.1124	22.9652	18.0105	24.706	23.5775	23.8715	23.4142	23.8091	22.3122	24.0455	23.3523	23.0494	20.0355	24.6115	23.4377	22.3658	23.8698	25.2599	23.7302	20.8521	26.0173	22.8238	25.3089	24.9803	22.437	22.178	22.6702	24.1155	23.8894	25.3878	23.7988	24.9382	24.2071	24.8275	22.6981	21.5818	19.1435	22.607	20.3744	21.7109
22.005	18.4191	21.485	21.1713	21.042	20.33	21.489	24.3153	23.5074	21.2401	18.2297	20.904	18.2492	22.6288	18.503	19.5212	21.0579	20.7144	19.4335	19.711	17.5782	19.1768	19.386	20.568	20.5589	18.1986	20.878	23.0483	21.0874	19.8812	22.5228	19.7659	20.8704	20.6818	19.7801	18.7989	21.8972	20.1911	22.235	19.6057	18.9709	21.2469	20.6958	23.5098	19.5014	17.8057	19.5183	21.6946	20.4938	20.2323
19.3353	18.165	21.0273	18.7202	20.3983	21.5042	22.6714	22.5185	22.186	19.0381	20.7281	20.2749	19.6876	20.9159	22.4889	21.2241	21.0306	19.9467	21.4226	22.0373	20.0636	20.0045	16.9297	22.4996	19.8905	19.9491	20.2264	20.3254	20.8763	20.5321	20.7032	19.3043	21.3779	21.1606	19.8091	19.1301	20.5407	19.0549	18.7214	19.6654	20.1393	21.6579	20.1578	19.839	19.199	18.4302	17.9391	19.6039	20.719	18.8436
21.6055	17.2261	22.5321	22.3401	20.1915	19.834	20.1452	19.5991	24.7645	21.2319	22.4269	22.6619	25.5032	22.0488	22.1222	21.9003	22.2769	23.7554	20.5634	19.6088	25.3132	21.1271	18.1532	21.5657	20.5772	22.5144	23.4925	24.1353	23.6591	23.1489	24.0427	20.752	19.1219	21.3775	22.1677	18.9905	24.3361	21.8333	24.9606	22.9078	20.4893	22.2416	20.4825	22.4811	19.9796	17.1213	21.3963	20.8733	23.9039	19.0281
21.2753	17.9562	22.6154	20.3408	19.7931	21.9658	20.7705	21.8747	22.6117	21.5588	19.9499	23.2489	20.6351	21.061	23.2667	22.1795	22.5925	22.3611	22.6518	22.3775	22.0396	21.5471	21.9111	21.6298	21.3808	22.44	23.5851	22.66	22.6645	23.7166	22.6848	22.2617	21.8094	21.5558	19.5442	19.8003	23.7371	17.9232	22.6361	23.409	22.3091	22.0731	21.3456	20.6587	19.8533	17.3154	22.2033	19.8941	23.2898	20.7766
23.1471	24.3752	21.803	21.4666	22.3875	22.3713	23.5459	21.7491	23.4538	23.7565	20.1518	23.7562	18.8064	21.4582	22.4367	25.6198	23.2627	21.5753	17.4503	21.6748	21.6007	19.6603	22.4437	22.5852	22.7743	21.9887	24.0183	22.141	25.2121	22.6864	22.6404	24.6916	23.7666	20.7827	20.2054	19.9346	23.2692	23.6047	23.3854	22.6069	23.2054	23.618	21.3865	22.831	21.9577	23.1304	25.5001	23.6644	20.628	20.8197
19.3716	17.6875	22.1218	19.3766	22.8828	20.6181	21.3842	20.1087	21.8986	20.1141	23.1345	21.853	21.725	21.2327	21.5025	22.7411	20.1582	18.8303	20.4031	20.242	20.4709	21.1039	19.4564	21.0556	23.1902	22.0248	24.278	22.1128	22.8527	22.2664	20.9417	19.8907	20.6864	20.4276	20.4	20.2824	21.5623	18.6673	22.0385	23.2712	21.9412	22.1527	21.7675	19.3677	23.3618	18.6375	19.2788	22.7183	24.084	21.6201
22.1031	20.8733	20.6347	20.8193	21.5756	21.5148	22.6863	22.5616	22.0476	21.0244	19.5956	20.7621	17.8885	21.8503	22.3376	23.1136	22.5844	18.1314	20.9175	20.4716	21.3599	18.4833	19.9424	22.3484	23.4577	22.1476	23.8133	22.4817	20.3138	21.8159	22.6018	21.1795	22.0963	20.645	20.8766	17.4231	22.7648	20.5766	22.7132	24.688	22.8714	23.0944	22.6282	21.2928	20.8407	17.7688	20.7289	21.3848	21.7781	18.5069
20.3051	17.3044	19.195	19.3457	20.0316	18.4305	19.1607	22.887	20.6381	19.4827	19.3602	20.9055	18.8933	20.4614	19.6105	18.9982	17.9838	19.6454	18.759	19.2055	18.529	19.9483	19.3658	19.539	21.3168	17.5498	20.4753	21.015	21.9202	18.4244	19.9229	20.6488	18.1246	21.4367	20.1279	18.2819	20.5188	18.567	23.2401	21.0452	19.268	23.002	19.9447	18.5573	19.6823	18.1762	24.5454	20.8038	19.6377	19.2354
22.983	22.7625	19.9408	19.6827	21.5354	19.9605	18.135	23.4613	22.7043	22.1699	21.566	19.5918	20.5101	21.4665	19.5474	22.0851	20.944	22.2425	21.5218	19.2199	23.3453	20.017	21.9629	24.2029	20.6632	22.9185	20.2686	24.4189	21.4198	19.7518	23.8506	19.8631	17.4545	21.5837	21.928	19.6654	24.4237	22.7258	24.9466	23.4682	22.57	18.9833	23.6007	21.4149	21.2744	17.2608	19.2671	19.6035	22.236	19.045
21.9952	17.4142	21.5565	19.6245	23.8363	19.972	23.571	24.1303	23.3659	20.7824	18.4902	23.4494	19.6936	22.5254	22.7315	21.6204	21.4189	17.231	20.427	20.8881	21.6337	18.5588	19.8031	23.8812	22.9083	20.692	20.3279	24.0741	21.5496	20.0628	23.6614	20.1641	23.0692	21.1625	19.5696	19.9896	21.5021	22.0474	23.7858	22.9826	19.8565	23.7348	23.6637	21.6448	18.4792	18.4971	18.9288	20.5579	23.9938	17.7055
20.8356	19.1443	21.2282	19.85	21.6568	22.426	21.7416	20.9299	21.8227	19.0392	19.1667	20.2936	19.9054	20.5109	21.0912	19.0634	19.1731	18.5516	17.4264	22.0987	18.0438	18.8126	18.3067	22.4307	20.4326	20.8452	21.2612	22.4388	21.192	20.852	18.958	20.1121	21.2739	23.6094	20.6843	19.2716	20.7574	19.1407	19.8464	21.2757	19.4888	19.8197	19.9403	19.8341	20.2181	20.9209	20.1568	21.1069	20.5103	19.5478
22.1683	21.4948	23.0169	22.0322	23.2211	22.1514	24.2763	22.7868	23.2333	22.1388	18.9177	22.1589	19.3218	24.3508	24.22	23.5844	22.4775	22.5793	22.6254	22.5803	21.9718	18.6738	22.1759	23.7633	23.7251	22.8339	20.7586	23.304	21.2009	20.5555	23.2487	22.6261	24.4157	25.2471	19.7885	21.5639	22.9023	22.4693	24.2748	21.0028	23.537	23.3399	20.9301	18.8567	22.634	21.551	24.2789	20.0458	20.3594	19.0536
21.1448	18.2127	22.0981	20.4672	23.6636	19.6828	22.752	21.1222	22.7088	22.0842	18.5627	21.1149	19.3363	24.4965	22.4052	22.4014	22.6305	20.6504	21.2922	20.5453	20.2738	19.4789	19.8914	22.0875	21.8946	20.9567	20.9807	22.265	23.1643	19.374	19.5924	23.1247	21.5447	20.1111	20.5955	21.6146	23.1221	20.5939	22.4789	20.0081	21.7618	21.9548	21.6152	23.5191	19.69	19.6829	18.4569	20.3161	19.6678	17.752
19.5132	18.9625	21.899	20.48	23.3822	17.813	20.2741	21.7383	19.4166	21.3348	20.2676	20.3815	18.8717	22.5496	20.3778	19.0239	20.314	18.985	20.2028	17.4041	20.4548	20.7173	18.2728	21.4291	20.2543	17.8236	20.0085	22.4605	20.4813	19.4053	19.9961	19.9767	22.732	21.2143	18.753	19.3043	21.313	19.0713	20.0855	20.932	19.9394	21.4285	20.4618	19.3402	18.9334	18.2619	20.3073	21.8123	21.9186	19.6504
21.0192	17.4957	18.1812	18.9952	20.5069	17.9108	17.4458	21.109	19.1918	19.9615	19.4044	20.1458	18.6105	20.5862	19.3043	18.652	19.5499	18.2677	19.9195	18.084	20.831	17.9692	18.6429	22.1754	21.9309	22.4734	20.231	24.0663	20.9163	19.1191	22.7747	20.865	17.9764	20.6853	18.9291	19.006	21.4814	18.9058	20.8161	20.1871	19.5991	18.3931	20.4907	22.2476	20.2261	19.7062	20.8809	20.511	20.8966	17.7513
24.1536	23.6181	20.9029	23.0157	20.3222	21.0942	25.0639	20.7155	25.3284	22.999	24.7691	19.6919	18.2379	23.5343	17.5391	25.172	20.7188	21.9919	20.813	22.0825	19.3192	22.9152	22.9574	21.3394	22.8294	22.024	20.3712	23.3677	25.7519	19.8334	22.7916	24.3327	24.6156	20.9563	22.7462	23.608	21.0648	23.3785	23.418	23.9339	24.6912	24.1702	23.46	23.3026	23.964	23.8136	19.1364	20.6065	19.6673	21.4765
23.3428	16.8221	22.0008	22.1744	23.068	21.1886	21.2019	20.5385	22.4132	22.2886	22.2544	22.8293	18.3447	21.1138	22.1296	23.9322	19.5634	23.4801	22.1494	22.7427	22.4699	19.3448	18.579	22.0654	22.523	21.6823	22.4515	21.8319	24.0029	22.4536	22.0651	22.8269	21.233	21.6147	22.3396	19.7505	21.3496	20.6597	23.968	20.7954	22.2227	23.1291	21.8547	22.394	20.0666	17.7305	18.1361	20.2975	21.9565	20.8629
19.7573	17.2345	18.7393	19.2536	21.8444	19.3724	21.1698	22.5469	21.7987	19.9059	19.7858	23.6128	20.0269	23.0506	20.6814	19.8068	18.9174	17.6883	18.7932	18.9677	18.2778	19.6671	21.708	19.5387	20.7787	18.8239	22.8636	20.9735	20.7562	20.0436	21.8605	21.2542	23.2142	21.513	19.1217	19.9696	20.2161	17.1431	20.793	18.9155	19.9467	23.0976	20.7015	22.4416	18.5204	18.1303	18.1295	23.1868	21.5327	19.2614
19.3726	18.7365	20.4086	20.9773	20.3675	19.8386	20.6596	21.1104	21.0228	18.9129	20.0991	19.8217	19.5213	21.428	20.7735	18.3523	18.3956	21.4728	21.238	21.242	20.9166	20.0156	19.5047	20.7482	21.0907	20.6966	21.1917	22.5247	20.5279	19.1466	21.3966	20.5519	17.7373	21.3936	19.849	20.8038	20.2706	16.8636	20.6929	20.9953	19.7994	20.1715	20.3988	20.1974	20.6567	20.7374	20.7468	19.9145	22.776	18.8788
20.1727	21.5152	21.1427	24.7194	23.7027	16.8856	23.931	19.919	21.224	19.5658	23.2829	23.9339	23.9151	22.9646	18.8643	24.114	22.6914	23.0683	21.4957	18.6911	22.7397	19.645	19.1197	21.2512	20.5783	20.1329	24.9805	22.6596	24.7946	20.3507	23.7221	24.1246	18.7704	21.064	20.2819	19.0346	22.0911	20.2396	24.3649	23.347	23.3836	24.571	21.1739	24.4296	19.149	24.2296	25.1499	24.6466	24.6699	21.1917
20.1245	19.0155	18.8355	19.9321	21.2108	20.164	17.9827	21.5196	19.9973	21.0826	18.74	22.3242	19.8501	24.209	17.5149	18.8271	17.8634	21.5338	18.1838	20.1794	21.8178	18.9858	20.5479	20.5375	22.7914	18.6425	23.2513	20.7191	20.5934	19.383	20.633	19.4812	18.5788	21.2045	19.5711	20.2896	20.4535	20.318	18.8598	22.9838	21.1703	19.1702	21.4975	20.7304	19.533	19.7296	18.9147	20.8398	20.6537	19.1872
22.2086	24.76	21.8105	20.4202	22.9941	20.3811	21.2502	23.5848	21.309	20.6293	18.1159	20.6865	19.6384	24.1903	22.617	19.1291	22.0632	20.9218	20.1414	19.9504	19.9539	18.6892	19.6727	21.4904	22.4747	21.3469	23.5748	23.3433	21.6241	21.0648	23.0421	23.0747	20.6579	20.9077	21.9253	20.0459	22.346	21.1119	21.8197	20.3804	21.1956	22.3037	21.6581	23.2968	19.81	19.6553	22.7019	20.0078	22.1252	19.3382
19.263	18.2163	18.4298	17.5255	24.2863	22.7875	17.7367	21.3003	19.3849	21.1272	21.1281	23.4859	21.759	22.2269	21.546	18.6531	18.5	20.5238	18.6035	18.7788	22.8498	19.4294	17.8033	21.825	21.9135	21.379	19.6846	21.0298	21.3143	24.7276	19.9369	20.8764	20.1223	21.5533	19.6412	21.2886	20.3535	18.3204	18.5465	20.058	24.4478	20.8074	21.3622	19.6444	19.5066	18.5817	21.0123	20.4758	20.1204	20.3601
20.542	16.2216	17.491	21.193	21.0504	18.2458	18.9438	20.7018	20.6761	19.4778	18.7388	21.9867	17.769	22.302	21.9536	18.3122	19.3273	20.5507	17.9273	21.4965	19.3645	19.6473	19.5187	21.4429	22.2754	18.707	20.8997	20.9842	21.5157	20.2547	21.4404	19.5499	18.5831	21.0706	20.9454	19.2811	20.934	16.837	20.5906	19.4696	20.1053	19.4673	22.2348	18.9608	20.8634	18.1114	19.2757	19.2535	20.3971	18.2434
20.9593	18.4743	19.8688	18.3949	22.0143	18.2942	18.7993	21.241	19.9697	20.4902	19.8897	21.2915	18.17	20.7648	18.7974	19.643	19.0683	17.0974	19.6155	18.4448	18.5988	17.6514	19.9822	17.7782	21.0181	18.2563	20.8136	19.7191	20.6419	19.2754	19.0815	21.1972	18.6497	21.4194	20.2867	20.1896	21.2797	18.2468	19.2889	21.7492	19.58	19.9046	21.5777	19.8841	18.9624	18.3165	20.079	18.8942	20.5968	18.391
25.1041	28.275	30.8638	30.6996	20.8954	28.9362	32.5964	22.8845	26.4617	25.5784	31.5497	24.8807	28.1814	25.9446	30.8656	32.3187	25.9423	24.5887	29.6759	30.2482	28.641	31.1629	31.3374	30.6776	24.5754	31.1807	24.459	24.7372	20.2406	29.8965	27.9006	29.2495	33.1591	25.8347	23.5388	27.0022	25.4403	32.135	26.5846	24.3088	27.0597	22.7631	24.9137	28.6155	26.6564	32.2023	33.2817	23.9489	25.2788	24.8983
19.8294	22.8458	20.9497	19.7955	20.591	20.7421	18.6022	20.6352	21.9164	20.5942	20.1482	23.0548	18.4227	24.0796	21.1271	19.5834	20.4617	17.8042	17.1796	19.3269	18.0928	18.7176	18.9209	19.6577	22.5261	21.3768	22.9654	22.4801	20.4863	18.9298	18.293	22.0645	18.1842	21.4255	20.4576	19.1689	23.2165	19.9276	21.9888	21.1607	21.1084	20.7663	20.6595	20.7696	19.095	19.5749	18.8198	20.0925	20.6946	18.7624
19.7531	21.8146	22.0295	20.1237	24.5918	19.1086	21.8459	23.166	22.2917	19.9812	19.4077	21.6771	22.3335	19.565	20.3187	18.5175	22.0479	18.7228	19.9958	21.5491	21.3858	19.9655	17.8877	22.2458	20.0445	21.3365	20.2722	21.8471	20.6412	22.7674	22.4249	21.5913	19.4875	20.4223	19.9868	18.8087	23.3373	19.6122	21.6634	22.8563	21.8646	19.8166	21.496	20.1351	19.4285	17.737	19.9871	22.4817	20.3781	19.1315
25.2041	22.5405	24.6553	20.3084	22.3982	23.5813	25.5826	24.0021	25.2683	24.8581	25.1018	25.0615	22.2872	25.1419	23.5931	25.0683	23.4607	23.699	23.3472	24.2316	22.9557	24.3302	23.3823	23.2198	25.3172	23.7282	23.5453	24.7934	25.3275	24.1645	24.5411	19.7807	25.026	21.7482	23.0876	22.9618	19.2298	23.9412	23.993	24.8104	23.3638	25.7649	22.3601	22.28	23.8238	21.657	24.8006	25.3877	24.7379	23.7792
23.9173	18.3147	23.3499	24.2365	22.0974	22.8566	23.5882	21.5823	23.3118	23.1782	21.3094	22.6745	21.2436	22.6594	23.0128	24.5557	23.7962	23.4869	23.0434	23.6824	22.7034	18.9627	18.1715	22.8297	22.8337	23.0911	20.5496	24.2607	24.6591	23.1675	24.0411	24.3775	23.1751	25.062	23.9664	23.6618	21.8269	24.4913	23.5075	23.7548	23.5052	24.2379	22.6064	23.6767	21.4126	18.7033	22.0147	21.0007	23.2991	17.1975
22.2458	17.8252	20.4911	20.4785	20.4621	20.7905	21.3499	20.0098	21.8852	21.8176	19.6468	20.8184	19.9016	22.5767	21.3484	18.7333	22.6959	19.4433	21.1171	21.7684	22.0334	19.866	19.0242	20.5066	22.0078	20.611	20.9438	22.6039	21.5473	22.834	21.518	19.7554	21.4367	21.7554	19.7875	18.3134	21.9503	21.0603	21.8982	19.6869	21.5344	22.1252	23.0889	19.7085	18.0231	20.7307	20.7162	19.8733	19.9859	19.962
21.1147	19.0209	19.1582	20.1012	21.9636	20.4768	21.23	23.1949	18.4294	19.9203	19.4988	20.2947	19.1246	24.4083	22.0419	20.72	19.1504	22.573	21.0572	21.7056	20.7062	18.8511	18.9169	21.3622	21.569	18.9603	20.9972	22.3393	21.0712	20.8937	21.5906	20.3869	18.23	22.2099	19.0512	18.5303	19.8455	17.5734	21.0415	22.0824	21.6709	20.4079	20.9099	20.787	19.2153	18.3353	20.0488	20.6424	20.0814	19.7161
21.1694	18.8813	21.0618	19.4299	19.986	20.1712	21.4624	23.1539	19.6336	18.2284	18.5689	22.3649	17.1851	22.6311	21.6569	19.1239	20.0497	21.304	19.7225	20.9606	21.4946	18.4931	19.4531	20.9325	21.0942	19.6921	20.6598	19.5357	21.2031	18.4546	23.0617	20.823	19.408	21.2545	19.6238	21.1488	22.5379	17.6802	22.4553	22.1728	21.8907	20.2079	20.634	21.1788	20.5059	16.846	20.2707	19.5778	20.3218	18.5135
19.627	18.556	19.9161	19.1279	20.3562	18.6767	20.1897	20.1275	20.9314	17.9832	19.0453	22.0292	19.3754	20.1245	20.8068	19.6642	20.3382	19.9824	20.8942	19.2035	21.844	17.8035	16.2733	20.2831	21.2174	20.4145	21.9048	22.5402	19.8829	18.6627	21.018	18.2369	19.0442	20.9431	19.413	19.3492	19.7289	19.2738	20.5468	21.4807	22.7781	19.7379	20.4049	19.3116	19.205	18.3448	21.5846	19.8841	20.5607	18.1783
20.1898	18.6549	19.5038	19.8817	20.22	18.6922	20.6835	20.2562	19.5826	21.0142	20.0239	19.7492	19.2202	21.0259	20.3263	19.5988	19.6636	18.5264	18.5119	18.281	19.1451	18.0006	20.3019	17.9904	20.878	18.3006	20.8036	23.1038	21.2249	21.175	21.7172	21.5134	18.4086	20.3739	19.1125	19.8366	20.8373	16.5623	22.2962	22.7544	18.6656	20.8252	21.234	19.6102	18.9039	20.9677	19.7727	23.1692	22.1407	19.3951
21.0931	18.0296	18.3294	22.3759	20.0256	17.9534	20.7974	21.8102	21.7628	21.8303	22.4654	19.9217	18.2444	22.581	20.0394	20.3992	19.548	20.3918	20.3708	22.1276	19.0817	18.2162	17.2283	19.6835	20.8864	19.4412	20.6086	22.5157	21.7681	19.4484	20.8423	19.0136	20.8818	21.2422	19.1987	19.0363	21.0697	19.8353	19.2403	22.2306	22.5893	21.9762	21.1485	19.0129	19.9967	20.234	20.5952	21.813	22.0013	17.7107
24.3769	25.6805	26.74	26.2099	24.544	27.7444	27.9821	23.6279	27.4091	25.1938	27.0982	20.3464	26.6097	25.1772	28.3076	26.9261	25.2557	26.2627	27.8089	26.8549	29.0822	25.0162	25.7645	29.604	20.7343	28.7891	21.1606	27.2382	21.1298	27.5889	28.3514	27.0196	26.1746	20.3519	20.5556	29.3019	21.9323	26.4912	27.8547	19.7922	26.6057	24.7976	26.3701	28.3167	26.464	28.827	19.2125	24.6245	26.7914	25.7793
22.2409	17.9346	21.2952	22.1277	20.0813	19.6461	18.6066	21.0315	21.6885	22.5043	19.7225	21.5041	18.7443	22.6783	18.8989	17.7829	18.6843	19.0962	19.3571	19.8663	21.0061	20.1793	21.1246	19.192	20.2035	18.4736	21.0236	21.8023	22.8481	19.916	18.0547	20.6971	21.0251	20.4489	20.1478	21.6869	23.6861	20.9609	22.1288	20.509	19.7714	22.4849	20.3864	20.8044	20.9054	19.1307	21.2149	23.597	22.1759	19.4831
22.694	18.9578	23.0378	22.5434	22.5896	22.4571	20.1455	23.6007	23.8995	23.6078	23.374	21.3073	23.2342	23.6446	22.7109	23.177	22.6611	23.1721	22.8384	22.2782	22.6936	20.8197	21.9826	22.0704	20.6162	22.9434	21.0298	23.426	24.1438	22.3156	22.9757	23.1733	22.7216	21.1358	22.1484	21.5588	22.3534	23.9368	23.0523	23.9535	23.3769	24.3712	21.3781	23.5095	24.3945	17.4082	19.5895	24.399	25.033	23.6466
20.342	18.042	20.6339	20.1035	20.9588	17.3566	18.6751	20.5565	20.2783	19.2614	19.8141	20.211	19.7712	21.2371	20.7483	17.5197	20.2391	18.9679	20.3323	17.5697	20.0234	19.0305	19.1274	21.0464	20.4643	19.4189	20.0031	20.9728	20.5319	19.1482	20.9998	20.2649	20.7762	21.5865	20.413	18.2027	21.7029	18.0454	19.2212	20.038	18.8154	18.8019	21.0713	20.749	18.4839	19.0084	19.1741	20.7367	20.1682	19.5442
19.4703	18.7039	21.2179	22.0275	23.7576	20.7699	21.4666	22.1296	21.1607	22.6064	19.2347	20.822	19.4549	20.7694	22.3022	20.7729	20.1686	21.8951	22.1064	22.0737	21.571	19.515	18.329	20.5049	23.6365	21.5331	21.36	24.37	20.8382	20.5511	19.2967	20.5581	18.7167	23.0403	22.4499	19.1152	22.0284	18.9862	20.2081	21.9398	22.4431	19.5574	21.9752	19.9473	18.9192	16.897	18.8292	21.0959	21.0983	20.1127
20.137	18.7154	20.9461	26.2007	20.4863	16.7479	18.1963	22.7167	19.9224	17.9598	21.7534	20.9479	24.4504	23.7732	18.1848	18.8917	22.3705	25.7507	18.9341	18.8095	21.0903	18.7193	19.5171	19.1006	23.2206	20.6196	20.8374	20.4916	21.3972	21.6912	25.3336	19.9088	18.2312	22.0105	21.5077	23.3631	21.321	22.4248	24.8912	21.0474	23.6471	18.1808	20.7135	24.8928	20.0758	18.576	20.0776	20.0033	20.1607	18.3839
18.6692	19.3599	21.4961	18.0712	24.6721	20.9125	18.2434	22.6692	21.9956	19.1969	20.4961	20.601	19.551	21.841	18.2819	20.8196	22.7758	20.2019	20.744	19.5369	21.8425	21.3547	22.1445	20.2583	20.2477	21.4375	21.8326	19.5182	23.524	18.3484	22.2727	20.8751	19.2409	21.6397	21.3612	20.5836	20.9264	18.5153	20.3779	22.9088	21.3663	20.6882	20.9992	19.596	20.6412	19.5415	19.9489	19.3769	19.9437	17.3862
23.4477	16.812	24.4803	23.2643	22.9792	23.1174	21.4573	20.0617	21.9362	22.3266	19.4588	20.6096	20.2357	22.2698	24.0198	25.6665	23.92	23.1872	24.4206	23.2299	23.9052	23.6639	21.0168	24.5826	23.2637	24.0816	20.8547	24.1614	23.556	22.3704	22.5369	22.8624	24.3312	21.3323	21.9254	23.149	21.928	24.1784	23.5135	24.2799	24.2252	24.673	23.3359	22.7818	23.5171	17.6751	24.4833	24.7851	21.718	18.8632
22.8469	20.1834	23.4105	23.6054	20.695	23.7794	23.762	20.6033	21.081	24.4706	22.8271	20.4542	18.943	25.0645	23.1087	24.5295	21.7428	22.9832	23.3627	24.1457	23.5439	22.5487	23.3273	23.3063	20.3098	18.7719	20.5361	23.0531	26.0435	24.9675	18.032	23.417	23.0593	22.9564	23.2033	24.3642	21.0538	23.259	23.8071	23.0915	23.9427	23.3128	24.1386	22.978	24.1796	22.6511	18.8012	23.6568	24.0504	22.8512
21.9296	18.3587	19.5943	19.1569	20.8665	19.6598	22.9029	21.0347	20.3738	20.6717	19.1466	20.3335	19.202	22.1874	22.1356	19.6382	21.6958	18.0089	21.1304	21.6188	17.9487	17.8905	18.3653	21.2106	21.288	21.6484	22.5268	20.4433	21.2736	20.3955	20.6669	20.1046	20.1005	20.5227	19.2626	19.842	20.5784	17.7266	20.7159	19.7673	19.305	18.6903	21.0589	19.7492	18.1984	18.4934	19.8326	20.3062	20.7313	19.9797
26.8914	26.7433	27.1717	27.8924	23.4872	27.6041	29.2884	24.5651	27.2115	27.5161	26.6875	24.1111	27.7502	25.8878	28.0594	28.7196	27.2455	28.0567	27.7935	27.8462	28.5167	23.9008	26.1364	28.6967	24.2939	27.4976	24.2962	28.5982	26.1072	27.1306	29.2075	27.9296	27.2624	24.294	25.7149	27.632	27.164	28.0907	28.5042	22.9978	27.3889	27.9542	26.1124	27.0235	27.3098	28.4094	27.9447	27.2556	26.9224	27.3049
24.961	23.1188	23.3581	21.8623	25.0248	24.886	26.8104	25.4605	25.7347	23.9953	21.3494	24.8895	23.4399	26.7691	26.608	24.2554	25.9002	22.0109	24.8179	24.3636	24.7714	23.595	18.0335	26.0176	24.2092	24.3978	24.813	25.8894	23.0782	26.1559	25.4279	24.3419	24.6629	21.2615	22.5645	21.4196	25.7635	23.2815	24.6808	25.1933	24.8653	24.5427	26.2624	24.1709	23.2141	24.2933	24.2042	25.3364	24.312	22.8119
21.6134	20.2036	19.1127	21.0567	20.1227	20.8716	22.1136	21.1489	19.0337	20.3949	20.0948	20.1783	18.8506	21.4655	22.7604	21.194	18.0185	19.657	22.3672	21.824	21.5312	18.7978	18.8615	21.6538	22.158	22.278	19.9535	23.2414	21.3325	22.1174	22.1652	21.4336	19.6432	21.4967	18.7343	20.7581	20.3646	17.0758	21.8522	20.2589	22.4376	19.3387	21.415	19.3165	18.1925	18.6613	21.1937	20.9523	19.641	18.1643
20.1132	20.9607	24.0719	22.2438	24.2786	28.051	24.7918	23.375	26.5641	26.1401	24.4194	24.5835	21.3874	24.7184	22.8897	26.6016	22.2295	26.7705	27.3739	23.4062	22.3427	24.1441	25.3368	24.7828	26.5671	25.4897	26.808	25.8285	25.1276	22.6632	24.205	25.5276	26.5389	21.8144	23.9869	23.9249	26.23	24.0118	27.6498	25.6137	26.6125	26.16	26.4074	22.7438	23.7058	23.6493	25.803	22.1593	23.2708	25.8537
20.6027	18.3909	23.688	22.9215	19.7811	27.4335	26.5386	24.1075	21.4362	25.7665	21.3731	21.786	22.7864	21.2227	23.5748	26.2648	20.8406	25.7007	26.9794	21.1396	21.6082	23.105	24.6051	25.1125	23.2427	25.7239	20.8422	24.6438	20.96	23.0225	24.9941	25.6301	27.1984	20.9427	23.3594	22.6157	24.5546	24.1132	27.1629	20.7017	26.0304	24.479	26.5431	22.7302	23.3705	25.3118	26.7413	22.9042	22.8822	26.3476
21.1671	17.8001	22.1832	20.4275	19.9902	17.4759	20.7875	20.8343	20.2406	19.2948	21.7459	19.9568	19.8456	20.7907	22.7788	22.4795	20.8279	17.2695	21.9129	17.7287	18.6936	20.2578	20.7388	21.9284	20.7613	22.5427	19.931	24.6746	22.4331	19.2239	22.8736	23.5983	22.5437	22.7141	19.0577	20.0344	20.8348	19.8361	22.4986	21.9775	22.4085	23.0152	21.2592	20.0381	21.4768	18.1178	19.2938	21.0119	19.9547	22.1032
26.8309	27.7858	24.4573	26.0608	20.122	24.9398	24.6105	22.5241	28.1871	27.1694	26.8607	24.4831	27.5269	20.5963	25.8705	27.6753	26.1111	26.7439	26.1951	24.5052	26.184	25.6737	27.5654	27.2093	20.994	26.068	20.8225	24.4983	27.3616	26.1587	27.5577	24.9374	26.1671	21.7427	26.6027	25.364	26.988	26.4729	27.3828	23.9046	26.4775	25.4854	26.0777	25.7562	27.0983	25.2917	27.1035	25.5406	25.5847	26.2536
25.8439	16.7202	23.4691	24.7616	20.7519	25.1664	26.8218	24.9972	23.6932	27.3639	26.6688	23.31	18.9551	24.5136	25.5702	28.3387	23.3168	23.852	22.6437	24.429	24.4566	22.5236	24.0267	26.0817	21.1852	24.5098	20.3101	26.876	29.0275	21.102	26.3476	25.2656	27.69	21.4172	19.2616	24.2816	24.2642	26.5054	27.4149	26.2056	22.7544	25.5161	21.6123	25.9655	27.506	26.9506	24.1751	26.7904	22.6098	26.741
18.4564	18.3676	20.3857	22.8112	20.8934	20.4124	19.455	20.8421	19.926	21.0419	22.1608	20.0203	19.5986	21.0814	19.7316	19.7354	19.1792	22.628	20.4346	21.7842	18.5932	18.9535	19.1052	19.1439	20.3559	19.2781	20.0303	21.5461	23.8825	20.6327	20.3981	20.538	19.1801	21.2696	22.6731	23.1543	20.8983	16.4121	21.2126	21.6231	22.0891	19.2807	22.0363	19.9213	19.519	19.7974	19.724	19.8645	20.7883	18.2075
25.5347	25.9248	23.1458	23.5141	20.4881	22.9661	26.9017	20.7011	25.0587	25.4451	23.1915	21.0201	24.7243	21.2241	25.8849	23.2841	25.5485	23.0931	22.2234	22.2056	27.507	21.3441	25.2009	25.9555	19.975	25.7309	20.7333	21.3392	23.6169	24.3031	24.7486	23.2811	24.2968	22.5083	20.2358	24.635	22.109	25.3685	26.7543	19.7626	23.5803	24.944	20.6307	25.0598	25.6376	27.0853	28.6543	19.8918	20.8279	24.9835
21.086	16.6784	20.5118	19.4064	19.4765	19.8836	17.2949	21.2907	21.0441	18.606	19.2462	20.4817	19.6099	22.6425	21.4435	17.4946	19.8602	21.7361	20.7666	20.7312	19.1676	19.5204	16.8727	20.89	23.1025	18.3018	21.1945	20.4221	21.1187	19.5821	19.3291	19.9383	18.0928	20.6824	20.4546	19.5043	21.0554	17.206	19.3499	22.6856	22.3521	18.8047	21.3832	19.7632	20.437	17.4441	19.8139	21.1782	21.1958	18.522
23.1498	26.2407	23.2563	21.1538	20.619	22.0046	23.8795	20.2091	23.4851	24.3662	19.8702	23.3235	22.741	22.525	22.0595	25.4619	21.1057	23.842	21.5637	22.9039	22.3911	23.624	19.935	24.3045	20.3552	22.6497	19.879	21.641	23.6922	21.1419	24.0701	23.4957	24.1629	21.3622	22.5416	22.5409	23.7018	24.0055	24.1911	22.3024	22.6078	22.9614	20.8494	25.0575	18.8914	18.0212	20.8486	23.6752	21.5697	23.4621
25.0278	16.8625	24.7241	21.5355	23.2538	24.2527	24.9179	24.6823	25.6229	25.185	21.8516	20.915	20.2051	23.4551	25.8732	22.5402	22.4709	22.3692	24.6886	25.0144	21.7674	23.9995	22.695	24.6984	24.5112	25.6491	21.249	20.0014	21.513	19.9212	18.7508	23.2341	26.6678	25.7595	18.2633	22.978	19.6162	24.1735	22.6944	24.2157	22.9496	26.2462	21.0461	23.6274	23.7718	22.2134	20.1156	20.5937	23.3839	22.6487
21.4545	19.7073	19.6087	23.5287	20.538	21.9195	18.4272	20.5917	24.3059	25.3377	18.1065	23.227	19.263	20.6149	17.265	18.8224	18.1673	18.5584	18.9492	18.8004	19.0981	19.1847	20.3502	20.4877	21.0575	19.2794	20.9344	22.6736	20.9674	20.1058	22.3025	21.2576	18.8077	21.4583	23.5847	24.1156	23.8017	23.4706	18.9536	21.6458	21.29	19.6751	21.0742	18.6511	18.9301	18.4315	20.6472	19.8051	19.4353	18.0703
19.5654	18.1657	20.5745	19.2929	22.5801	20.1314	18.744	22.0673	19.9608	20.098	20.4374	20.0674	24.2774	22.0648	21.127	20.4053	19.1706	19.3146	18.2255	19.9418	22.2249	19.1978	19.4611	23.2118	21.973	20.7364	20.585	20.0714	21.3617	22.761	20.1096	20.3419	22.0034	21.1353	20.0301	19.5175	20.3851	17.9147	20.4137	21.0758	21.2131	19.4626	22.1185	19.7704	20.7581	16.2814	21.2858	20.5361	19.431	19.2269
18.4361	19.0208	20.1062	18.9282	20.029	20.1781	20.9687	20.4509	22.2522	17.7188	19.5396	19.6782	21.0568	24.8358	22.1382	20.1083	21.8773	17.4348	21.23	19.6112	18.4454	18.9616	18.3395	21.9938	22.154	19.3586	20.1058	21.1172	21.3685	19.0103	17.7978	20.54	18.7113	20.8119	19.9049	19.28	21.2848	19.6524	20.6583	21.5095	18.1027	21.1276	21.8447	18.6898	19.2126	17.7572	19.1691	20.8413	20.387	19.7097
19.5093	19.8253	21.8727	24.0712	20.2898	21.5212	18.2446	20.2501	20.7067	19.0201	25.2442	19.9165	23.3236	21.4327	18.6141	18.9275	20.2393	21.2113	24.8852	18.3032	26.6067	18.1373	19.3499	20.0718	21.2152	20.9087	22.621	19.3379	20.2346	19.5972	19.0622	18.7245	19.2625	21.1938	19.1178	18.4509	20.5618	18.0171	23.9894	20.2017	18.7135	20.0521	21.8986	20.3572	19.9275	19.3548	23.4341	20.9928	21.0487	19.9494
20.7888	16.5821	18.1362	18.2261	20.8254	18.126	19.2831	20.3076	20.8401	19.8456	21.2491	20.0667	19.2943	21.8362	19.47	18.1882	18.7052	18.5489	17.6409	19.8624	17.1678	18.7783	18.2147	18.1202	22.1571	19.2206	20.8619	20.3111	21.7332	19.6099	19.8643	19.6944	19.1958	23.3586	19.521	19.0956	21.2132	18.657	18.0541	20.3054	18.1735	20.0384	20.173	19.0709	18.8069	17.7444	20.3023	20.5748	21.1098	19.2881
20.5487	19.1218	20.3949	18.4268	20.6604	18.4911	20.005	21.2143	21.1129	19.4324	19.5694	19.6268	19.9047	21.4498	20.2824	18.2887	20.165	19.7355	20.2792	18.9348	19.4406	18.5424	17.8142	19.8048	21.2994	18.7553	21.1027	20.9284	21.156	20.2519	20.7456	20.8295	17.3435	20.5691	20.3493	18.8583	20.4814	18.513	19.0013	21.0884	20.1962	19.24	21.189	20.2659	19.8457	17.3717	19.4984	20.7138	19.9347	19.508
21.4454	17.8908	21.0611	18.6464	20.7106	20.7023	19.2206	20.9418	19.138	20.8994	18.0214	20.7844	18.7199	20.7755	21.4361	19.7896	19.6518	19.6151	20.368	20.7936	16.888	18.206	17.0429	17.4626	20.7633	18.1679	20.5357	20.6194	21.1752	19.382	19.4628	19.9173	17.075	20.8492	20.1718	18.52	20.4447	17.4359	18.7414	20.0173	21.3742	19.5585	21.1457	19.943	20.4946	18.7245	19.8369	20.917	19.9626	19.8295
24.0263	17.0025	23.5202	22.0611	20.3934	23.0128	18.1024	21.119	24.708	22.0107	19.5479	20.9456	24.0232	21.3675	22.0668	17.2359	23.1768	18.032	21.8729	21.4363	24.6241	18.3024	24.1323	17.897	23.6149	24.2019	21.0213	26.2723	24.7069	23.3836	19.4772	24.1604	23.959	20.9495	19.6813	23.5079	23.9216	21.7118	25.3607	20.234	18.2578	20.6343	20.6591	23.1739	23.5886	23.0474	21.6827	20.051	21.2801	18.4593
25.1683	21.8014	25.0424	23.8776	21.6709	24.5947	23.3733	25.357	25.9233	25.8237	17.9827	22.6723	26.0092	23.1477	23.1907	22.2697	24.9954	25.333	23.9784	23.6868	26.474	22.688	25.1577	24.8429	21.4782	24.8381	20.8702	23.7839	24.2432	26.0181	25.3468	24.4858	23.5398	22.4376	19.8902	21.498	24.1335	19.2868	25.7277	23.0947	25.4775	24.7018	23.9905	24.2224	22.9579	22.8438	23.0603	21.3051	22.0296	23.8139
19.5943	19.4533	19.1167	19.9689	20.3452	19.7196	20.6231	19.9973	18.9586	19.4472	22.6333	20.4838	17.6293	20.0159	19.0569	18.6326	19.2965	18.6886	17.7578	19.7513	20.3461	19.3649	17.2634	20.158	19.6355	18.86	20.965	20.6305	23.0648	19.2051	18.2356	19.8158	21.4153	21.05	20.4093	20.1447	19.7259	18.053	19.6728	19.8004	20.2048	19.8244	20.5353	19.2703	20.0981	21.0008	22.4997	20.0269	20.6814	20.4436
18.9967	17.7994	20.3099	19.1586	20.8642	18.2199	18.8376	20.2135	21.0317	20.7551	18.1533	19.3312	20.3007	20.1451	19.6132	19.5187	21.5427	20.1316	18.7243	18.9051	20.3091	19.6618	17.5045	18.4553	20.9092	18.7667	21.0634	20.1019	20.1799	18.9774	17.6698	19.4901	20.5752	20.9653	19.6911	19.3221	19.8681	18.9023	19.6342	20.4474	20.1451	20.0047	21.6831	20.6921	21.2675	18.603	20.0098	21.166	19.8738	18.8329
21.1546	18.6997	19.1549	21.8421	20.3997	18.8067	18.7385	20.3497	18.6217	18.7404	19.3608	20.6329	18.3125	20.2864	18.3241	24.233	20.596	22.3535	18.6847	19.2293	18.3464	18.374	19.9232	17.4779	20.8189	19.3004	20.7328	21.0206	23.5943	18.6528	18.3465	18.8628	22.1861	21.435	20.2101	19.6856	20.0235	16.7911	20.4576	21.6105	18.7413	20.1216	20.5364	21.1712	22.958	22.0807	19.9446	22.1306	20.5727	22.2305
19.078	18.4195	20.9643	21.0941	21.8517	18.6746	19.3053	21.0006	18.6569	18.1693	20.1531	20.5407	22.4306	21.9925	20.0704	19.0752	20.0609	19.5375	22.6189	19.1733	23.9537	17.7826	20.4165	24.1504	20.2515	20.7564	20.4018	22.9503	21.1614	21.7712	19.2262	19.0422	20.3934	19.8074	20.2192	22.5162	23.8928	18.0423	19.2522	21.1011	22.8726	19.1022	24.061	19.6253	20.3869	16.8519	19.2119	19.8109	20.6225	18.4213
20.2911	17.3055	19.9114	18.3147	22.068	17.6868	19.2368	21.1468	20.9934	20.7695	20.8986	19.9607	17.8083	20.8199	17.7321	19.0911	19.2686	21.1972	21.7103	21.2908	21.9871	20.8277	20.0022	21.1172	20.5422	19.2358	20.7927	19.6749	20.155	22.2391	21.1965	19.2383	19.853	20.6233	18.7264	19.9842	21.9008	19.375	21.763	21.0608	18.8837	20.3263	21.431	20.2969	19.1563	17.3906	18.8878	20.5928	20.935	18.0795
25.3321	18.5954	20.2245	19.2386	25.4851	23.9739	26.0674	23.1779	22.7308	17.587	17.8935	20.2578	19.0754	25.7104	26.7294	23.2683	23.393	18.6577	22.9953	24.1137	16.8613	23.0896	18.4152	25.9635	24.8911	22.7302	20.1533	22.5093	20.5737	24.5312	18.9508	24.8134	22.3346	26.6815	20.6993	18.689	20.6106	17.4619	19.1932	20.4788	23.8026	22.0253	20.0776	19.8813	20.2773	18.8224	19.0255	20.5122	21.0902	19.3166
19.356	18.1649	19.9745	19.9743	20.7412	16.9253	17.3317	19.6826	19.2431	19.1889	19.7063	20.8681	20.6891	20.616	17.8505	21.0973	19.0309	18.9365	19.9555	19.9841	19.9553	18.3729	18.9573	19.2726	22.0301	17.1823	20.5426	19.2394	21.0411	20.2117	20.4379	20.6824	18.4745	21.0684	21.3864	18.4583	20.9601	19.2823	19.9977	21.2575	20.0451	19.4066	21.1657	19.6008	19.4918	18.7025	19.8894	19.7934	20.6621	19.1891
20.0722	17.5513	20.8443	20.1691	22.6565	18.2528	18.6735	21.2289	18.616	20.9306	19.1061	20.6801	17.5356	22.0127	20.9306	20.7508	21.8453	18.6432	20.6114	20.4217	19.6396	20.2094	20.207	19.6365	20.9554	20.3954	20.7839	22.3132	20.7568	19.4224	19.8541	19.979	20.5107	21.3393	19.9647	20.087	20.3863	18.1993	21.4821	21.6904	18.994	21.5534	20.6986	20.5721	19.1222	18.8903	20.7539	20.7287	20.8044	18.7528
22.0876	18.2758	21.6032	19.6285	19.776	19.0317	21.7489	22.9744	22.4997	18.9055	18.283	20.7373	20.3059	23.6668	22.1055	21.4202	20.6398	19.1621	19.3875	19.6469	20.5707	19.4634	18.0673	21.4918	21.0113	21.191	20.6455	19.7603	21.4542	19.7711	21.6033	20.4198	19.7966	21.0842	19.5013	18.6878	21.5921	19.8199	21.4114	23.1517	17.1995	20.3386	21.3918	20.3896	18.8152	19.5223	19.0271	20.4394	21.6472	18.0518
22.3261	17.0906	21.3604	19.6325	21.8588	20.5395	19.5681	21.301	20.9299	20.5776	19.5818	20.3759	20.005	22.3431	21.6331	20.5921	21.8841	19.2385	20.7393	20.3344	18.8124	19.7083	20.9118	20.4603	20.6577	19.6891	20.5587	22.2722	21.5505	20.0576	21.7094	21.4669	21.3674	21.7459	18.6543	19.7846	22.2866	19.3782	20.794	22.2523	20.9601	19.7418	21.1779	20.8551	20.2742	17.6004	20.3742	21.2918	22.0455	20.389
21.8521	17.622	21.4442	19.6458	22.0724	21.7784	21.3675	20.8632	23.1365	20.4302	19.9953	23.3592	19.4379	22.5433	20.2109	17.7195	20.6068	19.7795	18.4866	20.135	18.3844	19.0066	21.0149	22.0881	23.5313	20.6075	21.0395	20.4373	22.0298	21.2868	21.5466	19.6959	22.4063	22.3518	19.9464	20.031	19.7887	21.5845	19.5861	21.3105	20.8335	21.6148	21.4542	19.0978	19.9263	16.4984	18.3362	20.9906	21.0125	19.5316
21.056	17.8122	19.6119	19.4053	21.0517	19.1876	17.913	20.8882	20.5947	21.2596	20.5539	20.5298	20.177	20.0729	18.7891	17.0945	20.7554	19.485	20.942	18.4938	21.2065	17.2553	17.1402	17.6819	21.5863	21.7354	19.3737	21.6722	20.0976	22.2526	19.6921	22.0932	19.5774	20.7279	18.6216	19.3252	20.4429	19.1526	20.6354	20.1739	21.9894	17.9452	21.0066	21.6188	19.8117	16.4911	19.0469	20.1019	20.1256	19.0739
19.7137	18.2595	18.2507	18.566	20.5603	17.0955	21.7547	20.7795	23.2595	21.7565	19.0214	20.321	18.8081	20.6675	18.4953	21.6226	19.5197	19.4289	19.0614	19.9964	20.1626	19.2332	18.155	21.2729	20.8084	18.5374	20.2088	22.5464	21.6107	18.8149	19.0381	18.942	20.5142	23.4244	19.1727	17.5639	21.4956	20.0152	21.7751	20.2238	20.3316	21.6383	21.5913	19.2203	18.7903	18.1332	21.6859	21.2938	20.9336	20.4226
19.7266	18.003	23.0599	22.6599	21.4959	23.4502	24.6849	20.2536	21.1104	18.9953	19.8556	20.9123	17.9444	21.6242	22.7795	22.779	19.7229	20.9145	18.932	18.5678	23.2601	19.093	20.2278	25.3998	20.604	23.0956	20.0911	20.2254	21.2632	18.2442	19.5837	21.7677	17.0494	21.0061	18.766	19.5531	20.9639	18.1646	25.2329	20.335	19.2946	19.1689	20.7702	19.5287	20.1193	24.6567	19.9747	20.3714	21.41	18.5399
18.6179	20.5775	20.7437	22.3585	19.7294	18.243	20.4685	20.906	18.6914	19.4304	18.5637	20.3831	23.0098	21.2664	20.0759	18.8138	18.8836	19.7922	17.2184	18.8164	23.2066	18.6632	18.9633	17.5646	20.6648	18.4689	21.3577	23.4059	20.3481	19.8662	23.9747	21.0954	20.0184	20.6121	20.4587	21.9934	20.7219	21.5348	23.8303	20.5447	20.1345	18.8655	21.2192	18.2295	22.2747	21.8652	20.4091	22.2651	19.8798	17.9292
22.5378	15.6454	21.2722	18.6359	20.5649	21.6366	24.6264	21.472	22.8977	21.084	19.7589	20.7655	19.7412	22.7867	22.5194	18.5096	20.6374	21.4577	21.9899	23.1348	19.3008	19.5905	19.1772	22.0927	21.039	20.0323	20.3158	20.2925	21.1831	23.046	18.5426	20.4246	21.7557	21.0972	21.0897	18.9799	20.7313	20.9874	20.9257	20.8598	22.3835	17.7346	20.9558	22.2405	20.9195	19.3745	19.7351	20.7636	20.6806	19.0553
24.3109	16.9752	26.4945	26.835	20.0646	26.1003	29.4864	20.6301	22.1286	27.6377	19.36	26.1031	25.1947	20.9296	27.2984	28.3868	25.9846	26.755	25.9816	26.202	27.5018	21.9258	18.6024	28.586	19.9693	27.5811	26.8865	26.2325	26.9702	24.8137	28.447	22.233	23.2604	22.5439	20.538	26.24	20.561	26.9579	28.2922	20.3452	26.0768	23.2591	20.9602	27.6391	19.6116	17.4042	29.1043	20.9496	19.8618	19.3543
22.9591	18.0378	22.0844	20.2808	19.8016	21.898	24.5437	20.7697	22.1919	20.1094	18.7915	19.6723	18.7192	23.8182	23.6639	20.6177	22.7943	18.5655	18.5188	18.6805	18.071	19.3917	18.3382	23.9061	23.5759	22.5192	20.1845	22.3356	21.8081	22.3979	20.9912	20.1192	18.511	21.6061	20.0805	19.6252	19.9666	18.731	21.435	20.9189	20.1496	18.6671	21.2417	23.282	18.6802	19.6671	19.3792	20.7665	20.8197	19.8811
18.1127	18.5518	17.67	19.448	20.4625	19.4652	18.4949	20.5803	19.1212	17.7567	19.4628	21.126	19.5946	20.7748	18.5884	18.606	18.9529	18.4242	19.2817	19.4692	19.0129	18.8427	17.4163	18.0993	21.3916	19.7389	21.2262	20.7124	20.8228	19.4254	20.1207	20.1312	17.7569	21.1271	19.5724	19.7126	20.4288	19.4244	22.4984	19.5377	18.8118	20.0411	21.4127	19.3316	19.6916	17.7539	19.536	21.3495	20.5234	20.5138
20.7897	18.0679	21.0731	19.816	23.0967	17.7107	17.0292	21.1166	23.782	19.0268	18.3646	20.5661	19.3222	20.2346	19.1705	24.5039	20.6582	21.168	24.2096	19.9389	26.6273	19.0766	22.5604	24.9098	20.8438	23.6626	20.1973	20.6179	23.6057	21.1112	23.954	22.3217	17.8594	21.2085	18.8758	23.0701	23.0816	20.9442	27.6723	22.9474	17.9813	20.3469	20.6073	20.5246	24.5129	24.88	20.0553	20.0238	21.3964	23.7019
18.717	19.3233	18.0536	20.1183	20.8961	19.3802	21.2862	20.6367	18.9243	22.1286	18.857	21.6322	18.239	20.6547	19.0395	20.9088	19.1856	19.2442	17.3852	17.1538	18.5414	18.7593	18.1332	17.8543	21.8869	18.5727	20.6938	19.9112	21.3592	17.7355	17.8346	19.9163	21.6353	21.1512	19.9751	19.1604	20.2587	19.0307	20.1081	21.9321	19.2896	20.9465	20.7561	19.322	20.1689	19.1799	20.0307	20.7336	20.1778	18.4163
25.5472	24.9365	27.483	27.3423	21.3041	27.7437	27.2381	23.8763	27.7332	26.0378	24.6767	20.5847	28.0543	23.8086	25.647	25.7306	27.1299	25.1627	26.2853	25.2145	28.59	24.7635	26.8147	26.6877	24.9375	27.113	20.7171	26.2712	21.1923	27.667	27.2914	26.1406	26.9956	22.6007	20.3251	26.6292	27.4967	24.831	28.1911	26.0778	28.1223	26.9	25.7541	24.5924	25.1281	26.0613	23.4838	23.021	23.6766	21.4103
23.6298	22.9626	22.7538	18.2048	20.9473	21.6238	23.3192	20.9896	22.8968	23.6109	19.4478	19.6193	20.6082	20.2796	24.388	23.6061	23.3663	16.8371	23.2696	17.9902	23.4172	19.6577	20.6591	18.9126	18.1544	24.3608	21.1552	26.0057	21.297	24.776	19.0687	24.2315	23.3404	21.3061	19.5008	22.1358	24.3449	22.5699	23.7585	20.3503	24.232	22.714	23.7889	20.0539	20.3074	17.2517	21.1414	20.23	20.4538	18.7427
29.6908	27.6239	29.1822	30.1276	24.0856	29.0755	30.3273	24.2326	30.2609	28.6932	27.0187	25.6739	30.8867	26.8387	28.4204	28.7381	29.9592	29.5746	29.227	29.0319	31.6403	29.8617	28.304	30.4275	24.5568	30.8488	25.6979	27.3182	24.4782	27.9666	29.8625	29.7266	27.7039	24.1818	28.7127	30.0373	28.3262	30.0555	30.318	26.1797	30.7729	28.6412	29.2876	29.2308	27.7428	29.7018	27.0261	27.9009	24.4445	27.8389
26.358	17.9196	17.7221	22.9993	27.8082	23.0659	20.0828	28.4063	27.8351	25.8428	22.3419	29.6652	19.6703	29.4134	19.7435	19.2087	26.4757	20.5054	19.7064	19.3378	17.7519	18.8536	17.6009	18.7163	29.6229	17.9418	28.7511	26.8017	21.4056	25.0983	26.866	27.1181	16.7855	23.3816	25.8465	24.8346	26.1256	17.6844	24.9145	28.8957	18.4367	27.443	28.6451	26.0527	25.2031	19.0743	25.7874	29.2042	28.9555	26.6126
19.2565	17.1483	20.0995	18.5735	20.323	19.8732	19.648	22.2071	21.1297	19.0174	19.2101	22.701	19.0746	21.8427	20.0951	19.073	19.7968	17.7066	17.9878	20.5952	17.1004	19.4347	19.2999	21.7435	22.7666	20.6552	21.8351	20.6489	21.0406	19.5088	17.9928	19.7496	18.4805	21.3824	19.9872	19.0765	20.0857	19.4387	21.0581	21.7951	22.2764	19.2312	22.0339	20.5582	20.4332	19.3408	19.6653	20.4155	20.5114	19.0781
20.5793	19.0796	21.3043	21.0346	23.9131	19.2612	19.7712	21.3104	23.5218	20.1868	19.061	21.7345	18.4779	21.6355	17.3043	18.0586	20.2365	19.1076	19.6231	19.6536	22.9947	19.4448	20.578	24.4933	23.114	22.3351	21.2147	23.9475	20.675	18.6585	19.0596	19.535	22.4968	21.3391	19.1134	19.98	22.5064	17.7708	22.015	23.6459	19.4482	20.6839	20.8784	18.6555	21.0015	18.6056	20.0892	20.4421	20.8554	20.2278
19.3345	17.172	19.2685	18.8059	19.8726	21.537	22.04	20.8026	19.6171	18.5081	19.8868	23.9248	19.1824	24.1038	24.1241	19.8018	21.4923	20.8656	20.8634	24.0717	16.436	17.7737	18.3851	22.8027	23.5187	19.4242	20.7244	19.3663	21.1067	19.0941	20.1958	19.229	18.2102	23.0981	20.125	19.1714	21.181	18.061	18.5586	19.5658	18.7835	22.4196	21.1628	19.0578	19.1177	18.85	20.3466	21.1687	20.7049	17.7335
19.8216	18.0925	21.6893	19.9163	22.1377	18.3551	18.5324	22.7577	22.9361	20.1055	17.0255	19.5951	22.5746	21.748	19.8299	17.2766	21.7123	19.4359	20.6009	18.9543	22.3157	19.9823	18.7893	21.4717	19.9174	21.6204	20.8077	23.0712	20.4005	22.511	22.6879	19.3167	19.1141	21.9438	20.268	19.7558	20.5912	17.9023	19.5904	20.7764	21.9539	19.6392	21.3536	20.127	20.1262	20.2976	19.1339	19.5922	21.0459	19.2495
19.7119	18.9479	22.8371	21.6642	20.5834	20.8606	21.2058	21.7695	23.3774	24.1361	18.4599	24.7737	18.03	24.7554	22.2966	22.9476	22.7085	18.7089	22.3484	22.2237	21.8576	22.7931	21.9032	20.2974	20.8489	22.0476	20.749	22.6398	20.7172	19.9888	24.6388	22.8418	22.562	23.5369	19.7874	19.766	21.9208	18.8233	23.1273	19.8425	21.992	23.0122	21.4451	25.0314	19.4108	19.2075	19.3579	24.1488	24.6025	22.4397
20.1033	18.1493	18.3663	20.1656	19.9802	21.3324	17.7568	22.254	23.0859	20.5535	19.2423	21.1127	18.5468	22.7379	18.3145	19.4397	17.629	20.1189	20.0896	22.4488	18.7047	20.7514	17.681	20.7002	19.8938	16.902	20.9782	20.3161	20.9441	21.2612	18.5647	19.9544	18.6617	21.1276	20.0931	20.3065	20.8518	19.3716	19.6305	19.5654	21.6977	20.139	21.5365	20.1777	19.712	17.6842	19.9703	20.0506	20.0978	18.4588
20.7192	18.1949	17.76	23.3771	20.2767	18.7023	17.8623	20.8195	20.888	19.1552	19.2702	20.9487	25.4994	20.8023	18.6211	17.4514	20.9326	21.7159	18.6502	19.995	24.7619	21.5068	17.4245	18.7207	19.9979	21.9321	21.4154	19.4881	21.3792	22.1603	23.1862	20.5532	18.6779	20.3632	18.9448	23.6797	21.0659	20.2397	21.9398	20.4756	20.9942	18.5586	21.2513	21.783	18.5044	19.8902	20.5331	19.8476	22.0705	18.274
20.301	18.6198	20.8932	17.668	21.1082	20.2657	19.4369	20.5099	20.594	20.5771	19.9674	21.4136	19.1666	21.0391	24.3007	18.6298	22.8904	22.1891	21.9794	21.8411	17.2307	21.7992	17.6797	19.7211	20.7347	18.2815	20.9076	20.3091	19.5396	19.7132	20.1168	19.3818	20.991	20.7393	19.3617	21.668	20.1373	17.0964	20.493	20.9991	20.208	20.0625	20.119	19.2144	19.866	18.0995	20.2253	19.9339	20.309	19.9868
22.545	18.4888	19.8095	19.6818	20.7332	19.264	19.9491	23.1246	20.585	21.5588	20.4335	25.0187	18.9172	21.2336	20.205	22.9257	18.4121	19.7907	20.106	19.6319	18.933	18.6412	19.2903	19.7983	21.2182	19.1566	20.6973	23.6919	20.4618	19.797	21.7806	21.352	21.9559	21.0819	19.5108	21.0801	19.7109	20.1941	21.9811	19.9872	19.8992	23.1443	21.5079	18.3916	19.8079	17.6419	22.879	21.0164	20.499	18.2757
21.3213	21.3917	18.2323	19.5391	22.8468	18.6423	16.7578	19.9439	24.036	21.0778	18.6438	21.6537	21.8703	22.9933	20.9698	19.6446	20.2431	20.9056	22.6133	18.9861	21.6992	17.6931	21.8505	22.5744	20.977	21.5116	20.9857	23.4413	20.3318	19.2672	21.7971	23.0673	17.904	21.4353	21.191	19.4794	22.5349	19.9399	22.4441	21.6107	19.0953	20.0059	20.8165	18.3861	19.1558	17.2619	20.1036	19.9349	23.3471	19.6106
18.2599	18.099	21.1392	18.6419	20.5912	21.5809	21.2003	20.8073	21.6821	19.9916	19.1327	19.5395	18.7608	22.3778	22.1844	21.1078	21.0946	22.5168	21.3336	18.6955	21.1873	19.1395	18.8995	21.0309	21.9817	21.8076	20.9413	22.8064	20.9649	22.6736	19.1934	20.6305	20.4271	21.2381	19.8617	18.9577	22.6955	21.6038	21.796	20.245	21.2193	21.7582	20.4939	22.4587	18.8674	18.6373	18.3986	20.7786	20.5262	17.591
19.3618	18.6336	20.9232	19.1015	20.0262	20.7503	19.6199	19.922	19.6206	19.1247	18.4181	22.0146	19.6273	21.7063	19.3936	21.032	19.6738	19.4133	19.5066	19.4207	19.8263	21.1738	19.1734	18.7889	21.6731	18.7186	21.5602	22.8006	21.2711	19.4929	20.5751	18.8438	20.4308	20.5906	19.6605	18.0041	19.9719	18.6699	18.6792	21.6331	18.3949	20.4548	20.6807	19.6123	18.9899	18.4955	20.49	23.0392	21.2704	18.2953
23.7039	19.1377	23.5719	20.0457	23.2037	22.0547	22.6223	21.7912	22.4439	22.0627	20.2076	21.0071	16.6248	24.4256	23.453	20.0174	22.6888	22.4575	22.942	21.9303	24.2747	20.4775	21.9906	25.0041	24.931	22.3833	21.728	23.0175	20.9828	23.5585	23.8435	23.5526	22.7544	22.5089	19.5343	21.4629	23.4909	20.5329	22.4912	23.6117	23.2164	22.6628	23.8199	23.214	20.5281	20.9458	20.9006	22.1215	19.6558	19.2147
20.0083	19.6987	18.9506	19.8433	20.7728	19.5105	19.4549	20.0185	19.2922	19.3994	20.7142	20.2957	17.9178	20.0022	18.6113	18.0831	19.3147	18.4399	18.959	19.6341	17.9402	17.6564	18.3886	18.3589	21.2753	17.985	21.0772	19.9282	22.6808	20.0536	20.0062	19.3808	16.6413	21.7699	17.8114	17.9672	20.9228	18.222	18.068	20.5219	20.2481	19.686	21.1363	20.4609	18.9914	17.2311	20.4583	19.9473	21.4901	20.3204
28.7544	25.5375	30.2114	29.78	23.6483	30.2746	29.4464	24.9177	29.7193	29.493	28.407	24.4206	29.5356	24.3678	29.3689	28.3355	29.1132	28.424	29.0513	27.8728	30.8293	28.5857	29.6454	30.6274	25.0053	30.2774	24.2196	28.803	26.5536	29.4338	29.6185	28.1403	30.8692	26.6153	28.086	29.0683	28.9719	29.5745	29.9183	26.0339	28.551	27.5844	28.1831	28.6988	28.1051	29.7852	25.051	26.1264	26.0737	25.6636
26.6816	28.6937	26.8267	24.245	19.9172	26.6677	23.0709	21.5712	27.2224	25.2365	20.1877	21.1986	27.2588	21.2641	25.6114	24.022	26.1203	18.4689	25.6561	18.9635	25.0097	25.4086	26.7556	24.8049	20.5981	26.9413	20.6782	24.4856	20.8944	24.3762	26.9822	25.3888	21.375	21.1587	23.365	25.0361	24.7477	24.176	26.4227	23.1673	27.6223	25.5223	26.4639	19.3291	23.6228	22.3939	23.8686	20.5399	19.9174	21.4063
22.7415	18.0635	20.7369	20.1141	20.51	22.8252	23.9564	22.4975	19.477	21.7869	19.3879	20.6012	18.836	23.3725	23.5774	18.7776	21.5291	19.7397	19.3971	20.6631	19.7809	19.7129	18.0045	23.6695	22.5867	20.9832	24.6962	20.3893	20.4491	19.9652	19.9023	21.3711	22.0966	23.414	19.1812	20.9965	20.0204	18.2592	22.4875	23.4328	20.2746	20.4932	20.2978	18.954	20.1377	21.1828	20.873	20.9297	20.0067	19.3582
25.9344	24.6362	19.1308	19.2954	20.3799	20.9688	18.7303	21.2025	24.3134	19.0437	19.7816	19.9575	18.0862	23.5471	20.7037	23.2019	22.0188	18.7184	18.1877	20.8747	18.5391	20.4193	24.4973	19.8822	22.2877	18.4604	20.1753	20.6377	22.4437	19.546	21.811	20.1633	21.8894	20.8765	19.595	20.7461	20.3459	25.4022	21.7764	20.1749	18.7543	21.6013	20.1033	19.9143	20.17	20.8607	20.1761	20.1554	20.8708	21.811
22.5928	17.8328	22.8865	19.887	23.1664	22.7416	18.6874	23.7516	23.4109	20.497	19.6602	24.1637	18.1092	19.6567	22.0081	20.9928	23.5291	22.4887	23.1812	19.8485	22.9721	17.5719	20.8589	22.1959	23.4812	22.7297	24.9635	24.4926	21.507	23.7138	23.387	20.8756	22.9172	21.3699	18.9902	20.9068	24.1661	19.4213	22.3649	23.3589	21.5562	19.6392	22.4893	23.059	20.2213	23.5743	18.6677	22.2339	20.0195	18.6245
26.4027	27.1672	26.3905	26.8838	20.2984	27.5359	27.6822	24.3698	27.5233	26.9467	26.1111	26.5137	27.7098	23.6201	27.0455	26.1732	26.8988	25.47	26.2291	26.8014	28.2696	25.7627	26.1058	28.0495	26.4193	27.9597	21.3823	26.2107	25.8153	26.7746	26.2141	26.9258	26.1601	25.9363	24.7971	25.031	25.87	27.2434	26.8437	21.1798	26.8316	26.7378	25.021	27.647	26.6535	27.6192	22.3067	24.838	23.8213	25.2316
20.3681	18.3598	19.9001	19.8974	21.5856	21.2956	21.9778	20.8969	19.3309	19.8847	19.299	20.8082	19.0042	20.9528	22.2875	20.3038	20.3676	19.5232	21.5649	20.4076	19.716	19.8017	18.7222	21.8308	21.4627	21.6065	21.104	20.7609	21.5727	19.5733	20.2502	19.2343	18.395	21.6363	20.5048	17.8822	22.7274	17.9199	20.2475	19.2316	21.9102	19.4929	23.1674	20.3151	19.6214	17.0948	18.375	20.2536	20.6146	18.7799
21.3327	17.1313	20.1751	18.1958	20.7503	19.7795	21.6104	20.5574	21.8964	20.1464	19.7944	20.4541	19.8359	22.2039	20.4761	19.7303	19.3445	19.6385	19.7636	18.8542	17.4609	19.2896	18.8193	22.1873	22.4804	19.7763	20.1257	21.2159	21.0313	20.3005	18.8281	19.6449	23.087	20.6877	19.0087	20.1249	20.8085	18.7666	18.1229	20.0318	19.0602	19.8257	20.9572	20.5141	20.405	18.3468	20.1233	20.5789	20.1634	19.2945
21.5303	18.3759	21.5355	20.4446	19.1843	19.5028	21.0782	20.0919	21.0453	18.7034	19.7182	20.0995	19.9431	20.8609	22.1256	19.6754	23.3746	18.6048	21.4583	18.5034	19.2815	18.7208	18.8592	21.9171	23.9788	21.4084	20.331	20.9576	21.1232	21.8791	19.0756	20.4884	21.5696	24.823	19.7306	19.6098	21.8841	19.0158	19.7501	20.8979	21.9303	19.3928	21.6284	19.9651	19.3047	18.9376	19.6608	20.3304	20.833	18.9015
18.9118	22.2359	18.7811	20.6185	22.6521	17.994	22.4801	23.054	22.2684	20.2427	20.7813	20.5182	19.0594	23.1361	19.7393	18.7449	22.4006	18.2401	18.2652	17.8278	19.3139	17.941	18.2052	18.8575	20.5276	18.2553	20.2949	22.7742	21.0585	19.0728	23.2899	20.2286	18.0848	20.2706	20.4015	19.0378	21.4298	16.7328	20.5637	23.5889	18.4482	19.6123	20.3284	20.1476	19.4442	18.6791	20.6715	21.2591	20.6263	20.3707
21.1866	19.3688	22.162	19.5785	22.1713	18.2601	19.9882	20.8264	22.066	18.7792	22.0748	19.8333	19.2095	20.2835	21.3415	21.1716	21.2765	17.5378	18.526	18.0209	16.6296	19.1716	18.4668	19.2378	22.3105	18.8505	20.7568	20.0742	22.9898	18.1579	18.9403	20.3076	21.7635	20.4543	20.488	18.2535	21.5926	17.9525	20.0004	22.3088	20.2838	22.983	21.4554	21.2286	22.0981	19.2648	18.7139	20.3346	20.8932	20.8817
27.623	25.5265	26.233	26.8612	23.1455	26.0218	23.5721	25.5964	29.0069	27.6156	25.205	25.1307	27.3674	23.1593	25.5357	27.4094	28.0027	28.2009	27.6506	25.1149	29.0754	28.142	27.4192	28.5597	22.9847	27.4039	25.1657	28.2151	25.8436	28.3495	26.8532	27.4891	20.7497	23.4825	27.3392	27.093	27.2031	27.5584	27.8511	23.869	26.4766	25.9815	25.0135	26.216	26.1448	28.4634	24.087	24.7222	26.3377	22.6884
[truncated: 42 more columns]

## Sheet: B. GO terms for proteins in A.
B. 103 differentially abundant proteins analyzed for GO term enriched biological processes
Category	Term	Count	%	PValue	-LOG10, PValue	Genes	List Total	Pop Hits	Pop Total	Fold Enrichment	Bonferroni	Benjamini	FDR
GOTERM_BP_DIRECT	GO:0000302~response to reactive oxygen species	10	9.70874	1.19254e-12	11.9235	P04839, Q96HE7, P09211, P00390, P04179, P10599, P31151, P04040, P05090, Q06830	101	39	16792	42.6301	8.51438e-10	8.51438e-10	1.80311e-09
GOTERM_BP_DIRECT	GO:0006953~acute-phase response	9	8.73786	6.2869e-11	10.2016	P02763, P01009, P00738, P08697, P19652, P18510, P02743, P02741, P01011	101	39	16792	38.3671	4.48885e-08	2.24442e-08	9.50617e-08
GOTERM_BP_DIRECT	GO:0031424~keratinization	9	8.73786	3.69022e-10	9.43295	O60437, P22528, Q9UBC9, P07476, P31947, P22531, P35321, Q08188, P22735	101	48	16792	31.1733	2.63482e-07	8.78272e-08	5.57983e-07
GOTERM_BP_DIRECT	GO:0002576~platelet degranulation	10	9.70874	1.03258e-08	7.98607	P02763, P05155, P02675, P04075, P10909, P01009, P08697, P19652, P02647, P01011	101	103	16792	16.1415	7.37262e-06	1.84316e-06	1.56133e-05
GOTERM_BP_DIRECT	GO:0030216~keratinocyte differentiation	9	8.73786	1.60839e-08	7.79361	P22528, Q9UBC9, P15924, P07476, P31151, P22531, P35321, Q08188, P22735	101	76	16792	19.6884	1.14838e-05	2.29678e-06	2.43198e-05
GOTERM_BP_DIRECT	GO:0018149~peptide cross-linking	8	7.76699	1.73929e-08	7.75963	P22528, Q9UBC9, P15924, P07476, P22531, P35321, Q08188, P22735	101	50	16792	26.6012	1.24185e-05	2.06975e-06	2.62991e-05
GOTERM_BP_DIRECT	GO:0010951~negative regulation of endopeptidase activity	9	8.73786	6.16171e-07	6.2103	P48595, P30740, P05155, P01009, P08697, P04004, A8K2U0, P01011, P0C0L5	101	121	16792	12.3663	0.000439849	6.28475e-05	0.000931683
GOTERM_BP_DIRECT	GO:0008544~epidermis development	7	6.79612	1.1468e-05	4.94051	P22528, Q01469, Q9UBC9, P15924, P31151, P22531, P35321	101	85	16792	13.6918	0.00815476	0.001023	0.0173389
GOTERM_BP_DIRECT	GO:0006958~complement activation, classical pathway	7	6.79612	2.74762e-05	4.56104	P05155, A0M8Q6, P04003, P02748, P10909, P0C0L5, P01598	101	99	16792	11.7556	0.0194271	0.00217744	0.0415376
GOTERM_BP_DIRECT	GO:0098869~cellular oxidant detoxification	6	5.82524	6.03223e-05	4.21952	P22079, P09211, P00390, P10599, P00738, P04040	101	70	16792	14.2506	0.042157	0.00429788	0.091172
GOTERM_BP_DIRECT	GO:0006898~receptor-mediated endocytosis	8	7.76699	0.000122834		P07900, P04114, A0M8Q6, P00738, P04004, P02790, P02647, P01598	101	186	16792	7.15086	0.0839727	0.00794185	0.185572
GOTERM_BP_DIRECT	GO:0042744~hydrogen peroxide catabolic process	4	3.8835	0.000217039		P05164, P22079, P04040, Q06830	101	20	16792	33.2515	0.14357	0.0128322	0.327673
GOTERM_BP_DIRECT	GO:0042742~defense response to bacterium	7	6.79612	0.000228768		P05164, P22079, A0M8Q6, P12429, P00738, Q9HCY8, Q96DR5	101	145	16792	8.02622	0.150714	0.0124875	0.345353
GOTERM_BP_DIRECT	GO:0045087~innate immune response	11	10.6796	0.000242279		P61769, P04839, P05155, A0M8Q6, P04003, P02675, O75594, P10909, P31151, P02743, P0C0L5	101	430	16792	4.2531	0.158869	0.0122817	0.365715
GOTERM_BP_DIRECT	GO:0033591~response to L-ascorbic acid	3	2.91262	0.000347039		P09211, P04179, P04040	101	5	16792	99.7545	0.219507	0.0163862	0.52346
GOTERM_BP_DIRECT	GO:0007568~aging	7	6.79612	0.000457334		P30838, P05164, P05155, P13639, P04040, P05107, P05090	101	165	16792	7.05335	0.278636	0.0202063	0.689288
GOTERM_BP_DIRECT	GO:0030449~regulation of complement activation	4	3.8835	0.000740285		P04003, P02748, P04004, P0C0L5	101	30	16792	22.1677	0.410664	0.0306248	1.11352
GOTERM_BP_DIRECT	GO:0045454~cell redox homeostasis	5	4.85437	0.00114861		P04839, Q96HE7, P00390, P10599, Q06830	101	77	16792	10.7959	0.559822	0.0445641	1.72275
GOTERM_BP_DIRECT	GO:0001895~retina homeostasis	4	3.8835	0.00172551		P61769, Q96DA0, P04792, Q06830	101	40	16792	16.6257	0.708606	0.0628378	2.57753
GOTERM_BP_DIRECT	GO:0045429~positive regulation of nitric oxide biosynthetic process	4	3.8835	0.00212768		P07900, P04179, P10909, P05107	101	43	16792	15.4658	0.78146	0.0732202	3.1693
GOTERM_BP_DIRECT	GO:0019430~removal of superoxide radicals	3	2.91262	0.00222896		P05164, P04179, Q06830	101	12	16792	41.5644	0.796737	0.0730625	3.31779
GOTERM_BP_DIRECT	GO:0042493~response to drug	8	7.76699	0.00226608		P30838, P61769, P07900, P04839, P04179, P04040, P02647, P05090	101	304	16792	4.3752	0.802066	0.0709829	3.37217
GOTERM_BP_DIRECT	GO:0006629~lipid metabolic process	6	5.82524	0.00247273		Q01469, Q6UWW0, O75131, P10909, P18510, P05090	101	157	16792	6.35379	0.829277	0.0739778	3.67433
GOTERM_BP_DIRECT	GO:0051131~chaperone-mediated protein complex assembly	3	2.91262	0.00262402		P07900, P10909, P02743	101	13	16792	38.3671	0.8468	0.0751902	3.895
GOTERM_BP_DIRECT	GO:0055114~oxidation-reduction process	11	10.6796	0.00276089		P30838, P05164, P04839, P22079, Q96HE7, P00390, P04179, P10599, P52209, Q06830, P02794	101	592	16792	3.08924	0.8611	0.0759233	4.09423
GOTERM_BP_DIRECT	GO:0042542~response to hydrogen peroxide	4	3.8835	0.00346911		P13639, P04179, P00738, P04040	101	51	16792	13.0398	0.916362	0.0910206	5.11895
GOTERM_BP_DIRECT	GO:0045766~positive regulation of angiogenesis	5	4.85437	0.00494156		P04839, P36222, P12429, P05107, P04792	101	115	16792	7.22858	0.9709	0.122783	7.21679
GOTERM_BP_DIRECT	GO:0044267~cellular protein metabolic process	5	4.85437	0.00541151		P61769, P02766, P02743, P02647, P62805	101	118	16792	7.04481	0.979231	0.129222	7.87717
GOTERM_BP_DIRECT	GO:0098609~cell-cell adhesion	7	6.79612	0.00562679		O60437, P13639, P04075, P31947, Q9H4M9, Q06830, P63104	101	271	16792	4.29447	0.982206	0.129708	8.17822
GOTERM_BP_DIRECT	GO:0043066~negative regulation of apoptotic process	9	8.73786	0.00578659		P48595, P05164, P09211, P09525, P04179, P04040, P08758, P04792, P63104	101	455	16792	3.28861	0.984135	0.129007	8.40109
GOTERM_BP_DIRECT	GO:0042730~fibrinolysis	3	2.91262	0.0068491		P05155, P02675, P08697	101	21	16792	23.7511	0.992606	0.1464	9.87015
GOTERM_BP_DIRECT	GO:0001836~release of cytochrome c from mitochondria	3	2.91262	0.00818801		P04179, P10909, P31947	101	23	16792	21.6858	0.997178	0.167604	11.69
GOTERM_BP_DIRECT	GO:0019433~triglyceride catabolic process	3	2.91262	0.00963441		Q01469, P04114, P02647	101	25	16792	19.9509	0.999005	0.188981	13.6174
GOTERM_BP_DIRECT	GO:0046686~response to cadmium ion	3	2.91262	0.00963441		P61769, P04179, P04040	101	25	16792	19.9509	0.999005	0.188981	13.6174
GOTERM_BP_DIRECT	GO:0035987~endodermal cell differentiation	3	2.91262	0.0111856		P22894, P04004, P05107	101	27	16792	18.473	0.999675	0.210394	15.6408
GOTERM_BP_DIRECT	GO:0071624~positive regulation of granulocyte chemotaxis	2	1.94175	0.0118753		Q9HCY8, P31151	101	2	16792	166.257	0.999802	0.216282	16.5261
GOTERM_BP_DIRECT	GO:0048147~negative regulation of fibroblast proliferation	3	2.91262	0.014592		P09211, P04179, P02794	101	31	16792	16.0894	0.999972	0.252888	19.9297
GOTERM_BP_DIRECT	GO:0006928~movement of cell or subcellular component	4	3.8835	0.0146812		P06753, P10599, P26038, P04792	101	86	16792	7.7329	0.999974	0.248292	20.0392
GOTERM_BP_DIRECT	GO:0006956~complement activation	4	3.8835	0.015141		A0M8Q6, P10909, P0C0L5, P01598	101	87	16792	7.64402	0.999981	0.249239	20.6016
GOTERM_BP_DIRECT	GO:1900026~positive regulation of substrate adhesion-dependent cell spreading	3	2.91262	0.015505		P02675, P60903, P02647	101	32	16792	15.5866	0.999986	0.248801	21.0441
GOTERM_BP_DIRECT	GO:0032496~response to lipopolysaccharide	5	4.85437	0.0166668		P05164, P04114, P04179, Q9HCY8, P31151	101	164	16792	5.06882	0.999994	0.259188	22.4413
GOTERM_BP_DIRECT	GO:0043163~cell envelope organization	2	1.94175	0.0177605		Q08188, P22735	101	3	16792	110.838	0.999997	0.268072	23.7355
GOTERM_BP_DIRECT	GO:0007596~blood coagulation	5	4.85437	0.0242533		P02675, P01009, Q8N6Q3, P08758, Q9H4M9	101	184	16792	4.51786	1	0.341235	31.0124
GOTERM_BP_DIRECT	GO:0006954~inflammatory response	7	6.79612	0.0257326		P02763, P04839, P36222, P05107, P02741, P01011, P0C0L5	101	379	16792	3.07072	1	0.351359	32.5772
GOTERM_BP_DIRECT	GO:0051496~positive regulation of stress fiber assembly	3	2.91262	0.0259015		P60903, P08697, P02647	101	42	16792	11.8755	1	0.346786	32.7537
GOTERM_BP_DIRECT	GO:0002682~regulation of immune system process	2	1.94175	0.029427		P02763, P19652	101	5	16792	66.503	1	0.377441	36.3412
GOTERM_BP_DIRECT	GO:0050819~negative regulation of coagulation	2	1.94175	0.029427		P09525, P08758	101	5	16792	66.503	1	0.377441	36.3412
GOTERM_BP_DIRECT	GO:0014012~peripheral nervous system axon regeneration	2	1.94175	0.029427		P02647, P05090	101	5	16792	66.503	1	0.377441	36.3412
GOTERM_BP_DIRECT	GO:0030198~extracellular matrix organization	5	4.85437	0.0296644		Q96HE7, P02675, P02766, P04004, P05107	101	196	16792	4.24126	1	0.373377	36.5762
GOTERM_BP_DIRECT	GO:0031100~organ regeneration	3	2.91262	0.0319039		P09211, P12429, P02647	101	47	16792	10.6122	1	0.388944	38.7538
GOTERM_BP_DIRECT	GO:0006909~phagocytosis	3	2.91262	0.0331641		P50995, P12429, P05107	101	48	16792	10.3911	1	0.394489	39.9483
GOTERM_BP_DIRECT	GO:0071638~negative regulation of monocyte chemotactic protein-1 production	2	1.94175	0.0352087		P09211, P05090	101	6	16792	55.4191	1	0.40684	41.8401
GOTERM_BP_DIRECT	GO:0020027~hemoglobin metabolic process	2	1.94175	0.0352087		P02790, P04040	101	6	16792	55.4191	1	0.40684	41.8401
GOTERM_BP_DIRECT	GO:0086073~bundle of His cell-Purkinje myocyte adhesion involved in cell communication	2	1.94175	0.0352087		P15924, P14923	101	6	16792	55.4191	1	0.40684	41.8401
GOTERM_BP_DIRECT	GO:0050900~leukocyte migration	4	3.8835	0.0363726		P04114, P26038, Q8N6Q3, P05107	101	122	16792	5.45106	1	0.410855	42.8921
GOTERM_BP_DIRECT	GO:0006955~immune response	7	6.79612	0.0398904		P61769, O75594, P02748, P04004, P18510, P01598, P02794	101	421	16792	2.76438	1	0.434423	45.9644
GOTERM_BP_DIRECT	GO:0010886~positive regulation of cholesterol storage	2	1.94175	0.0409563		P04114, Q9H4M9	101	7	16792	47.5021	1	0.436846	46.8644
GOTERM_BP_DIRECT	GO:0006749~glutathione metabolic process	3	2.91262	0.0439177		P09211, P00390, P04179	101	56	16792	8.90665	1	0.453943	49.292
GOTERM_BP_DIRECT	GO:0010269~response to selenium ion	2	1.94175	0.04667		P04114, P04179	101	8	16792	41.5644	1	0.468443	51.4548
GOTERM_BP_DIRECT	GO:0002674~negative regulation of acute inflammatory response	2	1.94175	0.04667		P09211, P02743	101	8	16792	41.5644	1	0.468443	51.4548
GOTERM_BP_DIRECT	GO:0034115~negative regulation of heterotypic cell-cell adhesion	2	1.94175	0.04667		P18510, P02647	101	8	16792	41.5644	1	0.468443	51.4548
GOTERM_BP_DIRECT	GO:0034383~low-density lipoprotein particle clearance	2	1.94175	0.04667		P04114, Q9H4M9	101	8	16792	41.5644	1	0.468443	51.4548
GOTERM_BP_DIRECT	GO:0032872~regulation of stress-activated MAPK cascade	2	1.94175	0.04667		P09211, Q06830	101	8	16792	41.5644	1	0.468443	51.4548
GOTERM_BP_DIRECT	GO:0051289~protein homotetramerization	3	2.91262	0.0497155		P04179, P04075, P04040	101	60	16792	8.31287	1	0.484178	53.7476
GOTERM_BP_DIRECT	GO:0001523~retinoid metabolic process	3	2.91262	0.051206		P04114, P02766, P02647	101	61	16792	8.17659	1	0.488387	54.8325
GOTERM_BP_DIRECT	GO:0032930~positive regulation of superoxide anion generation	2	1.94175	0.05235		P09211, P02741	101	9	16792	36.9461	1	0.4901	55.649
GOTERM_BP_DIRECT	GO:0050665~hydrogen peroxide biosynthetic process	2	1.94175	0.05235		P04839, P04179	101	9	16792	36.9461	1	0.4901	55.649
GOTERM_BP_DIRECT	GO:0042158~lipoprotein biosynthetic process	2	1.94175	0.05235		P04114, P02647	101	9	16792	36.9461	1	0.4901	55.649
GOTERM_BP_DIRECT	GO:0042632~cholesterol homeostasis	3	2.91262	0.0557726		P04114, P02647, Q9H4M9	101	64	16792	7.79332	1	0.506617	58.0102
GOTERM_BP_DIRECT	GO:0051384~response to glucocorticoid	3	2.91262	0.0573256		P30838, P12429, P18510	101	65	16792	7.67342	1	0.510522	59.0424
GOTERM_BP_DIRECT	GO:0008228~opsonization	2	1.94175	0.0579965		P02741, P0C0L5	101	10	16792	33.2515	1	0.508838	59.481
GOTERM_BP_DIRECT	GO:0008203~cholesterol metabolic process	3	2.91262	0.0620738		P04114, P04040, P02647	101	68	16792	7.33489	1	0.52768	62.0533
GOTERM_BP_DIRECT	GO:0098911~regulation of ventricular cardiac muscle cell action potential	2	1.94175	0.0636096		P15924, P14923	101	11	16792	30.2286	1	0.530869	62.9821
GOTERM_BP_DIRECT	GO:0034374~low-density lipoprotein particle remodeling	2	1.94175	0.0636096		P05164, P04114	101	11	16792	30.2286	1	0.530869	62.9821
GOTERM_BP_DIRECT	GO:0042535~positive regulation of tumor necrosis factor biosynthetic process	2	1.94175	0.0636096		P04839, P04792	101	11	16792	30.2286	1	0.530869	62.9821
GOTERM_BP_DIRECT	GO:0048010~vascular endothelial growth factor receptor signaling pathway	3	2.91262	0.0686046		P07900, P04839, P04792	101	72	16792	6.92739	1	0.553125	65.858
GOTERM_BP_DIRECT	GO:0007010~cytoskeleton organization	4	3.8835	0.0714415		O60437, P04259, P19013, P26038	101	161	16792	4.13062	1	0.562607	67.397
GOTERM_BP_DIRECT	GO:0007584~response to nutrient	3	2.91262	0.0719516		P30838, P04839, P02647	101	74	16792	6.74017	1	0.559672	67.6668
GOTERM_BP_DIRECT	GO:0043086~negative regulation of catalytic activity	3	2.91262	0.0736447		P09525, P12429, P08758	101	75	16792	6.6503	1	0.562887	68.5473
GOTERM_BP_DIRECT	GO:0051258~protein polymerization	2	1.94175	0.0747369		P02675, P04004	101	13	16792	25.5781	1	0.562983	69.1034
GOTERM_BP_DIRECT	GO:0006508~proteolysis	7	6.79612	0.078034		O43240, P28676, Q9H4A4, P22894, A0M8Q6, P0C0L5, P01598	101	500	16792	2.3276	1	0.573905	70.7269
GOTERM_BP_DIRECT	GO:0071361~cellular response to ethanol	2	1.94175	0.0802513		P04839, P04179	101	14	16792	23.7511	1	0.57922	71.7735
GOTERM_BP_DIRECT	GO:0042554~superoxide anion generation	2	1.94175	0.0802513		P04839, P04179	101	14	16792	23.7511	1	0.57922	71.7735
GOTERM_BP_DIRECT	GO:1902176~negative regulation of oxidative stress-induced intrinsic apoptotic signaling pathway	2	1.94175	0.0802513		P04179, P04792	101	14	16792	23.7511	1	0.57922	71.7735
GOTERM_BP_DIRECT	GO:0042026~protein refolding	2	1.94175	0.0857331		P61769, P07900	101	15	16792	22.1677	1	0.599185	74.213
GOTERM_BP_DIRECT	GO:0070374~positive regulation of ERK1 and ERK2 cascade	4	3.8835	0.0866998		P02675, P36222, P08697, P31151	101	175	16792	3.80017	1	0.598286	74.6222
GOTERM_BP_DIRECT	GO:0051260~protein homooligomerization	4	3.8835	0.0889845		P27105, P04179, Q9H4M9, P08133	101	177	16792	3.75723	1	0.603146	75.5654
GOTERM_BP_DIRECT	GO:0050776~regulation of immune response	4	3.8835	0.0901364		P61769, A0M8Q6, P05107, P01598	101	178	16792	3.73612	1	0.603033	76.0284
GOTERM_BP_DIRECT	GO:0090026~positive regulation of monocyte chemotaxis	2	1.94175	0.0911827		Q9HCY8, P31151	101	16	16792	20.7822	1	0.602483	76.4418
GOTERM_BP_DIRECT	GO:0010804~negative regulation of tumor necrosis factor-mediated signaling pathway	2	1.94175	0.0911827		P09211, P02647	101	16	16792	20.7822	1	0.602483	76.4418
GOTERM_BP_DIRECT	GO:0030301~cholesterol transport	2	1.94175	0.0911827		P04114, P02647	101	16	16792	20.7822	1	0.602483	76.4418
GOTERM_BP_DIRECT	GO:0050830~defense response to Gram-positive bacterium	3	2.91262	0.0912476		P61769, O75594, P02741	101	85	16792	5.86791	1	0.597837	76.4673
GOTERM_BP_DIRECT	GO:0006457~protein folding	4	3.8835	0.0924589		P07900, Q96HE7, P10599, P02743	101	180	16792	3.69461	1	0.598057	76.9371
GOTERM_BP_DIRECT	GO:0055093~response to hyperoxia	2	1.94175	0.0966		P04179, P04040	101	17	16792	19.5597	1	0.610159	78.4781

## Sheet: C. LTBI vs. NCC
C. LTBI vs NCC groups using Welch t-tests for statistical significant analysis (PTB vs LTBI group summed analysis starting in column BX)
AKC001	AKC003	AKC005	AKC006	AKC007	ARB042	ARB044	ARB049	ARC001	ARC003	ARC010	BES009	BES011	BES015	BES016	DM010	DM022	DM024	DM047	DM048	DM050	DM051	GUBC004	LOC021	LOC003	LOC007	LOC008	LOC011	LOC017	LOC020	MKC001	MKC009	MKC011	MKC016	NPC002	NPC003	NPC005	NPC006	NPC008	NRC008	NRC011	NRC013	SH007	SH016	SO0089	SO0093	SO0095	SO0096	SO0103	SO0104
LTBI	LTBI	Ctl	LTBI	LTBI	LTBI	LTBI	Ctl	Ctl	Ctl	LTBI	LTBI	Ctl	Ctl	LTBI	Ctl	LTBI	LTBI	LTBI	LTBI	Ctl	LTBI	Ctl	Ctl	Ctl	LTBI	LTBI	LTBI	Ctl	Ctl	Ctl	Ctl	Ctl	Ctl	LTBI	LTBI	LTBI	LTBI	LTBI	Ctl	LTBI	LTBI	LTBI	Ctl	PTB	PTB	PTB	PTB	PTB	PTB
20.0784	19.3671	21.3329	20.3033	22.1047	18.2657	18.8543	21.8869	22.6231	22.1977	20.474	19.6253	20.6126	20.6682	18.8083	21.7933	20.0243	19.9169	18.8606	19.6817	19.4129	18.065	21.5646	19.122	24.4191	18.9974	21.3814	21.4868	21.7483	19.6194	22.0266	20.0173	21.8616	21.1304	20.6117	19.7296	20.641	17.215	21.3503	21.9118	19.3478	22.5322	20.8924	23.0417	20.9538	18.7258	18.8777	20.4788	21.2564	19.1484
20.3998	18.4991	21.4701	18.4609	21.7696	18.5576	20.6132	21.2546	21.254	22.1792	20.135	21.1365	19.9332	20.6799	20.1077	22.2644	20.9648	19.745	19.2033	19.951	21.1178	19.1343	20.3412	22.7484	21.2462	20.7794	20.7411	20.21	21.5388	20.13	20.5308	21.8216	20.927	20.79	19.621	19.2979	19.8922	19.7199	18.6609	19.9622	18.0491	22.6999	20.9641	19.7599	19.5739	19.4256	20.7336	20.2917	20.8106	18.2745
19.5654	18.1657	20.5745	19.2929	22.5801	20.1314	18.744	22.0673	19.9608	20.098	20.4374	20.0674	24.2774	22.0648	21.127	20.4053	19.1706	19.3146	18.2255	19.9418	22.2249	19.1978	19.4611	23.2118	21.973	20.7364	20.585	20.0714	21.3617	22.761	20.1096	20.3419	22.0034	21.1353	20.0301	19.5175	20.3851	17.9147	20.4137	21.0758	21.2131	19.4626	22.1185	19.7704	20.7581	16.2814	21.2858	20.5361	19.431	19.2269
23.0007	17.316	20.8627	19.2145	22.8319	22.234	17.3588	22.9769	22.3609	21.1819	19.3613	21.107	19.1015	23.6044	21.3737	21.1017	19.3346	19.5269	18.8821	20.6592	21.0716	19.8803	21.366	23.3531	21.3762	19.3196	20.2749	20.5657	21.5059	20.6468	21.8485	19.7458	23.4493	21.0371	19.6544	21.2087	21.2263	18.0182	20.1304	23.4504	20.3361	21.3704	20.654	18.827	21.325	20.1679	20.5254	22.9711	20.5989	20.6547
18.5691	16.9503	20.2875	20.2556	22.1233	17.2978	19.3507	23.5543	21.5089	23.0908	18.9587	23.0131	17.8937	22.5456	17.9544	19.7074	21.2915	17.8432	17.5833	18.1215	20.962	18.1033	21.4837	20.6049	20.4894	19.2552	19.996	22.7986	20.4582	18.5537	20.883	20.8048	22.0257	20.9071	19.0208	20.1198	19.792	19.1866	21.469	21.7305	17.4546	22.1618	20.7201	20.8106	17.8216	19.7379	19.3038	20.3142	20.1842	16.9732
26.0545	17.4135	23.2472	23.1107	20.2832	27.0935	28.7723	21.6674	23.724	25.2478	19.4886	20.7631	20.7848	20.5374	28.9196	23.9564	26.0719	25.3282	25.505	27.3533	24.4259	24.7734	17.4996	28.227	20.8695	26.6087	20.838	21.0376	21.5855	22.525	20.2379	18.3642	24.0259	20.9957	20.696	26.0174	21.0632	25.6371	24.5151	19.951	25.1524	23.811	24.3665	24.2826	19.2087	17.7738	20.272	20.3783	21.1143	18.9772
26.1808	25.3913	27.5345	28.1263	25.4959	27.3569	27.9946	25.0934	21.6378	28.3331	25.3637	23.0888	24.8438	26.5414	26.9212	27.9879	27.6188	28.3563	27.4379	27.8789	27.2744	28.2717	21.5401	27.3292	24.6986	27.1186	23.3606	26.5399	25.3179	25.6044	27.6672	24.1957	23.6079	20.3011	28.2925	28.2402	24.1831	26.8993	27.6785	23.5303	27.1531	27.8003	24.9337	26.891	20.1307	20.4793	28.0748	21.8878	25.2041	17.3928
19.3536	18.1501	20.1737	19.5224	20.1508	17.9148	19.1527	21.1496	20.2998	20.2301	22.2558	20.8503	18.9803	21.1036	18.0833	22.3092	19.9492	17.3829	19.1278	18.7234	18.0428	17.818	18.642	18.542	20.5792	16.7624	20.3275	20.4121	22.2536	19.8483	19.4308	20.5956	20.6862	20.7428	19.6878	18.1298	19.3307	19.0132	18.0823	21.1379	19.1609	18.5412	21.7622	19.0679	19.009	18.3674	19.6969	20.7416	20.869	19.2329
23.8319	16.5028	23.0891	20.3495	22.1759	21.5693	22.6606	22.3793	23.3046	24.3861	22.1706	20.4669	20.0231	23.2667	18.6634	24.3954	21.9368	21.211	21.8554	21.9096	24.9263	21.0277	23.0565	23.4247	24.5695	18.6951	24.6261	22.2101	22.822	22.3442	24.0878	24.1528	23.4016	23.3719	22.706	22.9153	22.79	22.5816	25.9137	24.1049	22.9549	25.9803	22.7971	21.8022	22.5071	21.9807	18.8687	23.4267	23.7403	22.1946
25.1683	21.8014	25.0424	23.8776	21.6709	24.5947	23.3733	25.357	25.9233	25.8237	17.9827	22.6723	26.0092	23.1477	23.1907	22.2697	24.9954	25.333	23.9784	23.6868	26.474	22.688	25.1577	24.8429	21.4782	24.8381	20.8702	23.7839	24.2432	26.0181	25.3468	24.4858	23.5398	22.4376	19.8902	21.498	24.1335	19.2868	25.7277	23.0947	25.4775	24.7018	23.9905	24.2224	22.9579	22.8438	23.0603	21.3051	22.0296	23.8139
22.0876	18.2758	21.6032	19.6285	19.776	19.0317	21.7489	22.9744	22.4997	18.9055	18.283	20.7373	20.3059	23.6668	22.1055	21.4202	20.6398	19.1621	19.3875	19.6469	20.5707	19.4634	18.0673	21.4918	21.0113	21.191	20.6455	19.7603	21.4542	19.7711	21.6033	20.4198	19.7966	21.0842	19.5013	18.6878	21.5921	19.8199	21.4114	23.1517	17.1995	20.3386	21.3918	20.3896	18.8152	19.5223	19.0271	20.4394	21.6472	18.0518
23.0073	17.8421	20.9379	19.2187	20.5766	20.6298	19.2761	21.6213	21.2743	22.3117	21.7209	22.5358	19.3072	22.9986	19.15	22.2433	20.2789	19.5345	17.9644	20.4579	17.5986	20.6778	23.2986	19.4416	22.3101	17.1576	20.6643	21.3655	23.73	18.5936	22.3688	21.7193	22.595	20.5996	20.0929	19.4121	21.1019	18.5431	22.2841	23.0846	21.4156	22.7947	20.8743	22.4882	22.6694	20.2633	19.2713	22.0805	24.3879	23.4188
22.9949	17.6953	23.3102	23.2961	25.5463	20.6468	22.7223	24.117	25.06	25.0121	24.1425	20.5745	28.4767	23.3111	18.8994	23.9536	23.3595	24.8141	20.4458	22.4458	26.8012	26.1004	25.9451	24.6843	21.4438	22.1555	23.0163	26.0199	23.8187	22.5305	24.7749	24.8376	23.7328	24.0536	23.2207	22.3454	24.6573	24.3877	25.7196	25.738	25.4475	26.197	22.1686	23.1148	26.7765	27.751	19.5662	21.6747	26.1802	27.6413
23.3949	17.0812	24.0418	23.8071	19.9125	21.9043	21.386	25.3669	24.9491	25.3246	23.0001	21.1414	25.582	24.6109	22.8859	24.7773	25.354	24.9618	23.6387	23.0467	25.9726	23.9451	23.5485	25.1879	23.376	23.059	22.5663	24.3928	20.2134	25.8707	23.7246	23.4826	23.6885	21.0377	23.2266	22.9931	23.5442	21.6605	25.8157	21.4452	23.4282	24.2591	22.7968	25.3197	24.1621	23.0075	20.2804	23.1472	22.4773	19.3406
20.8275	19.2992	22.037	21.2175	20.5183	19.5237	22.509	22.8655	23.2389	24.1361	23.1784	24.0155	20.201	23.135	20.1472	24.3682	22.2551	20.5214	19.7507	19.9459	21.6941	22.9463	21.5004	20.2751	20.077	17.5007	21.3691	21.0673	25.0193	18.2357	23.4178	23.385	24.673	20.7075	20.0909	19.2806	20.7568	21.557	23.2872	23.9781	20.2659	24.8098	21.2994	20.7577	24.21	22.0427	19.9304	24.6791	23.295	21.9974
21.0656	17.6858	20.4579	19.4577	21.1635	17.1583	21.5201	20.5977	22.1632	22.5402	18.5591	20.5275	18.7059	20.6613	19.5097	23.7193	20.9846	18.7697	18.5012	19.0128	17.8218	19.0731	23.8052	20.4758	20.7674	17.32	22.9106	20.3033	20.7552	19.4895	19.9441	24.409	22.8261	20.8829	19.4117	20.5012	20.5981	19.9556	21.3786	21.5285	19.2825	22.9597	21.4337	18.8496	20.772	17.1119	24.6119	20.1316	21.1912	20.2057
23.0137	18.6624	21.2448	18.1639	20.3666	18.2646	21.566	21.5428	23.4486	19.6995	19.2984	23.9481	17.6801	24.1505	21.4062	21.8163	21.8994	18.5699	21.8572	18.6983	22.8631	20.5616	22.7333	24.2846	21.3285	22.1598	21.2277	22.5211	21.664	21.3857	22.8668	22.7019	24.235	20.9627	18.3666	19.0014	23.1582	22.028	23.4829	24.3104	20.6284	24.1575	20.3202	20.8555	20.9823	19.7833	17.41	26.0604	23.4135	21.1225
21.5221	19.5649	21.1273	19.673	20.2294	18.1337	23.67	21.2978	22.1	23.0401	22.4756	20.7416	20.2435	20.652	20.3049	24.458	19.4762	19.2747	19.632	20.9121	21.8113	19.2077	21.5605	23.5932	20.9097	19.9446	21.1528	20.9338	24.8354	19.2223	18.3915	23.1567	25.0929	20.3489	19.7624	20.7196	20.2427	23.341	21.8289	21.1097	20.9681	24.0828	20.6913	21.3119	23.2117	21.7966	19.6174	21.2063	20.1964	16.6732
22.2411	18.5887	22.4106	20.1383	21.6855	21.1717	20.61	25.647	22.7748	22.2691	18.6261	22.6987	18.8945	25.197	20.4261	19.3618	20.7662	21.343	18.5248	20.4792	19.4958	20.7857	18.3582	22.0434	23.5517	21.661	20.7562	22.8075	21.8835	21.1789	23.4964	23.099	20.3465	21.7356	20.8658	19.3916	20.4566	19.2162	21.1596	25.4781	22.8316	24.0527	20.6175	21.838	20.0475	18.6198	19.8638	22.0845	20.3615	18.231
20.342	18.042	20.6339	20.1035	20.9588	17.3566	18.6751	20.5565	20.2783	19.2614	19.8141	20.211	19.7712	21.2371	20.7483	17.5197	20.2391	18.9679	20.3323	17.5697	20.0234	19.0305	19.1274	21.0464	20.4643	19.4189	20.0031	20.9728	20.5319	19.1482	20.9998	20.2649	20.7762	21.5865	20.413	18.2027	21.7029	18.0454	19.2212	20.038	18.8154	18.8019	21.0713	20.749	18.4839	19.0084	19.1741	20.7367	20.1682	19.5442
19.356	18.1649	19.9745	19.9743	20.7412	16.9253	17.3317	19.6826	19.2431	19.1889	19.7063	20.8681	20.6891	20.616	17.8505	21.0973	19.0309	18.9365	19.9555	19.9841	19.9553	18.3729	18.9573	19.2726	22.0301	17.1823	20.5426	19.2394	21.0411	20.2117	20.4379	20.6824	18.4745	21.0684	21.3864	18.4583	20.9601	19.2823	19.9977	21.2575	20.0451	19.4066	21.1657	19.6008	19.4918	18.7025	19.8894	19.7934	20.6621	19.1891
18.8039	17.2575	19.06	21.0346	20.0019	20.7073	17.5066	20.2255	22.3967	18.3837	18.5193	19.9298	18.1923	20.2527	18.9773	17.9496	18.5915	17.9059	17.8604	18.1818	20.8512	18.1648	17.4471	22.2987	20.2212	19.5707	20.2434	19.8352	20.5	18.6131	18.4439	19.1915	17.5136	20.6571	19.0758	18.4786	19.9865	17.3201	18.8652	21.1056	20.2901	17.5175	21.8974	20.1415	20.8153	22.2284	21.0766	21.2185	21.3213	20.8471
20.2247	19.6986	17.8135	21.9478	20.9444	17.5807	22.7807	21.1995	20.6129	20.0215	20.2414	21.0037	19.9994	21.322	22.0665	22.7217	20.0882	19.5677	19.5371	19.7804	17.345	19.7966	21.8681	17.6251	21.272	21.6339	21.2459	21.0599	23.1869	20.1877	20.0352	23.9356	19.3066	23.5864	22.6524	21.7736	21.1631	23.0897	18.2191	22.4364	19.436	20.4091	21.2245	22.2387	22.8857	25.1739	26.0321	20.5839	20.6714	20.9821
25.9274	19.1161	24.4106	18.594	22.3807	25.6409	26.2791	25.0154	25.8127	25.9171	19.8956	23.9722	20.5884	25.6759	25.8519	22.4297	24.222	23.6587	24.8056	25.0307	21.0435	22.3465	23.5514	25.8764	25.2041	24.8611	20.0777	24.5984	21.6072	25.4332	19.8368	22.1461	26.4973	24.1312	21.2468	23.4604	24.322	20.0238	24.4738	25.4975	25.2472	25.4702	19.6635	23.9689	24.004	18.9631	20.0633	22.8521	21.6398	20.1964
25.0201	25.9867	22.9173	23.2942	19.8461	23.4525	26.1218	20.0645	24.4595	24.7027	18.2347	19.7523	22.9971	20.0759	25.1165	23.917	23.9066	23.0012	21.5359	22.5121	24.6571	22.0082	25.1064	26.5136	20.0475	25.058	20.2055	19.6328	20.317	23.1023	22.3422	25.1254	24.6696	21.6367	25.4772	25.6913	21.7063	24.4521	25.9287	20.5004	23.9464	24.8279	20.9386	23.7467	24.8941	26.7273	28.9229	19.1116	19.1636	25.3271
21.3539	20.8148	21.9829	22.2607	19.9663	19.2924	21.8778	22.1461	22.6386	18.1131	18.4543	19.8892	20.0224	21.8431	21.7947	22.0073	20.6121	17.6312	21.8459	17.9176	22.6972	17.8951	19.2722	21.6232	23.4293	21.9997	20.4992	22.92	22.1331	18.3529	23.3366	23.1241	21.749	20.4952	20.5334	21.0778	23.7466	22.8546	22.6107	24.1457	22.3967	22.4105	23.1331	22.2968	19.9135	21.9603	17.7127	24.0812	20.3953	20.3066
22.32	20.7939	22.3869	22.7116	23.0829	21.9255	21.2173	20.1888	25.1807	22.1669	21.4147	23.379	23.0497	23.0935	23.202	21.5163	22.3909	23.3172	21.4735	21.3938	24.6782	22.5182	22.8902	21.4646	20.1816	22.724	22.6276	21.7297	24.2007	22.3688	21.7773	21.7735	21.6854	20.6202	18.8348	21.1056	22.8623	22.1434	23.5299	23.0272	24.4863	21.7656	22.1848	21.8382	20.9654	21.3297	19.6328	21.5306	21.905	19.3025
20.6796	17.1874	22.0761	23.3342	20.2424	21.8047	20.8946	20.4741	21.9992	22.4838	18.0944	20.2038	18.1242	20.2123	21.0686	17.6591	21.9654	22.95	22.5418	23.146	22.5174	21.6061	17.1454	20.6038	22.7603	20.5265	20.5589	19.789	20.7826	19.0149	22.3531	20.6759	21.3219	20.4154	19.4477	23.1208	19.9421	20.2333	21.7164	19.0963	22.7861	22.3686	21.1036	19.977	19.5304	18.6216	19.8812	20.1082	21.5305	18.8759
18.7503	17.7318	20.1693	18.3194	19.7693	20.0701	20.5373	21.3264	21.5509	18.322	19.0612	19.6648	18.6535	22.2515	19.6523	20.4211	18.3442	18.3299	17.7972	18.5898	18.7123	18.5812	17.3782	19.8909	19.9619	19.4356	20.6881	20.1477	20.2268	20.7041	18.1809	18.9462	17.2172	20.9654	18.7161	18.2074	20.2867	17.0117	19.926	20.2432	22.5025	20.5255	21.7998	18.0432	19.2376	16.0319	20.9295	20.4698	20.5546	18.5498
19.1665	19.8026	21.3468	18.5314	24.096	20.0499	17.2018	19.9852	22.6577	22.5067	19.2832	20.2677	17.7465	20.5255	21.4346	17.8833	21.2385	22.8751	18.2883	22.2666	19.9698	17.7622	17.9128	19.4618	20.5519	17.607	21.1885	19.533	20.8484	18.2246	18.3839	19.1356	17.4459	21.0917	19.5345	18.4167	21.3373	17.2497	17.9369	21.2933	22.6335	22.7672	20.784	19.6228	19.7514	18.1473	19.4	21.1264	21.227	19.122
18.4534	16.7989	21.9566	19.018	20.2985	22.1185	18.1691	21.2015	23.274	18.8017	20.1428	20.4062	18.761	19.9888	22.5444	18.3982	18.5351	17.4958	17.4467	17.7874	19.9246	18.6783	21.6001	21.591	20.6874	19.9187	20.6265	22.9866	20.9912	20.6089	18.85	19.5703	20.0898	21.5806	19.7224	18.8974	23.3784	17.7964	21.4053	20.0467	22.2125	19.5599	21.9421	19.3521	20.6844	20.319	19.6486	20.1684	20.2459	20.1608
19.251	17.8424	19.4356	18.1841	20.42	17.5161	22.7887	21.1238	22.538	17.9797	19.1774	20.9423	18.994	20.5892	21.1804	21.5042	18.9735	18.4288	18.3881	18.6849	20.2128	18.8887	16.9967	21.5092	21.2119	21.4555	20.7645	22.0885	21.2661	19.1086	20.9714	18.8253	17.9711	21.0315	20.45	18.0737	23.7427	20.0652	22.1141	21.0698	19.0731	17.5897	22.7326	19.8272	19.3232	20.9814	19.8082	22.6817	20.4054	18.6452
23.1173	18.082	17.5454	19.1169	20.8905	21.7917	21.4682	20.532	18.74	18.8991	19.4144	20.3402	19.896	20.727	23.6014	17.5159	22.5619	20.4017	21.8538	18.891	19.2135	19.7032	18.0214	24.5354	21.7014	22.7546	21.4789	22.8216	21.5439	19.3116	21.4601	19.6586	21.6002	21.1663	19.6328	18.995	19.6962	16.8596	22.6487	20.3916	20.9241	19.199	22.4162	20.6896	19.5445	17.7848	18.6929	20.3241	20.5077	18.8915
19.7918	19.0097	17.7523	19.3311	20.3621	18.0175	20.0325	20.6576	20.0606	19.9009	20.6416	24.0545	18.8829	21.5605	17.6738	20.7194	18.2222	18.6431	18.6042	19.6889	17.0362	19.5961	21.2985	17.3215	22.9948	19.343	22.2836	20.2206	20.9232	20.0976	18.0513	19.85	20.8513	21.8644	19.8334	19.2066	20.3567	17.9075	20.4079	23.2553	18.7958	21.5522	20.9491	19.4313	19.6865	18.4209	18.7834	22.9957	23.4008	19.3893
23.6495	17.9678	22.6101	21.5088	23.096	22.1226	22.2913	22.1447	22.6835	23.584	19.4778	23.2019	19.1316	25.1405	21.8312	22.8864	21.1671	19.4726	22.1297	23.2754	20.0614	18.7884	22.0714	22.7162	21.6978	21.2753	23.3058	21.9985	21.0755	19.9079	22.9419	22.4073	23.2396	24.6511	21.5357	21.7232	20.5084	18.1481	22.1103	22.7911	23.3537	22.6883	21.0551	22.0911	18.694	19.5758	23.0408	20.4241	23.5667	19.0496
23.3092	18.2236	21.3876	20.1604	23.0418	22.2434	17.437	21.1438	21.6126	19.1103	18.9161	20.488	20.4194	21.2608	21.3125	23.2476	22.4358	18.541	19.4412	18.7928	20.4954	19.013	18.2567	20.972	23.6944	22.2107	20.8014	20.3785	21.8645	19.2149	18.9446	23.6434	20.0542	21.2023	20.8722	20.0258	21.0957	19.0798	20.9501	21.0178	22.5895	24.3079	20.3145	19.6358	18.7745	17.8908	20.3116	19.7256	19.7924	17.9445
22.9034	19.548	19.8445	19.229	22.9438	23.2893	22.2712	23.364	22.7374	22.7966	19.0087	23.4199	19.1981	25.4408	24.2437	18.5028	22.2356	21.2953	23.6537	24.1615	17.2745	22.3874	19.1677	24.7136	23.485	20.6964	20.4744	20.9898	21.1163	19.4316	19.1498	20.5909	20.7649	23.8881	19.8871	19.1058	20.4361	18.0334	20.8637	22.7834	23.0581	21.9697	20.3746	19.7671	20.1345	18.1647	20.3783	19.7823	19.8505	18.0342
25.9597	24.5647	26.6063	27.9799	20.4918	26.8721	28.6089	21.9962	24.3892	27.3551	20.8963	21.2533	25.7724	17.0059	26.7687	27.8495	27.132	27.2348	26.8641	27.1738	27.0756	24.5268	19.356	26.9786	20.6228	26.7772	25.8855	22.3594	26.9591	25.3463	28.6061	25.984	24.6035	24.2816	26.2304	27.3988	25.5019	27.903	28.0714	27.0266	27.1331	26.6489	26.9869	28.4755	20.1939	21.0526	28.5033	20.7394	24.1366	19.5485
22.4065	18.292	22.0303	20.6627	22.8232	20.1444	20.9302	22.2198	19.7951	19.1578	21.5543	23.535	18.6088	22.2042	21.6562	23.0981	22.3111	20.0878	21.45	20.9313	20.5928	20.1758	18.1446	21.6473	23.2699	22.0479	23.2874	22.5721	23.2111	20.5536	22.5862	20.7325	21.2485	23.469	22.3107	19.3317	23.1072	21.556	22.285	21.8688	20.3428	22.9489	21.3894	21.3058	19.2709	18.3405	19.3412	20.7812	23.3534	19.6146
21.6368	24.6497	22.7831	20.6417	20.5265	18.1193	23.3105	20.7318	21.5816	19.9277	18.5734	20.1773	18.2341	24.7771	21.7166	18.7294	22.9107	19.9539	18.732	20.1519	21.0428	18.5409	22.0893	23.3558	21.5162	21.9659	20.5283	23.3797	20.8147	18.976	23.5079	19.7588	17.0712	22.7512	19.4901	19.3921	22.21	21.0197	22.4936	21.6171	20.1662	21.8885	24.1416	23.3665	21.9854	17.2115	23.4731	23.3033	20.8307	18.5869
22.1697	17.7857	19.2696	19.5188	22.7207	18.34	21.1074	23.1824	21.3446	21.8606	18.8117	21.8623	18.2492	24.5702	17.8904	22.3679	19.0625	21.2887	19.9268	19.0716	16.884	18.6286	21.7089	17.5558	22.0195	17.5415	23.8968	21.6294	20.5256	19.0606	22.0286	22.8736	21.9302	20.9355	19.1095	18.8568	21.4365	18.2903	22.4538	21.6001	18.8769	22.9337	20.745	22.2794	20.4048	19.3165	21.0279	22.4644	20.8735	20.2583
23.8168	17.3005	21.8505	26.2046	21.5005	23.1863	24.439	21.4259	25.3859	25.1926	19.6656	20.235	18.4992	20.8085	24.4782	19.6068	21.5231	18.8308	22.8285	21.8616	17.933	18.2026	18.3957	28.2605	20.8061	23.437	20.2666	25.0488	20.5348	18.6496	19.052	19.9631	18.0778	20.6798	19.1216	25.0504	22.2004	19.6203	18.1547	20.1042	19.0864	18.9232	21.8651	24.9879	19.0234	18.8951	20.6153	21.188	20.2082	19.8494
19.4342	23.4684	18.2274	18.9769	23.6433	19.1944	22.9083	20.7676	22.5782	21.7442	18.982	19.9546	19.3952	21.5705	18.3877	23.2618	19.2555	18.2888	18.7937	18.5502	18.1739	18.2162	21.0048	18.0938	20.4634	18.05	20.2749	20.4718	20.688	18.6626	19.271	24.4976	21.9135	20.6879	19.3233	18.945	20.6414	21.8822	22.1701	20.2527	19.2209	21.1727	21.5911	22.4438	23.1445	21.3315	24.0876	20.9296	21.2901	18.3114
20.1434	17.316	17.4132	19.0663	20.2191	18.2348	17.9772	20.45	20.2163	21.0494	22.4871	19.9635	18.6779	20.8479	17.5355	20.7004	20.0025	18.3782	18.2468	18.6362	19.1065	18.4419	19.6963	17.1719	20.5199	17.1786	20.4136	21.3445	21.237	18.8805	20.0457	21.0208	20.9182	20.8235	20.0461	18.5166	20.2576	18.359	20.7185	20.348	18.2809	19.7399	20.5603	18.9241	18.7933	18.9686	19.0632	22.9959	22.6918	18.0551
19.3469	17.5731	19.7652	26.6085	20.2698	18.4704	21.5797	20.5023	21.5063	24.689	20.11	20.1121	19.8616	20.4991	18.4887	18.6214	21.7293	17.9443	23.2737	21.5085	18.0591	19.251	18.4629	28.3674	20.2455	21.1969	20.9107	24.2673	20.7975	19.6613	20.405	20.0177	18.3089	21.3092	19.4674	23.866	20.3209	20.0825	18.6546	19.6818	22.0179	19.4072	24.1025	22.4012	19.3239	17.826	18.8046	19.9575	21.0254	18.6459
24.6625	23.8105	23.5608	24.056	24.72	23.1238	25.0981	24.7645	23.1313	24.2706	23.3502	24.5711	22.0385	25.5449	24.7015	23.5513	22.8106	22.0203	23.0123	23.7293	22.5981	22.3178	17.8676	24.4406	26.5987	22.8789	20.5127	20.5169	21.5228	22.5354	24.5174	24.5315	23.7346	23.8247	23.517	22.9556	20.0137	21.8678	25.0818	25.9055	23.9083	26.037	20.3886	20.1813	19.5898	19.6842	23.8047	24.5006	20.0299	24.0758
20.555	18.4947	22.3328	18.6325	23.9537	21.8371	17.0516	20.248	21.8348	19.0096	20.523	22.9405	21.1269	22.414	18.7076	18.8633	20.5108	21.6836	22.144	18.2188	22.995	18.6033	17.9658	22.1637	22.0953	21.968	21.1358	23.3778	21.7883	22.8872	22.7509	19.5336	19.2039	20.9203	20.4222	18.5302	23.2259	19.5898	20.607	19.7359	22.9078	20.2859	20.7845	20.2362	20.0188	19.2297	19.4007	19.7955	19.864	18.942
22.0679	23.0832	18.3239	18.6463	21.7591	19.6902	22.0171	20.2561	23.4216	19.235	18.7486	20.6447	20.2949	22.7631	19.1191	23.0439	19.1635	17.9581	18.337	18.2321	18.3162	19.6721	22.3011	20.2774	22.7984	19.3961	21.1695	23.2313	24.0609	19.0362	22.2319	22.5161	22.5539	21.562	20.7718	18.7573	23.1492	21.3519	22.5422	20.6487	18.3572	21.9942	20.9829	23.3645	23.073	22.2325	24.3007	20.1689	20.2464	19.4197
19.5424	17.7569	21.7473	18.8762	20.0237	19.4619	21.2595	22.2384	21.088	21.1775	19.1761	20.2183	18.433	20.5566	19.5551	20.1159	20.8438	18.1881	17.8992	18.4533	21.0489	20.0634	17.4893	21.654	20.2543	20.0111	21.4098	20.1174	20.6475	20.0676	21.4319	19.6134	21.6336	21.7969	19.2699	19.5711	20.0235	18.6852	22.149	20.6885	20.8757	21.761	21.3031	19.3829	20.5354	17.5197	19.6995	20.356	20.438	19.9949
24.8016	21.6375	24.7754	24.4188	24.3557	22.4654	22.1081	22.504	26.4647	24.7195	22.9712	24.1077	25.6619	24.9379	21.9458	24.6428	23.8617	24.7344	24.419	23.2461	25.0655	24.3412	25.321	24.8935	24.5682	23.7977	25.3418	25.3566	23.2886	24.0663	25.7284	24.7908	23.4296	23.9229	24.9231	23.9025	26.141	25.1654	26.5926	25.507	24.6596	25.8931	23.2703	25.0401	25.4239	25.8154	27.1386	24.0808	26.1557	27.3438
20.5549	19.2804	19.4576	19.7	21.1355	18.5334	18.0869	20.3909	18.496	18.9679	18.8601	20.9218	18.8815	20.2774	18.6033	21.0671	19.3695	19.0121	17.9132	19.246	19.6477	18.3821	17.5045	18.2031	20.3996	18.1533	20.4788	20.1833	21.6645	20.4451	19.3296	19.2259	18.1988	20.7876	19.6317	18.9196	20.1863	17.7503	19.2975	22.051	21.2624	21.9064	21.6886	20.7705	20.1813	17.2348	20.1816	23.1705	20.7473	19.6006
19.5947	18.9743	20.0319	19.0404	21.1065	20.1554	18.3246	20.8739	20.9017	19.9517	18.9249	21.1793	18.55	21.0595	21.0025	21.5919	20.436	18.3524	18.1451	19.5192	18.8855	18.7872	17.757	19.8881	20.7073	19.8328	20.3769	22.0743	20.9223	18.8228	19.266	19.2382	18.4455	21.0307	19.3642	19.9946	20.7697	17.8506	20.7852	21.4787	19.6453	19.0039	21.4243	19.678	20.3406	17.8916	20.7621	20.658	21.1196	18.587
21.8832	18.8317	21.8334	20.1288	20.0315	21.1089	20.0027	20.4872	21.6183	20.8297	19.5531	20.0728	22.2316	20.2863	21.8296	18.928	21.6858	19.441	21.6139	21.2014	20.3035	18.4878	18.662	23.1388	20.9207	18.3771	20.6257	20.7071	20.7191	21.0897	20.9058	19.4436	20.0117	20.851	19.4191	20.3881	22.471	17.3633	17.7979	20.069	22.5272	21.6752	20.745	20.4311	19.2709	18.2208	20.3641	21.0215	20.8644	19.1926
26.4469	25.7646	26.4244	25.7984	24.6046	26.1594	27.2238	25.9142	26.0687	27.7657	23.3704	23.1021	20.223	22.9099	24.6199	27.0978	24.333	23.6204	19.988	26.5164	24.3195	26.3801	26.4989	27.4415	20.9703	27.1079	24.0417	24.6967	23.7588	22.7997	27.5312	26.7925	26.8659	25.8161	26.7183	20.9929	26.7712	26.6104	28.048	19.6021	25.9976	26.6413	27.144	26.2242	28.9012	28.0298	28.9085	25.383	22.9566	30.8697
23.1698	19.4199	22.446	20.21	22.8501	20.6117	19.2451	24.3421	21.8814	21.9382	19.5833	20.3394	18.618	23.0876	18.8369	21.9084	22.4339	19.8394	20.0304	18.6113	19.713	22.5611	20.7342	21.6251	22.0074	20.4009	22.2424	22.9937	20.7608	19.2136	18.8106	22.447	23.6772	22.6482	21.5834	18.6972	22.4878	22.7083	23.3391	21.0765	19.7016	23.7527	21.741	23.3647	21.5704	24.0316	19.3413	23.3472	23.1149	25.9728
23.0032	17.505	24.2976	24.9857	22.5254	21.7241	23.1417	24.5904	24.3873	24.7034	23.7947	25.9541	26.6783	24.5174	21.4415	24.0825	21.9417	25.6178	20.1431	22.2659	26.4869	25.3784	24.0058	23.4407	24.8279	23.7976	20.4418	25.6234	24.5584	18.9247	25.8253	24.9766	23.3434	20.8879	25.479	19.1045	24.5182	23.3303	26.2803	24.1102	23.7429	24.7186	25.1145	22.3727	24.0266	22.6753	25.584	20.7723	24.6787	26.2225
21.6149	17.9663	21.107	20.5272	20.1619	18.8994	19.1992	21.1252	21.7935	20.4021	19.3391	20.1423	19.2771	20.4343	21.1198	19.5581	19.4246	18.1272	19.4576	19.6585	18.385	18.5492	17.9374	19.0062	20.5035	19.1743	20.4795	22.0202	21.1647	18.984	20.9915	20.7168	18.3676	21.2452	19.9508	18.8034	20.3026	17.3789	21.0949	20.8301	18.8273	19.0768	21.1509	19.1542	19.8148	18.7519	19.9524	20.1316	20.2083	19.4879
21.5824	17.6253	21.8968	18.8153	20.6293	20.6847	18.2113	21.3588	21.3833	21.7455	20.2195	20.1827	19.3088	23.4295	20.0468	18.3547	20.8792	20.6026	18.9765	20.4903	20.0674	22.4539	22.8692	20.3378	21.1919	19.2437	22.6921	22.7561	21.1841	19.5583	20.8146	21.9997	19.3895	21.2624	20.7769	18.8652	21.0733	19.8818	24.4442	23.4459	21.346	24.7158	21.3488	20.334	20.6107	21.6542	20.2504	26.1314	24.9413	23.8561
26.8823	26.5232	26.8117	25.6683	20.5514	25.2056	27.4922	23.5523	27.3345	27.2624	20.7798	23.6626	26.8153	20.9645	25.9833	27.8124	26.5069	25.2777	25.9098	25.2996	27.2284	26.9975	27.9469	26.3278	21.9927	26.9306	25.1938	27.7159	25.0172	25.9661	26.9495	27.2913	28.6096	21.1234	26.6338	25.3321	26.767	27.6754	29.3982	22.3589	26.9787	26.9725	27.1726	26.091	29.0872	29.8617	30.9578	23.2541	25.7992	30.333
25.2051	19.456	26.1805	25.234	23.0483	23.6261	26.9526	24.7219	24.9885	25.5051	24.6673	24.3471	23.6057	23.791	22.9778	26.2916	25.0676	24.5457	23.4198	24.873	20.6216	23.8579	26.4773	23.9272	25.3899	24.1552	26.3725	26.6644	21.5492	22.7549	24.7346	24.0008	27.2341	24.3547	24.8391	23.4939	24.5275	25.9983	28.7941	23.9644	25.5841	28.0599	27.5395	25.2215	26.7716	28.5717	27.9178	25.96	26.7506	28.6137
27.1783	24.5579	26.4193	27.3645	23.7102	25.3582	26.0469	25.9071	27.4267	27.5785	26.6672	26.1692	27.8673	25.9842	24.9013	27.3361	24.3832	27.8546	26.1833	25.4527	27.2116	26.6354	27.7372	26.5677	24.4445	26.8116	23.6737	28.3589	27.4973	26.6334	27.4847	27.3463	26.9077	23.7192	27.7428	25.3136	28.0324	26.7961	29.2256	26.1485	26.8854	27.8492	27.4303	27.1534	27.982	27.9363	27.1371	26.0311	26.894	29.6489
23.7368	18.3732	25.4345	24.6125	20.2551	24.7287	24.3418	20.3552	24.886	24.6502	24.1102	20.5933	25.2752	23.0431	23.7165	23.6647	24.6535	24.2847	24.5822	23.5963	26.0896	23.2014	23.3079	25.3925	23.585	25.2316	20.8452	24.4591	21.3319	23.8214	24.4219	23.1878	25.0808	21.6242	23.7724	24.6047	24.7595	24.1833	24.5643	19.903	24.8957	23.9807	20.8944	24.4379	24.5652	21.9537	20.6161	22.0949	23.8009	18.8099
19.1313	18.4058	25.3004	25.3388	20.8725	23.4725	22.4336	23.0655	21.292	19.2953	18.9703	20.441	25.986	20.54	23.9681	23.133	25.2926	24.745	25.4705	23.8698	26.4214	24.0414	19.133	23.6774	23.5699	23.7948	20.8628	19.8636	21.0271	26.3993	23.3508	20.1796	21.7852	23.6348	19.9764	23.6636	22.3793	23.6048	24.1005	19.7485	25.6498	23.6789	21.5756	25.3839	20.0801	19.3913	19.536	20.5144	20.6003	19.8502
19.2077	20.949	29.2364	27.9489	21.0985	26.4784	25.2762	21.2907	24.3239	23.3517	19.6652	20.9901	28.1654	24.4166	28.3637	23.0938	27.2166	26.5373	29.8278	23.3594	28.1665	25.0821	19.5706	27.2011	26.2898	27.6123	20.7206	28.3377	21.5931	23.082	28.0619	19.5904	27.4381	20.9137	19.7697	22.9535	26.0956	26.8922	26.3563	20.1046	26.6931	26.3925	29.1446	22.6219	23.8607	18.953	19.239	22.0526	20.7914	18.7799
18.8368	18.1423	18.5331	21.7458	20.1274	17.9751	21.7305	20.597	18.6844	23.9984	18.4026	20.2111	19.0526	22.0897	20.4903	18.4492	18.9364	18.5397	22.4035	22.7649	17.7756	22.0824	17.6901	21.9624	23.6594	23.2437	21.2332	21.3382	20.79	19.586	18.8962	20.5626	19.7232	22.5387	20.5149	19.4638	23.3843	24.2595	18.7562	22.0965	23.6589	21.9827	21.5916	23.3626	19.4712	17.8261	20.0049	24.0476	20.3526	18.4856
18.8486	19.0924	20.7103	19.2277	20.3613	18.0672	18.4651	21.0827	19.1167	22.1418	19.0261	20.6444	19.9764	21.2404	18.3457	17.9903	19.0169	21.2833	20.6462	21.3192	17.8761	18.8635	18.1431	18.4399	20.3611	21.1081	20.506	23.0847	21.2368	19.3627	18.4807	20.9186	18.5115	21.3089	22.6921	19.4926	21.0364	20.3181	18.9763	20.2831	20.2491	18.8632	21.9898	18.9415	22.149	21.9145	19.5966	20.7011	21.0259	22.8428
26.5875	26.2912	26.2252	26.0871	22.0235	25.57	26.1628	22.7364	26.9699	25.1676	26.7257	23.7153	26.3623	23.2459	26.2635	26.2842	25.7495	25.6798	25.4534	26.1529	27.2297	25.8945	26.9858	27.5619	22.9487	26.7115	20.9105	23.5805	23.193	23.9613	23.2384	25.9681	26.0642	24.1943	27.2535	27.3103	25.8234	28.3049	26.2187	23.6491	22.7916	25.1672	26.1981	23.0016	26.8044	26.2557	24.8031	23.8084	22.4232	25.4193
23.0085	17.7443	19.3428	18.9228	20.1884	17.6203	19.7792	20.4183	23.4471	18.7612	19.1658	22.6982	18.6656	21.4968	18.437	18.0049	18.6262	18.2347	18.3109	20.0418	17.3882	19.1444	22.3808	22.7999	20.622	22.1702	20.1754	24.9175	20.425	20.1677	18.494	19.3892	17.9268	20.5907	19.4576	19.2599	21.3554	21.5896	23.7323	20.571	19.9013	21.2298	23.5647	19.4319	21.6883	24.0406	20.8175	24.2249	23.315	23.6067
19.0452	19.8609	18.4334	18.9854	20.2239	22.1835	23.0388	20.4549	22.2324	18.8492	21.8639	19.857	19.3948	20.3951	17.9937	21.1235	18.6386	20.9037	19.4092	18.3947	21.254	20.7582	21.2259	22.0906	20.4292	18.2704	23.1161	24.1731	23.9129	19.0255	18.7141	22.7869	21.4026	22.4377	21.87	20.0989	20.1432	20.6181	23.2993	23.2158	18.593	22.5204	20.8743	19.6777	20.4055	23.4825	24.5889	21.9557	20.3332	24.0935
23.9012	24.3677	18.6567	19.5914	20.5677	17.6345	17.8692	20.8102	25.9033	18.4216	23.0938	20.2459	23.1203	20.6605	23.0005	18.2481	18.8457	22.9516	21.643	22.6242	25.2915	19.173	24.4376	25.081	20.4687	24.8477	20.5384	19.8737	20.8259	24.1111	19.5032	19.7576	22.4266	20.9454	20.0457	18.9085	20.4352	23.233	26.6821	20.9177	18.375	19.2122	20.6771	24.8622	19.4443	26.239	23.4115	20.2726	20.1427	25.0612
20.5475	18.4942	21.3595	19.6206	20.5842	17.8713	20.1946	20.8273	21.2842	20.8896	20.8865	20.3329	20.8515	20.4643	18.0078	22.4705	23.1493	20.8711	19.8113	21.7244	17.4038	18.9416	22.296	19.3566	20.852	22.5561	20.6197	23.7389	20.9157	19.6609	18.8715	19.4853	18.0232	21.0248	21.6107	22.4201	20.2193	17.6371	19.8283	20.6801	18.8775	19.346	21.1858	20.0743	22.4715	21.57	20.4311	20.9301	22.0995	20.9029
19.7497	17.1315	19.9873	19.385	20.4506	21.0723	18.533	20.6892	19.8686	18.4353	22.4397	20.1358	18.0699	20.5046	19.1625	19.1197	21.5968	21.4757	21.187	18.7915	20.2087	20.6587	22.7004	20.7639	20.8705	18.5094	20.4357	23.8855	20.7124	21.5244	21.008	19.5412	17.5551	20.845	18.977	19.5707	20.2636	18.5626	22.3674	22.6262	21.8847	24.6751	22.1281	22.8042	19.9555	18.0947	19.0231	20.2536	22.9373	22.7223
19.1857	21.834	24.3639	25.2123	20.9324	24.3367	25.4562	21.1871	21.1486	24.4244	25.418	20.6029	18.7242	20.8946	24.8835	26.56	19.5878	24.8006	24.0585	25.4041	25.5633	24.7464	25.5315	25.7601	22.4161	19.7465	20.8718	20.0432	22.3132	25.4006	24.0551	23.9092	24.771	26.1975	19.5048	18.3674	22.0044	26.1792	21.6581	20.0691	20.4838	22.7878	22.6425	20.5519	25.7184	25.6973	26.2344	20.0676	20.7347	19.2446
23.8277	23.3049	23.3187	22.246	20.2487	21.8344	23.668	20.4806	25.8297	24.9405	18.8496	23.0441	22.2083	20.9134	23.9999	22.1085	23.2605	18.2973	21.959	18.4982	24.1956	21.2205	24.364	24.1305	20.7215	24.1035	20.8432	23.0359	24.7949	25.2015	25.5363	23.6089	23.3133	21.2711	22.9262	23.5833	23.2277	24.2764	26.6085	24.1295	22.6773	20.4182	24.4091	19.8361	23.942	25.9712	23.5748	20.5473	22.8149	24.9877
20.1163	23.2448	21.2343	20.2344	20.6291	18.7201	17.9315	20.8736	23.7919	19.1257	19.5987	20.5723	18.8707	20.7617	18.2427	18.4219	20.8545	18.9035	18.0837	18.5584	21.193	19.7758	20.8033	20.954	21.2587	20.5774	20.5582	20.6504	21.194	23.7063	20.811	20.0826	17.57	21.2432	19.623	18.9616	20.6928	17.8216	18.8714	22.9949	22.0647	21.4195	20.9146	20.2245	19.1799	18.4994	19.2328	20.2916	20.6339	18.84
20.457	17.8045	20.4309	24.0277	19.938	23.368	25.5203	20.1595	21.1218	18.6618	19.5497	20.267	18.539	25.5292	22.6128	22.6248	18.9937	21.3578	20.7936	22.5798	23.6649	18.5922	19.3047	25.7822	20.4964	23.1704	20.6748	20.1643	21.1625	18.5064	22.9265	22.695	21.3008	20.9648	19.3554	22.479	20.7134	19.0442	25.1316	20.4341	19.1294	18.4113	21.7254	23.1984	23.9691	25.3584	24.5259	21.0562	20.3721	23.3826
23.2687	22.8154	21.8251	23.6079	20.2793	18.0406	22.1658	20.5122	23.32	25.5133	19.0601	20.3919	22.4375	21.3084	24.1425	21.4564	21.3658	22.0163	18.4999	22.051	22.847	19.2506	22.3311	23.3851	20.9204	24.2581	21.5324	25.6128	20.8477	19.0766	22.7008	21.2506	21.3004	22.7502	19.9894	21.6636	20.5466	22.5017	24.548	23.8297	19.5357	22.1498	20.5337	24.3175	24.7675	24.243	24.6802	23.8673	24.3172	24.0752
21.3243	17.9552	19.8126	19.0292	20.3557	20.707	21.6096	20.5912	22.0386	21.7566	19.2604	21.3106	19.325	20.5328	19.0846	19.5733	19.974	18.9326	18.1923	19.1415	20.727	21.7297	21.6648	22.9	20.15	19.1695	20.1465	23.7852	20.9765	23.3736	19.9138	20.1086	17.818	21.0787	19.9479	19.0947	23.2883	19.4917	20.853	20.6121	20.025	18.4871	20.673	22.5885	19.8616	24.4509	25.2723	22.7703	22.3919	20.0498
19.6272	20.2738	18.7164	22.2594	20.1827	23.0867	23.516	20.4124	22.6117	23.1497	21.7258	22.3727	19.2736	20.9642	22.6302	19.8517	20.3329	20.423	18.2554	21.4913	22.6904	18.0542	20.9657	23.8821	20.5305	21.7961	20.7028	24.9999	21.9236	19.2042	21.3143	21.7216	18.7071	21.9166	22.6266	23.0585	21.1481	17.5687	23.1277	20.2035	19.6896	21.9925	24.1495	22.9183	21.8015	23.1417	24.9222	19.9324	21.1552	23.089
24.1942	17.614	22.8703	24.6069	20.5927	23.2221	18.0307	22.929	21.9175	22.8565	20.7335	19.8259	18.7598	20.1802	25.1102	23.8418	18.7908	22.356	21.6694	22.4462	24.9935	18.6451	17.8083	24.6721	20.6157	25.0082	20.5502	20.9665	23.6092	20.5373	24.1704	22.4616	21.0563	20.5624	19.5335	22.6426	20.2947	23.3624	25.6127	20.8305	21.5397	23.6728	21.1072	24.7198	19.4982	26.2037	24.6525	20.0637	20.0042	18.2717
18.9931	20.0666	22.4142	20.7574	20.5658	19.1618	21.8813	22.514	22.1485	22.569	24.332	20.422	22.0653	20.5674	18.4106	22.4045	21.4878	18.697	18.8669	22.0832	22.3154	23.0416	22.095	18.327	20.4228	22.6381	21.0972	22.2339	23.5111	18.9152	19.8427	19.7848	17.9953	21.106	22.6659	23.5914	23.4866	20.2714	19.1063	22.6199	18.8274	21.8602	22.202	19.383	22.9092	23.2416	22.3494	20.4732	22.5359	22.1582
22.3099	20.4922	22.4203	23.7013	20.2979	22.8319	21.8225	20.836	22.166	21.5395	23.1329	20.2584	22.3649	20.6541	19.5227	19.9948	19.1623	23.6534	23.512	23.1101	22.9293	18.7774	22.6782	19.434	20.8799	21.2507	21.9611	21.2601	23.7618	19.6001	20.2954	22.4768	19.6474	20.9569	24.8327	24.5714	20.7694	18.032	22.2873	20.1854	19.3425	19.768	21.1946	19.8858	24.2713	22.9078	21.1104	20.5557	20.1387	23.9105
19.3458	18.4225	23.801	24.5246	20.4075	19.5723	23.0645	20.8083	23.0727	23.8516	24.9394	20.8444	18.97	20.4578	23.471	23.6488	18.8877	24.4984	24.5428	24.5795	24.0289	22.9383	23.2651	22.9237	20.8499	22.4625	21.5582	19.9983	20.9941	19.5552	21.8066	19.8982	22.1414	21.4914	24.7963	25.9962	22.5664	21.3592	20.3226	20.008	21.8628	19.8239	20.8935	20.131	20.5848	24.6229	19.8866	20.2717	20.558	24.7035
22.7272	23.8926	22.5375	21.2214	21.2137	20.8008	22.1463	20.5314	18.3758	21.7707	21.0105	21.3382	20.5158	20.9229	22.6013	22.9303	22.1952	22.2874	18.8964	19.1695	23.1392	19.9036	22.0654	22.9119	20.5512	22.4347	20.8502	22.1783	21.7988	23.0349	20.1476	23.3945	22.4117	21.9418	22.0896	21.5568	25.0329	23.5701	22.6853	23.1466	19.5938	23.3132	21.1765	22.4476	24.2654	23.7732	25.6044	20.5385	20.6425	23.7361
19.0851	18.3695	18.1873	22.9683	19.9108	21.0956	17.5493	20.6447	21.5146	22.2857	21.8443	20.5798	22.1567	20.8925	19.9298	21.5335	18.9441	20.0594	18.6586	21.2559	22.2201	19.9357	17.877	18.5798	20.6734	18.5732	20.8155	20.3023	21.9195	19.1076	18.6558	20.657	19.1698	23.4276	22.5209	18.7934	20.9819	17.6895	19.1691	20.4655	19.017	20.0682	20.5851	19.5681	22.2531	21.7013	20.0183	19.9808	20.3517	18.4795
20.3224	17.8412	21.8196	19.6996	20.4338	17.8086	17.5646	21.4778	22.7964	22.4132	18.3528	20.5427	21.1918	20.5885	22.6365	21.7885	22.3309	19.5466	20.2265	20.1393	22.1321	18.4779	21.4978	21.1483	22.4094	18.007	21.2881	21.2255	22.2086	19.2907	19.0508	19.5803	19.5135	21.25	23.4554	21.2909	23.3134	21.2768	21.8552	20.2216	19.9019	22.4971	20.9454	20.4318	23.8386	22.4496	19.5649	20.3206	20.625	22.9292
27.686	26.0475	29.152	29.3855	23.0129	29.4176	29.6745	27.1817	29.0903	28.9707	29.0072	27.0958	30.6075	28.7112	29.4893	28.8643	28.7682	30.1564	29.7382	28.7828	30.62	28.6211	28.9462	30.8463	25.0508	30.5488	22.7733	26.1308	25.5606	28.3495	29.3732	28.0363	28.3177	25.6871	29.1227	29.2265	25.3703	29.2655	29.9667	26.1262	28.2122	26.754	27.132	29.3157	29.1379	29.4505	25.1104	25.8497	27.1397	28.6553
26.4176	26.7328	26.2617	25.6872	21.5778	24.1373	24.8227	20.1313	23.3613	23.3486	25.5407	22.4371	26.5146	23.0471	25.2316	25.9609	24.2253	22.6	25.6153	24.823	24.6235	23.0176	26.5132	24.0324	21.5723	26.2836	22.4521	24.0138	24.8121	23.3105	22.8101	26.1128	23.6286	22.7823	26.1127	25.6403	24.0287	26.7287	24.5111	22.2162	23.5656	24.4612	23.8899	22.548	27.0551	25.9624	28.4899	22.5886	23.5253	25.0957
27.6939	28.9346	30.3763	29.6002	23.7541	28.4701	28.8286	25.6523	27.6291	28.5752	30.4169	25.795	29.2434	26.043	29.1282	29.8286	28.536	28.9835	29.4392	28.5443	29.4224	30.7701	30.843	28.1088	25.4549	29.65	23.919	27.145	24.7443	28.0498	27.2663	29.05	27.103	25.9854	27.4708	29.1094	27.8564	29.6805	29.3486	26.0742	29.4322	27.7587	29.4783	27.2037	28.3006	31.0852	33.4214	25.9637	26.1582	28.845
25.3018	23.6622	26.2338	24.5482	20.2903	25.1801	25.5491	22.8267	24.4424	25.7805	26.2643	23.4321	25.0911	20.7129	24.8765	24.4163	25.5232	25.6078	25.0545	25.4035	24.1457	24.916	26.8147	24.1458	23.7456	25.3523	22.3981	24.8168	25.3805	22.2718	23.7535	25.999	25.2232	24.1794	26.0175	26.0091	24.6899	27.1717	25.7275	22.5889	25.6137	25.3926	21.2302	24.7948	26.893	25.8094	29.6953	24.0483	25.4188	26.1674
25.5913	28.5461	28.1865	26.9859	20.8046	27.592	27.815	24.1507	25.5179	25.2718	29.0999	23.351	26.295	22.966	28.0076	28.3437	27.4342	28.501	26.6887	27.5884	28.3744	27.6267	27.3466	26.8365	20.1196	27.8115	24.0233	24.815	20.393	26.0288	24.8781	25.5546	27.4168	24.9735	25.2197	28.653	24.6908	28.1297	28.0149	22.5316	24.4599	26.6808	25.9799	25.4693	25.0787	30.4247	30.5509	21.7482	23.7397	26.8183
22.5696	18.0573	23.4997	22.4102	21.238	18.2335	17.8197	23.4986	21.9666	21.916	23.3606	21.0489	18.0176	21.866	21.8731	18.1837	23.3269	18.3411	21.3048	21.6739	17.6623	19.8553	23.7482	20.2835	20.7028	21.9754	21.0463	23.036	21.0074	22.533	18.7588	23.9389	20.9181	21.2162	22.4966	19.5073	19.9067	17.7598	21.6298	24.1194	18.9915	24.7893	21.4761	22.0228	22.1246	18.8277	19.9909	20.5892	22.7511	23.956
27.4084	25.9393	27.0631	26.6784	25.8749	27.1203	26.7907	20.8067	27.9737	26.7075	27.0986	27.6794	27.0179	24.0966	27.3929	27.2666	28.181	27.5248	26.8531	26.0907	27.6768	25.7058	29.0687	26.772	25.5442	26.99	21.8331	28.5215	24.0141	27.8884	28.6273	28.2106	27.0881	25.7546	27.6362	27.0309	26.884	28.1457	28.5956	26.6658	25.637	28.7631	27.4545	28.6634	27.96	30.6625	28.467	28.1142	27.4788	30.0652
27.5818	29.6481	29.6455	30.5298	27.4887	28.5166	31.0939	25.8393	28.7136	29.8642	30.8438	27.7913	28.7144	26.6316	30.6367	30.6709	28.3052	28.8058	30.1445	30.512	30.7425	30.2514	30.4615	32.0465	27.7712	31.2647	25.1221	25.2143	25.491	28.0119	28.4991	30.4312	29.968	27.2506	28.7688	29.8378	26.2866	31.5259	29.3367	25.2371	27.6846	27.9322	24.0385	27.4078	29.0476	31.9522	31.4219	25.1685	26.904	29.0548
20.1666	20.3233	24.5967	26.4467	20.5724	24.6566	26.8078	21.826	21.8943	25.5892	27.0211	21.8508	26.4264	21.6275	26.3647	25.6579	26.3743	25.4843	25.0763	26.8221	26.2467	23.6705	25.7651	27.2874	23.2528	26.883	21.0696	21.9196	24.4519	26.5822	25.4541	23.6787	24.6579	21.6779	27.4437	26.0438	22.9499	27.7581	25.3738	20.624	18.7412	24.3283	21.4812	27.6412	22.2076	24.8627	24.9423	20.8212	20.0538	24.8249
21.7918	19.6471	23.4308	20.8907	24.3211	17.9194	18.7341	21.3086	23.7974	22.2107	23.7209	23.3043	22.5871	23.042	22.3081	21.0874	19.6957	22.1616	21.4392	19.7683	20.8407	23.991	21.8859	19.8886	20.5428	21.7273	21.3529	23.26	20.8388	20.6376	18.8187	20.1792	19.5997	21.4417	21.3952	19.4606	23.3146	21.151	21.9914	19.519	20.3648	24.0688	20.7677	23.1963	18.9878	18.074	23.1029	20.826	23.5714	20.9464
19.1386	17.0778	18.2745	18.4814	20.5398	22.556	18.0021	20.6719	24.0903	19.4739	19.3085	20.7899	19.0205	20.1493	18.1805	22.1908	19.49	23.786	22.7905	18.9428	18.5888	19.1876	18.5427	18.6474	21.1162	18.1004	20.4428	20.0776	21.443	18.4609	19.3992	19.0909	22.8388	22.2105	19.7031	18.994	20.3328	18.4406	18.6124	20.9509	19.3868	18.9546	20.3001	19.5432	19.1744	19.2305	19.1005	20.1531	20.4018	19.1273
20.74	18.1093	21.2687	19.0831	23.8257	18.9396	22.6046	20.5236	19.4964	21.6882	19.0463	21.7696	18.7453	23.2287	24.3161	18.62	21.8681	19.0117	23.8174	23.3956	22.5994	19.1412	18.5747	23.3082	21.5993	20.8686	21.0488	20.1237	21.9521	19.3347	19.4271	19.6284	21.8359	24.1546	20.9499	19.1849	21.2559	18.4733	23.0217	19.879	22.8664	23.1523	21.7092	19.2989	19.7563	18.0406	19.643	19.712	20.6768	19.2578
19.6568	17.8263	25.4241	25.3999	22.5836	23.3607	19.21	23.4382	21.4403	18.8238	19.986	24.5238	23.6213	20.7427	19.3996	18.2975	19.5163	23.8153	22.8511	19.7601	20.5235	18.6773	18.3159	22.6984	20.8573	23.3302	21.2843	22.535	21.1702	23.1636	21.7868	19.7488	19.7423	21.7412	22.1832	21.2575	25.2354	23.3315	22.0842	21.7222	22.832	21.7226	26.9778	22.8595	19.8734	17.7134	20.0718	21.041	20.9144	18.8085
24.4011	18.8404	24.0729	22.6699	20.984	23.414	23.4567	21.0551	22.7805	24.1945	23.8018	21.6328	19.7314	20.5799	23.2897	18.3637	23.562	23.3954	22.8342	24.233	21.6042	24.1316	21.531	22.8949	24.531	20.0334	21.0724	25.0902	21.1319	19.095	23.8392	22.1866	25.8443	20.852	24.7307	22.879	22.2142	24.7559	25.4229	24.0689	19.0427	22.9913	25.7823	24.4494	24.2522	18.5572	24.4954	20.2927	23.6505	27.3162
23.9651	19.6949	23.5598	24.2829	20.7568	23.2113	19.6522	21.5029	22.9992	25.5528	21.4266	21.1183	20.5622	21.1634	22.4601	21.7875	23.1118	22.7239	22.4158	24.655	17.847	24.2688	21.2258	21.6311	20.8209	22.6602	21.579	24.2343	21.6538	19.9542	23.5289	24.6801	23.282	22.5678	24.2498	22.3615	23.5574	23.6997	25.1163	20.6093	22.8865	23.7993	23.4876	21.8556	25.9195	24.2531	21.2637	20.1847	24.3686	27.7136
23.7865	18.3825	24.7148	24.0182	22.8457	21.7702	22.1744	24.2518	22.0129	24.0655	20.7777	23.8898	19.2861	22.1265	18.6019	20.2162	21.2538	20.561	19.5158	22.1788	18.9357	22.8465	22.5959	18.0484	21.3162	20.3329	24.4131	25.3725	21.3868	20.6781	20.3985	19.4763	25.3787	21.4441	24.5008	21.1246	23.864	24.0337	26.6987	24.3922	23.2435	25.1386	24.7668	22.7881	25.5752	25.392	23.9784	20.5147	21.1586	28.1042
19.6818	18.3182	17.851	19.2178	21.4965	17.9839	17.7522	20.8151	19.2046	19.8965	19.5616	20.1434	19.2237	21.655	18.2904	19.0048	19.304	17.7932	18.2996	18.6005	19.071	18.8671	19.249	18.1471	23.5964	17.6471	20.5136	20.5704	22.2557	19.5662	19.2014	20.1219	17.7523	21.4672	18.9349	20.5887	20.4282	18.2087	18.7042	20.0043	20.0718	20.3683	20.9158	19.929	19.4699	19.6686	22.7743	20.7757	23.9505	19.2307
19.4803	19.1942	17.8645	18.9128	21.045	18.6082	18.2099	20.7814	19.3949	20.2892	19.5021	20.7926	20.0754	20.8999	18.3544	19.0357	20.0692	18.395	18.9761	19.2456	19.519	20.2628	17.9251	17.6676	21.0628	17.6616	20.1547	20.5919	21.7254	19.5118	20.0149	20.0797	18.1974	21.9621	19.7438	18.32	20.2122	19.1628	18.2586	20.3948	18.5592	20.0225	22.5057	19.5931	19.8491	21.9751	20.4422	20.7151	20.9193	22.8154
20.2066	18.746	18.0889	19.6355	20.1894	18.6383	17.8715	21.2405	20.1318	18.6018	20.3138	24.01	19.6396	22.5158	18.9736	21.7716	18.9835	21.8745	17.7468	22.4421	22.5933	18.0071	18.6615	17.6829	21.8875	17.9018	22.8739	23.3556	20.7203	20.2539	18.8607	19.6577	19.8636	20.9212	19.5218	19.2307	20.724	17.809	23.2558	23.9151	18.736	20.5633	25.1379	20.5975	19.0566	18.1074	23.7502	24.6431	24.2101	23.0302
19.1761	20.2046	19.9739	19.5882	21.3161	18.3955	17.8432	21.0056	19.3042	19.0084	19.8985	20.8179	21.0579	20.863	19.0034	18.7864	19.5874	18.5297	18.3539	18.0735	17.5938	18.9127	17.3234	17.937	21.3842	18.7626	24.2795	23.1115	21.3895	19.8742	19.5028	19.8303	17.8684	20.5704	20.3172	18.9808	23.4009	21.0201	22.4077	20.4735	19.2871	22.1016	22.7681	19.1212	19.5395	23.8283	23.8533	23.1378	22.3273	20.8408
19.7493	19.3144	21.6807	19.1158	20.7591	19.2706	20.4563	21.77	19.5074	20.8458	21.2501	21.3605	20.0899	21.8859	18.7627	19.685	18.4901	20.4905	18.4899	20.5159	18.894	18.6642	17.9842	18.8477	20.4302	21.1496	24.1481	23.275	21.4156	21.11	19.9693	21.1	20.2657	20.8021	20.9874	19.8764	23.1304	18.5621	22.1288	20.2026	19.398	22.0512	21.1512	19.2937	20.5586	21.682	24.4508	19.5534	22.9494	24.9681
23.1936	17.6272	23.4743	20.6667	23.5293	22.2701	19.8314	23.1297	23.5819	22.096	20.4251	22.591	22.3667	23.8221	21.6185	23.1629	23.1449	22.7577	21.9982	21.3288	21.5973	23.8776	23.2486	22.1763	21.0654	22.6339	20.9086	24.5984	21.975	22.303	22.2549	23.818	22.0202	20.5786	23.8398	21.9334	23.2485	22.7602	23.3137	23.5427	19.0159	23.8662	23.383	23.3419	19.9211	21.8551	21.0873	24.9203	20.2302	24.7822
18.7076	19.9008	18.8933	19.3091	23.7776	18.029	17.941	21.3035	21.6081	22.3502	18.8618	20.2193	23.203	23.0158	19.6306	18.41	19.032	18.2247	18.1821	18.6523	20.4799	19.5546	18.1322	18.1186	21.0902	18.0734	22.8606	21.9808	20.7985	20.3557	18.3361	19.0481	20.8382	20.6019	19.9581	20.6309	20.6905	19.811	23.3338	20.4571	20.0294	20.1058	21.4279	19.8316	20.2507	21.9949	24.3647	24.4606	19.7785	21.5464
23.0145	20.6904	23.089	21.8363	20.7813	20.7913	22.8685	24.4571	24.7582	18.7079	19.9028	23.8564	20.1922	21.3669	18.3991	19.1193	19.1534	18.9475	18.9114	18.7819	20.5127	20.3048	22.8371	19.3217	21.6211	22.7438	23.1777	24.7325	20.402	18.9263	18.9123	22.0892	21.4074	21.5358	22.2397	19.472	23.9081	21.7871	25.5121	23.0073	20.4758	24.6584	23.8213	21.7172	19.9132	24.657	24.3968	22.2587	25.0064	26.4424
21.1455	18.7506	23.3976	24.3675	21.2575	21.044	21.2902	25.2347	21.8395	24.3637	23.0064	24.5522	23.3727	21.1091	19.0842	23.8355	18.8786	21.8341	21.6465	23.6521	23.5546	24.0547	21.4261	22.6343	20.5045	22.6146	20.3918	24.0077	22.4605	19.8781	23.6102	23.6389	22.2917	20.9909	22.4556	22.1318	23.9621	22.0218	23.592	23.7244	23.0953	23.0851	21.3636	19.94	26.5704	26.7603	25.9618	27.3608	21.1395	27.6493
22.9311	18.7944	22.8284	23.9833	24.2952	22.1841	21.7357	20.4193	21.964	22.5463	19.9433	22.7271	23.3415	21.9483	17.8393	22.2212	19.5296	23.7757	18.8636	23.4303	22.6786	23.1907	20.1988	19.762	20.1282	22.2597	20.163	24.9814	20.6639	21.6927	21.3133	19.8718	22.2989	20.6248	25.3348	19.4153	20.5019	22.6443	24.3271	24.4365	21.124	23.0345	22.1475	22.0722	20.2576	21.8899	20.4499	19.9341	23.0578	18.3484
21.5536	19.7334	21.8777	21.4931	22.5764	21.0406	18.6136	20.2594	21.4167	21.5019	20.8134	19.8347	22.8896	21.4361	18.4541	21.3303	22.4819	22.698	21.2726	21.7603	20.005	20.7195	21.5529	20.8621	20.3768	21.7462	20.1869	23.4998	22.7552	19.9152	20.3034	24.698	20.7347	22.2998	23.459	20.1888	23.3229	20.9428	22.612	20.6608	22.8009	21.7239	20.1319	21.9848	21.7239	19.7538	19.3754	22.5066	20.3732	22.1158
23.026	20.5261	22.6901	23.7834	20.2559	21.0588	22.8652	25.3164	24.6147	21.715	18.9835	24.1349	18.5518	25.9231	18.5918	19.5241	19.487	20.9858	20.9851	20.9705	22.7874	21.47	19.0445	22.8878	20.137	22.289	25.0143	26.2602	20.4113	21.0764	22.7479	23.8796	24.648	20.91	23.4198	23.2073	25.7265	24.1441	24.9059	24.9555	22.7938	24.0071	26.2156	19.5669	23.8115	23.3926	26.2616	25.1189	25.895	23.5362
27.3807	22.3898	27.8988	28.1034	25.3506	27.0887	26.8396	24.7303	27.1231	27.8134	27.8096	26.4429	27.7615	25.3355	25.9183	28.0884	27.3725	28.1351	26.6154	27.0498	27.9673	28.0375	28.0265	27.837	24.5177	27.5332	23.74	27.0762	27.7124	26.5956	27.8358	27.6709	28.2269	26.0053	28.8164	27.9605	27.2663	28.5919	28.616	25.4773	25.5578	27.5192	25.2653	27.3507	27.7806	28.8958	27.0465	26.2973	26.7604	30.3588
29.6223	28.8426	30.3092	30.7172	26.0013	29.9273	30.469	26.1122	30.1435	30.7139	30.5395	26.2774	31.9157	26.6606	29.9995	30.2623	29.4533	30.8087	30.0022	29.6604	31.6297	30.5081	30.831	32.2168	25.8896	31.1498	23.6747	28.8647	27.6362	28.307	30.18	30.1086	30.1321	27.5603	30.1422	30.2745	28.3504	30.5306	30.2003	27.1261	28.6999	28.9412	28.017	28.4834	29.5654	31.6206	29.0011	26.5006	27.2021	29.9788
23.2047	21.1467	22.7707	22.1174	19.9185	21.5208	22.4566	22.2782	21.2999	22.0337	18.3669	20.0888	22.35	20.4654	21.1836	23.9034	21.2241	22.3865	20.1967	18.4885	22.4706	23.1758	23.7759	22.5239	20.162	23.4458	23.3469	21.7821	23.1434	22.5265	22.5557	24.2745	22.6251	20.7794	23.1452	19.793	21.8695	22.9421	25.4121	23.7626	22.8074	23.3965	25.8785	23.7438	23.7938	24.2846	24.6603	22.8149	23.7531	25.9191
19.2221	17.7585	19.0781	20.7303	21.3513	18.7197	18.646	21.9557	21.6982	21.368	18.7742	20.268	19.6441	21.1118	18.2801	21.0511	19.0616	21.8273	21.7766	19.1838	19.963	21.9713	21.9221	17.8697	21.9415	19.2106	21.1427	20.4182	20.4376	20.7107	21.5248	19.6458	17.9359	21.3438	19.9077	21.081	20.356	17.1936	18.2727	20.7703	19.375	21.572	20.5356	21.6647	20.3468	19.4525	18.6713	21.342	20.6005	22.3005
19.3373	17.0931	18.2493	18.4334	20.1414	17.4647	18.3845	21.008	20.5594	18.7695	18.3813	19.8437	19.6867	22.9314	19.0186	21.4022	19.2356	18.9002	18.387	19.1383	21.9299	19.1525	17.7972	18.3256	21.1638	19.6269	20.585	21.0443	21.4932	19.0376	19.0413	20.4557	18.5899	21.2391	20.5947	20.2949	20.4928	17.8695	22.1254	19.9253	18.6244	20.612	21.0493	19.9175	22.188	23.4662	20.7931	20.4186	23.9925	24.3529
19.0765	17.5327	22.8283	21.771	19.9263	18.0845	19.0973	23.85	20.3358	19.3669	18.4223	19.8693	27.6317	21.1369	19.0193	17.8305	24.1918	20.4679	25.1148	18.6839	25.1434	19.0961	18.591	22.9437	20.5793	20.0573	20.2103	20.156	20.8773	18.4738	18.7492	21.1382	24.7935	21.3272	20.2432	18.8051	21.4993	22.272	18.8951	20.2493	23.0004	25.0377	25.3505	23.8174	19.3014	17.4756	19.5984	20.3753	20.8678	18.886
24.5413	17.7232	24.7302	25.7278	19.9488	27.2163	27.7288	21.0309	22.575	23.655	23.8408	20.8931	21.3711	21.6772	25.2275	26.4208	23.3866	27.0339	23.6942	25.1151	27.4103	19.8652	19.7905	28.4481	24.9952	27.2677	20.5022	22.257	20.6248	21.1725	21.9902	25.0916	25.1669	22.0824	23.7164	24.9447	19.8727	25.3661	25.2587	20.5054	19.0817	22.7756	21.0034	25.389	24.1104	26.4691	22.96	20.0196	20.8058	23.1336
19.6945	17.1086	19.3119	19.3555	20.8473	18.2233	19.3272	21.5231	19.5617	20.1469	20.064	20.2957	20.5997	23.0118	18.9703	20.8582	20.5158	18.4278	18.582	18.8698	18.0576	19.4717	18.5391	17.9886	20.1866	17.8382	20.3685	20.6501	20.4635	18.8462	19.4413	20.09	20.4061	21.2414	21.3872	19.7971	20.5257	20.3633	21.5459	21.635	19.4432	20.1274	20.6262	19.1849	18.6747	17.7066	20.447	23.6122	19.616	22.889
20.756	17.1528	21.7659	19.1025	22.8761	21.2601	17.9896	22.9257	19.6991	22.0138	20.3787	23.2631	20.9748	22.9497	18.4876	18.467	18.4469	21.1071	19.7254	21.4392	17.7148	20.7523	21.7178	18.0577	20.4925	18.2691	22.0918	22.6003	20.7859	18.4869	21.2327	21.3805	20.3322	22.117	20.689	19.8357	21.3386	18.0208	20.9613	21.4168	22.1491	22.4664	23.7923	19.6312	22.3641	22.1249	19.9528	24.361	25.0439	23.1089
19.654	21.5918	23.1435	20.6731	20.3231	17.909	24.2433	21.451	22.4659	19.3956	24.9371	24.758	18.6794	21.338	19.3495	25.6216	21.4075	21.2664	20.0162	20.2372	20.4819	23.6552	23.9576	22.2051	23.2724	17.91	20.9462	23.6778	24.7439	18.5244	22.4966	23.6897	25.4457	21.2778	19.3657	19.9762	20.3466	23.4201	25.0385	20.7267	19.7554	24.8607	24.1339	23.2841	23.6744	24.7336	21.8554	22.5558	22.8085	22.6794
23.4767	18.9246	24.3454	24.6646	19.9708	23.6723	25.738	24.251	19.0802	23.1677	19.1061	24.0124	18.0324	24.8944	24.2331	23.9482	23.7003	23.9406	23.9115	23.5054	24.0554	21.6814	18.0202	24.7232	23.3847	24.9027	20.839	24.6507	25.4317	23.5524	23.5576	20.0387	18.6214	21.0235	23.743	21.4886	24.2528	23.1438	25.2417	23.7348	24.6704	22.9226	22.9933	24.1991	20.563	18.4269	25.2692	20.67	20.006	19.3109
22.089	17.8909	23.572	20.0091	23.3059	23.6319	18.7337	20.4881	21.1016	24.3151	18.4625	19.8944	18.4599	22.9165	22.9633	18.6095	21.9164	21.7082	23.1021	22.4273	17.9359	22.5716	18.2325	25.2753	20.3524	20.5082	21.7021	19.7522	20.6382	23.7795	20.5543	20.7383	23.2073	23.309	21.5844	20.6649	20.9886	22.5252	20.1206	23.5577	23.8502	24.3354	21.3158	23.2226	19.4998	18.5719	20.3696	24.0016	20.5021	20.7078
28.0578	25.0457	26.6595	26.0607	22.1659	28.2951	29.1104	25.1941	26.6366	28.4177	26.189	22.2143	24.6243	24.8661	28.1456	26.7027	26.3538	26.85	26.4676	28.226	25.7762	26.6811	25.9929	28.812	24.6283	27.199	22.2801	25.6232	26.5252	25.4031	26.733	27.1947	28.0925	25.9486	25.9514	26.1159	24.8933	26.6727	27.5269	24.1731	26.5436	27.9591	22.4851	25.5673	25.7099	26.2328	24.314	24.4874	25.6151	25.8964
20.9115	17.1963	20.4802	20.773	20.2452	18.6536	21.0993	22.6845	19.1596	20.5643	18.9639	20.207	18.0475	22.4399	18.6851	21.6671	21.6733	18.621	17.6983	18.0273	17.7851	19.9707	20.882	18.7277	20.3535	19.2047	23.0723	20.1957	21.2762	20.0255	19.396	20.3803	22.85	21.0485	20.2468	18.921	24.0117	23.4104	24.7296	20.7313	19.3363	24.5173	24.1733	19.984	22.6526	24.2646	23.5809	23.777	25.3501	24.64
22.3735	17.7373	21.5567	21.4459	20.1195	18.6049	17.3816	20.1393	21.6304	19.1634	18.7342	23.6617	18.0905	20.5409	21.7032	24.3867	22.2888	20.0426	21.9997	18.9145	23.193	18.4894	21.8646	20.9128	20.9578	21.2908	20.8414	23.9588	24.0265	19.1497	22.9471	21.5453	23.6278	21.6921	20.2811	18.3334	21.5295	17.6782	24.1033	20.0895	19.7619	18.7216	21.1475	20.2887	24.947	21.6749	20.2728	20.5112	23.4777	24.2375
20.5389	17.4895	20.2051	19.5997	22.4472	18.1182	18.0493	20.6916	20.3412	21.9667	19.7265	21.2437	19.8133	20.1581	20.1374	18.2868	19.2774	17.7452	18.6288	18.671	18.4667	19.4758	21.26	18.7599	20.8455	17.9505	21.4005	21.6748	21.1579	18.5612	18.9436	20.8342	18.3671	21.1461	21.0176	18.7216	20.6987	21.0719	21.2584	22.3812	18.8562	22.8424	22.4667	20.295	20.6419	22.1379	22.2378	21.7554	22.9042	19.9285
21.091	18.5604	19.7009	19.5423	20.6626	18.3173	18.1989	20.3697	21.1245	20.0006	19.5425	20.0638	18.8081	20.411	20.9679	19.0514	19.0496	18.6675	18.3735	19.5433	18.4995	19.5142	21.5781	18.4994	21.7502	18.0159	20.8786	19.4779	22.5127	19.0196	19.1287	19.4868	19.2837	21.3144	19.4687	20.0769	20.658	20.7581	18.5089	22.377	20.8217	20.0813	21.6146	19.4111	19.8152	21.3568	23.6677	20.9517	21.5163	19.6779
24.6105	24.864	22.5101	24.4046	20.5619	22.8471	23.3824	20.1474	23.9891	23.5198	21.025	20.6826	24.3339	20.167	23.9653	24.7179	23.9011	20.7801	22.4831	20.6865	24.448	22.9458	24.7818	22.9897	20.848	24.4692	20.6183	21.5056	22.111	24.2816	23.712	24.5232	22.8965	21.0492	24.3612	23.9224	22.9418	24.4823	24.8492	19.6689	23.4833	22.2028	22.9438	24.607	26.1222	24.3251	26.2261	20.9415	20.4578	24.8553
22.8704	23.1193	21.0244	21.409	21.3733	23.2736	23.3679	20.1706	23.8094	23.7705	21.9207	24.4231	20.8667	24.5644	23.1178	22.3118	21.7389	18.4144	22.5549	20.2783	23.652	20.3386	21.2233	24.4387	20.8871	22.4025	20.6439	26.0395	21.1605	22.1135	22.276	23.3609	22.492	21.6008	18.9468	21.4533	25.73	22.0034	24.6663	22.9311	22.4785	21.916	25.982	24.4824	24.2854	24.5352	24.7795	20.3449	25.9569	23.247
24.6771	21.0896	27.2137	24.1697	24.2571	20.4993	23.4233	24.952	24.9464	23.0218	19.5465	22.0056	22.761	24.5691	23.4194	24.0878	19.8662	20.0548	21.1651	21.4456	22.4944	22.5158	23.0306	21.4792	24.052	23.9705	24.3753	26.0937	21.4707	18.8096	23.7315	25.0626	24.2625	21.5676	23.5662	18.3471	25.0817	26.4522	26.3177	25.2554	19.4143	26.1657	25.2766	24.0432	24.5811	18.0724	26.951	26.352	25.0344	25.5944
24.4739	18.3617	22.7709	22.7967	22.341	23.0895	19.5429	21.0992	23.4483	25.776	22.6063	20.5678	23.9078	24.0257	24.7176	23.3052	24.3976	23.5225	24.3686	24.5437	23.4247	25.0326	23.0597	23.691	26.016	21.7801	21.3026	20.295	23.488	24.2303	22.4056	23.1718	22.4801	22.4639	21.754	22.7716	23.8636	23.2246	22.9808	23.9353	25.0597	23.7471	23.3793	23.9519	20.1861	20.0018	18.4179	20.5829	20.0935	19.6855
19.2501	19.9617	21.5354	20.3254	24.8908	22.4464	23.9601	23.8001	23.9859	21.6993	19.6105	21.4924	21.4815	24.1061	23.514	23.4504	20.5543	21.5557	21.0383	21.33	20.5078	19.1873	19.7937	26.1979	20.6142	22.1375	20.7438	20.0702	21.2016	23.5876	21.511	21.7331	17.9832	20.9736	22.0983	18.3861	22.4167	21.3649	21.4398	20.9363	22.709	20.3983	21.6037	18.8318	20.1	22.7026	22.7572	23.9314	20.7596	18.8795
19.4154	18.3661	18.0295	19.9247	22.8474	19.7815	17.8603	20.5574	20.0044	18.8127	19.1634	21.6614	18.1328	20.1924	17.7903	19.0014	19.4974	19.3212	19.2884	19.1494	18.2345	21.2391	22.0243	18.5003	20.6411	18.6491	23.4005	22.2819	20.9141	19.7169	20.4899	20.384	18.7066	21.3641	19.2916	19.9507	21.2125	18.49	19.582	20.2227	18.2627	18.5048	20.9711	20.5774	18.4492	18.5418	19.0259	20.7815	23.477	23.0038
28.3048	26.9314	28.7596	28.098	26.0947	30.1056	27.4563	25.5521	30.7434	29.5577	24.4822	24.5212	29.5107	26.0609	30.0239	27.6707	29.1362	28.8982	30.091	28.3366	29.1293	26.1823	30.3084	29.8733	27.1641	26.9866	24.4755	26.055	20.9424	28.8571	26.4842	28.6518	32.1323	23.8337	26.2155	27.0512	22.9299	28.7244	29.7601	27.0854	29.3322	28.4125	25.7418	29.2321	27.2946	26.664	23.293	25.3624	22.2781	27.9267
24.5744	18.4352	24.3708	21.2287	20.5641	25.9723	22.7634	21.9585	23.4984	23.5777	19.2074	20.5704	21.5364	21.2119	25.7265	21.303	25.9321	22.9144	25.5626	25.3278	24.0011	22.8608	21.2518	27.1142	23.4484	24.1043	20.9161	20.9538	21.6699	25.5758	22.325	22.5218	22.7877	21.3115	22.6728	23.0854	24.2921	22.616	20.7525	20.4344	23.3449	23.6189	24.335	19.5946	18.9903	17.5608	19.7994	22.9834	20.597	21.3127
22.1635	22.3896	21.8564	21.9082	20.5991	17.4152	22.6257	23.2948	21.4758	21.3062	20.8813	20.6103	18.6589	21.7072	21.9912	22.95	20.3993	20.2192	21.1049	20.6601	20.4574	18.6047	21.3808	20.1482	24.1346	20.5977	20.6446	23.4569	23.5603	19.5486	23.315	22.8523	23.3479	21.5627	22.0595	19.0379	20.9288	21.6914	23.8027	23.1828	21.386	22.9812	21.2235	20.3609	21.1179	21.4451	22.8985	21.8632	21.8712	21.0503
22.9706	17.9526	22.6303	20.4328	20.3544	18.3652	22.9605	23.1441	20.1167	22.7533	23.2909	20.3314	18.4179	20.6171	21.8382	23.7075	21.3165	20.7149	20.0593	20.9393	21.0974	18.0205	21.2276	21.3774	21.3315	21.9006	21.9441	23.8346	21.0527	20.9041	23.652	22.8231	22.2789	22.2755	18.959	18.4245	23.4526	18.4369	23.1614	23.2291	20.0512	23.1571	21.4341	21.4113	22.8283	21.3893	19.7303	23.2516	21.0481	18.6208
20.6307	18.0001	18.4322	18.9245	20.3785	18.1045	18.6625	21.3851	18.7742	20.7545	20.3388	23.7396	19.4591	21.1199	18.7325	22.1459	19.4457	20.0853	18.8753	19.0942	19.1897	18.4064	17.2706	19.4384	23.6687	18.6796	21.2092	22.018	21.243	19.5524	21.199	20.419	20.5164	21.6126	18.9936	18.9023	21.8522	20.678	20.3033	23.8577	19.0442	22.7104	21.577	20.4486	19.6787	18.1585	19.1624	22.2983	21.4727	17.9231
18.6666	19.2212	18.1345	21.3324	20.9977	19.0385	22.0461	20.1934	18.7865	19.4735	19.379	20.3589	19.266	20.2174	20.1231	21.4787	22.6041	18.9118	18.8174	19.8476	17.8344	18.0341	18.2835	21.7727	23.5846	18.4334	21.1752	20.6028	20.9431	19.6108	18.2901	21.1689	21.4523	23.4672	20.3833	18.6834	21.2886	22.7361	21.4711	20.6833	19.3429	19.0045	21.6696	22.7292	22.2521	22.002	20.2008	20.9163	21.0376	23.8268
23.0371	18.1853	22.4208	23.0987	20.4724	19.8255	24.198	20.477	24.4131	22.3516	24.6427	23.8219	20.8216	20.5287	19.8595	25.7825	23.7016	20.6586	19.1707	20.6671	20.8497	22.5826	22.8113	21.0373	20.7458	19.3209	20.5673	23.3922	24.447	19.202	23.9223	22.3358	24.7094	21.5762	19.5725	22.2111	20.2205	24.5	21.9628	22.8354	19.6942	23.2283	20.8619	22.2174	25.908	22.4111	20.9357	21.8843	23.5373	23.3317
27.3767	26.1733	28.8778	25.7167	24.7938	25.8347	29.9746	20.1953	26.8904	27.2469	30.8356	21.5273	24.7865	22.576	28.8906	30.8668	27.7416	28.4445	28.0106	26.54	28.3686	27.8798	29.6388	29.4174	22.9579	29.2061	21.5177	24.378	25.1867	24.7383	28.0451	28.9448	31.0511	23.9337	25.1598	26.6691	21.5807	30.3471	27.5487	22.978	25.3442	27.3584	24.3481	25.9971	28.739	29.7988	28.9951	23.4082	24.7521	28.5491
22.5698	21.7453	24.2856	19.9289	20.6343	21.5263	22.1316	22.9488	22.6739	21.7322	19.6748	23.044	19.2703	22.973	24.2811	21.9127	22.6713	18.8543	22.3866	18.4722	21.8545	18.0729	20.6939	24.4125	20.9263	22.2446	20.967	22.4396	21.5667	22.164	19.1732	21.5128	22.0627	20.5642	19.0277	19.6291	22.542	17.9063	23.2681	24.2099	23.1014	21.4612	21.8318	19.8861	19.9456	20.2942	19.9473	22.6348	20.4266	21.5882
20.5608	20.8894	20.8509	21.324	22.4067	18.6168	18.61	20.3471	23.2244	23.0945	19.2085	24.5065	22.6508	22.1013	18.474	18.5017	20.1511	21.1387	21.4798	19.4621	23.4704	22.4816	22.668	22.2703	20.6418	19.5769	23.5243	24.5572	22.8883	20.7367	22.7797	22.2737	21.2869	20.4175	21.8724	19.8965	24.7986	22.3155	23.0061	21.124	22.1868	22.1603	24.9064	23.2144	24.3715	24.6681	24.0466	24.5027	25.0675	25.0345
28.4386	27.9098	27.2811	27.472	21.8119	26.8223	27.9799	22.9906	26.8361	28.5614	29.687	23.6961	25.5133	23.6535	26.6311	29.5256	27.4481	26.9552	25.9113	27.4629	26.3429	27.8015	29.3437	26.4255	24.8731	27.0238	23.8308	24.7978	27.915	24.5504	27.9308	29.1028	29.0953	24.1365	27.4074	27.1182	25.7774	28.5507	28.3383	24.7964	26.6482	28.4969	22.4677	28.0948	29.1827	28.5604	29.5929	24.6454	25.3095	28.3641
21.2004	18.5046	21.6316	19.968	20.3791	20.7492	21.4723	22.8117	18.9907	22.868	20.1783	23.2348	19.3374	20.3861	22.4462	20.5489	22.8734	19.6376	19.6076	22.2867	18.5883	19.6285	18.0056	22.407	21.2335	18.0617	23.4756	20.568	21.5291	19.2422	18.9309	19.5917	21.1169	22.2305	19.4521	19.4537	20.9317	19.7973	19.3553	20.6255	19.6126	20.9382	21.1031	20.229	19.6172	18.6309	21.9338	21.0037	20.6704	20.0257
21.8841	18.0013	21.0691	20.8074	21.2256	20.6667	19.193	20.9083	22.3803	21.3089	20.1199	21.6666	18.8682	23.569	21.2725	18.7061	21.558	18.9555	21.2396	21.2592	20.653	18.7209	19.0015	20.5416	22.7144	20.6383	20.9131	20.2198	20.8577	20.2768	19.4444	19.0602	20.3444	21.1821	19.2577	20.8665	20.9594	18.3831	19.9454	21.7146	20.4515	19.452	21.3687	20.1493	19.1117	19.039	20.6507	20.2419	20.8738	18.8418
22.3019	21.8538	23.199	19.0419	20.9099	21.5393	20.7526	20.8042	21.9915	21.073	21.6029	21.0645	18.9144	22.3442	22.4872	22.4184	22.3259	19.2369	21.8144	20.4906	23.0286	22.0966	23.2745	22.2111	21.1979	23.1285	21.2213	24.7839	21.3487	19.3991	19.7992	23.7548	20.1549	20.4035	22.511	19.4576	23.4354	20.769	23.4638	19.5176	21.209	20.228	19.9452	23.2127	23.2422	23.2814	21.9129	21.1566	21.0118	22.7745
22.5308	19.048	21.7576	18.447	23.8684	22.5558	22.4296	21.6427	22.0123	19.7189	19.0757	21.7625	20.1016	21.0023	19.5398	20.2072	21.3534	20.5411	21.7172	21.8628	21.8686	20.2955	21.0941	21.54	23.3327	20.1824	23.7226	24.0236	23.6654	21.7645	23.0276	21.3573	21.7866	21.1435	20.0976	19.5185	22.8016	18.1234	22.695	23.7322	24.171	23.0373	20.9148	18.6234	20.0359	19.709	20.6343	23.4774	23.1579	21.0389
23.8119	23.7463	26.2008	26.0373	20.8779	27.2659	28.8588	20.8065	26.1368	27.2238	27.3277	23.9331	25.0048	20.888	26.9257	29.1617	25.5666	26.4997	26.6262	26.1342	27.7697	24.5532	26.2663	28.7859	21.9674	26.7298	21.184	20.3623	21.2992	25.3437	28.8887	28.2839	28.9119	23.7948	26.1783	26.1739	21.5539	28.4292	28.9708	19.8807	25.5868	21.9901	25.2101	25.099	19.8103	29.0076	26.194	20.4694	22.1569	27.1299
19.4551	19.7336	18.1956	24.3172	20.3064	23.4691	24.8243	20.8427	19.7227	26.7582	24.4977	20.4659	19.0944	21.8085	19.4004	26.1216	19.7902	23.4133	24.5118	23.2474	25.6644	21.7474	19.8406	23.3143	25.7013	18.7622	25.1811	21.4098	27.1168	19.6697	23.3299	24.4988	23.9902	26.8928	24.0637	23.9725	20.3036	24.5908	23.4067	23.9699	23.9377	22.8592	21.9248	22.9501	21.5782	21.9964	24.6081	24.4597	24.5715	22.6855
23.3917	22.0308	25.0922	23.8979	20.6822	24.6831	25.1633	23.2044	24.6835	18.2727	19.7622	21.1253	24.3327	25.7495	25.2783	24.2585	24.5116	23.508	24.9473	23.3098	23.9977	18.1111	18.5518	24.8462	20.5607	24.6994	20.1483	24.4994	24.8014	24.413	25.0552	23.8742	22.4498	22.0256	23.5612	23.4458	22.8488	25.5277	25.1833	24.374	25.3322	27.1599	24.0612	22.8075	21.144	22.2701	24.0689	20.4338	21.1013	19.193
21.3355	21.2404	24.6498	20.3496	21.7829	21.9802	24.019	23.7642	24.4144	23.8112	25.396	20.6504	19.4049	20.8905	22.5923	25.6028	22.3958	21.3783	21.9405	20.7167	23.1784	18.5861	18.4887	23.4966	20.9796	22.9533	19.9981	23.5743	24.9172	23.7055	24.0874	22.823	23.024	21.8601	19.9418	21.0365	19.8824	24.2304	25.7607	21.361	22.7436	25.6477	20.6743	24.7229	25.0278	19.0474	19.6817	24.7758	23.2641	19.606
20.8485	18.9849	22.4856	22.8878	22.863	22.0854	24.4146	22.7978	20.7337	23.029	19.6697	20.3596	21.0956	23.6411	21.4915	20.2097	22.1152	22.7794	22.6881	22.9444	22.482	22.2358	19.3489	20.6194	23.1758	21.6307	21.8537	19.7168	21.2397	19.2433	22.017	19.4113	17.392	24.0442	21.1967	19.0924	23.0034	20.5366	21.8122	20.9245	22.2074	19.9632	20.5172	21.7998	20.4363	17.8638	20.0617	20.7198	20.3212	19.51
23.5368	17.858	22.1618	23.1322	20.6315	23.5045	22.1974	20.5898	22.3604	23.3955	23.4766	20.9644	18.9156	20.9302	23.216	22.2584	21.0691	23.8039	23.5893	24.2111	22.3872	18.3685	22.6745	22.2982	21.4455	21.5529	20.7807	22.8904	22.0345	23.2754	21.8226	19.0726	24.5336	24.4724	19.9453	19.1343	23.263	23.3857	24.4141	20.3427	21.1225	23.1171	21.6058	19.1235	22.9695	21.3729	20.3789	19.3773	21.258	21.0551
22.9111	18.5989	23.864	18.84	20.9212	22.8842	22.3574	20.6147	20.5541	23.7335	20.1991	20.928	21.9758	20.6526	22.9379	22.8465	23.8715	23.2149	22.5881	21.9192	22.0101	19.3087	18.9088	21.9524	20.9232	23.0754	19.9838	20.3965	21.58	22.5344	25.3363	21.5762	19.3256	21.202	19.9994	20.2126	20.1607	24.0744	23.3533	20.3015	23.4449	24.3729	20.5065	25.5069	20.4217	17.088	20.5941	23.9704	20.5541	17.672
24.5205	21.3843	23.5662	22.8282	20.9336	23.4166	23.585	20.7117	24.4554	23.3316	24.1021	20.2767	22.8306	23.038	23.5193	22.4294	24.1893	23.7187	23.8773	24.757	23.7411	20.8678	22.1399	24.7131	22.9998	23.0735	21.644	20.704	25.1226	21.8557	22.145	22.4984	22.8374	23.3433	22.421	22.4749	19.9202	20.0268	23.086	24.303	24.2267	24.0756	22.8038	24.7147	19.9121	20.2134	19.5173	21.2443	21.4118	20.3667
23.4943	22.4398	21.9064	18.5004	23.5866	22.0163	22.8056	24.5976	24.6674	23.3482	18.3559	25.0457	23.8427	23.5115	21.7213	23.4155	21.3697	22.2666	22.0224	18.4998	23.5145	20.539	23.5111	24.5847	24.3913	22.6154	25.13	23.5299	20.395	25.1954	22.8736	24.1005	23.7411	20.8461	19.6582	20.3547	25.1777	22.7921	25.8255	22.0659	22.3979	22.5642	23.7745	19.9888	20.1944	20.0493	20.9905	24.7383	23.2805	21.3826
26.3873	22.9294	25.8795	23.5954	25.3736	25.7363	26.5677	24.5966	26.0815	26.6984	24.2332	25.7843	23.3809	25.4578	25.8898	25.0773	25.5533	24.7368	26.2772	26.2107	26.2536	25.0235	24.1352	26.2228	26.0725	25.0443	24.3329	24.9838	23.9027	25.5275	25.3438	25.3441	25.9404	23.3337	23.8736	23.6784	25.7924	24.2904	26.5868	26.1688	26.3313	25.7201	24.0238	24.4143	24.666	23.9559	21.5509	24.4653	24.0728	23.8753
22.9246	19.0704	21.7431	20.0844	22.3515	21.529	22.2579	21.9711	22.4268	22.0198	18.0981	22.6635	19.8719	24.5408	23.1178	19.439	20.2479	18.2364	23.4835	19.4661	17.2184	19.1382	19.4669	21.0737	24.0396	22.1868	24.2612	23.0957	20.2292	20.0766	22.0276	19.1079	21.9754	24.1712	20.6159	19.5798	21.0419	17.1397	20.6183	24.5222	18.5616	22.4852	24.1725	21.8926	20.3859	18.1094	20.9778	23.548	22.9854	19.041
23.8889	23.2239	24.767	22.7162	25.2827	23.2273	22.8786	21.5183	24.6617	22.7941	20.2984	23.6154	21.6281	24.341	23.9077	22.5842	23.2096	22.8861	23.5748	23.4433	23.5803	21.9229	17.8101	25.0964	24.2647	23.1769	24.4824	22.8851	22.2784	23.8974	23.4888	23.461	22.6897	21.6825	21.964	21.7014	22.941	20.8363	23.0693	22.3221	24.2744	21.2102	24.3811	21.2262	21.4193	20.7881	21.8033	20.7549	23.7497	22.67
19.2387	19.0013	18.7873	19.1602	20.8862	24.2653	20.5188	20.8791	19.1367	18.8658	21.2853	20.7049	18.7762	23.7654	24.2246	17.7797	18.8892	23.1865	22.724	25.024	17.895	22.0976	18.9133	24.1525	21.8872	17.4893	21.4746	20.8783	21.0934	19.1218	19.4071	20.523	18.0413	20.2594	19.8034	22.1662	20.3874	18.1755	19.4985	20.5825	19.2136	19.2549	22.1151	19.703	20.51	18.4998	19.8805	20.065	19.4357	18.9725
20.014	16.8029	20.4655	18.5393	19.7713	19.3644	18.0857	20.6153	20.6243	18.9985	19.4422	20.6472	21.0829	21.3825	19.9052	18.7552	21.0349	19.241	18.1197	19.5037	20.5271	19.1988	20.5954	19.9451	21.2071	20.9817	20.8011	23.7997	21.0497	20.4501	20.7262	21.3957	17.7126	21.5315	20.0539	19.1354	21.9474	17.8913	20.8182	20.6577	19.1553	20.1417	21.2874	19.2358	19.4276	18.959	18.1368	19.9168	20.5625	18.4097
22.5094	20.3818	23.9411	19.023	21.5158	23.1573	23.7081	24.4603	24.3286	23.9993	22.3932	22.4459	19.4966	24.7438	20.181	23.6663	19.7939	22.9073	22.0702	20.3114	24.0526	18.7751	18.9563	23.9948	22.9349	24.7865	20.3794	23.3244	23.015	23.6861	25.574	19.6974	22.9232	21.2844	19.6592	20.0597	19.9477	22.7583	25.6309	21.8222	22.7379	22.6139	21.6834	20.0901	20.4157	23.6652	23.9846	20.9435	23.2701	19.4387
22.4034	20.2427	22.2248	18.8014	22.2294	18.9516	22.7741	21.1639	24.3071	18.6979	18.0735	20.9773	22.3153	20.7865	22.3713	19.8654	22.4776	21.2058	22.4127	18.6127	20.7846	18.8168	19.8784	22.2786	24.4374	23.5602	20.4367	23.8996	22.0468	23.8277	22.4052	19.1426	21.6031	23.8445	20.48	20.004	23.2111	18.9098	21.3407	20.4311	18.6766	19.659	20.4312	22.8686	20.7274	18.8523	19.5969	19.9067	20.3722	19.1875
23.9228	18.2536	23.8466	23.6951	20.507	22.8591	23.4882	23.956	23.7747	23.7715	19.3743	22.9995	19.3995	23.5802	23.8119	22.1286	24.1556	23.412	23.8769	24.7762	24.3699	23.5955	17.939	24.2339	20.1215	23.448	21.2928	25.2774	21.8597	23.2862	24.035	19.5747	22.2082	21.2932	23.6394	23.8885	23.5339	22.7039	23.4389	22.388	24.0093	23.8362	21.6228	23.4969	19.7508	16.8089	21.1178	20.3383	21.3478	21.156
22.913	23.7639	18.8157	19.7588	24.8693	20.295	18.3002	24.8309	25.4726	19.4103	20.7465	22.5863	24.143	20.9702	22.8147	23.3167	22.7543	23.8946	23.5543	18.0404	27.556	21.8701	23.2805	22.5082	24.0338	23.6704	23.8291	24.6318	23.3477	25.2259	25.9028	22.6839	18.5224	20.8704	22.2496	21.2675	25.6028	23.965	27.5424	24.5198	19.5519	23.1647	25.5024	23.9532	20.1067	24.2113	19.2348	22.7086	24.2	19.8845
24.1356	16.7764	21.5509	21.8261	19.7579	22.7399	19.8776	23.5756	26.3592	23.811	20.9251	20.9374	24.0709	22.3545	20.9177	23.1035	25.7655	22.0801	23.2284	18.4185	24.9723	22.031	23.5328	24.3953	19.9642	23.965	19.8363	22.6412	21.1159	23.7541	22.2018	19.3768	19.2914	25.1085	23.1638	23.6915	23.0379	20.9888	25.1159	21.6176	19.3382	18.9061	23.6334	19.8816	22.6254	22.9719	18.9982	21.4238	22.3329	22.2676
22.8666	20.7008	22.3237	19.5812	23.9729	19.475	22.6063	24.8963	23.2204	21.3949	22.9245	24.6553	19.955	24.4835	18.9821	25.8479	19.8292	20.6006	20.5192	18.0537	20.1366	21.7966	24.3029	20.4748	21.909	20.2274	24.1602	20.7845	24.4159	19.7496	24.0259	23.1985	24.7203	20.5289	20.4306	20.328	20.0461	22.8971	24.4238	24.1548	19.8799	25.9628	21.9337	21.5158	23.8845	23.0588	21.2711	24.4018	24.6846	22.501
21.6095	18.1803	18.5857	21.0115	20.4698	17.9212	17.3283	21.1308	22.5388	20.9429	20.6341	21.3916	19.8878	20.6806	21.0823	21.3111	20.5854	19.2801	19.716	18.0918	21.9731	19.8889	21.9567	21.5597	20.7844	20.4933	20.6329	23.8269	22.648	19.665	19.3521	20.2321	20.3348	20.1806	19.5467	19.0088	22.4593	20.1491	22.9328	20.8512	21.0127	20.1455	20.6647	20.4602	18.199	22.7391	20.6375	20.6431	22.0226	19.8683
20.6672	19.8539	19.415	19.5851	21.3186	18.9559	18.3517	20.5402	20.1037	19.3636	19.4773	19.8279	18.0209	21.2828	18.9234	18.4876	18.995	20.1198	18.194	19.6158	18.0464	18.9794	17.2856	18.1062	19.9492	18.1179	23.3257	21.5985	20.6503	20.149	20.1021	20.0734	18.1867	20.5972	20.1278	19.6631	20.2902	19.7679	22.6376	20.8414	19.9311	19.812	22.435	20.4467	19.4984	17.4786	18.982	21.0166	23.2678	22.4181
19.6639	19.5399	21.9427	19.6468	21.1593	18.9961	22.0574	20.9285	20.4577	18.8981	18.753	19.6671	17.7503	22.5612	22.3145	19.4467	18.4591	21.2993	21.8597	22.2685	22.9068	21.3335	17.7173	22.3819	20.7429	18.2587	21.3251	21.4413	23.2435	20.0904	19.7184	21.3512	17.8575	21.1387	20.0495	19.575	22.379	18.4499	18.6777	20.2724	19.9173	21.7354	21.3245	19.6631	20.852	18.3308	19.6712	19.8357	20.14	18.9243
27.1286	26.6938	26.743	26.8676	20.5262	26.5344	29.1376	20.8762	26.2245	27.9035	28.7676	21.6548	25.3123	21.2466	28.2282	29.5075	26.8977	26.6948	25.6071	25.9279	26.2563	24.9198	28.1607	27.4026	21.6892	27.7525	21.1383	24.6615	22.2191	25.0012	29.0409	25.7345	29.9948	25.7178	26.9654	27.2502	23.1324	29.3725	27.9316	20.4994	25.0387	27.0204	27.094	27.3241	28.3449	30.0074	28.9631	20.9595	19.9882	29.1999
28.0969	26.3802	25.5102	26.8096	20.1298	25.8438	28.2933	22.5693	26.2242	28.3895	28.6553	20.5053	24.6941	25.5457	26.4945	29.5335	27.1119	25.5409	24.62	25.9603	26.0751	25.9401	27.7208	26.703	21.5117	26.406	20.8853	25.264	24.3147	22.6012	28.0438	28.915	29.1846	24.9157	26.6343	27.3375	25.7601	28.1703	28.5248	23.3032	26.2774	28.0378	24.3275	26.4348	28.3247	29.5422	26.8782	19.251	23.8935	28.207
19.6148	18.2914	18.2384	19.2155	20.1837	19.861	21.7489	21.1756	22.3062	19.0885	18.8515	19.6518	21.0948	20.5982	19.7236	20.2549	18.8131	18.3538	19.2075	18.7266	17.7034	19.2598	17.3008	18.8472	20.8058	17.94	20.8944	20.919	23.0433	18.4638	20.9672	20.0769	20.274	20.9692	20.4976	20.0794	20.1333	20.5508	20.4187	20.6889	19.1144	21.4627	20.9037	19.9757	21.5698	21.7009	21.4044	21.2527	21.2186	19.3009
21.6577	17.5097	22.5065	21.7713	23.7176	19.3232	21.8606	23.4615	24.1923	21.8833	20.3219	21.0103	23.1767	22.8777	19.3142	22.3895	22.3556	22.8761	20.6231	18.1292	23.9444	22.2373	21.8422	21.8849	23.1356	22.5517	24.3855	23.2519	20.7136	21.9471	22.6202	20.1321	22.9017	22.309	22.0525	23.1497	21.5242	23.9003	24.6845	23.6728	20.7852	23.2327	24.8612	21.1118	24.0179	23.457	21.6281	23.6891	25.6881	25.5175
21.3655	17.616	25.0159	25.2183	24.1128	20.6526	21.9263	24.8728	23.7096	25.353	17.82	24.9744	24.7527	25.2678	20.1582	22.6338	23.2415	25.9447	25.7325	23.0193	27.1785	23.8605	17.3442	24.0194	24.4564	23.0871	23.1758	19.7007	23.6049	24.6286	24.5216	22.6891	20.3576	23.3024	23.5587	24.2936	24.7897	21.3369	26.7602	24.218	24.7659	24.7061	23.7024	24.8839	19.1762	21.0639	20.1579	20.0559	21.0397	19.6152
20.2844	19.203	20.2486	19.2579	20.9885	18.0421	18.0709	21.1394	18.9366	20.4894	19.1884	20.463	19.1608	21.0245	20.6467	19.0136	18.4716	17.7588	19.2469	18.5945	18.5162	18.8179	19.0842	17.5006	20.3638	19.2672	22.3254	22.7091	21.659	18.228	20.205	19.7467	20.6661	21.8812	20.4434	20.0184	22.1983	20.4969	20.1886	20.8174	20.4737	20.3883	20.4174	20.2366	21.2346	21.2945	20.7543	20.6781	21.7424	22.8502
20.7921	17.9797	22.0167	20.5057	19.6192	17.4292	21.1505	20.1331	22.2523	21.2304	20.0565	21.4301	17.7246	20.967	19.742	21.7658	20.4776	18.1519	19.8704	18.3813	22.7628	19.7368	18.069	24.9651	20.4239	21.9811	20.4617	25.8231	22.6996	21.5784	22.4514	21.1479	21.8041	21.0229	21.894	19.8483	24.8166	23.8371	25.5412	20.9007	20.2632	18.9547	24.0704	20.4137	18.9656	22.4635	20.663	20.2813	22.6742	19.8284
25.3014	22.0662	25.0641	23.7918	20.3681	24.8613	24.7672	19.9873	25.3451	24.7455	19.622	21.2486	23.2421	25.9482	25.6621	24.51	24.7473	24.5203	25.2385	24.4767	24.1441	23.4347	17.3869	24.7039	23.3682	25.9823	20.1121	25.8241	20.0504	26.616	25.8502	23.4664	23.4108	23.5758	23.8671	21.3476	25.3234	23.3676	24.8223	20.1743	25.6885	24.322	21.9957	25.2732	22.1019	22.6434	24.0981	24.7272	19.9778	19.9666
19.9418	18.9165	22.0666	27.4829	23.4521	24.109	22.9296	21.79	24.0331	18.2254	19.6376	20.5272	22.8064	23.3117	23.0681	18.9528	18.5072	25.393	26.761	19.3025	25.8841	20.5121	17.9182	18.1657	21.3212	21.3228	19.7556	20.5765	23.6649	24.1879	20.5242	21.8581	18.6374	21.3588	18.9375	26.5185	21.7556	22.4167	21.3099	21.0466	19.4347	19.4669	23.7694	24.7052	21.65	18.2547	21.1311	19.8227	20.4199	18.7614
21.549	19.7008	18.8929	20.7587	20.8432	20.0201	20.8232	22.5495	22.6082	21.4492	22.908	23.4842	19.0895	22.8976	19.8334	21.2281	19.934	17.7727	20.0941	21.1042	18.463	19.6815	20.3352	21.1128	21.2757	18.6457	21.6555	20.5342	24.7399	21.1422	21.726	19.7846	22.2273	21.2831	18.7192	18.3229	20.8113	20.7743	21.1484	22.9901	21.1152	23.7264	20.8581	20.5284	22.9	20.724	19.2203	21.2435	24.6758	20.6446
21.0569	18.4476	17.7035	19.4235	20.6054	17.8341	19.0772	20.7475	19.3031	19.1343	18.8943	20.0755	20.7169	21.2957	18.2921	19.7813	19.1016	17.8122	18.3124	19.1316	17.9318	18.692	17.6748	18.3146	21.7319	18.1522	23.0418	21.1114	20.9302	19.457	18.7604	20.7598	18.5864	20.7178	21.417	18.0772	20.6855	18.3854	18.7507	20.3912	19.702	19.7167	21.2874	19.5278	20.4246	17.629	20.2138	20.0819	22.0466	20.2087
20.3763	18.4644	18.2909	19.7089	19.6535	17.4435	19.925	19.9734	19.0322	20.0818	18.2938	20.1369	20.4115	21.0445	19.3184	19.3574	18.5422	19.3966	17.7121	20.5078	18.1491	19.3426	18.7265	17.9774	23.8473	18.3541	20.9378	20.8161	21.4884	18.2055	19.2974	19.9325	18.0767	21.6893	19.857	21.1146	21.6984	19.265	19.7958	21.9085	19.8834	21.9744	21.1715	20.1614	18.9513	18.773	19.5802	20.8215	21.5316	19.1213
19.0865	17.6622	22.3997	19.259	23.4359	20.369	22.5257	22.0513	22.3316	18.8849	17.6815	23.3782	19.1976	22.7358	21.2195	22.3779	20.3187	22.4622	22.4304	20.5818	22.4275	19.2549	18.5314	20.124	21.5614	19.8391	20.182	21.7772	24.0081	22.3627	22.6804	20.1875	18.2852	24.3512	21.7094	19.3582	22.7801	20.3177	22.7305	20.63	22.6133	22.7345	21.4352	20.9567	19.5646	18.4937	18.848	20.2383	20.7321	19.5175
19.9454	17.0142	20.2073	19.8011	20.6139	17.4842	18.6228	22.3791	21.1868	19.7786	20.6293	21.7189	18.4375	22.2967	19.3584	20.737	18.9779	21.4004	20.7278	21.3253	19.6424	19.7565	20.1026	18.7763	19.7945	21.5351	20.7362	21.1906	21.209	19.3949	19.5374	19.7856	19.8188	23.9468	20.7946	21.0282	20.6883	19.8822	20.205	19.3497	20.001	19.1432	21.0922	20.7293	21.1071	20.6822	19.5115	20.6432	21.1146	17.3935
19.9788	16.3533	18.4224	20.1947	23.3542	19.1161	18.559	20.806	19.0878	20.5315	18.4139	22.4468	18.5409	21.2559	20.2162	19.895	18.7783	18.4722	18.1087	19.1354	19.7474	19.6958	18.5357	18.724	20.8402	17.4391	20.5627	21.4583	21.219	20.8128	20.2515	20.6215	20.5711	20.282	18.6984	18.0538	20.732	18.815	20.8982	21.9581	18.9758	21.046	21.3615	19.8266	19.9978	19.6855	20.158	20.9799	20.4554	21.9179
22.4821	17.1438	21.655	21.1048	23.3177	18.164	22.9751	24.9742	24.9057	23.797	19.3659	25.4744	24.3528	25.298	18.4121	22.6276	19.6407	22.6544	21.5707	20.2996	26.6373	22.2927	23.3824	22.7229	21.6288	21.553	24.7087	24.6737	20.7411	22.7233	24.8348	24.7311	24.9403	23.8524	23.6718	22.6456	25.8279	23.879	26.7859	24.774	25.6918	25.2815	25.5349	24.6899	26.0555	25.4199	23.5028	25.0365	27.3237	27.6293
26.1274	26.9268	28.3564	25.5369	22.816	25.453	26.4391	20.7091	24.8264	27.2177	19.0679	21.0539	25.5524	16.8184	27.1197	26.6061	27.6292	25.5123	24.5685	24.4954	26.2031	24.8645	18.6035	28.668	20.6295	26.2775	21.4961	26.8915	20.3551	27.7729	25.2883	26.5536	24.9841	21.0417	19.7995	25.2328	26.8996	26.9466	28.2111	20.2218	26.516	27.8287	21.2661	20.1556	20.5285	24.4178	29.826	20.5339	19.9052	18.8403
26.6666	27.4494	25.9329	26.8822	19.0676	26.4816	25.9488	24.606	27.7143	27.0983	27.2573	25.4747	26.9858	22.9584	27.0847	26.3592	25.7749	26.7175	25.7527	26.1592	27.3985	26.4529	27.7746	26.2823	21.1592	26.5376	20.6178	26.6811	26.2071	26.6178	26.9463	26.8563	25.0672	24.9665	27.8044	26.4341	22.8056	25.8211	26.9555	21.1302	26.3163	27.03	24.7691	25.0659	27.9901	26.9924	29.6651	23.4953	23.7786	27.9165
22.8301	18.1712	22.5569	21.7847	21.3232	23.5326	22.9212	21.5862	24.3553	22.7455	22.7182	19.4937	21.2303	23.0459	23.1462	24.8031	23.7273	23.1685	23.5443	23.7886	21.487	20.8922	18.6906	23.9788	20.8941	22.6953	20.9615	23.5324	19.9614	22.7756	24.1125	22.8084	22.0369	24.4727	22.924	19.2934	22.2902	23.6765	23.3058	23.1662	23.8853	23.9408	21.092	24.4221	18.8504	19.2686	19.9835	22.5106	21.0561	20.3474
20.6967	17.8496	20.8284	19.6253	20.2071	17.5243	19.4282	22.9888	19.6262	19.375	20.6712	20.3471	20.0839	24.5023	17.8042	22.2096	19.4808	17.8511	17.7261	19.1948	17.1644	18.0101	18.1297	18.2019	20.9036	21.9781	20.8841	20.0788	20.4323	20.5468	19.7223	20.5712	21.6637	20.711	21.1121	20.7713	20.4265	20.2798	18.4464	20.0055	20.2069	22.0255	21.6269	18.3921	21.3592	19.7173	20.3805	22.1238	22.6511	18.4815
24.3913	19.8558	25.5167	23.9373	22.7564	24.6753	22.7787	23.9502	24.2463	24.8341	19.1624	22.1422	21.8785	23.4044	25.1987	23.7505	24.3208	24.5451	25.2616	24.6931	24.4159	24.7447	22.9335	25.7965	20.5393	24.395	23.6027	22.7255	21.0443	24.5715	23.0109	23.7414	22.838	21.4875	23.7367	23.9867	23.4475	21.1557	23.5938	19.8642	25.2429	24.5702	23.5865	24.9224	20.4473	19.2506	19.864	24.2285	21.3563	18.247
19.1869	18.7139	23.527	22.3224	20.8924	21.9853	21.6743	22.6275	23.5898	21.6764	19.7528	24.4029	25.5781	20.1513	21.9906	18.2993	22.2885	26.399	23.7835	19.8535	26.7627	17.7657	18.1763	27.0397	22.0498	25.5551	22.8916	23.9156	20.8527	24.5872	24.5861	20.4876	17.3402	20.3794	21.5142	20.2071	24.4856	22.4082	24.9123	20.8078	25.7275	20.0231	23.4206	22.1701	20.8639	18.2011	20.1259	20.7825	20.1307	19.8715
22.2966	19.5799	23.5899	23.1487	22.6577	22.8112	22.9365	22.9507	23.9437	24.3481	23.8155	21.5676	22.3897	24.3682	23.4869	24.6052	23.8579	23.1199	23.1423	23.6116	23.2147	23.0427	19.3754	23.5001	20.45	22.6278	24.6252	24.4942	25.1365	21.9977	23.0994	22.3068	24.3245	23.4699	22.4063	22.937	23.3476	21.5696	23.9369	22.716	23.7829	23.2373	22.8796	19.5933	23.4335	21.5439	22.9351	23.5444	23.1942	22.4256
22.3319	17.9515	24.6309	23.0511	24.6532	23.4734	25.2656	22.3782	24.7735	23.7485	19.6199	21.9626	23.246	24.0513	24.6403	24.7976	24.3082	23.7786	24.2007	24.3047	23.2186	21.3921	22.5722	23.9761	24.7049	23.323	23.7386	24.6535	22.7554	23.7304	23.4033	23.9782	24.8835	22.4338	23.3818	23.3032	24.4146	22.8478	24.9096	24.0042	24.7153	24.0473	24.673	21.6464	19.1633	21.0567	23.6784	22.5786	20.7679	21.2256
22.7457	22.437	22.4419	22.9034	23.9569	21.4266	24.5104	22.2395	24.9556	24.23	24.6302	24.8705	17.4586	24.1825	18.2058	25.9726	19.5649	22.8507	17.766	22.1031	19.6461	22.7879	23.6193	21.4554	24.2996	18.4026	24.4939	24.2063	25.665	20.1195	24.5301	22.603	22.7716	21.0361	20.8489	20.494	23.3123	22.1291	24.3923	25.1518	23.0558	26.08	20.9813	21.7183	25.258	21.5284	23.8257	20.7648	23.1317	22.9537
23.0199	18.4453	25.5629	23.752	19.8785	18.0226	18.9835	21.4216	19.6521	21.4327	23.3339	23.9252	19.8054	25.458	17.8184	25.5329	20.7692	18.3349	19.3644	18.7797	18.2013	19.0393	22.6608	18.4155	20.0836	23.1498	20.3055	25.5237	23.8943	19.489	24.3404	25.4199	18.3353	20.7315	19.8867	18.7013	21.2296	19.3857	20.5972	24.6616	19.2819	19.1179	21.4627	20.8445	19.4836	20.8957	20.6692	23.9953	23.7256	18.9139
24.1878	26.1031	27.5506	28.7661	19.5433	27.3357	28.9124	20.7673	28.9153	26.0586	27.5586	20.8884	28.6828	19.9911	27.938	29.3866	28.279	28.8275	28.6175	27.1455	30.6085	28.1503	28.0605	31.5269	19.71	30.9118	21.2998	26.2291	23.5387	25.4443	26.0509	28.929	30.0501	24.2664	21.1992	27.9936	25.1288	30.8833	29.3307	20.8433	27.5734	26.8782	21.4888	30.2694	26.99	29.4946	26.0892	20.459	22.346	28.09
26.4836	25.1812	29.7363	26.8106	19.9442	28.452	26.6056	22.3136	27.8682	27.5292	26.8764	24.4457	27.0419	23.7124	27.6969	25.6569	26.6663	27.605	29.7017	28.9068	28.7829	26.9678	28.5304	27.683	24.4215	28.2944	21.7363	25.9897	23.0374	28.4541	24.0503	25.4686	28.092	21.9992	26.5701	25.9272	24.8431	26.874	26.6044	24.9201	28.2036	27.7016	23.8988	25.1253	24.1355	24.8177	22.6918	23.3558	23.909	25.8656
26.5627	24.5918	24.615	25.2154	24.6166	23.764	25.8039	25.1698	25.2356	26.9635	27.7808	25.7878	19.3495	25.2588	22.6925	27.0546	24.8637	24.8128	22.8191	25.3924	24.2458	25.5008	25.7816	23.9591	25.1279	22.6304	21.8265	25.9007	25.5235	18.8268	25.3903	26.1067	26.7431	24.9327	25.0743	24.6545	24.2879	26.1772	26.0753	24.1503	24.935	26.5903	23.9234	26.199	26.4149	25.3182	24.3151	22.8311	24.1785	25.5523
24.03	17.3727	26.0649	24.5332	20.4652	23.5197	22.9157	21.8988	22.6627	24.9598	23.41	23.3573	22.6959	26.7576	23.4812	25.6618	24.6097	24.4373	22.9156	24.342	23.3379	24.1955	24.5117	22.6413	20.1569	23.3052	22.5748	24.809	23.1491	22.8536	23.6855	24.7876	25.7245	23.5458	23.731	24.928	20.5738	21.5972	24.5722	24.1197	22.2546	25.2383	21.1213	24.4543	24.1836	24.2598	19.6971	23.7062	19.8918	24.7269
25.5046	22.9285	22.3218	23.6296	24.4302	23.2415	24.5814	25.3463	25.5055	26.1951	23.7157	25.3927	19.4777	25.72	21.8794	25.7866	22.3461	23.1556	22.2192	23.0763	20.262	23.3435	23.5572	23.1097	27.3978	21.5248	24.6224	24.1146	25.3619	22.3961	24.5851	24.755	25.8019	24.8094	20.2565	21.5838	20.776	22.9319	25.4173	25.0379	23.8003	26.7261	20.174	25.4852	23.099	21.3501	24.0851	25.0306	24.4673	23.082
23.0906	19.2159	21.7972	21.7428	20.3021	20.1769	24.0567	22.7509	23.1359	19.3184	22.4034	20.6175	19.3658	21.9702	17.8588	22.6785	20.354	18.1133	18.4318	18.8206	21.388	21.9307	21.255	21.8713	20.7378	21.1225	19.8595	20.8191	22.8242	18.9168	23.0072	22.7285	22.5763	21.6869	19.2736	18.7952	20.4574	19.6799	22.7633	19.8545	21.4945	21.8226	20.6553	19.2954	21.4649	21.2993	19.1493	20.6231	20.3175	20.6314
22.8258	16.5459	22.3899	19.1308	22.9171	23.0566	24.4765	23.0821	23.2012	19.8887	20.3339	24.3157	18.5858	24.3458	24.897	21.036	22.9972	19.8664	22.7048	22.8098	22.4138	17.7424	18.6717	24.2986	24.8995	23.1409	21.3184	23.6542	20.9135	22.7578	22.5371	19.6711	21.1669	21.1185	19.3569	20.1965	22.8438	21.54	21.9874	23.1167	23.1655	20.8341	22.2926	20.2186	18.8319	21.1782	20.4612	20.4589	21.3564	19.3962
20.9069	17.9873	18.1247	19.7932	21.1796	17.7943	20.4308	20.3577	19.4428	21.214	17.8599	20.6272	17.9557	20.8258	19.4774	18.3141	22.085	19.0708	17.8052	19.8708	17.9168	18.975	19.1612	19.9865	23.2758	18.1382	20.637	21.3198	21.2931	20.2613	20.4865	20.2629	21.9962	21.9691	20.6016	17.8122	21.12	19.6675	18.87	20.2662	19.619	23.3936	20.2299	21.5576	19.4225	18.9692	19.9079	20.9634	20.7321	19.9871
24.7597	18.833	25.7694	24.0038	20.3538	18.7806	19.5474	20.4134	20.1975	20.0903	19.1955	21.4019	17.3132	21.9961	18.533	26.5891	19.4843	18.8932	18.2933	18.9799	18.9364	20.4444	22.4884	20.8827	20.556	24.2749	21.0932	22.0063	21.2076	17.9738	23.6412	26.9374	18.0623	21.6188	21.4882	19.1163	21.0801	20.2973	20.7818	23.647	17.8122	19.6231	20.2962	19.1008	19.9978	22.7915	18.4815	20.3545	21.0426	18.1187
26.5593	26.2059	25.8101	24.6153	21.6734	24.4123	25.4292	24.7725	26.2968	27.5986	25.9507	23.0519	25.3365	24.1432	24.4523	27.5245	26.0961	26.4025	25.4462	25.2493	25.9501	25.4679	25.5221	24.6212	24.6182	25.5306	23.8037	26.6578	26.4548	25.9448	26.8045	26.9042	26.2529	21.4028	24.6037	24.1765	23.7783	26.2578	27.9164	25.6518	25.7569	26.8416	22.7598	26.2499	22.9521	24.8171	26.7502	25.2276	27.1748	24.6984
22.1052	16.7307	18.8302	19.704	20.677	18.5977	17.8734	24.5636	19.1267	19.6954	25.0989	25.8575	18.0818	25.6592	17.8985	23.555	19.5399	20.8391	18.0697	19.2545	23.6387	20.1687	18.1775	22.6515	26.7237	19.0855	25.9122	26.2684	26.3364	19.2249	22.8318	24.7848	19.0406	21.1003	25.4378	19.9436	26.0634	17.6914	24.9879	21.3014	19.0429	22.1426	20.7864	20.4494	19.8425	19.2063	19.2062	24.1278	26.0375	19.8967
22.755	17.9766	23.5756	20.2147	20.6042	20.0712	18.9881	21.2451	22.5314	20.9807	19.9791	24.9369	19.0807	23.9222	22.1609	21.0799	19.1513	20.3239	22.147	18.8216	20.8904	19.0726	21.5748	22.3589	25.035	19.8837	19.9592	24.4571	20.5687	20.0187	22.0931	20.961	19.865	21.299	18.4839	19.5295	20.3666	20.3838	22.3499	23.3577	20.3249	24.2883	21.8302	19.0875	20.1958	19.3599	22.8567	20.0114	23.4337	20.3606
20.017	19.3037	20.9843	20.1529	20.0603	20.45	19.0315	19.83	20.2801	21.1234	20.1297	20.1636	18.768	19.9759	19.2564	18.8323	20.2996	19.7651	20.2021	21.4786	18.3759	18.3863	19.2053	19.5235	22.7441	18.6578	20.6313	20.6533	21.6667	19.6214	19.7598	20.1831	19.7857	21.2646	19.6421	19.5443	20.8357	18.8196	20.1807	21.5557	21.2828	18.869	21.7832	19.6544	19.7362	18.0201	18.5655	22.3489	20.6202	18.4671
22.8586	20.9465	23.6352	22.6495	23.5385	20.5449	23.2061	24.3311	23.0331	21.2984	18.0311	19.7892	20.5676	26.0021	23.3909	22.9088	23.2675	23.0884	23.0037	22.6861	23.0537	18.4796	19.1434	23.5065	24.2211	21.2056	22.8048	24.0459	24.0763	22.1564	23.0459	23.5306	20.6866	23.7201	20.3769	21.3501	22.9088	21.1871	23.183	24.2135	23.926	21.5764	20.6772	22.5513	19.9693	19.629	23.4264	21.6259	20.8748	19.4516
18.6782	17.3986	21.9941	21.1735	21.8252	18.6017	20.1714	20.604	23.042	20.4338	22.242	19.4073	20.4504	23.1673	22.0902	22.0648	19.1895	21.93	21.444	21.1027	22.504	19.8729	18.0367	17.4476	22.9299	18.5978	22.8815	20.8479	22.2985	19.6356	20.3595	20.6394	18.5988	21.3976	20.6506	18.836	20.7725	18.8635	21.8448	20.5569	18.7377	22.0747	20.7894	21.0803	19.736	18.4201	18.6655	20.8331	20.5435	18.8237
23.8053	26.0724	23.6577	24.3168	20.995	21.1953	24.725	25.7385	26.0819	26.5624	25.7325	24.7321	21.4504	22.6189	22.6607	27.5168	23.2561	22.7449	22.6781	23.4974	21.3407	24.0961	26.5852	22.9173	22.2801	22.5225	24.1866	24.1925	24.0535	22.3386	25.8409	26.184	25.9278	20.9308	23.2541	23.8391	22.146	24.9981	25.4236	24.7457	24.1438	26.0626	21.7044	23.6118	25.8134	21.3729	25.6327	23.9031	21.2573	22.8798
25.1288	19.2114	23.7587	18.4364	23.391	24.005	26.5082	24.7775	24.0941	21.0261	19.1856	19.8641	18.8671	24.8216	26.7685	22.4193	23.8414	20.3281	24.58	24.6054	19.7954	22.2587	18.7643	26.4531	23.8853	23.4364	22.0805	21.7158	20.0761	23.1139	21.3753	22.2683	23.6813	21.7615	20.0091	22.4626	21.1341	21.5261	20.3882	20.1893	23.2123	22.8384	20.8763	22.1833	20.4528	18.6068	19.4036	21.838	20.7116	18.0982
23.7445	18.1329	24.3598	18.1876	19.641	24.1232	25.3495	21.095	23.6321	20.1962	20.4152	20.4577	19.4867	20.7836	25.7927	22.8079	20.1729	18.8972	24.303	23.4671	18.476	24.4837	18.6663	24.5801	25.6077	22.3298	21.3471	23.6832	20.9348	18.956	20.5638	20.5842	25.6242	21.5549	23.3171	18.2637	21.0904	26.2208	24.437	23.4139	18.5382	22.6102	19.4625	20.0549	19.5876	23.886	20.9754	20.4865	20.5434	18.7557
20.9674	19.7467	18.7841	21.2627	20.372	18.6653	19.2381	20.8492	21.7865	21.0567	18.6501	23.2395	19.3472	21.7465	18.3927	21.4511	19.3387	18.9589	19.0358	19.7219	21.2772	17.5023	19.2273	19.5739	21.5343	20.2816	23.4728	22.1689	21.4386	18.407	20.5249	19.0508	21.8103	20.8483	20.0223	17.6802	20.1774	19.8066	20.7579	21.1086	19.92	21.9502	21.1131	20.5454	21.0075	20.4428	20.9045	22.8008	23.6451	19.3963
22.8193	23.6396	23.8825	24.2463	21.9299	18.2209	24.7793	24.287	24.1512	23.338	23.565	20.2719	18.3044	25.0314	22.7338	23.777	22.566	21.4897	21.697	22.4654	21.5849	21.6092	19.1594	22.9167	20.6136	22.7642	20.3195	25.255	20.1862	22.3153	25.5105	24.0144	23.4411	21.769	21.6617	22.8989	19.8749	22.656	24.4627	23.357	22.5923	24.1044	23.4351	23.7774	22.4457	23.1993	24.2028	19.5931	21.06	22.5532
19.0143	19.0822	21.2262	19.4845	18.6078	21.4358	18.6309	20.858	22.9491	18.7095	20.3297	21.2717	21.5448	22.9715	22.1083	21.4827	21.6398	18.5274	22.6587	21.113	24.2739	18.7989	22.0898	25.07	20.9739	23.1599	21.2974	22.0273	22.5805	22.415	18.8728	18.8285	18.5369	20.0245	21.7881	22.0429	23.3899	21.619	23.8511	22.699	22.9152	19.5109	22.748	21.8602	19.1001	18.8607	19.2391	20.047	20.4365	19.2234
24.6068	18.0983	22.6421	20.5418	24.1158	25.9125	27.1714	24.2334	23.0555	26.0039	19.3304	20.9239	20.0965	24.9162	27.8566	22.2929	24.303	22.8849	25.5682	26.7598	18.4114	20.5683	17.2739	26.9248	25.6404	23.1307	20.9988	20.0683	20.9284	19.3679	18.3031	21.5756	24.613	24.7473	22.5281	23.3104	19.6987	22.3736	22.5927	23.4472	22.9045	24.2927	21.7748	21.9287	20.2677	16.4992	19.4081	19.6458	20.0851	19.6168
21.5935	18.4753	20.7983	22.0701	20.8008	20.0822	19.9632	20.4376	23.8356	20.9286	20.8257	23.3888	17.5004	21.5658	18.1663	20.2341	20.9516	21.1984	22.667	21.6131	21.9869	19.6214	22.6937	22.2728	20.8928	22.193	23.5864	24.1946	21.719	17.8471	23.1086	22.732	19.3819	20.8936	23.0692	18.3782	23.2595	20.0638	22.6527	20.9131	22.8457	20.0397	20.7327	18.9943	19.7752	20.6767	20.7859	24.2522	23.8432	19.105
20.5597	18.4102	22.1814	22.4218	21.3678	21.6872	21.671	20.098	20.9729	23.2871	22.6582	20.3308	18.9019	20.8475	22.7535	23.4626	21.6693	22.7344	22.858	23.6012	22.2507	21.2512	17.0006	20.2792	20.2864	21.1731	20.7156	21.4667	20.5841	20.1511	18.6795	22.314	18.9496	21.046	19.3932	23.2579	21.8763	17.8233	21.4032	19.7869	18.5246	19.1687	20.0785	20.4704	22.0711	18.1077	19.5389	19.7084	20.9266	21.4111
22.7147	23.7288	23.4351	23.3525	19.7347	22.5056	24.7482	22.556	22.2826	23.6807	20.21	20.699	19.7242	20.3978	19.1446	26.6194	24.1386	21.7058	21.7146	19.6677	21.3475	24.8315	23.7455	21.8232	23.2608	21.9475	21.5861	21.681	22.2247	18.5168	24.2292	25.9786	26.2405	21.6578	18.8849	19.2854	20.6171	25.5115	24.6282	22.6987	23.5546	24.3558	21.1092	22.2564	24.6239	21.9097	25.5526	20.1707	20.5717	22.3372
25.1792	25.0189	25.0824	24.678	21.0395	24.6306	23.9759	19.7516	24.314	24.6524	24.2441	18.9649	25.5714	22.7107	24.0551	23.8761	25.4342	24.6188	24.2221	24.0343	25.3396	25.4691	26.2419	24.3463	23.5858	24.7664	24.0323	25.2691	25.4144	26.054	24.9356	25.4199	22.3964	26.6366	25.1537	24.8048	24.4226	25.012	25.5595	24.3605	23.7186	25.5845	24.9523	25.0273	25.2539	26.1365	26.5223	23.7548	25.3105	25.0413
21.94	19.6894	21.7856	22.4893	20.0734	19.4372	23.0176	25.8797	23.2188	22.6306	19.6477	24.4747	18.8915	26.6299	22.9714	24.3981	21.7332	19.6617	18.8566	19.3356	19.292	19.2097	22.4763	19.8895	25.7298	22.8108	25.8488	22.317	24.2851	19.3872	23.9146	21.929	23.4943	24.3536	18.9866	20.5293	25.2563	22.2564	24.8266	25.1604	21.7293	23.0011	20.4372	22.0351	18.5058	21.1176	21.6618	25.4459	23.2585	19.3645
22.3567	19.3529	20.1758	19.419	22.9892	22.6955	22.317	20.1659	22.0189	19.738	19.5873	20.6161	20.1818	22.1623	21.5234	19.4032	22.2639	19.8164	22.2261	20.2888	18.8415	19.2245	20.3785	22.0165	19.8188	20.6462	20.6969	20.1653	21.0215	22.1443	19.9967	19.987	20.3567	21.446	19.7924	19.0915	19.6819	17.155	20.0186	21.7615	22.831	20.192	21.2341	19.2835	19.1507	17.7088	19.8955	21.1551	19.6568	19.1048
23.3874	18.9608	23.0311	20.9152	21.0861	22.4522	23.6192	20.7043	23.2175	23.5028	21.6961	23.4328	21.9343	22.3725	23.0842	25.7694	22.3703	22.1527	22.5062	21.5933	20.3079	23.5782	18.4252	23.58	24.2314	21.399	23.8189	21.7151	21.9829	22.264	24.7314	18.8073	19.8899	21.7338	19.5401	19.6541	22.1949	22.9528	23.3981	24.8474	22.6956	25.2845	20.7105	24.1453	18.5806	17.4481	20.8919	23.0357	20.1216	19.9029
29.2303	23.4938	29.8379	28.7365	23.4132	31.0968	31.7827	25.6597	28.4433	30.3873	25.6379	24.2627	27.9613	26.2387	30.5876	29.1936	29.1431	29.2426	29.8829	31.0655	28.6254	27.8121	25.3176	30.3223	26.5234	30.4382	25.886	27.4746	25.4356	30.2771	29.1515	28.2308	28.8371	23.4788	28.5588	29.6019	25.8524	29.0441	29.5939	26.5525	28.8174	28.6056	23.7988	28.6024	25.9815	25.569	21.5863	23.7664	22.2611	23.6421
18.6901	22.4449	22.6447	21.4325	20.9928	19.3892	18.0037	20.5358	23.7042	24.5509	19.821	19.9963	21.2625	20.4589	19.9956	21.939	19.5958	21.2208	20.0339	21.3966	24.143	22.782	21.802	18.4668	22.3696	22.3326	20.9003	24.3522	21.5871	19.1147	18.3164	19.9285	19.4979	20.0271	20.8972	21.0637	20.5707	21.6036	22.0767	21.5407	22.8234	20.9753	23.0101	20.1008	24.3602	23.5807	24.6056	21.1107	21.3509	24.6069
21.276	19.8193	23.307	20.6344	20.4458	18.4352	17.3434	21.4426	22.3479	20.5655	20.4608	21.0614	23.4126	23.2136	24.645	20.2913	23.9808	18.7355	21.0436	19.2497	21.8729	18.5202	16.9746	23.02	20.6338	22.0301	20.8651	22.8697	21.0009	20.5806	21.5054	21.2652	17.8702	22.1894	19.6201	19.5275	22.9511	20.2386	18.5569	20.8586	19.1055	18.688	21.8327	19.5796	18.6695	19.2541	19.3227	20.0677	19.7107	18.9396
18.7239	23.6999	23.4505	19.5183	21.2642	18.7293	23.2942	20.5892	22.998	18.8252	20.0975	22.2671	23.769	21.372	21.9795	20.3269	22.7203	20.45	22.7316	20.4198	24.2476	17.9512	18.3532	24.3857	21.112	24.3237	21.0012	22.4842	21.2255	22.6813	23.3153	22.6804	18.954	20.5397	20.1199	23.6191	22.5829	20.837	23.153	21.1382	23.0804	18.8637	20.9561	18.9772	19.3264	17.4303	18.3375	20.1735	19.7748	18.3967
25.4549	24.3996	23.6229	18.8195	20.9272	22.8241	26.3243	20.9232	23.2879	26.9351	18.8554	19.5185	18.3296	19.8185	24.5637	27.0501	19.1905	23.3501	22.1183	23.4104	23.8418	17.371	26.0681	24.7352	19.9233	24.1773	21.3737	20.8229	21.1867	19.2011	18.3543	23.6107	26.7231	21.3655	20.0073	24.6551	21.6302	25.3411	24.752	19.9968	23.3609	25.0159	20.4042	19.5231	25.4649	27.1724	25.9131	21.0364	23.2155	21.0348
19.4703	23.1419	19.2728	22.2269	20.4283	20.3785	22.5853	20.848	19.9539	21.811	20.7419	20.3514	20.0921	22.7468	18.9632	23.8772	20.0334	19.021	20.3	19.7411	19.5182	21.6134	21.548	21.3148	20.6278	19.416	21.1622	22.252	23.0707	19.0109	21.2983	22.7776	18.9962	21.559	19.1661	20.8561	23.6231	17.5965	21.5771	20.5903	20.8361	22.2343	21.1495	20.0549	22.5424	18.1896	19.8896	20.2554	18.9872	20.774
22.5464	17.6203	22.0899	21.8026	20.6195	21.5823	20.7023	22.2208	20.2447	22.038	20.7767	20.8402	19.0435	23.9271	21.5814	19.4568	22.5003	21.5128	22.3029	22.0847	22.7777	20.6709	19.9968	21.5027	22.5176	21.6832	20.439	19.7269	21.337	19.7409	21.3135	21.0144	20.4153	22.2511	21.298	22.1896	21.4314	17.1706	21.5652	20.2118	21.1605	21.8407	21.8643	19.9113	21.8135	20.099	18.7015	18.9221	20.2482	19.6968
23.3284	17.7062	22.6109	22.8158	22.3742	19.2297	23.4831	22.1663	23.9691	23.2312	23.7208	22.0206	19.9665	21.2072	20.3417	24.9588	21.7315	22.4723	21.5178	22.0109	23.1137	22.4607	22.4956	22.5716	23.8465	19.5009	22.6926	22.9732	23.8661	18.7107	23.2802	23.9855	24.0137	24.0846	22.322	22.0545	20.1461	22.2794	25.2958	23.6551	19.9958	24.6273	21.0078	22.3814	23.477	19.3828	20.0778	23.8522	21.9944	22.2367
22.3141	17.9953	21.3826	21.9999	22.3077	19.1716	22.7585	20.2859	23.0285	18.2388	18.9351	20.3453	19.0099	20.9374	21.3261	21.3554	21.8749	18.571	19.6785	18.0302	20.9174	18.967	19.6884	21.8845	21.3781	21.2268	20.4854	21.9711	21.5147	20.2723	19.8713	23.0582	21.9161	21.7682	18.5176	18.5804	24.1496	19.9972	22.9141	22.8715	19.8936	22.2454	21.8783	20.2379	21.3735	22.301	21.0429	24.0518	25.3888	17.735
22.5085	17.8372	21.641	18.9145	20.5864	20.0039	21.2968	21.2518	22.0359	18.6262	19.2029	21.1121	20.7453	20.9471	21.3023	18.4235	20.7836	19.9811	18.9228	17.7908	21.2863	18.6847	18.4624	22.6656	20.301	20.4861	20.6413	20.0165	20.7161	22.3216	21.2312	19.393	21.0069	21.5457	19.6481	20.2079	20.2134	20.0836	22.1887	22.2495	20.4456	19.4117	20.6874	19.813	20.7253	17.3055	19.2892	21.1028	21.211	18.4531
25.1259	24.3046	25.8919	24.7348	23.1879	25.2349	23.2245	24.247	27.0457	25.4079	24.3395	21.9746	26.4992	24.1129	25.1518	21.6833	25.6522	23.4622	25.7228	24.2175	26.4401	21.9975	24.1688	26.3854	23.175	24.9204	23.07	24.3758	21.7568	27.1061	23.7145	24.9492	27.4126	23.0686	21.1899	24.4985	25.4334	25.361	25.4192	20.4639	24.8134	25.218	22.2541	25.4033	22.6421	19.2823	20.9791	25.1124	24.0875	17.8183
22.4595	18.7543	22.1201	20.3332	20.7143	20.7578	22.3943	19.8525	21.3637	20.8556	19.0565	23.2515	19.3764	20.4855	20.592	22.8644	21.3129	19.5069	18.4875	20.7495	20.9028	20.2038	19.3898	21.7736	23.4079	22.3947	20.5561	22.3703	20.7673	18.0102	21.1476	19.4778	23.2661	24.2736	20.3114	20.817	21.2181	23.5856	22.5968	21.3173	23.1756	23.916	20.9284	21.45	20.6622	19.798	19.6591	24.8118	24.1572	17.9173
19.2881	19.3003	20.4473	17.9194	21.0645	21.0035	22.4624	20.6079	19.7224	18.2525	19.9062	20.0113	19.3131	20.1127	24.151	17.7941	23.399	20.6237	22.9355	19.0386	17.7167	22.434	17.6947	22.0378	21.3259	20.3599	21.0508	19.7371	20.9395	21.9542	18.9862	20.7453	19.9021	21.9085	18.6626	20.2485	19.5087	20.9051	18.6211	19.7744	20.5664	20.6382	23.208	20.0285	19.1801	17.6928	18.8281	20.12	20.1428	18.6488
24.9067	16.0622	23.0612	22.9183	21.6177	26.1557	25.4795	21.0512	23.1983	24.4458	23.9548	21.0588	19.5583	22.5568	26.9304	23.7171	24.4664	24.6921	25.2502	25.9729	22.0431	23.7042	19.8357	25.3694	20.7162	23.8887	21.3453	20.977	25.017	21.9722	21.2303	21.7818	22.8124	24.7212	23.9723	25.4299	22.9013	22.5353	22.5244	20.1708	19.5158	21.9309	20.4463	19.8129	23.553	18.7874	19.9503	19.503	20.2511	21.1535
25.7422	20.1647	23.447	19.2396	22.9765	24.3849	25.4076	19.9494	24.4375	22.458	20.4121	20.4356	20.2297	19.7325	26.4858	21.9121	24.1514	20.2181	23.5124	24.7699	18.8461	20.0507	21.1383	25.3271	21.2874	23.2506	19.5986	24.3913	20.8454	21.1593	21.6142	20.8309	23.2819	22.8862	19.6398	20.9194	19.6439	18.9943	23.6665	20.3607	24.3987	22.453	21.8924	20.4755	19.3304	18.0893	21.0267	20.4751	21.1349	20.2063
20.8377	17.0347	18.3229	22.3164	23.5224	20.0316	22.255	22.822	22.1697	23.0756	23.0882	23.5072	19.8485	22.1007	20.4248	24.1766	19.9826	19.4505	18.5304	20.1701	18.8901	22.7147	23.1322	19.576	21.6286	20.0683	21.8116	23.1166	23.7424	19.2314	23.0685	21.442	22.9108	21.1499	21.4549	17.8502	20.4437	19.4022	22.6526	22.391	22.4373	23.8916	21.8477	21.7943	24.3097	22.534	23.0162	19.7309	22.5623	22.8031
23.7374	18.6015	23.9558	23.9129	21.8545	26.5618	25.1848	21.7607	25.1166	23.5784	17.4118	23.5055	26.89	20.1873	24.1185	18.2099	26.7847	23.9129	27.9261	23.7875	27.2603	22.5132	24.2964	25.5156	23.1779	22.5413	20.1232	24.5886	21.3917	28.5853	24.3527	23.4289	24.6209	20.9719	21.1207	22.0348	21.0368	22.6171	24.8683	23.9308	27.2975	24.8283	24.7561	24.8857	20.5566	23.3897	19.5632	19.8413	20.335	20.136
22.2144	20.4733	22.0138	20.0772	21.9422	21.9185	20.8453	23.7616	23.817	23.5679	21.213	21.3681	22.1424	20.7784	22.7581	17.8088	22.1914	20.7069	22.6214	22.2903	22.4332	18.7742	17.7991	22.2713	21.2529	19.5283	20.9684	23.0654	21.7152	23.7288	22.7843	18.5888	24.7122	21.4163	20.6806	19.123	20.7399	17.9562	22.8547	23.139	22.9856	23.0007	21.2005	23.3019	19.4468	17.2826	19.7369	22.3164	18.9695	18.4858
22.0472	18.9686	21.4299	22.4837	20.8657	20.2852	20.6399	23.1256	19.7258	21.3501	18.3129	20.9842	23.1485	22.8084	20.9711	17.8506	22.5695	22.2893	22.4352	21.5751	22.2062	19.3336	19.3575	22.1203	20.6966	21.3378	21.1664	19.7662	21.717	19.9479	22.1822	19.7683	20.1972	24.3903	19.1865	21.0062	23.0097	17.2586	21.6779	20.5569	22.9986	23.4736	23.0231	19.6757	17.5522	18.0137	21.0478	20.5929	20.5638	18.6532
25.2786	24.2684	23.7126	25.2955	20.1858	23.0361	21.5847	25.4774	24.7221	24.8478	25.6027	20.4156	22.5347	20.5933	22.8114	24.4925	23.9203	21.4118	22.807	22.4854	22.1846	22.5106	26.3162	20.6914	22.7021	23.2694	20.7278	25.2499	19.7879	18.1668	22.6232	25.5569	25.1632	21.5471	22.9692	21.8758	20.7505	24.5633	25.2096	22.7072	24.4085	24.5299	20.917	25.3748	20.6565	24.7414	23.6763	20.0991	24.9875	24.0767
28.4412	25.4105	28.2516	28.9466	23.6715	28.2951	27.3544	23.4031	28.975	28.3879	27.8829	22.5796	29.1354	25.3705	27.4451	27.7234	28.7116	28.5359	28.5277	27.6612	29.3186	27.8542	26.8702	28.9912	28.3822	28.1197	26.7081	28.0252	25.8135	28.2198	27.813	27.3652	28.5614	22.868	26.7038	28.6752	26.1171	27.3905	28.5597	26.9767	28.469	27.0792	26.1746	28.9804	27.9201	27.7287	22.6594	22.6733	27.7002	25.9029
18.7571	18.1556	20.2551	19.6579	22.1451	20.9676	22.3917	21.8488	22.4374	18.2915	19.7646	20.6335	18.545	23.905	18.9672	18.9356	19.0751	21.024	21.2837	20.3813	22.3838	21.4709	16.706	21.4118	24.2723	17.9523	22.024	21.3731	22.2319	21.6444	21.8522	20.5165	21.2601	22.1043	20.6082	19.8698	20.671	19.994	21.3749	21.1228	21.0963	21.0539	22.0513	19.2251	19.7642	18.7258	20.2676	21.959	21.2029	20.0185
25.0786	23.489	23.6771	25.5372	21.0717	23.7361	24.934	20.6024	25.3727	25.74	26.6715	20.5958	22.9581	21.5888	22.1776	24.8326	22.8661	25.9344	24.0835	25.3571	23.2542	23.7295	26.0581	20.7929	23.1818	22.7923	23.5889	23.4145	24.5038	22.5576	25.9073	25.2891	24.4911	22.6474	24.5368	25.092	24.468	24.3765	25.8954	22.8487	23.5346	25.4601	21.0407	25.7603	24.7472	23.9375	24.2467	22.8683	25.4786	24.5553
24.1375	22.2205	24.9729	24.836	24.6333	23.7498	24.1591	24.2739	25.3968	24.8137	22.0975	23.9619	23.5655	25.5989	24.1516	22.4053	24.6354	23.9123	24.797	23.5408	24.4971	21.9357	22.7241	26.0217	21.0963	24.8615	21.3805	24.7251	23.1177	24.133	26.0704	25.0147	22.6018	22.2696	22.6747	23.7539	24.7077	24.1646	26.3339	24.5232	25.3683	24.7479	25.15	23.7259	20.651	21.6572	19.2545	21.1575	21.2743	18.7828
19.1707	19.3655	20.7164	18.9558	20.376	21.8407	21.3538	20.2995	23.6593	20.0804	20.1047	23.2489	18.6286	21.0186	20.9414	19.5264	19.6718	18.4428	18.6974	17.768	19.8342	18.266	18.1562	22.25	20.8729	18.4813	20.7478	20.2526	20.3673	20.3466	20.096	20.142	21.6435	20.989	21.028	18.0134	22.1607	17.802	19.8746	20.4527	19.9552	20.0828	21.2738	20.3044	19.2544	18.5336	18.8914	20.3307	19.5645	19.1362
23.9114	18.9434	20.9476	21.1041	23.1928	21.667	24.1408	24.9536	23.7935	24.7324	24.5964	21.1406	18.9096	26.5448	19.0302	23.9942	19.5914	21.3015	18.9855	20.7924	23.0519	20.8822	23.9322	22.1988	21.0155	20.3725	23.2747	22.75	25.0861	18.7327	24.0232	25.3555	25.4705	21.7381	22.4882	22.2823	24.2349	24.4191	24.5386	24.3149	20.2333	25.6397	23.5889	22.5484	23.714	25.4555	25.0378	24.5995	25.3825	23.8182
22.0092	18.1926	22.3004	21.8732	20.2959	23.274	21.7949	21.2495	18.64	22.6155	19.3514	20.914	18.756	20.9361	22.7673	21.738	22.6157	23.5653	23.2381	23.9874	21.7198	20.5829	19.0762	22.3486	24.246	22.0848	20.5655	19.7949	21.3007	20.2685	18.8547	20.1554	21.4223	21.1361	22.2123	21.0595	19.8324	17.5531	20.9163	20.6898	23.2816	20.2904	23.4705	21.6597	18.3777	18.971	21.069	19.8103	20.56	20.1235
18.9812	17.8547	18.5116	18.3765	20.7609	18.8161	20.0177	20.6843	22.1923	19.8528	20.4725	21.6062	19.6476	20.319	18.5894	21.7233	20.0514	19.6132	18.5315	18.9755	17.8487	19.8842	20.4162	18.1872	21.8881	19.0017	24.0815	20.7204	21.5194	19.3548	21.2995	20.5779	21.4491	21.6784	20.5069	19.1136	19.4141	21.2069	19.2437	22.3819	20.0184	20.0509	21.1796	19.8491	19.7589	18.402	21.0016	20.5131	22.465	20.6546
21.7359	18.6979	22.0334	23.3705	23.4149	22.1138	21.7782	21.53	19.1745	22.6036	24.7808	20.1394	20.1785	21.3794	21.9123	21.4994	19.9958	21.5406	22.2941	23.1787	22.0654	19.923	18.6157	20.4135	23.609	19.0426	21.0203	20.1514	25.0981	20.722	23.6862	23.4808	21.6989	21.0691	22.9559	23.4469	19.9145	18.6285	21.6799	23.0318	18.4291	21.7439	21.052	21.0186	22.3518	18.6905	23.2684	21.1873	24.2242	21.1782
20.5275	18.946	21.3281	20.488	22.1913	20.9921	18.7759	22.8283	21.3584	22.5531	20.0814	21.1488	17.0302	23.6174	18.6328	20.2734	18.4496	19.1053	20.359	21.7063	21.2522	22.5296	18.6322	19.9366	21.4059	19.9197	21.1542	19.9881	20.948	20.159	18.6425	19.5148	20.0209	20.8542	20.526	20.629	20.5649	18.4291	21.5806	22.7687	22.1961	21.8519	20.1543	21.4463	18.7016	18.4018	20.0272	23.0585	19.7979	18.5686
19.7999	16.6727	23.6055	25.09	21.9977	24.1504	22.7802	22.1141	23.9205	18.9418	19.3857	20.1891	21.019	19.8432	24.0276	18.5486	24.1272	23.7491	24.4025	20.4151	24.0899	17.54	17.8445	21.2324	21.1843	22.2327	19.9279	20.6937	21.035	24.3421	19.5594	18.9972	17.9969	20.4402	19.7352	25.6423	22.852	22.6189	23.6953	20.3813	23.1489	19.5221	23.6764	24.4208	18.8584	19.2891	19.6002	20.2706	19.9109	17.5924
25.2699	26.3349	24.3293	23.9143	21.0378	22.7182	25.1652	21.1818	23.6401	23.9896	24.594	22.7914	17.9757	20.6725	23.4078	25.2342	24.0737	23.0095	22.3407	23.1139	22.1336	23.9977	24.9678	22.7033	20.4263	23.297	20.583	23.0094	23.521	19.3255	24.7095	25.455	26.2072	20.5585	20.0309	21.8003	20.3613	24.2366	24.7483	23.1883	21.5915	24.6488	21.7556	25.4749	24.7859	24.0007	25.9849	21.0872	23.3498	24.682
24.3844	17.8872	22.1743	23.9961	19.3957	22.2133	21.9009	20.6662	22.2344	18.3298	24.8624	24.9311	19.4991	21.1591	23.456	24.9781	23.4095	22.1829	22.7147	20.145	23.3617	21.9774	23.0973	23.3206	21.414	22.2539	21.3497	22.0181	24.5665	20.9702	24.422	23.3382	23.6904	20.688	19.9798	23.7847	21.4567	22.0258	19.2737	22.7068	19.9415	23.0151	21.0577	24.266	24.3703	18.2181	19.7864	20.3794	23.7403	23.7872
21.8829	19.3084	19.38	20.6915	21.4762	22.321	22.2539	20.8637	19.2942	23.0951	19.0727	20.7838	19.856	19.9496	21.9351	20.5667	18.2255	22.2128	19.6964	23.8394	17.1797	18.8055	17.2081	22.5309	24.8334	22.2863	20.7336	22.722	23.1668	19.6448	19.3893	18.4694	22.5096	22.2509	22.4397	20.2854	20.4259	20.9235	19.0316	20.5378	20.5722	22.3881	20.1854	18.6757	19.9264	17.6146	19.2604	21.2005	20.6807	19.1303
23.8814	23.7889	24.7942	25.0349	22.32	21.6623	26.4084	22.4293	23.046	26.9998	26.0719	20.3561	22.2332	24.8855	22.7217	28.1068	20.9954	24.1377	22.9805	22.233	23.912	24.0729	16.5592	25.4404	23.8109	24.9144	22.5197	21.9234	24.3099	23.2834	25.9146	19.1007	27.0224	24.4624	23.3206	25.4904	24.8193	25.6536	27.3265	25.7317	23.6474	27.032	22.649	24.2349	27.1922	19.0599	26.5128	24.2576	24.5566	21.9807
22.9226	18.1663	21.8846	17.7857	24.1445	22.7223	23.8479	20.8296	24.413	22.8067	19.8539	19.7938	19.9356	21.5683	22.2583	22.1143	22.3949	22.1668	20.1255	20.6473	22.6856	19.548	22.311	23.8262	20.4749	22.7968	21.2886	24.0182	21.7558	24.3916	20.7592	23.121	23.8293	21.7667	20.1776	22.5057	23.401	21.6109	23.6606	23.768	22.1599	19.1421	21.5314	22.4349	19.2247	22.9056	20.1375	20.0773	24.5439	17.953
23.1519	19.1952	23.0632	20.3966	19.8889	22.5692	22.7437	20.9618	22.1307	23.1382	20.0838	20.2648	19.7072	20.6664	23.024	21.8556	23.4086	19.5813	22.6003	20.7814	21.7681	17.7023	19.6589	22.4927	20.6383	22.7689	20.665	24.167	21.5044	23.0798	23.9239	20.927	21.3745	21.1768	20.7191	20.3458	20.8292	22.1717	23.4904	22.7889	22.9007	22.7063	20.4931	22.2195	20.7286	18.4503	19.9956	23.1698	20.1749	18.1276
22.1102	18.0392	22.3378	18.4924	21.652	21.1598	21.8289	23.354	20.9079	20.553	17.9774	20.7947	19.0655	23.1245	22.1964	21.9354	22.6479	19.023	20.7531	21.8508	22.6448	18.7962	17.3354	22.1094	20.549	22.6537	20.445	22.0158	21.0571	21.3481	22.6169	19.9212	21.0752	21.4677	20.4117	18.6032	23.6478	19.4392	22.899	23.1017	22.0241	22.5963	21.4577	21.0842	19.5538	16.8789	19.8035	21.577	21.2588	19.3168
21.3987	17.6314	21.9089	19.4108	20.6835	18.7242	17.7796	22.5747	19.0232	20.6086	19.1027	22.6566	20.2419	23.6859	19.7483	17.8917	19.3936	19.016	19.4757	19.0711	17.6216	19.9613	22.3559	21.189	21.0675	18.0749	20.0213	21.4831	20.8558	19.5896	19.3931	19.6644	21.0937	20.99	19.3603	20.204	20.7384	20.0358	19.9042	20.3812	20.7316	22.805	20.185	19.2719	18.8143	17.6773	18.4517	22.7326	20.4121	20.9356
22.0396	16.8459	23.5721	19.1233	20.8696	21.4561	21.7387	22.9012	22.3082	19.8623	20.4196	22.6241	20.4184	23.4944	21.6333	22.1562	23.4008	21.7418	22.5142	22.1177	21.3944	18.2887	22.0541	22.8926	23.7185	20.987	24.6814	20.5628	21.8176	23.3261	21.4209	22.9716	19.9355	22.5721	20.7304	19.2516	23.5601	18.4335	22.5961	22.9009	23.2769	23.7205	21.197	22.259	19.813	20.9444	19.8121	20.3046	23.6003	21.6014
19.0757	17.0705	19.8991	20.6702	20.4573	18.4676	18.6287	19.4453	19.6654	18.8065	19.6249	21.6103	19.8315	23.7587	20.6663	18.4034	18.2041	21.5391	20.5078	22.512	17.1953	18.2475	18.3443	19.1893	21.0413	17.4534	20.1425	21.6171	21.3581	19.8033	19.4522	21.0463	17.3549	20.4924	19.4277	20.6766	20.0594	18.5028	18.6661	20.8623	19.3625	19.4992	21.7791	18.7448	20.7709	16.9715	18.4986	19.5571	19.8791	18.5354
24.8337	20.3905	24.537	23.482	24.3666	22.8423	25.928	23.4168	24.7533	25.7128	25.661	21.1102	24.0206	21.4299	24.8667	27.0191	23.4173	24.9069	23.7626	25.0181	23.7762	26.3365	25.3588	24.5532	24.9962	24.4491	23.6135	25.1598	25.8858	23.6685	25.177	23.8037	26.3647	23.662	23.1843	22.5129	19.536	25.1861	25.8109	25.1992	23.3569	25.329	20.9406	26.5253	26.867	25.785	24.5816	23.9476	23.6108	25.1976
22.9437	20.2814	22.9536	22.247	21.0709	22.6134	24.1651	21.3236	23.5169	21.3013	20.3147	20.5073	18.773	20.3339	22.1654	22.2505	22.475	20.0635	24.0243	20.4141	22.4777	20.8395	18.0285	26.2079	19.5454	23.0276	20.9706	24.2366	20.1516	22.983	24.9655	23.2641	20.9791	22.775	22.5085	20.0899	20.4485	18.9773	23.8851	23.2732	23.5278	22.848	21.1473	22.3143	19.4685	17.0816	18.9619	19.8499	21.5948	20.21
24.5065	27.4196	28.1354	30.3831	19.5242	28.6961	28.4922	22.0687	28.4496	29.7869	25.8688	24.0079	26.7228	21.3505	28.5411	26.4116	28.1422	26.098	29.3481	28.1279	27.161	26.2235	28.4775	29.9385	22.8773	27.9541	20.8209	23.7869	20.8751	28.3365	26.056	25.7975	28.907	26.3415	27.7431	28.9021	26.6308	28.555	27.5402	23.7525	27.6697	25.0238	27.8501	24.8639	27.3598	26.662	25.3606	21.626	22.9899	24.9299
22.6453	20.0834	22.5016	24.5216	21.2563	21.3583	25.0182	21.1182	24.1982	24.7699	24.8985	23.9555	22.7858	21.8773	18.802	25.387	24.0248	24.1522	19.4188	23.5685	23.1218	23.1218	22.0674	23.8528	21.8649	22.83	21.8745	24.5248	26.2491	20.3883	24.5345	20.5827	25.6371	24.041	24.1313	24.085	20.9839	25.7849	24.3975	24.6326	23.0965	25.2751	21.2485	24.8733	25.428	24.8755	24.674	21.2138	24.7488	22.126
21.7536	23.136	23.3527	21.9189	24.0617	23.6721	21.9652	20.4156	24.679	24.1446	19.2436	22.681	19.5928	22.1267	26.1205	23.9274	26.4104	24.4987	24.3364	25.6976	23.8274	23.9955	21.9444	25.8002	23.058	25.0708	20.7752	25.3825	21.751	20.9136	19.0391	20.2547	24.5473	21.9135	22.5044	23.6421	23.882	19.7846	22.7586	22.4532	25.7727	23.8998	22.482	19.4343	21.4676	17.8948	20.4145	24.7548	21.2893	18.9019
19.6481	18.2434	22.2123	19.7841	22.7674	21.0428	22.0198	21.3311	21.796	18.5881	18.8657	19.2391	19.8341	22.1484	22.3824	18.169	21.5049	22.1992	22.1407	18.3988	20.8178	18.9334	19.7276	19.8125	22.9888	22.1026	21.0729	20.6112	21.7218	20.6952	19.0797	20.1402	17.779	21.4709	19.5305	19.2211	22.7244	18.0659	21.4326	20.2816	23.1612	18.7528	20.9208	20.5376	19.623	19.6264	18.4979	21.1716	20.3506	18.0785
24.0964	18.7954	24.8883	20.9254	23.2874	25.6071	26.3724	20.4607	24.3388	24.8595	18.1379	22.8351	17.6237	23.8446	26.03	22.0943	24.0654	24.5421	25.6895	26.1955	23.7512	22.6651	18.1286	26.3967	23.2537	24.5843	20.5841	23.5241	21.0414	23.5878	21.2713	19.2836	23.7397	23.8593	22.2086	23.9354	22.8896	23.172	23.7897	23.4094	25.3313	22.756	21.3888	19.1492	20.7897	19.5483	20.0219	20.5612	20.462	19.1905
24.4149	22.0188	23.5693	19.6559	22.6057	24.4951	24.6986	20.6121	25.2481	25.6502	22.5463	21.6097	20.6313	21.3387	23.2765	24.4902	22.3006	23.1169	23.3601	24.4964	22.274	22.817	23.6208	23.405	20.0952	23.4368	20.9913	23.1277	26.1869	22.1199	24.8875	24.8362	23.9544	21.5857	22.8394	22.8943	24.2192	22.9402	23.8366	26.0205	23.5081	23.5886	21.9333	22.8118	24.8488	23.6134	23.0441	20.2938	23.595	22.7839
20.8712	17.8891	17.6567	18.6971	20.8568	19.2503	17.4027	24.165	23.3903	19.5318	18.346	22.2054	18.8045	24.213	18.81	23.2001	20.6824	19.4651	18.4021	18.4902	17.2397	20.3502	18.7543	20.828	23.0975	17.864	25.0537	22.8123	21.6544	20.0562	20.1252	20.7556	21.0708	21.2694	20.2497	19.554	19.653	20.5475	21.4088	24.0103	18.7254	22.4607	20.5148	20.7274	19.1937	20.1881	20.8983	23.8715	21.3029	20.2571
22.7035	20.8907	20.3735	20.3448	20.4761	21.1385	21.5599	23.015	21.4609	21.3237	18.5735	22.0869	20.1865	22.9393	22.6478	19.1818	21.9836	17.7482	22.3471	21.6218	20.0955	20.4972	18.6135	22.9144	22.9388	17.4678	22.2032	20.2933	20.9657	22.8691	19.2383	18.6232	20.4449	21.6912	20.6779	19.4964	22.2594	19.2922	20.3162	19.9544	23.0142	20.9695	20.6137	20.6691	19.5167	17.7136	19.2042	20.4105	20.1526	18.8069
20.2874	21.3399	21.1316	17.9578	20.3047	19.1867	19.9141	21.6858	19.6233	19.3568	21.3212	19.801	19.0759	21.3769	19.0937	18.994	20.4295	17.4994	19.0706	19.8552	19.021	19.7669	17.5602	20.0338	20.9811	17.5092	20.0748	20.9923	20.7227	18.9204	21.8727	19.7744	18.7054	21.2772	18.1383	19.7192	20.4417	18.2519	19.7379	20.738	19.5629	19.2076	20.8626	19.299	18.8706	17.8997	19.6357	21.7676	20.3854	18.979
21.0046	16.945	22.8232	19.2464	20.7323	22.4041	20.8267	20.5293	22.5683	20.7666	19.4328	20.7064	21.6998	20.7564	18.6339	20.2271	22.809	20.5751	18.9805	20.7608	21.683	21.4252	19.3702	22.1493	21.1887	23.0092	20.6323	23.1357	20.2548	21.6859	20.6924	21.0324	20.7613	23.5924	21.3559	22.949	25.0906	20.709	19.3549	20.4075	22.0567	21.1702	21.1099	23.2507	20.8086	19.4176	19.947	20.081	19.9197	20.2781
19.6514	17.9785	18.5569	20.0025	20.8582	17.4183	20.8593	21.0099	19.2037	19.3607	19.9443	20.9185	20.0763	21.6848	19.5901	21.8724	19.4241	18.7965	19.4959	17.5327	17.9817	18.9031	19.537	18.7368	20.729	19.1642	21.5293	20.3245	20.3886	20.4004	19.5117	20.4498	21.3828	21.1354	18.901	20.3289	21.6447	18.5725	19.7689	22.0134	19.0288	19.567	19.8139	19.438	20.7486	18.0438	20.0994	24.1272	22.0029	18.501
21.6402	19.6413	20.1065	18.1231	21.6651	19.933	19.6413	21.2961	22.334	19.4215	19.1045	20.4487	18.9524	21.3025	20.925	20.5072	20.8354	17.4757	21.2507	21.2438	17.2834	19.234	16.7482	18.7531	21.4131	20.0237	21.0762	21.1292	20.5349	18.9933	19.0808	18.7708	17.3699	20.6406	20.1299	19.9827	21.2818	18.0671	18.1034	19.5555	21.4799	19.8774	20.7035	20.5714	19.8814	15.6984	19.606	20.6303	21.3165	18.8606
23.7556	18.8015	21.7043	21.6187	19.7053	25.819	26.3497	22.0934	21.126	24.6378	22.1376	21.7042	18.5558	20.7365	25.956	23.5975	22.5299	23.0685	24.8348	25.0056	23.169	21.3576	18.1637	27.1218	21.1744	23.2786	21.1938	23.5386	23.1963	19.2381	21.8219	22.9098	24.9799	21.0254	20.4178	23.1738	22.0665	22.3241	22.4669	19.9884	19.9678	21.7075	24.0104	22.6225	23.4812	18.4367	21.1306	20.5415	21.2733	18.1412
19.7042	19.0194	22.475	19.2369	20.3212	17.162	23.6882	23.6024	22.3403	18.9963	21.8858	21.1479	17.7921	20.9533	19.5325	22.9033	23.3015	21.693	21.8604	22.2259	17.8274	23.4187	21.409	22.9509	20.7499	22.3623	20.87	20.4466	22.3015	19.1043	19.9769	22.6148	23.4861	20.8838	21.6872	22.9114	20.0758	23.1296	22.5237	21.391	18.4116	19.8839	21.6665	19.5456	22.0444	19.5344	18.9945	20.4211	20.6482	20.2991
23.0002	20.8179	23.6845	24.8382	23.9983	23.5126	25.8018	24.2319	24.4937	25.6337	23.1124	22.9652	18.0105	24.706	23.5775	23.8715	23.4142	23.8091	22.3122	24.0455	23.3523	23.0494	20.0355	24.6115	23.4377	22.3658	23.8698	25.2599	23.7302	20.8521	26.0173	22.8238	25.3089	24.9803	22.437	22.178	22.6702	24.1155	23.8894	25.3878	23.7988	24.9382	24.2071	24.8275	22.6981	21.5818	19.1435	22.607	20.3744	21.7109
22.005	18.4191	21.485	21.1713	21.042	20.33	21.489	24.3153	23.5074	21.2401	18.2297	20.904	18.2492	22.6288	18.503	19.5212	21.0579	20.7144	19.4335	19.711	17.5782	19.1768	19.386	20.568	20.5589	18.1986	20.878	23.0483	21.0874	19.8812	22.5228	19.7659	20.8704	20.6818	19.7801	18.7989	21.8972	20.1911	22.235	19.6057	18.9709	21.2469	20.6958	23.5098	19.5014	17.8057	19.5183	21.6946	20.4938	20.2323
22.0512	22.4401	18.3099	21.5131	20.4627	18.498	21.5556	24.2733	23.1064	21.1602	21.3463	23.4048	21.1325	23.7135	19.1798	25.1289	18.7946	18.731	17.7014	18.803	18.6548	22.7614	22.3057	18.6733	21.0356	21.8508	22.5279	20.657	25.8136	20.3437	22.9435	21.5428	24.7568	20.7397	20.729	20.3415	23.2411	22.006	24.1725	22.9371	19.5158	24.1197	20.4711	23.9892	25.4161	23.8608	24.4061	19.5745	22.1497	23.0384
22.1724	18.4341	20.7026	20.4233	20.9845	20.6378	20.924	22.7429	19.3753	20.4438	19.1873	20.4701	19.151	24.2262	21.2391	20.2809	18.8802	20.2275	20.772	20.7378	18.4551	19.3983	18.9942	20.0996	21.1759	20.926	20.7329	21.2177	21.4162	17.6005	21.2099	20.8257	17.4126	21.6516	20.398	18.8748	21.2234	19.1182	20.5172	22.5693	19.3687	19.6058	21.2866	17.7942	19.6671	16.7203	19.8908	20.4265	20.1564	19.2667
19.3353	18.165	21.0273	18.7202	20.3983	21.5042	22.6714	22.5185	22.186	19.0381	20.7281	20.2749	19.6876	20.9159	22.4889	21.2241	21.0306	19.9467	21.4226	22.0373	20.0636	20.0045	16.9297	22.4996	19.8905	19.9491	20.2264	20.3254	20.8763	20.5321	20.7032	19.3043	21.3779	21.1606	19.8091	19.1301	20.5407	19.0549	18.7214	19.6654	20.1393	21.6579	20.1578	19.839	19.199	18.4302	17.9391	19.6039	20.719	18.8436
21.6055	17.2261	22.5321	22.3401	20.1915	19.834	20.1452	19.5991	24.7645	21.2319	22.4269	22.6619	25.5032	22.0488	22.1222	21.9003	22.2769	23.7554	20.5634	19.6088	25.3132	21.1271	18.1532	21.5657	20.5772	22.5144	23.4925	24.1353	23.6591	23.1489	24.0427	20.752	19.1219	21.3775	22.1677	18.9905	24.3361	21.8333	24.9606	22.9078	20.4893	22.2416	20.4825	22.4811	19.9796	17.1213	21.3963	20.8733	23.9039	19.0281
21.2753	17.9562	22.6154	20.3408	19.7931	21.9658	20.7705	21.8747	22.6117	21.5588	19.9499	23.2489	20.6351	21.061	23.2667	22.1795	22.5925	22.3611	22.6518	22.3775	22.0396	21.5471	21.9111	21.6298	21.3808	22.44	23.5851	22.66	22.6645	23.7166	22.6848	22.2617	21.8094	21.5558	19.5442	19.8003	23.7371	17.9232	22.6361	23.409	22.3091	22.0731	21.3456	20.6587	19.8533	17.3154	22.2033	19.8941	23.2898	20.7766
23.1471	24.3752	21.803	21.4666	22.3875	22.3713	23.5459	21.7491	23.4538	23.7565	20.1518	23.7562	18.8064	21.4582	22.4367	25.6198	23.2627	21.5753	17.4503	21.6748	21.6007	19.6603	22.4437	22.5852	22.7743	21.9887	24.0183	22.141	25.2121	22.6864	22.6404	24.6916	23.7666	20.7827	20.2054	19.9346	23.2692	23.6047	23.3854	22.6069	23.2054	23.618	21.3865	22.831	21.9577	23.1304	25.5001	23.6644	20.628	20.8197
19.3716	17.6875	22.1218	19.3766	22.8828	20.6181	21.3842	20.1087	21.8986	20.1141	23.1345	21.853	21.725	21.2327	21.5025	22.7411	20.1582	18.8303	20.4031	20.242	20.4709	21.1039	19.4564	21.0556	23.1902	22.0248	24.278	22.1128	22.8527	22.2664	20.9417	19.8907	20.6864	20.4276	20.4	20.2824	21.5623	18.6673	22.0385	23.2712	21.9412	22.1527	21.7675	19.3677	23.3618	18.6375	19.2788	22.7183	24.084	21.6201
22.1031	20.8733	20.6347	20.8193	21.5756	21.5148	22.6863	22.5616	22.0476	21.0244	19.5956	20.7621	17.8885	21.8503	22.3376	23.1136	22.5844	18.1314	20.9175	20.4716	21.3599	18.4833	19.9424	22.3484	23.4577	22.1476	23.8133	22.4817	20.3138	21.8159	22.6018	21.1795	22.0963	20.645	20.8766	17.4231	22.7648	20.5766	22.7132	24.688	22.8714	23.0944	22.6282	21.2928	20.8407	17.7688	20.7289	21.3848	21.7781	18.5069
21.4719	21.6315	23.0414	20.2253	19.907	17.1376	25.6868	24.6517	23.9465	19.2013	19.6095	24.1442	22.9317	24.3026	19.0886	24.0448	21.9829	18.2264	20.5535	22.0923	18.4596	23.1419	17.5856	22.9632	20.735	21.4216	20.6203	23.1503	20.9295	21.0761	25.1528	23.662	24.5018	20.782	18.6171	21.0458	21.1416	22.6797	23.1177	20.1063	19.7034	24.5393	20.609	24.6578	22.8171	19.6305	22.4677	23.382	20.5047	19.376
20.3051	17.3044	19.195	19.3457	20.0316	18.4305	19.1607	22.887	20.6381	19.4827	19.3602	20.9055	18.8933	20.4614	19.6105	18.9982	17.9838	19.6454	18.759	19.2055	18.529	19.9483	19.3658	19.539	21.3168	17.5498	20.4753	21.015	21.9202	18.4244	19.9229	20.6488	18.1246	21.4367	20.1279	18.2819	20.5188	18.567	23.2401	21.0452	19.268	23.002	19.9447	18.5573	19.6823	18.1762	24.5454	20.8038	19.6377	19.2354
22.983	22.7625	19.9408	19.6827	21.5354	19.9605	18.135	23.4613	22.7043	22.1699	21.566	19.5918	20.5101	21.4665	19.5474	22.0851	20.944	22.2425	21.5218	19.2199	23.3453	20.017	21.9629	24.2029	20.6632	22.9185	20.2686	24.4189	21.4198	19.7518	23.8506	19.8631	17.4545	21.5837	21.928	19.6654	24.4237	22.7258	24.9466	23.4682	22.57	18.9833	23.6007	21.4149	21.2744	17.2608	19.2671	19.6035	22.236	19.045
21.9952	17.4142	21.5565	19.6245	23.8363	19.972	23.571	24.1303	23.3659	20.7824	18.4902	23.4494	19.6936	22.5254	22.7315	21.6204	21.4189	17.231	20.427	20.8881	21.6337	18.5588	19.8031	23.8812	22.9083	20.692	20.3279	24.0741	21.5496	20.0628	23.6614	20.1641	23.0692	21.1625	19.5696	19.9896	21.5021	22.0474	23.7858	22.9826	19.8565	23.7348	23.6637	21.6448	18.4792	18.4971	18.9288	20.5579	23.9938	17.7055
20.8356	19.1443	21.2282	19.85	21.6568	22.426	21.7416	20.9299	21.8227	19.0392	19.1667	20.2936	19.9054	20.5109	21.0912	19.0634	19.1731	18.5516	17.4264	22.0987	18.0438	18.8126	18.3067	22.4307	20.4326	20.8452	21.2612	22.4388	21.192	20.852	18.958	20.1121	21.2739	23.6094	20.6843	19.2716	20.7574	19.1407	19.8464	21.2757	19.4888	19.8197	19.9403	19.8341	20.2181	20.9209	20.1568	21.1069	20.5103	19.5478
22.1683	21.4948	23.0169	22.0322	23.2211	22.1514	24.2763	22.7868	23.2333	22.1388	18.9177	22.1589	19.3218	24.3508	24.22	23.5844	22.4775	22.5793	22.6254	22.5803	21.9718	18.6738	22.1759	23.7633	23.7251	22.8339	20.7586	23.304	21.2009	20.5555	23.2487	22.6261	24.4157	25.2471	19.7885	21.5639	22.9023	22.4693	24.2748	21.0028	23.537	23.3399	20.9301	18.8567	22.634	21.551	24.2789	20.0458	20.3594	19.0536
21.1448	18.2127	22.0981	20.4672	23.6636	19.6828	22.752	21.1222	22.7088	22.0842	18.5627	21.1149	19.3363	24.4965	22.4052	22.4014	22.6305	20.6504	21.2922	20.5453	20.2738	19.4789	19.8914	22.0875	21.8946	20.9567	20.9807	22.265	23.1643	19.374	19.5924	23.1247	21.5447	20.1111	20.5955	21.6146	23.1221	20.5939	22.4789	20.0081	21.7618	21.9548	21.6152	23.5191	19.69	19.6829	18.4569	20.3161	19.6678	17.752
22.1856	18.6244	21.1183	20.1167	20.5019	23.3598	23.8548	20.6962	18.5973	20.374	18.6645	20.4549	19.0747	20.6771	23.9845	18.6071	22.4843	19.3893	21.0954	18.5299	21.7333	19.9583	19.2389	23.1589	19.9885	22.1139	21.1631	22.322	21.0407	20.399	19.5069	20.3135	23.2909	23.2535	19.6889	20.34	20.7162	21.4749	22.4034	20.109	19.973	22.5671	23.7426	19.0016	18.521	18.0706	18.946	23.0957	20.9678	19.7604
19.7767	19.5143	18.7953	18.9183	20.7818	18.5329	20.3431	21.3302	20.0052	21.4191	20.3051	21.0494	18.1618	21.4357	17.7934	22.8069	19.9275	18.97	18.6929	17.9725	18.0916	17.1154	21.2243	19.0961	20.1154	18.0551	20.3719	20.9417	21.9604	20.0414	20.4642	21.5472	21.0931	21.2985	19.369	19.9673	20.8759	21.6452	21.7015	22.8898	19.2679	22.9728	21.6784	19.9889	20.3248	21.4062	20.2456	23.3035	19.965	18.2111
19.5132	18.9625	21.899	20.48	23.3822	17.813	20.2741	21.7383	19.4166	21.3348	20.2676	20.3815	18.8717	22.5496	20.3778	19.0239	20.314	18.985	20.2028	17.4041	20.4548	20.7173	18.2728	21.4291	20.2543	17.8236	20.0085	22.4605	20.4813	19.4053	19.9961	19.9767	22.732	21.2143	18.753	19.3043	21.313	19.0713	20.0855	20.932	19.9394	21.4285	20.4618	19.3402	18.9334	18.2619	20.3073	21.8123	21.9186	19.6504
21.0192	17.4957	18.1812	18.9952	20.5069	17.9108	17.4458	21.109	19.1918	19.9615	19.4044	20.1458	18.6105	20.5862	19.3043	18.652	19.5499	18.2677	19.9195	18.084	20.831	17.9692	18.6429	22.1754	21.9309	22.4734	20.231	24.0663	20.9163	19.1191	22.7747	20.865	17.9764	20.6853	18.9291	19.006	21.4814	18.9058	20.8161	20.1871	19.5991	18.3931	20.4907	22.2476	20.2261	19.7062	20.8809	20.511	20.8966	17.7513
24.1536	23.6181	20.9029	23.0157	20.3222	21.0942	25.0639	20.7155	25.3284	22.999	24.7691	19.6919	18.2379	23.5343	17.5391	25.172	20.7188	21.9919	20.813	22.0825	19.3192	22.9152	22.9574	21.3394	22.8294	22.024	20.3712	23.3677	25.7519	19.8334	22.7916	24.3327	24.6156	20.9563	22.7462	23.608	21.0648	23.3785	23.418	23.9339	24.6912	24.1702	23.46	23.3026	23.964	23.8136	19.1364	20.6065	19.6673	21.4765
23.3428	16.8221	22.0008	22.1744	23.068	21.1886	21.2019	20.5385	22.4132	22.2886	22.2544	22.8293	18.3447	21.1138	22.1296	23.9322	19.5634	23.4801	22.1494	22.7427	22.4699	19.3448	18.579	22.0654	22.523	21.6823	22.4515	21.8319	24.0029	22.4536	22.0651	22.8269	21.233	21.6147	22.3396	19.7505	21.3496	20.6597	23.968	20.7954	22.2227	23.1291	21.8547	22.394	20.0666	17.7305	18.1361	20.2975	21.9565	20.8629
19.7573	17.2345	18.7393	19.2536	21.8444	19.3724	21.1698	22.5469	21.7987	19.9059	19.7858	23.6128	20.0269	23.0506	20.6814	19.8068	18.9174	17.6883	18.7932	18.9677	18.2778	19.6671	21.708	19.5387	20.7787	18.8239	22.8636	20.9735	20.7562	20.0436	21.8605	21.2542	23.2142	21.513	19.1217	19.9696	20.2161	17.1431	20.793	18.9155	19.9467	23.0976	20.7015	22.4416	18.5204	18.1303	18.1295	23.1868	21.5327	19.2614
22.6309	17.4945	21.1922	19.1123	19.8434	19.3916	22.7139	24.2035	23.4853	21.9133	23.2313	24.2672	19.1211	23.0916	20.6021	23.4217	21.3479	20.8647	18.088	20.4774	19.7614	18.9533	21.6086	22.0126	23.7961	18.6384	22.6831	23.3736	24.4281	18.1176	21.9843	22.1999	23.0968	21.3415	21.4474	17.9622	21.322	22.0073	23.0685	24.4298	21.5848	23.841	21.2349	21.2669	23.0139	20.0068	19.62	24.233	23.272	20.1299
23.5786	19.8523	22.9091	23.5436	22.9213	23.9812	24.9202	20.9804	24.0788	21.8133	20.8446	23.41	22.2267	23.6998	23.1167	21.9435	22.5728	22.4335	23.4109	23.9217	23.2583	21.4357	18.8266	24.3286	23.532	23.9113	21.0412	20.2309	23.2232	22.7478	22.3391	22.7194	20.426	24.9901	22.5713	21.2331	22.8422	21.8571	23.3727	20.4002	24.3532	23.8286	23.4096	22.2272	19.8767	17.3305	20.6515	21.2523	20.6448	18.4512
19.3726	18.7365	20.4086	20.9773	20.3675	19.8386	20.6596	21.1104	21.0228	18.9129	20.0991	19.8217	19.5213	21.428	20.7735	18.3523	18.3956	21.4728	21.238	21.242	20.9166	20.0156	19.5047	20.7482	21.0907	20.6966	21.1917	22.5247	20.5279	19.1466	21.3966	20.5519	17.7373	21.3936	19.849	20.8038	20.2706	16.8636	20.6929	20.9953	19.7994	20.1715	20.3988	20.1974	20.6567	20.7374	20.7468	19.9145	22.776	18.8788
20.1727	21.5152	21.1427	24.7194	23.7027	16.8856	23.931	19.919	21.224	19.5658	23.2829	23.9339	23.9151	22.9646	18.8643	24.114	22.6914	23.0683	21.4957	18.6911	22.7397	19.645	19.1197	21.2512	20.5783	20.1329	24.9805	22.6596	24.7946	20.3507	23.7221	24.1246	18.7704	21.064	20.2819	19.0346	22.0911	20.2396	24.3649	23.347	23.3836	24.571	21.1739	24.4296	19.149	24.2296	25.1499	24.6466	24.6699	21.1917
20.1245	19.0155	18.8355	19.9321	21.2108	20.164	17.9827	21.5196	19.9973	21.0826	18.74	22.3242	19.8501	24.209	17.5149	18.8271	17.8634	21.5338	18.1838	20.1794	21.8178	18.9858	20.5479	20.5375	22.7914	18.6425	23.2513	20.7191	20.5934	19.383	20.633	19.4812	18.5788	21.2045	19.5711	20.2896	20.4535	20.318	18.8598	22.9838	21.1703	19.1702	21.4975	20.7304	19.533	19.7296	18.9147	20.8398	20.6537	19.1872
22.2086	24.76	21.8105	20.4202	22.9941	20.3811	21.2502	23.5848	21.309	20.6293	18.1159	20.6865	19.6384	24.1903	22.617	19.1291	22.0632	20.9218	20.1414	19.9504	19.9539	18.6892	19.6727	21.4904	22.4747	21.3469	23.5748	23.3433	21.6241	21.0648	23.0421	23.0747	20.6579	20.9077	21.9253	20.0459	22.346	21.1119	21.8197	20.3804	21.1956	22.3037	21.6581	23.2968	19.81	19.6553	22.7019	20.0078	22.1252	19.3382
23.6876	19.936	23.402	24.8862	20.7849	24.6856	24.5758	20.5555	23.233	23.9792	18.498	19.9636	18.424	21.76	24.4701	23.2403	23.4222	24.5771	24.1758	23.1478	21.6085	19.7883	22.3021	24.0195	21.4981	23.33	20.7606	20.6533	21.0691	24.2991	20.7941	22.3508	23.2033	21.014	18.8307	25.27	24.129	21.6477	23.1396	21.762	19.1273	21.7188	21.2149	24.2885	19.9457	23.1999	18.9583	20.2426	21.207	18.8493
19.263	18.2163	18.4298	17.5255	24.2863	22.7875	17.7367	21.3003	19.3849	21.1272	21.1281	23.4859	21.759	22.2269	21.546	18.6531	18.5	20.5238	18.6035	18.7788	22.8498	19.4294	17.8033	21.825	21.9135	21.379	19.6846	21.0298	21.3143	24.7276	19.9369	20.8764	20.1223	21.5533	19.6412	21.2886	20.3535	18.3204	18.5465	20.058	24.4478	20.8074	21.3622	19.6444	19.5066	18.5817	21.0123	20.4758	20.1204	20.3601
20.542	16.2216	17.491	21.193	21.0504	18.2458	18.9438	20.7018	20.6761	19.4778	18.7388	21.9867	17.769	22.302	21.9536	18.3122	19.3273	20.5507	17.9273	21.4965	19.3645	19.6473	19.5187	21.4429	22.2754	18.707	20.8997	20.9842	21.5157	20.2547	21.4404	19.5499	18.5831	21.0706	20.9454	19.2811	20.934	16.837	20.5906	19.4696	20.1053	19.4673	22.2348	18.9608	20.8634	18.1114	19.2757	19.2535	20.3971	18.2434
20.9593	18.4743	19.8688	18.3949	22.0143	18.2942	18.7993	21.241	19.9697	20.4902	19.8897	21.2915	18.17	20.7648	18.7974	19.643	19.0683	17.0974	19.6155	18.4448	18.5988	17.6514	19.9822	17.7782	21.0181	18.2563	20.8136	19.7191	20.6419	19.2754	19.0815	21.1972	18.6497	21.4194	20.2867	20.1896	21.2797	18.2468	19.2889	21.7492	19.58	19.9046	21.5777	19.8841	18.9624	18.3165	20.079	18.8942	20.5968	18.391
25.1041	28.275	30.8638	30.6996	20.8954	28.9362	32.5964	22.8845	26.4617	25.5784	31.5497	24.8807	28.1814	25.9446	30.8656	32.3187	25.9423	24.5887	29.6759	30.2482	28.641	31.1629	31.3374	30.6776	24.5754	31.1807	24.459	24.7372	20.2406	29.8965	27.9006	29.2495	33.1591	25.8347	23.5388	27.0022	25.4403	32.135	26.5846	24.3088	27.0597	22.7631	24.9137	28.6155	26.6564	32.2023	33.2817	23.9489	25.2788	24.8983
19.8294	22.8458	20.9497	19.7955	20.591	20.7421	18.6022	20.6352	21.9164	20.5942	20.1482	23.0548	18.4227	24.0796	21.1271	19.5834	20.4617	17.8042	17.1796	19.3269	18.0928	18.7176	18.9209	19.6577	22.5261	21.3768	22.9654	22.4801	20.4863	18.9298	18.293	22.0645	18.1842	21.4255	20.4576	19.1689	23.2165	19.9276	21.9888	21.1607	21.1084	20.7663	20.6595	20.7696	19.095	19.5749	18.8198	20.0925	20.6946	18.7624
19.7531	21.8146	22.0295	20.1237	24.5918	19.1086	21.8459	23.166	22.2917	19.9812	19.4077	21.6771	22.3335	19.565	20.3187	18.5175	22.0479	18.7228	19.9958	21.5491	21.3858	19.9655	17.8877	22.2458	20.0445	21.3365	20.2722	21.8471	20.6412	22.7674	22.4249	21.5913	19.4875	20.4223	19.9868	18.8087	23.3373	19.6122	21.6634	22.8563	21.8646	19.8166	21.496	20.1351	19.4285	17.737	19.9871	22.4817	20.3781	19.1315
25.2041	22.5405	24.6553	20.3084	22.3982	23.5813	25.5826	24.0021	25.2683	24.8581	25.1018	25.0615	22.2872	25.1419	23.5931	25.0683	23.4607	23.699	23.3472	24.2316	22.9557	24.3302	23.3823	23.2198	25.3172	23.7282	23.5453	24.7934	25.3275	24.1645	24.5411	19.7807	25.026	21.7482	23.0876	22.9618	19.2298	23.9412	23.993	24.8104	23.3638	25.7649	22.3601	22.28	23.8238	21.657	24.8006	25.3877	24.7379	23.7792
23.9173	18.3147	23.3499	24.2365	22.0974	22.8566	23.5882	21.5823	23.3118	23.1782	21.3094	22.6745	21.2436	22.6594	23.0128	24.5557	23.7962	23.4869	23.0434	23.6824	22.7034	18.9627	18.1715	22.8297	22.8337	23.0911	20.5496	24.2607	24.6591	23.1675	24.0411	24.3775	23.1751	25.062	23.9664	23.6618	21.8269	24.4913	23.5075	23.7548	23.5052	24.2379	22.6064	23.6767	21.4126	18.7033	22.0147	21.0007	23.2991	17.1975
22.075	17.311	22.3024	19.3969	20.5985	22.66	24.2562	20.4214	22.4835	21.1215	17.5594	20.4995	19.6304	21.9253	22.9031	19.2183	23.1953	18.4353	22.8073	22.1758	21.7865	22.6681	18.0164	21.9859	20.6288	21.0296	21.1193	21.0968	21.3811	18.2644	20.0094	19.6545	21.8678	21.2375	19.9985	18.1152	21.7416	18.3584	20.5519	20.3966	22.3924	19.7354	21.9893	19.5656	19.76	18.547	20.4743	20.0852	21.356	18.525
22.2458	17.8252	20.4911	20.4785	20.4621	20.7905	21.3499	20.0098	21.8852	21.8176	19.6468	20.8184	19.9016	22.5767	21.3484	18.7333	22.6959	19.4433	21.1171	21.7684	22.0334	19.866	19.0242	20.5066	22.0078	20.611	20.9438	22.6039	21.5473	22.834	21.518	19.7554	21.4367	21.7554	19.7875	18.3134	21.9503	21.0603	21.8982	19.6869	21.5344	22.1252	23.0889	19.7085	18.0231	20.7307	20.7162	19.8733	19.9859	19.962
21.1147	19.0209	19.1582	20.1012	21.9636	20.4768	21.23	23.1949	18.4294	19.9203	19.4988	20.2947	19.1246	24.4083	22.0419	20.72	19.1504	22.573	21.0572	21.7056	20.7062	18.8511	18.9169	21.3622	21.569	18.9603	20.9972	22.3393	21.0712	20.8937	21.5906	20.3869	18.23	22.2099	19.0512	18.5303	19.8455	17.5734	21.0415	22.0824	21.6709	20.4079	20.9099	20.787	19.2153	18.3353	20.0488	20.6424	20.0814	19.7161
21.1694	18.8813	21.0618	19.4299	19.986	20.1712	21.4624	23.1539	19.6336	18.2284	18.5689	22.3649	17.1851	22.6311	21.6569	19.1239	20.0497	21.304	19.7225	20.9606	21.4946	18.4931	19.4531	20.9325	21.0942	19.6921	20.6598	19.5357	21.2031	18.4546	23.0617	20.823	19.408	21.2545	19.6238	21.1488	22.5379	17.6802	22.4553	22.1728	21.8907	20.2079	20.634	21.1788	20.5059	16.846	20.2707	19.5778	20.3218	18.5135
19.627	18.556	19.9161	19.1279	20.3562	18.6767	20.1897	20.1275	20.9314	17.9832	19.0453	22.0292	19.3754	20.1245	20.8068	19.6642	20.3382	19.9824	20.8942	19.2035	21.844	17.8035	16.2733	20.2831	21.2174	20.4145	21.9048	22.5402	19.8829	18.6627	21.018	18.2369	19.0442	20.9431	19.413	19.3492	19.7289	19.2738	20.5468	21.4807	22.7781	19.7379	20.4049	19.3116	19.205	18.3448	21.5846	19.8841	20.5607	18.1783
20.1898	18.6549	19.5038	19.8817	20.22	18.6922	20.6835	20.2562	19.5826	21.0142	20.0239	19.7492	19.2202	21.0259	20.3263	19.5988	19.6636	18.5264	18.5119	18.281	19.1451	18.0006	20.3019	17.9904	20.878	18.3006	20.8036	23.1038	21.2249	21.175	21.7172	21.5134	18.4086	20.3739	19.1125	19.8366	20.8373	16.5623	22.2962	22.7544	18.6656	20.8252	21.234	19.6102	18.9039	20.9677	19.7727	23.1692	22.1407	19.3951
21.0931	18.0296	18.3294	22.3759	20.0256	17.9534	20.7974	21.8102	21.7628	21.8303	22.4654	19.9217	18.2444	22.581	20.0394	20.3992	19.548	20.3918	20.3708	22.1276	19.0817	18.2162	17.2283	19.6835	20.8864	19.4412	20.6086	22.5157	21.7681	19.4484	20.8423	19.0136	20.8818	21.2422	19.1987	19.0363	21.0697	19.8353	19.2403	22.2306	22.5893	21.9762	21.1485	19.0129	19.9967	20.234	20.5952	21.813	22.0013	17.7107
24.3769	25.6805	26.74	26.2099	24.544	27.7444	27.9821	23.6279	27.4091	25.1938	27.0982	20.3464	26.6097	25.1772	28.3076	26.9261	25.2557	26.2627	27.8089	26.8549	29.0822	25.0162	25.7645	29.604	20.7343	28.7891	21.1606	27.2382	21.1298	27.5889	28.3514	27.0196	26.1746	20.3519	20.5556	29.3019	21.9323	26.4912	27.8547	19.7922	26.6057	24.7976	26.3701	28.3167	26.464	28.827	19.2125	24.6245	26.7914	25.7793
24.2865	18.296	24.3076	26.4568	24.0677	24.6973	23.717	20.7422	24.3696	24.4978	22.1797	23.5499	25.6086	23.0848	24.0314	22.8475	24.6901	25.7967	25.0621	24.8919	25.9278	23.7317	18.7669	23.5398	23.6131	25.5648	20.6666	24.5564	25.4561	24.7802	25.4871	23.4096	22.5527	20.7223	19.825	24.0732	20.555	22.6935	24.9212	22.6643	22.9322	23.4682	25.7953	25.6409	21.9507	16.8978	20.472	20.698	19.3089	18.1953
22.2409	17.9346	21.2952	22.1277	20.0813	19.6461	18.6066	21.0315	21.6885	22.5043	19.7225	21.5041	18.7443	22.6783	18.8989	17.7829	18.6843	19.0962	19.3571	19.8663	21.0061	20.1793	21.1246	19.192	20.2035	18.4736	21.0236	21.8023	22.8481	19.916	18.0547	20.6971	21.0251	20.4489	20.1478	21.6869	23.6861	20.9609	22.1288	20.509	19.7714	22.4849	20.3864	20.8044	20.9054	19.1307	21.2149	23.597	22.1759	19.4831
22.694	18.9578	23.0378	22.5434	22.5896	22.4571	20.1455	23.6007	23.8995	23.6078	23.374	21.3073	23.2342	23.6446	22.7109	23.177	22.6611	23.1721	22.8384	22.2782	22.6936	20.8197	21.9826	22.0704	20.6162	22.9434	21.0298	23.426	24.1438	22.3156	22.9757	23.1733	22.7216	21.1358	22.1484	21.5588	22.3534	23.9368	23.0523	23.9535	23.3769	24.3712	21.3781	23.5095	24.3945	17.4082	19.5895	24.399	25.033	23.6466
19.4703	18.7039	21.2179	22.0275	23.7576	20.7699	21.4666	22.1296	21.1607	22.6064	19.2347	20.822	19.4549	20.7694	22.3022	20.7729	20.1686	21.8951	22.1064	22.0737	21.571	19.515	18.329	20.5049	23.6365	21.5331	21.36	24.37	20.8382	20.5511	19.2967	20.5581	18.7167	23.0403	22.4499	19.1152	22.0284	18.9862	20.2081	21.9398	22.4431	19.5574	21.9752	19.9473	18.9192	16.897	18.8292	21.0959	21.0983	20.1127
20.137	18.7154	20.9461	26.2007	20.4863	16.7479	18.1963	22.7167	19.9224	17.9598	21.7534	20.9479	24.4504	23.7732	18.1848	18.8917	22.3705	25.7507	18.9341	18.8095	21.0903	18.7193	19.5171	19.1006	23.2206	20.6196	20.8374	20.4916	21.3972	21.6912	25.3336	19.9088	18.2312	22.0105	21.5077	23.3631	21.321	22.4248	24.8912	21.0474	23.6471	18.1808	20.7135	24.8928	20.0758	18.576	20.0776	20.0033	20.1607	18.3839
18.6692	19.3599	21.4961	18.0712	24.6721	20.9125	18.2434	22.6692	21.9956	19.1969	20.4961	20.601	19.551	21.841	18.2819	20.8196	22.7758	20.2019	20.744	19.5369	21.8425	21.3547	22.1445	20.2583	20.2477	21.4375	21.8326	19.5182	23.524	18.3484	22.2727	20.8751	19.2409	21.6397	21.3612	20.5836	20.9264	18.5153	20.3779	22.9088	21.3663	20.6882	20.9992	19.596	20.6412	19.5415	19.9489	19.3769	19.9437	17.3862
23.4477	16.812	24.4803	23.2643	22.9792	23.1174	21.4573	20.0617	21.9362	22.3266	19.4588	20.6096	20.2357	22.2698	24.0198	25.6665	23.92	23.1872	24.4206	23.2299	23.9052	23.6639	21.0168	24.5826	23.2637	24.0816	20.8547	24.1614	23.556	22.3704	22.5369	22.8624	24.3312	21.3323	21.9254	23.149	21.928	24.1784	23.5135	24.2799	24.2252	24.673	23.3359	22.7818	23.5171	17.6751	24.4833	24.7851	21.718	18.8632
22.8469	20.1834	23.4105	23.6054	20.695	23.7794	23.762	20.6033	21.081	24.4706	22.8271	20.4542	18.943	25.0645	23.1087	24.5295	21.7428	22.9832	23.3627	24.1457	23.5439	22.5487	23.3273	23.3063	20.3098	18.7719	20.5361	23.0531	26.0435	24.9675	18.032	23.417	23.0593	22.9564	23.2033	24.3642	21.0538	23.259	23.8071	23.0915	23.9427	23.3128	24.1386	22.978	24.1796	22.6511	18.8012	23.6568	24.0504	22.8512
23.5054	19.3276	23.6074	23.6625	23.1529	23.8629	25.1325	21.4748	24.2654	22.5665	19.4815	19.9116	22.0949	24.2815	24.4774	20.2239	23.0656	23.163	23.1276	24.6376	23.4721	21.9146	19.1026	22.7521	23.2851	22.694	20.6434	21.7221	21.4674	21.8949	19.234	23.1907	21.4062	20.9909	22.7621	22.7597	23.061	18.5322	22.791	24.1474	24.9585	23.3199	20.3042	21.2171	19.0886	18.1505	20.2945	19.3727	22.0976	19.8853
21.9296	18.3587	19.5943	19.1569	20.8665	19.6598	22.9029	21.0347	20.3738	20.6717	19.1466	20.3335	19.202	22.1874	22.1356	19.6382	21.6958	18.0089	21.1304	21.6188	17.9487	17.8905	18.3653	21.2106	21.288	21.6484	22.5268	20.4433	21.2736	20.3955	20.6669	20.1046	20.1005	20.5227	19.2626	19.842	20.5784	17.7266	20.7159	19.7673	19.305	18.6903	21.0589	19.7492	18.1984	18.4934	19.8326	20.3062	20.7313	19.9797
26.8914	26.7433	27.1717	27.8924	23.4872	27.6041	29.2884	24.5651	27.2115	27.5161	26.6875	24.1111	27.7502	25.8878	28.0594	28.7196	27.2455	28.0567	27.7935	27.8462	28.5167	23.9008	26.1364	28.6967	24.2939	27.4976	24.2962	28.5982	26.1072	27.1306	29.2075	27.9296	27.2624	24.294	25.7149	27.632	27.164	28.0907	28.5042	22.9978	27.3889	27.9542	26.1124	27.0235	27.3098	28.4094	27.9447	27.2556	26.9224	27.3049
24.961	23.1188	23.3581	21.8623	25.0248	24.886	26.8104	25.4605	25.7347	23.9953	21.3494	24.8895	23.4399	26.7691	26.608	24.2554	25.9002	22.0109	24.8179	24.3636	24.7714	23.595	18.0335	26.0176	24.2092	24.3978	24.813	25.8894	23.0782	26.1559	25.4279	24.3419	24.6629	21.2615	22.5645	21.4196	25.7635	23.2815	24.6808	25.1933	24.8653	24.5427	26.2624	24.1709	23.2141	24.2933	24.2042	25.3364	24.312	22.8119
21.6134	20.2036	19.1127	21.0567	20.1227	20.8716	22.1136	21.1489	19.0337	20.3949	20.0948	20.1783	18.8506	21.4655	22.7604	21.194	18.0185	19.657	22.3672	21.824	21.5312	18.7978	18.8615	21.6538	22.158	22.278	19.9535	23.2414	21.3325	22.1174	22.1652	21.4336	19.6432	21.4967	18.7343	20.7581	20.3646	17.0758	21.8522	20.2589	22.4376	19.3387	21.415	19.3165	18.1925	18.6613	21.1937	20.9523	19.641	18.1643
20.1132	20.9607	24.0719	22.2438	24.2786	28.051	24.7918	23.375	26.5641	26.1401	24.4194	24.5835	21.3874	24.7184	22.8897	26.6016	22.2295	26.7705	27.3739	23.4062	22.3427	24.1441	25.3368	24.7828	26.5671	25.4897	26.808	25.8285	25.1276	22.6632	24.205	25.5276	26.5389	21.8144	23.9869	23.9249	26.23	24.0118	27.6498	25.6137	26.6125	26.16	26.4074	22.7438	23.7058	23.6493	25.803	22.1593	23.2708	25.8537
20.6027	18.3909	23.688	22.9215	19.7811	27.4335	26.5386	24.1075	21.4362	25.7665	21.3731	21.786	22.7864	21.2227	23.5748	26.2648	20.8406	25.7007	26.9794	21.1396	21.6082	23.105	24.6051	25.1125	23.2427	25.7239	20.8422	24.6438	20.96	23.0225	24.9941	25.6301	27.1984	20.9427	23.3594	22.6157	24.5546	24.1132	27.1629	20.7017	26.0304	24.479	26.5431	22.7302	23.3705	25.3118	26.7413	22.9042	22.8822	26.3476
21.1671	17.8001	22.1832	20.4275	19.9902	17.4759	20.7875	20.8343	20.2406	19.2948	21.7459	19.9568	19.8456	20.7907	22.7788	22.4795	20.8279	17.2695	21.9129	17.7287	18.6936	20.2578	20.7388	21.9284	20.7613	22.5427	19.931	24.6746	22.4331	19.2239	22.8736	23.5983	22.5437	22.7141	19.0577	20.0344	20.8348	19.8361	22.4986	21.9775	22.4085	23.0152	21.2592	20.0381	21.4768	18.1178	19.2938	21.0119	19.9547	22.1032
26.8309	27.7858	24.4573	26.0608	20.122	24.9398	24.6105	22.5241	28.1871	27.1694	26.8607	24.4831	27.5269	20.5963	25.8705	27.6753	26.1111	26.7439	26.1951	24.5052	26.184	25.6737	27.5654	27.2093	20.994	26.068	20.8225	24.4983	27.3616	26.1587	27.5577	24.9374	26.1671	21.7427	26.6027	25.364	26.988	26.4729	27.3828	23.9046	26.4775	25.4854	26.0777	25.7562	27.0983	25.2917	27.1035	25.5406	25.5847	26.2536
25.8439	16.7202	23.4691	24.7616	20.7519	25.1664	26.8218	24.9972	23.6932	27.3639	26.6688	23.31	18.9551	24.5136	25.5702	28.3387	23.3168	23.852	22.6437	24.429	24.4566	22.5236	24.0267	26.0817	21.1852	24.5098	20.3101	26.876	29.0275	21.102	26.3476	25.2656	27.69	21.4172	19.2616	24.2816	24.2642	26.5054	27.4149	26.2056	22.7544	25.5161	21.6123	25.9655	27.506	26.9506	24.1751	26.7904	22.6098	26.741
18.4564	18.3676	20.3857	22.8112	20.8934	20.4124	19.455	20.8421	19.926	21.0419	22.1608	20.0203	19.5986	21.0814	19.7316	19.7354	19.1792	22.628	20.4346	21.7842	18.5932	18.9535	19.1052	19.1439	20.3559	19.2781	20.0303	21.5461	23.8825	20.6327	20.3981	20.538	19.1801	21.2696	22.6731	23.1543	20.8983	16.4121	21.2126	21.6231	22.0891	19.2807	22.0363	19.9213	19.519	19.7974	19.724	19.8645	20.7883	18.2075
25.5347	25.9248	23.1458	23.5141	20.4881	22.9661	26.9017	20.7011	25.0587	25.4451	23.1915	21.0201	24.7243	21.2241	25.8849	23.2841	25.5485	23.0931	22.2234	22.2056	27.507	21.3441	25.2009	25.9555	19.975	25.7309	20.7333	21.3392	23.6169	24.3031	24.7486	23.2811	24.2968	22.5083	20.2358	24.635	22.109	25.3685	26.7543	19.7626	23.5803	24.944	20.6307	25.0598	25.6376	27.0853	28.6543	19.8918	20.8279	24.9835
29.1144	27.282	26.1834	29.734	24.1981	26.8223	24.2278	21.4965	29.0975	29.0413	26.7428	22.6449	25.3651	23.9848	25.2467	26.8767	24.1466	23.5552	26.8116	25.8535	28.3054	24.5341	27.7561	28.7053	24.0594	28.171	25.5851	28.5359	27.9357	21.4304	28.9908	28.2182	23.5681	26.499	28.0853	28.1117	27.3073	28.3525	27.705	25.5897	25.1463	24.9323	26.1195	26.5776	26.7116	25.341	18.6774	21.9381	24.3425	20.2429
21.086	16.6784	20.5118	19.4064	19.4765	19.8836	17.2949	21.2907	21.0441	18.606	19.2462	20.4817	19.6099	22.6425	21.4435	17.4946	19.8602	21.7361	20.7666	20.7312	19.1676	19.5204	16.8727	20.89	23.1025	18.3018	21.1945	20.4221	21.1187	19.5821	19.3291	19.9383	18.0928	20.6824	20.4546	19.5043	21.0554	17.206	19.3499	22.6856	22.3521	18.8047	21.3832	19.7632	20.437	17.4441	19.8139	21.1782	21.1958	18.522
22.5722	17.3811	21.5716	20.3263	23.4887	18.4222	22.359	24.3694	21.008	18.6996	19.8595	20.7196	17.7592	19.9162	24.0692	20.6072	23.0508	22.8563	22.8842	23.3747	21.724	19.7117	18.0654	22.9711	20.2082	23.1534	21.6285	20.5165	20.9034	22.733	18.6598	19.6685	20.2811	22.5547	19.8277	23.1841	23.7511	18.2377	18.7551	20.4329	22.1693	21.6616	22.3641	21.1926	20.5218	17.6082	20.3502	20.0906	20.0768	19.318
23.1498	26.2407	23.2563	21.1538	20.619	22.0046	23.8795	20.2091	23.4851	24.3662	19.8702	23.3235	22.741	22.525	22.0595	25.4619	21.1057	23.842	21.5637	22.9039	22.3911	23.624	19.935	24.3045	20.3552	22.6497	19.879	21.641	23.6922	21.1419	24.0701	23.4957	24.1629	21.3622	22.5416	22.5409	23.7018	24.0055	24.1911	22.3024	22.6078	22.9614	20.8494	25.0575	18.8914	18.0212	20.8486	23.6752	21.5697	23.4621
25.0278	16.8625	24.7241	21.5355	23.2538	24.2527	24.9179	24.6823	25.6229	25.185	21.8516	20.915	20.2051	23.4551	25.8732	22.5402	22.4709	22.3692	24.6886	25.0144	21.7674	23.9995	22.695	24.6984	24.5112	25.6491	21.249	20.0014	21.513	19.9212	18.7508	23.2341	26.6678	25.7595	18.2633	22.978	19.6162	24.1735	22.6944	24.2157	22.9496	26.2462	21.0461	23.6274	23.7718	22.2134	20.1156	20.5937	23.3839	22.6487
21.4545	19.7073	19.6087	23.5287	20.538	21.9195	18.4272	20.5917	24.3059	25.3377	18.1065	23.227	19.263	20.6149	17.265	18.8224	18.1673	18.5584	18.9492	18.8004	19.0981	19.1847	20.3502	20.4877	21.0575	19.2794	20.9344	22.6736	20.9674	20.1058	22.3025	21.2576	18.8077	21.4583	23.5847	24.1156	23.8017	23.4706	18.9536	21.6458	21.29	19.6751	21.0742	18.6511	18.9301	18.4315	20.6472	19.8051	19.4353	18.0703
18.4361	19.0208	20.1062	18.9282	20.029	20.1781	20.9687	20.4509	22.2522	17.7188	19.5396	19.6782	21.0568	24.8358	22.1382	20.1083	21.8773	17.4348	21.23	19.6112	18.4454	18.9616	18.3395	21.9938	22.154	19.3586	20.1058	21.1172	21.3685	19.0103	17.7978	20.54	18.7113	20.8119	19.9049	19.28	21.2848	19.6524	20.6583	21.5095	18.1027	21.1276	21.8447	18.6898	19.2126	17.7572	19.1691	20.8413	20.387	19.7097
19.5093	19.8253	21.8727	24.0712	20.2898	21.5212	18.2446	20.2501	20.7067	19.0201	25.2442	19.9165	23.3236	21.4327	18.6141	18.9275	20.2393	21.2113	24.8852	18.3032	26.6067	18.1373	19.3499	20.0718	21.2152	20.9087	22.621	19.3379	20.2346	19.5972	19.0622	18.7245	19.2625	21.1938	19.1178	18.4509	20.5618	18.0171	23.9894	20.2017	18.7135	20.0521	21.8986	20.3572	19.9275	19.3548	23.4341	20.9928	21.0487	19.9494
20.7888	16.5821	18.1362	18.2261	20.8254	18.126	19.2831	20.3076	20.8401	19.8456	21.2491	20.0667	19.2943	21.8362	19.47	18.1882	18.7052	18.5489	17.6409	19.8624	17.1678	18.7783	18.2147	18.1202	22.1571	19.2206	20.8619	20.3111	21.7332	19.6099	19.8643	19.6944	19.1958	23.3586	19.521	19.0956	21.2132	18.657	18.0541	20.3054	18.1735	20.0384	20.173	19.0709	18.8069	17.7444	20.3023	20.5748	21.1098	19.2881
20.5487	19.1218	20.3949	18.4268	20.6604	18.4911	20.005	21.2143	21.1129	19.4324	19.5694	19.6268	19.9047	21.4498	20.2824	18.2887	20.165	19.7355	20.2792	18.9348	19.4406	18.5424	17.8142	19.8048	21.2994	18.7553	21.1027	20.9284	21.156	20.2519	20.7456	20.8295	17.3435	20.5691	20.3493	18.8583	20.4814	18.513	19.0013	21.0884	20.1962	19.24	21.189	20.2659	19.8457	17.3717	19.4984	20.7138	19.9347	19.508
22.8803	18.5386	23.618	23.0474	23.5965	23.6281	25.1484	20.7261	24.8545	23.7872	19.0221	23.6422	22.7733	23.3718	24.2317	23.4078	22.7206	21.9836	24.0356	22.8096	24.8531	22.8026	20.365	26.0715	25.142	23.759	21.4279	25.7751	22.2551	24.1259	24.1666	23.5522	23.5658	23.8915	20.0942	22.8693	24.9695	22.9238	24.3228	23.7828	23.8452	22.5433	24.7579	18.6892	20.2793	22.9187	19.7946	21.5367	24.5578	20.81
21.4454	17.8908	21.0611	18.6464	20.7106	20.7023	19.2206	20.9418	19.138	20.8994	18.0214	20.7844	18.7199	20.7755	21.4361	19.7896	19.6518	19.6151	20.368	20.7936	16.888	18.206	17.0429	17.4626	20.7633	18.1679	20.5357	20.6194	21.1752	19.382	19.4628	19.9173	17.075	20.8492	20.1718	18.52	20.4447	17.4359	18.7414	20.0173	21.3742	19.5585	21.1457	19.943	20.4946	18.7245	19.8369	20.917	19.9626	19.8295
24.0263	17.0025	23.5202	22.0611	20.3934	23.0128	18.1024	21.119	24.708	22.0107	19.5479	20.9456	24.0232	21.3675	22.0668	17.2359	23.1768	18.032	21.8729	21.4363	24.6241	18.3024	24.1323	17.897	23.6149	24.2019	21.0213	26.2723	24.7069	23.3836	19.4772	24.1604	23.959	20.9495	19.6813	23.5079	23.9216	21.7118	25.3607	20.234	18.2578	20.6343	20.6591	23.1739	23.5886	23.0474	21.6827	20.051	21.2801	18.4593
26.5902	18.4042	24.3291	21.2973	23.856	25.4441	27.4046	20.3504	23.966	26.1444	20.6303	24.6554	17.6699	20.7024	27.0113	23.4555	25.1295	23.7752	24.6143	26.1515	24.0191	19.8214	22.8449	25.4795	24.4761	24.9926	21.7281	26.3141	22.4927	24.2922	23.7203	24.6255	26.6857	22.4706	21.3779	23.4026	24.5516	23.6651	25.7939	24.0055	25.6465	25.4618	23.4747	24.6615	20.9601	23.8752	20.9971	20.8399	20.1662	19.7075
22.4812	18.8505	20.105	19.4754	20.5285	18.8518	20.3281	22.7515	18.6094	22.132	18.6338	22.4768	19.2717	20.4678	19.0416	22.3671	20.9829	19.653	17.0447	20.3228	18.1039	19.0035	22.6949	19.2059	23.3801	19.1066	20.2692	21.2391	20.8233	18.5865	18.7904	20.7391	18.6281	21.1853	19.6068	18.617	20.2232	16.6055	19.499	23.4206	18.8799	23.4425	20.4439	20.664	19.9007	19.6525	18.4799	20.2871	23.5285	22.2706
19.5943	19.4533	19.1167	19.9689	20.3452	19.7196	20.6231	19.9973	18.9586	19.4472	22.6333	20.4838	17.6293	20.0159	19.0569	18.6326	19.2965	18.6886	17.7578	19.7513	20.3461	19.3649	17.2634	20.158	19.6355	18.86	20.965	20.6305	23.0648	19.2051	18.2356	19.8158	21.4153	21.05	20.4093	20.1447	19.7259	18.053	19.6728	19.8004	20.2048	19.8244	20.5353	19.2703	20.0981	21.0008	22.4997	20.0269	20.6814	20.4436
18.9967	17.7994	20.3099	19.1586	20.8642	18.2199	18.8376	20.2135	21.0317	20.7551	18.1533	19.3312	20.3007	20.1451	19.6132	19.5187	21.5427	20.1316	18.7243	18.9051	20.3091	19.6618	17.5045	18.4553	20.9092	18.7667	21.0634	20.1019	20.1799	18.9774	17.6698	19.4901	20.5752	20.9653	19.6911	19.3221	19.8681	18.9023	19.6342	20.4474	20.1451	20.0047	21.6831	20.6921	21.2675	18.603	20.0098	21.166	19.8738	18.8329
21.1546	18.6997	19.1549	21.8421	20.3997	18.8067	18.7385	20.3497	18.6217	18.7404	19.3608	20.6329	18.3125	20.2864	18.3241	24.233	20.596	22.3535	18.6847	19.2293	18.3464	18.374	19.9232	17.4779	20.8189	19.3004	20.7328	21.0206	23.5943	18.6528	18.3465	18.8628	22.1861	21.435	20.2101	19.6856	20.0235	16.7911	20.4576	21.6105	18.7413	20.1216	20.5364	21.1712	22.958	22.0807	19.9446	22.1306	20.5727	22.2305
19.078	18.4195	20.9643	21.0941	21.8517	18.6746	19.3053	21.0006	18.6569	18.1693	20.1531	20.5407	22.4306	21.9925	20.0704	19.0752	20.0609	19.5375	22.6189	19.1733	23.9537	17.7826	20.4165	24.1504	20.2515	20.7564	20.4018	22.9503	21.1614	21.7712	19.2262	19.0422	20.3934	19.8074	20.2192	22.5162	23.8928	18.0423	19.2522	21.1011	22.8726	19.1022	24.061	19.6253	20.3869	16.8519	19.2119	19.8109	20.6225	18.4213
20.2911	17.3055	19.9114	18.3147	22.068	17.6868	19.2368	21.1468	20.9934	20.7695	20.8986	19.9607	17.8083	20.8199	17.7321	19.0911	19.2686	21.1972	21.7103	21.2908	21.9871	20.8277	20.0022	21.1172	20.5422	19.2358	20.7927	19.6749	20.155	22.2391	21.1965	19.2383	19.853	20.6233	18.7264	19.9842	21.9008	19.375	21.763	21.0608	18.8837	20.3263	21.431	20.2969	19.1563	17.3906	18.8878	20.5928	20.935	18.0795
25.3321	18.5954	20.2245	19.2386	25.4851	23.9739	26.0674	23.1779	22.7308	17.587	17.8935	20.2578	19.0754	25.7104	26.7294	23.2683	23.393	18.6577	22.9953	24.1137	16.8613	23.0896	18.4152	25.9635	24.8911	22.7302	20.1533	22.5093	20.5737	24.5312	18.9508	24.8134	22.3346	26.6815	20.6993	18.689	20.6106	17.4619	19.1932	20.4788	23.8026	22.0253	20.0776	19.8813	20.2773	18.8224	19.0255	20.5122	21.0902	19.3166
18.227	18.7776	22.6246	20.7251	20.7354	19.3844	22.123	20.728	20.0642	18.2835	20.2467	22.5349	19.9068	21.1375	17.1284	18.3324	19.5722	18.9948	18.3946	19.3902	18.2727	18.1447	21.7423	17.5216	21.1393	17.4423	20.44	23.4783	20.2647	18.7459	20.4323	21.6065	20.7977	20.5083	19.9394	18.0941	22.7262	19.3454	24.5306	24.5884	21.5798	22.2971	20.5496	20.0067	20.9384	21.4888	22.4937	22.6559	24.3517	23.3419
20.0722	17.5513	20.8443	20.1691	22.6565	18.2528	18.6735	21.2289	18.616	20.9306	19.1061	20.6801	17.5356	22.0127	20.9306	20.7508	21.8453	18.6432	20.6114	20.4217	19.6396	20.2094	20.207	19.6365	20.9554	20.3954	20.7839	22.3132	20.7568	19.4224	19.8541	19.979	20.5107	21.3393	19.9647	20.087	20.3863	18.1993	21.4821	21.6904	18.994	21.5534	20.6986	20.5721	19.1222	18.8903	20.7539	20.7287	20.8044	18.7528
22.3261	17.0906	21.3604	19.6325	21.8588	20.5395	19.5681	21.301	20.9299	20.5776	19.5818	20.3759	20.005	22.3431	21.6331	20.5921	21.8841	19.2385	20.7393	20.3344	18.8124	19.7083	20.9118	20.4603	20.6577	19.6891	20.5587	22.2722	21.5505	20.0576	21.7094	21.4669	21.3674	21.7459	18.6543	19.7846	22.2866	19.3782	20.794	22.2523	20.9601	19.7418	21.1779	20.8551	20.2742	17.6004	20.3742	21.2918	22.0455	20.389
21.8521	17.622	21.4442	19.6458	22.0724	21.7784	21.3675	20.8632	23.1365	20.4302	19.9953	23.3592	19.4379	22.5433	20.2109	17.7195	20.6068	19.7795	18.4866	20.135	18.3844	19.0066	21.0149	22.0881	23.5313	20.6075	21.0395	20.4373	22.0298	21.2868	21.5466	19.6959	22.4063	22.3518	19.9464	20.031	19.7887	21.5845	19.5861	21.3105	20.8335	21.6148	21.4542	19.0978	19.9263	16.4984	18.3362	20.9906	21.0125	19.5316
21.056	17.8122	19.6119	19.4053	21.0517	19.1876	17.913	20.8882	20.5947	21.2596	20.5539	20.5298	20.177	20.0729	18.7891	17.0945	20.7554	19.485	20.942	18.4938	21.2065	17.2553	17.1402	17.6819	21.5863	21.7354	19.3737	21.6722	20.0976	22.2526	19.6921	22.0932	19.5774	20.7279	18.6216	19.3252	20.4429	19.1526	20.6354	20.1739	21.9894	17.9452	21.0066	21.6188	19.8117	16.4911	19.0469	20.1019	20.1256	19.0739
19.7137	18.2595	18.2507	18.566	20.5603	17.0955	21.7547	20.7795	23.2595	21.7565	19.0214	20.321	18.8081	20.6675	18.4953	21.6226	19.5197	19.4289	19.0614	19.9964	20.1626	19.2332	18.155	21.2729	20.8084	18.5374	20.2088	22.5464	21.6107	18.8149	19.0381	18.942	20.5142	23.4244	19.1727	17.5639	21.4956	20.0152	21.7751	20.2238	20.3316	21.6383	21.5913	19.2203	18.7903	18.1332	21.6859	21.2938	20.9336	20.4226
19.7266	18.003	23.0599	22.6599	21.4959	23.4502	24.6849	20.2536	21.1104	18.9953	19.8556	20.9123	17.9444	21.6242	22.7795	22.779	19.7229	20.9145	18.932	18.5678	23.2601	19.093	20.2278	25.3998	20.604	23.0956	20.0911	20.2254	21.2632	18.2442	19.5837	21.7677	17.0494	21.0061	18.766	19.5531	20.9639	18.1646	25.2329	20.335	19.2946	19.1689	20.7702	19.5287	20.1193	24.6567	19.9747	20.3714	21.41	18.5399
24.1409	27.0026	26.2586	27.3552	21.1075	26.3862	26.5763	20.523	26.1714	25.6077	26.2724	22.7753	28.0255	21.141	26.371	25.1135	27.0586	27.4606	26.1037	26.0566	28.7967	26.8785	25.9406	26.3922	21.1826	26.9022	20.9416	25.5922	24.2004	28.3196	26.6821	24.9218	27.0056	26.2531	24.1286	27.4672	25.139	23.7872	26.9039	23.6808	26.866	25.3962	23.3881	26.8123	27.341	26.4637	20.3152	19.7159	20.3675	24.9851
19.1133	18.7334	22.5974	18.9785	20.2771	20.3047	17.0555	21.0765	23.8852	19.5568	19.596	23.7863	21.3112	26.6078	24.0503	17.8421	19.9632	18.2302	19.6272	21.8448	17.7054	18.2118	19.788	18.251	22.6282	23.9511	20.6805	23.9664	20.8773	18.8139	19.4609	19.7673	18.4038	21.6175	19.7881	18.5259	24.6662	18.4777	23.0069	20.0208	22.6208	20.4437	24.4916	19.8351	19.7083	19.2696	19.9931	20.4277	20.101	18.9662
18.6179	20.5775	20.7437	22.3585	19.7294	18.243	20.4685	20.906	18.6914	19.4304	18.5637	20.3831	23.0098	21.2664	20.0759	18.8138	18.8836	19.7922	17.2184	18.8164	23.2066	18.6632	18.9633	17.5646	20.6648	18.4689	21.3577	23.4059	20.3481	19.8662	23.9747	21.0954	20.0184	20.6121	20.4587	21.9934	20.7219	21.5348	23.8303	20.5447	20.1345	18.8655	21.2192	18.2295	22.2747	21.8652	20.4091	22.2651	19.8798	17.9292
22.5378	15.6454	21.2722	18.6359	20.5649	21.6366	24.6264	21.472	22.8977	21.084	19.7589	20.7655	19.7412	22.7867	22.5194	18.5096	20.6374	21.4577	21.9899	23.1348	19.3008	19.5905	19.1772	22.0927	21.039	20.0323	20.3158	20.2925	21.1831	23.046	18.5426	20.4246	21.7557	21.0972	21.0897	18.9799	20.7313	20.9874	20.9257	20.8598	22.3835	17.7346	20.9558	22.2405	20.9195	19.3745	19.7351	20.7636	20.6806	19.0553
21.7799	17.1935	19.6751	18.7341	19.7082	22.3473	23.1776	20.9579	20.7382	18.4853	19.9278	20.7722	20.3273	20.921	23.5186	20.1461	20.2904	18.3071	21.116	20.3214	16.5863	19.3049	18.5878	23.918	21.0455	23.1434	20.6005	22.6941	21.449	20.1025	20.3995	20.5986	19.7154	21.548	18.5461	19.9125	22.4756	19.7984	22.6095	20.4599	20.7532	19.6569	21.9404	22.9171	19.2287	17.3562	20.6156	20.6166	20.598	19.5868
24.3109	16.9752	26.4945	26.835	20.0646	26.1003	29.4864	20.6301	22.1286	27.6377	19.36	26.1031	25.1947	20.9296	27.2984	28.3868	25.9846	26.755	25.9816	26.202	27.5018	21.9258	18.6024	28.586	19.9693	27.5811	26.8865	26.2325	26.9702	24.8137	28.447	22.233	23.2604	22.5439	20.538	26.24	20.561	26.9579	28.2922	20.3452	26.0768	23.2591	20.9602	27.6391	19.6116	17.4042	29.1043	20.9496	19.8618	19.3543
22.9591	18.0378	22.0844	20.2808	19.8016	21.898	24.5437	20.7697	22.1919	20.1094	18.7915	19.6723	18.7192	23.8182	23.6639	20.6177	22.7943	18.5655	18.5188	18.6805	18.071	19.3917	18.3382	23.9061	23.5759	22.5192	20.1845	22.3356	21.8081	22.3979	20.9912	20.1192	18.511	21.6061	20.0805	19.6252	19.9666	18.731	21.435	20.9189	20.1496	18.6671	21.2417	23.282	18.6802	19.6671	19.3792	20.7665	20.8197	19.8811
18.1127	18.5518	17.67	19.448	20.4625	19.4652	18.4949	20.5803	19.1212	17.7567	19.4628	21.126	19.5946	20.7748	18.5884	18.606	18.9529	18.4242	19.2817	19.4692	19.0129	18.8427	17.4163	18.0993	21.3916	19.7389	21.2262	20.7124	20.8228	19.4254	20.1207	20.1312	17.7569	21.1271	19.5724	19.7126	20.4288	19.4244	22.4984	19.5377	18.8118	20.0411	21.4127	19.3316	19.6916	17.7539	19.536	21.3495	20.5234	20.5138
20.7897	18.0679	21.0731	19.816	23.0967	17.7107	17.0292	21.1166	23.782	19.0268	18.3646	20.5661	19.3222	20.2346	19.1705	24.5039	20.6582	21.168	24.2096	19.9389	26.6273	19.0766	22.5604	24.9098	20.8438	23.6626	20.1973	20.6179	23.6057	21.1112	23.954	22.3217	17.8594	21.2085	18.8758	23.0701	23.0816	20.9442	27.6723	22.9474	17.9813	20.3469	20.6073	20.5246	24.5129	24.88	20.0553	20.0238	21.3964	23.7019
18.717	19.3233	18.0536	20.1183	20.8961	19.3802	21.2862	20.6367	18.9243	22.1286	18.857	21.6322	18.239	20.6547	19.0395	20.9088	19.1856	19.2442	17.3852	17.1538	18.5414	18.7593	18.1332	17.8543	21.8869	18.5727	20.6938	19.9112	21.3592	17.7355	17.8346	19.9163	21.6353	21.1512	19.9751	19.1604	20.2587	19.0307	20.1081	21.9321	19.2896	20.9465	20.7561	19.322	20.1689	19.1799	20.0307	20.7336	20.1778	18.4163
25.5472	24.9365	27.483	27.3423	21.3041	27.7437	27.2381	23.8763	27.7332	26.0378	24.6767	20.5847	28.0543	23.8086	25.647	25.7306	27.1299	25.1627	26.2853	25.2145	28.59	24.7635	26.8147	26.6877	24.9375	27.113	20.7171	26.2712	21.1923	27.667	27.2914	26.1406	26.9956	22.6007	20.3251	26.6292	27.4967	24.831	28.1911	26.0778	28.1223	26.9	25.7541	24.5924	25.1281	26.0613	23.4838	23.021	23.6766	21.4103
19.5024	19.6731	17.6835	18.807	19.6594	18.3869	18.4222	20.9835	19.7749	19.772	19.0333	20.2433	19.4931	20.5001	18.0597	20.9909	19.0584	19.7324	18.5092	20.6824	18.5584	21.3554	17.8693	22.4979	20.862	17.8425	22.695	21.1257	20.5286	19.644	21.0304	21.3823	22.5324	21.3751	20.7979	19.3956	20.0162	21.6482	21.8989	22.5832	18.2881	18.6536	20.6158	19.0437	23.1779	18.6388	19.6587	23.2742	21.479	19.5393
23.6298	22.9626	22.7538	18.2048	20.9473	21.6238	23.3192	20.9896	22.8968	23.6109	19.4478	19.6193	20.6082	20.2796	24.388	23.6061	23.3663	16.8371	23.2696	17.9902	23.4172	19.6577	20.6591	18.9126	18.1544	24.3608	21.1552	26.0057	21.297	24.776	19.0687	24.2315	23.3404	21.3061	19.5008	22.1358	24.3449	22.5699	23.7585	20.3503	24.232	22.714	23.7889	20.0539	20.3074	17.2517	21.1414	20.23	20.4538	18.7427
24.0608	17.3919	23.8373	24.6843	20.6515	25.5741	25.4509	19.992	26.4074	17.9195	24.5922	20.5713	23.9503	20.3428	25.4926	23.9381	25.3396	25.411	24.2893	23.7343	24.8253	21.2289	17.4931	25.2359	20.528	24.6844	24.1662	22.7099	22.6786	27.8496	19.7928	19.1665	19.3904	21.1006	20.2069	25.5375	26.625	21.5816	24.5567	25.1075	25.9989	24.1751	25.2366	26.1184	19.9601	18.5376	21.8431	22.6776	19.7825	19.0362
29.6908	27.6239	29.1822	30.1276	24.0856	29.0755	30.3273	24.2326	30.2609	28.6932	27.0187	25.6739	30.8867	26.8387	28.4204	28.7381	29.9592	29.5746	29.227	29.0319	31.6403	29.8617	28.304	30.4275	24.5568	30.8488	25.6979	27.3182	24.4782	27.9666	29.8625	29.7266	27.7039	24.1818	28.7127	30.0373	28.3262	30.0555	30.318	26.1797	30.7729	28.6412	29.2876	29.2308	27.7428	29.7018	27.0261	27.9009	24.4445	27.8389
26.358	17.9196	17.7221	22.9993	27.8082	23.0659	20.0828	28.4063	27.8351	25.8428	22.3419	29.6652	19.6703	29.4134	19.7435	19.2087	26.4757	20.5054	19.7064	19.3378	17.7519	18.8536	17.6009	18.7163	29.6229	17.9418	28.7511	26.8017	21.4056	25.0983	26.866	27.1181	16.7855	23.3816	25.8465	24.8346	26.1256	17.6844	24.9145	28.8957	18.4367	27.443	28.6451	26.0527	25.2031	19.0743	25.7874	29.2042	28.9555	26.6126
19.2565	17.1483	20.0995	18.5735	20.323	19.8732	19.648	22.2071	21.1297	19.0174	19.2101	22.701	19.0746	21.8427	20.0951	19.073	19.7968	17.7066	17.9878	20.5952	17.1004	19.4347	19.2999	21.7435	22.7666	20.6552	21.8351	20.6489	21.0406	19.5088	17.9928	19.7496	18.4805	21.3824	19.9872	19.0765	20.0857	19.4387	21.0581	21.7951	22.2764	19.2312	22.0339	20.5582	20.4332	19.3408	19.6653	20.4155	20.5114	19.0781
20.5793	19.0796	21.3043	21.0346	23.9131	19.2612	19.7712	21.3104	23.5218	20.1868	19.061	21.7345	18.4779	21.6355	17.3043	18.0586	20.2365	19.1076	19.6231	19.6536	22.9947	19.4448	20.578	24.4933	23.114	22.3351	21.2147	23.9475	20.675	18.6585	19.0596	19.535	22.4968	21.3391	19.1134	19.98	22.5064	17.7708	22.015	23.6459	19.4482	20.6839	20.8784	18.6555	21.0015	18.6056	20.0892	20.4421	20.8554	20.2278
19.3345	17.172	19.2685	18.8059	19.8726	21.537	22.04	20.8026	19.6171	18.5081	19.8868	23.9248	19.1824	24.1038	24.1241	19.8018	21.4923	20.8656	20.8634	24.0717	16.436	17.7737	18.3851	22.8027	23.5187	19.4242	20.7244	19.3663	21.1067	19.0941	20.1958	19.229	18.2102	23.0981	20.125	19.1714	21.181	18.061	18.5586	19.5658	18.7835	22.4196	21.1628	19.0578	19.1177	18.85	20.3466	21.1687	20.7049	17.7335
19.8216	18.0925	21.6893	19.9163	22.1377	18.3551	18.5324	22.7577	22.9361	20.1055	17.0255	19.5951	22.5746	21.748	19.8299	17.2766	21.7123	19.4359	20.6009	18.9543	22.3157	19.9823	18.7893	21.4717	19.9174	21.6204	20.8077	23.0712	20.4005	22.511	22.6879	19.3167	19.1141	21.9438	20.268	19.7558	20.5912	17.9023	19.5904	20.7764	21.9539	19.6392	21.3536	20.127	20.1262	20.2976	19.1339	19.5922	21.0459	19.2495
19.7119	18.9479	22.8371	21.6642	20.5834	20.8606	21.2058	21.7695	23.3774	24.1361	18.4599	24.7737	18.03	24.7554	22.2966	22.9476	22.7085	18.7089	22.3484	22.2237	21.8576	22.7931	21.9032	20.2974	20.8489	22.0476	20.749	22.6398	20.7172	19.9888	24.6388	22.8418	22.562	23.5369	19.7874	19.766	21.9208	18.8233	23.1273	19.8425	21.992	23.0122	21.4451	25.0314	19.4108	19.2075	19.3579	24.1488	24.6025	22.4397
25.697	26.2666	27.8452	28.523	21.288	28.4585	26.635	21.9181	27.0987	25.2881	23.7744	20.0012	28.473	23.8735	29.1075	25.7535	26.9916	29.5984	29.1716	28.6779	28.9454	26.2575	21.1304	28.1581	23.7218	26.7767	24.2116	23.0654	20.8305	27.7125	26.3907	25.1061	27.1357	21.5986	24.6207	28.343	26.398	27.044	26.7498	22.9707	28.6074	26.0546	24.6071	26.4505	24.8669	25.5684	19.1466	20.5504	20.3455	24.3665
18.892	19.0581	25.032	24.2594	20.8097	20.8997	25.5901	25.8141	24.5714	23.8986	18.2577	19.7015	23.9708	21.3383	24.291	18.6398	24.9467	23.5761	24.9852	22.1926	27.0089	19.1316	19.1214	26.3867	25.0197	23.1304	24.8984	22.8725	21.097	27.8373	24.6922	20.6985	23.9515	21.4719	19.3061	18.0852	26.5583	22.9743	24.6985	20.7101	25.835	22.0427	24.6161	24.8065	19.6744	23.2878	19.542	20.5095	21.4555	19.1849
20.1033	18.1493	18.3663	20.1656	19.9802	21.3324	17.7568	22.254	23.0859	20.5535	19.2423	21.1127	18.5468	22.7379	18.3145	19.4397	17.629	20.1189	20.0896	22.4488	18.7047	20.7514	17.681	20.7002	19.8938	16.902	20.9782	20.3161	20.9441	21.2612	18.5647	19.9544	18.6617	21.1276	20.0931	20.3065	20.8518	19.3716	19.6305	19.5654	21.6977	20.139	21.5365	20.1777	19.712	17.6842	19.9703	20.0506	20.0978	18.4588
22.5366	18.3036	20.6853	19.4512	21.1154	22.3114	23.2626	22.3897	23.5011	23.4557	19.7186	20.4546	18.7317	24.529	23.6217	22.2945	22.3144	21.3794	21.6622	22.9903	21.176	19.1599	17.0195	23.5735	20.2911	21.1224	23.1431	20.8734	20.8483	21.5746	20.9988	20.2832	20.9161	23.9308	19.8744	19.451	22.1694	16.1198	22.055	21.2915	22.4888	21.3182	21.3321	20.6496	20.7446	19.0718	20.3954	22.5959	20.8247	18.1376
20.7192	18.1949	17.76	23.3771	20.2767	18.7023	17.8623	20.8195	20.888	19.1552	19.2702	20.9487	25.4994	20.8023	18.6211	17.4514	20.9326	21.7159	18.6502	19.995	24.7619	21.5068	17.4245	18.7207	19.9979	21.9321	21.4154	19.4881	21.3792	22.1603	23.1862	20.5532	18.6779	20.3632	18.9448	23.6797	21.0659	20.2397	21.9398	20.4756	20.9942	18.5586	21.2513	21.783	18.5044	19.8902	20.5331	19.8476	22.0705	18.274
20.301	18.6198	20.8932	17.668	21.1082	20.2657	19.4369	20.5099	20.594	20.5771	19.9674	21.4136	19.1666	21.0391	24.3007	18.6298	22.8904	22.1891	21.9794	21.8411	17.2307	21.7992	17.6797	19.7211	20.7347	18.2815	20.9076	20.3091	19.5396	19.7132	20.1168	19.3818	20.991	20.7393	19.3617	21.668	20.1373	17.0964	20.493	20.9991	20.208	20.0625	20.119	19.2144	19.866	18.0995	20.2253	19.9339	20.309	19.9868
22.545	18.4888	19.8095	19.6818	20.7332	19.264	19.9491	23.1246	20.585	21.5588	20.4335	25.0187	18.9172	21.2336	20.205	22.9257	18.4121	19.7907	20.106	19.6319	18.933	18.6412	19.2903	19.7983	21.2182	19.1566	20.6973	23.6919	20.4618	19.797	21.7806	21.352	21.9559	21.0819	19.5108	21.0801	19.7109	20.1941	21.9811	19.9872	19.8992	23.1443	21.5079	18.3916	19.8079	17.6419	22.879	21.0164	20.499	18.2757
21.3213	21.3917	18.2323	19.5391	22.8468	18.6423	16.7578	19.9439	24.036	21.0778	18.6438	21.6537	21.8703	22.9933	20.9698	19.6446	20.2431	20.9056	22.6133	18.9861	21.6992	17.6931	21.8505	22.5744	20.977	21.5116	20.9857	23.4413	20.3318	19.2672	21.7971	23.0673	17.904	21.4353	21.191	19.4794	22.5349	19.9399	22.4441	21.6107	19.0953	20.0059	20.8165	18.3861	19.1558	17.2619	20.1036	19.9349	23.3471	19.6106
18.2599	18.099	21.1392	18.6419	20.5912	21.5809	21.2003	20.8073	21.6821	19.9916	19.1327	19.5395	18.7608	22.3778	22.1844	21.1078	21.0946	22.5168	21.3336	18.6955	21.1873	19.1395	18.8995	21.0309	21.9817	21.8076	20.9413	22.8064	20.9649	22.6736	19.1934	20.6305	20.4271	21.2381	19.8617	18.9577	22.6955	21.6038	21.796	20.245	21.2193	21.7582	20.4939	22.4587	18.8674	18.6373	18.3986	20.7786	20.5262	17.591
19.3618	18.6336	20.9232	19.1015	20.0262	20.7503	19.6199	19.922	19.6206	19.1247	18.4181	22.0146	19.6273	21.7063	19.3936	21.032	19.6738	19.4133	19.5066	19.4207	19.8263	21.1738	19.1734	18.7889	21.6731	18.7186	21.5602	22.8006	21.2711	19.4929	20.5751	18.8438	20.4308	20.5906	19.6605	18.0041	19.9719	18.6699	18.6792	21.6331	18.3949	20.4548	20.6807	19.6123	18.9899	18.4955	20.49	23.0392	21.2704	18.2953
23.7039	19.1377	23.5719	20.0457	23.2037	22.0547	22.6223	21.7912	22.4439	22.0627	20.2076	21.0071	16.6248	24.4256	23.453	20.0174	22.6888	22.4575	22.942	21.9303	24.2747	20.4775	21.9906	25.0041	24.931	22.3833	21.728	23.0175	20.9828	23.5585	23.8435	23.5526	22.7544	22.5089	19.5343	21.4629	23.4909	20.5329	22.4912	23.6117	23.2164	22.6628	23.8199	23.214	20.5281	20.9458	20.9006	22.1215	19.6558	19.2147
22.0507	18.5514	18.0159	19.7549	20.6803	18.8746	18.2231	20.2903	19.6755	19.4568	18.4401	20.67	18.13	20.3897	17.4731	19.8848	19.9694	18.7419	18.619	20.6993	18.2636	21.0002	23.1757	18.312	19.8393	18.7343	21.2069	21.1835	21.7307	19.1867	21.1033	19.1732	17.2788	21.2466	20.2333	19.4589	20.1365	19.0385	21.5693	20.4309	19.3408	18.8533	20.9812	22.9815	21.1124	23.6228	19.4488	19.5022	20.6371	22.9907
20.0083	19.6987	18.9506	19.8433	20.7728	19.5105	19.4549	20.0185	19.2922	19.3994	20.7142	20.2957	17.9178	20.0022	18.6113	18.0831	19.3147	18.4399	18.959	19.6341	17.9402	17.6564	18.3886	18.3589	21.2753	17.985	21.0772	19.9282	22.6808	20.0536	20.0062	19.3808	16.6413	21.7699	17.8114	17.9672	20.9228	18.222	18.068	20.5219	20.2481	19.686	21.1363	20.4609	18.9914	17.2311	20.4583	19.9473	21.4901	20.3204
18.4012	19.0437	18.7773	19.2842	20.462	19.1494	19.3711	20.7015	19.3299	19.6217	19.2929	19.7824	18.951	20.2395	19.8236	21.61	20.289	19.1938	18.9003	17.6788	19.6798	18.2734	16.4298	19.5656	20.9455	17.3797	20.7249	21.1227	20.5801	19.2778	19.1638	20.3728	17.4039	21.498	19.0255	18.5878	21.0994	19.4371	18.4718	20.2272	19.0145	19.1549	20.5875	20.5393	20.1902	21.0741	18.9631	20.5284	20.5953	18.5176
28.7544	25.5375	30.2114	29.78	23.6483	30.2746	29.4464	24.9177	29.7193	29.493	28.407	24.4206	29.5356	24.3678	29.3689	28.3355	29.1132	28.424	29.0513	27.8728	30.8293	28.5857	29.6454	30.6274	25.0053	30.2774	24.2196	28.803	26.5536	29.4338	29.6185	28.1403	30.8692	26.6153	28.086	29.0683	28.9719	29.5745	29.9183	26.0339	28.551	27.5844	28.1831	28.6988	28.1051	29.7852	25.051	26.1264	26.0737	25.6636
23.7638	18.8033	21.4556	21.1465	22.0414	24.1237	22.2981	20.5692	22.8536	23.4657	20.0855	20.5924	19.4508	20.389	22.2066	20.7431	21.5262	19.4157	22.6774	22.9099	20.7007	20.6628	21.0486	23.3864	23.3815	21.5102	19.9426	22.3636	22.1361	19.8385	19.4866	23.2167	20.0843	20.5421	18.8543	19.8635	20.5935	21.5046	20.7029	23.4681	23.4216	23.0463	21.3631	19.0321	18.3765	18.8763	19.2444	20.0878	20.1253	19.5521
26.6816	28.6937	26.8267	24.245	19.9172	26.6677	23.0709	21.5712	27.2224	25.2365	20.1877	21.1986	27.2588	21.2641	25.6114	24.022	26.1203	18.4689	25.6561	18.9635	25.0097	25.4086	26.7556	24.8049	20.5981	26.9413	20.6782	24.4856	20.8944	24.3762	26.9822	25.3888	21.375	21.1587	23.365	25.0361	24.7477	24.176	26.4227	23.1673	27.6223	25.5223	26.4639	19.3291	23.6228	22.3939	23.8686	20.5399	19.9174	21.4063
20.8217	16.6999	22.1026	19.1993	20.1867	21.8048	19.8947	19.8715	20.5976	20.7572	19.3456	20.2429	18.323	20.8043	21.8902	19.7976	21.9692	20.6846	21.4975	21.3608	18.6834	18.9622	18.4852	21.2114	23.9279	20.4008	21.0399	21.4754	20.435	20.3669	19.6467	19.9573	20.2235	22.2399	19.7113	20.0356	20.6557	19.5113	20.7872	19.862	22.0402	19.0974	20.7233	19.9899	19.8347	19.8668	19.104	20.8005	20.0057	19.6452
22.7415	18.0635	20.7369	20.1141	20.51	22.8252	23.9564	22.4975	19.477	21.7869	19.3879	20.6012	18.836	23.3725	23.5774	18.7776	21.5291	19.7397	19.3971	20.6631	19.7809	19.7129	18.0045	23.6695	22.5867	20.9832	24.6962	20.3893	20.4491	19.9652	19.9023	21.3711	22.0966	23.414	19.1812	20.9965	20.0204	18.2592	22.4875	23.4328	20.2746	20.4932	20.2978	18.954	20.1377	21.1828	20.873	20.9297	20.0067	19.3582
25.9344	24.6362	19.1308	19.2954	20.3799	20.9688	18.7303	21.2025	24.3134	19.0437	19.7816	19.9575	18.0862	23.5471	20.7037	23.2019	22.0188	18.7184	18.1877	20.8747	18.5391	20.4193	24.4973	19.8822	22.2877	18.4604	20.1753	20.6377	22.4437	19.546	21.811	20.1633	21.8894	20.8765	19.595	20.7461	20.3459	25.4022	21.7764	20.1749	18.7543	21.6013	20.1033	19.9143	20.17	20.8607	20.1761	20.1554	20.8708	21.811
24.7737	18.734	22.2944	21.5538	21.9229	24.6602	25.3265	23.1703	19.7306	25.1989	22.911	20.7028	19.9639	23.9657	24.6464	19.8248	23.9895	23.3002	24.3184	25.0176	21.3062	24.47	19.0416	23.7946	21.1219	18.16	20.8467	20.5947	20.9974	21.109	18.7545	20.0359	23.3576	21.5334	22.019	24.4504	21.0145	23.8568	23.085	20.3973	23.0345	22.8495	21.2643	23.5355	19.851	18.2478	19.3085	23.4295	19.5636	19.8497
22.5928	17.8328	22.8865	19.887	23.1664	22.7416	18.6874	23.7516	23.4109	20.497	19.6602	24.1637	18.1092	19.6567	22.0081	20.9928	23.5291	22.4887	23.1812	19.8485	22.9721	17.5719	20.8589	22.1959	23.4812	22.7297	24.9635	24.4926	21.507	23.7138	23.387	20.8756	22.9172	21.3699	18.9902	20.9068	24.1661	19.4213	22.3649	23.3589	21.5562	19.6392	22.4893	23.059	20.2213	23.5743	18.6677	22.2339	20.0195	18.6245
26.4027	27.1672	26.3905	26.8838	20.2984	27.5359	27.6822	24.3698	27.5233	26.9467	26.1111	26.5137	27.7098	23.6201	27.0455	26.1732	26.8988	25.47	26.2291	26.8014	28.2696	25.7627	26.1058	28.0495	26.4193	27.9597	21.3823	26.2107	25.8153	26.7746	26.2141	26.9258	26.1601	25.9363	24.7971	25.031	25.87	27.2434	26.8437	21.1798	26.8316	26.7378	25.021	27.647	26.6535	27.6192	22.3067	24.838	23.8213	25.2316
20.3681	18.3598	19.9001	19.8974	21.5856	21.2956	21.9778	20.8969	19.3309	19.8847	19.299	20.8082	19.0042	20.9528	22.2875	20.3038	20.3676	19.5232	21.5649	20.4076	19.716	19.8017	18.7222	21.8308	21.4627	21.6065	21.104	20.7609	21.5727	19.5733	20.2502	19.2343	18.395	21.6363	20.5048	17.8822	22.7274	17.9199	20.2475	19.2316	21.9102	19.4929	23.1674	20.3151	19.6214	17.0948	18.375	20.2536	20.6146	18.7799
21.3327	17.1313	20.1751	18.1958	20.7503	19.7795	21.6104	20.5574	21.8964	20.1464	19.7944	20.4541	19.8359	22.2039	20.4761	19.7303	19.3445	19.6385	19.7636	18.8542	17.4609	19.2896	18.8193	22.1873	22.4804	19.7763	20.1257	21.2159	21.0313	20.3005	18.8281	19.6449	23.087	20.6877	19.0087	20.1249	20.8085	18.7666	18.1229	20.0318	19.0602	19.8257	20.9572	20.5141	20.405	18.3468	20.1233	20.5789	20.1634	19.2945
21.5303	18.3759	21.5355	20.4446	19.1843	19.5028	21.0782	20.0919	21.0453	18.7034	19.7182	20.0995	19.9431	20.8609	22.1256	19.6754	23.3746	18.6048	21.4583	18.5034	19.2815	18.7208	18.8592	21.9171	23.9788	21.4084	20.331	20.9576	21.1232	21.8791	19.0756	20.4884	21.5696	24.823	19.7306	19.6098	21.8841	19.0158	19.7501	20.8979	21.9303	19.3928	21.6284	19.9651	19.3047	18.9376	19.6608	20.3304	20.833	18.9015
18.9118	22.2359	18.7811	20.6185	22.6521	17.994	22.4801	23.054	22.2684	20.2427	20.7813	20.5182	19.0594	23.1361	19.7393	18.7449	22.4006	18.2401	18.2652	17.8278	19.3139	17.941	18.2052	18.8575	20.5276	18.2553	20.2949	22.7742	21.0585	19.0728	23.2899	20.2286	18.0848	20.2706	20.4015	19.0378	21.4298	16.7328	20.5637	23.5889	18.4482	19.6123	20.3284	20.1476	19.4442	18.6791	20.6715	21.2591	20.6263	20.3707
21.1866	19.3688	22.162	19.5785	22.1713	18.2601	19.9882	20.8264	22.066	18.7792	22.0748	19.8333	19.2095	20.2835	21.3415	21.1716	21.2765	17.5378	18.526	18.0209	16.6296	19.1716	18.4668	19.2378	22.3105	18.8505	20.7568	20.0742	22.9898	18.1579	18.9403	20.3076	21.7635	20.4543	20.488	18.2535	21.5926	17.9525	20.0004	22.3088	20.2838	22.983	21.4554	21.2286	22.0981	19.2648	18.7139	20.3346	20.8932	20.8817
27.623	25.5265	26.233	26.8612	23.1455	26.0218	23.5721	25.5964	29.0069	27.6156	25.205	25.1307	27.3674	23.1593	25.5357	27.4094	28.0027	28.2009	27.6506	25.1149	29.0754	28.142	27.4192	28.5597	22.9847	27.4039	25.1657	28.2151	25.8436	28.3495	26.8532	27.4891	20.7497	23.4825	27.3392	27.093	27.2031	27.5584	27.8511	23.869	26.4766	25.9815	25.0135	26.216	26.1448	28.4634	24.087	24.7222	26.3377	22.6884
[truncated: 39 more columns]
