# Supplementary material for: Protein and Microbial Biomarkers in Sputum Discern Acute and Latent Tuberculosis in Investigation of Pastoral Ethiopian Cohort
Source: Front Cell Infect Microbiol. 2021 Jun 4;11:595554. doi: 10.3389/fcimb.2021.595554 (PMC8212885; doi:10.3389/fcimb.2021.595554)
Supplement: Supplementary file 4 [file Table_1.xlsx]

## Sheet: Human subject cohort - metadata
Supplementary Table 1. Human subject cohort with disease category, gender, age, and ethnic group identity from the geographic region of South Omo in Ethiopia.
Donor ID	Sample Code (LC-MS)	Donor ID	Gender	Age Range	Disease Category	Disease Category	Ethnic Group	Proteomics data	AFB	MTBC Culture	TB Symptoms
AB0042	ARB042_rep1	AB0042	F	20-29	Latently Infected	LTBI	Oromo	y
AB0043	ARB043_rep1	AB0043	F	30-39	Latently Infected	LTBI	Hamar	y (dnp)
AB0044	ARB044_rep1	AB0044	M	40-49	Latently Infected	LTBI	Hamar	y
AK0001	AKC001_rep1	AK0001	F	40-49	Latently Infected	LTBI	Daasanach	y
AK0002		AK0002			Latently Infected	LTBI	ND
AK0003	AKC003_rep1	AK0003	M	40-49	Latently Infected	LTBI	Daasanach	y
AK0006	AKC006_rep1	AK0006	F	40-49	Latently Infected	LTBI	Daasanach	y
AK0007	AKC007_rep1	AK0007	F	30-39	Latently Infected	LTBI	Daasanach	y
AK0010		AK0010	M	60-69	Latently Infected	LTBI	ND
AR0010	ARC010_rep1	AR0010	M	50-59	Latently Infected	LTBI	Daasanach	y
BE0016	BES016_rep1	BE0016	M	30-39	Latently Infected	LTBI	Hamar	y
DM0022	DM022_rep1	DM0022	F	40-49	Latently Infected	LTBI	Hamar	y
DM0023	DM023_rep1	DM0023			Latently Infected	LTBI	Hamar	y (dnp)
DM0024	DM024_rep1	DM0024	F	40-49	Latently Infected	LTBI	Hamar	y
DM0047	DM047_rep1	DM0047	F	30-39	Latently Infected	LTBI	Hamar	y
DM0048	DM048_rep1	DM0048	F	30-39	Latently Infected	LTBI	Hamar	y
DM0051	DM051_rep1	DM0051	M	20-29	Latently Infected	LTBI	Hamar	y
LO0001		LO0001	M	40-49	Latently Infected	LTBI	ND
LO0007	LOC007_rep1	LO0007	M	60-69	Latently Infected	LTBI	Daasanach	y (dnp)
LO0011	LOC011_rep1	LO0011	F	50-59	Latently Infected	LTBI	Daasanach	y
MK0002	MKC002_rep1	MK0002	F	40-49	Latently Infected	LTBI	Maale
MK0005		MK0005			Latently Infected	LTBI	ND
MK0007		MK0007			Latently Infected	LTBI	ND
MK0008		MK0008			Latently Infected	LTBI	ND
NP0002	NPC002_rep1	NP0002	F	50-59	Latently Infected	LTBI	Nyangatom	y
NP0003	NPC003_rep1	NP0003	F	30-39	Latently Infected	LTBI	Nyangatom	y
NP0004	NPC004_rep1	NP0004	F	50-59	Latently Infected	LTBI	Nyangatom	y (dnp)
NP0005	NPC005_rep1	NP0005	F	40-49	Latently Infected	LTBI	Nyangatom	y
NP0006	NPC006_rep1	NP0006	M	40-49	Latently Infected	LTBI	Nyangatom	y
NP0008	NPC008_rep1	NP0008	F	50-59	Latently Infected	LTBI	Nyangatom	y
NR0011	NRC011_rep1	NR0011	F	40-49	Latently Infected	LTBI	Nyangatom	y
SH0002	SH002_rep1	SH0002	F	30-39	Latently Infected	LTBI	ND	y (dnp)
AB0046	ARB046_rep1	AB0046	M	20-29	Latently Infected	LTBI	Aerbore	y (dnp)
AB0050		AB0050			Latently Infected	LTBI	ND
AB0052	ARB052_rep1	AB0052	M	20-29	Latently Infected	LTBI	Aerbore	y (dnp)
AL0001	ALC001_rep1	AL0001	F	20-29	Latently Infected	LTBI	NA	y (dnp)
AR0008	ARC008_rep1	AR0008	F	30-39	Latently Infected	LTBI	Daasanach	y (dnp)
BE0009	BES009_rep1	BE0009	M	20-29	Latently Infected	LTBI	Hamar	y
BE0012	BES012_rep1	BE0012	M	60-69	Latently Infected	LTBI	Hamar	y (dnp)
DM0046	DM046_rep1		M	40-49	Latently Infected	LTBI	Hamar	y (dnp)
LO0002		LO0002			Latently Infected	LTBI	ND
LO0008	LOC008_rep1	LO0008	F	30-39	Latently Infected	LTBI	Daasanach	y
LO0016	LOC016_rep1	LO0016	M	50-59	Latently Infected	LTBI	Daasanach	y (dnp)
NR0013	NRC013_rep1	NR0013	M	20-29	Latently Infected	LTBI	Nyangatom	y
SH0001	SH001_rep1	SH0001	M	40-49	Latently Infected	LTBI	ND	y (dnp)
SH0007	SH007_rep1	SH0007	M	50-59	Latently Infected	LTBI	ND	y
AB0041		AB0041			Negative Community Control	NCC	ND
AB0047		AB0047			Negative Community Control	NCC	ND
AB0051		AB0051	M	60-69	Negative Community Control	NCC	ND
AK0005	AKC005_rep1	AK0005	F	40-49	Negative Community Control	NCC	Daasanach	y
AL0003		AL0003	F	20-29	Negative Community Control	NCC	ND
AL0008		AL0008			Negative Community Control	NCC	ND
AL0011		AL0011			Negative Community Control	NCC	ND
AR0001	ARC001_rep1	AR0001	M	50-59	Negative Community Control	NCC	Daasanach	y
AR0003	ARC003_rep1	AR0003	F	30-39	Negative Community Control	NCC	Daasanach	y
AR0004		AR0004	F	20-29	Negative Community Control	NCC	ND
AR0006	ARC006_rep1	AR0006	M	50-59	Negative Community Control	NCC	Daasanach	y (dnp)
AR0009		AR0009	F	30-39	Negative Community Control	NCC	ND
AR0049	ARB049_rep1	AR0049	M	50-59	Negative Community Control	NCC	ND	y
BE0010	BES010_rep1	BE0010	M	30-39	Negative Community Control	NCC	Hamar	y
BE0011	BES011_rep1	BE0011	M		Negative Community Control	NCC	Hamar	y
BE0014		BE0014		20-29	Negative Community Control	NCC	ND
BE0015	BES015_rep1	BE0015	M	12-20	Negative Community Control	NCC	Hamar	y
DM0010	DM010_rep1	DM0010	M	40-49	Negative Community Control	NCC	Hamar	y
DM0050	DM050_rep1	DM0050	F	40-49	Negative Community Control	NCC	Hamar	y
GU0003		GU0003			Negative Community Control	NCC	ND
GU0004	GUBC004_rep1	GU0004	F	50-59	Negative Community Control	NCC	Dassenech	y
GU0006		GU0006	F	20-29	Negative Community Control	NCC	ND
KO0008		KO0008			Negative Community Control	NCC	ND
LO0003	LOC003_rep1	LO0003	M	50-59	Negative Community Control	NCC	Dassenech	y
LO0017	LOC017_rep1	LO0017	F		Negative Community Control	NCC	Dassenech	y
LO0020	LOC020_rep1	LO0020	M	20-29	Negative Community Control	NCC	Ari	y
LO0021	LOC0021_rep1	LO0021	M	30-39	Negative Community Control	NCC	ND	y
MFC001	MFC001_rep1	MFC001	F	30-39	Negative Community Control	NCC	ND	y (dnp)
MK0001	MKC001_rep1	MK0001	F	30-39	Negative Community Control	NCC	Maale	y
MK0004		MK0004			Negative Community Control	NCC	ND
MK0006		MK0006	F	20-29	Negative Community Control	NCC	ND
MK0009	MKC009_rep1		M	20-29	Negative Community Control	NCC	ND	y
MK0011	MKC011_rep1	MK0011	F	20-29	Negative Community Control	NCC	Maale	y
MK0013		MK0013	F	50-59	Negative Community Control	NCC	ND
MK0014		MK0014	F	50-59	Negative Community Control	NCC	ND
MK0015		MK0015	M	40-49	Negative Community Control	NCC	ND
MK0016	MKC016_rep1	MK0016	M	50-59	Negative Community Control	NCC	Maale	y
NP0001	NPC001_rep1	NP0001	F	50-59	Negative Community Control	NCC	Nyangatom	y (dnp)
NP0014		NP0014	M	40-49	Negative Community Control	NCC	ND
NR0002		NR0002	M	40-49	Negative Community Control	NCC	ND
NR0003		NR0003	F	50-59	Negative Community Control	NCC	ND
NR0006		NR0006	F	30-39	Negative Community Control	NCC	ND
NR0007	NRC007_rep1	NR0007	F	20-29	Negative Community Control	NCC	Nyangatom	y (dnp)
NR0008	NRC008_rep1	NR0008	M	50-59	Negative Community Control	NCC	Nyangatom	y
NR0009		NR0009			Negative Community Control	NCC	ND
NR0010		NR0010	F	50-59	Negative Community Control	NCC	ND
NR0014		NR0014			Negative Community Control	NCC	ND
NR0015	NRC015_rep1	NR0015	M	50-59	Negative Community Control	NCC	Nyangatom	y (dnp)
SH0003		SH0003	M	30-39	Negative Community Control	NCC	ND
SH0004		SH0004	F	20-29	Negative Community Control	NCC	ND
SH0016	SH016_rep1	SH0016	M	40-49	Negative Community Control	NCC	ND	y
SO0108		SO0108	F	20-29	Negative Community Control	NCC	ND
SO0299		SO0299			Negative Community Control	NCC	ND
SO1012		SO1012			Negative Community Control	NCC	Maale
SO0082	SO0082_rep1	SO0082	M	20-29	Pulmonary TB Patient	PTB	ND		+	-
SO0084	SO0084_rep1	SO0084	M	30-39	Pulmonary TB Patient	PTB	ND	y (dnp)	+	-
SO0089	SO0089_rep1	SO0089	M	40-49	Pulmonary TB Patient	PTB	Hamar	y	+	-
SO0093	SO0093_rep1	SO0093	F	30-39	Pulmonary TB Patient	PTB	ND	y	+	-
SO0095	SO0095_rep1	SO0095	M	12-20	Pulmonary TB Patient	PTB	Nyangatom	y	+	+
SO0096	SO0096_rep1	SO0096	F	40-49	Pulmonary TB Patient	PTB	ND	y	+	+
SO0097	SO0097_rep1	SO0097	M	40-49	Pulmonary TB Patient	PTB	ND		+	+
SO0098	SO0098_rep1	SO0098	F	20-29	Pulmonary TB Patient	PTB	Ari	y (dnp)	+	+
SO0099	SO0099_rep1	SO0099	F	30-39	Pulmonary TB Patient	PTB	Ari	y (dnp)	+	+
SO0100	SO0100_rep1	SO0100	M	50-59	Pulmonary TB Patient	PTB	Hamar	y (dnp)	+	+
SO0101		SO0101			Pulmonary TB Patient	PTB	ND		+	+
SO0103	SO0103_rep1		F	30-39	Pulmonary TB Patient	PTB	Male	y	+	+
SO0104	SO0104_rep1	SO0104	F	30-39	Pulmonary TB Patient	PTB	Male	y	+	-
SO0106	SO0106_rep1	SO0106	M	50-59	Pulmonary TB Patient	PTB	Ari	y	+	-
SO0107	SO0107_rep1	SO0107	F	30-39	Pulmonary TB Patient	PTB	Ari	y (dnp)	+	-
SO0123	SO0123_rep1	SO0123	M	20-29	Pulmonary TB Patient	PTB	Ari	y	+	-
SO0124	SO0124_rep1	SO0124	F	30-39	Pulmonary TB Patient	PTB	Ari	y	+	-
SO0127		SO0127			Pulmonary TB Patient	PTB	ND		+	+
SO0129	SO0129_rep1	SO0129	M	30-39	Pulmonary TB Patient	PTB	ND		+	-
SO0131		SO0131			Pulmonary TB Patient	PTB	ND		+	+
SO0132		SO0132			Pulmonary TB Patient	PTB	ND		+	+
SO0133		SO0133			Pulmonary TB Patient	PTB	ND		+	+
SO0134	SO0134_rep1	SO0134	M	30-39	Pulmonary TB Patient	PTB	Gurage	y	+	+
SO0135	SO0135_rep1	SO0135	F	30-39	Pulmonary TB Patient	PTB	Benatsemay/Maale	y (dnp)	+	-
SO0159	SO0159_rep1	SO0159	M	40-49	Pulmonary TB Patient	PTB	Maale	y	+	+
SO0181	AJ0012_rep1	SO0181	M	12-20	Pulmonary TB Patient	PTB	Maale	y (dnp)	+	+
SO0189	SO0189_rep1	SO0189	M	12-20	Pulmonary TB Patient	PTB	D/Ari	y	+	+
SO0202		SO0202			Pulmonary TB Patient	PTB	ND		+	+
SO0207	SO0207_rep1	SO0207	F	20-29	Pulmonary TB Patient	PTB	D/Ari	y	+	-
SO0228	SO0228_rep1	SO0228	M	40-49	Pulmonary TB Patient	PTB	Dassenech	y (dnp)	+	-
SO0229	SO0229_rep1		M	40-49	Pulmonary TB Patient	PTB	NA	y	+	+
SO0230	SO0230_rep1	SO0230	M	20-29	Pulmonary TB patient	PTB	NA	y (dnp)	+	+
SO0278	SO0278_rep1	SO0278	F	12-20	Pulmonary TB Patient	PTB	Hamar	y	+	-
SO0279	SO0279_rep1		F	40-49	Pulmonary TB Patient	PTB	Hamar	y	+	+
SO0327	SO0327_rep1	SO0327	M	30-39	Pulmonary TB Patient	PTB	Dassenech	y (dnp)	+	-
SO0372	SO0372_rep1	SO0372	F	40-49	Pulmonary TB Patient	PTB	Maale	y	+	+
SO0483		SO0483			Pulmonary TB Patient	PTB	ND		+	+
SO0500		SO0500			Pulmonary TB Patient	PTB	ND		+	+
SO0518	SO0518_rep1	SO0518	M	20-29	Pulmonary TB Patient	PTB	ND		+	+
SO0537	SO0537_rep1	SO0537	F	30-39	Pulmonary TB Patient	PTB	ND		+	+
SO0540	SO0540_rep1	SO0540	F	40-49	Pulmonary TB Patient	PTB	Bena	y	+	+
SO0542	SO0542_rep1	SO0542	M	50-59	Pulmonary TB Patient	PTB	Dassenech	y (dnp)	+	+
SO0543	SO0543_rep1	SO0543	M	12-20	Pulmonary TB Patient	PTB	ND		+	+
SO0591		SO0591			Pulmonary TB Patient	PTB	ND		+	+
SO0592	SO0592_rep1		F	12-20	Pulmonary TB Patient	PTB	ND	y (dnp)	+	+
SO0648	SO0648_rep1	SO0648	M	12-20	Pulmonary TB Patient	PTB	Maale	y	+	+
SO0649	SO0649_rep1	SO0649	M	50-59	Pulmonary TB Patient	PTB	Male	y (dnp)	+	+
SO0669	SO0669_rep1	SO0669	F	40-49	Pulmonary TB Patient	PTB	Ari	y	+	+
SO0724	SO0724_rep1	SO0724	F	40-49	Pulmonary TB Patient	PTB	Ari	y	+	+
SO0726	SO0726_rep1	SO0726	M	60-69	Pulmonary TB patient	PTB	ND	y	-	-	+
SO0756	SO0756_rep1	SO0756	M	12-20	Pulmonary TB patient	PTB	ND		+	+
SO0770	SO0770_rep1	SO0770	M	20-29	Pulmonary TB Patient	PTB	Hamar	y (dnp)	+	-
SO0771	SO0771_rep1	SO0771	F	20-29	Pulmonary TB Patient	PTB	ND	y (dnp)	+	+
SO0774		SO0774			Pulmonary TB Patient	PTB	ND		+	+
SO0789	SO0789_rep1	SO0789	M	70-79	Pulmonary TB Patient	PTB	Dassenech	y	+	+
SO0795	SO0795_rep1	SO0795	F	20-29	Pulmonary TB Patient	PTB	Ari	y (dnp)	+	+
SO0798	SO0798_rep1	SO0798	F	20-29	Pulmonary TB Patient	PTB	Amhara	y	+	+
SO0799	SO0799_rep1		M	30-39	Pulmonary TB Patient	PTB	Ari	y (dnp)	+	+
SO0800	SO0800_rep1	SO0800	M	20-29	Pulmonary TB Patient	PTB	Wolayta	y	+	+
SO0803	SO0803_rep1	SO0803	M	20-29	Pulmonary TB Patient	PTB	Konso	y	+	+
SO0806	SO0806_rep1		M	30-39	Pulmonary TB Patient	PTB	D/Ari	y	+	+
SO0808	SO0808_rep1		M	40-49	Pulmonary TB Patient	PTB	Ari	y	+	+
SO0809	SO0809_rep1	SO0809	F	20-29	Pulmonary TB Patient	PTB	Ari	y	+	+
SO0906	SO0906_rep1	SO0906	M	30-39	Pulmonary TB Patient	PTB	Hamar	y (dnp)	+	+
SO0977		SO0977			Pulmonary TB Patient	PTB	Hamar		+	+
SO1009	SO1009_rep1	SO1009	M	12-20	Pulmonary TB Patient	PTB	Maale	y	+	+
SO1010	SO1010_rep1	SO1010	M	70-79	Pulmonary TB Patient	PTB	Maale	y	+	+
SO1014	SO1014_rep1	SO1014	F	30-39	Pulmonary TB Patient	PTB	D/Ari	y	+	-
SO1015	SO1015_rep1	SO1015	M	30-39	Pulmonary TB Patient	PTB	NA	y (dnp)	-	-	+
SO1017	SO1017_rep1		M	40-49	Pulmonary TB patient	PTB	D/Ari	y	+	+
SO1168	SO1168_rep1	SO1168	M	12-20	Pulmonary TB patient	PTB	ND		+	+
SO1169	SO1169_rep1	SO1169	M	30-39	Pulmonary TB patient	PTB	ND	y	+	+
Legend:
A: patient/sputum donor ID
B: sputum sample ID (proteomics)
C: sputum sample ID (microbiome)
H: name of ethnic group; ND: not determined
I: proteomics analysis done; dnp: data did not pass the QC threshold
J-L: tests to diagnose active tuberculosis: AFB: acid fast bacillus smear microscopy; mycobacterial culture: microbial growth using Loewenstein method and Mtb analysis with spoligotyping; TB symptoms: only clinical signs and symptoms were used to diagnose TB
